# Supplementary material
Source: Research Square preprint supplement (doi:10.21203/rs.3.rs-9367379/v1)
Supplement: Supplementary file 1 [file 15ce37c24456243909ddccca.xlsx]

## Sheet: view_importances
Supp. Data4.Tab1 The contributions of different views to MCP-based DEA performance when the views were extracted from Fragpipe. N means number of DEA tests, SD means standard deviationn, SE = SD / sqrt(N)
platform	view	Mean	SD	N	SE
FragPipe	dlfq	0.3934	0.185968	330	0.0102372
FragPipe	maxlfq	0.336943	0.172975	330	0.00952195
FragPipe	top0	0.328712	0.173603	330	0.00955655
FragPipe	top3	0.308949	0.160655	330	0.00884375
FragPipe	count	0.365329	0.15969	330	0.00879062
Supp. Data4.Tab2 The contributions of different views to MCP-based DEA performance when the views were extracted from Maxquant. N means number of DEA tests, SD means standard deviationn, SE = SD / sqrt(N)
platform	Feature	Mean	SD	N	SE
Maxquant	dlfq	0.371743	0.159748	330	0.00879383		* some tests were dropped as no DEP can be found
Maxquant	maxlfq	0.345562	0.17016	330	0.00936701
Maxquant	top0	0.318594	0.152824	323*	0.00850337
Maxquant	top3	0.337538	0.159352	323	0.00886658
Maxquant	count	0.354052	0.143967	323	0.00801052
Supp. Data4.Tab3 The contributions of different views to MCP-based DEA performance when the views were extracted from DIA-NN. N means number of DEA tests, SD means standard deviationn, SE = SD / sqrt(N)
platform	Feature	Mean	SD	N	SE
DIANN	dlfq	0.446799	0.172924	98	0.017468
DIANN	maxlfq	0.387882	0.190514	98	0.0192449
DIANN	top3	0.365312	0.193793	98	0.0195761
DIANN	top1	0.371436	0.200135	98	0.0202166
Supp. Data4.Tab4 The contributions of different views to MCP-based DEA performance when the views were extracted from Spectronaut. N means number of DEA tests, SD means standard deviationn, SE = SD / sqrt(N)
platform	Feature	Mean	SD	N	SE
Spectronaut	dlfq	0.441534	0.165729	98	0.0167412
Spectronaut	maxlfq	0.404743	0.166611	98	0.0168303
Spectronaut	top3	0.35924	0.174464	98	0.0176235
Spectronaut	top1	0.365912	0.151339	98	0.0152876

## Sheet: view_interactions
Supp. Data4.Tab5 The z-score normalized interaction strength between paired views evaluated on DDA datasets processed by FragPipe.
From	To	value
dlfq	count	-0.0235492
dlfq	maxlfq	0.0232019
dlfq	top0	-0.0976596
dlfq	top3	0.0715791
count	dlfq	-0.0479917
count	maxlfq	-0.0687395
count	top0	-0.153622
count	top3	-0.0724054
maxlfq	dlfq	-0.0551869
maxlfq	count	0.0727036
maxlfq	top0	-0.0261607
maxlfq	top3	-0.0885088
top0	dlfq	0.108662
top0	count	0.0128891
top0	maxlfq	-0.106328
top0	top3	-0.176712
top3	dlfq	0.100333
top3	count	0.00182762
top3	maxlfq	-0.142091
top3	top0	-0.0235888
Supp. Data4.Tab6 The z-score normalized interaction strength between paired views evaluated on DDA datasets processed by Maxquant.
From	To	value
dlfq	count	-0.0409804
dlfq	maxlfq	-0.0527546
dlfq	top0	-0.159993
dlfq	top3	-0.0568867
count	dlfq	0.0513284
count	maxlfq	-0.0873562
count	top0	0.0449069
count	top3	-0.198754
maxlfq	dlfq	0.0503947
maxlfq	count	0.060077
maxlfq	top0	-0.0378142
maxlfq	top3	-0.129579
top0	dlfq	0.0968767
top0	count	-0.0745112
top0	maxlfq	-0.04003
top0	top3	0.101827
top3	dlfq	-0.0109871
top3	count	-0.0389401
top3	maxlfq	0.0256393
top3	top0	-0.0607703
Supp. Data4.Tab7 The z-score normalized interaction strength between paired views evaluated on DIA datasets processed by DIA-NN.
From	To	value
dlfq	maxlfq	0.0270373
dlfq	top1	-0.421624
dlfq	top3	-0.0653155
maxlfq	dlfq	-0.139735
maxlfq	top1	0.0654835
maxlfq	top3	-0.0150183
top1	dlfq	0.250523
top1	maxlfq	-0.0972753
top1	top3	0.0269795
top3	dlfq	-0.102605
top3	maxlfq	-0.16437
top3	top1	-0.212539
Supp. Data4.Tab8 The z-score normalized interaction strength between paired views evaluated on DIA datasets processed by Spectronaut.
From	To	value
dlfq	maxlfq	-0.11147
dlfq	top1	-0.0899582
dlfq	top3	-0.42207
maxlfq	dlfq	-0.0800743
maxlfq	top1	0.0245643
maxlfq	top3	-0.291581
top1	dlfq	0.111383
top1	maxlfq	-0.256724
top1	top3	-0.0947172
top3	dlfq	0.0832384
top3	maxlfq	-0.24936
top3	top1	-0.0327889
