# Supplementary material
Source: Research Square preprint supplement (doi:10.21203/rs.3.rs-9367379/v1)
Supplement: Supplementary file 2 [file 3d7b91a6e31c2de50c91fb19.xlsx]

## Sheet: DEPs_bulk
Supp. Data8.Tab1 The DEPs detected by different methods from the bulk U2OS data. In databse means the protein has been validated to be INFy-response, the database is shown in Supp. Data8.Tab3.										Supp. Data8.Tab2 Statistics of DEPs validated by INFy_repsonse protein database.
protein	Validation_Status	MCP	dlfq	maxlfq	top0	top3	count			Method	in database	not in database	Total No.
A6NJ78	Not_in_database	1	0	0	0	0	0			MCP	29	138	167
O00401	Not_in_database	1	0	0	1	1	0			dlfq	17	81	98
O00478	Not_in_database	1	0	0	0	0	0			maxlfq	14	74	88
O00488	Not_in_database	1	1	0	1	1	0			top0	18	118	136
O14647	Not_in_database	1	0	0	0	0	0			top3	14	51	65
O14879	Not_in_database	1	0	0	0	0	0			count	9	53	62
O14933	Not_in_database	1	1	1	0	1	0
O15240	Not_in_database	1	0	0	0	0	0
O15439	Not_in_database	1	1	0	1	0	0
O15484	Not_in_database	1	0	0	0	0	0
O15533	In_database	1	1	1	1	1	0
O43505	Not_in_database	1	0	0	0	0	0
O43570	Not_in_database	1	0	0	0	0	0
O60427	Not_in_database	1	0	0	0	1	0
O75496	Not_in_database	1	0	0	0	0	0
O75629	Not_in_database	1	0	0	0	0	0
O94864	Not_in_database	1	0	0	0	0	0
O95139	Not_in_database	1	0	0	0	0	0
O95352	Not_in_database	1	0	0	1	0	0
O95376	Not_in_database	1	0	0	0	0	0
O95870	Not_in_database	1	0	0	0	0	0
P00973	Not_in_database	1	0	0	0	0	0
P01889	In_database	1	1	0	0	0	0
P01903	In_database	1	0	0	0	0	0
P01911	In_database	1	0	0	0	0	0
P04233	In_database	1	0	0	0	0	0
P09417	Not_in_database	1	0	0	1	0	0
P09455	Not_in_database	1	1	1	1	0	0
P09914	Not_in_database	1	0	0	0	0	0
P10321	In_database	1	1	1	1	1	0
P10914	In_database	1	0	0	0	0	0
P10915	Not_in_database	1	0	0	0	0	0
P13051	Not_in_database	1	1	0	0	0	0
P13284	In_database	1	0	0	0	0	0
P13591	In_database	1	0	0	0	0	0
P13929	Not_in_database	1	0	0	0	0	0
P14902	In_database	1	0	0	0	0	0
P14923	In_database	1	1	0	1	0	0
P15291	Not_in_database	1	0	0	0	1	0
P15529	Not_in_database	1	0	0	0	0	0
P16383	Not_in_database	1	0	0	0	0	0
P17900	Not_in_database	1	0	0	0	0	0
P22914	Not_in_database	1	1	0	1	1	0
P23381	In_database	1	1	1	1	1	1
P28062	In_database	1	0	1	0	0	0
P28065	In_database	1	1	1	1	1	0
P28347	Not_in_database	1	0	0	0	0	0
P29323	Not_in_database	1	1	0	0	0	0
P29590	In_database	1	1	1	1	1	0
P30536	Not_in_database	1	0	0	0	0	0
P30740	In_database	1	0	0	0	0	0
P32455	In_database	1	1	0	0	0	0
P32456	In_database	1	1	0	1	1	0
P33947	Not_in_database	1	1	1	0	1	0
P34913	Not_in_database	1	0	0	0	0	0
P40306	In_database	1	0	1	1	1	0
P41226	Not_in_database	1	0	0	0	0	0
P42224	In_database	1	1	0	0	0	0
P42330	Not_in_database	1	1	0	0	0	0
P42345	In_database	1	1	0	0	0	0
P49761	Not_in_database	1	0	0	0	0	0
P50443	Not_in_database	1	0	0	0	0	0
P51808	Not_in_database	1	0	0	0	0	0
P53674	Not_in_database	1	0	0	0	0	0
P53801	Not_in_database	1	0	0	0	0	0
P54098	Not_in_database	1	0	0	0	0	0
P54852	Not_in_database	1	0	0	0	0	0
P56211	Not_in_database	1	0	0	0	0	0
P59190	Not_in_database	1	0	0	0	0	0
P61513	Not_in_database	1	0	0	0	0	0
P61769	In_database	1	0	1	1	1	0
P62273	Not_in_database	1	0	0	0	0	0
P62877	In_database	1	0	0	0	0	0
P78310	Not_in_database	1	0	0	0	0	0
P78330	Not_in_database	1	0	0	0	0	0
P84243	Not_in_database	1	0	1	0	0	0
Q01469	Not_in_database	1	1	0	0	0	0
Q03518	In_database	1	1	1	1	1	1
Q03519	In_database	1	1	0	0	0	0
Q07352	Not_in_database	1	1	0	0	0	0
Q12840	Not_in_database	1	0	0	0	0	0
Q12933	In_database	1	0	0	0	0	0
Q13325	Not_in_database	1	0	1	0	0	0
Q13485	In_database	1	0	0	0	0	0
Q13887	Not_in_database	1	0	0	0	0	0
Q14119	Not_in_database	1	0	0	0	0	0
Q14814	Not_in_database	1	0	0	0	0	0
Q2NKX8	Not_in_database	1	0	0	0	0	0
Q2TAA2	Not_in_database	1	1	0	1	1	0
Q460N5	Not_in_database	1	1	1	1	0	1
Q53EL6	Not_in_database	1	0	0	0	0	0
Q53GL7	Not_in_database	1	0	0	0	0	0
Q53HC9	Not_in_database	1	0	0	0	0	0
Q5TGZ0	Not_in_database	1	1	0	1	1	0
Q5VZE5	Not_in_database	1	1	0	0	0	0
Q6ICH7	Not_in_database	1	0	0	1	0	0
Q6IQ49	Not_in_database	1	0	0	0	0	0
Q6PIW4	Not_in_database	1	0	0	0	0	0
Q6UVK1	Not_in_database	1	0	1	1	0	1
Q6UW56	Not_in_database	1	0	0	0	0	0
Q6UW68	Not_in_database	1	0	0	1	0	0
Q6UWP8	Not_in_database	1	0	0	0	0	0
Q6ZRY4	Not_in_database	1	0	0	0	0	0
Q7Z7K6	Not_in_database	1	0	0	0	0	0
Q8IVG5	Not_in_database	1	0	0	0	0	0
Q8IVT2	Not_in_database	1	0	0	0	0	0
Q8IXQ6	Not_in_database	1	1	1	1	0	1
Q8IYS1	Not_in_database	1	0	0	0	0	0
Q8N3Z3	Not_in_database	1	0	0	0	0	0
Q8N9N8	Not_in_database	1	0	0	0	0	0
Q8NBW4	Not_in_database	1	0	0	0	0	0
Q8NC60	Not_in_database	1	0	0	1	0	0
Q8ND82	Not_in_database	1	0	0	1	0	0
Q8NFP7	Not_in_database	1	0	0	0	0	0
Q8TCC3	Not_in_database	1	0	0	0	0	0
Q8TDB6	Not_in_database	1	1	1	1	1	1
Q8WUH6	Not_in_database	1	1	0	1	1	0
Q8WUM9	Not_in_database	1	1	0	0	0	0
Q8WXD5	Not_in_database	1	0	0	0	0	0
Q92793	In_database	1	1	0	1	0	0
Q92805	Not_in_database	1	0	0	0	0	0
Q969S0	Not_in_database	1	0	0	0	0	0
Q96C90	Not_in_database	1	0	0	1	0	0
Q96DX7	Not_in_database	1	0	0	0	0	0
Q96FS4	Not_in_database	1	0	0	0	0	0
Q96GA3	Not_in_database	1	0	0	0	0	0
Q96H79	Not_in_database	1	0	0	0	0	0
Q96PP8	In_database	1	0	0	0	0	0
Q96PP9	Not_in_database	1	0	0	0	0	0
Q96PZ2	Not_in_database	1	0	0	0	0	0
Q99878	Not_in_database	1	0	0	0	0	0
Q9BQ04	Not_in_database	1	0	0	0	0	0
Q9BQ95	Not_in_database	1	0	0	0	0	0
Q9BQE5	Not_in_database	1	1	1	1	1	1
Q9BSR8	Not_in_database	1	0	0	0	0	0
Q9BSV6	Not_in_database	1	0	0	0	0	0
Q9BUR4	Not_in_database	1	0	0	0	0	0
Q9BUT1	Not_in_database	1	0	0	0	0	0
Q9BVK2	Not_in_database	1	1	0	0	0	0
Q9BVS5	Not_in_database	1	0	0	0	0	0
Q9BX59	Not_in_database	1	0	0	0	0	0
Q9BY32	Not_in_database	1	0	0	1	1	0
Q9BYI3	Not_in_database	1	1	0	1	1	0
Q9C035	Not_in_database	1	0	0	0	0	0
Q9H040	Not_in_database	1	0	0	0	0	0
Q9H0X4	Not_in_database	1	0	0	0	0	0
Q9H173	Not_in_database	1	0	0	0	0	0
Q9H3H5	Not_in_database	1	1	0	0	1	0
Q9H3R5	Not_in_database	1	0	0	0	0	0
Q9HCJ6	Not_in_database	1	0	0	0	0	0
Q9NSP4	Not_in_database	1	0	0	0	0	0
Q9NXR1	Not_in_database	1	0	0	0	0	0
Q9NZ08	Not_in_database	1	1	0	1	0	0
Q9P0S3	Not_in_database	1	1	0	1	1	0
Q9P121	Not_in_database	1	0	0	0	0	0
Q9UH65	Not_in_database	1	1	0	1	0	0
Q9UL26	Not_in_database	1	1	0	0	1	0
Q9UL45	Not_in_database	1	0	0	1	0	0
Q9UMR5	Not_in_database	1	0	0	0	0	0
Q9UNS1	Not_in_database	1	0	0	0	0	0
Q9Y3E2	Not_in_database	1	0	0	0	0	0
Q9Y3Z3	Not_in_database	1	1	1	1	1	0
Q9Y4G6	Not_in_database	1	1	1	0	0	0
Q9Y547	Not_in_database	1	1	1	1	1	0
Q9Y5Q0	Not_in_database	1	1	0	0	0	0
Q9Y6K0	Not_in_database	1	0	0	0	0	0
Q9Y6N7	Not_in_database	1	1	0	0	0	0
O75170	Not_in_database	0	1	0	0	0	0
O75347	Not_in_database	0	1	1	0	0	0
O95864	Not_in_database	0	1	1	1	0	0
P04439	In_database	0	1	1	1	1	0
P06396	Not_in_database	0	1	0	0	0	0
P07108	Not_in_database	0	1	1	1	1	0
P11137	Not_in_database	0	1	0	0	0	0
P19474	Not_in_database	0	1	0	0	0	0
P23497	In_database	0	1	1	0	0	0
P29034	Not_in_database	0	1	1	1	1	0
P30086	Not_in_database	0	1	1	1	0	0
P30711	Not_in_database	0	1	0	0	0	0
P33908	Not_in_database	0	1	0	0	0	0
P43007	Not_in_database	0	1	0	0	0	0
P48200	Not_in_database	0	1	0	0	0	0
P52630	In_database	0	1	0	0	0	0
P52943	Not_in_database	0	1	1	0	0	0
P63313	Not_in_database	0	1	1	0	0	0
Q12765	Not_in_database	0	1	1	1	1	1
Q13257	Not_in_database	0	1	0	0	0	0
Q14118	Not_in_database	0	1	0	1	0	0
Q14139	Not_in_database	0	1	0	0	0	0
Q14376	Not_in_database	0	1	1	1	1	0
Q14533	Not_in_database	0	1	0	0	0	0
Q14956	Not_in_database	0	1	1	1	1	0
Q16763	Not_in_database	0	1	1	1	0	0
Q16831	Not_in_database	0	1	0	0	1	0
Q53FA7	Not_in_database	0	1	0	0	0	0
Q5F1R6	Not_in_database	0	1	0	0	0	0
Q63HN8	Not_in_database	0	1	1	1	0	1
Q6PCE3	Not_in_database	0	1	1	0	0	0
Q7Z2X7	Not_in_database	0	1	1	1	1	0
Q86VI3	Not_in_database	0	1	0	0	0	0
Q8IWY9	Not_in_database	0	1	0	0	0	0
Q8IYM9	Not_in_database	0	1	0	0	0	0
Q8IYW5	Not_in_database	0	1	0	0	0	0
Q8WXF7	Not_in_database	0	1	0	1	0	0
Q9BRB3	Not_in_database	0	1	0	0	0	0
Q9BT73	Not_in_database	0	1	1	1	1	0
Q9BWH6	Not_in_database	0	1	0	0	0	0
Q9H6X2	Not_in_database	0	1	0	0	0	0
Q9HB58	Not_in_database	0	1	0	0	0	0
Q9NZD2	Not_in_database	0	1	0	1	1	0
Q9UGR2	Not_in_database	0	1	0	0	0	0
Q9UI42	Not_in_database	0	1	1	1	0	0
Q9UJK0	Not_in_database	0	1	0	0	0	0
Q9UKD1	Not_in_database	0	1	0	0	0	0
Q9UKV5	Not_in_database	0	1	0	0	0	0
Q9ULI3	Not_in_database	0	1	0	0	0	0
Q9ULX9	Not_in_database	0	1	0	0	1	0
Q9UNN8	Not_in_database	0	1	0	1	0	0
Q9UPQ8	Not_in_database	0	1	0	0	0	0
A6NDG6	Not_in_database	0	0	1	0	0	0
O75368	Not_in_database	0	0	1	0	0	0
O94903	Not_in_database	0	0	1	0	0	0
P00441	Not_in_database	0	0	1	0	0	1
P03905	Not_in_database	0	0	1	0	0	0
P04080	Not_in_database	0	0	1	1	1	0
P06703	Not_in_database	0	0	1	0	0	0
P08758	In_database	0	0	1	1	0	0
P09525	Not_in_database	0	0	1	1	0	0
P12955	Not_in_database	0	0	1	1	0	1
P14649	Not_in_database	0	0	1	0	0	0
P15374	Not_in_database	0	0	1	1	1	0
P21266	Not_in_database	0	0	1	0	0	0
P21291	Not_in_database	0	0	1	0	0	0
P28074	In_database	0	0	1	0	0	0
P30043	Not_in_database	0	0	1	0	0	0
P35813	Not_in_database	0	0	1	1	0	0
P36405	Not_in_database	0	0	1	1	0	0
P40261	Not_in_database	0	0	1	0	0	0
P49773	Not_in_database	0	0	1	0	0	0
P51452	Not_in_database	0	0	1	0	0	0
P52565	Not_in_database	0	0	1	1	0	0
P54278	Not_in_database	0	0	1	0	0	0
P55039	Not_in_database	0	0	1	0	0	0
P61086	Not_in_database	0	0	1	0	0	0
P62942	Not_in_database	0	0	1	0	0	0
P63173	Not_in_database	0	0	1	0	0	0
Q06203	Not_in_database	0	0	1	0	0	0
Q14331	Not_in_database	0	0	1	0	0	0
Q5TEC6	Not_in_database	0	0	1	0	0	0
Q6FI81	Not_in_database	0	0	1	1	0	0
Q6PD74	Not_in_database	0	0	1	0	0	0
Q8IXU6	Not_in_database	0	0	1	0	0	0
Q8IYS2	Not_in_database	0	0	1	1	0	0
Q8WW12	Not_in_database	0	0	1	1	0	0
Q8WZA0	Not_in_database	0	0	1	0	0	0
Q92530	In_database	0	0	1	0	0	1
Q99720	Not_in_database	0	0	1	0	0	0
Q9BRA2	Not_in_database	0	0	1	0	0	0
Q9H3K6	Not_in_database	0	0	1	0	0	0
Q9H4A4	Not_in_database	0	0	1	1	0	0
Q9P000	Not_in_database	0	0	1	0	0	0
Q9P273	Not_in_database	0	0	1	0	0	0
Q9UBN7	Not_in_database	0	0	1	0	0	0
Q9UKK9	Not_in_database	0	0	1	0	0	0
Q9Y282	Not_in_database	0	0	1	0	0	0
Q9Y303	Not_in_database	0	0	1	0	0	0
Q9Y4X5	Not_in_database	0	0	1	0	0	0
O00299	Not_in_database	0	0	0	1	0	0
O00468	Not_in_database	0	0	0	1	0	0
O14545	Not_in_database	0	0	0	1	1	0
O15347	Not_in_database	0	0	0	1	0	0
O15357	Not_in_database	0	0	0	1	0	0
O75477	Not_in_database	0	0	0	1	0	0
O76024	Not_in_database	0	0	0	1	0	0
O94760	Not_in_database	0	0	0	1	0	0
O94966	Not_in_database	0	0	0	1	0	0
O95336	Not_in_database	0	0	0	1	0	0
P05423	Not_in_database	0	0	0	1	0	0
P08579	Not_in_database	0	0	0	1	1	0
P11766	Not_in_database	0	0	0	1	0	0
P21399	Not_in_database	0	0	0	1	0	0
P26440	Not_in_database	0	0	0	1	0	0
P28072	In_database	0	0	0	1	0	0
P33527	Not_in_database	0	0	0	1	0	0
P38435	Not_in_database	0	0	0	1	1	0
P40121	Not_in_database	0	0	0	1	0	0
P48739	Not_in_database	0	0	0	1	0	0
P53365	Not_in_database	0	0	0	1	1	0
P78318	Not_in_database	0	0	0	1	1	0
P78559	Not_in_database	0	0	0	1	0	0
Q07820	In_database	0	0	0	1	0	0
Q07864	Not_in_database	0	0	0	1	0	0
Q07954	In_database	0	0	0	1	0	1
Q12986	Not_in_database	0	0	0	1	0	0
Q13740	Not_in_database	0	0	0	1	1	1
Q14166	Not_in_database	0	0	0	1	1	0
Q16527	Not_in_database	0	0	0	1	0	0
Q24JP5	Not_in_database	0	0	0	1	0	0
Q5H8A4	Not_in_database	0	0	0	1	0	0
Q68CP9	Not_in_database	0	0	0	1	0	0
Q6P1N9	Not_in_database	0	0	0	1	0	0
Q6P3W7	Not_in_database	0	0	0	1	0	0
Q702N8	Not_in_database	0	0	0	1	1	0
Q86SJ2	Not_in_database	0	0	0	1	0	0
Q8IWA4	Not_in_database	0	0	0	1	0	0
Q8IXM6	Not_in_database	0	0	0	1	0	0
Q8N6M3	Not_in_database	0	0	0	1	1	0
Q8NEB9	In_database	0	0	0	1	0	0
Q8TD19	Not_in_database	0	0	0	1	0	0
Q8TEQ8	Not_in_database	0	0	0	1	1	0
Q92508	Not_in_database	0	0	0	1	0	0
Q92597	Not_in_database	0	0	0	1	0	1
Q96BK5	Not_in_database	0	0	0	1	0	0
Q96F63	Not_in_database	0	0	0	1	0	0
Q96FF9	Not_in_database	0	0	0	1	0	0
Q99541	Not_in_database	0	0	0	1	0	0
Q99643	Not_in_database	0	0	0	1	0	0
Q9BTT6	Not_in_database	0	0	0	1	0	0
Q9BZ95	Not_in_database	0	0	0	1	0	0
Q9H7E9	Not_in_database	0	0	0	1	0	0
Q9H910	Not_in_database	0	0	0	1	0	0
Q9HBI0	Not_in_database	0	0	0	1	0	0
Q9NSK0	Not_in_database	0	0	0	1	0	0
Q9NVM6	Not_in_database	0	0	0	1	0	0
Q9NX61	Not_in_database	0	0	0	1	0	0
Q9NZN4	Not_in_database	0	0	0	1	0	0
Q9UBB6	Not_in_database	0	0	0	1	0	0
Q9UI30	Not_in_database	0	0	0	1	1	0
Q9UKG1	In_database	0	0	0	1	0	0
Q9UL03	Not_in_database	0	0	0	1	0	0
Q9UNW1	Not_in_database	0	0	0	1	0	0
Q9Y291	Not_in_database	0	0	0	1	0	0
Q9Y2X0	Not_in_database	0	0	0	1	0	0
Q9Y5B8	Not_in_database	0	0	0	1	0	0
Q9Y6N5	Not_in_database	0	0	0	1	0	0
O60306	Not_in_database	0	0	0	0	1	0
O60870	Not_in_database	0	0	0	0	1	0
O75204	Not_in_database	0	0	0	0	1	0
O95453	Not_in_database	0	0	0	0	1	0
P00491	Not_in_database	0	0	0	0	1	0
P17655	In_database	0	0	0	0	1	0
P35222	In_database	0	0	0	0	1	0
P35237	In_database	0	0	0	0	1	0
P52888	In_database	0	0	0	0	1	0
P98179	Not_in_database	0	0	0	0	1	0
Q15003	Not_in_database	0	0	0	0	1	0
Q53H96	Not_in_database	0	0	0	0	1	0
Q96GQ5	Not_in_database	0	0	0	0	1	0
O43399	Not_in_database	0	0	0	0	0	1
O43491	Not_in_database	0	0	0	0	0	1
O60568	Not_in_database	0	0	0	0	0	1
O60664	Not_in_database	0	0	0	0	0	1
P04792	Not_in_database	0	0	0	0	0	1
P06733	Not_in_database	0	0	0	0	0	1
P08133	Not_in_database	0	0	0	0	0	1
P10586	Not_in_database	0	0	0	0	0	1
P11021	In_database	0	0	0	0	0	1
P11047	In_database	0	0	0	0	0	1
P11172	Not_in_database	0	0	0	0	0	1
P13489	Not_in_database	0	0	0	0	0	1
P13639	Not_in_database	0	0	0	0	0	1
P14866	Not_in_database	0	0	0	0	0	1
P18206	In_database	0	0	0	0	0	1
P21333	Not_in_database	0	0	0	0	0	1
P23368	Not_in_database	0	0	0	0	0	1
P28838	Not_in_database	0	0	0	0	0	1
P31930	Not_in_database	0	0	0	0	0	1
P35251	Not_in_database	0	0	0	0	0	1
P43490	Not_in_database	0	0	0	0	0	1
P46821	Not_in_database	0	0	0	0	0	1
P51114	Not_in_database	0	0	0	0	0	1
P51149	In_database	0	0	0	0	0	1
P53621	Not_in_database	0	0	0	0	0	1
P60174	In_database	0	0	0	0	0	1
P61163	Not_in_database	0	0	0	0	0	1
P61201	Not_in_database	0	0	0	0	0	1
P61619	Not_in_database	0	0	0	0	0	1
P62805	Not_in_database	0	0	0	0	0	1
P63104	Not_in_database	0	0	0	0	0	1
P85037	Not_in_database	0	0	0	0	0	1
Q13308	Not_in_database	0	0	0	0	0	1
Q14126	Not_in_database	0	0	0	0	0	1
Q14195	Not_in_database	0	0	0	0	0	1
Q6IN85	Not_in_database	0	0	0	0	0	1
Q6YHK3	Not_in_database	0	0	0	0	0	1
Q86Y56	Not_in_database	0	0	0	0	0	1
Q92621	Not_in_database	0	0	0	0	0	1
Q96A65	Not_in_database	0	0	0	0	0	1
Q99470	Not_in_database	0	0	0	0	0	1
Q9BVS4	Not_in_database	0	0	0	0	0	1
Q9H583	Not_in_database	0	0	0	0	0	1
Q9NZM1	Not_in_database	0	0	0	0	0	1
Q9UHB6	Not_in_database	0	0	0	0	0	1
Q9UII2	Not_in_database	0	0	0	0	0	1
Q9Y618	Not_in_database	0	0	0	0	0	1

## Sheet: INFy_response_proteins
Supp. Data8.Tab3 The list of protein having been validated to be INFy-response.
Index	IFNy_database	Entry
1	ND1	A0A023I7N5
2	ITGA4	A0A023IP86
3	ITGA4	A0A023IP88
4	ITGA4	A0A023IP90
5	ITGA4	A0A023IPA8
6	ITGA4	A0A023IPA9
7	ITGA4	A0A023IPH2
8	ITGA4	A0A023IPH8
9	ITGA4	A0A023IPI3
10	ITGA4	A0A023IQA6
11	ITGA4	A0A023IQJ3
12	ITGA4	A0A023IQJ5
13	ITGA4	A0A023IQK0
14	HLA-DRB1	A0A023NF12
15	RUNX1	A0A023PPR2
16	ND1	A0A023Q5S8
17	ND1	A0A023Q700
18	ND1	A0A023Q7R1
19	ND1	A0A023Q875
20	ND1	A0A023QC18
21	COX2	A0A023QCZ2
22	ND1	A0A023QFT1
23	ND1	A0A023QG73
24	ND1	A0A023QHN5
25	ND1	A0A023QKB4
26	ND1	A0A023QKQ2
27	ND1	A0A023QL98
28	ND1	A0A023QMR7
29	ND1	A0A023QR60
30	COX2	A0A023QRX9
31	ND1	A0A023QRY9
32	ND1	A0A023QST8
33	ND1	A0A023QUI7
34	ND1	A0A023QW57
35	ND1	A0A023QWQ3
36	ND1	A0A023QXG8
37	ND1	A0A023QXJ5
38	ND1	A0A023QXT5
39	ND1	A0A023QYN1
40	COX2	A0A023QZ25
41	ND1	A0A023QZ36
42	ND1	A0A023QZZ1
43	ND1	A0A023R170
44	ND1	A0A023R1S1
45	ND1	A0A023R2I7
46	ND1	A0A023R388
47	ND1	A0A023R4Q0
48	ND1	A0A023R5N9
49	HLA-B	A0A023T393
50	HLA-B	A0A023T398
51	HLA-B	A0A023T424
52	HLA-B	A0A023T428
53	HLA-B	A0A023T4T9
54	HLA-B	A0A023T4U2
55	HLA-B	A0A023T5E6
56	HLA-B	A0A023T5F1
57	HLA-B	A0A023T5F6
58	HLA-B	A0A023T5V9
59	HLA-B	A0A023T5W2
60	HLA-DRB1	A0A023VRX5
61	HLA-DRB1	A0A023VT86
62	HLA-B	A0A023VWE2
63	ALK	A0A024A2P5
64	ITGB2	A0A024D9P8
65	ITGB2	A0A024D9S0
66	ITGB2	A0A024DAE5
67	ITGB2	A0A024DAF4
68	ITGB2	A0A024DAS2
69	ITGB2	A0A024DAS5
70	ITGB2	A0A024DAT2
71	ITGB2	A0A024DBF0
72	ITGB2	A0A024DBF8
73	ITGB2	A0A024DBG3
74	HLA-B	A0A024F8H3
75	HLA-DRB1	A0A024F8R8
76	HLA-DRB1	A0A024F9R7
77	HLA-A	A0A024J3X2
78	HLA-DRB1	A0A024J4R7
79	HLA-B	A0A024K712
80	PTEN	A0A024QYR6
81	SERPINE1	A0A024QYT5
82	PIM2	A0A024QYW7
83	LGALS9	A0A024QZ02
84	TRAF4	A0A024QZ19
85	LGALS9	A0A024QZ55
86	TRAF4	A0A024QZ59
87	LAT	A0A024QZD6
88	BAX	A0A024QZD7
89	IRF3	A0A024QZE1
90	FLT3LG	A0A024QZH2
91	DBP	A0A024QZH7
92	NCOA4	A0A024QZI5
93	CCDC6	A0A024QZJ7
94	VCL	A0A024QZN4
95	VDAC2	A0A024QZN9
96	SIRT1	A0A024QZQ1
97	VDAC2	A0A024QZT0
98	SERPINB6	A0A024QZT8
99	RIPK1	A0A024QZU0
100	EIF2AK1	A0A024QZU1
101	FST	A0A024QZU6
102	SERPINB6	A0A024QZX3
103	SERPINB6	A0A024QZX5
104	JTV1	A0A024QZY1
105	IL9R	A0A024R039
106	TNFRSF14	A0A024R052
107	SKP2	A0A024R069
108	CSF1	A0A024R0A1
109	TNFRSF4	A0A024R0B2
110	PAK4	A0A024R0J1
111	PAK4	A0A024R0L8
112	FOSB	A0A024R0P6
113	TGFB1	A0A024R0P8
114	PPP5C	A0A024R0Q7
115	ARHGEF1	A0A024R0R1
116	ARAF	A0A024R178
117	ELK1	A0A024R1A7
118	BCR	A0A024R1B9
119	APOL1	A0A024R1G8
120	RAC2	A0A024R1P2
121	APOL1	A0A024R1Q4
122	PDGFB	A0A024R1R5
123	RAB5C	A0A024R1U4
124	JUP	A0A024R1X8
125	PSMD13	A0A024R201
126	PSME3	A0A024R203
127	GNAQ	A0A024R240
128	SYK	A0A024R244
129	SYK	A0A024R273
130	SMAD4	A0A024R274
131	CTSL	A0A024R276
132	SERPINB8	A0A024R2B1
133	BCL2	A0A024R2B3
134	SERPINB5	A0A024R2B6
135	PMAIP1	A0A024R2C2
136	BCL2	A0A024R2C4
137	IL5RA	A0A024R2E8
138	VHL	A0A024R2F2
139	RAB5A	A0A024R2K1
140	CTNNB1	A0A024R2Q3
141	MLH1	A0A024R2S9
142	RHOA	A0A024R324
143	PRKCD	A0A024R328
144	CTSB	A0A024R374
145	MBP	A0A024R384
146	ZBTB16	A0A024R3C6
147	IL18	A0A024R3E0
148	APOA1	A0A024R3E3
149	TIRAP	A0A024R3M4
150	PARP1	A0A024R3T8
151	HSPD1	A0A024R3X4
152	CFLAR	A0A024R3Y3
153	CFLAR	A0A024R3Y4
154	FN1	A0A024R462
155	CHMP2A	A0A024R4S0
156	BIK	A0A024R4X6
157	PAX8	A0A024R4X8
158	IL1F5	A0A024R518
159	PAX8	A0A024R523
160	PAX8	A0A024R524
161	FTH1	A0A024R525
162	IL1RN	A0A024R528
163	PAX8	A0A024R531
164	BAD	A0A024R562
165	CAPN1	A0A024R580
166	CAPN1	A0A024R5A3
167	MAP3K11	A0A024R5E6
168	IL18BP	A0A024R5G2
169	IL18BP	A0A024R5I1
170	IL18BP	A0A024R5M7
171	PAK1	A0A024R5P0
172	GNB5	A0A024R5R9
173	TRPM7	A0A024R5V1
174	GNB5	A0A024R5V3
175	GNB5	A0A024R5Y0
176	SMAD3	A0A024R5Z3
177	RAB11A	A0A024R5Z8
178	NEO1	A0A024R610
179	CORO1A	A0A024R611
180	SPN	A0A024R629
181	EDNRB	A0A024R638
182	EDNRB	A0A024R645
183	MAX	A0A024R682
184	ARG2	A0A024R6A0
185	TRAF3	A0A024R6N1
186	CYLD	A0A024R6Q9
187	MMP2	A0A024R6R4
188	CYLD	A0A024R6T1
189	CBFB	A0A024R6W3
190	CBFB	A0A024R6X2
191	MET	A0A024R728
192	IRF5	A0A024R756
193	MET	A0A024R759
194	CDC37	A0A024R7B7
195	KEAP1	A0A024R7C0
196	TYK2	A0A024R7E4
197	ACP5	A0A024R7F8
198	BST2	A0A024R7H5
199	IL27RA	A0A024R7I8
200	RFXANK	A0A024R7M1
201	JAK3	A0A024R7M7
202	EDG4	A0A024R7M9
203	PIK3R2	A0A024R7N6
204	IFI30	A0A024R7N7
205	RFXANK	A0A024R7P0
206	FGFR4	A0A024R7P8
207	FGFR4	A0A024R7S1
208	RET	A0A024R7S5
209	RET	A0A024R7T1
210	RET	A0A024R7T2
211	CXCL12	A0A024R7W4
212	TCEB1	A0A024R7Y5
213	PDGFA	A0A024R7Z9
214	CARD11	A0A024R854
215	ENG	A0A024R878
216	ABL1	A0A024R8E2
217	CARD9	A0A024R8F1
218	TRAF2	A0A024R8H5
219	CARD9	A0A024R8I4
220	AXIN2	A0A024R8J7
221	MAP2K6	A0A024R8K3
222	GNA13	A0A024R8M0
223	AXIN2	A0A024R8M3
224	FCGR2B	A0A024R8X8
225	SELP	A0A024R8Y9
226	NCF2	A0A024R936
227	FMOD	A0A024R971
228	LAMC1	A0A024R972
229	SDC2	A0A024R9D1
230	FZD6	A0A024R9E9
231	PTK2	A0A024R9H6
232	MYC	A0A024R9L7
233	THBS1	A0A024R9Q1
234	PAK6	A0A024R9Q4
235	RBPSUH	A0A024R9Q8
236	TLR10	A0A024R9W4
237	AHR	A0A024R9Z8
238	ICA1	A0A024RA29
239	PSMA2	A0A024RA52
240	CARD4	A0A024RA73
241	GLI3	A0A024RA92
242	CDC42	A0A024RAA5
243	HSPG2	A0A024RAB6
244	ID3	A0A024RAC4
245	CDC42	A0A024RAE6
246	RALB	A0A024RAG3
247	RUNX3	A0A024RAH4
248	CLEC7A	A0A024RAN9
249	POLK	A0A024RAP4
250	F2R	A0A024RAP7
251	RGMB	A0A024RAS1
252	KRAS	A0A024RAV5
253	ITGA5	A0A024RB01
254	RAB5B	A0A024RB09
255	CDK2	A0A024RB10
256	PTGES3	A0A024RB32
257	CDK2	A0A024RB77
258	CDK4	A0A024RBB6
259	KITLG	A0A024RBC0
260	SOCS2	A0A024RBD2
261	KITLG	A0A024RBF5
262	DCN	A0A024RBG6
263	NFYB	A0A024RBG7
264	CSF2RA	A0A024RBT5
265	PIAS2	A0A024RC49
266	IRF7	A0A024RCA2
267	CD81	A0A024RCB7
268	NUP98	A0A024RCC4
269	IGF2	A0A024RCE6
270	DAXX	A0A024RCS3
271	TAPBP	A0A024RCT1
272	SRPK1	A0A024RCU9
273	PPARD	A0A024RCW6
274	CDKN1A	A0A024RCX5
275	MRPS10	A0A024RD03
276	MAPK14	A0A024RD15
277	NFYA	A0A024RD22
278	NFKBIE	A0A024RD24
279	PIM1	A0A024RD25
280	CCND3	A0A024RD48
281	IL8	A0A024RDA5
282	CXCL2	A0A024RDD9
283	SPP1	A0A024RDE2
284	SPP1	A0A024RDE6
285	SPP1	A0A024RDJ0
286	HMGB1	A0A024RDR0
287	SMAD9	A0A024RDR3
288	LCP1	A0A024RDT4
289	RB1	A0A024RDV3
290	LAMP1	A0A024RDY3
291	TFDP1	A0A024RDY4
292	MAL	A0A024RE11
293	MAL	A0A024RE19
294	ND1	A0A059QB76
295	ND1	A0A059QCS4
296	ND1	A0A059QCY2
297	ND1	A0A059QD90
298	ND1	A0A059QDA5
299	ND1	A0A059QEI7
300	ND1	A0A059QF23
301	COX2	A0A059QFD5
302	ND1	A0A059QFE2
303	ND1	A0A059QHG0
304	ND1	A0A059QHI3
305	ND1	A0A059QHN0
306	ND1	A0A059QHY5
307	COX2	A0A059QI72
308	ND1	A0A059QIA1
309	ND1	A0A059QIL1
310	ND1	A0A059QJ42
311	ND1	A0A059QJ58
312	ND1	A0A059QJF0
313	ND1	A0A059QJL5
314	ND1	A0A059QKK1
315	ND1	A0A059QKS9
316	ND1	A0A059QL72
317	COX2	A0A059QLX8
318	ND1	A0A059QM28
319	COX2	A0A059QM31
320	ND1	A0A059QN62
321	COX2	A0A059QNV4
322	ND1	A0A059QP35
323	COX2	A0A059QPE7
324	COX2	A0A059QPE9
325	COX2	A0A059QPR4
326	COX2	A0A059QPT6
327	COX2	A0A059QPU3
328	ND1	A0A059QPU5
329	COX2	A0A059QPY9
330	ND1	A0A059QPZ9
331	ND1	A0A059QQ34
332	COX2	A0A059QQA7
333	ND1	A0A059QQB4
334	ND1	A0A059QQL5
335	ND1	A0A059QQT1
336	ND1	A0A059QQZ5
337	ND1	A0A059QR22
338	ND1	A0A059QR65
339	ND1	A0A059QRC9
340	ND1	A0A059QRV9
341	COX2	A0A059QS59
342	ND1	A0A059QSN6
343	COX2	A0A059QTV7
344	COX2	A0A059QTW9
345	ND1	A0A059QUY0
346	ND1	A0A059QV06
347	ND1	A0A059QV99
348	COX2	A0A059QVH0
349	ND1	A0A059QWC0
350	ND1	A0A059R071
351	ND1	A0A059R0Q7
352	COX2	A0A059R1T0
353	ND1	A0A059R4W0
354	ND1	A0A059R906
355	ND1	A0A059RDN0
356	ND1	A0A059RF58
357	COX2	A0A059RFY4
358	ND1	A0A059RH65
359	ND1	A0A059RHK8
360	COX2	A0A059RHR2
361	ND1	A0A059RHS4
362	ND1	A0A059RHU5
363	COX2	A0A059RHY7
364	COX2	A0A059RI53
365	COX2	A0A059RI85
366	ND1	A0A059RIF4
367	COX2	A0A059RIK5
368	ND1	A0A059RIN0
369	COX2	A0A059RIQ8
370	ND1	A0A059RIX0
371	ND1	A0A059RIX1
372	COX2	A0A059RIZ2
373	COX2	A0A059RJF0
374	ND1	A0A059RJI0
375	ND1	A0A059RJY0
376	ND1	A0A059RK86
377	ND1	A0A059RKC9
378	ND1	A0A059RKH3
379	COX2	A0A059RKP1
380	ND1	A0A059RKR5
381	COX2	A0A059RKX5
382	COX2	A0A059RLH3
383	ND1	A0A059RLI2
384	ND1	A0A059RLV7
385	ND1	A0A059RM85
386	COX2	A0A059RMK0
387	COX2	A0A059RMS5
388	ND1	A0A059RMY0
389	ND1	A0A059RN67
390	ND1	A0A059RNB9
391	ND1	A0A059RNF0
392	COX2	A0A059RNF8
393	ND1	A0A059RNI5
394	ND1	A0A059RNK2
395	ND1	A0A059RNR7
396	COX2	A0A059RNV8
397	COX2	A0A059RP05
398	ND1	A0A059RP14
399	ND1	A0A059RP72
400	ND1	A0A059RPU0
401	COX2	A0A059RPV8
402	COX2	A0A059RQ10
403	ND1	A0A059RQH8
404	COX2	A0A059RQI1
405	ND1	A0A059RQJ8
406	COX2	A0A059RQQ2
407	COX2	A0A059RQT0
408	COX2	A0A059RR09
409	ND1	A0A059RR41
410	ND1	A0A059RR83
411	COX2	A0A059RRG1
412	COX2	A0A059RRR2
413	ND1	A0A059RRR8
414	ND1	A0A059RS19
415	COX2	A0A059RS76
416	ND1	A0A059RS79
417	ND1	A0A059RSK8
418	COX2	A0A059RSL1
419	COX2	A0A059RTG7
420	ND1	A0A059RTL4
421	COX2	A0A059RTZ6
422	ND1	A0A059RU00
423	ND1	A0A059RU04
424	ND1	A0A059RU99
425	ND1	A0A059RUM7
426	COX2	A0A059RUP9
427	COX2	A0A059RUZ1
428	COX2	A0A059RVU8
429	ND1	A0A059RWN8
430	COX2	A0A059RX67
431	ND1	A0A059RXD5
432	COX2	A0A059RZV1
433	ND1	A0A059S0J3
434	COX2	A0A059S242
435	COX2	A0A059S2S6
436	ND1	A0A059S6Z7
437	COX2	A0A059S8A4
438	COX2	A0A059SAH5
439	DARC	A0A059T9N9
440	DARC	A0A059T9V8
441	DARC	A0A059T9W4
442	DARC	A0A059TA65
443	DARC	A0A059TA67
444	DARC	A0A059TA82
445	HLA-B	A0A059UE51
446	FAK	A0A059VC25
447	HLA-DQB1	A0A059WJG5
448	HLA-DQB1	A0A059WQE7
449	HLA-B	A0A059WRJ1
450	HLA-DQB1	A0A059XNA8
451	HLA-B	A0A060A472
452	HLA-A	A0A060AF62
453	HLA-B	A0A060AJM7
454	HLA-A	A0A060AQ09
455	HLA-A	A0A060CYB7
456	HLA-A	A0A060CZ20
457	HLA-B	A0A060D0Q1
458	HLA-B	A0A060D4A6
459	HLA-B	A0A060D4B3
460	HLA-B	A0A060D4S6
461	HLA-B	A0A060D9N2
462	HLA-B	A0A060D9N8
463	HLA-B	A0A060DAG7
464	HLA-B	A0A060DAH3
465	HLA-A	A0A060GQ71
466	HLA-DQB1	A0A060GQ75
467	HLA-A	A0A060GTH2
468	HLA-B	A0A060GU53
469	HLA-DQB1	A0A060GU55
470	HLA-A	A0A060GVB3
471	HLA-DQB1	A0A060GZE9
472	HLA-A	A0A060H0F8
473	HLA-B	A0A060IP86
474	HLA-B	A0A060N0U0
475	HLA-B	A0A060N2L5
476	HLA-A	A0A060N342
477	HLA-B	A0A060VCP4
478	HLA-A	A0A060VCP5
479	HLA-B	A0A060VCP7
480	HLA-A	A0A060VCP8
481	HLA-A	A0A060VCU0
482	HLA-A	A0A060VCU4
483	HLA-A	A0A060VCV9
484	HLA-A	A0A060VCW6
485	HLA-A	A0A060VCW9
486	HLA-A	A0A060VCX0
487	HLA-A	A0A060VCX2
488	HLA-B	A0A060VCX6
489	HLA-B	A0A060VCY0
490	HLA-A	A0A060VCY5
491	HLA-A	A0A060VCY6
492	HLA-A	A0A060VCY7
493	HLA-A	A0A060VCY8
494	HLA-A	A0A060VCY9
495	HLA-DQB1	A0A060VCZ0
496	HLA-A	A0A060VCZ1
497	HLA-B	A0A060VCZ2
498	HLA-A	A0A060VCZ3
499	HLA-B	A0A060VCZ5
500	HLA-B	A0A060VCZ6
501	HLA-B	A0A060VCZ9
502	HLA-B	A0A060VD02
503	HLA-A	A0A060VD05
504	HLA-A	A0A060VD08
505	HLA-DQB1	A0A060VD09
506	HLA-A	A0A060VD10
507	HLA-B	A0A060VD11
508	HLA-B	A0A060VD13
509	HLA-A	A0A060VD16
510	HLA-B	A0A060VD19
511	HLA-A	A0A060VG17
512	HLA-A	A0A060VG20
513	HLA-A	A0A060VG23
514	HLA-A	A0A060VG36
515	HLA-A	A0A060VG38
516	HLA-A	A0A060VG42
517	HLA-A	A0A060VG47
518	HLA-B	A0A060VG50
519	HLA-B	A0A060VG64
520	HLA-A	A0A060VHC2
521	HLA-B	A0A060VHC7
522	HLA-A	A0A060VHD0
523	HLA-A	A0A060VHD9
524	HLA-A	A0A060VHE9
525	HLA-A	A0A060VHF3
526	HLA-A	A0A060VHF9
527	HLA-B	A0A060VHG3
528	HLA-A	A0A060VHG8
529	HLA-A	A0A060VHJ3
530	HLA-A	A0A061A7U0
531	HLA-B	A0A061CKU3
532	HLA-DRB1	A0A061CLB2
533	HLA-B	A0A061CMV3
534	HLA-A	A0A061CVW2
535	HLA-A	A0A061DD14
536	HLA-A	A0A061DEB5
537	HLA-A	A0A068B103
538	HLA-B	A0A068B107
539	HLA-B	A0A068B112
540	HLA-B	A0A068B116
541	HLA-B	A0A068B2J5
542	HLA-B	A0A068B2K0
543	HLA-B	A0A068B2K5
544	HLA-B	A0A068B2K9
545	HLA-B	A0A068B2X8
546	HLA-B	A0A068B2Y5
547	HLA-B	A0A068B2Z1
548	HLA-A	A0A068B426
549	HLA-B	A0A068B433
550	HLA-B	A0A068B439
551	HLA-B	A0A068B445
552	HLA-A	A0A068B6T4
553	HLA-B	A0A068B6T8
554	HLA-B	A0A068B6U4
555	HLA-B	A0A068B6U8
556	BRCA2	A0A068BC92
557	BRCA2	A0A068BC94
558	BRCA2	A0A068BCA8
559	BRCA2	A0A068BCA9
560	BRCA2	A0A068BCC2
561	BRCA2	A0A068BDS2
562	BRCA2	A0A068BDS6
563	BRCA2	A0A068BDT0
564	BRCA2	A0A068BDU2
565	BRCA2	A0A068BDU4
566	BRCA2	A0A068BDV3
567	BRCA2	A0A068BEU0
568	BRCA2	A0A068BEU4
569	BRCA2	A0A068BEV8
570	BRCA2	A0A068BEW3
571	BRCA2	A0A068BEX2
572	BRCA2	A0A068BFU2
573	BRCA2	A0A068BFU7
574	BRCA2	A0A068BFW6
575	BRCA2	A0A068BFW8
576	BRCA2	A0A068BFX3
577	BRCA2	A0A068BFY4
578	BRCA2	A0A068BI27
579	BRCA2	A0A068BI30
580	BRCA2	A0A068BI47
581	BRCA2	A0A068BI50
582	COX2	A0A068BP29
583	COX2	A0A068BST3
584	COX2	A0A068BTX8
585	COX2	A0A068BY99
586	ND1	A0A068BZL9
587	ND1	A0A068C9Z7
588	HLA-B	A0A068EQF7
589	HLA-A	A0A068ESS8
590	COX2	A0A068IXK4
591	HLA-B	A0A068J6T1
592	EGFR	A0A068JCC9
593	EGFR	A0A068JD88
594	HLA-B	A0A068PCV8
595	HLA-B	A0A068PF82
596	HLA-DRB1	A0A068Q8C6
597	HLA-DRB1	A0A068Q8E6
598	PECAM1	A0A075B727
599	PECAM1	A0A075B728
600	PECAM1	A0A075B737
601	RASSF5	A0A075B763
602	PTPRC	A0A075B788
603	IKBKE	A0A075B7B4
604	CCL5	A0A075B7C5
605	IKBKE	A0A075B7C7
606	IKBKE	A0A075B7D5
607	DARC	A0A075DL39
608	BDKRB2	A0A075E6Y0
609	HLA-DRB1	A0A075M4J2
610	HLA-B	A0A075M4W8
611	HLA-B	A0A075MGT0
612	HLA-DRB1	A0A075QB04
613	ND1	A0A075X6R1
614	ND1	A0A075X6X5
615	ND1	A0A075X7D1
616	ND1	A0A075X7E4
617	ND1	A0A075X7J5
618	COX2	A0A075X8C1
619	ND1	A0A075XDG3
620	ND1	A0A075XDP0
621	HLA-A	A0A076JS26
622	HLA-A	A0A076JT77
623	HLA-DRB1	A0A076JWY8
624	HLA-A	A0A076JXB7
625	HLA-B	A0A076JYD5
626	HLA-A	A0A076L0P9
627	HLA-DQB1	A0A076L4M5
628	HLA-B	A0A076N180
629	HLA-B	A0A076N9H0
630	HLA-A	A0A076V2L0
631	HLA-B	A0A076V2Z0
632	HLA-A	A0A076V371
633	HLA-A	A0A076V5S4
634	HLA-A	A0A076V7U7
635	HLA-A	A0A076VF41
636	HLA-B	A0A076VJD6
637	HLA-B	A0A077B7N4
638	BMP7	A0A077CY02
639	HLA-DQB1	A0A077DBJ4
640	HLA-B	A0A077GYB2
641	HLA-B	A0A077GZU2
642	HLA-B	A0A077H3X4
643	HLA-B	A0A077HBK1
644	HLA-A	A0A077XLA2
645	HLA-DRB1	A0A077XNE3
646	HLA-B	A0A077YF27
647	HLA-A	A0A077YFH3
648	HLA-A	A0A077YIJ7
649	TGFB1	A0A078BBI5
650	HLA-A	A0A078BBY8
651	TGFB1	A0A078BC11
652	TGFB1	A0A078BCH8
653	TGFB1	A0A078BCJ0
654	TGFB1	A0A078BFK3
655	HLA-A	A0A078BNH2
656	HLA-B	A0A078BNN6
657	HLA-A	A0A078BPG3
658	HLA-A	A0A078BRA4
659	HLA-A	A0A078BSN2
660	HLA-B	A0A078K2P5
661	HLA-DRB1	A0A078K598
662	HLA-A	A0A078N1N5
663	HLA-A	A0A078N209
664	TP53	A0A087WT22
665	MCL1	A0A087WT64
666	IL6R	A0A087WTB5
667	NCAM1	A0A087WTE4
668	PTCRA	A0A087WTE9
669	NCAM1	A0A087WTF6
670	FAS	A0A087WTM9
671	FDPS	A0A087WTP2
672	DDB2	A0A087WTQ7
673	NCAM1	A0A087WTR3
674	TMPRSS4	A0A087WTU6
675	SERPINB8	A0A087WTX6
676	NBL1	A0A087WTY6
677	GYPA	A0A087WU29
678	SMAD4	A0A087WUF3
679	PSMB3	A0A087WUL2
680	MYC	A0A087WUS5
681	IKBKG	A0A087WUW6
682	AR	A0A087WUX9
683	PIAS2	A0A087WUY7
684	OSCAR	A0A087WV17
685	DDB2	A0A087WV56
686	NCAM1	A0A087WV75
687	NCAM1	A0A087WVD0
688	FDPS	A0A087WVN4
689	STK4	A0A087WVN8
690	NCAM1	A0A087WVU1
691	PSMB2	A0A087WVV1
692	GNA11	A0A087WVZ3
693	IL17D	A0A087WW17
694	PSMD1	A0A087WW66
695	DDB2	A0A087WW71
696	CHMP2B	A0A087WW88
697	IRF5	A0A087WWA0
698	RET	A0A087WWB1
699	NCAM1	A0A087WWD4
700	NCAM1	A0A087WWJ5
701	IKBKG	A0A087WWQ9
702	IFNA13	A0A087WWS6
703	ALB	A0A087WWT3
704	RUNX1T1	A0A087WWT6
705	TPM3	A0A087WWU8
706	BCL10	A0A087WWW9
707	IL17D	A0A087WWZ4
708	MLH1	A0A087WX20
709	CD83	A0A087WX61
710	CASP9	A0A087WX72
711	NCAM1	A0A087WX77
712	MAP3K14	A0A087WXF1
713	JAG1	A0A087WXH5
714	PSMB3	A0A087WXQ8
715	MITF	A0A087WXU1
716	TP53	A0A087WXZ1
717	PSMB3	A0A087WY10
718	FGFR2	A0A087WY21
719	AKT1	A0A087WY56
720	TAP2	A0A087WYD6
721	APC	A0A087WYF3
722	PTGES3	A0A087WYT3
723	STK4	A0A087WYT4
724	DDB2	A0A087WYT8
725	RXRG	A0A087WZ88
726	ALK	A0A087WZL3
727	CD22	A0A087WZQ4
728	NCAM1	A0A087WZS4
729	PTEN	A0A087X033
730	FDPS	A0A087X090
731	IKBKG	A0A087X0G7
732	GHR	A0A087X0H5
733	TJP1	A0A087X0K9
734	BMPR1A	A0A087X0P8
735	RELA	A0A087X0W8
736	DDB2	A0A087X0X5
737	ITGAX	A0A087X131
738	GHR	A0A087X162
739	SLC11A1	A0A087X181
740	IKBKG	A0A087X1B1
741	AR	A0A087X1B6
742	CD40	A0A087X1D0
743	FDPS	A0A087X1D8
744	JAG1	A0A087X1E8
745	HNRNPUL1	A0A087X1I2
746	IKBKG	A0A087X1K7
747	SERPINB6	A0A087X1N8
748	TP53	A0A087X1Q1
749	OSCAR	A0A087X1R2
750	THSD4	A0A087X1T0
751	NCAM1	A0A087X1V2
752	NCF1	A0A087X1W0
753	PSME2	A0A087X1Z3
754	PIK3R2	A0A087X257
755	SRSF3	A0A087X2D0
756	FGFR2	A0A087X2D1
757	SLC11A1	A0A087X2D6
758	APC	A0A087X2F3
759	RORA	A0A087X2G0
760	PSMC6	A0A087X2I1
761	PSMB6	A0A087X2I4
762	CIITA	A0A087X2I7
763	HLA-DQB1	A0A088DLH7
764	HLA-DQB1	A0A088DN13
765	HLA-B	A0A088MI97
766	HLA-B	A0A088SX10
767	CCR5	A0A089G3J8
768	CCR5	A0A089G3K0
769	CCR5	A0A089G3K4
770	CCR5	A0A089G3L9
771	CCR5	A0A089G3M1
772	CCR5	A0A089G3M5
773	CCR5	A0A089G3M8
774	CCR5	A0A089G3N1
775	CCR5	A0A089G3N4
776	CCR5	A0A089G3P0
777	CCR5	A0A089G3P4
778	CCR5	A0A089G5M8
779	CCR5	A0A089G5N2
780	CCR5	A0A089G5Q8
781	CCR5	A0A089G5R2
782	CCR5	A0A089G5R6
783	CCR5	A0A089G5R7
784	CCR5	A0A089G5S5
785	CCR5	A0A089G5S8
786	CCR5	A0A089G6P0
787	CCR5	A0A089G6P4
788	CCR5	A0A089G6Q9
789	CCR5	A0A089G6R5
790	CCR5	A0A089G6R7
791	CCR5	A0A089G6S0
792	CCR5	A0A089G6S3
793	CCR5	A0A089G6S6
794	CCR5	A0A089G6S9
795	CCR5	A0A089G7F7
796	CCR5	A0A089G7G0
797	CCR5	A0A089G7G7
798	CCR5	A0A089G7G9
799	CCR5	A0A089G7H7
800	CCR5	A0A089G7H9
801	CCR5	A0A089G7J0
802	CCR5	A0A089G7J3
803	CCR5	A0A089G7J6
804	HLA-DRB1	A0A089H0Q7
805	CCR5	A0A089H947
806	CCR5	A0A089H953
807	CCR5	A0A089H958
808	CCR5	A0A089H960
809	CCR5	A0A089H970
810	CCR5	A0A089H974
811	CCR5	A0A089H976
812	CCR5	A0A089H978
813	CCR5	A0A089H983
814	CCR5	A0A089H987
815	CCR5	A0A089H989
816	CCR5	A0A089H9A2
817	HLA-B	A0A089PAU6
818	IL18R1	A0A089VIW4
819	IL18R1	A0A089VKP9
820	HLA-A	A0A090CXP3
821	HLA-B	A0A090D867
822	HLA-A	A0A090D8A2
823	HLA-B	A0A090DD11
824	HLA-A	A0A090GS47
825	HLA-B	A0A090HQQ9
826	HLA-DRB1	A0A090JX86
827	HLA-A	A0A090JY51
828	HLA-B	A0A090K2C7
829	HLA-B	A0A090KEW9
830	HLA-A	A0A090KEX7
831	HLA-DQB1	A0A090KEY2
832	HLA-B	A0A090KF41
833	HLA-B	A0A090KFR2
834	HLA-A	A0A090KFS3
835	HLA-B	A0A090KFX9
836	HLA-DQB1	A0A090KFZ1
837	HLA-DRB1	A0A090KI61
838	HLA-DRB1	A0A090KI66
839	HLA-A	A0A090KI70
840	HLA-DRB1	A0A090KJ16
841	HLA-DRB1	A0A090KJ20
842	HLA-B	A0A090KJ24
843	HLA-A	A0A090KKC3
844	HLA-DQB1	A0A090KKD6
845	HLA-DQB1	A0A090KKE5
846	HLA-A	A0A090KKK5
847	HLA-DQB1	A0A090KKL2
848	HLA-B	A0A090KM51
849	HLA-B	A0A090KM56
850	HLA-B	A0A090KME8
851	HLA-DRB1	A0A090KNI6
852	HLA-DRB1	A0A090KNI9
853	HLA-DRB1	A0A090KQC0
854	HLA-DRB1	A0A090KQC4
855	HLA-DRB1	A0A090KQC9
856	HLA-B	A0A090LXA5
857	HLA-A	A0A090MEX8
858	HLA-A	A0A090MF36
859	HLA-DRB1	A0A090MHY8
860	HLA-DRB1	A0A090MHZ3
861	CUL1	A0A090N7U0
862	NOS3	A0A090N8H8
863	RHEB	A0A090N900
864	VCL	A0A096LPE1
865	ND1	A0A096VZ96
866	ND1	A0A096W2C4
867	ND1	A0A096WB51
868	ND1	A0A096WDG5
869	ND1	A0A096WG04
870	ND1	A0A096WL34
871	ND1	A0A096WM16
872	ND1	A0A096WT46
873	HLA-DRB1	A0A096XJR4
874	HLA-A	A0A096XJR7
875	HLA-DRB1	A0A096XJS0
876	HLA-A	A0A096XJU1
877	ND1	A0A096YCA7
878	ND1	A0A096ZZZ8
879	ALK	A0A097F6U9
880	HLA-DRB1	A0A097NUR6
881	FLT4	A0A097NUS3
882	HLA-DRB1	A0A097P796
883	HLA-B	A0A097PEB8
884	HLA-A	A0A097PED7
885	BMP4	A0A097PIE4
886	BMP4	A0A097PIG0
887	ND1	A0A097PVF1
888	ND1	A0A097PVP0
889	ND1	A0A097PVV2
890	ND1	A0A097PW36
891	ND1	A0A097PWD6
892	COX2	A0A097PWR7
893	COX2	A0A097PWY7
894	ND1	A0A097PX64
895	ND1	A0A097PX89
896	COX2	A0A097PX98
897	ND1	A0A097PXL7
898	COX2	A0A097PYA5
899	ND1	A0A097PZ19
900	ND1	A0A097PZK0
901	ND1	A0A097PZK9
902	ND1	A0A097PZW3
903	COX2	A0A097Q0T5
904	ND1	A0A097Q7J7
905	ND1	A0A097Q823
906	ND1	A0A097QBR8
907	COX2	A0A097QC07
908	ND1	A0A097QC34
909	ND1	A0A097QG33
910	HLA-B	A0A097ZQV5
911	HLA-DRB1	A0A098CM30
912	HLA-A	A0A098F6N4
913	HLA-DRB1	A0A098GK79
914	HLA-B	A0A098GY48
915	LAMA4	A0A0A0MQS9
916	FGF2	A0A0A0MQV6
917	KSR1	A0A0A0MQW1
918	NCR1	A0A0A0MQZ0
919	VDAC2	A0A0A0MR02
920	GNAS	A0A0A0MR13
921	OSCAR	A0A0A0MR14
922	FGFR2	A0A0A0MR25
923	VEGFA	A0A0A0MR43
924	NCR1	A0A0A0MR94
925	HNRNPUL1	A0A0A0MRA5
926	BCL2L11	A0A0A0MRE7
927	OSCAR	A0A0A0MRF2
928	MAP2K6	A0A0A0MRF7
929	APP	A0A0A0MRG2
930	CASP7	A0A0A0MRL7
931	VEGFA	A0A0A0MRQ4
932	IL15RA	A0A0A0MS77
933	PIAS2	A0A0A0MS92
934	ADCY3	A0A0A0MSC1
935	PDGFA	A0A0A0MSC4
936	AGTR1	A0A0A0MSE3
937	VEGFA	A0A0A0MSH5
938	VEGFA	A0A0A0MSH7
939	VEGFA	A0A0A0MSI7
940	MYD88	A0A0A0MSI9
941	RFX5	A0A0A0MSM9
942	ZMYM4	A0A0A0MSN3
943	ACE	A0A0A0MSN4
944	RFX5	A0A0A0MSQ2
945	CALCR	A0A0A0MSQ7
946	RUNX1T1	A0A0A0MSU1
947	C1QB	A0A0A0MSV6
948	TAPBP	A0A0A0MSV9
949	NFYC	A0A0A0MT00
950	RFX5	A0A0A0MT34
951	TAPBP	A0A0A0MT98
952	VEGFA	A0A0A0MTB2
953	LAMA4	A0A0A0MTC7
954	IL7	A0A0A0MTG5
955	SLC11A1	A0A0A0MTL3
956	SKP2	A0A0A0MTL5
957	TCF7L2	A0A0A0MTL7
958	CUL2	A0A0A0MTN0
959	IL12RB2	A0A0A0MTN7
960	RGMA	A0A0A0MTQ4
961	CTAG1A	A0A0A0MTT5
962	NCR1	A0A0A0MTU0
963	IL6ST	A0A0A0N0L2
964	IL6ST	A0A0A0N0L5
965	JAK1	A0A0A0N0M2
966	CNTFR	A0A0A0N0N2
967	ND1	A0A0A0PJK5
968	ND1	A0A0A0QRV8
969	HLA-B	A0A0A0R1L3
970	HLA-DRB1	A0A0A0RD54
971	HLA-DRB1	A0A0A0REP8
972	TP53	A0A0A0U7X4
973	HLA-DRB1	A0A0A0WAE1
974	HLA-DRB1	A0A0A0WAE5
975	HLA-DRB1	A0A0A0WB88
976	HLA-DRB1	A0A0A0WB92
977	HLA-DRB1	A0A0A0WC87
978	HLA-DRB1	A0A0A0WC94
979	HLA-DRB1	A0A0A0WDY3
980	HLA-DRB1	A0A0A0WDY8
981	HLA-DRB1	A0A0A0WDZ3
982	HLA-DRB1	A0A0A0WGI7
983	HLA-DRB1	A0A0A0WGJ3
984	HLA-B	A0A0A0YKE9
985	HLA-A	A0A0A0YLW6
986	HLA-B	A0A0A0YP92
987	HLA-DRB1	A0A0A0YRG7
988	HLA-A	A0A0A1E6D6
989	HLA-DQB1	A0A0A1E7F7
990	HLA-B	A0A0A1E850
991	HLA-DQB1	A0A0A1E8V7
992	HLA-DQB1	A0A0A1E929
993	CD36	A0A0A1EAI1
994	HLA-A	A0A0A1EAW8
995	CD36	A0A0A1ED81
996	HLA-B	A0A0A1EDG2
997	ND1	A0A0A1EKI0
998	GYPA	A0A0A1EPM9
999	HLA-B	A0A0A1GK28
1000	HLA-B	A0A0A1GPV2
1001	HLA-DRB1	A0A0A1I7H4
1002	HLA-DRB1	A0A0A1I7H5
1003	HLA-DRB1	A0A0A1I7H6
1004	HLA-DRB1	A0A0A1I7P0
1005	HLA-DRB1	A0A0A1I7P2
1006	HLA-DRB1	A0A0A1I8N2
1007	HLA-DRB1	A0A0A1I8N5
1008	HLA-DRB1	A0A0A1I8N6
1009	HLA-DRB1	A0A0A1I9Q7
1010	HLA-DRB1	A0A0A1IBA8
1011	HLA-DRB1	A0A0A1IBB2
1012	HLA-DRB1	A0A0A1IBB5
1013	HLA-DRB1	A0A0A1ITX8
1014	HLA-A	A0A0A1IX34
1015	HLA-DRB1	A0A0A1IX95
1016	HLA-DRB1	A0A0A7C3A8
1017	HLA-DRB1	A0A0A7C3B2
1018	HLA-DRB1	A0A0A7C3B6
1019	HLA-DRB1	A0A0A7C3C0
1020	HLA-DRB1	A0A0A7C3C1
1021	HLA-DRB1	A0A0A7C3C4
1022	HLA-DRB1	A0A0A7C3C5
1023	HLA-DRB1	A0A0A7C3C8
1024	HLA-DRB1	A0A0A7C3D0
1025	HLA-DRB1	A0A0A7C3D3
1026	HLA-DRB1	A0A0A7C3D5
1027	HLA-DRB1	A0A0A7C3D8
1028	HLA-DRB1	A0A0A7C3E0
1029	HLA-DRB1	A0A0A7C3E3
1030	HLA-DRB1	A0A0A7C3E6
1031	HLA-DRB1	A0A0A7C3E9
1032	HLA-DRB1	A0A0A7C3F1
1033	HLA-DRB1	A0A0A7C3F5
1034	HLA-DRB1	A0A0A7C3F6
1035	HLA-DRB1	A0A0A7C3G1
1036	HLA-DRB1	A0A0A7C3G2
1037	HLA-DRB1	A0A0A7C3G7
1038	HLA-DRB1	A0A0A7C3G9
1039	HLA-DRB1	A0A0A7C3H3
1040	HLA-DRB1	A0A0A7C3H6
1041	HLA-DRB1	A0A0A7C3H9
1042	HLA-DRB1	A0A0A7C3I1
1043	HLA-DRB1	A0A0A7C3I5
1044	HLA-DRB1	A0A0A7C3I7
1045	HLA-DRB1	A0A0A7C3J1
1046	HLA-DRB1	A0A0A7C3J2
1047	HLA-DRB1	A0A0A7C3J6
1048	HLA-DRB1	A0A0A7C3J8
1049	HLA-DRB1	A0A0A7C3K2
1050	HLA-DRB1	A0A0A7C3K3
1051	HLA-DRB1	A0A0A7C3K8
1052	HLA-DRB1	A0A0A7C3L2
1053	HLA-DRB1	A0A0A7C3L8
1054	HLA-DRB1	A0A0A7C3M0
1055	HLA-A	A0A0A7C3M7
1056	HLA-A	A0A0A7C3M9
1057	HLA-A	A0A0A7C3N2
1058	HLA-A	A0A0A7C3N4
1059	HLA-DRB1	A0A0A7C3N5
1060	HLA-A	A0A0A7C3N7
1061	HLA-A	A0A0A7C3N9
1062	HLA-A	A0A0A7C3P2
1063	HLA-A	A0A0A7C3P3
1064	HLA-A	A0A0A7C3P5
1065	HLA-A	A0A0A7C3P7
1066	HLA-A	A0A0A7C3P8
1067	HLA-A	A0A0A7C3Q0
1068	HLA-A	A0A0A7C3Q1
1069	HLA-A	A0A0A7C3Q3
1070	HLA-A	A0A0A7C3Q5
1071	HLA-A	A0A0A7C3Q6
1072	HLA-A	A0A0A7C3Q8
1073	HLA-A	A0A0A7C3R0
1074	HLA-A	A0A0A7C3R2
1075	HLA-A	A0A0A7C3R3
1076	HLA-A	A0A0A7C3R4
1077	HLA-A	A0A0A7C3R6
1078	HLA-A	A0A0A7C3R8
1079	HLA-A	A0A0A7C3R9
1080	HLA-A	A0A0A7C3S1
1081	HLA-A	A0A0A7C3S2
1082	HLA-A	A0A0A7C3S3
1083	HLA-A	A0A0A7C3S5
1084	HLA-A	A0A0A7C3S8
1085	HLA-A	A0A0A7C3S9
1086	HLA-A	A0A0A7C3T1
1087	HLA-A	A0A0A7C3T3
1088	HLA-A	A0A0A7C3T5
1089	HLA-A	A0A0A7C3T7
1090	HLA-A	A0A0A7C3T9
1091	HLA-A	A0A0A7C3U1
1092	HLA-A	A0A0A7C3U3
1093	HLA-A	A0A0A7C3U6
1094	HLA-A	A0A0A7C3U7
1095	HLA-A	A0A0A7C3U9
1096	HLA-A	A0A0A7C3V2
1097	HLA-A	A0A0A7C3V4
1098	HLA-A	A0A0A7C3V6
1099	HLA-A	A0A0A7C3V9
1100	HLA-A	A0A0A7C3W0
1101	HLA-DRB1	A0A0A7C3W1
1102	HLA-A	A0A0A7C3W3
1103	HLA-A	A0A0A7C3W4
1104	HLA-A	A0A0A7C3W7
1105	HLA-A	A0A0A7C3W8
1106	HLA-DRB1	A0A0A7C3X0
1107	HLA-A	A0A0A7C3X2
1108	HLA-A	A0A0A7C3X3
1109	HLA-A	A0A0A7C3X6
1110	HLA-DRB1	A0A0A7C3X7
1111	HLA-A	A0A0A7C3X8
1112	HLA-A	A0A0A7C3Y0
1113	HLA-A	A0A0A7C3Y2
1114	HLA-DRB1	A0A0A7C3Y3
1115	HLA-A	A0A0A7C3Y5
1116	HLA-A	A0A0A7C3Y6
1117	HLA-A	A0A0A7C3Y8
1118	HLA-DRB1	A0A0A7C3Z0
1119	HLA-A	A0A0A7C3Z1
1120	HLA-A	A0A0A7C3Z2
1121	HLA-A	A0A0A7C3Z5
1122	HLA-A	A0A0A7C3Z6
1123	HLA-DRB1	A0A0A7C3Z8
1124	HLA-A	A0A0A7C400
1125	HLA-A	A0A0A7C401
1126	HLA-A	A0A0A7C403
1127	HLA-DRB1	A0A0A7C404
1128	HLA-A	A0A0A7C406
1129	HLA-A	A0A0A7C408
1130	HLA-B	A0A0A7C409
1131	HLA-DRB1	A0A0A7C412
1132	HLA-A	A0A0A7C413
1133	HLA-B	A0A0A7C414
1134	HLA-A	A0A0A7C417
1135	HLA-DRB1	A0A0A7C418
1136	HLA-B	A0A0A7C419
1137	HLA-A	A0A0A7C421
1138	HLA-B	A0A0A7C423
1139	HLA-A	A0A0A7C425
1140	HLA-DRB1	A0A0A7C426
1141	HLA-B	A0A0A7C427
1142	HLA-B	A0A0A7C428
1143	HLA-DRB1	A0A0A7C431
1144	HLA-B	A0A0A7C432
1145	HLA-B	A0A0A7C433
1146	HLA-B	A0A0A7C436
1147	HLA-B	A0A0A7C437
1148	HLA-DRB1	A0A0A7C439
1149	HLA-B	A0A0A7C440
1150	HLA-B	A0A0A7C441
1151	HLA-B	A0A0A7C444
1152	HLA-B	A0A0A7C445
1153	HLA-DRB1	A0A0A7C446
1154	HLA-B	A0A0A7C449
1155	HLA-B	A0A0A7C450
1156	HLA-DRB1	A0A0A7C452
1157	HLA-B	A0A0A7C453
1158	HLA-B	A0A0A7C454
1159	HLA-B	A0A0A7C457
1160	HLA-B	A0A0A7C458
1161	HLA-DRB1	A0A0A7C460
1162	HLA-B	A0A0A7C462
1163	HLA-B	A0A0A7C463
1164	HLA-B	A0A0A7C465
1165	HLA-B	A0A0A7C466
1166	HLA-DRB1	A0A0A7C468
1167	HLA-B	A0A0A7C470
1168	HLA-B	A0A0A7C471
1169	HLA-DRB1	A0A0A7C474
1170	HLA-B	A0A0A7C475
1171	HLA-B	A0A0A7C476
1172	HLA-B	A0A0A7C479
1173	HLA-DRB1	A0A0A7C480
1174	HLA-B	A0A0A7C481
1175	HLA-B	A0A0A7C483
1176	HLA-B	A0A0A7C485
1177	HLA-DRB1	A0A0A7C487
1178	HLA-B	A0A0A7C488
1179	HLA-B	A0A0A7C489
1180	HLA-B	A0A0A7C492
1181	HLA-DRB1	A0A0A7C493
1182	HLA-B	A0A0A7C494
1183	HLA-B	A0A0A7C497
1184	HLA-B	A0A0A7C498
1185	HLA-B	A0A0A7C4A0
1186	HLA-B	A0A0A7C4A1
1187	HLA-B	A0A0A7C4A3
1188	HLA-B	A0A0A7C4A4
1189	HLA-B	A0A0A7C4A7
1190	HLA-B	A0A0A7C4A9
1191	HLA-DRB1	A0A0A7C4B0
1192	HLA-B	A0A0A7C4B2
1193	HLA-B	A0A0A7C4B4
1194	HLA-B	A0A0A7C4B5
1195	HLA-B	A0A0A7C4B8
1196	HLA-A	A0A0A7C4B9
1197	HLA-B	A0A0A7C4C0
1198	HLA-B	A0A0A7C4C1
1199	HLA-A	A0A0A7C4C4
1200	HLA-A	A0A0A7C4C5
1201	HLA-B	A0A0A7C4C6
1202	HLA-B	A0A0A7C4C7
1203	HLA-A	A0A0A7C4C9
1204	HLA-B	A0A0A7C4D1
1205	HLA-B	A0A0A7C4D2
1206	HLA-A	A0A0A7C4D3
1207	HLA-A	A0A0A7C4D6
1208	HLA-B	A0A0A7C4D7
1209	HLA-B	A0A0A7C4D8
1210	HLA-A	A0A0A7C4E0
1211	HLA-B	A0A0A7C4E1
1212	HLA-A	A0A0A7C4E2
1213	HLA-B	A0A0A7C4E4
1214	HLA-A	A0A0A7C4E6
1215	HLA-B	A0A0A7C4E7
1216	HLA-B	A0A0A7C4E8
1217	HLA-A	A0A0A7C4E9
1218	HLA-A	A0A0A7C4F2
1219	HLA-B	A0A0A7C4F3
1220	HLA-B	A0A0A7C4F4
1221	HLA-A	A0A0A7C4F5
1222	HLA-A	A0A0A7C4F8
1223	HLA-B	A0A0A7C4F9
1224	HLA-B	A0A0A7C4G0
1225	HLA-A	A0A0A7C4G2
1226	HLA-A	A0A0A7C4G4
1227	HLA-B	A0A0A7C4G5
1228	HLA-B	A0A0A7C4G6
1229	HLA-A	A0A0A7C4G8
1230	HLA-B	A0A0A7C4H0
1231	HLA-A	A0A0A7C4H1
1232	HLA-B	A0A0A7C4H2
1233	HLA-A	A0A0A7C4H4
1234	HLA-B	A0A0A7C4H5
1235	HLA-B	A0A0A7C4H7
1236	HLA-A	A0A0A7C4H8
1237	HLA-B	A0A0A7C4I0
1238	HLA-A	A0A0A7C4I1
1239	HLA-DRB1	A0A0A7C4I2
1240	HLA-B	A0A0A7C4I3
1241	HLA-A	A0A0A7C4I4
1242	HLA-B	A0A0A7C4I6
1243	HLA-DRB1	A0A0A7C4I7
1244	HLA-A	A0A0A7C4I8
1245	HLA-B	A0A0A7C4I9
1246	HLA-A	A0A0A7C4J0
1247	HLA-B	A0A0A7C4J1
1248	HLA-B	A0A0A7C4J3
1249	HLA-DRB1	A0A0A7C4J4
1250	HLA-A	A0A0A7C4J5
1251	HLA-B	A0A0A7C4J6
1252	HLA-A	A0A0A7C4J7
1253	HLA-DRB1	A0A0A7C4K0
1254	HLA-B	A0A0A7C4K1
1255	HLA-A	A0A0A7C4K2
1256	HLA-A	A0A0A7C4K5
1257	HLA-DRB1	A0A0A7C4K6
1258	HLA-B	A0A0A7C4K7
1259	HLA-A	A0A0A7C4K8
1260	HLA-A	A0A0A7C4L1
1261	HLA-B	A0A0A7C4L2
1262	HLA-DRB1	A0A0A7C4L3
1263	HLA-A	A0A0A7C4L4
1264	HLA-A	A0A0A7C4L8
1265	HLA-DRB1	A0A0A7C4L9
1266	HLA-A	A0A0A7C4M1
1267	HLA-A	A0A0A7C4M4
1268	HLA-DRB1	A0A0A7C4M5
1269	HLA-A	A0A0A7C4M9
1270	HLA-A	A0A0A7C4N1
1271	HLA-DRB1	A0A0A7C4N2
1272	HLA-B	A0A0A7C4N5
1273	HLA-DRB1	A0A0A7C4N7
1274	HLA-B	A0A0A7C4N9
1275	HLA-B	A0A0A7C4P1
1276	HLA-DRB1	A0A0A7C4P3
1277	HLA-B	A0A0A7C4P6
1278	HLA-B	A0A0A7C4P8
1279	HLA-DRB1	A0A0A7C4Q0
1280	HLA-B	A0A0A7C4Q2
1281	HLA-DRB1	A0A0A7C4Q6
1282	HLA-B	A0A0A7C4Q7
1283	HLA-B	A0A0A7C4R0
1284	HLA-DRB1	A0A0A7C4R2
1285	HLA-B	A0A0A7C4R3
1286	HLA-B	A0A0A7C4R7
1287	HLA-DRB1	A0A0A7C4R8
1288	HLA-B	A0A0A7C4S1
1289	HLA-DRB1	A0A0A7C4S3
1290	HLA-B	A0A0A7C4S6
1291	HLA-B	A0A0A7C4S8
1292	HLA-DRB1	A0A0A7C4T1
1293	HLA-B	A0A0A7C4T2
1294	HLA-B	A0A0A7C4T6
1295	HLA-DRB1	A0A0A7C4T7
1296	HLA-B	A0A0A7C4T8
1297	HLA-B	A0A0A7C4U2
1298	HLA-DRB1	A0A0A7C4U3
1299	HLA-B	A0A0A7C4U6
1300	HLA-B	A0A0A7C4U9
1301	HLA-B	A0A0A7C4V2
1302	HLA-B	A0A0A7C4V6
1303	HLA-B	A0A0A7C4V9
1304	HLA-DRB1	A0A0A7C4W1
1305	HLA-B	A0A0A7C4W3
1306	HLA-B	A0A0A7C4W6
1307	HLA-A	A0A0A7C4W8
1308	HLA-DRB1	A0A0A7C4W9
1309	HLA-A	A0A0A7C4X0
1310	HLA-B	A0A0A7C4X1
1311	HLA-A	A0A0A7C4X2
1312	HLA-B	A0A0A7C4X4
1313	HLA-DRB1	A0A0A7C4X5
1314	HLA-A	A0A0A7C4X6
1315	HLA-A	A0A0A7C4X7
1316	HLA-B	A0A0A7C4X9
1317	HLA-DRB1	A0A0A7C4Y0
1318	HLA-A	A0A0A7C4Y2
1319	HLA-A	A0A0A7C4Y3
1320	HLA-B	A0A0A7C4Y4
1321	HLA-A	A0A0A7C4Y6
1322	HLA-DRB1	A0A0A7C4Y7
1323	HLA-A	A0A0A7C4Y8
1324	HLA-B	A0A0A7C4Y9
1325	HLA-A	A0A0A7C4Z0
1326	HLA-DRB1	A0A0A7C4Z1
1327	HLA-B	A0A0A7C4Z2
1328	HLA-A	A0A0A7C4Z4
1329	HLA-A	A0A0A7C4Z6
1330	HLA-B	A0A0A7C4Z7
1331	HLA-DRB1	A0A0A7C4Z8
1332	HLA-A	A0A0A7C4Z9
1333	HLA-A	A0A0A7C502
1334	HLA-B	A0A0A7C503
1335	HLA-A	A0A0A7C505
1336	HLA-DRB1	A0A0A7C506
1337	HLA-B	A0A0A7C508
1338	HLA-A	A0A0A7C510
1339	HLA-A	A0A0A7C512
1340	HLA-DRB1	A0A0A7C513
1341	HLA-B	A0A0A7C515
1342	HLA-A	A0A0A7C516
1343	HLA-B	A0A0A7C518
1344	HLA-A	A0A0A7C520
1345	HLA-DRB1	A0A0A7C521
1346	HLA-A	A0A0A7C524
1347	HLA-B	A0A0A7C525
1348	HLA-DRB1	A0A0A7C528
1349	HLA-A	A0A0A7C529
1350	HLA-B	A0A0A7C532
1351	HLA-A	A0A0A7C533
1352	HLA-DRB1	A0A0A7C538
1353	HLA-A	A0A0A7C539
1354	HLA-B	A0A0A7C540
1355	HLA-A	A0A0A7C543
1356	HLA-B	A0A0A7C546
1357	HLA-DRB1	A0A0A7C547
1358	HLA-A	A0A0A7C548
1359	HLA-A	A0A0A7C551
1360	HLA-B	A0A0A7C552
1361	HLA-DRB1	A0A0A7C555
1362	HLA-A	A0A0A7C557
1363	HLA-A	A0A0A7C561
1364	HLA-DRB1	A0A0A7C564
1365	HLA-A	A0A0A7C565
1366	HLA-A	A0A0A7C570
1367	HLA-DRB1	A0A0A7C572
1368	HLA-A	A0A0A7C576
1369	HLA-A	A0A0A7C579
1370	HLA-DRB1	A0A0A7C581
1371	HLA-A	A0A0A7C584
1372	HLA-DRB1	A0A0A7C589
1373	HLA-A	A0A0A7C590
1374	HLA-A	A0A0A7C594
1375	HLA-DRB1	A0A0A7C597
1376	HLA-B	A0A0A7C599
1377	HLA-B	A0A0A7C5A4
1378	HLA-DRB1	A0A0A7C5A5
1379	HLA-B	A0A0A7C5A8
1380	HLA-DRB1	A0A0A7C5B2
1381	HLA-B	A0A0A7C5B3
1382	HLA-B	A0A0A7C5B8
1383	HLA-B	A0A0A7C5C2
1384	HLA-B	A0A0A7C5C6
1385	HLA-B	A0A0A7C5D0
1386	HLA-DRB1	A0A0A7C5D1
1387	HLA-B	A0A0A7C5D4
1388	HLA-B	A0A0A7C5D8
1389	HLA-B	A0A0A7C5E2
1390	HLA-A	A0A0A7C5E4
1391	HLA-B	A0A0A7C5E7
1392	HLA-A	A0A0A7C5E9
1393	HLA-B	A0A0A7C5F1
1394	HLA-A	A0A0A7C5F4
1395	HLA-A	A0A0A7C5F6
1396	HLA-B	A0A0A7C5F7
1397	HLA-A	A0A0A7C5G0
1398	HLA-B	A0A0A7C5G3
1399	HLA-A	A0A0A7C5G4
1400	HLA-A	A0A0A7C5G6
1401	HLA-B	A0A0A7C5G8
1402	HLA-A	A0A0A7C5H1
1403	HLA-B	A0A0A7C5H3
1404	HLA-A	A0A0A7C5H4
1405	HLA-A	A0A0A7C5H8
1406	HLA-B	A0A0A7C5H9
1407	HLA-A	A0A0A7C5I2
1408	HLA-B	A0A0A7C5I4
1409	HLA-A	A0A0A7C5I5
1410	HLA-A	A0A0A7C5I8
1411	HLA-B	A0A0A7C5J1
1412	HLA-A	A0A0A7C5J3
1413	HLA-A	A0A0A7C5J5
1414	HLA-B	A0A0A7C5J6
1415	HLA-A	A0A0A7C5K0
1416	HLA-B	A0A0A7C5K2
1417	HLA-A	A0A0A7C5K4
1418	HLA-A	A0A0A7C5K7
1419	HLA-B	A0A0A7C5K8
1420	HLA-A	A0A0A7C5L1
1421	HLA-B	A0A0A7C5L3
1422	HLA-A	A0A0A7C5L4
1423	HLA-A	A0A0A7C5L7
1424	HLA-B	A0A0A7C5L8
1425	HLA-A	A0A0A7C5M0
1426	HLA-B	A0A0A7C5M2
1427	HLA-A	A0A0A7C5M4
1428	HLA-B	A0A0A7C5M6
1429	HLA-A	A0A0A7C5M8
1430	HLA-A	A0A0A7C5N1
1431	HLA-B	A0A0A7C5N3
1432	HLA-A	A0A0A7C5N4
1433	HLA-B	A0A0A7C5N7
1434	HLA-A	A0A0A7C5N8
1435	HLA-A	A0A0A7C5P1
1436	HLA-B	A0A0A7C5P2
1437	HLA-A	A0A0A7C5P5
1438	HLA-B	A0A0A7C5P8
1439	HLA-A	A0A0A7C5Q0
1440	HLA-A	A0A0A7C5Q4
1441	HLA-B	A0A0A7C5Q5
1442	HLA-A	A0A0A7C5Q9
1443	HLA-B	A0A0A7C5R1
1444	HLA-A	A0A0A7C5R3
1445	HLA-B	A0A0A7C5R6
1446	HLA-A	A0A0A7C5R7
1447	HLA-A	A0A0A7C5S2
1448	HLA-B	A0A0A7C5S3
1449	HLA-B	A0A0A7C5S7
1450	HLA-B	A0A0A7C5S9
1451	HLA-DQB1	A0A0A7C5T1
1452	HLA-B	A0A0A7C5T2
1453	HLA-B	A0A0A7C5T5
1454	HLA-B	A0A0A7C5T6
1455	HLA-DQB1	A0A0A7C5T7
1456	HLA-B	A0A0A7C5U1
1457	HLA-B	A0A0A7C5U2
1458	HLA-DQB1	A0A0A7C5U3
1459	HLA-B	A0A0A7C5U6
1460	HLA-B	A0A0A7C5U8
1461	HLA-DQB1	A0A0A7C5U9
1462	HLA-B	A0A0A7C5V1
1463	HLA-B	A0A0A7C5V3
1464	HLA-B	A0A0A7C5V5
1465	HLA-DQB1	A0A0A7C5V6
1466	HLA-DQB1	A0A0A7C5V7
1467	HLA-B	A0A0A7C5V9
1468	HLA-DQB1	A0A0A7C5W2
1469	HLA-DQB1	A0A0A7C5W3
1470	HLA-B	A0A0A7C5W4
1471	HLA-DQB1	A0A0A7C5W7
1472	HLA-DQB1	A0A0A7C5W8
1473	HLA-B	A0A0A7C5W9
1474	HLA-DQB1	A0A0A7C5X2
1475	HLA-DQB1	A0A0A7C5X3
1476	HLA-B	A0A0A7C5X5
1477	HLA-B	A0A0A7C5X7
1478	HLA-DQB1	A0A0A7C5X8
1479	HLA-DQB1	A0A0A7C5X9
1480	HLA-B	A0A0A7C5Y2
1481	HLA-DQB1	A0A0A7C5Y4
1482	HLA-DQB1	A0A0A7C5Y6
1483	HLA-B	A0A0A7C5Y8
1484	HLA-DQB1	A0A0A7C5Y9
1485	HLA-DQB1	A0A0A7C5Z2
1486	HLA-B	A0A0A7C5Z3
1487	HLA-DQB1	A0A0A7C5Z5
1488	HLA-DQB1	A0A0A7C5Z6
1489	HLA-B	A0A0A7C5Z8
1490	HLA-B	A0A0A7C600
1491	HLA-DQB1	A0A0A7C601
1492	HLA-DQB1	A0A0A7C604
1493	HLA-B	A0A0A7C605
1494	HLA-DQB1	A0A0A7C607
1495	HLA-DQB1	A0A0A7C609
1496	HLA-B	A0A0A7C611
1497	HLA-DQB1	A0A0A7C612
1498	HLA-DQB1	A0A0A7C615
1499	HLA-B	A0A0A7C616
1500	HLA-DQB1	A0A0A7C618
1501	HLA-B	A0A0A7C619
1502	HLA-DQB1	A0A0A7C621
1503	HLA-DQB1	A0A0A7C623
1504	HLA-B	A0A0A7C624
1505	HLA-DQB1	A0A0A7C626
1506	HLA-B	A0A0A7C628
1507	HLA-DQB1	A0A0A7C629
1508	HLA-DQB1	A0A0A7C631
1509	HLA-B	A0A0A7C633
1510	HLA-DQB1	A0A0A7C635
1511	HLA-DQB1	A0A0A7C636
1512	HLA-B	A0A0A7C639
1513	HLA-DQB1	A0A0A7C640
1514	HLA-DQB1	A0A0A7C642
1515	HLA-B	A0A0A7C644
1516	HLA-DQB1	A0A0A7C645
1517	HLA-B	A0A0A7C647
1518	HLA-DQB1	A0A0A7C649
1519	HLA-DQB1	A0A0A7C651
1520	HLA-B	A0A0A7C652
1521	HLA-DQB1	A0A0A7C653
1522	HLA-DQB1	A0A0A7C656
1523	HLA-B	A0A0A7C657
1524	HLA-DQB1	A0A0A7C659
1525	HLA-B	A0A0A7C662
1526	HLA-DQB1	A0A0A7C663
1527	HLA-DQB1	A0A0A7C664
1528	HLA-B	A0A0A7C667
1529	HLA-DQB1	A0A0A7C668
1530	HLA-DQB1	A0A0A7C670
1531	HLA-B	A0A0A7C672
1532	HLA-DQB1	A0A0A7C674
1533	HLA-DQB1	A0A0A7C675
1534	HLA-B	A0A0A7C676
1535	HLA-DQB1	A0A0A7C679
1536	HLA-DQB1	A0A0A7C680
1537	HLA-B	A0A0A7C681
1538	HLA-DQB1	A0A0A7C684
1539	HLA-B	A0A0A7C685
1540	HLA-DQB1	A0A0A7C686
1541	HLA-DQB1	A0A0A7C689
1542	HLA-B	A0A0A7C691
1543	HLA-DQB1	A0A0A7C692
1544	HLA-DQB1	A0A0A7C695
1545	HLA-B	A0A0A7C696
1546	HLA-DQB1	A0A0A7C697
1547	HLA-B	A0A0A7C699
1548	HLA-DQB1	A0A0A7C6A0
1549	HLA-DQB1	A0A0A7C6A1
1550	HLA-B	A0A0A7C6A3
1551	HLA-DQB1	A0A0A7C6A4
1552	HLA-DQB1	A0A0A7C6A5
1553	HLA-B	A0A0A7C6A7
1554	HLA-DQB1	A0A0A7C6A8
1555	HLA-DQB1	A0A0A7C6B1
1556	HLA-DQB1	A0A0A7C6B4
1557	HLA-DQB1	A0A0A7C6B8
1558	HLA-DQB1	A0A0A7C6C3
1559	HLA-DQB1	A0A0A7C6C6
1560	HLA-DQB1	A0A0A7C6D1
1561	HLA-DQB1	A0A0A7C6D7
1562	HLA-DQB1	A0A0A7C6D8
1563	HLA-DQB1	A0A0A7C6E0
1564	HLA-DQB1	A0A0A7C6E3
1565	HLA-DQB1	A0A0A7C6E5
1566	HLA-DQB1	A0A0A7C6E6
1567	HLA-DQB1	A0A0A7C6E9
1568	HLA-DQB1	A0A0A7C6F0
1569	HLA-DQB1	A0A0A7C6F2
1570	HLA-DQB1	A0A0A7C6F5
1571	HLA-DQB1	A0A0A7C6F6
1572	HLA-DQB1	A0A0A7C6F8
1573	HLA-DQB1	A0A0A7C6G0
1574	HLA-DQB1	A0A0A7C6G1
1575	HLA-DQB1	A0A0A7C6G3
1576	HLA-DQB1	A0A0A7C6G5
1577	HLA-DQB1	A0A0A7C6G6
1578	HLA-DQB1	A0A0A7C6G7
1579	HLA-DQB1	A0A0A7C6H0
1580	HLA-DQB1	A0A0A7C6H1
1581	HLA-DQB1	A0A0A7C6H3
1582	HLA-DQB1	A0A0A7C6H4
1583	HLA-DQB1	A0A0A7C6H5
1584	HLA-DQB1	A0A0A7C6H7
1585	HLA-DQB1	A0A0A7C6H9
1586	HLA-DQB1	A0A0A7C6I0
1587	HLA-DQB1	A0A0A7C6I2
1588	HLA-DQB1	A0A0A7C6I3
1589	HLA-DQB1	A0A0A7C6I4
1590	HLA-DQB1	A0A0A7C6I7
1591	HLA-DQB1	A0A0A7C6I8
1592	HLA-DQB1	A0A0A7C6I9
1593	HLA-DQB1	A0A0A7C6J1
1594	HLA-DQB1	A0A0A7C6J4
1595	HLA-DQB1	A0A0A7C6J5
1596	HLA-DQB1	A0A0A7C6J6
1597	HLA-DQB1	A0A0A7C6J7
1598	HLA-DQB1	A0A0A7C6J9
1599	HLA-DQB1	A0A0A7C6K0
1600	HLA-DQB1	A0A0A7C6K3
1601	HLA-DQB1	A0A0A7C6K4
1602	HLA-DQB1	A0A0A7C6K5
1603	HLA-DQB1	A0A0A7C6K7
1604	HLA-DQB1	A0A0A7C6K9
1605	HLA-DQB1	A0A0A7C6L0
1606	HLA-DQB1	A0A0A7C6L2
1607	HLA-DQB1	A0A0A7C6L3
1608	HLA-A	A0A0A7C6L4
1609	HLA-DQB1	A0A0A7C6L6
1610	HLA-DQB1	A0A0A7C6L8
1611	HLA-A	A0A0A7C6L9
1612	HLA-DQB1	A0A0A7C6M0
1613	HLA-DQB1	A0A0A7C6M2
1614	HLA-A	A0A0A7C6M3
1615	HLA-DQB1	A0A0A7C6M6
1616	HLA-DQB1	A0A0A7C6M7
1617	HLA-A	A0A0A7C6M8
1618	HLA-DQB1	A0A0A7C6N0
1619	HLA-DQB1	A0A0A7C6N1
1620	HLA-A	A0A0A7C6N4
1621	HLA-DQB1	A0A0A7C6N5
1622	HLA-DQB1	A0A0A7C6N7
1623	HLA-A	A0A0A7C6N8
1624	HLA-DQB1	A0A0A7C6N9
1625	HLA-A	A0A0A7C6P2
1626	HLA-DQB1	A0A0A7C6P3
1627	HLA-DQB1	A0A0A7C6P4
1628	HLA-DQB1	A0A0A7C6P6
1629	HLA-A	A0A0A7C6P7
1630	HLA-DQB1	A0A0A7C6P9
1631	HLA-A	A0A0A7C6Q0
1632	HLA-A	A0A0A7C6Q2
1633	HLA-DQB1	A0A0A7C6Q4
1634	HLA-A	A0A0A7C6Q5
1635	HLA-A	A0A0A7C6Q6
1636	HLA-A	A0A0A7C6Q9
1637	HLA-A	A0A0A7C6R0
1638	HLA-DQB1	A0A0A7C6R1
1639	HLA-A	A0A0A7C6R3
1640	HLA-A	A0A0A7C6R4
1641	HLA-A	A0A0A7C6R7
1642	HLA-A	A0A0A7C6R8
1643	HLA-DQB1	A0A0A7C6R9
1644	HLA-A	A0A0A7C6S1
1645	HLA-A	A0A0A7C6S2
1646	HLA-DQB1	A0A0A7C6S4
1647	HLA-A	A0A0A7C6S5
1648	HLA-A	A0A0A7C6S6
1649	HLA-A	A0A0A7C6S8
1650	HLA-DQB1	A0A0A7C6S9
1651	HLA-A	A0A0A7C6T0
1652	HLA-A	A0A0A7C6T2
1653	HLA-DQB1	A0A0A7C6T3
1654	HLA-A	A0A0A7C6T4
1655	HLA-A	A0A0A7C6T6
1656	HLA-A	A0A0A7C6T8
1657	HLA-A	A0A0A7C6U0
1658	HLA-DQB1	A0A0A7C6U1
1659	HLA-A	A0A0A7C6U2
1660	HLA-A	A0A0A7C6U3
1661	HLA-DQB1	A0A0A7C6U5
1662	HLA-A	A0A0A7C6U6
1663	HLA-A	A0A0A7C6U7
1664	HLA-A	A0A0A7C6V0
1665	HLA-DQB1	A0A0A7C6V1
1666	HLA-A	A0A0A7C6V2
1667	HLA-A	A0A0A7C6V5
1668	HLA-A	A0A0A7C6V6
1669	HLA-DQB1	A0A0A7C6V8
1670	HLA-A	A0A0A7C6W0
1671	HLA-A	A0A0A7C6W1
1672	HLA-A	A0A0A7C6W4
1673	HLA-A	A0A0A7C6W5
1674	HLA-DQB1	A0A0A7C6W6
1675	HLA-A	A0A0A7C6W9
1676	HLA-A	A0A0A7C6X0
1677	HLA-DQB1	A0A0A7C6X3
1678	HLA-A	A0A0A7C6X5
1679	HLA-A	A0A0A7C6X6
1680	HLA-DQB1	A0A0A7C6X8
1681	HLA-A	A0A0A7C6Y0
1682	HLA-A	A0A0A7C6Y2
1683	HLA-DQB1	A0A0A7C6Y3
1684	HLA-A	A0A0A7C6Y6
1685	HLA-A	A0A0A7C6Y7
1686	HLA-DQB1	A0A0A7C6Z0
1687	HLA-A	A0A0A7C6Z1
1688	HLA-A	A0A0A7C6Z3
1689	HLA-A	A0A0A7C6Z6
1690	HLA-A	A0A0A7C6Z7
1691	HLA-DQB1	A0A0A7C6Z8
1692	HLA-A	A0A0A7C701
1693	HLA-A	A0A0A7C702
1694	HLA-A	A0A0A7C706
1695	HLA-A	A0A0A7C707
1696	HLA-A	A0A0A7C710
1697	HLA-A	A0A0A7C711
1698	HLA-A	A0A0A7C714
1699	HLA-A	A0A0A7C716
1700	HLA-DQB1	A0A0A7C719
1701	HLA-A	A0A0A7C720
1702	HLA-A	A0A0A7C721
1703	HLA-A	A0A0A7C725
1704	HLA-A	A0A0A7C726
1705	HLA-A	A0A0A7C729
1706	HLA-A	A0A0A7C730
1707	HLA-DQB1	A0A0A7C731
1708	HLA-DQB1	A0A0A7C733
1709	HLA-DQB1	A0A0A7C734
1710	HLA-A	A0A0A7C735
1711	HLA-A	A0A0A7C736
1712	HLA-DQB1	A0A0A7C738
1713	HLA-DQB1	A0A0A7C739
1714	HLA-A	A0A0A7C741
1715	HLA-A	A0A0A7C742
1716	HLA-DQB1	A0A0A7C743
1717	HLA-DQB1	A0A0A7C744
1718	HLA-DQB1	A0A0A7C746
1719	HLA-A	A0A0A7C747
1720	HLA-A	A0A0A7C748
1721	HLA-DQB1	A0A0A7C750
1722	HLA-DQB1	A0A0A7C751
1723	HLA-A	A0A0A7C752
1724	HLA-DQB1	A0A0A7C753
1725	HLA-A	A0A0A7C754
1726	HLA-DQB1	A0A0A7C756
1727	HLA-DQB1	A0A0A7C757
1728	HLA-A	A0A0A7C759
1729	HLA-A	A0A0A7C760
1730	HLA-DQB1	A0A0A7C761
1731	HLA-DQB1	A0A0A7C762
1732	HLA-DQB1	A0A0A7C764
1733	HLA-A	A0A0A7C765
1734	HLA-A	A0A0A7C766
1735	HLA-DQB1	A0A0A7C767
1736	HLA-DQB1	A0A0A7C769
1737	HLA-A	A0A0A7C770
1738	HLA-DQB1	A0A0A7C771
1739	HLA-A	A0A0A7C772
1740	HLA-DQB1	A0A0A7C774
1741	HLA-DQB1	A0A0A7C775
1742	HLA-A	A0A0A7C776
1743	HLA-A	A0A0A7C778
1744	HLA-DQB1	A0A0A7C779
1745	HLA-DQB1	A0A0A7C780
1746	HLA-DQB1	A0A0A7C782
1747	HLA-A	A0A0A7C783
1748	HLA-B	A0A0A7C784
1749	HLA-DQB1	A0A0A7C785
1750	HLA-DQB1	A0A0A7C786
1751	HLA-A	A0A0A7C788
1752	HLA-DQB1	A0A0A7C789
1753	HLA-B	A0A0A7C790
1754	HLA-DQB1	A0A0A7C792
1755	HLA-DQB1	A0A0A7C793
1756	HLA-A	A0A0A7C794
1757	HLA-B	A0A0A7C796
1758	HLA-DQB1	A0A0A7C797
1759	HLA-DQB1	A0A0A7C798
1760	HLA-B	A0A0A7C7A0
1761	HLA-A	A0A0A7C7A1
1762	HLA-DQB1	A0A0A7C7A2
1763	HLA-A	A0A0A7C7A3
1764	HLA-DQB1	A0A0A7C7A5
1765	HLA-B	A0A0A7C7A6
1766	HLA-A	A0A0A7C7A7
1767	HLA-A	A0A0A7C7A8
1768	HLA-DQB1	A0A0A7C7B0
1769	HLA-B	A0A0A7C7B1
1770	HLA-A	A0A0A7C7B2
1771	HLA-A	A0A0A7C7B3
1772	HLA-A	A0A0A7C7B5
1773	HLA-B	A0A0A7C7B6
1774	HLA-DQB1	A0A0A7C7B7
1775	HLA-B	A0A0A7C7B8
1776	HLA-A	A0A0A7C7C0
1777	HLA-B	A0A0A7C7C1
1778	HLA-A	A0A0A7C7C2
1779	HLA-DQB1	A0A0A7C7C4
1780	HLA-B	A0A0A7C7C5
1781	HLA-DQB1	A0A0A7C7C6
1782	HLA-B	A0A0A7C7C7
1783	HLA-A	A0A0A7C7C8
1784	HLA-B	A0A0A7C7D0
1785	HLA-A	A0A0A7C7D1
1786	HLA-B	A0A0A7C7D3
1787	HLA-DQB1	A0A0A7C7D4
1788	HLA-B	A0A0A7C7D5
1789	HLA-A	A0A0A7C7D6
1790	HLA-A	A0A0A7C7D8
1791	HLA-B	A0A0A7C7D9
1792	HLA-DQB1	A0A0A7C7E0
1793	HLA-B	A0A0A7C7E1
1794	HLA-A	A0A0A7C7E3
1795	HLA-B	A0A0A7C7E4
1796	HLA-DQB1	A0A0A7C7E5
1797	HLA-B	A0A0A7C7E6
1798	HLA-A	A0A0A7C7E7
1799	HLA-B	A0A0A7C7E9
1800	HLA-B	A0A0A7C7F0
1801	HLA-DQB1	A0A0A7C7F1
1802	HLA-A	A0A0A7C7F2
1803	HLA-A	A0A0A7C7F4
1804	HLA-DQB1	A0A0A7C7F5
1805	HLA-B	A0A0A7C7F6
1806	HLA-B	A0A0A7C7F7
1807	HLA-A	A0A0A7C7F9
1808	HLA-DQB1	A0A0A7C7G0
1809	HLA-A	A0A0A7C7G1
1810	HLA-B	A0A0A7C7G2
1811	HLA-B	A0A0A7C7G3
1812	HLA-A	A0A0A7C7G5
1813	HLA-DQB1	A0A0A7C7G6
1814	HLA-B	A0A0A7C7G7
1815	HLA-B	A0A0A7C7G9
1816	HLA-A	A0A0A7C7H0
1817	HLA-B	A0A0A7C7H1
1818	HLA-DQB1	A0A0A7C7H3
1819	HLA-B	A0A0A7C7H4
1820	HLA-A	A0A0A7C7H5
1821	HLA-B	A0A0A7C7H6
1822	HLA-B	A0A0A7C7H8
1823	HLA-DQB1	A0A0A7C7H9
1824	HLA-A	A0A0A7C7I0
1825	HLA-B	A0A0A7C7I2
1826	HLA-A	A0A0A7C7I3
1827	HLA-B	A0A0A7C7I4
1828	HLA-DQB1	A0A0A7C7I5
1829	HLA-A	A0A0A7C7I7
1830	HLA-B	A0A0A7C7I8
1831	HLA-B	A0A0A7C7I9
1832	HLA-DQB1	A0A0A7C7J0
1833	HLA-A	A0A0A7C7J2
1834	HLA-B	A0A0A7C7J3
1835	HLA-B	A0A0A7C7J4
1836	HLA-DQB1	A0A0A7C7J6
1837	HLA-A	A0A0A7C7J7
1838	HLA-B	A0A0A7C7J8
1839	HLA-B	A0A0A7C7J9
1840	HLA-A	A0A0A7C7K0
1841	HLA-DQB1	A0A0A7C7K2
1842	HLA-B	A0A0A7C7K3
1843	HLA-A	A0A0A7C7K4
1844	HLA-B	A0A0A7C7K5
1845	HLA-DQB1	A0A0A7C7K7
1846	HLA-A	A0A0A7C7K8
1847	HLA-B	A0A0A7C7K9
1848	HLA-B	A0A0A7C7L0
1849	HLA-DQB1	A0A0A7C7L2
1850	HLA-A	A0A0A7C7L3
1851	HLA-B	A0A0A7C7L4
1852	HLA-B	A0A0A7C7L6
1853	HLA-A	A0A0A7C7L7
1854	HLA-B	A0A0A7C7L8
1855	HLA-DQB1	A0A0A7C7L9
1856	HLA-A	A0A0A7C7M1
1857	HLA-B	A0A0A7C7M2
1858	HLA-DQB1	A0A0A7C7M3
1859	HLA-B	A0A0A7C7M4
1860	HLA-A	A0A0A7C7M6
1861	HLA-B	A0A0A7C7M8
1862	HLA-B	A0A0A7C7M9
1863	HLA-A	A0A0A7C7N0
1864	HLA-DQB1	A0A0A7C7N1
1865	HLA-B	A0A0A7C7N2
1866	HLA-B	A0A0A7C7N3
1867	HLA-A	A0A0A7C7N4
1868	HLA-DQB1	A0A0A7C7N5
1869	HLA-B	A0A0A7C7N6
1870	HLA-A	A0A0A7C7N7
1871	HLA-B	A0A0A7C7N8
1872	HLA-DQB1	A0A0A7C7N9
1873	HLA-DQB1	A0A0A7C7P0
1874	HLA-A	A0A0A7C7P1
1875	HLA-B	A0A0A7C7P3
1876	HLA-DQB1	A0A0A7C7P4
1877	HLA-A	A0A0A7C7P5
1878	HLA-B	A0A0A7C7P7
1879	HLA-DQB1	A0A0A7C7P8
1880	HLA-A	A0A0A7C7P9
1881	HLA-DQB1	A0A0A7C7Q0
1882	HLA-B	A0A0A7C7Q2
1883	HLA-A	A0A0A7C7Q3
1884	HLA-DQB1	A0A0A7C7Q4
1885	HLA-DQB1	A0A0A7C7Q5
1886	HLA-DQB1	A0A0A7C7Q6
1887	HLA-B	A0A0A7C7Q8
1888	HLA-A	A0A0A7C7Q9
1889	HLA-DQB1	A0A0A7C7R0
1890	HLA-DQB1	A0A0A7C7R1
1891	HLA-A	A0A0A7C7R2
1892	HLA-DQB1	A0A0A7C7R3
1893	HLA-B	A0A0A7C7R4
1894	HLA-DQB1	A0A0A7C7R5
1895	HLA-DQB1	A0A0A7C7R6
1896	HLA-A	A0A0A7C7R7
1897	HLA-B	A0A0A7C7R8
1898	HLA-DQB1	A0A0A7C7R9
1899	HLA-DQB1	A0A0A7C7S0
1900	HLA-A	A0A0A7C7S1
1901	HLA-DQB1	A0A0A7C7S2
1902	HLA-DQB1	A0A0A7C7S4
1903	HLA-DQB1	A0A0A7C7S6
1904	HLA-A	A0A0A7C7S7
1905	HLA-DQB1	A0A0A7C7S8
1906	HLA-DQB1	A0A0A7C7S9
1907	HLA-DQB1	A0A0A7C7T1
1908	HLA-A	A0A0A7C7T2
1909	HLA-DQB1	A0A0A7C7T3
1910	HLA-A	A0A0A7C7T4
1911	HLA-DQB1	A0A0A7C7T6
1912	HLA-DQB1	A0A0A7C7T7
1913	HLA-B	A0A0A7C7U0
1914	HLA-DQB1	A0A0A7C7U1
1915	HLA-DQB1	A0A0A7C7U3
1916	HLA-DQB1	A0A0A7C7U4
1917	HLA-B	A0A0A7C7U7
1918	HLA-DQB1	A0A0A7C7U8
1919	HLA-DQB1	A0A0A7C7V0
1920	HLA-DQB1	A0A0A7C7V1
1921	HLA-B	A0A0A7C7V2
1922	HLA-DQB1	A0A0A7C7V4
1923	HLA-DQB1	A0A0A7C7V5
1924	HLA-DQB1	A0A0A7C7V7
1925	HLA-B	A0A0A7C7V8
1926	HLA-DQB1	A0A0A7C7V9
1927	HLA-DQB1	A0A0A7C7W1
1928	HLA-B	A0A0A7C7W2
1929	HLA-DQB1	A0A0A7C7W4
1930	HLA-A	A0A0A7C7W7
1931	HLA-DQB1	A0A0A7C7W8
1932	HLA-B	A0A0A7C7W9
1933	HLA-A	A0A0A7C7X1
1934	HLA-DQB1	A0A0A7C7X3
1935	HLA-B	A0A0A7C7X4
1936	HLA-A	A0A0A7C7X5
1937	HLA-A	A0A0A7C7X7
1938	HLA-B	A0A0A7C7Y0
1939	HLA-DQB1	A0A0A7C7Y1
1940	HLA-A	A0A0A7C7Y3
1941	HLA-B	A0A0A7C7Y6
1942	HLA-A	A0A0A7C7Y7
1943	HLA-DQB1	A0A0A7C7Y9
1944	HLA-A	A0A0A7C7Z2
1945	HLA-B	A0A0A7C7Z3
1946	HLA-A	A0A0A7C7Z6
1947	HLA-DQB1	A0A0A7C7Z7
1948	HLA-B	A0A0A7C800
1949	HLA-A	A0A0A7C801
1950	HLA-DQB1	A0A0A7C804
1951	HLA-A	A0A0A7C805
1952	HLA-B	A0A0A7C808
1953	HLA-A	A0A0A7C811
1954	HLA-DQB1	A0A0A7C812
1955	HLA-B	A0A0A7C814
1956	HLA-A	A0A0A7C816
1957	HLA-DQB1	A0A0A7C818
1958	HLA-A	A0A0A7C820
1959	HLA-B	A0A0A7C822
1960	HLA-A	A0A0A7C825
1961	HLA-DQB1	A0A0A7C826
1962	HLA-B	A0A0A7C829
1963	HLA-A	A0A0A7C830
1964	HLA-DQB1	A0A0A7C833
1965	HLA-A	A0A0A7C834
1966	HLA-B	A0A0A7C836
1967	HLA-A	A0A0A7C838
1968	HLA-DQB1	A0A0A7C839
1969	HLA-A	A0A0A7C842
1970	HLA-B	A0A0A7C843
1971	HLA-DQB1	A0A0A7C845
1972	HLA-A	A0A0A7C848
1973	HLA-B	A0A0A7C849
1974	HLA-A	A0A0A7C852
1975	HLA-DQB1	A0A0A7C853
1976	HLA-B	A0A0A7C856
1977	HLA-A	A0A0A7C857
1978	HLA-DQB1	A0A0A7C860
1979	HLA-A	A0A0A7C861
1980	HLA-B	A0A0A7C862
1981	HLA-A	A0A0A7C865
1982	HLA-DQB1	A0A0A7C867
1983	HLA-B	A0A0A7C868
1984	HLA-A	A0A0A7C871
1985	HLA-B	A0A0A7C872
1986	HLA-DQB1	A0A0A7C874
1987	HLA-A	A0A0A7C876
1988	HLA-B	A0A0A7C879
1989	HLA-DQB1	A0A0A7C880
1990	HLA-A	A0A0A7C881
1991	HLA-B	A0A0A7C885
1992	HLA-DQB1	A0A0A7C886
1993	HLA-A	A0A0A7C887
1994	HLA-A	A0A0A7C890
1995	HLA-B	A0A0A7C891
1996	HLA-A	A0A0A7C894
1997	HLA-B	A0A0A7C896
1998	HLA-A	A0A0A7C899
[truncated: 37,402 more rows]

## Sheet: pathway_enrichment_results
Supp. Data8.Tab4 The pathway enrichment results of DEPs detected by different methods. The filtering threshold was set to be pvalue<0.01.
ID	Description	GeneRatio	BgRatio	pvalue	p.adjust	qvalue	geneID	Count	Group	Pathway	Validate	GeneRatio_num	logP	max_logP
hsa05168	Herpes simplex virus 1 infection	7\43	180\9376	1.53734e-05	0.00147724	0.00133729	OAS1\PML\STAT1\MTOR\TAP1\TAP2\TRAF2	7	MCP	hsa05168	TRUE	0.162791	4.81323	6.02954
hsa04621	NOD-like receptor signaling pathway	7\43	187\9376	1.96965e-05	0.00147724	0.00133729	OAS1\GBP1\GBP2\STAT1\TRAF2\GBP5\GBP4	7	MCP	hsa04621	TRUE	0.162791	4.70561	4.70561
hsa05170	Human immunodeficiency virus 1 infection	6\43	214\9376	0.000396831	0.0198415	0.0179618	MTOR\RBX1\TAP1\TAP2\TRAF2\TRIM5	6	MCP	hsa05170	TRUE	0.139535	3.40139	3.40139
hsa05340	Primary immunodeficiency	3\43	38\9376	0.000677804	0.0254176	0.0230097	UNG\TAP1\TAP2	3	MCP	hsa05340	TRUE	0.0697674	3.1689	3.68048
hsa05169	Epstein-Barr virus infection	5\43	205\9376	0.00233126	0.0699377	0.0633121	OAS1\STAT1\TAP1\TAP2\TRAF2	5	MCP	hsa05169	TRUE	0.116279	2.63241	2.63241
hsa05212	Pancreatic cancer	3\43	77\9376	0.00519135	0.10745	0.0972701	STAT1\MTOR\SMAD4	3	MCP	hsa05212	TRUE	0.0697674	2.28472	2.28472
hsa05160	Hepatitis C	4\43	156\9376	0.00549621	0.10745	0.0972701	OAS1\IFIT1\STAT1\TRAF2	4	MCP	hsa05160	TRUE	0.0930233	2.25994	2.25994
hsa05131	Shigellosis	5\43	253\9376	0.00573064	0.10745	0.0972701	WASL\MTOR\RBX1\TRAF2\TLN2	5	MCP	hsa05131	TRUE	0.116279	2.2418	2.2418
hsa04136	Autophagy - other	2\43	32\9376	0.00933951	0.155659	0.140912	ATG7\MTOR	2	MCP	hsa04136	FALSE	0.0465116	2.02968	2.20348
hsa05168	Herpes simplex virus 1 infection	7\29	180\9376	9.34245e-07	0.000114912	0.000100308	SP100\PML\STAT1\MTOR\STAT2\TAP1\TAP2	7	dlfq	hsa05168	TRUE	0.241379	6.02954	6.02954
hsa05340	Primary immunodeficiency	3\29	38\9376	0.000208697	0.0128349	0.0112037	UNG\TAP1\TAP2	3	dlfq	hsa05340	TRUE	0.103448	3.68048	3.68048
hsa04621	NOD-like receptor signaling pathway	4\29	187\9376	0.0024633	0.100995	0.08816	GBP1\GBP2\STAT1\STAT2	4	dlfq	hsa04621	TRUE	0.137931	2.60848	4.70561
hsa05169	Epstein-Barr virus infection	4\29	205\9376	0.00343341	0.105577	0.0921599	STAT1\STAT2\TAP1\TAP2	4	dlfq	hsa05169	TRUE	0.137931	2.46427	2.63241
hsa02010	ABC transporters	2\29	45\9376	0.00842232	0.191	0.166727	TAP1\TAP2	2	dlfq	hsa02010	FALSE	0.0689655	2.07457	2.07457
hsa04120	Ubiquitin mediated proteolysis	3\29	142\9376	0.00931707	0.191	0.166727	PML\UBE4A\UBE2S	3	dlfq	hsa04120	TRUE	0.103448	2.03072	2.37248
hsa04120	Ubiquitin mediated proteolysis	3\22	142\9376	0.00424147	0.278535	0.278535	PML\UBE2K\UBE2S	3	maxlfq	hsa04120	TRUE	0.136364	2.37248	2.37248
hsa05168	Herpes simplex virus 1 infection	3\22	180\9376	0.00819222	0.278535	0.278535	SP100\PML\TAP1	3	maxlfq	hsa05168	TRUE	0.136364	2.0866	6.02954
hsa00563	Glycosylphosphatidylinositol (GPI)-anchor biosynthesis	2\35	30\9376	0.00551516	0.25037	0.25037	PIGG\PIGO	2	top0	hsa00563	FALSE	0.0571429	2.25844	2.25844
hsa04136	Autophagy - other	2\35	32\9376	0.00625925	0.25037	0.25037	ATG7\IGBP1	2	top0	hsa04136	FALSE	0.0571429	2.20348	2.20348
hsa00983	Drug metabolism - other enzymes	2\17	82\9376	0.00943727	0.253708	0.238949	UPP1\ITPA	2	top3	hsa00983	FALSE	0.117647	2.02515	2.02515
hsa05146	Amoebiasis	3\21	103\9376	0.00148299	0.0830476	0.0780523	HSPB1\LAMC1\RAB7A	3	count	hsa05146	TRUE	0.142857	2.82886	2.82886
hsa04330	Notch signaling pathway	2\21	62\9376	0.00833321	0.23333	0.219295	DTX3L\NCOR2	2	count	hsa04330	FALSE	0.0952381	2.07919	2.07919

## Sheet: DEPs_SCP_U2OS
Supp. Data8.Tab5 The DEPs detected by different methods from U2OS single cell data and their validation status.
protein	Validation_Status	dlfq	top3	maxlfq	top1	MCP
E9PRG8	Not_in_database	1	0	0	0	1
O00116	Not_in_database	1	0	1	1	1
O15042	Not_in_database	1	0	0	0	1
O15533	In_database	1	1	1	1	1
O95864	Not_in_database	1	1	1	0	1
P02452	Not_in_database	1	1	1	0	1
P10321	In_database	1	0	0	1	1
P30049	Not_in_database	1	1	1	1	1
P35527	Not_in_database	1	1	0	0	0
P40429	Not_in_database	1	0	1	0	1
P42167	Not_in_database	1	0	1	0	1
P50897	Not_in_database	1	0	0	0	1
P52815	Not_in_database	1	1	1	1	1
P62854	Not_in_database	1	0	1	0	1
Q03518	In_database	1	1	1	1	1
Q03519	In_database	1	0	0	0	1
Q6UWP7	Not_in_database	1	0	0	0	1
Q86UE4	Not_in_database	1	0	0	0	1
Q8N684	Not_in_database	1	0	1	1	1
Q96FS4	Not_in_database	1	0	0	0	1
Q9BQE5	Not_in_database	1	0	1	0	1
Q9NWH9	Not_in_database	1	0	0	0	1
Q9P2E9	Not_in_database	1	1	1	0	1
Q9Y6M1	Not_in_database	1	0	0	0	1
P04439	In_database	0	1	0	0	1
P06748	Not_in_database	0	1	0	1	0
P17987	Not_in_database	0	1	0	0	0
P43307	Not_in_database	0	1	0	1	0
P61353	Not_in_database	0	1	0	1	0
P61803	Not_in_database	0	1	0	1	1
P62750	Not_in_database	0	1	0	0	0
Q9P0L0	Not_in_database	0	1	0	0	0
P07437	Not_in_database	0	0	1	0	1
Q9Y2Q9	In_database	0	0	1	0	0
P05141	Not_in_database	0	0	0	1	0
P13073	Not_in_database	0	0	0	1	0
P39019	Not_in_database	0	0	0	1	0
P05387	Not_in_database	0	0	0	0	1
P10412	Not_in_database	0	0	0	0	1
P50570	Not_in_database	0	0	0	0	1
P62829	Not_in_database	0	0	0	0	1
Q04941	Not_in_database	0	0	0	0	1
Q15005	Not_in_database	0	0	0	0	1
Q5UCC4	Not_in_database	0	0	0	0	1
Q9NYK5	Not_in_database	0	0	0	0	1

## Sheet: pathway_enrichment_SCP_U2OS
Supp. Data8.Tab6 The DEPs detected by different methods from U2OS single cell data and their validation status. The threshold of pvalue<0.01 was applied.
Method	Pathway	NegLogPadj	Genes
MCP	Antigen processing and presentation	3.81547	TAPBP; HLA-A; HLA-C; TAP1; TAP2
dlfq	Antigen processing and presentation	3.01344	TAPBP; HLA-C; TAP1; TAP2
maxlfq	Antigen processing and presentation	0.895038	TAPBP; TAP1
top3	Antigen processing and presentation	1.91148	TAPBP; HLA-A; TAP1
top1	Antigen processing and presentation	2.08042	TAPBP; HLA-C; TAP1
MCP	Ribosome	3.13654	RPLP2; RPL13A; MRPL12; RPL23; RPS26; MRPL39
dlfq	Ribosome	1.27913	RPL13A; MRPL12; RPS26
maxlfq	Ribosome	2.07033	RPL13A; MRPL12; RPS26; MRPS28
top3	Ribosome	1.47531	MRPL12; RPL27; RPL23A
top1	Ribosome	1.69722	RPS19; MRPL12; RPL27
MCP	Phagosome	2.94102	HLA-A; TUBB; HLA-C; TAP1; TAP2
dlfq	Phagosome	1.58078	HLA-C; TAP1; TAP2
maxlfq	Phagosome	0
top3	Phagosome	0
top1	Phagosome	0
MCP	Herpes simplex virus 1 infection	2.75674	TAPBP; HLA-A; HLA-C; TAP1; TAP2
dlfq	Herpes simplex virus 1 infection	1.99859	TAPBP; HLA-C; TAP1; TAP2
maxlfq	Herpes simplex virus 1 infection	0
top3	Herpes simplex virus 1 infection	1.47531	TAPBP; HLA-A; TAP1
top1	Herpes simplex virus 1 infection	1.69722	TAPBP; HLA-C; TAP1
MCP	Epstein-Barr virus infection	2.58772	TAPBP; HLA-A; HLA-C; TAP1; TAP2
dlfq	Epstein-Barr virus infection	1.99859	TAPBP; HLA-C; TAP1; TAP2
maxlfq	Epstein-Barr virus infection	0
top3	Epstein-Barr virus infection	1.47531	TAPBP; HLA-A; TAP1
top1	Epstein-Barr virus infection	1.69722	TAPBP; HLA-C; TAP1
MCP	Human immunodeficiency virus 1 infection	2.57971	TAPBP; HLA-A; HLA-C; TAP1; TAP2
dlfq	Human immunodeficiency virus 1 infection	1.99859	TAPBP; HLA-C; TAP1; TAP2
maxlfq	Human immunodeficiency virus 1 infection	0
top3	Human immunodeficiency virus 1 infection	1.47531	TAPBP; HLA-A; TAP1
top1	Human immunodeficiency virus 1 infection	1.69722	TAPBP; HLA-C; TAP1
MCP	Human cytomegalovirus infection	2.52755	TAPBP; HLA-A; HLA-C; TAP1; TAP2
dlfq	Human cytomegalovirus infection	1.99859	TAPBP; HLA-C; TAP1; TAP2
maxlfq	Human cytomegalovirus infection	0
top3	Human cytomegalovirus infection	1.47531	TAPBP; HLA-A; TAP1
top1	Human cytomegalovirus infection	1.69722	TAPBP; HLA-C; TAP1
MCP	Coronavirus disease - COVID-19	1.51272	RPLP2; RPL13A; RPL23; RPS26
dlfq	Coronavirus disease - COVID-19	0
maxlfq	Coronavirus disease - COVID-19	0
top3	Coronavirus disease - COVID-19	0
top1	Coronavirus disease - COVID-19	0
MCP	Primary immunodeficiency	1.45894	TAP1; TAP2
dlfq	Primary immunodeficiency	1.60106	TAP1; TAP2
maxlfq	Primary immunodeficiency	0
top3	Primary immunodeficiency	0
top1	Primary immunodeficiency	0
MCP	Allograft rejection	1.45894	HLA-A; HLA-C
dlfq	Allograft rejection	0
maxlfq	Allograft rejection	0
top3	Allograft rejection	0
top1	Allograft rejection	0
MCP	Type I diabetes mellitus	1.45131	HLA-A; HLA-C
dlfq	Type I diabetes mellitus	0
maxlfq	Type I diabetes mellitus	0
top3	Type I diabetes mellitus	0
top1	Type I diabetes mellitus	0
MCP	ABC transporters	1.45131	TAP1; TAP2
dlfq	ABC transporters	1.58078	TAP1; TAP2
maxlfq	ABC transporters	0
top3	ABC transporters	0
top1	ABC transporters	0
MCP	Graft-versus-host disease	1.45131	HLA-A; HLA-C
dlfq	Graft-versus-host disease	0
maxlfq	Graft-versus-host disease	0
top3	Graft-versus-host disease	0
top1	Graft-versus-host disease	0
MCP	Autoimmune thyroid disease	1.32985	HLA-A; HLA-C
dlfq	Autoimmune thyroid disease	0
maxlfq	Autoimmune thyroid disease	0
top3	Autoimmune thyroid disease	0
top1	Autoimmune thyroid disease	0
MCP	Fatty acid metabolism	1.31454	FADS2; PPT1
dlfq	Fatty acid metabolism	1.43045	FADS2; PPT1
maxlfq	Fatty acid metabolism	0
top3	Fatty acid metabolism	0
top1	Fatty acid metabolism	0
MCP	Protein processing in endoplasmic reticulum	0
dlfq	Protein processing in endoplasmic reticulum	0
maxlfq	Protein processing in endoplasmic reticulum	0
top3	Protein processing in endoplasmic reticulum	1.47531	SSR1; DAD1; RRBP1
top1	Protein processing in endoplasmic reticulum	0
MCP	Diabetic cardiomyopathy	0
dlfq	Diabetic cardiomyopathy	0
maxlfq	Diabetic cardiomyopathy	0
top3	Diabetic cardiomyopathy	0
top1	Diabetic cardiomyopathy	1.69722	SLC25A5; COX4I1; ATP5F1D
MCP	Chemical carcinogenesis - reactive oxygen species	0
dlfq	Chemical carcinogenesis - reactive oxygen species	0
maxlfq	Chemical carcinogenesis - reactive oxygen species	0
top3	Chemical carcinogenesis - reactive oxygen species	0
top1	Chemical carcinogenesis - reactive oxygen species	1.69722	SLC25A5; COX4I1; ATP5F1D
MCP	Parkinson disease	0
dlfq	Parkinson disease	0
maxlfq	Parkinson disease	0
top3	Parkinson disease	0
top1	Parkinson disease	1.56001	SLC25A5; COX4I1; ATP5F1D
MCP	Prion disease	0
dlfq	Prion disease	0
maxlfq	Prion disease	0
top3	Prion disease	0
top1	Prion disease	1.56001	SLC25A5; COX4I1; ATP5F1D
MCP	Huntington disease	0
dlfq	Huntington disease	0
maxlfq	Huntington disease	0
top3	Huntington disease	0
top1	Huntington disease	1.46481	SLC25A5; COX4I1; ATP5F1D

## Sheet: U2OS_cell_representation
Supp. Data8.Tab7 U2OS cell representation by DEP expression profile from dlfq view. The last column is the labels of the cells.
X0	X1	X2	X3	X4	X5	X6	X7	X8	X9	X10	X11	X12	X13	X14	X15	X16	X17	X18	X19	X20	X21	X22	X23	label
2.03197	1.54995	1.40543	9.41628	1.04424	0.514354	9.62895	11.1116	18.2006	0.622688	10.9488	0.8536	9.53554	9.3006	1.50851	9.25948	1.97632	0.996815	1.59634	1.23654	0.876918	1.52246	1.77344	1.42939	1
2.03197	1.54995	1.40543	1.43958	1.04424	8.45731	10.567	1.07036	18.2894	0.622688	1.96596	8.58978	1.60071	0.719137	9.94743	8.59219	1.97632	0.996815	1.59634	1.23654	0.876918	1.52246	1.77344	1.42939	1
2.03197	1.54995	1.40543	10.6546	1.04424	0.514354	9.57788	10.1879	18.0651	0.622688	1.96596	0.8536	1.60071	9.31147	10.2111	9.79257	1.97632	0.996815	1.59634	1.23654	10.1221	1.52246	1.77344	1.42939	1
2.03197	1.54995	1.40543	9.71631	1.04424	0.514354	9.87125	10.599	20.4949	0.622688	1.96596	0.8536	1.60071	9.70975	8.80626	7.80954	1.97632	7.17131	6.91715	1.23654	9.0527	8.13706	1.77344	1.42939	1
2.03197	1.54995	1.40543	1.43958	1.04424	0.514354	10.083	10.0026	18.6322	10.0993	1.96596	0.8536	1.60071	10.5863	9.97901	8.42082	1.97632	0.996815	1.59634	1.23654	8.98544	1.52246	1.77344	8.19149	1
2.03197	1.54995	1.40543	10.1359	1.04424	0.514354	0.773531	1.07036	21.9535	8.86382	1.96596	0.8536	9.3644	0.719137	1.50851	8.16026	1.97632	0.996815	1.59634	1.23654	0.876918	1.52246	1.77344	1.42939	1
2.03197	10.2533	1.40543	1.43958	1.04424	0.514354	10.1963	10.5142	17.2147	10.3843	1.96596	0.8536	10.6167	8.76312	1.50851	8.20919	1.97632	0.996815	1.59634	9.11316	0.876918	7.56114	1.77344	1.42939	1
2.03197	1.54995	1.40543	1.43958	1.04424	0.514354	9.06563	1.07036	20.2619	8.07199	1.96596	0.8536	1.60071	0.719137	1.50851	6.94232	1.97632	0.996815	1.59634	1.23654	0.876918	1.52246	1.77344	1.42939	1
2.03197	1.54995	1.40543	10.3729	1.04424	0.514354	0.773531	9.94677	17.8704	8.99222	1.96596	0.8536	1.60071	0.719137	8.8032	7.43994	1.97632	0.996815	1.59634	1.23654	0.876918	1.52246	8.80858	1.42939	1
2.03197	1.54995	1.40543	1.43958	1.04424	9.80175	9.70598	1.07036	17.6985	10.5341	1.96596	0.8536	1.60071	0.719137	10.4618	7.8241	1.97632	0.996815	1.59634	1.23654	0.876918	1.52246	1.77344	1.42939	1
2.03197	1.54995	1.40543	10.9598	1.04424	0.514354	9.74505	1.07036	17.8738	10.9082	10.2974	0.8536	1.60071	0.719137	10.6183	9.62446	1.97632	0.996815	1.59634	1.23654	0.876918	1.52246	1.77344	1.42939	1
2.03197	1.54995	1.40543	11.2973	11.7974	0.514354	10.1398	10.2523	18.2315	0.622688	1.96596	0.8536	1.60071	0.719137	10.8444	7.84007	1.97632	0.996815	1.59634	1.23654	0.876918	1.52246	1.77344	10.3925	1
2.03197	1.54995	1.40543	1.43958	1.04424	0.514354	9.47953	1.07036	18.3055	0.622688	1.96596	0.8536	1.60071	9.92727	1.50851	0.0446867	1.97632	0.996815	1.59634	8.83432	0.876918	1.52246	9.95865	1.42939	1
10.4451	1.54995	1.40543	11.1847	1.04424	9.47961	10.8853	1.07036	16.4816	9.06003	10.7322	0.8536	1.60071	0.719137	9.77397	0.0446867	1.97632	0.996815	8.37036	1.23654	0.876918	10.7211	1.77344	11.2306	1
2.03197	8.39941	1.40543	11.1395	1.04424	0.514354	10.2537	10.8604	17.0465	10.9593	1.96596	0.8536	1.60071	9.81975	10.3183	8.40752	1.97632	0.996815	1.59634	1.23654	0.876918	9.14367	10.0912	1.42939	1
2.03197	1.54995	1.40543	10.9567	5.68157	0.514354	9.208	1.07036	20.4808	9.83631	1.96596	0.8536	1.60071	8.15726	1.50851	9.77553	1.97632	0.996815	1.59634	9.67396	9.26374	8.3426	1.77344	1.42939	1
2.03197	1.54995	1.40543	10.268	1.04424	8.93095	10.1724	9.57875	17.0835	7.91446	1.96596	0.8536	1.60071	9.16011	9.89832	8.81116	1.97632	7.12389	1.59634	1.23654	0.876918	1.52246	10.3034	1.42939	1
2.03197	1.54995	1.40543	10.9687	1.04424	11.5173	10.5335	11.0021	17.8689	9.58844	10.2484	0.8536	1.60071	9.54992	10.0134	5.7698	1.97632	0.996815	1.59634	9.89687	10.3557	9.36311	1.77344	1.42939	1
2.03197	1.54995	1.40543	11.2864	8.44104	9.46317	0.773531	9.931	17.8887	9.763	1.96596	0.8536	9.88202	10.1303	9.32569	8.27442	6.88661	0.996815	8.20021	1.23654	9.31497	1.52246	1.77344	1.42939	1
2.03197	1.54995	1.40543	1.43958	1.04424	0.514354	10.6464	10.3715	18.8869	10.7637	1.96596	0.8536	9.3274	0.719137	1.50851	8.30604	1.97632	0.996815	1.59634	1.23654	0.876918	1.52246	1.77344	1.42939	1
2.03197	1.54995	1.40543	8.71802	1.04424	0.514354	10.6906	9.80737	16.8615	10.5681	1.96596	0.8536	9.56801	9.48661	11.2304	8.34249	1.97632	0.996815	1.59634	1.23654	0.876918	9.48088	1.77344	10.9265	1
2.03197	1.54995	1.40543	11.2729	10.2433	0.514354	10.7794	10.683	17.9197	9.55595	1.96596	0.8536	9.45651	0.719137	10.5224	8.63063	1.97632	0.996815	1.59634	1.23654	8.26611	1.52246	1.77344	7.88202	1
2.03197	1.54995	1.40543	10.5856	1.04424	0.514354	10.0348	1.07036	16.9799	0.622688	11.2052	0.8536	9.49642	0.719137	10.0888	0.0446867	1.97632	9.28823	1.59634	1.23654	9.35281	10.5466	1.77344	10.607	1
2.03197	1.54995	1.40543	1.43958	9.00455	0.514354	10.6516	9.13537	18.017	9.55897	9.16842	0.8536	1.60071	0.719137	9.2261	0.0446867	1.97632	7.12677	11.6126	1.23654	8.93066	9.82847	1.77344	10.6742	1
2.03197	1.54995	1.40543	11.4586	1.04424	0.514354	9.85842	8.61267	19.1099	0.622688	1.96596	0.8536	1.60071	8.77884	10.0474	0.0446867	1.97632	0.996815	1.59634	1.23654	0.876918	1.52246	1.77344	1.42939	1
2.03197	1.54995	1.40543	11.2366	9.68454	0.514354	9.5203	1.07036	17.7547	8.99163	1.96596	0.8536	1.60071	10.8998	11.2839	10.1085	1.97632	0.996815	1.59634	1.23654	9.47463	1.52246	9.07303	1.42939	1
2.03197	1.54995	1.40543	11.0074	1.04424	0.514354	10.1841	9.33548	17.2369	0.622688	1.96596	0.8536	9.17551	9.84999	10.829	0.0446867	1.97632	0.996815	1.59634	1.23654	0.876918	1.52246	1.77344	1.42939	1
2.03197	1.54995	1.40543	10.1483	1.04424	0.514354	9.58915	9.77027	21.1413	9.61745	8.97922	0.8536	1.60071	9.08065	1.50851	0.0446867	1.97632	0.996815	1.59634	1.23654	0.876918	1.52246	1.77344	1.42939	1
2.03197	1.54995	1.40543	11.2366	1.04424	10.4058	10.0967	10.5111	18.3798	10.0682	1.96596	0.8536	1.60071	0.719137	9.41906	0.0446867	1.97632	0.996815	10.6688	1.23654	8.66471	1.52246	1.77344	1.42939	1
2.03197	1.54995	1.40543	11.0209	8.98159	9.63656	9.58518	9.47702	18.556	9.24362	1.96596	0.8536	1.60071	0.719137	10.8722	9.7646	1.97632	0.996815	1.59634	1.23654	0.876918	10.7525	1.77344	1.42939	1
2.03197	1.54995	1.40543	11.6328	1.04424	9.53706	10.9477	11.1041	17.1886	8.91892	1.96596	0.8536	9.47773	0.719137	10.5214	9.27652	1.97632	0.996815	10.3851	1.23654	8.495	1.52246	9.85993	1.42939	1
2.03197	9.85741	1.40543	11.5283	9.44545	8.0337	9.2915	9.6269	16.8531	10.4152	1.96596	0.8536	8.39515	10.0058	10.7105	8.33142	1.97632	0.996815	9.61105	1.23654	8.93482	1.52246	1.77344	11.5168	1
2.03197	10.9714	1.40543	10.9955	1.04424	0.514354	10.9215	10.2045	17.9487	0.622688	1.96596	0.8536	1.60071	0.719137	10.0053	0.0446867	1.97632	0.996815	1.59634	1.23654	0.876918	1.52246	1.77344	1.42939	1
2.03197	1.54995	1.40543	11.0824	1.04424	0.514354	10.0729	1.07036	18.3017	8.27668	9.17578	0.8536	8.56733	0.719137	10.354	9.76121	1.97632	0.996815	1.59634	1.23654	8.37113	9.31914	1.77344	1.42939	1
2.03197	1.54995	1.40543	1.43958	1.04424	0.514354	9.29378	1.07036	17.5651	10.0521	1.96596	0.8536	1.60071	0.719137	1.50851	0.0446867	1.97632	0.996815	1.59634	1.23654	0.876918	9.84197	1.77344	1.42939	1
2.03197	10.0879	1.40543	9.87474	1.04424	0.514354	10.2974	1.07036	17.9003	0.622688	1.96596	0.8536	1.60071	8.78589	10.4513	8.43513	1.97632	0.996815	1.59634	7.07581	9.45618	1.52246	1.77344	10.0529	1
2.03197	8.7539	1.40543	1.43958	1.04424	0.514354	10.1507	1.07036	19.0759	0.622688	1.96596	0.8536	1.60071	0.719137	10.4141	0.0446867	1.97632	0.996815	1.59634	1.23654	0.876918	8.51205	9.78257	1.42939	1
2.03197	9.59821	7.88298	9.60377	1.04424	0.514354	10.172	9.98943	17.2487	9.38504	8.89637	0.8536	10.2679	9.81832	8.91973	8.4685	1.97632	0.996815	1.59634	1.23654	0.876918	10.3187	1.77344	10.033	1
2.03197	1.54995	1.40543	1.43958	8.5419	0.514354	0.773531	1.07036	16.8696	9.7973	1.96596	0.8536	1.60071	0.719137	9.8367	7.99401	1.97632	0.996815	1.59634	1.23654	0.876918	1.52246	1.77344	1.42939	1
2.03197	1.54995	10.0399	1.43958	1.04424	10.5499	0.773531	8.96255	16.7549	9.97583	11.6548	0.8536	9.40998	8.83033	1.50851	0.0446867	1.97632	9.08946	9.42174	1.23654	0.876918	1.52246	9.78183	8.97763	0
2.03197	9.80531	7.33902	1.43958	9.70568	11.4049	8.3716	10.8002	17.9032	10.3198	10.24	0.8536	10.5669	10.2765	1.50851	0.0446867	9.35326	8.55667	9.71602	1.23654	0.876918	1.52246	9.08398	10.3074	0
2.03197	1.54995	1.40543	1.43958	1.04424	0.514354	0.773531	10.9725	16.3944	8.93752	1.96596	0.8536	1.60071	10.0438	1.50851	0.0446867	1.97632	0.996815	9.78816	1.23654	0.876918	1.52246	1.77344	1.42939	0
9.91805	1.54995	1.40543	9.33321	10.2557	10.9478	8.82867	11.224	16.2038	9.97282	11.0907	9.07003	1.60071	0.719137	1.50851	0.0446867	9.44455	8.22415	1.59634	1.23654	0.876918	1.52246	11.6498	10.7995	0
2.03197	10.3337	8.44759	1.43958	9.84968	10.6884	0.773531	10.3502	16.3963	0.622688	10.9005	0.8536	10.9088	8.84019	1.50851	0.0446867	1.97632	0.996815	1.59634	1.23654	0.876918	1.52246	10.8351	11.2596	0
2.03197	10.9874	1.40543	9.74156	1.04424	0.514354	8.21489	10.3695	16.449	8.81976	10.0558	8.64426	9.04775	9.07097	1.50851	0.0446867	1.97632	0.996815	1.59634	9.35686	0.876918	1.52246	1.77344	1.42939	0
2.03197	9.26515	9.17964	1.43958	1.04424	9.06615	0.773531	1.07036	16.5773	10.3568	1.96596	9.53704	1.60071	0.719137	1.50851	0.0446867	1.97632	8.71921	1.59634	10.4573	0.876918	1.52246	1.77344	9.79636	0
2.03197	1.54995	8.87525	1.43958	1.04424	10.6948	0.773531	10.8427	16.2034	9.99145	11.9366	0.8536	1.60071	0.719137	1.50851	0.0446867	1.97632	0.996815	8.48072	1.23654	0.876918	1.52246	1.77344	1.42939	0
2.03197	9.95709	1.40543	9.82063	9.84783	10.0021	0.773531	10.6501	17.2305	8.73697	10.7377	9.01601	9.81375	9.0405	1.50851	0.0446867	1.97632	7.33568	1.59634	8.72088	0.876918	1.52246	1.77344	1.42939	0
2.03197	8.21215	7.76653	1.43958	7.70738	9.94304	7.75115	11.3633	16.2925	9.77199	11.8587	0.8536	8.51149	9.2419	1.50851	0.0446867	1.97632	10.1766	9.63464	9.01266	0.876918	1.52246	10.0842	1.42939	0
2.03197	1.54995	1.40543	1.43958	10.0265	10.2462	9.55276	10.7744	15.3646	10.5995	11.2749	0.8536	9.70307	0.719137	1.50851	0.0446867	1.97632	0.996815	9.61427	9.34624	0.876918	1.52246	10.4885	10.1575	0
2.03197	1.54995	1.40543	1.43958	9.6409	0.514354	9.1752	9.91573	16.2277	10.4429	1.96596	0.8536	10.1575	9.93207	1.50851	0.0446867	1.97632	0.996815	1.59634	9.10763	0.876918	1.52246	10.1944	1.42939	0
9.18942	1.54995	1.40543	1.43958	9.27054	11.1927	0.773531	10.2236	16.7067	10.0842	1.96596	0.8536	1.60071	9.82374	1.50851	0.0446867	1.97632	0.996815	1.59634	9.73134	0.876918	1.52246	10.0443	10.4548	0
2.03197	9.10414	8.20841	1.43958	10.5305	9.95315	0.773531	9.72421	17.0617	9.75041	9.81897	0.8536	10.6947	0.719137	1.50851	0.0446867	1.97632	0.996815	9.65038	8.82979	0.876918	1.52246	9.90153	1.42939	0
2.03197	9.27724	1.40543	9.53003	10.0485	11.028	9.3068	10.2977	16.4537	10.0724	1.96596	8.80415	10.8586	0.719137	1.50851	0.0446867	10.3067	0.996815	1.59634	1.23654	0.876918	1.52246	10.102	1.42939	0
2.03197	1.54995	1.40543	1.43958	1.04424	9.90772	0.773531	9.30385	21.2874	9.31066	9.76284	9.48907	8.89136	8.61266	1.50851	0.0446867	1.97632	0.996815	8.68401	1.23654	0.876918	1.52246	1.77344	1.42939	0
2.03197	9.83807	1.40543	1.43958	1.04424	9.21001	9.9071	10.1332	16.5617	9.37944	9.6863	10.3002	11.0725	0.719137	1.50851	0.0446867	9.73515	0.996815	9.4322	9.23637	0.876918	8.84422	10.1039	1.42939	0
9.61744	10.4622	9.71789	1.43958	1.04424	9.99623	7.11669	1.07036	21.1757	9.87202	11.3237	0.8536	10.5538	9.52632	1.50851	0.0446867	1.97632	0.996815	7.15986	1.23654	0.876918	1.52246	9.88671	9.04125	0
2.03197	9.96844	1.40543	1.43958	8.78104	0.514354	9.45394	10.0655	16.9826	10.1929	11.1236	0.8536	1.60071	0.719137	1.50851	0.0446867	1.97632	10.1395	9.67676	10.3492	0.876918	8.30971	11.1602	10.4565	0
8.91365	1.54995	1.40543	1.43958	1.04424	0.514354	0.773531	10.465	19.093	10.186	1.96596	0.8536	1.60071	10.4417	1.50851	0.0446867	1.97632	0.996815	1.59634	1.23654	0.876918	1.52246	12.0827	1.42939	0
2.03197	1.54995	1.40543	1.43958	9.67508	7.97631	0.773531	10.5437	16.5615	9.38281	11.1736	9.52694	8.65483	8.56166	1.50851	0.0446867	1.97632	8.64842	9.62018	9.96792	0.876918	1.52246	11.4578	10.3778	0
2.03197	1.54995	1.40543	1.43958	1.04424	10.3637	8.06059	9.12833	16.3716	9.43819	10.5116	0.8536	9.70704	10.8622	1.50851	0.0446867	9.06354	7.90677	10.2053	1.23654	0.876918	1.52246	10.3633	1.42939	0
9.07509	10.3159	1.40543	1.43958	8.66545	10.3921	8.84852	10.3918	16.6793	9.36988	10.6034	0.8536	9.46325	9.62742	1.50851	0.0446867	1.97632	0.996815	8.4552	9.54974	0.876918	1.52246	1.77344	10.628	0
9.35114	1.54995	1.40543	1.43958	1.04424	9.54758	10.1021	9.95833	16.3893	10.0898	1.96596	9.83919	10.7612	8.41221	1.50851	0.0446867	1.97632	0.996815	1.59634	1.23654	0.876918	1.52246	1.77344	9.24922	0
2.03197	9.70052	1.40543	1.43958	8.88396	12.3442	9.0592	1.07036	16.0345	8.92101	9.47504	0.8536	1.60071	0.719137	1.50851	0.0446867	1.97632	0.996815	1.59634	1.23654	0.876918	1.52246	1.77344	11.4717	0
2.03197	8.31999	1.40543	1.43958	9.33322	11.5329	9.31874	10.4881	17.5273	9.52185	10.8122	0.8536	11.055	9.98811	1.50851	0.0446867	1.97632	8.62091	9.04286	8.64211	0.876918	1.52246	10.6817	9.39243	0
8.702	10.3775	1.40543	1.43958	1.04424	10.4575	0.773531	10.022	17.2545	10.3568	10.7583	8.96675	11.0524	0.719137	1.50851	0.0446867	1.97632	8.30737	9.31078	1.23654	0.876918	1.52246	1.77344	9.15191	0
9.83462	9.30515	1.40543	10.0571	1.04424	10.5468	10.5709	10.2823	16.1612	8.49247	1.96596	0.8536	10.3378	9.75194	1.50851	0.0446867	1.97632	0.996815	6.8059	1.23654	0.876918	7.72078	10.067	10.2927	0
8.4054	8.48209	1.40543	9.19712	9.2277	9.9131	9.95629	9.72065	15.7871	9.62796	11.2101	0.8536	10.3013	9.06618	8.36359	0.0446867	9.76038	0.996815	9.81651	7.93891	0.876918	1.52246	9.82784	9.93387	0
2.03197	10.0584	9.67236	1.43958	1.04424	10.4961	0.773531	10.3406	17.1819	10.0113	1.96596	8.65396	9.78964	9.90381	9.37718	0.0446867	1.97632	0.996815	1.59634	1.23654	0.876918	1.52246	1.77344	1.42939	0
2.03197	8.80971	8.2307	8.96622	9.18418	8.94218	0.773531	10.1372	17.4265	8.52842	1.96596	8.73758	8.4579	8.98625	1.50851	0.0446867	1.97632	0.996815	8.60228	9.01972	0.876918	1.52246	8.7001	8.6277	0
2.03197	9.15664	1.40543	1.43958	8.81407	9.52612	7.1419	10.5896	16.3168	7.85176	10.569	9.45353	11.0886	9.53141	1.50851	0.0446867	1.97632	9.86517	9.45072	9.2081	0.876918	1.52246	10.5902	10.1924	0
2.03197	10.6547	10.111	1.43958	10.2058	10.978	0.773531	10.7434	16.0942	10.5691	10.8632	8.9921	10.2448	9.03957	1.50851	0.0446867	1.97632	0.996815	8.13546	1.23654	0.876918	8.05807	1.77344	10.5977	0
2.03197	10.8783	1.40543	1.43958	9.58497	10.1239	0.773531	9.92248	15.2135	9.13343	10.8181	0.8536	10.2836	9.83666	1.50851	0.0446867	1.97632	9.16225	1.59634	10.4626	0.876918	1.52246	1.77344	9.00384	0
2.03197	1.54995	1.40543	1.43958	9.66156	8.79534	0.773531	1.07036	16.2892	9.2345	11.5693	0.8536	10.6254	9.5003	1.50851	0.0446867	1.97632	0.996815	1.59634	8.66221	0.876918	1.52246	11.0576	9.14784	0
1.12629	1.95913	0.683345	10.6562	1.07572	1.98399	1.1184	9.26531	17.9375	0.360917	11.3873	1.7499	0.464075	0.394163	1.93887	1.11467	1.47891	1.27731	0.500486	1.4484	8.7288	9.27566	1.04747	9.88148	1
1.12629	1.95913	0.683345	11.2869	1.07572	1.98399	11.1916	10.9918	18.3555	9.69694	11.7365	1.7499	0.464075	0.394163	11.4059	10.4368	1.47891	1.27731	0.500486	1.4484	9.81579	10.1232	8.9685	0.776755	1
1.12629	1.95913	0.683345	10.2656	1.07572	1.98399	10.5893	6.79534	17.3126	0.360917	9.89514	1.7499	8.86567	0.394163	10.901	1.11467	1.47891	1.27731	0.500486	1.4484	9.51936	1.77405	1.04747	9.00267	1
8.95647	1.95913	0.683345	10.606	9.16382	10.578	11.3385	9.44928	17.278	9.48814	1.11138	1.7499	5.8261	9.20856	10.2014	1.11467	1.47891	1.27731	0.500486	1.4484	0.643135	1.77405	1.04747	0.776755	1
1.12629	1.95913	7.92665	11.3841	1.07572	1.98399	10.6238	8.5059	16.412	9.30597	10.9154	9.99958	9.33842	0.394163	10.5763	1.11467	1.47891	1.27731	0.500486	1.4484	8.19673	9.00454	1.04747	0.776755	1
1.12629	10.6862	0.683345	11.4912	1.07572	1.98399	9.86082	9.76942	17.1827	7.9989	10.0743	1.7499	0.464075	0.394163	10.7208	9.60696	1.47891	1.27731	9.97368	1.4484	0.643135	1.77405	1.04747	0.776755	1
1.12629	1.95913	0.683345	10.5077	1.07572	1.98399	10.0782	10.1414	17.5855	7.94474	10.2288	1.7499	9.55123	0.394163	9.95016	10.4864	1.47891	1.27731	8.90895	1.4484	0.643135	1.77405	9.10309	0.776755	1
1.12629	1.95913	0.683345	10.2303	1.07572	1.98399	1.1184	0.290737	16.9203	11.0132	9.82487	1.7499	7.71436	0.394163	9.13202	9.59142	1.47891	1.27731	0.500486	1.4484	10.1312	1.77405	11.0496	10.0871	1
6.76945	8.32089	7.55392	10.1355	1.07572	1.98399	10.5506	9.46498	15.7759	9.33916	1.11138	7.18527	9.0671	8.69624	10.5396	8.91681	1.47891	8.11308	8.67385	1.4484	8.70358	8.87984	9.51387	8.41609	1
1.12629	9.0246	0.683345	9.51021	1.07572	1.98399	8.78866	9.12492	20.948	0.360917	1.11138	1.7499	8.17197	9.02998	10.8701	8.99523	1.47891	1.27731	0.500486	1.4484	9.27181	1.77405	1.04747	0.776755	1
1.12629	1.95913	0.683345	10.1572	1.07572	1.98399	1.1184	0.290737	18.756	9.45332	1.11138	1.7499	0.464075	0.394163	1.93887	1.11467	1.47891	1.27731	0.500486	1.4484	0.643135	9.64398	1.04747	0.776755	1
1.12629	1.95913	8.14332	11.7442	8.2244	1.98399	7.27198	0.290737	17.3023	9.68755	1.11138	1.7499	8.86099	0.394163	9.78753	10.4082	1.47891	1.27731	0.500486	1.4484	9.46334	9.32594	1.04747	8.30527	1
1.12629	1.95913	0.683345	11.0843	1.07572	1.98399	1.1184	8.42185	17.5962	9.98023	1.11138	1.7499	0.464075	9.7066	1.93887	1.11467	1.47891	1.27731	8.89076	1.4484	0.643135	1.77405	1.04747	0.776755	1
1.12629	8.01729	0.683345	0.963203	1.07572	1.98399	10.6918	8.99166	16.989	9.39173	1.11138	1.7499	0.464075	9.71626	10.6665	1.11467	1.47891	1.27731	0.500486	1.4484	0.643135	1.77405	1.04747	0.776755	1
1.12629	1.95913	0.683345	11.2871	1.07572	1.98399	10.8949	0.290737	17.0244	8.62202	1.11138	1.7499	0.464075	0.394163	1.93887	9.62551	1.47891	1.27731	9.10729	1.4484	0.643135	1.77405	1.04747	0.776755	1
1.12629	9.45779	0.683345	10.0471	1.07572	1.98399	10.1017	8.84257	17.7489	8.71966	1.11138	1.7499	7.38824	0.394163	9.448	1.11467	1.47891	1.27731	8.32062	8.89498	0.643135	1.77405	1.04747	0.776755	1
1.12629	1.95913	0.683345	10.8013	10.3812	12.0668	1.1184	0.290737	18.3671	0.360917	9.63631	1.7499	8.46331	10.1607	10.8014	1.11467	1.47891	1.27731	0.500486	1.4484	0.643135	1.77405	1.04747	9.69678	1
1.12629	11.0827	0.683345	0.963203	9.48727	1.98399	1.1184	9.34622	17.4323	9.23815	1.11138	1.7499	6.26371	9.67242	1.93887	1.11467	1.47891	8.86667	8.05504	10.32	0.643135	1.77405	9.61209	10.7707	0
8.91076	9.9833	0.683345	0.963203	1.07572	12.6693	9.74375	9.91222	18.0004	8.92982	1.11138	1.7499	0.464075	10.5535	1.93887	1.11467	1.47891	1.27731	0.500486	1.4484	0.643135	1.77405	9.8807	0.776755	0
1.12629	10.4605	8.74484	8.11405	1.07572	1.98399	8.78544	9.55768	17.0582	9.21123	1.11138	1.7499	8.25425	9.35731	1.93887	1.11467	1.47891	1.27731	0.500486	10.666	0.643135	7.39075	9.87552	9.05869	0
8.16578	1.95913	0.683345	0.963203	9.12598	9.80818	10.2076	9.12021	16.9904	9.27315	1.11138	1.7499	0.464075	9.78558	9.55928	1.11467	1.47891	8.96274	9.06746	1.4484	0.643135	1.77405	7.97807	9.54607	0
1.12629	9.04336	10.6802	0.963203	10.4509	10.9693	9.5291	8.97767	21.0233	9.81684	1.11138	1.7499	0.464075	9.19185	1.93887	1.11467	1.47891	1.27731	9.70325	1.4484	0.643135	8.33314	1.04747	10.1435	0
1.12629	1.95913	0.683345	0.963203	1.07572	1.98399	1.1184	9.5714	17.3163	10.1112	1.11138	1.7499	8.05618	8.8965	1.93887	1.11467	1.47891	10.3609	9.20815	1.4484	0.643135	1.77405	9.31514	9.34066	0
1.12629	1.95913	0.683345	0.963203	8.60643	11.4833	10.1029	9.98558	17.9067	8.73527	10.4844	8.96583	7.74413	10.0539	1.93887	1.11467	1.47891	1.27731	8.78683	9.93281	0.643135	1.77405	9.29409	0.776755	0
1.12629	9.22489	8.28406	0.963203	1.07572	10.5444	9.01591	9.79916	17.0799	9.43759	10.5977	9.30357	7.90159	10.3517	1.93887	1.11467	10.4985	9.45371	9.19922	9.42107	0.643135	1.77405	8.2348	10.5753	0
10.0535	1.95913	0.683345	0.963203	10.441	1.98399	9.04744	9.74651	17.42	9.77073	1.11138	1.7499	7.02866	10.1268	1.93887	1.11467	1.47891	1.27731	0.500486	9.5903	0.643135	1.77405	1.04747	11.529	0
8.84521	1.95913	0.683345	0.963203	9.79198	10.5722	1.1184	10.3222	17.8178	10.0063	9.45792	1.7499	8.96061	0.394163	1.93887	1.11467	1.47891	8.94734	0.500486	9.623	0.643135	1.77405	1.04747	8.79543	0
1.12629	9.96761	0.683345	0.963203	1.07572	12.4208	8.65323	8.30806	17.1503	8.23898	10.9982	1.7499	8.17686	9.52158	1.93887	1.11467	8.75839	1.27731	8.51122	9.24061	0.643135	1.77405	7.22942	9.21787	0
1.12629	9.87024	8.50859	0.963203	10.5976	10.831	10.0081	9.55866	16.9786	9.22006	7.79625	1.7499	8.56822	9.18935	1.93887	1.11467	5.28349	1.27731	0.500486	1.4484	0.643135	1.77405	9.06529	0.776755	0
1.12629	10.5279	0.683345	8.91796	10.0448	11.4472	9.70305	0.290737	17.7729	9.18052	10.1	1.7499	8.31953	8.30471	1.93887	1.11467	8.60854	1.27731	8.34914	1.4484	0.643135	1.77405	7.74509	9.56303	0
8.69888	1.95913	0.683345	0.963203	1.07572	12.6995	1.1184	9.94346	16.8501	9.4377	9.8097	1.7499	9.68007	10.1107	1.93887	1.11467	9.37119	1.27731	0.500486	1.4484	0.643135	1.77405	1.04747	0.776755	0
1.12629	1.95913	8.59391	0.963203	1.07572	1.98399	9.9861	8.08501	17.5146	0.360917	1.11138	1.7499	7.76926	0.394163	1.93887	8.80156	1.47891	1.27731	7.76129	1.4484	0.643135	1.77405	10.1216	0.776755	0
8.67617	1.95913	6.81538	0.963203	9.62312	1.98399	7.91945	10.3571	17.1249	9.20669	9.0854	1.7499	9.52091	9.01724	1.93887	1.11467	8.93286	1.27731	0.500486	1.4484	0.643135	1.77405	1.04747	9.47424	0
9.24289	1.95913	0.683345	0.963203	9.67776	11.5193	1.1184	10.0581	16.456	9.51653	10.7671	1.7499	6.64424	9.16905	1.93887	1.11467	1.47891	1.27731	8.94391	1.4484	0.643135	1.77405	8.96548	0.776755	0
1.12629	1.95913	0.683345	0.963203	1.07572	12.833	10.3058	8.42199	18.0292	9.70841	10.6467	1.7499	9.35392	0.394163	1.93887	1.11467	1.47891	1.27731	0.500486	9.68541	0.643135	1.77405	9.06854	0.776755	0
1.12629	1.95913	0.683345	0.963203	9.63747	1.98399	1.1184	10.3892	17.1871	8.25905	10.8036	1.7499	8.57842	8.4448	1.93887	1.11467	1.47891	6.66051	9.52234	8.87633	0.643135	1.77405	8.9592	7.8974	0
Supp. Data8.Tab8 U2OS cell representation by DEP expression profile from maxlfq view. The last column is the labels of the cells.
X0	X1	X2	X3	X4	X5	X6	X7	X8	X9	X10	X11	X12	X13	X14	label
1.27163	7.4689	1.00326	0.434949	6.64928	7.95869	0.377194	8.59165	7.62219	7.69482	1.47277	1.44916	0.78655	1.20076	0.744096	1
1.27163	1.28796	1.00326	7.35842	7.24568	0.981778	0.377194	1.51266	1.55608	0.711928	7.57517	1.44916	0.78655	1.20076	0.744096	1
1.27163	8.02848	1.00326	0.434949	7.16757	7.27732	0.377194	1.51266	1.55608	7.52404	8.30352	1.44916	7.90475	1.20076	7.21556	1
1.27163	6.95286	1.00326	0.434949	6.47624	7.62705	0.377194	1.51266	1.55608	7.22006	8.10945	1.44916	6.84008	1.20076	0.744096	1
1.27163	1.28796	1.00326	0.434949	0.350441	7.51153	7.29822	1.51266	1.55608	8.35302	7.96719	1.44916	7.10842	1.20076	0.744096	1
1.27163	7.67275	1.00326	0.434949	6.74234	0.981778	6.36788	1.51266	8.62067	0.711928	1.47277	1.44916	0.78655	1.20076	6.37277	1
7.84707	1.28796	1.00326	0.434949	0.350441	8.31647	7.87869	1.51266	8.64004	7.13268	1.47277	1.44916	0.78655	1.20076	7.89277	1
1.27163	1.28796	1.00326	0.434949	6.17721	0.981778	5.76114	1.51266	1.55608	0.711928	1.47277	1.44916	0.78655	1.20076	0.744096	1
1.27163	7.7253	1.00326	0.434949	7.63495	7.55713	6.61748	1.51266	1.55608	0.711928	8.39267	1.44916	0.78655	6.6922	7.46571	1
1.27163	1.28796	1.00326	7.71973	7.21658	0.981778	7.39784	1.51266	1.55608	0.711928	8.70243	1.44916	0.78655	1.20076	0.744096	1
8.36325	8.08961	1.00326	0.434949	7.42872	0.981778	7.34231	6.48498	1.55608	0.711928	8.47836	1.44916	0.78655	1.20076	7.86497	1
1.27163	8.37762	8.47068	0.434949	7.36316	6.87456	0.377194	1.51266	1.55608	0.711928	8.34008	1.44916	0.78655	1.20076	0.744096	1
1.27163	1.28796	1.00326	0.434949	5.63216	0.981778	0.377194	1.51266	1.55608	7.46973	1.47277	1.44916	0.78655	7.49326	6.80356	1
1.27163	8.68811	1.00326	5.32753	7.75071	0.981778	6.71932	7.39676	1.55608	0.711928	8.24309	7.57049	0.78655	1.20076	7.93159	1
7.7548	8.53152	1.00326	0.434949	6.84287	8.06115	7.67033	1.51266	1.55608	7.15697	8.59594	1.44916	0.78655	8.04	7.11538	1
1.27163	8.13046	5.84845	0.434949	7.7337	0.981778	6.76799	1.51266	1.55608	5.95141	1.47277	1.44916	6.98565	1.20076	0.744096	1
1.27163	9.31592	1.00326	6.2276	6.76403	7.15337	6.56295	1.51266	1.55608	7.16355	8.17574	1.44916	0.78655	8.47063	8.16393	1
1.27163	8.72002	1.00326	8.25797	0.350441	8.45227	6.55753	7.288	1.55608	7.40108	8.73264	1.44916	8.52905	1.20076	8.42826	1
1.27163	8.48956	7.10124	7.6004	0.350441	7.33081	7.6968	1.51266	8.51947	7.79918	7.93974	7.10686	7.57474	1.20076	7.28083	1
1.27163	1.28796	1.00326	0.434949	6.31732	7.90938	7.71814	1.51266	7.83778	0.711928	1.47277	1.44916	0.78655	1.20076	6.47607	1
1.27163	6.13306	1.00326	0.434949	6.6293	7.05022	7.59986	1.51266	9.08119	6.99983	9.28802	1.44916	0.78655	1.20076	5.99379	1
1.27163	8.83738	7.66169	0.434949	8.72163	8.10246	7.00594	1.51266	7.37028	0.711928	8.85923	1.44916	7.03547	1.20076	5.50696	1
1.27163	8.44228	1.00326	0.434949	6.76171	0.981778	0.377194	7.93764	7.25494	0.711928	8.21419	1.44916	6.75635	1.20076	6.57234	1
1.27163	1.28796	6.92026	0.434949	7.12195	7.6727	6.82811	6.63506	1.55608	0.711928	7.78365	1.44916	6.93478	1.20076	5.83004	1
1.27163	8.51045	1.00326	0.434949	7.36418	6.05185	0.377194	1.51266	1.55608	6.54128	7.59336	1.44916	0.78655	1.20076	0.744096	1
1.27163	8.75918	6.99073	0.434949	7.81767	0.981778	6.29704	1.51266	1.55608	8.04053	9.1898	1.44916	7.43143	7.68428	7.1646	1
1.27163	8.43367	1.00326	0.434949	7.01385	6.97342	0.377194	1.51266	7.2174	6.89865	8.70419	1.44916	0.78655	1.20076	0.744096	1
1.27163	7.96461	1.00326	0.434949	6.01983	7.96469	6.97723	7.61408	1.55608	6.75104	1.47277	1.44916	0.78655	1.20076	7.35604	1
1.27163	8.56575	1.00326	7.09548	6.20978	7.766	6.72941	1.51266	1.55608	0.711928	8.09237	8.35044	6.38095	1.20076	0.744096	1
1.27163	8.52391	7.00469	7.17141	7.12123	7.1385	6.82171	1.51266	1.55608	0.711928	8.45448	1.44916	0.78655	1.20076	8.11838	1
1.27163	9.26976	1.00326	7.00818	6.85631	8.21069	6.05693	1.51266	7.48915	0.711928	8.43628	1.44916	6.21935	7.6038	0.744096	1
7.92241	9.37494	8.20567	6.49546	6.39805	7.68883	0.377194	1.51266	8.26968	7.49711	8.64036	9.01981	7.14223	1.20076	7.37847	1
7.88548	8.1239	1.00326	0.434949	7.10216	7.21311	0.377194	1.51266	1.55608	0.711928	7.65703	1.44916	0.78655	1.20076	7.33596	1
1.27163	8.29933	1.00326	0.434949	7.04776	0.981778	5.89914	7.98195	8.60117	0.711928	8.03839	1.44916	6.04079	1.20076	0.744096	1
1.27163	1.28796	1.00326	0.434949	0.350441	0.981778	0.377194	1.51266	1.55608	0.711928	1.47277	1.44916	0.78655	1.20076	8.27321	1
7.08855	7.70356	1.00326	0.434949	7.1368	0.981778	0.377194	1.51266	1.55608	6.00495	8.64731	1.44916	7.30906	1.20076	6.78221	1
6.84188	1.28796	1.00326	0.434949	0.350441	0.981778	0.377194	1.51266	1.55608	0.711928	8.91017	1.44916	0.78655	7.55072	7.65787	1
7.91198	7.34337	1.00326	0.434949	0.350441	8.07133	7.41302	7.32682	8.66081	7.87686	7.6709	1.44916	0.78655	1.20076	7.92041	1
1.27163	1.28796	7.84657	0.434949	7.18718	0.981778	6.87982	1.51266	1.55608	0.711928	8.36652	1.44916	0.78655	1.20076	6.96946	1
1.27163	1.28796	1.00326	7.64435	7.8782	6.68329	7.70164	8.47533	8.43824	7.74212	1.47277	7.98248	0.78655	7.78703	8.23424	0
7.82848	1.28796	7.83947	8.50911	7.16857	8.54001	7.6809	8.19829	8.50972	7.86914	1.47277	8.30346	0.78655	7.21824	7.24218	0
1.27163	1.28796	1.00326	0.434949	7.46999	8.3332	5.43111	1.51266	1.55608	7.70643	1.47277	7.38769	0.78655	1.20076	0.744096	0
1.27163	8.40455	7.78015	7.67158	7.06464	8.53045	7.01049	7.24434	1.55608	0.711928	1.47277	1.44916	0.78655	8.60922	7.40372	0
7.93917	1.28796	7.93393	7.69282	7.16982	8.25324	0.377194	7.87269	8.73729	7.60677	1.47277	1.44916	0.78655	8.23614	0.744096	0
8.84275	7.73727	1.00326	0.434949	7.0254	7.97643	6.79052	7.71748	7.71116	7.40128	1.47277	1.44916	0.78655	1.20076	6.90785	0
8.02812	1.28796	1.00326	6.85408	7.35022	0.981778	7.28398	1.51266	1.55608	0.711928	1.47277	1.44916	0.78655	1.20076	7.74114	0
1.27163	1.28796	1.00326	7.5437	7.17854	7.82806	7.44557	8.52502	1.55608	0.711928	1.47277	7.43887	0.78655	1.20076	7.52351	0
7.49484	7.44718	7.0739	7.35627	7.19257	7.99269	6.55032	7.64354	8.42021	6.38556	1.47277	1.44916	0.78655	1.20076	7.77482	0
7.42005	1.28796	7.37696	7.70687	8.04004	8.71034	7.03706	9.19609	8.47662	7.37118	1.47277	8.19768	0.78655	6.94779	7.3138	0
1.27163	1.28796	7.65828	6.96926	7.57357	8.08524	7.53085	8.19345	7.74786	0.711928	1.47277	7.55735	0.78655	7.55335	0.744096	0
1.27163	1.28796	7.91354	0.434949	7.0899	7.5865	7.56028	1.51266	8.42637	8.08709	1.47277	1.44916	0.78655	7.16858	7.35419	0
1.27163	1.28796	6.28014	8.2423	7.89197	7.70925	5.9166	1.51266	1.55608	7.49598	1.47277	1.44916	0.78655	7.61192	7.04252	0
6.91648	1.28796	7.66946	7.08205	7.21084	8.23036	6.62626	7.9283	8.47848	0.711928	1.47277	7.91325	0.78655	6.90158	7.16726	0
8.2578	8.60034	7.95505	7.80393	7.31007	7.52104	7.30678	1.51266	8.97248	0.711928	1.47277	1.44916	0.78655	7.67965	7.92524	0
1.27163	1.28796	1.00326	7.19504	7.1498	6.88069	7.1945	6.92031	7.58352	6.80721	1.47277	7.28032	0.78655	1.20076	7.72363	0
7.45474	1.28796	1.00326	6.29665	7.27747	7.29995	6.80043	7.45771	8.37785	0.711928	1.47277	8.32173	0.78655	7.59446	7.63912	0
7.84528	1.28796	1.00326	7.23344	7.95414	0.981778	6.94886	7.89852	8.55774	7.42916	1.47277	7.13704	0.78655	7.54367	7.16699	0
7.82126	1.28796	6.80131	0.434949	6.83415	7.15315	8.23297	7.96792	1.55608	0.711928	1.47277	7.6725	0.78655	8.01095	6.90986	0
1.27163	1.28796	1.00326	0.434949	6.71603	7.8467	8.16918	1.51266	1.55608	7.58938	1.47277	6.01473	0.78655	8.69657	7.61938	0
1.27163	1.28796	7.81669	4.79021	6.84914	7.75653	7.10475	8.14611	8.57274	6.37397	1.47277	7.21205	0.78655	8.96878	7.70928	0
1.27163	1.28796	1.00326	7.1017	7.51145	6.44741	7.34249	7.79642	8.12703	8.64935	1.47277	1.44916	0.78655	7.91132	7.58003	0
7.65427	1.28796	6.97539	7.43845	7.57059	7.20481	7.58199	7.64568	8.26719	7.71309	1.47277	7.39213	0.78655	7.69521	7.81157	0
1.27163	1.28796	1.00326	6.58858	7.49751	7.51828	0.377194	1.51266	8.25427	6.33294	1.47277	1.44916	0.78655	1.20076	7.86066	0
6.94206	1.28796	6.46485	7.30038	6.35304	0.981778	6.56658	7.19518	1.55608	0.711928	1.47277	1.44916	0.78655	1.20076	7.58526	0
6.91691	1.28796	7.3906	8.2118	7.21759	7.90224	7.21224	8.26257	8.86081	7.77794	1.47277	7.67893	0.78655	8.26156	7.56703	0
8.23852	1.28796	1.00326	7.23269	6.99629	8.28341	7.11373	7.96152	8.61924	0.711928	1.47277	7.38784	0.78655	1.20076	8.19665	0
7.53732	7.68278	1.00326	7.42971	7.82211	7.5464	6.51285	1.51266	8.49744	7.52404	1.47277	6.97341	0.78655	7.99474	7.54902	0
7.95242	7.38183	8.2378	7.5335	7.84095	8.12472	6.92641	8.56684	9.10244	7.23669	7.43658	8.59604	0.78655	7.97245	7.23883	0
7.44701	1.28796	1.00326	7.5853	7.02343	7.66724	6.96936	1.51266	8.07658	7.90781	7.85938	1.44916	0.78655	1.20076	7.3409	0
6.71141	7.40285	7.38955	6.6932	7.50261	7.60909	6.28015	1.51266	7.3112	6.87066	1.47277	6.94155	0.78655	6.88647	6.02622	0
8.16743	1.28796	6.80351	6.93998	8.18293	8.3447	6.71249	8.2226	9.28794	7.86229	1.47277	6.02232	0.78655	8.03382	8.23435	0
9.39994	1.28796	7.85592	7.90244	7.03174	8.48893	7.71294	8.43628	8.75935	7.30057	1.47277	1.44916	0.78655	1.20076	7.77948	0
8.54632	1.28796	7.82469	7.3985	8.07613	8.12935	6.40931	8.46724	8.35685	7.87072	1.47277	1.44916	0.78655	1.20076	7.56674	0
1.27163	1.28796	7.78564	6.48505	5.89317	0.981778	7.56188	8.26131	8.59331	7.05703	1.47277	1.44916	0.78655	7.85723	7.57684	0
1.65578	8.13961	0.880147	1.45287	6.94411	6.78338	0.526086	8.33161	0.429437	0.433795	1.64055	0.67655	6.58573	1.00709	6.58909	1
1.65578	8.52014	0.880147	1.45287	7.43367	7.66337	7.48107	8.12577	0.429437	0.433795	8.94661	0.67655	7.65391	6.38831	8.05486	1
1.65578	7.77702	0.880147	1.45287	8.11606	5.92484	0.526086	6.91153	7.44437	0.433795	8.49298	0.67655	7.18142	1.00709	7.38479	1
1.65578	8.18283	6.1762	7.87552	0.816508	6.70544	6.98495	0.875122	5.77054	6.88759	7.95644	0.67655	0.57992	1.00709	7.91671	1
1.65578	8.60387	0.880147	1.45287	8.07952	6.10868	0.526086	8.07219	6.49046	0.433795	8.77081	0.67655	7.26315	1.00709	7.81858	1
7.66857	9.20057	0.880147	1.45287	0.816508	7.30184	6.11335	6.93443	0.429437	0.433795	8.44133	8.04295	0.57992	1.00709	7.11925	1
1.65578	8.63963	0.880147	1.45287	7.93942	7.76484	7.19038	7.42024	7.84671	0.433795	8.39246	7.56119	0.57992	7.49275	7.62465	1
1.65578	7.91722	0.880147	1.45287	7.91281	0.431377	0.526086	7.5582	7.31067	0.433795	8.56224	0.67655	7.66163	8.31059	7.87022	1
8.02518	8.4831	0.880147	1.45287	8.00642	7.58978	7.60831	0.875122	7.85702	7.47074	9.32224	6.53811	7.29453	7.75466	7.89087	1
7.39788	7.31674	0.880147	1.45287	7.2677	7.0294	0.526086	0.875122	6.52682	7.2609	8.87126	0.67655	6.57341	1.00709	0.635811	1
1.65578	7.68773	0.880147	1.45287	0.816508	0.431377	7.19826	0.875122	0.429437	0.433795	1.64055	0.67655	0.57992	1.00709	0.635811	1
1.65578	9.16506	6.77469	1.45287	7.86629	0.431377	7.84622	0.875122	7.15789	0.433795	8.03231	0.67655	7.7861	1.00709	0.635811	1
1.65578	8.55433	0.880147	1.45287	6.79111	6.42403	0.526086	0.875122	0.429437	7.52759	1.64055	6.7409	0.57992	1.00709	0.635811	1
7.61458	0.941588	0.880147	1.45287	7.59568	6.90516	7.25108	0.875122	0.429437	8.35917	8.08675	0.67655	0.57992	1.00709	7.96616	1
1.65578	8.60979	0.880147	1.45287	0.816508	0.431377	7.10486	0.875122	0.429437	0.433795	1.64055	0.67655	0.57992	1.00709	0.635811	1
6.91162	7.18517	0.880147	1.45287	0.816508	6.52041	6.93431	0.875122	6.51892	0.433795	7.15099	6.69762	0.57992	1.00709	8.08181	1
1.65578	7.93527	7.67803	8.27363	7.26851	0.431377	0.526086	7.62994	7.0695	7.82414	8.30205	0.67655	0.57992	1.00709	0.635811	1
8.71041	0.941588	7.77252	1.45287	7.65343	7.00301	0.526086	0.875122	6.58002	7.11262	1.64055	6.36894	0.57992	7.78597	7.49499	0
7.93585	0.941588	0.880147	8.99266	7.57014	7.19157	7.131	0.875122	0.429437	7.89297	1.64055	0.67655	0.57992	7.48808	6.97478	0
8.39273	6.11608	0.880147	1.45287	8.86367	7.53313	7.41947	0.875122	7.82288	7.13258	1.64055	0.67655	0.57992	7.93316	7.9282	0
1.65578	0.941588	7.48337	8.02615	7.11586	7.08685	7.91044	0.875122	0.429437	6.85633	7.64496	0.67655	0.57992	7.42455	6.41466	0
7.64814	0.941588	8.06585	7.07903	6.10623	6.14702	7.33851	0.875122	0.429437	6.89161	1.64055	8.65467	0.57992	1.00709	0.635811	0
1.65578	0.941588	0.880147	1.45287	0.816508	6.5685	7.54204	0.875122	6.42394	7.10241	1.64055	7.2111	0.57992	7.58034	7.28601	0
1.65578	0.941588	6.86393	7.88976	7.8342	7.69227	7.33823	7.74909	7.75168	7.80615	1.64055	7.18651	0.57992	7.17491	7.63337	0
7.74038	0.941588	0.880147	7.42624	7.95378	7.47027	7.83462	7.7488	6.55862	7.90196	1.64055	6.91956	0.57992	7.51647	0.635811	0
1.65578	0.941588	7.43463	1.45287	7.94356	7.36341	7.26155	0.875122	6.74255	7.38804	1.64055	0.67655	0.57992	1.00709	7.02897	0
1.65578	0.941588	7.10694	8.11277	7.90665	7.99076	7.63129	7.68513	6.96683	0.433795	1.64055	0.67655	0.57992	1.00709	7.37411	0
7.86525	0.941588	8.01859	8.79368	8.4458	6.85548	6.37245	7.6132	6.98063	7.0955	1.64055	0.67655	0.57992	1.00709	8.03655	0
8.27539	0.941588	8.10055	8.09344	7.9448	7.69254	7.39552	6.57077	6.90268	7.77504	1.64055	0.67655	0.57992	6.95989	6.87127	0
8.29154	8.16713	7.98917	8.63318	7.89665	0.431377	6.97582	7.86712	6.348	7.20427	7.77977	7.83085	0.57992	6.45459	7.46177	0
1.65578	0.941588	0.880147	9.12744	6.9711	7.39515	7.16703	7.56358	8.10416	7.59808	1.64055	0.67655	0.57992	1.00709	7.15769	0
1.65578	0.941588	0.880147	1.45287	7.29738	6.07273	0.526086	0.875122	7.0258	0.433795	1.64055	6.52733	0.57992	1.00709	8.04394	0
1.65578	0.941588	7.47787	1.45287	8.34026	8.45054	6.93038	7.01037	7.41292	6.71778	1.64055	0.67655	0.57992	1.00709	6.97727	0
1.65578	0.941588	7.29587	8.68278	7.64292	7.52231	7.66047	7.9815	6.89142	6.71876	1.64055	7.49184	0.57992	7.14555	7.43878	0
1.65578	0.941588	0.880147	8.67113	7.27336	6.53271	6.83205	7.92283	7.18003	0.433795	1.64055	7.26271	0.57992	7.41313	7.32717	0
1.65578	0.941588	7.18042	1.45287	7.61585	7.52446	7.30502	7.9767	7.42268	7.14465	1.64055	8.28543	0.57992	7.93161	7.24434	0
Supp. Data8.Tab9 U2OS cell representation by DEP expression profile from TOP3 view. The last column is the labels of the cells.
X0	X1	X2	X3	X4	X5	X6	X7	X8	X9	X10	X11	X12	X13	X14	X15	label
7.19496	1.43312	0.722813	7.17842	1.71008	0.144165	9.58396	14.0704	1.09879	7.86399	1.6505	0.466787	1.89635	1.87673	1.41826	1.86913	1
1.64036	1.43312	0.722813	6.69299	1.71008	0.144165	1.42408	14.567	7.81408	1.82025	1.6505	8.88043	1.89635	8.00809	1.41826	1.86913	1
8.51026	1.43312	0.722813	7.43519	9.2008	0.144165	8.0388	14.5413	1.09879	1.82025	1.6505	7.58548	9.94621	8.55612	1.41826	1.86913	1
8.01279	1.43312	0.722813	7.49659	9.70284	0.144165	6.74602	16.5725	1.09879	1.82025	1.6505	6.94253	8.02564	8.70964	1.41826	1.86913	1
1.64036	1.43312	0.722813	0.911618	9.97294	0.144165	8.53261	14.739	1.09879	1.82025	1.6505	0.466787	1.89635	8.05659	1.41826	1.86913	1
8.86255	1.43312	0.722813	0.911618	1.71008	0.144165	1.42408	18.0613	1.09879	9.27969	1.6505	8.75681	1.89635	1.87673	8.79376	1.86913	1
1.64036	1.43312	0.722813	7.90031	7.54297	0.144165	10.0425	14.0706	1.09879	8.57319	11.2689	6.22169	9.74573	1.87673	8.94184	1.86913	1
1.64036	1.43312	0.722813	7.75712	1.71008	0.144165	1.42408	17.7265	1.09879	1.82025	1.6505	0.466787	1.89635	1.87673	1.41826	1.86913	1
8.65687	1.43312	0.722813	8.65982	7.85984	0.144165	8.13834	14.2792	1.09879	1.82025	8.7058	8.29335	10.2583	8.70608	1.41826	7.72712	1
1.64036	1.43312	0.722813	7.79427	1.71008	0.144165	1.42408	13.8647	1.09879	1.82025	8.6047	0.466787	11.5599	8.89483	6.41828	1.86913	1
9.0068	1.43312	0.722813	9.1924	9.62371	0.144165	1.42408	14.4811	1.09879	1.82025	10.3087	7.24816	10.0562	8.9798	1.41826	1.86913	1
9.10721	8.72775	0.722813	7.91164	9.71009	0.144165	6.85035	14.8498	8.32327	1.82025	7.53315	0.466787	7.06628	9.41013	7.00324	1.86913	1
1.64036	1.43312	0.722813	9.0044	10.4475	0.144165	1.42408	15.0876	1.09879	1.82025	1.6505	7.08151	1.89635	1.87673	1.41826	8.88037	1
9.06919	1.43312	7.50419	0.911618	1.71008	0.144165	1.42408	13.1795	8.21714	1.82025	9.31585	8.31855	10.2714	8.70543	8.43455	1.86913	1
8.24028	1.43312	0.722813	7.45079	1.71008	0.144165	9.87117	14.1575	1.09879	1.82025	1.6505	0.466787	1.89635	9.05288	8.05779	8.73951	1
8.03269	5.75506	0.722813	8.05119	1.71008	0.144165	1.42408	16.815	1.09879	1.82025	1.6505	7.35655	1.89635	1.87673	1.41826	1.86913	1
10.7058	1.43312	0.722813	7.52634	1.71008	0.144165	9.17228	13.6522	8.99075	1.82025	9.32294	6.53289	9.96245	9.18402	7.59153	9.61733	1
9.67463	1.43312	6.62971	7.75712	1.71008	0.144165	9.7233	14.4268	1.09879	1.82025	1.6505	0.466787	1.89635	9.1482	1.41826	1.86913	1
9.01659	7.44829	0.722813	6.88891	10.7287	0.144165	8.97098	14.8717	8.28821	8.88208	1.6505	0.466787	1.89635	8.48178	9.24482	1.86913	1
1.64036	1.43312	0.722813	0.911618	1.71008	6.60361	9.23144	15.1677	1.09879	8.60162	9.99481	0.466787	10.2887	1.87673	9.27625	1.86913	1
7.09569	1.43312	0.722813	0.911618	1.71008	0.144165	7.69088	13.4872	7.81806	9.35858	8.7058	5.92623	1.89635	9.95167	1.41826	1.86913	1
9.59574	8.21799	0.722813	8.78815	1.71008	0.144165	9.02591	14.8386	1.09879	7.23907	1.6505	8.40344	1.89635	9.24846	1.41826	1.86913	1
9.62861	1.43312	0.722813	8.56268	1.71008	0.144165	1.42408	13.7429	7.83057	8.52971	9.43083	7.03665	10.9215	8.80145	1.41826	1.86913	1
1.64036	6.75325	0.722813	0.911618	1.71008	0.144165	1.42408	14.4345	8.04011	1.82025	1.6505	0.466787	1.89635	7.26043	8.17019	1.86913	1
9.60134	1.43312	0.722813	8.93401	7.85983	0.144165	6.78164	15.6361	1.09879	1.82025	8.07678	8.31261	1.89635	8.52635	1.41826	1.86913	1
9.82953	7.50259	0.722813	8.51896	9.00471	0.144165	1.42408	14.86	8.2928	1.82025	1.6505	0.466787	1.89635	9.73706	1.41826	8.62254	1
9.30393	1.43312	0.722813	8.10146	8.69876	0.144165	6.00905	14.0219	1.09879	7.51642	1.6505	0.466787	9.61745	9.06402	1.41826	1.86913	1
9.38929	1.43312	0.722813	0.911618	12.4077	0.144165	10.0787	17.8665	1.09879	1.82025	7.17407	6.77645	9.67772	1.87673	8.76724	1.86913	1
8.93499	1.43312	8.14067	6.84237	1.71008	0.144165	9.28207	14.7683	8.78952	1.82025	1.6505	7.99818	1.89635	8.3533	1.41826	1.86913	1
9.48093	7.83691	7.76722	8.15004	10.1745	0.144165	8.64326	15.0128	7.37453	1.82025	9.4834	7.66648	1.89635	8.8394	1.41826	1.86913	1
10.4634	1.43312	0.722813	8.9831	1.71008	0.144165	1.42408	14.5389	1.09879	8.10566	9.62616	0.466787	7.32262	8.75853	8.87657	1.86913	1
10.1982	9.61304	0.722813	9.23356	1.71008	0.144165	8.79041	14.1389	9.25132	8.57515	1.6505	8.62162	1.89635	9.71591	1.41826	1.86913	1
9.01899	1.43312	0.722813	0.911618	10.6959	0.144165	8.83348	13.8203	1.09879	1.82025	7.7166	5.05176	9.61745	7.7634	8.82326	1.86913	1
9.31805	1.43312	0.722813	7.81852	1.71008	0.144165	1.42408	14.5599	1.09879	8.99019	9.22794	0.466787	8.65125	8.48362	1.41826	1.86913	1
1.64036	1.43312	0.722813	7.88891	1.71008	0.144165	1.42408	13.3834	1.09879	1.82025	8.00806	7.70521	10.1631	1.87673	1.41826	1.86913	1
8.62906	1.43312	0.722813	8.19704	1.71008	0.144165	1.42408	14.4424	8.01538	1.82025	10.0599	0.466787	9.76672	9.36655	7.98516	1.86913	1
1.64036	1.43312	0.722813	0.911618	1.71008	0.144165	1.42408	15.642	8.90133	1.82025	1.6505	6.57533	1.89635	8.87676	7.96737	1.86913	1
8.19365	1.43312	0.722813	0.911618	9.97591	0.144165	8.9079	14.5082	1.09879	8.45555	9.59303	7.08151	1.89635	8.24506	8.73541	1.86913	1
1.64036	8.30349	0.722813	0.911618	11.4188	0.144165	1.42408	13.5171	7.24854	1.82025	1.6505	0.466787	9.87363	8.5436	1.41826	1.86913	1
1.64036	1.43312	8.05663	6.40348	10.5234	7.4784	8.81641	13.4331	7.65891	8.56147	1.6505	0.466787	8.40415	1.87673	1.41826	9.10656	0
1.64036	9.84675	9.61905	0.911618	12.2529	7.14307	10.1452	12.482	9.3189	9.40604	9.9173	8.44111	9.28683	1.87673	8.58663	8.44623	0
1.64036	1.43312	0.722813	0.911618	1.71008	0.144165	9.79912	13.1824	1.09879	1.82025	1.6505	8.13214	7.94075	1.87673	8.1893	1.86913	0
8.89776	1.43312	0.722813	0.911618	9.31742	0.144165	9.86288	12.7239	8.6796	1.82025	1.6505	7.12046	1.89635	1.87673	1.41826	9.67004	0
1.64036	1.43312	0.722813	0.911618	10.475	0.144165	8.33098	13.603	1.09879	8.80649	1.6505	8.83312	8.74185	1.87673	1.41826	1.86913	0
9.20894	1.43312	0.722813	7.35458	12.5516	7.66893	10.9319	13.8342	10.1181	8.90536	10.2204	9.80378	1.89635	1.87673	7.81852	1.86913	0
1.64036	1.43312	0.722813	0.911618	10.9122	0.144165	1.42408	12.8618	7.84609	1.82025	9.64486	7.19472	10.6777	1.87673	8.8777	1.86913	0
1.64036	1.43312	8.09713	0.911618	10.8238	0.144165	9.74602	12.4462	8.51665	1.82025	8.50849	7.87399	1.89635	1.87673	1.41826	1.86913	0
8.42095	7.96819	7.42327	0.911618	8.20194	0.144165	9.463	13.9523	8.81989	9.28787	9.23547	6.95041	9.96245	1.87673	7.39555	1.86913	0
1.64036	7.66195	8.31528	0.911618	11.0161	6.65197	9.99773	13.7285	7.27757	8.42666	9.5574	8.85051	10.5546	1.87673	8.44064	7.28795	0
1.64036	7.54166	0.722813	7.95603	10.1364	0.144165	9.40708	12.2595	7.33969	7.86862	1.6505	7.16724	9.61061	1.87673	7.06213	1.86913	0
1.64036	8.50994	0.722813	0.911618	10.3431	6.02682	8.44646	13.4711	1.09879	8.73294	8.75904	6.95865	9.54741	1.87673	1.41826	7.62403	0
1.64036	7.35489	9.03403	0.911618	11.1003	0.144165	8.17897	13.4635	7.61507	1.82025	7.50849	8.4268	9.98382	1.87673	1.41826	1.86913	0
1.64036	8.80472	0.722813	7.30395	9.73246	0.144165	9.48478	12.9418	8.52435	8.56993	10.6867	5.72366	8.30575	1.87673	8.20628	7.67649	0
9.62905	9.3177	9.34068	8.32949	8.73135	0.144165	9.2633	12.822	8.42432	9.65984	9.30872	7.06671	11.2994	1.87673	9.9367	7.75158	0
1.64036	1.43312	0.722813	7.92287	11.1991	7.19745	7.53261	17.3713	9.95323	8.35592	11.045	8.49188	9.72291	1.87673	1.41826	1.86913	0
1.64036	1.43312	0.722813	0.911618	10.3063	0.144165	8.77282	13.4832	1.09879	8.72111	8.86968	0.466787	9.94621	1.87673	9.33888	8.94596	0
1.64036	1.43312	8.38104	0.911618	11.3535	0.144165	1.42408	17.459	7.90906	8.77412	10.4054	8.41517	9.80925	1.87673	8.43494	8.77603	0
1.64036	7.04641	0.722813	0.911618	10.1321	0.144165	8.46848	14.2731	1.09879	1.82025	10.9904	8.1881	8.3393	1.87673	7.72574	9.75789	0
1.64036	1.43312	0.722813	8.94506	8.34348	0.144165	9.23787	14.2575	7.58785	1.82025	1.6505	7.32842	10.1252	1.87673	8.55782	10.4765	0
1.64036	8.36831	0.722813	0.911618	9.50352	0.144165	9.8753	13.8251	8.8	8.61467	1.6505	7.54031	6.41991	1.87673	1.41826	10.1453	0
1.64036	1.43312	7.14821	0.911618	10.1705	6.29392	7.85035	13.317	9.57771	8.88046	1.6505	7.68317	9.24508	1.87673	9.54239	8.31208	0
1.64036	7.88883	7.79964	0.911618	10.8494	7.28373	7.0388	14.1346	9.11945	8.63288	10.2242	7.66648	9.58286	1.87673	8.67186	1.86913	0
1.64036	1.43312	7.18225	0.911618	1.71008	0.144165	9.23787	13.0987	8.29756	8.73789	10.4739	8.35554	8.28867	1.87673	8.38067	1.86913	0
1.64036	7.21448	8.19855	7.52634	1.71008	0.144165	1.42408	12.8004	8.42488	1.82025	9.9173	8.02904	10.1107	1.87673	7.34901	1.86913	0
1.64036	8.30953	9.12492	9.15956	10.2057	6.93859	9.0823	13.9809	8.28106	9.04226	10.2799	7.47803	10.0613	1.87673	9.44677	8.81008	0
1.64036	1.43312	8.44118	8.693	10.3321	0.144165	1.42408	13.5406	8.95054	9.75841	9.88891	7.53633	10.0763	1.87673	1.41826	1.86913	0
8.7372	1.43312	8.27537	0.911618	8.99912	0.144165	8.70949	13.2174	8.71418	9.05721	9.35095	7.12117	10.5402	1.87673	8.73115	9.32315	0
8.77617	10.0515	8.4982	8.99378	10.0444	0.144165	10.4325	14.0095	9.84372	9.78015	10.9724	9.00419	12.0575	8.22523	9.4861	8.81991	0
1.64036	1.43312	8.44238	0.911618	8.71649	0.144165	8.11059	13.5716	8.719	8.50913	10.1583	8.70997	9.80925	8.30942	7.97644	1.86913	0
9.10236	8.93383	0.722813	0.911618	1.71008	9.08669	10.3578	14.5099	10.8676	8.60629	11.1838	8.88353	9.14428	1.87673	8.91812	9.33139	0
1.64036	7.73691	7.14909	0.911618	9.86138	6.83068	8.56364	13.3799	9.2751	10.0492	11.2762	7.92753	9.46725	1.87673	8.17541	1.86913	0
1.64036	9.04412	8.63306	6.93401	10.0614	6.23164	9.16555	13.7385	1.09879	8.83224	8.84034	7.15703	9.79814	1.87673	8.97192	1.86913	0
1.64036	8.50994	0.722813	8.30395	10.0712	0.144165	8.66249	12.6739	8.05673	8.85643	9.93128	7.22169	9.49627	1.87673	1.41826	1.86913	0
1.64036	1.43312	6.89275	8.24255	10.2545	0.144165	1.42408	14.0076	8.78529	8.6894	9.77464	8.11426	1.89635	1.87673	7.81059	1.86913	0
9.25338	1.17865	1.5777	7.8816	1.21784	1.02008	6.61419	13.9395	0.624186	0.993437	8.13426	1.21744	9.96502	2.02656	1.61338	1.66612	1
9.30895	1.17865	1.5777	9.87644	8.38778	6.75389	0.591816	14.3852	0.624186	0.993437	7.56982	1.21744	9.07064	9.24524	1.61338	6.83605	1
8.79121	1.17865	1.5777	8.53367	9.11959	1.02008	6.61419	14.2931	7.67548	6.92418	7.68718	7.91299	8.82447	8.76132	7.95915	1.66612	1
9.19266	6.09352	6.6221	8.57249	1.21784	1.02008	7.60305	14.0041	7.69479	5.90034	6.17903	6.80241	9.59592	8.26797	1.61338	1.66612	1
9.80983	1.17865	1.5777	9.48024	7.57626	1.02008	8.00968	13.1477	8.67043	6.23863	8.76933	9.28891	1.07627	9.20771	1.61338	1.66612	1
10.3533	1.17865	1.5777	1.7523	1.21784	1.02008	8.32653	13.8521	7.59664	0.993437	-0.312829	8.49102	1.07627	9.06579	1.61338	1.66612	1
9.28351	1.17865	1.5777	9.22805	8.04371	1.02008	8.98414	14.4895	8.20558	8.53386	6.42864	7.90395	10.2004	9.41028	8.57329	8.59687	1
8.87382	1.17865	1.5777	9.93719	9.53031	1.02008	0.591816	13.7998	6.56475	7.45288	-0.312829	1.21744	9.53571	8.07097	7.74268	9.65481	1
9.55861	1.17865	1.5777	10.6471	8.55395	1.02008	8.47237	13.3372	8.11956	8.87684	7.97719	9.32074	8.60078	9.54776	7.96601	1.66612	1
8.05003	1.17865	1.5777	1.7523	8.96009	1.02008	8.99696	16.4274	7.65166	6.93445	9.11554	1.21744	10.4005	9.71101	1.61338	1.66612	1
8.83884	1.17865	1.5777	1.7523	1.21784	1.02008	0.591816	14.628	0.624186	0.993437	-0.312829	7.5541	1.07627	2.02656	1.61338	1.66612	1
9.91678	7.93355	1.5777	8.79671	9.18363	1.02008	0.591816	14.0552	8.25425	7.54145	9.03591	1.21744	7.94665	8.45418	8.52743	1.66612	1
9.59165	1.17865	1.5777	1.7523	9.03989	1.02008	7.20653	14.8033	7.39523	0.993437	7.50096	7.95892	10.4643	2.02656	7.48538	1.66612	1
1.34498	1.17865	1.5777	7.77469	8.74201	1.02008	8.37318	13.6465	0.624186	0.993437	-0.312829	1.21744	10.5046	8.95039	7.53848	1.66612	1
9.05921	1.17865	1.5777	1.7523	9.57239	1.02008	0.591816	13.5683	0.624186	0.993437	7.24242	1.21744	1.07627	2.02656	1.61338	1.66612	1
7.43245	1.17865	1.5777	1.7523	1.21784	1.02008	8.04303	14.8078	9.13216	7.34605	6.11344	9.05012	1.07627	7.86741	1.61338	1.66612	1
7.73731	8.56841	9.31917	1.7523	1.21784	1.02008	0.591816	14.7621	0.624186	7.57841	7.4151	7.08396	1.07627	8.89271	1.61338	1.66612	1
1.34498	9.0613	1.5777	1.7523	9.3	7.32387	8.09167	14.1078	0.624186	7.39753	8.94221	6.17165	7.64614	2.02656	1.61338	8.15798	0
1.34498	1.17865	9.06675	1.7523	8.56484	1.02008	8.412	14.219	0.624186	0.993437	8.33103	7.07543	9.60376	2.02656	1.61338	8.83605	0
6.66692	1.17865	1.5777	1.7523	10.4634	1.02008	9.01808	14.2783	7.58026	8.50048	8.47181	1.21744	9.22108	2.02656	8.25116	8.85232	0
1.34498	7.66137	1.5777	1.7523	10.0476	1.02008	7.72317	13.7372	8.63392	0.993437	7.68718	8.90246	9.47289	8.20407	8.62057	1.66612	0
1.34498	8.86071	7.57488	1.7523	1.21784	1.02008	6.93167	16.4678	7.53592	0.993437	6.00911	1.21744	1.07627	2.02656	1.61338	1.66612	0
1.34498	1.17865	1.5777	8.96177	9.68213	1.02008	9.02645	13.7675	0.624186	7.17305	8.842	8.28355	1.07627	2.02656	8.25087	8.80568	0
1.34498	7.50059	7.78373	1.7523	9.10049	1.02008	8.48664	14.8415	7.06534	7.83894	6.88685	8.98564	8.25619	2.02656	1.61338	8.53649	0
1.34498	1.17865	1.5777	1.7523	7.86917	1.02008	9.08768	14.019	7.90167	7.30109	6.58199	8.88988	6.40271	2.02656	8.02278	8.63076	0
1.34498	8.31526	1.5777	8.21175	8.49397	1.02008	8.48056	14.6096	8.21325	7.06705	-0.312829	8.37732	9.5601	2.02656	6.57282	1.66612	0
1.34498	8.17584	1.5777	8.90207	10.5084	1.02008	9.76924	13.8065	7.71088	7.69001	7.74246	9.42178	10.3869	2.02656	7.49603	1.66612	0
1.34498	1.17865	9.43141	9.5661	8.65993	1.02008	7.60305	13.7365	8.24467	8.37715	8.13426	9.12431	9.3709	2.02656	8.80004	1.66612	0
1.34498	9.27007	1.5777	1.7523	1.21784	1.02008	9.16168	14.5049	8.5669	7.64309	7.59407	1.21744	7.09865	2.02656	1.61338	8.36657	0
8.70254	8.67577	8.6221	8.69483	10.6587	1.02008	0.591816	14.3691	7.84259	6.86271	8.43201	9.67278	8.4072	8.33035	8.43357	7.82892	0
1.34498	1.17865	9.4106	1.7523	8.74933	1.02008	8.51663	13.4277	0.624186	8.62181	6.81646	1.21744	7.59984	2.02656	1.61338	1.66612	0
1.34498	1.17865	1.5777	1.7523	9.0196	1.02008	6.85861	14.3364	7.94635	7.63333	7.57592	1.21744	9.23615	2.02656	8.71142	1.66612	0
1.34498	8.37783	1.5777	7.92224	1.21784	1.02008	9.65252	14.2193	0.624186	7.72941	7.76933	8.7355	9.14774	2.02656	9.19082	1.66612	0
1.34498	8.01858	1.5777	1.7523	9.89027	1.02008	8.21387	13.5679	8.47624	0.993437	8.12597	8.4269	11.0917	2.02656	8.58326	1.66612	0
1.34498	1.17865	1.5777	1.7523	8.41752	1.02008	5.67929	14.4111	0.624186	7.90034	5.95397	7.52802	1.07627	2.02656	9.12118	8.49902	0
1.34498	7.48244	1.5777	1.7523	8.80116	1.02008	7.85861	14.5073	8.05568	8.43291	8.59106	7.59249	7.9428	2.02656	9.00332	1.66612	0
Supp. Data8.Tab10 U2OS cell representation by DEP expression profile from TOP1 view. The last column is the labels of the cells.
X0	X1	X2	X3	X4	X5	X6	X7	X8	X9	X10	X11	X12	X13	label
1.72059	1.90806	8.81294	2.13499	8.71828	2.05953	9.97834	2.8301	1.12057	7.83271	1.696	0.435615	1.9571	1.92989	1
1.72059	1.90806	9.44583	2.13499	9.57212	2.05953	1.81846	2.8301	8.62042	1.83269	1.696	0.435615	7.93439	1.92989	1
1.72059	8.39992	9.34495	10.1739	7.99131	2.05953	8.43318	2.8301	1.12057	1.83269	1.696	6.64508	9.61533	1.92989	1
1.72059	9.19347	8.51037	10.0598	9.18317	2.05953	7.1404	2.8301	1.12057	1.83269	1.696	0.435615	8.79	1.92989	1
1.72059	1.90806	8.93887	10.9742	9.50401	2.05953	8.927	2.8301	1.12057	1.83269	1.696	0.435615	9.34944	1.92989	1
1.72059	9.20269	9.96324	2.13499	1.13331	2.05953	1.81846	2.8301	1.12057	1.83269	1.696	0.435615	1.9571	1.92989	1
1.72059	1.90806	10.8726	7.96788	9.90811	8.71776	10.4369	2.8301	1.12057	7.32456	11.3144	0.435615	1.9571	1.92989	1
1.72059	1.90806	8.48613	2.13499	8.46424	2.05953	1.81846	2.8301	1.12057	1.83269	1.696	0.435615	1.9571	1.92989	1
1.72059	10.2787	10.1638	8.28474	1.13331	9.83433	8.53272	2.8301	1.12057	1.83269	8.7513	0.435615	8.88785	1.92989	1
1.72059	1.90806	8.44269	2.13499	9.21548	2.05953	1.81846	2.8301	1.12057	1.83269	8.6502	0.435615	9.76447	1.92989	1
1.72059	10.4511	9.04643	9.39238	8.99131	2.05953	1.81846	2.8301	1.12057	1.83269	10.3542	0.435615	8.34943	1.92989	1
1.72059	10.2568	10.3534	10.135	9.40478	8.34494	7.24474	11.152	9.41978	1.83269	7.57865	0.435615	10.0015	1.92989	1
1.72059	1.90806	9.65333	10.6268	7.17772	8.8669	1.81846	2.8301	1.12057	1.83269	1.696	0.435615	1.9571	1.92989	1
1.72059	8.22999	9.94778	2.13499	10.1077	2.05953	1.81846	2.8301	8.28045	1.83269	9.36135	0.435615	8.61533	1.92989	1
1.72059	1.90806	9.00863	2.13499	10.0904	9.01374	10.2656	2.8301	1.12057	1.83269	1.696	0.435615	9.20504	1.92989	1
1.72059	1.90806	9.39465	2.13499	7.90151	2.05953	1.81846	2.8301	1.12057	1.83269	1.696	6.73941	1.9571	1.92989	1
1.72059	11.4059	9.94333	2.13499	10.1886	2.05953	9.56666	2.8301	8.24986	1.83269	9.36844	0.435615	9.13703	1.92989	1
1.72059	10.0166	9.67762	2.13499	1.13331	8.16807	10.1177	2.8301	1.12057	1.83269	1.696	0.435615	9.71867	1.92989	1
1.72059	10.1795	9.02975	10.5985	1.13331	8.20929	9.36536	10.8908	9.00322	9.06153	1.696	0.435615	8.64362	1.92989	1
1.72059	1.90806	8.83711	2.13499	9.55118	2.05953	9.62582	8.68809	1.12057	1.83269	10.0403	0.435615	1.9571	1.92989	1
1.72059	7.68942	9.88194	2.13499	10.2314	2.05953	8.08526	2.8301	7.62837	1.83269	8.7513	0.435615	10.3191	1.92989	1
1.72059	11.0244	9.80561	2.13499	9.85442	9.54335	9.2942	2.8301	1.12057	6.73959	1.696	0.435615	10.2425	1.92989	1
1.72059	10.2479	10.1093	2.13499	1.13331	10.4604	1.81846	2.8301	7.56352	9.04215	9.77282	0.435615	9.44897	1.92989	1
1.72059	1.90806	9.68297	2.13499	8.6647	2.05953	1.81846	2.8301	1.12057	1.83269	1.696	0.435615	8.33216	1.92989	1
1.72059	10.2831	10.5993	8.28474	8.75538	2.05953	7.17602	2.8301	1.12057	1.83269	8.12228	9.09383	9.44897	1.92989	1
1.72059	10.709	9.46147	9.42962	8.90811	2.05953	1.81846	2.8301	9.50859	1.83269	1.696	0.435615	10.4001	1.92989	1
1.72059	9.80893	6.83231	9.12367	9.26261	8.05954	6.40343	2.8301	1.12057	8.22502	1.696	0.435615	9.11699	1.92989	1
1.72059	9.49303	9.91182	10.8492	9.12201	2.05953	10.4731	2.8301	1.12057	1.83269	7.21957	6.13606	1.9571	1.92989	1
1.72059	1.90806	7.82265	2.13499	9.81982	2.05953	9.67645	2.8301	8.37796	1.83269	1.696	7.967	8.88785	1.92989	1
1.72059	10.3797	10.3634	11.3223	9.19402	2.05953	9.03764	2.8301	7.56352	1.83269	9.5289	0.435615	7.31467	1.92989	1
1.72059	11.0035	10.3314	2.13499	10.9081	9.92372	1.81846	2.8301	1.12057	8.70307	10.1879	0.435615	9.69183	1.92989	1
1.72059	10.508	10.0547	2.13499	9.18861	10.0137	9.18479	9.97986	8.74263	8.58759	1.696	0.435615	10.2517	1.92989	1
1.72059	9.40791	9.05057	11.1208	9.55539	2.05953	9.22786	2.8301	1.12057	1.83269	7.7621	0.435615	7.60097	1.92989	1
1.72059	10.23	9.5779	2.13499	9.49964	2.05953	1.81846	2.8301	1.12057	1.83269	9.27344	0.435615	7.73847	1.92989	1
1.72059	1.90806	9.8935	2.13499	7.62518	2.05953	1.81846	2.8301	1.12057	1.83269	8.05356	0.435615	1.9571	1.92989	1
1.72059	8.89675	9.27944	2.13499	9.8982	2.05953	1.81846	2.8301	7.83481	1.83269	10.1054	0.435615	9.31466	1.92989	1
1.72059	1.90806	9.48	2.13499	9.96305	2.05953	1.81846	2.8301	8.85528	1.83269	1.696	0.435615	1.9571	1.92989	1
1.72059	8.6223	10.5194	8.7932	10.016	9.8211	9.30229	2.8301	1.12057	9.3484	9.63852	0.435615	7.97949	1.92989	1
1.72059	1.90806	9.96762	10.6026	1.13331	2.05953	1.81846	2.8301	7.27032	1.83269	1.696	0.435615	8.8151	1.92989	1
1.72059	1.90806	11.4692	11.0892	1.13331	9.45186	9.21079	10.5917	8.51289	8.60089	1.696	0.435615	1.9571	1.92989	0
1.72059	1.90806	11.6876	11.5634	8.76994	9.81442	10.5396	2.8301	9.06894	9.28391	9.96279	9.74397	1.9571	1.92989	0
1.72059	1.90806	10.2347	2.13499	1.13331	9.18882	10.1935	2.8301	1.12057	1.83269	1.696	0.435615	1.9571	8.32222	0
1.72059	1.90806	9.91864	9.74232	8.01597	11.0791	10.2573	2.8301	9.66747	1.83269	1.696	8.24941	1.9571	1.92989	0
1.72059	1.90806	10.2935	10.8999	1.13331	9.5987	8.72536	10.322	1.12057	7.92017	1.696	0.435615	1.9571	1.92989	0
1.72059	10.1749	10.4253	12.1094	8.42794	2.05953	11.3263	2.8301	10.9863	8.09949	10.2659	10.9816	1.9571	1.92989	0
1.72059	1.90806	9.09534	11.3371	1.13331	6.70339	1.81846	9.7843	8.7572	1.83269	9.69036	0.435615	1.9571	1.92989	0
1.72059	1.90806	10.4815	11.2487	1.13331	8.10394	10.1404	2.8301	8.53843	1.83269	8.55398	7.6353	1.9571	8.64415	0
1.72059	9.16545	9.18469	8.62685	1.13331	8.10393	9.85739	2.8301	8.84167	1.83269	9.28097	6.70241	1.9571	1.92989	0
7.69787	1.90806	10.7133	11.4411	7.19941	10.1148	10.3921	2.8301	7.12057	1.83269	9.6029	0.435615	1.9571	7.73725	0
1.72059	1.90806	10.0711	10.5613	8.32315	2.05953	9.80147	2.8301	7.90193	8.02253	1.696	0.435615	1.9571	9.24278	0
1.72059	1.90806	9.70939	10.768	9.02814	2.05953	8.84084	2.8301	1.12057	8.08063	8.80454	0.435615	1.9571	1.92989	0
1.72059	1.90806	10.1133	11.5252	1.13331	2.05953	8.57335	2.8301	7.09785	1.83269	7.55399	0.435615	1.9571	1.92989	0
1.72059	1.90806	9.75324	10.1574	1.13331	10.5831	9.87916	2.8301	7.96606	9.42516	10.7322	5.52309	1.9571	9.36453	0
1.72059	1.90806	10.6896	9.01764	9.08752	10.6669	9.65768	2.8301	9.70554	9.12733	9.35422	0.435615	1.9571	1.92989	0
1.72059	1.90806	9.90955	11.0687	1.13331	10.5025	7.927	7.47396	9.82101	8.90952	11.0905	8.80631	1.9571	1.92989	0
9.67479	1.90806	10.2473	10.7312	9.64112	9.27871	9.1672	2.8301	1.12057	10.2548	8.91518	0.435615	1.9571	9.80027	0
8.97798	1.90806	10.1349	11.1434	1.13331	2.05953	1.81846	2.8301	8.42436	9.02252	10.4509	0.435615	1.9571	1.92989	0
7.47548	1.90806	10.3005	10.5571	8.26261	9.96041	8.86287	2.8301	1.12057	1.83269	11.0359	7.60555	1.9571	7.51486	0
1.72059	1.90806	10.1133	9.40178	1.13331	8.51897	9.63226	2.8301	8.40598	1.83269	1.696	0.435615	1.9571	1.92989	0
1.72059	1.90806	9.92992	11.4181	1.13331	10.1202	10.2697	9.13389	8.27032	1.83269	1.696	6.38982	1.9571	8.73726	0
1.72059	1.90806	11.1378	11.6046	5.45525	11.3003	8.24474	10.5305	9.793	8.93073	1.696	8.25581	1.9571	1.92989	0
1.72059	1.90806	10.5779	11.6487	8.30325	11.0079	7.43318	2.8301	9.87212	9.17255	10.2697	0.435615	1.9571	7.81254	0
1.72059	1.90806	9.80806	2.13499	1.13331	10.4942	9.63225	2.8301	8.74993	7.64006	10.5194	8.32437	1.9571	1.92989	0
8.99672	1.90806	8.48	2.13499	7.86125	2.05953	1.81846	2.8301	9.4152	1.83269	9.96279	0.435615	1.9571	1.92989	0
8.16354	1.90806	10.5577	10.7644	8.90151	10.4389	9.47668	10.2224	9.81406	10.5538	10.3254	0.435615	1.9571	9.20603	0
1.72059	1.90806	9.81294	10.757	1.13331	10.7249	1.81846	2.8301	8.97232	10.6938	9.93441	6.97478	1.9571	1.92989	0
7.84989	9.03735	10.2274	8.67415	10.5321	10.4389	9.10387	2.8301	9.32024	8.77522	9.39645	7.72103	1.9571	7.48449	0
9.07815	10.2255	11.8796	12.7162	10.0068	11.5271	10.8269	11.1921	10.2317	10.9095	11.0179	8.91136	8.27904	10.1731	0
1.72059	1.90806	10.5044	8.70485	1.13331	2.05953	8.50498	10.2051	8.42436	9.05187	10.2038	0.435615	8.31467	1.92989	0
6.30556	9.53742	10.3005	2.13499	1.13331	10.4816	10.7522	2.8301	11.4301	9.41767	11.2293	10.3274	1.9571	1.92989	0
1.72059	1.90806	10.6424	11.555	7.49088	10.5149	8.95802	12.0322	10.303	10.2839	11.3217	6.45799	1.9571	6.73726	0
1.72059	1.90806	10.7198	11.1794	1.13331	2.05953	9.55994	10.6115	1.12057	8.58759	8.88584	8.54415	1.9571	1.92989	0
1.72059	1.90806	11.1043	7.86291	1.13331	10.8572	9.05688	8.91757	8.64414	9.79848	9.97678	0.435615	1.9571	1.92989	0
1.72059	1.90806	9.98719	10.8145	1.13331	10.6852	1.81846	2.8301	8.80707	9.23359	9.82013	8.39563	1.9571	1.92989	0
1.94053	10.6765	10.2323	1.38277	2.38547	7.61905	6.95707	1.93595	0.562385	1.44854	8.1603	0.927458	2.38557	1.99902	1
1.94053	10.5797	8.99969	8.72263	11.8284	1.55295	0.934694	1.93595	0.562385	1.44854	7.59586	0.927458	10.5505	1.99902	1
1.94053	9.65819	10.1362	9.6164	10.7649	9.72289	6.95707	1.93595	7.51659	7.37929	7.71322	5.6279	9.38559	1.99902	1
1.94053	10.1262	9.89219	1.38277	2.38547	1.55295	7.94593	1.93595	8.40788	1.44854	6.20507	0.927458	8.11351	1.99902	1
1.94053	10.8316	9.20312	8.42717	11.3513	1.55295	8.35255	1.93595	8.89331	7.90799	8.79537	0.927458	9.20577	1.99902	1
1.94053	10.8152	9.0072	1.38277	9.96291	8.94528	8.66941	1.93595	6.93743	1.44854	-0.286788	7.98275	9.35137	1.99902	1
1.94053	11.0759	10.3118	8.40515	10.3043	8.36032	9.32702	1.93595	8.15485	8.69648	6.45468	0.927458	9.7693	1.99902	1
1.94053	8.95248	10.0203	10.8278	2.38547	8.70271	0.934694	8.60838	6.08595	1.44854	-0.286788	0.927458	2.38557	1.99902	1
1.94053	10.0278	10.7097	9.31351	11.818	9.55297	10.2316	1.93595	8.10929	7.92429	8.00324	0.927458	11.0186	8.18886	1
1.94053	7.46704	9.53222	8.81741	9.40784	1.55295	9.33984	1.93595	9.26975	8.26873	9.14158	0.927458	10.1471	1.99902	1
1.94053	8.97801	8.98454	1.38277	2.38547	1.55295	0.934694	1.93595	0.562385	1.44854	-0.286788	7.45103	2.38557	1.99902	1
1.94053	10.7124	9.38427	9.34856	8.31621	9.66671	0.934694	9.28469	8.95471	7.90798	9.06195	0.927458	9.2804	1.99902	1
1.94053	9.46102	9.69228	8.59223	2.38547	1.55295	7.54941	1.93595	7.95471	1.44854	7.527	0.927458	2.38557	9.14878	1
1.94053	1.56015	10.2718	9.00483	11.0148	9.85217	8.71606	1.93595	0.562385	1.44854	-0.286788	0.927458	8.67099	1.99902	1
1.94053	10.9546	8.50595	8.96774	2.38547	1.55295	0.934694	1.93595	0.562385	1.44854	8.36427	0.927458	2.38557	1.99902	1
1.94053	1.56015	10.1258	1.38277	10.2247	9.68225	8.38591	1.93595	9.53394	7.17647	6.13948	8.73482	7.87744	8.20849	1
1.94053	1.56015	10.0184	1.38277	2.38547	9.08434	0.934694	1.93595	0.562385	1.44854	7.44114	0.927458	10.3629	1.99902	1
1.94053	1.56015	10.5784	9.46493	2.38547	1.55295	8.43455	1.93595	0.562385	1.44854	8.96825	0.927458	2.38557	1.99902	0
9.54045	1.56015	9.88201	9.5069	9.05791	1.55295	8.75488	9.25789	0.562385	1.44854	8.35708	0.927458	2.38557	1.99902	0
1.94053	6.88208	10.2498	10.6283	5.70741	9.84298	9.36096	8.39539	7.68134	9.11388	8.49785	0.927458	2.38557	1.99902	0
1.94053	1.56015	10.3027	10.2125	9.40784	1.55295	8.4425	9.16478	8.57362	1.44854	7.71322	8.50489	8.31632	1.99902	0
8.97396	1.56015	10.0165	1.38277	10.2924	9.40471	7.27455	1.93595	7.61768	1.44854	6.03515	0.927458	2.38557	1.99902	0
1.94053	1.56015	9.27957	10.097	2.38547	8.67191	9.36933	9.89015	0.562385	7.5983	8.86804	0.927458	2.38557	9.37407	0
1.94053	1.56015	9.61324	9.26542	9.90117	8.74279	8.82952	9.52092	6.36975	1.44854	6.91289	0.927458	2.38557	1.99902	0
1.94053	1.56015	9.93221	10.1005	9.92463	8.89281	9.43056	7.66388	8.03	8.20344	6.60803	0.927458	2.38557	7.78039	0
1.94053	1.56015	9.27957	8.6589	9.71639	1.55295	8.82344	10.5762	7.9461	1.44854	-0.286788	0.927458	2.38557	1.99902	0
1.94053	1.56015	10.5178	10.2531	2.38547	10.4748	10.1121	1.93595	7.78156	7.49295	7.7685	9.82833	2.38557	1.99902	0
7.96291	1.56015	10.4926	9.19013	9.45157	9.87038	7.94593	9.78145	8.67614	8.83225	8.1603	9.59989	2.38557	1.99902	0
1.94053	1.56015	10.5897	1.38277	2.38547	9.56419	9.50456	1.93595	8.68651	8.04847	7.62011	0.927458	2.38557	1.99902	0
1.94053	1.56015	10.2226	10.8236	2.38547	9.64572	0.934694	1.93595	8.60678	7.51465	8.45806	0.927458	2.38557	1.99902	0
1.94053	1.56015	8.8697	9.09702	2.38547	7.72289	8.85951	1.93595	0.562385	8.52537	6.84251	0.927458	2.38557	1.99902	0
1.94053	1.56015	9.18998	10.2314	9.6801	1.55295	7.20149	1.93595	8.16231	8.31892	7.60196	0.927458	2.38557	8.49089	0
1.94053	1.56015	10.9576	1.38277	2.38547	10.3012	9.9954	1.93595	0.562385	9.39691	7.79537	9.22209	2.38557	1.99902	0
1.94053	1.56015	10.1207	10.0552	2.38547	1.55295	8.55675	9.48285	8.54538	1.44854	8.15201	0.927458	2.38557	1.99902	0
1.94053	1.56015	10.1362	8.58245	2.38547	7.36031	6.02217	1.93595	0.562385	8.67737	5.98001	7.41932	2.38557	1.99902	0
1.94053	1.56015	10.2242	10.8278	2.38547	1.55295	8.20149	10.4438	8.41414	8.29404	8.6171	0.927458	2.38557	1.99902	0
Supp. Data8.Tab11 U2OS cell representation by DEP expression profile from MCP view concatnation. The last column is the labels of the cells.
X0	X1	X2	X3	X4	X5	X6	X7	X8	X9	X10	X11	X12	X13	X14	X15	X16	X17	X18	X19	X20	X21	X22	X23	X24	X25	X26	X27	X28	X29	X30	X31	X32	X33	X34	X35	X36	X37	X38	X39	X40	X41	X42	X43	X44	X45	X46	X47	X48	X49
2.03197	1.54995	1.40543	9.41628	1.04424	0.514354	9.62117	7.72888	9.77325	9.62895	0.285237	11.1116	0.622688	10.9488	9.42632	0.8536	9.53554	-0.268932	0.845824	9.3006	1.50851	9.25948	2.32545	0.389409	1.72191	1.97632	0.996815	1.59634	1.23654	0.876918	1.52246	1.84171	1.77344	1.42939	1.27163	7.4689	1.00326	0.434949	6.3199	6.13443	6.64928	7.18399	7.95869	0.377194	8.59165	7.62219	-0.0847609	1.00062	7.69482	1.47277
2.03197	1.54995	1.40543	1.43958	1.04424	8.45731	7.92843	7.03719	10.172	10.567	0.285237	1.07036	0.622688	1.96596	9.78966	8.58978	1.60071	9.33782	0.845824	0.719137	9.94743	8.59219	2.32545	9.38266	1.72191	1.97632	0.996815	1.59634	1.23654	0.876918	1.52246	1.84171	1.77344	1.42939	1.27163	1.28796	1.00326	7.35842	6.40756	5.78088	7.24568	7.84541	0.981778	0.377194	1.51266	1.55608	6.8943	1.00062	0.711928	7.57517
2.03197	1.54995	1.40543	10.6546	1.04424	0.514354	8.31001	-0.358316	10.6611	9.57788	0.285237	10.1879	0.622688	1.96596	9.05379	0.8536	1.60071	9.19118	7.94294	9.31147	10.2111	9.79257	10.2802	9.85658	1.72191	1.97632	0.996815	1.59634	1.23654	10.1221	1.52246	1.84171	1.77344	1.42939	1.27163	8.02848	1.00326	0.434949	5.36157	-0.245956	7.16757	7.04977	7.27732	0.377194	1.51266	1.55608	6.25518	1.00062	7.52404	8.30352
2.03197	1.54995	1.40543	9.71631	1.04424	0.514354	8.55	-0.358316	9.29433	9.87125	0.285237	10.599	0.622688	1.96596	9.15321	0.8536	1.60071	7.40333	0.845824	9.70975	8.80626	7.80954	10.8618	8.87825	9.06941	1.97632	7.17131	6.91715	1.23654	9.0527	8.13706	1.84171	1.77344	1.42939	1.27163	6.95286	1.00326	0.434949	6.6885	-0.245956	6.47624	7.49628	7.62705	0.377194	1.51266	1.55608	5.89561	1.00062	7.22006	8.10945
2.03197	1.54995	1.40543	1.43958	1.04424	0.514354	8.96466	-0.358316	0.204577	10.083	0.285237	10.0026	10.0993	1.96596	-2.12141	0.8536	1.60071	-0.268932	0.845824	10.5863	9.97901	8.42082	2.32545	11.2525	1.72191	1.97632	0.996815	1.59634	1.23654	8.98544	1.52246	1.84171	1.77344	8.19149	1.27163	1.28796	1.00326	0.434949	7.30863	-0.245956	0.350441	8.22016	7.51153	7.29822	1.51266	1.55608	-0.0847609	1.00062	8.35302	7.96719
2.03197	1.54995	1.40543	10.1359	1.04424	0.514354	0.319806	6.05818	9.44137	0.773531	0.285237	1.07036	8.86382	1.96596	-2.12141	0.8536	9.3644	9.06448	0.845824	0.719137	1.50851	8.16026	2.32545	10.2785	1.72191	1.97632	0.996815	1.59634	1.23654	0.876918	1.52246	1.84171	1.77344	1.42939	1.27163	7.67275	1.00326	0.434949	0.476496	6.10473	6.74234	0.813164	0.981778	6.36788	1.51266	8.62067	6.67599	1.00062	0.711928	1.47277
2.03197	10.2533	1.40543	1.43958	1.04424	0.514354	8.44546	-0.358316	0.204577	10.1963	0.285237	10.5142	10.3843	1.96596	9.14896	0.8536	10.6167	8.21035	0.845824	8.76312	1.50851	8.20919	2.32545	10.1116	1.72191	1.97632	0.996815	1.59634	9.11316	0.876918	7.56114	10.8074	1.77344	1.42939	7.84707	1.28796	1.00326	0.434949	7.07382	-0.245956	0.350441	8.32489	8.31647	7.87869	1.51266	8.64004	6.38663	1.00062	7.13268	1.47277
2.03197	1.54995	1.40543	1.43958	1.04424	0.514354	9.16888	-0.358316	9.00001	9.06563	0.285237	1.07036	8.07199	1.96596	-2.12141	0.8536	1.60071	-0.268932	0.845824	0.719137	1.50851	6.94232	2.32545	8.86584	1.72191	1.97632	0.996815	1.59634	1.23654	0.876918	1.52246	1.84171	1.77344	1.42939	1.27163	1.28796	1.00326	0.434949	6.28553	-0.245956	6.17721	7.39984	0.981778	5.76114	1.51266	1.55608	-0.0847609	1.00062	0.711928	1.47277
2.03197	1.54995	1.40543	10.3729	1.04424	0.514354	9.22255	-0.358316	10.6395	0.773531	0.285237	9.94677	8.99222	1.96596	9.42679	0.8536	1.60071	9.14902	0.845824	0.719137	8.8032	7.43994	2.32545	10.3588	1.72191	1.97632	0.996815	1.59634	1.23654	0.876918	1.52246	10.6338	8.80858	1.42939	1.27163	7.7253	1.00326	0.434949	6.94525	-0.245956	7.63495	0.813164	7.55713	6.61748	1.51266	1.55608	7.22118	1.00062	0.711928	8.39267
2.03197	1.54995	1.40543	1.43958	1.04424	9.80175	10.4925	-0.358316	10.4536	9.70598	0.285237	1.07036	10.5341	1.96596	9.44918	0.8536	1.60071	-0.268932	0.845824	0.719137	10.4618	7.8241	2.32545	8.89775	1.72191	1.97632	0.996815	1.59634	1.23654	0.876918	1.52246	10.2244	1.77344	1.42939	1.27163	1.28796	1.00326	7.71973	7.03832	-0.245956	7.21658	7.2895	0.981778	7.39784	1.51266	1.55608	-0.0847609	1.00062	0.711928	8.70243
2.03197	1.54995	1.40543	10.9598	1.04424	0.514354	10.4477	-0.358316	10.2991	9.74505	8.99643	1.07036	10.9082	10.2974	9.70603	0.8536	1.60071	9.22296	0.845824	0.719137	10.6183	9.62446	9.35251	9.56214	1.72191	1.97632	0.996815	1.59634	1.23654	0.876918	1.52246	1.84171	1.77344	1.42939	8.36325	8.08961	1.00326	0.434949	7.98339	-0.245956	7.42872	7.31025	0.981778	7.34231	6.48498	1.55608	7.01399	1.00062	0.711928	8.47836
2.03197	1.54995	1.40543	11.2973	11.7974	0.514354	9.30301	-0.358316	10.7301	10.1398	8.39763	10.2523	0.622688	1.96596	9.64949	0.8536	1.60071	-0.268932	0.845824	0.719137	10.8444	7.84007	2.32545	0.389409	1.72191	1.97632	0.996815	1.59634	1.23654	0.876918	1.52246	1.84171	1.77344	10.3925	1.27163	8.37762	8.47068	0.434949	7.02174	-0.245956	7.36316	7.39338	6.87456	0.377194	1.51266	1.55608	-0.0847609	1.00062	0.711928	8.34008
2.03197	1.54995	1.40543	1.43958	1.04424	0.514354	9.78351	-0.358316	7.63726	9.47953	7.27129	1.07036	0.622688	1.96596	8.37617	0.8536	1.60071	7.9013	0.845824	9.92727	1.50851	0.0446867	2.32545	8.15755	1.72191	1.97632	0.996815	1.59634	8.83432	0.876918	1.52246	1.84171	9.95865	1.42939	1.27163	1.28796	1.00326	0.434949	7.71981	-0.245956	5.63216	6.81444	0.981778	0.377194	1.51266	1.55608	6.06825	1.00062	7.46973	1.47277
10.4451	1.54995	1.40543	11.1847	1.04424	9.47961	7.40682	7.69574	10.5818	10.8853	0.285237	1.07036	9.06003	10.7322	-2.12141	0.8536	1.60071	9.22731	0.845824	0.719137	9.77397	0.0446867	2.32545	0.389409	1.72191	1.97632	0.996815	8.37036	1.23654	0.876918	10.7211	1.84171	1.77344	11.2306	1.27163	8.68811	1.00326	5.32753	5.95795	6.23504	7.75071	8.49646	0.981778	6.71932	7.39676	1.55608	6.91215	1.00062	0.711928	8.24309
2.03197	8.39941	1.40543	11.1395	1.04424	0.514354	8.87541	7.1452	9.46094	10.2537	0.285237	10.8604	10.9593	1.96596	9.49922	0.8536	1.60071	-0.268932	0.845824	9.81975	10.3183	8.40752	2.32545	0.389409	1.72191	1.97632	0.996815	1.59634	1.23654	0.876918	9.14367	1.84171	10.0912	1.42939	7.7548	8.53152	1.00326	0.434949	6.63789	6.67146	6.84287	7.92439	8.06115	7.67033	1.51266	1.55608	-0.0847609	1.00062	7.15697	8.59594
2.03197	1.54995	1.40543	10.9567	5.68157	0.514354	8.90077	7.25841	10.4307	9.208	7.62833	1.07036	9.83631	1.96596	-2.12141	0.8536	1.60071	8.30055	8.71793	8.15726	1.50851	9.77553	10.378	0.389409	1.72191	1.97632	0.996815	1.59634	9.67396	9.26374	8.3426	1.84171	1.77344	1.42939	1.27163	8.13046	5.84845	0.434949	6.34391	5.69789	7.7337	7.3976	0.981778	6.76799	1.51266	1.55608	5.98623	7.12162	5.95141	1.47277
2.03197	1.54995	1.40543	10.268	1.04424	8.93095	8.71121	7.72915	8.7154	10.1724	0.285237	9.57875	7.91446	1.96596	9.65712	0.8536	1.60071	6.88515	0.845824	9.16011	9.89832	8.81116	10.2405	0.389409	1.72191	1.97632	7.12389	1.59634	1.23654	0.876918	1.52246	10.3713	10.3034	1.42939	1.27163	9.31592	1.00326	6.2276	6.6667	6.02247	6.76403	7.8053	7.15337	6.56295	1.51266	1.55608	5.51906	1.00062	7.16355	8.17574
2.03197	1.54995	1.40543	10.9687	1.04424	11.5173	9.42259	6.48768	0.204577	10.5335	0.285237	11.0021	9.58844	10.2484	9.69488	0.8536	1.60071	-0.268932	0.845824	9.54992	10.0134	5.7698	2.32545	6.366	1.72191	1.97632	0.996815	1.59634	9.89687	10.3557	9.36311	1.84171	1.77344	1.42939	1.27163	8.72002	1.00326	8.25797	7.20389	5.4086	0.350441	0.813164	8.45227	6.55753	7.288	1.55608	-0.0847609	1.00062	7.40108	8.73264
2.03197	1.54995	1.40543	11.2864	8.44104	9.46317	7.78177	8.40958	0.204577	0.773531	0.285237	9.931	9.763	1.96596	8.99005	0.8536	9.88202	-0.268932	0.845824	10.1303	9.32569	8.27442	9.91034	9.40335	1.72191	6.88661	0.996815	8.20021	1.23654	9.31497	1.52246	9.1638	1.77344	1.42939	1.27163	8.48956	7.10124	7.6004	6.31405	6.54707	0.350441	0.813164	7.33081	7.6968	1.51266	8.51947	-0.0847609	1.00062	7.79918	7.93974
2.03197	1.54995	1.40543	1.43958	1.04424	0.514354	10.1475	8.01892	8.44203	10.6464	0.285237	10.3715	10.7637	1.96596	-2.12141	0.8536	9.3274	6.60054	0.845824	0.719137	1.50851	8.30604	2.32545	8.99976	1.72191	1.97632	0.996815	1.59634	1.23654	0.876918	1.52246	1.84171	1.77344	1.42939	1.27163	1.28796	1.00326	0.434949	7.35789	6.64448	6.31732	7.89842	7.90938	7.71814	1.51266	7.83778	6.13417	1.00062	0.711928	1.47277
2.03197	1.54995	1.40543	8.71802	1.04424	0.514354	8.27502	7.5698	9.29336	10.6906	0.285237	9.80737	10.5681	1.96596	9.82807	0.8536	9.56801	7.00867	8.24818	9.48661	11.2304	8.34249	10.266	9.77994	1.72191	1.97632	0.996815	1.59634	1.23654	0.876918	9.48088	1.84171	1.77344	10.9265	1.27163	6.13306	1.00326	0.434949	6.62552	6.23028	6.6293	8.13789	7.05022	7.59986	1.51266	9.08119	6.51563	7.77188	6.99983	9.28802
2.03197	1.54995	1.40543	11.2729	10.2433	0.514354	9.72618	5.70546	11.4306	10.7794	8.53119	10.683	9.55595	1.96596	8.88221	0.8536	9.45651	8.86321	9.2165	0.719137	10.5224	8.63063	2.32545	0.389409	1.72191	1.97632	0.996815	1.59634	1.23654	8.26611	1.52246	10.846	1.77344	7.88202	1.27163	8.83738	7.66169	0.434949	7.08038	5.5437	8.72163	8.50701	8.10246	7.00594	1.51266	7.37028	6.37233	7.25146	0.711928	8.85923
2.03197	1.54995	1.40543	10.5856	1.04424	0.514354	9.22733	-0.358316	9.13427	10.0348	8.4469	1.07036	0.622688	11.2052	-2.12141	0.8536	9.49642	8.73592	0.845824	0.719137	10.0888	0.0446867	9.01426	9.02166	1.72191	1.97632	9.28823	1.59634	1.23654	9.35281	10.5466	10.675	1.77344	10.607	1.27163	8.44228	1.00326	0.434949	7.09066	-0.245956	6.76171	0.813164	0.981778	0.377194	7.93764	7.25494	6.91913	1.00062	0.711928	8.21419
2.03197	1.54995	1.40543	1.43958	9.00455	0.514354	0.319806	-0.358316	9.96056	10.6516	0.285237	9.13537	9.55897	9.16842	-2.12141	0.8536	1.60071	6.1305	0.845824	0.719137	9.2261	0.0446867	2.32545	0.389409	1.72191	1.97632	7.12677	11.6126	1.23654	8.93066	9.82847	1.84171	1.77344	10.6742	1.27163	1.28796	6.92026	0.434949	0.476496	-0.245956	7.12195	7.69244	7.6727	6.82811	6.63506	1.55608	5.37404	1.00062	0.711928	7.78365
2.03197	1.54995	1.40543	11.4586	1.04424	0.514354	9.53446	-0.358316	9.97113	9.85842	9.82411	8.61267	0.622688	1.96596	9.40595	0.8536	1.60071	9.22638	0.845824	8.77884	10.0474	0.0446867	2.32545	9.95392	1.72191	1.97632	0.996815	1.59634	1.23654	0.876918	1.52246	1.84171	1.77344	1.42939	1.27163	8.51045	1.00326	0.434949	6.91806	-0.245956	7.36418	7.82991	6.05185	0.377194	1.51266	1.55608	6.3658	1.00062	6.54128	7.59336
2.03197	1.54995	1.40543	11.2366	9.68454	0.514354	9.43298	-0.358316	10.8458	9.5203	0.285237	1.07036	8.99163	1.96596	8.71113	0.8536	1.60071	-0.268932	0.845824	10.8998	11.2839	10.1085	2.32545	0.389409	1.72191	1.97632	0.996815	1.59634	1.23654	9.47463	1.52246	1.84171	9.07303	1.42939	1.27163	8.75918	6.99073	0.434949	6.86054	-0.245956	7.81767	7.92382	0.981778	6.29704	1.51266	1.55608	-0.0847609	1.00062	8.04053	9.1898
2.03197	1.54995	1.40543	11.0074	1.04424	0.514354	8.72538	-0.358316	10.5895	10.1841	8.87242	9.33548	0.622688	1.96596	8.41078	0.8536	9.17551	-0.268932	0.845824	9.84999	10.829	0.0446867	10.7496	0.389409	1.72191	1.97632	0.996815	1.59634	1.23654	0.876918	1.52246	1.84171	1.77344	1.42939	1.27163	8.43367	1.00326	0.434949	5.72769	-0.245956	7.01385	7.65984	6.97342	0.377194	1.51266	7.2174	-0.0847609	1.00062	6.89865	8.70419
2.03197	1.54995	1.40543	10.1483	1.04424	0.514354	0.319806	-0.358316	8.65313	9.58915	0.285237	9.77027	9.61745	8.97922	-2.12141	0.8536	1.60071	7.37835	0.845824	9.08065	1.50851	0.0446867	2.32545	0.389409	1.72191	1.97632	0.996815	1.59634	1.23654	0.876918	1.52246	1.84171	1.77344	1.42939	1.27163	7.96461	1.00326	0.434949	0.476496	-0.245956	6.01983	7.67815	7.96469	6.97723	7.61408	1.55608	5.55857	1.00062	6.75104	1.47277
2.03197	1.54995	1.40543	11.2366	1.04424	10.4058	9.06523	-0.358316	8.66215	10.0967	0.285237	10.5111	10.0682	1.96596	9.32217	0.8536	1.60071	9.18529	0.845824	0.719137	9.41906	0.0446867	2.32545	0.389409	1.72191	1.97632	0.996815	10.6688	1.23654	8.66471	1.52246	1.84171	1.77344	1.42939	1.27163	8.56575	1.00326	7.09548	6.25361	-0.245956	6.20978	7.59137	7.766	6.72941	1.51266	1.55608	7.27016	1.00062	0.711928	8.09237
2.03197	1.54995	1.40543	11.0209	8.98159	9.63656	9.47927	5.58277	9.95426	9.58518	0.285237	9.47702	9.24362	1.96596	-2.12141	0.8536	1.60071	8.7781	8.83491	0.719137	10.8722	9.7646	2.32545	9.52275	1.72191	1.97632	0.996815	1.59634	1.23654	0.876918	10.7525	10.3158	1.77344	1.42939	1.27163	8.52391	7.00469	7.17141	7.00221	5.44145	7.12123	7.77583	7.1385	6.82171	1.51266	1.55608	6.51081	7.36127	0.711928	8.45448
2.03197	1.54995	1.40543	11.6328	1.04424	9.53706	10.3005	-0.358316	8.96401	10.9477	0.285237	11.1041	8.91892	1.96596	-2.12141	0.8536	9.47773	7.61917	0.845824	0.719137	10.5214	9.27652	10.6475	0.389409	1.72191	1.97632	0.996815	10.3851	1.23654	8.495	1.52246	1.84171	9.85993	1.42939	1.27163	9.26976	1.00326	7.00818	8.44227	-0.245956	6.85631	7.94052	8.21069	6.05693	1.51266	7.48915	6.7607	1.00062	0.711928	8.43628
2.03197	9.85741	1.40543	11.5283	9.44545	8.0337	9.40813	-0.358316	9.12633	9.2915	7.19515	9.6269	10.4152	1.96596	9.12454	0.8536	8.39515	9.18953	0.845824	10.0058	10.7105	8.33142	8.4094	0.389409	1.72191	1.97632	0.996815	9.61105	1.23654	8.93482	1.52246	1.84171	1.77344	11.5168	7.92241	9.37494	8.20567	6.49546	7.26656	-0.245956	6.39805	7.72391	7.68883	0.377194	1.51266	8.26968	7.0945	1.00062	7.49711	8.64036
2.03197	10.9714	1.40543	10.9955	1.04424	0.514354	0.319806	-0.358316	10.6302	10.9215	0.285237	10.2045	0.622688	1.96596	9.90407	0.8536	1.60071	8.50753	8.55248	0.719137	10.0053	0.0446867	10.9418	9.46367	1.72191	1.97632	0.996815	1.59634	1.23654	0.876918	1.52246	1.84171	1.77344	1.42939	7.88548	8.1239	1.00326	0.434949	0.476496	-0.245956	7.10216	8.14773	7.21311	0.377194	1.51266	1.55608	5.79445	7.71762	0.711928	7.65703
2.03197	1.54995	1.40543	11.0824	1.04424	0.514354	8.67251	-0.358316	9.57988	10.0729	0.285237	1.07036	8.27668	9.17578	-2.12141	0.8536	8.56733	8.29459	0.845824	0.719137	10.354	9.76121	2.32545	9.69285	1.72191	1.97632	0.996815	1.59634	1.23654	8.37113	9.31914	1.84171	1.77344	1.42939	1.27163	8.29933	1.00326	0.434949	6.84597	-0.245956	7.04776	7.51902	0.981778	5.89914	7.98195	8.60117	6.81095	1.00062	0.711928	8.03839
2.03197	1.54995	1.40543	1.43958	1.04424	0.514354	10.4164	7.97972	0.204577	9.29378	0.285237	1.07036	10.0521	1.96596	-2.12141	0.8536	1.60071	8.65266	8.80005	0.719137	1.50851	0.0446867	2.32545	9.38185	1.72191	1.97632	0.996815	1.59634	1.23654	0.876918	9.84197	1.84171	1.77344	1.42939	1.27163	1.28796	1.00326	0.434949	7.23897	6.81504	0.350441	6.90253	0.981778	0.377194	1.51266	1.55608	6.7008	6.52318	0.711928	1.47277
2.03197	10.0879	1.40543	9.87474	1.04424	0.514354	9.7421	-0.358316	9.45478	10.2974	0.285237	1.07036	0.622688	1.96596	9.44319	0.8536	1.60071	7.98717	0.845824	8.78589	10.4513	8.43513	2.32545	0.389409	1.72191	1.97632	0.996815	1.59634	7.07581	9.45618	1.52246	11.0787	1.77344	10.0529	7.08855	7.70356	1.00326	0.434949	7.10591	-0.245956	7.1368	7.58304	0.981778	0.377194	1.51266	1.55608	6.60916	1.00062	6.00495	8.64731
2.03197	8.7539	1.40543	1.43958	1.04424	0.514354	0.319806	6.95265	0.204577	10.1507	0.285237	1.07036	0.622688	1.96596	-2.12141	0.8536	1.60071	8.09518	0.845824	0.719137	10.4141	0.0446867	2.32545	0.389409	1.72191	1.97632	0.996815	1.59634	1.23654	0.876918	8.51205	1.84171	9.78257	1.42939	6.84188	1.28796	1.00326	0.434949	0.476496	5.58527	0.350441	8.58274	0.981778	0.377194	1.51266	1.55608	5.92668	1.00062	0.711928	8.91017
2.03197	9.59821	7.88298	9.60377	1.04424	0.514354	0.319806	8.07767	0.204577	10.172	0.285237	9.98943	9.38504	8.89637	-2.12141	0.8536	10.2679	8.53785	0.845824	9.81832	8.91973	8.4685	9.56568	9.92171	1.72191	1.97632	0.996815	1.59634	1.23654	0.876918	10.3187	1.84171	1.77344	10.033	7.91198	7.34337	1.00326	0.434949	0.476496	6.74166	0.350441	7.88071	8.07133	7.41302	7.32682	8.66081	6.49335	1.00062	7.87686	7.6709
2.03197	1.54995	1.40543	1.43958	8.5419	0.514354	9.58374	-0.358316	10.392	0.773531	0.285237	1.07036	9.7973	1.96596	9.98011	0.8536	1.60071	-0.268932	0.845824	0.719137	9.8367	7.99401	2.32545	0.389409	1.72191	1.97632	0.996815	1.59634	1.23654	0.876918	1.52246	1.84171	1.77344	1.42939	1.27163	1.28796	7.84657	0.434949	6.7321	-0.245956	7.18718	0.813164	0.981778	6.87982	1.51266	1.55608	-0.0847609	1.00062	0.711928	8.36652
2.03197	1.54995	10.0399	1.43958	1.04424	10.5499	9.30838	7.36744	9.58453	0.773531	9.65593	8.96255	9.97583	11.6548	-2.12141	0.8536	9.40998	-0.268932	9.67864	8.83033	1.50851	0.0446867	9.39073	10.034	1.72191	1.97632	9.08946	9.42174	1.23654	0.876918	1.52246	1.84171	9.78183	8.97763	1.27163	1.28796	1.00326	7.64435	7.38961	6.30578	7.8782	0.813164	6.68329	7.70164	8.47533	8.43824	-0.0847609	1.00062	7.74212	1.47277
2.03197	9.80531	7.33902	1.43958	9.70568	11.4049	0.319806	-0.358316	9.01005	8.3716	9.62448	10.8002	10.3198	10.24	-2.12141	0.8536	10.5669	8.89945	8.48267	10.2765	1.50851	0.0446867	2.32545	10.1063	8.38541	9.35326	8.55667	9.71602	1.23654	0.876918	1.52246	1.84171	9.08398	10.3074	7.82848	1.28796	7.83947	8.50911	0.476496	-0.245956	7.16857	7.12603	8.54001	7.6809	8.19829	8.50972	6.6469	7.36226	7.86914	1.47277
2.03197	1.54995	1.40543	1.43958	1.04424	0.514354	7.93333	-0.358316	10.6389	0.773531	0.285237	10.9725	8.93752	1.96596	9.8103	0.8536	1.60071	8.94063	9.98402	10.0438	1.50851	0.0446867	11.0771	11.1713	1.72191	1.97632	0.996815	9.78816	1.23654	0.876918	1.52246	1.84171	1.77344	1.42939	1.27163	1.28796	1.00326	0.434949	6.29623	-0.245956	7.46999	0.813164	8.3332	5.43111	1.51266	1.55608	7.00475	1.00062	7.70643	1.47277
9.91805	1.54995	1.40543	9.33321	10.2557	10.9478	0.319806	8.20364	9.73261	8.82867	0.285237	11.224	9.97282	11.0907	-2.12141	9.07003	1.60071	8.86181	9.05005	0.719137	1.50851	0.0446867	9.56187	9.46007	1.72191	9.44455	8.22415	1.59634	1.23654	0.876918	1.52246	9.99591	11.6498	10.7995	1.27163	8.40455	7.78015	7.67158	0.476496	6.76866	7.06464	7.02442	8.53045	7.01049	7.24434	1.55608	6.41433	7.36844	0.711928	1.47277
2.03197	10.3337	8.44759	1.43958	9.84968	10.6884	8.46181	-0.358316	0.204577	0.773531	0.285237	10.3502	0.622688	10.9005	10.1587	0.8536	10.9088	9.2352	8.8895	8.84019	1.50851	0.0446867	2.32545	9.73789	1.72191	1.97632	0.996815	1.59634	1.23654	0.876918	1.52246	10.8638	10.8351	11.2596	7.93917	1.28796	7.93393	7.69282	6.18033	-0.245956	7.16982	0.813164	8.25324	0.377194	7.87269	8.73729	6.77554	1.00062	7.60677	1.47277
2.03197	10.9874	1.40543	9.74156	1.04424	0.514354	8.30641	11.3097	9.99264	8.21489	0.285237	10.3695	8.81976	10.0558	8.96598	8.64426	9.04775	9.87322	0.845824	9.07097	1.50851	0.0446867	10.9665	8.26926	1.72191	1.97632	0.996815	1.59634	9.35686	0.876918	1.52246	10.1713	1.77344	1.42939	8.84275	7.73727	1.00326	0.434949	5.98843	9.30461	7.0254	6.82202	7.97643	6.79052	7.71748	7.71116	7.04263	1.00062	7.40128	1.47277
2.03197	9.26515	9.17964	1.43958	1.04424	9.06615	0.319806	-0.358316	10.2187	0.773531	9.04174	1.07036	10.3568	1.96596	8.73922	9.53704	1.60071	8.87538	10.05	0.719137	1.50851	0.0446867	9.67284	8.87274	8.88004	1.97632	8.71921	1.59634	10.4573	0.876918	1.52246	10.7328	1.77344	9.79636	8.02812	1.28796	1.00326	6.85408	0.476496	-0.245956	7.35022	0.813164	0.981778	7.28398	1.51266	1.55608	6.71919	8.37996	0.711928	1.47277
2.03197	1.54995	8.87525	1.43958	1.04424	10.6948	9.30142	7.45526	10.1513	0.773531	9.2528	10.8427	9.99145	11.9366	-2.12141	0.8536	1.60071	9.41351	0.845824	0.719137	1.50851	0.0446867	2.32545	9.53302	1.72191	1.97632	0.996815	8.48072	1.23654	0.876918	1.52246	10.887	1.77344	1.42939	1.27163	1.28796	1.00326	7.5437	6.67052	6.8978	7.17854	0.813164	7.82806	7.44557	8.52502	1.55608	6.6523	1.00062	0.711928	1.47277
2.03197	9.95709	1.40543	9.82063	9.84783	10.0021	0.319806	-0.358316	9.32013	0.773531	0.285237	10.6501	8.73697	10.7377	-2.12141	9.01601	9.81375	8.18468	9.28561	9.0405	1.50851	0.0446867	10.1643	8.92663	1.72191	1.97632	7.33568	1.59634	8.72088	0.876918	1.52246	10.4677	1.77344	1.42939	7.49484	7.44718	7.0739	7.35627	0.476496	-0.245956	7.19257	0.813164	7.99269	6.55032	7.64354	8.42021	6.02264	7.13609	6.38556	1.47277
2.03197	8.21215	7.76653	1.43958	7.70738	9.94304	0.319806	-0.358316	10.1253	7.75115	0.285237	11.3633	9.77199	11.8587	-2.12141	0.8536	8.51149	8.74186	9.14024	9.2419	1.50851	0.0446867	11.3059	0.389409	1.72191	1.97632	10.1766	9.63464	9.01266	0.876918	1.52246	11.9443	10.0842	1.42939	7.42005	1.28796	7.37696	7.70687	0.476496	-0.245956	8.04004	6.76316	8.71034	7.03706	9.19609	8.47662	7.64215	7.87712	7.37118	1.47277
2.03197	1.54995	1.40543	1.43958	10.0265	10.2462	9.519	8.04893	10.2706	9.55276	0.285237	10.7744	10.5995	11.2749	9.69882	0.8536	9.70307	8.89701	0.845824	0.719137	1.50851	0.0446867	2.32545	9.90445	1.72191	1.97632	0.996815	9.61427	9.34624	0.876918	1.52246	1.84171	10.4885	10.1575	1.27163	1.28796	7.65828	6.96926	6.94819	6.10087	7.57357	7.6229	8.08524	7.53085	8.19345	7.74786	6.92917	1.00062	0.711928	1.47277
2.03197	1.54995	1.40543	1.43958	9.6409	0.514354	0.319806	-0.358316	8.9063	9.1752	9.45017	9.91573	10.4429	1.96596	-2.12141	0.8536	10.1575	9.34982	9.90512	9.93207	1.50851	0.0446867	9.23089	8.18493	1.72191	1.97632	0.996815	1.59634	9.10763	0.876918	1.52246	1.84171	10.1944	1.42939	1.27163	1.28796	7.91354	0.434949	0.476496	-0.245956	7.0899	7.92309	7.5865	7.56028	1.51266	8.42637	6.91764	7.9304	8.08709	1.47277
9.18942	1.54995	1.40543	1.43958	9.27054	11.1927	0.319806	8.70406	10.8788	0.773531	8.10319	10.2236	10.0842	1.96596	9.90891	0.8536	1.60071	9.29373	0.845824	9.82374	1.50851	0.0446867	2.32545	0.389409	1.72191	1.97632	0.996815	1.59634	9.73134	0.876918	1.52246	1.84171	10.0443	10.4548	1.27163	1.28796	6.28014	8.2423	0.476496	7.23016	7.89197	0.813164	7.70925	5.9166	1.51266	1.55608	6.14865	1.00062	7.49598	1.47277
2.03197	9.10414	8.20841	1.43958	10.5305	9.95315	8.99825	7.00378	9.90092	0.773531	8.7341	9.72421	9.75041	9.81897	9.25088	0.8536	10.6947	8.32305	0.845824	0.719137	1.50851	0.0446867	10.1369	9.49737	1.72191	1.97632	0.996815	9.65038	8.82979	0.876918	1.52246	9.33595	9.90153	1.42939	6.91648	1.28796	7.66946	7.08205	6.76618	5.81088	7.21084	0.813164	8.23036	6.62626	7.9283	8.47848	5.26725	1.00062	0.711928	1.47277
2.03197	9.27724	1.40543	9.53003	10.0485	11.028	8.86685	6.71234	10.1962	9.3068	0.285237	10.2977	10.0724	1.96596	-2.12141	8.80415	10.8586	7.80088	0.845824	0.719137	1.50851	0.0446867	8.56298	7.75907	8.71094	10.3067	0.996815	1.59634	1.23654	0.876918	1.52246	10.7529	10.102	1.42939	8.2578	8.60034	7.95505	7.80393	6.67617	6.1109	7.31007	7.38121	7.52104	7.30678	1.51266	8.97248	6.36942	1.00062	0.711928	1.47277
2.03197	1.54995	1.40543	1.43958	1.04424	9.90772	9.04125	6.97736	9.59628	0.773531	0.285237	9.30385	9.31066	9.76284	8.31734	9.48907	8.89136	8.382	8.67083	8.61266	1.50851	0.0446867	11.0166	8.20161	1.72191	1.97632	0.996815	8.68401	1.23654	0.876918	1.52246	9.34919	1.77344	1.42939	1.27163	1.28796	1.00326	7.19504	6.90354	5.94268	7.1498	0.813164	6.88069	7.1945	6.92031	7.58352	6.43256	6.50793	6.80721	1.47277
2.03197	9.83807	1.40543	1.43958	1.04424	9.21001	8.09016	-0.358316	10.3652	9.9071	9.34286	10.1332	9.37944	9.6863	9.53992	10.3002	11.0725	9.20588	0.845824	0.719137	1.50851	0.0446867	2.32545	9.66489	1.72191	9.73515	0.996815	9.4322	9.23637	0.876918	8.84422	1.84171	10.1039	1.42939	7.45474	1.28796	1.00326	6.29665	6.73206	-0.245956	7.27747	8.30795	7.29995	6.80043	7.45771	8.37785	7.60679	1.00062	0.711928	1.47277
9.61744	10.4622	9.71789	1.43958	1.04424	9.99623	8.19632	7.24793	10.9105	7.11669	0.285237	1.07036	9.87202	11.3237	9.02954	0.8536	10.5538	9.34878	9.27026	9.52632	1.50851	0.0446867	2.32545	9.13884	1.72191	1.97632	0.996815	7.15986	1.23654	0.876918	1.52246	10.9032	9.88671	9.04125	7.84528	1.28796	1.00326	7.23344	6.64996	6.21634	7.95414	7.70583	0.981778	6.94886	7.89852	8.55774	6.92229	7.60352	7.42916	1.47277
2.03197	9.96844	1.40543	1.43958	8.78104	0.514354	8.73348	7.36344	9.44162	9.45394	0.285237	10.0655	10.1929	11.1236	9.45633	0.8536	1.60071	9.45595	8.95761	0.719137	1.50851	0.0446867	2.32545	9.11008	1.72191	1.97632	10.1395	9.67676	10.3492	0.876918	8.30971	1.84171	11.1602	10.4565	7.82126	1.28796	6.80131	0.434949	7.21237	5.32368	6.83415	7.05936	7.15315	8.23297	7.96792	1.55608	7.16674	8.68791	0.711928	1.47277
8.91365	1.54995	1.40543	1.43958	1.04424	0.514354	9.90047	7.16589	9.51516	0.773531	9.10182	10.465	10.186	1.96596	9.03584	0.8536	1.60071	8.39596	0.845824	10.4417	1.50851	0.0446867	2.32545	9.84063	1.72191	1.97632	0.996815	1.59634	1.23654	0.876918	1.52246	10.241	12.0827	1.42939	1.27163	1.28796	1.00326	0.434949	7.46799	5.55528	6.71603	0.813164	7.8467	8.16918	1.51266	1.55608	6.12115	1.00062	7.58938	1.47277
2.03197	1.54995	1.40543	1.43958	9.67508	7.97631	0.319806	-0.358316	9.29535	0.773531	0.285237	10.5437	9.38281	11.1736	9.68663	9.52694	8.65483	8.25406	0.845824	8.56166	1.50851	0.0446867	2.32545	0.389409	8.44104	1.97632	8.64842	9.62018	9.96792	0.876918	1.52246	10.7808	11.4578	10.3778	1.27163	1.28796	7.81669	4.79021	0.476496	-0.245956	6.84914	0.813164	7.75653	7.10475	8.14611	8.57274	6.66118	1.00062	6.37397	1.47277
2.03197	1.54995	1.40543	1.43958	1.04424	10.3637	0.319806	9.17601	9.13227	8.06059	0.285237	9.12833	9.43819	10.5116	-2.12141	0.8536	9.70704	8.82788	7.66944	10.8622	1.50851	0.0446867	2.32545	9.05506	1.72191	9.06354	7.90677	10.2053	1.23654	0.876918	1.52246	10.8179	10.3633	1.42939	1.27163	1.28796	1.00326	7.1017	0.476496	7.16582	7.51145	6.92887	6.44741	7.34249	7.79642	8.12703	6.68078	6.52129	8.64935	1.47277
9.07509	10.3159	1.40543	1.43958	8.66545	10.3921	0.319806	8.45522	9.85052	8.84852	9.20955	10.3918	9.36988	10.6034	-2.12141	0.8536	9.46325	8.43192	8.98534	9.62742	1.50851	0.0446867	10.1266	8.3393	1.72191	1.97632	0.996815	8.4552	9.54974	0.876918	1.52246	10.2074	1.77344	10.628	7.65427	1.28796	6.97539	7.43845	0.476496	7.38563	7.57059	7.27861	7.20481	7.58199	7.64568	8.26719	6.56849	7.16367	7.71309	1.47277
9.35114	1.54995	1.40543	1.43958	1.04424	9.54758	8.94291	8.42811	9.91697	10.1021	0.285237	9.95833	10.0898	1.96596	9.30818	9.83919	10.7612	8.74439	0.845824	8.41221	1.50851	0.0446867	2.32545	10.4329	1.72191	1.97632	0.996815	1.59634	1.23654	0.876918	1.52246	9.21093	1.77344	9.24922	1.27163	1.28796	1.00326	6.58858	7.22658	6.97612	7.49751	0.813164	7.51828	0.377194	1.51266	8.25427	6.89005	1.00062	6.33294	1.47277
2.03197	9.70052	1.40543	1.43958	8.88396	12.3442	7.62623	-0.358316	9.21624	9.0592	0.285237	1.07036	8.92101	9.47504	9.46676	0.8536	1.60071	8.66056	0.845824	0.719137	1.50851	0.0446867	10.3025	0.389409	1.72191	1.97632	0.996815	1.59634	1.23654	0.876918	1.52246	9.26303	1.77344	11.4717	6.94206	1.28796	6.46485	7.30038	6.35647	-0.245956	6.35304	6.92829	0.981778	6.56658	7.19518	1.55608	6.65338	1.00062	0.711928	1.47277
2.03197	8.31999	1.40543	1.43958	9.33322	11.5329	9.64235	7.70061	9.4423	9.31874	0.285237	10.4881	9.52185	10.8122	9.46898	0.8536	11.055	7.73807	0.845824	9.98811	1.50851	0.0446867	9.14209	9.60696	1.72191	1.97632	8.62091	9.04286	8.64211	0.876918	1.52246	1.84171	10.6817	9.39243	6.91691	1.28796	7.3906	8.2118	7.74181	6.65634	7.21759	7.73358	7.90224	7.21224	8.26257	8.86081	6.63603	1.00062	7.77794	1.47277
8.702	10.3775	1.40543	1.43958	1.04424	10.4575	9.90823	6.74845	9.67561	0.773531	0.285237	10.022	10.3568	10.7583	8.91679	8.96675	11.0524	8.52048	0.845824	0.719137	1.50851	0.0446867	2.32545	9.79474	10.106	1.97632	8.30737	9.31078	1.23654	0.876918	1.52246	1.84171	1.77344	9.15191	8.23852	1.28796	1.00326	7.23269	7.56324	5.98108	6.99629	0.813164	8.28341	7.11373	7.96152	8.61924	6.41972	1.00062	0.711928	1.47277
9.83462	9.30515	1.40543	10.0571	1.04424	10.5468	9.94752	-0.358316	10.5851	10.5709	8.9641	10.2823	8.49247	1.96596	9.28742	0.8536	10.3378	8.22535	0.845824	9.75194	1.50851	0.0446867	9.77375	0.389409	1.72191	1.97632	0.996815	6.8059	1.23654	0.876918	7.72078	1.84171	10.067	10.2927	7.53732	7.68278	1.00326	7.42971	7.37054	-0.245956	7.82211	8.10103	7.5464	6.51285	1.51266	8.49744	6.43295	1.00062	7.52404	1.47277
8.4054	8.48209	1.40543	9.19712	9.2277	9.9131	9.37355	8.24497	9.65122	9.95629	8.6365	9.72065	9.62796	11.2101	-2.12141	0.8536	10.3013	8.89998	8.08996	9.06618	8.36359	0.0446867	10.8069	8.6521	1.72191	9.76038	0.996815	9.81651	7.93891	0.876918	1.52246	9.62609	9.82784	9.93387	7.95242	7.38183	8.2378	7.5335	7.54366	6.78771	7.84095	8.13606	8.12472	6.92641	8.56684	9.10244	7.18548	7.53273	7.23669	7.43658
2.03197	10.0584	9.67236	1.43958	1.04424	10.4961	0.319806	-0.358316	9.7549	0.773531	9.66764	10.3406	10.0113	1.96596	-2.12141	8.65396	9.78964	9.94476	0.845824	9.90381	9.37718	0.0446867	2.32545	9.14264	1.72191	1.97632	0.996815	1.59634	1.23654	0.876918	1.52246	11.2312	1.77344	1.42939	7.44701	1.28796	1.00326	7.5853	0.476496	-0.245956	7.02343	0.813164	7.66724	6.96936	1.51266	8.07658	7.14727	1.00062	7.90781	7.85938
2.03197	8.80971	8.2307	8.96622	9.18418	8.94218	0.319806	10.1273	9.82606	0.773531	8.0469	10.1372	8.52842	1.96596	-2.12141	8.73758	8.4579	8.79668	9.00996	8.98625	1.50851	0.0446867	10.51	8.18168	1.72191	1.97632	0.996815	8.60228	9.01972	0.876918	1.52246	1.84171	8.7001	8.6277	6.71141	7.40285	7.38955	6.6932	0.476496	8.44528	7.50261	0.813164	7.60909	6.28015	1.51266	7.3112	6.64158	7.74476	6.87066	1.47277
2.03197	9.15664	1.40543	1.43958	8.81407	9.52612	0.319806	8.21789	10.8925	7.1419	9.34594	10.5896	7.85176	10.569	9.38043	9.45353	11.0886	8.88154	8.73706	9.53141	1.50851	0.0446867	10.5781	8.70909	1.72191	1.97632	9.86517	9.45072	9.2081	0.876918	1.52246	1.84171	10.5902	10.1924	8.16743	1.28796	6.80351	6.93998	0.476496	7.05111	8.18293	7.45713	8.3447	6.71249	8.2226	9.28794	7.09041	7.34569	7.86229	1.47277
2.03197	10.6547	10.111	1.43958	10.2058	10.978	9.67916	8.15948	8.97093	0.773531	9.88046	10.7434	10.5691	10.8632	-2.12141	8.9921	10.2448	8.77756	0.845824	9.03957	1.50851	0.0446867	9.9654	9.57987	1.72191	1.97632	0.996815	8.13546	1.23654	0.876918	8.05807	10.9378	1.77344	10.5977	9.39994	1.28796	7.85592	7.90244	7.57752	6.90337	7.03174	0.813164	8.48893	7.71294	8.43628	8.75935	6.4227	1.00062	7.30057	1.47277
2.03197	10.8783	1.40543	1.43958	9.58497	10.1239	9.1918	6.9443	10.8821	0.773531	0.285237	9.92248	9.13343	10.8181	-2.12141	0.8536	10.2836	9.03894	0.845824	9.83666	1.50851	0.0446867	8.4857	8.71019	1.72191	1.97632	9.16225	1.59634	10.4626	0.876918	1.52246	1.84171	1.77344	9.00384	8.54632	1.28796	7.82469	7.3985	7.36492	5.81654	8.07613	0.813164	8.12935	6.40931	8.46724	8.35685	6.63642	1.00062	7.87072	1.47277
2.03197	1.54995	1.40543	1.43958	9.66156	8.79534	9.40087	7.09214	8.94668	0.773531	9.19709	1.07036	9.2345	11.5693	8.63253	0.8536	10.6254	9.57407	0.845824	9.5003	1.50851	0.0446867	10.9674	8.442	1.72191	1.97632	0.996815	1.59634	8.66221	0.876918	1.52246	10.6011	11.0576	9.14784	1.27163	1.28796	7.78564	6.48505	7.03491	6.6099	5.89317	0.813164	0.981778	7.56188	8.26131	8.59331	7.27407	1.00062	7.05703	1.47277
1.12629	1.95913	0.683345	10.6562	1.07572	1.98399	10.5917	1.30932	9.65941	1.1184	0.758417	9.26531	0.360917	11.3873	9.50444	1.7499	0.464075	0.796881	1.08568	0.394163	1.93887	1.11467	9.81926	2.01629	1.82373	1.47891	1.27731	0.500486	1.4484	8.7288	9.27566	1.30496	1.04747	9.88148	1.65578	8.13961	0.880147	1.45287	7.44065	1.24051	6.94411	1.30715	6.78338	0.526086	8.33161	0.429437	0.694188	0.903177	0.433795	1.64055
1.12629	1.95913	0.683345	11.2869	1.07572	1.98399	11.2486	1.30932	10.5353	11.1916	0.758417	10.9918	9.69694	11.7365	9.79889	1.7499	0.464075	0.796881	1.08568	0.394163	11.4059	10.4368	1.0272	10.4341	1.82373	1.47891	1.27731	0.500486	1.4484	9.81579	10.1232	1.30496	8.9685	0.776755	1.65578	8.52014	0.880147	1.45287	7.92245	1.24051	7.43367	8.84522	7.66337	7.48107	8.12577	0.429437	0.694188	0.903177	0.433795	8.94661
1.12629	1.95913	0.683345	10.2656	1.07572	1.98399	10.1035	1.30932	10.3679	10.5893	0.758417	6.79534	0.360917	9.89514	9.30351	1.7499	8.86567	9.94695	1.08568	0.394163	10.901	1.11467	10.1585	2.01629	1.82373	1.47891	1.27731	0.500486	1.4484	9.51936	1.77405	1.30496	1.04747	9.00267	1.65578	7.77702	0.880147	1.45287	7.67868	1.24051	8.11606	8.56239	5.92484	0.526086	6.91153	7.44437	7.42655	0.903177	0.433795	8.49298
8.95647	1.95913	0.683345	10.606	9.16382	10.578	10.4112	1.30932	0.817447	11.3385	10.1235	9.44928	9.48814	1.11138	9.75743	1.7499	5.8261	8.89332	1.08568	9.20856	10.2014	1.11467	9.48234	2.01629	1.82373	1.47891	1.27731	0.500486	1.4484	0.643135	1.77405	9.32404	1.04747	0.776755	1.65578	8.18283	6.1762	7.87552	7.81899	1.24051	0.816508	1.30715	6.70544	6.98495	0.875122	5.77054	7.02797	0.903177	6.88759	7.95644
1.12629	1.95913	7.92665	11.3841	1.07572	1.98399	10.0626	1.30932	10.8209	10.6238	0.758417	8.5059	9.30597	10.9154	9.11071	9.99958	9.33842	10.873	1.08568	0.394163	10.5763	1.11467	1.0272	10.7989	1.82373	1.47891	1.27731	0.500486	1.4484	8.19673	9.00454	10.7042	1.04747	0.776755	1.65578	8.60387	0.880147	1.45287	7.54626	1.24051	8.07952	8.65677	6.10868	0.526086	8.07219	6.49046	8.18738	0.903177	0.433795	8.77081
1.12629	10.6862	0.683345	11.4912	1.07572	1.98399	1.21876	1.30932	0.817447	9.86082	10.2691	9.76942	7.9989	10.0743	-2.56035	1.7499	0.464075	9.5249	1.08568	0.394163	10.7208	9.60696	1.0272	2.01629	1.82373	1.47891	1.27731	9.97368	1.4484	0.643135	1.77405	1.30496	1.04747	0.776755	7.66857	9.20057	0.880147	1.45287	1.07835	1.24051	0.816508	7.9551	7.30184	6.11335	6.93443	0.429437	7.32568	0.903177	0.433795	8.44133
1.12629	1.95913	0.683345	10.5077	1.07572	1.98399	10.5092	10.2021	10.1876	10.0782	0.758417	10.1414	7.94474	10.2288	9.33002	1.7499	9.55123	9.18268	1.08568	0.394163	9.95016	10.4864	9.46365	10.6767	1.82373	1.47891	1.27731	8.90895	1.4484	0.643135	1.77405	9.08606	9.10309	0.776755	1.65578	8.63963	0.880147	1.45287	7.74751	7.56176	7.93942	8.79849	7.76484	7.19038	7.42024	7.84671	7.27653	0.903177	0.433795	8.39246
1.12629	1.95913	0.683345	10.2303	1.07572	1.98399	10.9316	1.30932	10.7073	1.1184	0.758417	0.290737	11.0132	9.82487	10.0045	1.7499	7.71436	0.796881	1.08568	0.394163	9.13202	9.59142	9.6299	2.01629	1.82373	1.47891	1.27731	0.500486	1.4484	10.1312	1.77405	1.30496	11.0496	10.0871	1.65578	7.91722	0.880147	1.45287	7.72289	1.24051	7.91281	1.30715	0.431377	0.526086	7.5582	7.31067	0.694188	0.903177	0.433795	8.56224
6.76945	8.32089	7.55392	10.1355	1.07572	1.98399	10.7437	1.30932	10.0859	10.5506	0.758417	9.46498	9.33916	1.11138	9.59544	7.18527	9.0671	9.35788	9.4286	8.69624	10.5396	8.91681	9.19239	10.6607	1.82373	1.47891	8.11308	8.67385	1.4484	8.70358	8.87984	9.33438	9.51387	8.41609	8.02518	8.4831	0.880147	1.45287	8.37409	1.24051	8.00642	8.94816	7.58978	7.60831	0.875122	7.85702	7.64664	7.56046	7.47074	9.32224
1.12629	9.0246	0.683345	9.51021	1.07572	1.98399	1.21876	9.09814	9.94314	8.78866	0.758417	9.12492	0.360917	1.11138	-2.56035	1.7499	8.17197	9.65121	9.36325	9.02998	10.8701	8.99523	9.34255	10.6757	1.82373	1.47891	1.27731	0.500486	1.4484	9.27181	1.77405	1.30496	1.04747	0.776755	7.39788	7.31674	0.880147	1.45287	1.07835	7.70578	7.2677	7.3656	7.0294	0.526086	0.875122	6.52682	7.70764	7.48004	7.2609	8.87126
1.12629	1.95913	0.683345	10.1572	1.07572	1.98399	1.21876	1.30932	0.817447	1.1184	0.758417	0.290737	9.45332	1.11138	8.68912	1.7499	0.464075	9.19181	9.75963	0.394163	1.93887	1.11467	1.0272	2.01629	1.82373	1.47891	1.27731	0.500486	1.4484	0.643135	9.64398	10.149	1.04747	0.776755	1.65578	7.68773	0.880147	1.45287	1.07835	1.24051	0.816508	1.30715	0.431377	7.19826	0.875122	0.429437	5.77016	6.91096	0.433795	1.64055
1.12629	1.95913	8.14332	11.7442	8.2244	1.98399	9.63595	1.30932	10.6606	7.27198	0.758417	0.290737	9.68755	1.11138	9.25532	1.7499	8.86099	0.796881	1.08568	0.394163	9.78753	10.4082	1.0272	10.8144	1.82373	1.47891	1.27731	0.500486	1.4484	9.46334	9.32594	8.89788	1.04747	8.30527	1.65578	9.16506	6.77469	1.45287	7.66917	1.24051	7.86629	7.45623	0.431377	7.84622	0.875122	7.15789	0.694188	0.903177	0.433795	8.03231
1.12629	1.95913	0.683345	11.0843	1.07572	1.98399	9.55486	1.30932	10.2204	1.1184	0.758417	8.42185	9.98023	1.11138	9.3702	1.7499	0.464075	10.3719	7.75147	9.7066	1.93887	1.11467	1.0272	10.3401	1.82373	1.47891	1.27731	8.89076	1.4484	0.643135	1.77405	1.30496	1.04747	0.776755	1.65578	8.55433	0.880147	1.45287	7.3643	1.24051	6.79111	1.30715	6.42403	0.526086	0.875122	0.429437	7.35628	5.74734	7.52759	1.64055
1.12629	8.01729	0.683345	0.963203	1.07572	1.98399	9.70824	1.30932	10.0446	10.6918	9.41936	8.99166	9.39173	1.11138	8.91004	1.7499	0.464075	9.80777	1.08568	9.71626	10.6665	1.11467	9.90914	2.01629	1.82373	1.47891	1.27731	0.500486	1.4484	0.643135	1.77405	10.5753	1.04747	0.776755	7.61458	0.941588	0.880147	1.45287	6.9884	1.24051	7.59568	8.30413	6.90516	7.25108	0.875122	0.429437	7.21414	0.903177	8.35917	8.08675
1.12629	1.95913	0.683345	11.2871	1.07572	1.98399	10.7069	1.30932	0.817447	10.8949	0.758417	0.290737	8.62202	1.11138	-2.56035	1.7499	0.464075	0.796881	1.08568	0.394163	1.93887	9.62551	1.0272	2.01629	1.82373	1.47891	1.27731	9.10729	1.4484	0.643135	1.77405	1.30496	1.04747	0.776755	1.65578	8.60979	0.880147	1.45287	7.59384	1.24051	0.816508	1.30715	0.431377	7.10486	0.875122	0.429437	0.694188	0.903177	0.433795	1.64055
1.12629	9.45779	0.683345	10.0471	1.07572	1.98399	1.21876	9.66639	0.817447	10.1017	0.758417	8.84257	8.71966	1.11138	-2.56035	1.7499	7.38824	9.99807	1.08568	0.394163	9.448	1.11467	1.0272	10.9519	1.82373	1.47891	1.27731	8.32062	8.89498	0.643135	1.77405	9.5829	1.04747	0.776755	6.91162	7.18517	0.880147	1.45287	1.07835	7.65413	0.816508	8.07543	6.52041	6.93431	0.875122	6.51892	7.80522	0.903177	0.433795	7.15099
1.12629	1.95913	0.683345	10.8013	10.3812	12.0668	11.5209	1.30932	9.04337	1.1184	0.758417	0.290737	0.360917	9.63631	-2.56035	1.7499	8.46331	8.38334	1.08568	10.1607	10.8014	1.11467	1.0272	2.01629	1.82373	1.47891	1.27731	0.500486	1.4484	0.643135	1.77405	1.30496	1.04747	9.69678	1.65578	7.93527	7.67803	8.27363	8.20731	1.24051	7.26851	1.30715	0.431377	0.526086	7.62994	7.0695	6.96347	0.903177	7.82414	8.30205
1.12629	11.0827	0.683345	0.963203	9.48727	1.98399	1.21876	1.30932	10.5877	1.1184	0.758417	9.34622	9.23815	1.11138	8.17324	1.7499	6.26371	6.46579	1.08568	9.67242	1.93887	1.11467	8.9821	10.9299	1.82373	1.47891	8.86667	8.05504	10.32	0.643135	1.77405	1.30496	9.61209	10.7707	8.71041	0.941588	7.77252	1.45287	1.07835	1.24051	7.65343	1.30715	7.00301	0.526086	0.875122	6.58002	6.18366	0.903177	7.11262	1.64055
8.91076	9.9833	0.683345	0.963203	1.07572	12.6693	1.21876	10.3228	10.3746	9.74375	9.54289	9.91222	8.92982	1.11138	8.81242	1.7499	0.464075	9.75173	1.08568	10.5535	1.93887	1.11467	10.2078	10.2	1.82373	1.47891	1.27731	0.500486	1.4484	0.643135	1.77405	1.30496	9.8807	0.776755	7.93585	0.941588	0.880147	8.99266	1.07835	7.99991	7.57014	7.34208	7.19157	7.131	0.875122	0.429437	7.20696	0.903177	7.89297	1.64055
1.12629	10.4605	8.74484	8.11405	1.07572	1.98399	9.13125	1.30932	10.6043	8.78544	0.758417	9.55768	9.21123	1.11138	-2.56035	1.7499	8.25425	0.796881	9.88625	9.35731	1.93887	1.11467	8.3615	11.3149	1.82373	1.47891	1.27731	0.500486	10.666	0.643135	7.39075	1.30496	9.87552	9.05869	8.39273	6.11608	0.880147	1.45287	7.20922	1.24051	8.86367	6.89968	7.53313	7.41947	0.875122	7.82288	0.694188	8.18367	7.13258	1.64055
8.16578	1.95913	0.683345	0.963203	9.12598	9.80818	1.21876	9.75811	10.3445	10.2076	0.758417	9.12021	9.27315	1.11138	-2.56035	1.7499	0.464075	9.92085	1.08568	9.78558	9.55928	1.11467	1.0272	2.01629	1.82373	1.47891	8.96274	9.06746	1.4484	0.643135	1.77405	9.25949	7.97807	9.54607	1.65578	0.941588	7.48337	8.02615	1.07835	7.84919	7.11586	8.14559	7.08685	7.91044	0.875122	0.429437	8.01841	0.903177	6.85633	7.64496
1.12629	9.04336	10.6802	0.963203	10.4509	10.9693	1.21876	1.30932	9.84919	9.5291	0.758417	8.97767	9.81684	1.11138	-2.56035	1.7499	0.464075	0.796881	1.08568	9.19185	1.93887	1.11467	1.0272	10.8086	1.82373	1.47891	1.27731	9.70325	1.4484	0.643135	8.33314	1.30496	1.04747	10.1435	7.64814	0.941588	8.06585	7.07903	1.07835	1.24051	6.10623	7.88336	6.14702	7.33851	0.875122	0.429437	0.694188	0.903177	6.89161	1.64055
1.12629	1.95913	0.683345	0.963203	1.07572	1.98399	10.2345	1.30932	0.817447	1.1184	0.758417	9.5714	10.1112	1.11138	9.04783	1.7499	8.05618	9.22022	9.86166	8.8965	1.93887	1.11467	9.91513	11.1197	1.82373	1.47891	10.3609	9.20815	1.4484	0.643135	1.77405	1.30496	9.31514	9.34066	1.65578	0.941588	0.880147	1.45287	7.43245	1.24051	0.816508	1.30715	6.5685	7.54204	0.875122	6.42394	6.9566	7.6278	7.10241	1.64055
1.12629	1.95913	0.683345	0.963203	8.60643	11.4833	1.21876	8.59806	10.6313	10.1029	0.758417	9.98558	8.73527	10.4844	-2.56035	8.96583	7.74413	9.57751	1.08568	10.0539	1.93887	1.11467	8.28195	11.2327	1.82373	1.47891	1.27731	8.78683	9.93281	0.643135	1.77405	1.30496	9.29409	0.776755	1.65578	0.941588	6.86393	7.88976	1.07835	8.224	7.8342	8.04964	7.69227	7.33823	7.74909	7.75168	7.14434	0.903177	7.80615	1.64055
1.12629	9.22489	8.28406	0.963203	1.07572	10.5444	8.82657	10.5832	10.5053	9.01591	0.758417	9.79916	9.43759	10.5977	-2.56035	9.30357	7.90159	10.2139	1.08568	10.3517	1.93887	1.11467	10.0206	2.01629	1.82373	10.4985	9.45371	9.19922	9.42107	0.643135	1.77405	10.0341	8.2348	10.5753	7.74038	0.941588	0.880147	7.42624	8.18946	8.78569	7.95378	7.69283	7.47027	7.83462	7.7488	6.55862	7.70865	0.903177	7.90196	1.64055
10.0535	1.95913	0.683345	0.963203	10.441	1.98399	9.62647	1.30932	10.8352	9.04744	0.758417	9.74651	9.77073	1.11138	9.27726	1.7499	7.02866	9.16811	12.1777	10.1268	1.93887	1.11467	9.89063	2.01629	1.82373	1.47891	1.27731	0.500486	9.5903	0.643135	1.77405	1.30496	1.04747	11.529	1.65578	0.941588	7.43463	1.45287	7.33065	1.24051	7.94356	7.3239	7.36341	7.26155	0.875122	6.74255	7.26412	9.13268	7.38804	1.64055
8.84521	1.95913	0.683345	0.963203	9.79198	10.5722	10.2249	9.63866	10.526	1.1184	9.91488	10.3222	10.0063	9.45792	-2.56035	1.7499	8.96061	10.5138	1.08568	0.394163	1.93887	1.11467	1.0272	11.4799	1.82373	1.47891	8.94734	0.500486	9.623	0.643135	1.77405	1.30496	1.04747	8.79543	1.65578	0.941588	7.10694	8.11277	7.33522	7.67994	7.90665	1.30715	7.99076	7.63129	7.68513	6.96683	7.94572	0.903177	0.433795	1.64055
1.12629	9.96761	0.683345	0.963203	1.07572	12.4208	10.6006	9.9663	10.7433	8.65323	0.758417	8.30806	8.23898	10.9982	-2.56035	1.7499	8.17686	10.2289	10.3837	9.52158	1.93887	1.11467	8.21173	10.2642	1.82373	8.75839	1.27731	8.51122	9.24061	0.643135	1.77405	9.77864	7.22942	9.21787	7.86525	0.941588	8.01859	8.79368	8.17093	8.13557	8.4458	7.41946	6.85548	6.37245	7.6132	6.98063	7.73557	8.3232	7.0955	1.64055
1.12629	9.87024	8.50859	0.963203	10.5976	10.831	1.21876	8.62192	10.6101	10.0081	0.758417	9.55866	9.22006	7.79625	-2.56035	1.7499	8.56822	0.796881	1.08568	9.18935	1.93887	1.11467	1.0272	2.01629	1.82373	5.28349	1.27731	0.500486	1.4484	0.643135	1.77405	9.9902	9.06529	0.776755	8.27539	0.941588	8.10055	8.09344	1.07835	7.40456	7.9448	8.25717	7.69254	7.39552	6.57077	6.90268	0.694188	0.903177	7.77504	1.64055
1.12629	10.5279	0.683345	8.91796	10.0448	11.4472	9.49329	1.30932	11.0676	9.70305	10.8242	0.290737	9.18052	10.1	8.99812	1.7499	8.31953	10.7376	9.31345	8.30471	1.93887	1.11467	1.0272	11.5996	10.7686	8.60854	1.27731	8.34914	1.4484	0.643135	1.77405	8.37245	7.74509	9.56303	8.29154	8.16713	7.98917	8.63318	7.21748	1.24051	7.89665	7.67096	0.431377	6.97582	7.86712	6.348	8.05012	7.40203	7.20427	7.77977
8.69888	1.95913	0.683345	0.963203	1.07572	12.6995	9.43292	1.30932	9.25273	1.1184	10.068	9.94346	9.4377	9.8097	9.62123	1.7499	9.68007	0.796881	1.08568	10.1107	1.93887	1.11467	9.30281	2.01629	1.82373	9.37119	1.27731	0.500486	1.4484	0.643135	1.77405	11.0761	1.04747	0.776755	1.65578	0.941588	0.880147	9.12744	7.78715	1.24051	6.9711	1.30715	7.39515	7.16703	7.56358	8.10416	0.694188	0.903177	7.59808	1.64055
1.12629	1.95913	8.59391	0.963203	1.07572	1.98399	1.21876	1.30932	10.4847	9.9861	9.13576	8.08501	0.360917	1.11138	9.7952	1.7499	7.76926	0.796881	8.61125	0.394163	1.93887	8.80156	8.74742	2.01629	1.82373	1.47891	1.27731	7.76129	1.4484	0.643135	1.77405	10.2037	10.1216	0.776755	1.65578	0.941588	0.880147	1.45287	1.07835	1.24051	7.29738	8.41003	6.07273	0.526086	0.875122	7.0258	0.694188	6.87785	0.433795	1.64055
8.67617	1.95913	6.81538	0.963203	9.62312	1.98399	9.63366	9.82489	11.3655	7.91945	0.758417	10.3571	9.20669	9.0854	9.57203	1.7499	9.52091	10.1729	1.08568	9.01724	1.93887	1.11467	9.73287	10.096	1.82373	8.93286	1.27731	0.500486	1.4484	0.643135	1.77405	10.2002	1.04747	9.47424	1.65578	0.941588	7.47787	1.45287	7.10406	7.88308	8.34026	8.59324	8.45054	6.93038	7.01037	7.41292	7.39151	0.903177	6.71778	1.64055
9.24289	1.95913	0.683345	0.963203	9.67776	11.5193	1.21876	1.30932	10.3056	1.1184	0.758417	10.0581	9.51653	10.7671	9.2151	1.7499	6.64424	10.0972	1.08568	9.16905	1.93887	1.11467	1.0272	10.5481	10.2597	1.47891	1.27731	8.94391	1.4484	0.643135	1.77405	1.30496	8.96548	0.776755	1.65578	0.941588	7.29587	8.68278	1.07835	1.24051	7.64292	1.30715	7.52231	7.66047	7.9815	6.89142	7.43061	0.903177	6.71876	1.64055
1.12629	1.95913	0.683345	0.963203	1.07572	12.833	1.21876	1.30932	10.0951	10.3058	9.46769	8.42199	9.70841	10.6467	-2.56035	1.7499	9.35392	9.63119	1.08568	0.394163	1.93887	1.11467	8.82958	2.01629	1.82373	1.47891	1.27731	0.500486	9.68541	0.643135	1.77405	10.0563	9.06854	0.776755	1.65578	0.941588	0.880147	8.67113	1.07835	1.24051	7.27336	1.30715	6.53271	6.83205	7.92283	7.18003	7.01771	0.903177	0.433795	1.64055
1.12629	1.95913	0.683345	0.963203	9.63747	1.98399	8.12435	1.30932	10.2712	1.1184	10.2721	10.3892	8.25905	10.8036	9.24619	1.7499	8.57842	9.10912	1.08568	8.4448	1.93887	1.11467	8.91717	2.01629	1.82373	1.47891	6.66051	9.52234	8.87633	0.643135	1.77405	1.30496	8.9592	7.8974	1.65578	0.941588	7.18042	1.45287	7.15037	1.24051	7.61585	1.30715	7.52446	7.30502	7.9767	7.42268	7.3769	0.903177	7.14465	1.64055
[truncated: 8 more columns]

## Sheet: U2OS_UMAP_clustering
Supp. Data8.Tab12 Clustering performance of different methods					Supp. Data8.Tab13 UMAP points for U2OS cells achieved from dlfq-based cell representation. The last column is the labels of the cells.						Supp. Data8.Tab14 UMAP points for U2OS cells achieved from maxlfq-based cell representation. The last column is the labels of the cells.						Supp. Data8.Tab15 UMAP points for U2OS cells achieved from top3-based cell representation. The last column is the labels of the cells.						Supp. Data8.Tab16 UMAP points for U2OS cells achieved from top1-based cell representation. The last column is the labels of the cells.						Supp. Data8.Tab17 UMAP points for U2OS cells achieved from MCP-based cell representation. The last column is the labels of the cells.
Method	ARI	ASW	NMI		Index	UMAP1	UMAP2	cluster			Index	UMAP1	UMAP2	cluster			Index	UMAP1	UMAP2	cluster			Index	UMAP1	UMAP2	cluster			Index	UMAP1	UMAP2	cluster
dlfq	0.9279	0.9458	0.8867		1	-1.72565	0.950781	IFN-y			1	-2.8602	1.37841	IFN-y			1	-1.84985	-2.09876	IFN-y			1	-0.514846	0.729298	IFN-y			1	-0.734152	-1.5121	IFN-y
maxlfq	0.8929	0.9185	0.8216		2	-1.19132	2.25225	IFN-y			2	-1.89886	0.346349	IFN-y			2	-2.5951	-2.22713	IFN-y			2	-0.832416	0.826612	IFN-y			2	-1.55437	-1.19543	IFN-y
top3	0.7594	0.8122	0.6591		3	-2.68282	0.605903	IFN-y			3	-2.83849	2.13171	IFN-y			3	-0.872839	-1.60915	IFN-y			3	0.98571	1.61943	IFN-y			3	-0.997091	-1.73366	IFN-y
top1	0.6967	0.7607	0.5969		4	-2.36193	0.621946	IFN-y			4	-2.89941	1.89684	IFN-y			4	-1.18691	-1.65293	IFN-y			4	1.04791	1.82963	IFN-y			4	-0.797132	-1.77892	IFN-y
MVDEA	0.9279	0.9458	0.8867		5	-2.49214	0.386287	IFN-y			5	-2.38742	1.23872	IFN-y			5	-1.52871	-1.36333	IFN-y			5	0.457229	1.03089	IFN-y			5	-1.43847	-0.75693	IFN-y
hurdle	0.8585	0.8916	0.7746		6	-1.54361	2.48854	IFN-y			6	-1.70618	0.0745161	IFN-y			6	-2.67617	-1.99977	IFN-y			6	0.0608049	2.02651	IFN-y			6	-1.82608	-0.506322	IFN-y
					7	-0.6669	-0.0935614	IFN-y			7	-0.0953497	0.19545	IFN-y			7	0.035059	1.75214	IFN-y			7	-0.649522	-1.42992	IFN-y			7	-0.887071	-0.267923	IFN-y
					8	-1.2152	2.36783	IFN-y			8	-1.80218	-0.0325346	IFN-y			8	-2.32049	-1.76543	IFN-y			8	-0.443686	1.02836	IFN-y			8	-1.58591	-0.366172	IFN-y
					9	-1.87055	2.10887	IFN-y			9	-1.08423	1.83566	IFN-y			9	-0.686424	-1.74065	IFN-y			9	0.147302	2.38311	IFN-y			9	-1.49648	-2.63056	IFN-y
					10	-1.53192	2.56565	IFN-y			10	-1.82272	0.37361	IFN-y			10	-0.69196	-2.78403	IFN-y			10	-0.406776	1.44696	IFN-y			10	-1.6744	-1.43292	IFN-y
					11	-2.41799	2.42455	IFN-y			11	-1.34083	1.21056	IFN-y			11	-0.767554	-2.20245	IFN-y			11	1.01181	2.27845	IFN-y			11	-1.98075	-1.80542	IFN-y
					12	-2.35721	1.12797	IFN-y			12	-2.35989	1.52237	IFN-y			12	-0.366433	-1.72942	IFN-y			12	0.467248	3.87198	IFN-y			12	-1.26424	-2.04666	IFN-y
					13	-0.607488	1.69621	IFN-y			13	-0.764871	-0.350808	IFN-y			13	-2.23855	-1.45328	IFN-y			13	0.167991	0.472741	IFN-y			13	-0.34308	-0.648342	IFN-y
					14	-2.91747	1.45317	IFN-y			14	-1.0662	1.48744	IFN-y			14	-0.436822	-0.113285	IFN-y			14	0.954483	2.84739	IFN-y			14	-2.39689	-1.60092	IFN-y
					15	-1.96142	0.188243	IFN-y			15	0.191987	1.26276	IFN-y			15	-1.55434	-2.12251	IFN-y			15	-0.0106094	1.0658	IFN-y			15	-0.926605	-2.16466	IFN-y
					16	-3.08838	1.76226	IFN-y			16	-2.60822	0.719239	IFN-y			16	-2.37048	-2.23754	IFN-y			16	-0.603312	1.20077	IFN-y			16	-1.58939	-1.73669	IFN-y
					17	-1.87644	0.373451	IFN-y			17	-0.275155	1.46863	IFN-y			17	0.123073	-1.67377	IFN-y			17	1.13172	3.13962	IFN-y			17	-0.133156	-1.96813	IFN-y
					18	-3.25483	1.64407	IFN-y			18	-0.273179	2.0171	IFN-y			18	-1.8103	-2.28341	IFN-y			18	-0.130254	2.35913	IFN-y			18	-0.662214	-2.22384	IFN-y
					19	-3.00225	0.384113	IFN-y			19	-0.076053	1.94478	IFN-y			19	-0.22494	-1.87801	IFN-y			19	0.710979	-1.43032	IFN-y			19	-0.282767	-2.49655	IFN-y
					20	-1.10245	1.95794	IFN-y			20	-0.899653	-0.248693	IFN-y			20	0.16994	1.2249	IFN-y			20	-0.758369	-0.253521	IFN-y			20	-1.19874	-0.352998	IFN-y
					21	-2.32041	0.0973462	IFN-y			21	-0.43135	1.02425	IFN-y			21	-2.18357	-2.7658	IFN-y			21	1.01029	3.05117	IFN-y			21	-0.641816	-2.59902	IFN-y
					22	-2.83522	1.03558	IFN-y			22	-1.95757	1.88859	IFN-y			22	-2.03048	-2.78784	IFN-y			22	-0.229904	3.18614	IFN-y			22	-1.63949	-2.98141	IFN-y
					23	-2.60104	1.68398	IFN-y			23	-2.3712	2.48383	IFN-y			23	-0.344268	-2.86073	IFN-y			23	0.246815	3.43087	IFN-y			23	-2.2038	-2.07358	IFN-y
					24	-1.06691	-0.81204	IFN-y			24	-1.90361	1.48854	IFN-y			24	-2.46696	-1.31677	IFN-y			24	-0.525226	1.37845	IFN-y			24	-2.16722	-1.14555	IFN-y
					25	-1.60423	0.940709	IFN-y			25	-2.78135	1.41448	IFN-y			25	-1.35679	-2.2082	IFN-y			25	1.27982	1.92054	IFN-y			25	-0.860641	-1.55688	IFN-y
					26	-2.77158	0.85169	IFN-y			26	-3.2021	1.66997	IFN-y			26	-0.383152	-2.02129	IFN-y			26	1.32027	2.54064	IFN-y			26	-1.49644	-1.84682	IFN-y
					27	-1.98196	0.821486	IFN-y			27	-2.90794	1.61079	IFN-y			27	-0.887632	-1.93432	IFN-y			27	0.0575743	3.43141	IFN-y			27	-0.449842	-1.67059	IFN-y
					28	-1.11844	0.92811	IFN-y			28	-0.648122	0.552899	IFN-y			28	0.264755	-0.251087	IFN-y			28	1.44871	1.55016	IFN-y			28	-1.79208	-0.915122	IFN-y
					29	-3.19192	1.02422	IFN-y			29	-1.33415	1.90014	IFN-y			29	-1.91595	-2.79783	IFN-y			29	-0.906016	0.362177	IFN-y			29	-0.282415	-2.11217	IFN-y
					30	-2.63359	1.08639	IFN-y			30	-1.29794	1.70515	IFN-y			30	-1.32495	-2.58104	IFN-y			30	1.51959	2.6942	IFN-y			30	-1.91827	-2.74566	IFN-y
					31	-3.24445	0.992882	IFN-y			31	-1.4561	2.22887	IFN-y			31	-0.261745	-2.63075	IFN-y			31	0.0713639	3.33011	IFN-y			31	-0.0526769	-2.21283	IFN-y
					32	-2.8858	0.00513288	IFN-y			32	0.341192	1.91669	IFN-y			32	-1.93592	-3.04345	IFN-y			32	-0.327728	3.39917	IFN-y			32	0.0166607	-2.39357	IFN-y
					33	-1.62991	1.28396	IFN-y			33	-1.58338	1.60296	IFN-y			33	0.0771046	-0.501566	IFN-y			33	1.39584	1.99412	IFN-y			33	-0.815864	-1.33229	IFN-y
					34	-2.78363	2.09226	IFN-y			34	-2.30963	2.46625	IFN-y			34	-0.504967	-2.69781	IFN-y			34	0.717196	2.39932	IFN-y			34	-2.4157	-2.02034	IFN-y
					35	-0.899432	2.23755	IFN-y			35	-1.47351	-0.140353	IFN-y			35	-0.900497	-2.70289	IFN-y			35	-0.81915	1.24177	IFN-y			35	-1.57011	-0.242416	IFN-y
					36	-2.64044	0.633911	IFN-y			36	-2.73167	1.94352	IFN-y			36	-0.237935	-2.69408	IFN-y			36	0.997037	2.93618	IFN-y			36	-1.39195	-2.25925	IFN-y
					37	-0.786441	1.93505	IFN-y			37	-1.40021	0.532074	IFN-y			37	-2.62359	-1.99414	IFN-y			37	-0.858301	0.86471	IFN-y			37	-2.01289	-0.616336	IFN-y
					38	-2.28913	-0.18208	IFN-y			38	-0.15097	0.679856	IFN-y			38	-0.00995965	-0.574675	IFN-y			38	-0.0599308	3.37436	IFN-y			38	-1.0171	-0.896439	IFN-y
					39	-1.89427	2.52105	IFN-y			39	-1.78928	0.8638	IFN-y			39	-1.23271	-0.969942	IFN-y			39	0.353296	0.00579076	IFN-y			39	-1.84663	-1.36554	IFN-y
					40	2.88702	-0.726669	Control			40	2.44146	-2.42957	Control			40	2.02441	1.95198	Control			40	0.50212	-1.79216	Control			40	1.67977	1.98157	Control
					41	3.00411	-1.14749	Control			41	2.74047	-1.79038	Control			41	2.29331	2.99065	Control			41	-0.823438	-3.26969	Control			41	1.86455	2.94602	Control
					42	0.0278	0.490042	Control			42	-0.796987	-0.402247	Control			42	0.262078	1.38492	Control			42	0.158632	-0.719452	Control			42	0.150679	-0.402918	Control
					43	2.16081	-1.7649	Control			43	1.2396	-0.814954	Control			43	1.28062	1.45072	Control			43	-0.424301	-2.49118	Control			43	1.08575	3.00142	Control
					44	2.58245	-0.992446	Control			44	2.50559	-1.44464	Control			44	0.537579	1.59358	Control			44	0.246857	-1.87666	Control			44	1.55942	2.07367	Control
					45	-0.500216	0.0132341	Control			45	-0.0737101	0.57357	Control			45	-0.00435216	-1.30238	Control			45	-0.651889	-3.47217	Control			45	0.620003	0.934541	Control
					46	3.09856	-2.25678	Control			46	-1.34887	0.244001	Control			46	0.890603	0.507637	Control			46	0.777496	-1.31833	Control			46	0.39456	1.78449	Control
					47	1.99799	-0.376203	Control			47	1.47673	-2.32321	Control			47	1.71303	1.26874	Control			47	-0.27816	-2.66359	Control			47	1.06485	1.68047	Control
					48	2.22332	-1.88573	Control			48	1.78225	-1.02201	Control			48	1.78627	3.02592	Control			48	-0.173032	-2.8571	Control			48	0.872069	2.44887	Control
					49	2.73954	-1.3362	Control			49	2.993	-1.81831	Control			49	2.2981	2.75231	Control			49	-1.34375	-2.20354	Control			49	1.35017	2.68952	Control
					50	2.6929	-1.98677	Control			50	2.29913	-2.81739	Control			50	0.504625	1.82126	Control			50	-1.05317	-1.3158	Control			50	1.99694	1.56072	Control
					51	0.652275	-1.02819	Control			51	0.357292	-0.910701	Control			51	1.48838	1.54976	Control			51	-0.756313	-0.889579	Control			51	1.26675	0.0269262	Control
					52	1.04784	-1.44529	Control			52	0.77742	-0.464721	Control			52	1.91272	1.56503	Control			52	0.339845	-0.888965	Control			52	1.8542	0.986236	Control
					53	2.59633	-1.52933	Control			53	2.07019	-2.66238	Control			53	0.461686	2.00289	Control			53	-0.069794	-2.72057	Control			53	1.46708	1.76887	Control
					54	2.24143	-1.42906	Control			54	2.11427	-0.715176	Control			54	1.73156	3.51031	Control			54	-0.830633	-1.92715	Control			54	0.762635	3.08311	Control
					55	1.71129	-0.495435	Control			55	1.28372	-2.12702	Control			55	0.398073	2.415	Control			55	0.0741	-2.95214	Control			55	0.771035	1.39803	Control
					56	3.15077	-1.43719	Control			56	1.75521	-2.65029	Control			56	0.443949	0.964864	Control			56	-1.29205	-2.16487	Control			56	2.23973	1.66332	Control
					57	3.36116	-1.0866	Control			57	3.09558	-2.02787	Control			57	1.23612	2.98709	Control			57	1.03314	-2.23999	Control			57	1.79748	3.18495	Control
					58	2.12048	-2.4961	Control			58	2.14119	-2.88229	Control			58	1.29577	1.01751	Control			58	-1.09782	-2.70213	Control			58	2.14422	2.08637	Control
					59	0.301219	0.205231	Control			59	0.0846997	-0.563423	Control			59	0.78835	1.47845	Control			59	-0.0159588	-1.27548	Control			59	0.381561	0.0837016	Control
					60	2.52336	-2.1613	Control			60	2.56274	-2.47183	Control			60	1.41768	1.83662	Control			60	-0.248671	-2.27352	Control			60	1.91561	1.65394	Control
					61	2.98743	-0.66151	Control			61	2.16982	-2.29183	Control			61	2.09622	2.46686	Control			61	-0.533309	-2.84966	Control			61	1.3052	2.94933	Control
					62	3.35859	-1.63547	Control			62	2.9434	-2.11978	Control			62	2.46598	2.84438	Control			62	-1.17953	-2.05971	Control			62	2.13494	2.79745	Control
					63	1.13398	-0.631194	Control			63	-0.353453	-0.876911	Control			63	0.991506	2.75305	Control			63	0.158732	-3.2636	Control			63	1.01816	1.04063	Control
					64	3.40159	-2.12219	Control			64	1.53503	-1.61412	Control			64	-0.371239	0.142762	Control			64	-1.27132	1.0299	Control			64	0.0354685	1.08317	Control
					65	3.17336	-1.65384	Control			65	2.7392	-1.74989	Control			65	2.33806	3.12949	Control			65	-1.24028	-2.44439	Control			65	1.78252	2.05784	Control
					66	1.84687	-1.32295	Control			66	1.56952	-2.48237	Control			66	0.446119	2.88629	Control			66	0.636699	-2.86662	Control			66	1.31742	1.34371	Control
					67	0.658682	-0.421467	Control			67	2.24717	-0.34634	Control			67	1.52691	3.02445	Control			67	-1.30417	-3.04982	Control			67	0.443242	-2.31388	Control
					68	3.66771	-1.81251	Control			68	3.20533	-1.56447	Control			68	1.67331	3.58842	Control			68	-1.46333	-2.80667	Control			68	2.19429	2.92743	Control
					69	1.75538	-0.661718	Control			69	0.441855	0.143538	Control			69	0.907376	3.13175	Control			69	1.00631	-1.42158	Control			69	0.653593	2.10159	Control
					70	2.43902	-2.06527	Control			70	2.44841	-0.587078	Control			70	2.25697	3.02017	Control			70	0.0464886	-3.39147	Control			70	2.27912	2.77464	Control
					71	3.05467	-2.08693	Control			71	2.85931	-1.71616	Control			71	2.08519	2.9773	Control			71	-1.0264	-2.49475	Control			71	2.16674	2.56	Control
					72	2.25699	-1.32559	Control			72	1.93394	-1.18841	Control			72	2.55019	3.03238	Control			72	0.552538	-1.75965	Control			72	1.82347	2.29784	Control
					73	2.84135	-2.11109	Control			73	1.83788	-1.12858	Control			73	0.632564	2.22102	Control			73	0.195176	-2.30248	Control			73	2.37497	2.2429	Control
					74	2.7303	-2.4748	Control			74	2.38255	-2.31786	Control			74	0.460342	2.94038	Control			74	0.535236	-2.92843	Control			74	1.71237	1.57296	Control
					75	-2.42744	1.77135	IFN-y			75	-2.36166	2.2432	IFN-y			75	-0.73263	-2.65505	IFN-y			75	0.132444	2.13572	IFN-y			75	-1.41065	-2.20953	IFN-y
					76	-3.00685	2.01282	IFN-y			76	-1.76082	2.16387	IFN-y			76	-0.620366	-2.16013	IFN-y			76	1.22133	2.34417	IFN-y			76	-2.06176	-2.20631	IFN-y
					77	-2.3452	1.61764	IFN-y			77	-2.60155	2.31511	IFN-y			77	-0.0838241	-1.27452	IFN-y			77	0.298746	3.78318	IFN-y			77	-1.64455	-2.16826	IFN-y
					78	-1.9794	0.786629	IFN-y			78	-0.11084	1.79959	IFN-y			78	-1.61185	-2.95498	IFN-y			78	0.7132	2.7802	IFN-y			78	0.19282	-1.88551	IFN-y
					79	-2.72772	1.83696	IFN-y			79	-2.49965	2.26518	IFN-y			79	-1.30173	-2.58865	IFN-y			79	0.80681	3.52395	IFN-y			79	-2.40448	-2.15631	IFN-y
					80	-2.18122	2.44876	IFN-y			80	-0.840648	1.4092	IFN-y			80	-2.23389	-2.57942	IFN-y			80	-0.380041	2.83531	IFN-y			80	-2.21846	-0.701488	IFN-y
					81	-2.26695	2.26139	IFN-y			81	-0.920343	2.23878	IFN-y			81	0.332973	-1.69632	IFN-y			81	0.183555	3.63239	IFN-y			81	-1.00066	-2.81113	IFN-y
					82	-2.52062	2.2424	IFN-y			82	-2.34894	2.51555	IFN-y			82	0.191728	-2.12098	IFN-y			82	0.355607	0.049471	IFN-y			82	-1.76332	-2.35675	IFN-y
					83	-2.45782	-0.237102	IFN-y			83	0.484622	1.4329	IFN-y			83	0.255212	-1.76639	IFN-y			83	0.134726	3.89616	IFN-y			83	-0.338054	-2.86391	IFN-y
					84	-2.60129	0.473927	IFN-y			84	-3.04892	2.08594	IFN-y			84	0.00222378	-1.03485	IFN-y			84	0.709304	3.61596	IFN-y			84	-1.1377	-1.36895	IFN-y
					85	-1.31572	2.16933	IFN-y			85	-1.84046	-0.0573131	IFN-y			85	-2.42191	-1.85544	IFN-y			85	-0.293282	1.94801	IFN-y			85	-1.78432	-0.261535	IFN-y
					86	-2.89547	1.40175	IFN-y			86	-2.18644	1.90772	IFN-y			86	0.00816831	-2.25674	IFN-y			86	0.565954	3.97289	IFN-y			86	-2.2912	-2.44221	IFN-y
					87	-0.790598	0.999683	IFN-y			87	-2.90984	1.26614	IFN-y			87	0.421616	-0.0484328	IFN-y			87	0.660221	-0.466062	IFN-y			87	-0.381546	-0.803828	IFN-y
					88	-1.22135	0.788031	IFN-y			88	0.26209	0.396954	IFN-y			88	-1.2778	-1.38334	IFN-y			88	0.209169	0.872346	IFN-y			88	0.0803984	-1.33467	IFN-y
					89	-1.45346	2.58341	IFN-y			89	-1.96264	-0.0791559	IFN-y			89	-2.11682	-1.60413	IFN-y			89	0.593578	1.93497	IFN-y			89	-1.66922	-0.171012	IFN-y
					90	-1.52772	1.41508	IFN-y			90	-0.676155	1.37877	IFN-y			90	-2.56638	-2.63057	IFN-y			90	-1.33667	0.0977103	IFN-y			90	-2.06018	-0.526783	IFN-y
					91	2.98023	-2.7082	IFN-y			91	-2.71914	1.37929	IFN-y			91	-2.44296	-2.73486	IFN-y			91	-0.178582	1.71563	IFN-y			91	-2.3623	-1.8581	IFN-y
					92	2.11237	-2.39406	Control			92	2.69589	-0.998724	Control			92	1.46581	1.53957	Control			92	-0.180284	-0.730552	Control			92	1.90075	1.33123	Control
					93	0.676176	-0.269453	Control			93	0.82461	0.0521096	Control			93	2.14739	1.57955	Control			93	-0.738923	-0.637446	Control			93	1.77884	0.700198	Control
					94	-0.1199	-0.40875	Control			94	0.737489	0.603985	Control			94	0.598577	0.871377	Control			94	-0.577154	-1.94483	Control			94	1.14459	-0.335191	Control
					95	0.956494	-1.63976	Control			95	0.664519	-0.330777	Control			95	0.869992	0.367675	Control			95	0.217533	-0.982381	Control			95	0.969015	2.69578	Control
					96	1.94818	-1.44627	Control			96	1.377	-0.344537	Control			96	-2.12519	-0.938513	Control			96	-1.32146	0.652517	Control			96	0.558706	2.69159	Control
					97	1.48614	-2.1695	Control			97	-0.0971228	-0.383748	Control			97	-0.167241	1.13696	Control			97	-0.199143	-1.89358	Control			97	0.267337	-0.251516	Control
					98	2.82716	-1.65501	Control			98	2.77234	-2.6398	Control			98	1.91687	1.76385	Control			98	-0.416816	-1.11566	Control			98	1.95208	2.47709	Control
					99	3.31022	-1.46169	Control			99	3.17467	-1.94017	Control			99	0.852003	1.44716	Control			99	-0.98646	-1.84109	Control			99	1.77993	2.76456	Control
					100	0.922394	-1.10338	Control			100	0.303417	-0.899857	Control			100	0.628597	1.79049	Control			100	-0.238629	-0.633944	Control			100	1.14083	-0.0251893	Control
					101	1.77664	-1.78364	Control			101	1.21843	-1.48326	Control			101	0.516887	2.25519	Control			101	-0.106976	-3.14489	Control			101	1.44522	1.44732	Control
					102	3.46602	-1.51809	Control			102	1.63086	-1.2388	Control			102	0.637257	2.76346	Control			102	-1.02002	-2.91334	Control			102	2.36131	2.83893	Control
					103	2.28557	-1.01394	Control			103	2.27809	-1.13935	Control			103	1.51452	1.93735	Control			103	0.398699	-2.56867	Control			103	0.657809	2.93763	Control
					104	3.73434	-1.87795	Control			104	3.289	-1.45462	Control			104	1.61992	3.66824	Control			104	1.01518	-2.67295	Control			104	1.93815	3.24176	Control
					105	1.53163	-0.297521	Control			105	1.12197	-1.64918	Control			105	2.15065	1.29572	Control			105	-0.0526523	-1.77484	Control			105	0.634622	1.31162	Control
					106	-0.910008	2.0098	Control			106	-1.15248	-0.661105	Control			106	0.613276	0.805139	Control			106	-1.18708	-1.49916	Control			106	-0.353316	-1.26456	Control
					107	1.14493	-0.984104	Control			107	0.731767	-1.32657	Control			107	0.0502354	1.64358	Control			107	0.35391	-3.27637	Control			107	0.847328	0.889105	Control
					108	2.06701	-0.318055	Control			108	2.85952	-2.78414	Control			108	1.15699	0.750161	Control			108	0.447811	-1.15266	Control			108	2.20872	1.43242	Control
					109	2.78597	-1.75585	Control			109	1.78494	-2.38844	Control			109	-0.00773149	0.910055	Control			109	0.623042	-2.44838	Control			109	1.08858	2.01654	Control
					110	1.85767	-2.36059	Control			110	2.6215	-2.59807	Control			110	1.04838	2.11821	Control			110	0.902357	-1.60499	Control			110	1.78134	1.36853	Control
