# Supplementary material
Source: Research Square preprint supplement (doi:10.21203/rs.3.rs-9367379/v1)
Supplement: Supplementary file 3 [file 43ff6cba57a70ef736f79f23.xlsx]

## Sheet: CRC_DEPs
Supp.Data7.Tab1 DEPs detected by different methods from CRC data.							Supp.Data7.Tab2 DEPs detected by Top3 methods from CRC data.
protein	dlfq	top3	maxlfq	top1	MCP		protein	dlfq	maxlfq	MCP
O14791	1	1	1	0	0		O14791	1	1	0
O43866	1	0	0	0	0		O43866	1	0	0
O75369	1	0	0	0	1		O75369	1	0	1
O94985	1	1	1	0	0		O94985	1	1	0
P00451	1	1	1	1	1		P00451	1	1	1
P00738	1	1	1	1	1		P00738	1	1	1
P02042	1	1	1	0	1		P02042	1	1	1
P02144	1	0	0	0	1		P02144	1	0	1
P02549	1	0	0	0	1		P02549	1	0	1
P02647	1	0	1	0	0		P02647	1	1	0
P02652	1	0	1	0	1		P02652	1	1	1
P02741	1	1	1	1	1		P02741	1	1	1
P02748	1	0	1	0	0		P02748	1	1	0
P02750	1	1	1	0	0		P02750	1	1	0
P02766	1	0	1	0	0		P02766	1	1	0
P05413	1	0	0	0	1		P05413	1	0	1
P06396	1	1	1	0	0		P06396	1	1	0
P06727	1	1	1	1	1		P06727	1	1	1
P07148	1	1	1	0	1		P07148	1	1	1
P07988	1	0	0	0	1		P07988	1	0	1
P08195	1	1	0	1	0		P08195	1	0	0
P08670	1	0	0	0	1		P08670	1	0	1
P09211	1	0	0	0	0		P09211	1	0	0
P10451	1	1	1	0	1		P10451	1	1	1
P11277	1	1	0	0	1		P11277	1	0	1
P15090	1	1	1	1	1		P15090	1	1	1
P16157	1	0	0	0	1		P16157	1	0	1
P18065	1	0	1	0	1		P18065	1	1	1
P21589	1	0	0	0	1		P21589	1	0	1
P22105	1	1	1	1	0		P22105	1	1	0
P22897	1	0	0	0	0		P22897	1	0	0
P26992	1	0	0	0	1		P26992	1	0	1
P35858	1	0	1	0	0		P35858	1	1	0
P36222	1	0	0	0	1		P36222	1	0	1
P43251	1	0	0	0	0		P43251	1	0	0
P54289	1	1	1	0	1		P54289	1	1	1
P55290	1	1	0	0	1		P55290	1	0	1
P62857	1	0	0	0	1		P62857	1	0	1
P63313	1	0	0	0	1		P63313	1	0	1
P68871	1	1	1	0	1		P68871	1	1	1
P69905	1	1	1	1	1		P69905	1	1	1
P80108	1	0	0	0	1		P80108	1	0	1
Q01995	1	0	0	0	1		Q01995	1	0	1
Q02985	1	0	1	0	0		Q02985	1	1	0
Q06033	1	1	0	0	0		Q06033	1	0	0
Q08830	1	1	1	1	1		Q08830	1	1	1
Q12884	1	0	1	0	0		Q12884	1	1	0
Q12907	1	0	0	0	1		Q12907	1	0	1
Q13231	1	0	0	0	1		Q13231	1	0	1
Q15063	1	0	0	0	1		Q15063	1	0	1
Q15166	1	1	1	0	1		Q15166	1	1	1
Q15485	1	0	0	0	0		Q15485	1	0	0
Q16851	1	0	0	0	1		Q16851	1	0	1
Q6UY14	1	0	0	0	1		Q6UY14	1	0	1
Q86VB7	1	0	0	0	1		Q86VB7	1	0	1
Q8IUL8	1	1	1	1	1		Q8IUL8	1	1	1
Q8WWZ8	1	0	0	0	1		Q8WWZ8	1	0	1
Q96KN2	1	0	0	0	1		Q96KN2	1	0	1
Q9BUN1	1	1	1	1	1		Q9BUN1	1	1	1
Q9BYE9	1	0	0	0	1		Q9BYE9	1	0	1
Q9H8L6	1	0	0	0	0		Q9H8L6	1	0	0
P02768	0	1	0	1	0		P07858	0	1	0
P08519	0	1	0	0	0		P10321	0	1	1
P10321	0	1	1	1	1		P12821	0	1	0
P17936	0	1	0	0	0		P23280	0	1	1
P21333	0	1	0	0	0		P35443	0	1	1
P23280	0	1	1	1	1		P36980	0	1	1
P27487	0	1	0	0	1		P49747	0	1	1
P35443	0	1	1	0	1		P69892	0	1	1
P36980	0	1	1	1	1		Q8IUK5	0	1	0
P69892	0	1	1	1	1		Q8TDY8	0	1	1
Q8IUK5	0	1	1	1	0		Q8WUA8	0	1	0
Q8TDY8	0	1	1	1	1		O60888	0	0	1
Q8WUA8	0	1	1	0	0		P0DJI8	0	0	1
P07858	0	0	1	0	0		P0DJI9	0	0	1
P12821	0	0	1	0	0		P27487	0	0	1
P49747	0	0	1	0	1		P30086	0	0	1
O60888	0	0	0	0	1		P32754	0	0	1
P0DJI8	0	0	0	0	1		P55056	0	0	1
P0DJI9	0	0	0	0	1		P55268	0	0	1
P30086	0	0	0	0	1		P62328	0	0	1
P32754	0	0	0	0	1		P69891	0	0	1
P55056	0	0	0	0	1		Q00013	0	0	1
P55268	0	0	0	0	1		Q02413	0	0	1
P62328	0	0	0	0	1		Q13508	0	0	1
P69891	0	0	0	0	1		Q15323	0	0	1
Q00013	0	0	0	0	1		Q8IWV2	0	0	1
Q02413	0	0	0	0	1		Q8NBJ4	0	0	1
Q13508	0	0	0	0	1		Q92496	0	0	1
Q15323	0	0	0	0	1		Q9BXR6	0	0	1
Q8IWV2	0	0	0	0	1		Q9UEW3	0	0	1
Q8NBJ4	0	0	0	0	1		Q9Y279	0	0	1
Q92496	0	0	0	0	1
Q9BXR6	0	0	0	0	1
Q9UEW3	0	0	0	0	1
Q9Y279	0	0	0	0	1

## Sheet: CPTAC_survival_data
Supp.Data7.Tab3 The CPTAC data and corresponding clinical data used for survival analysis with those MCP uniquely identified DEPs from the CRC data.
Sample_ID	ARF5	M6PR	ESRRA	FKBP4	NDUFAF7	FUCA2	CFTR	CYP51A1	USP28	TMEM176A	HSPB6	PDK4	USH1C	RALA	BAIAP2L1	DVL2	RPAP3	IFRD1	SKAP2	TRAPPC6A	SPATA20	CEACAM7	RHBDD2	TSR3	OSBPL7	NDUFAB1	YBX2	IL32	PGLYRP1	STARD3NL	CD9	CD74	RPS20	FAM76A	MGST1	CPA1	RANBP9	CD4	TSPAN9	QPCTL	PPP5C	NME1	UBR7	MAP4K5	INMT	ERCC1	PTBP1	GPRC5A	HEBP1
01CO005	-0.203037	-0.223341	-0.283633	-0.612614	0.514855	-0.824026	NA	0.0453833	NA	-0.248511	-2.40274	NA	-0.202387	0.141186	0.220135	NA	0.127151	NA	0.0915681	NA	0.157922	-1.2593	-0.0163591	NA	-0.346289	-0.0457009	0.334947	NA	-0.277977	NA	-0.823523	0.0633645	0.279454	0.0279153	-0.319031	-0.619138	-0.0759676	0.00246712	0.0224797	-0.171836	-0.277314	0.481318	0.415472	-0.0390225	NA	0.226418	0.396759	-1.14933	-0.647916
01CO006	0.188931	0.54462	NA	-0.57164	-0.209734	0.79909	NA	-0.338493	-0.0425671	NA	-1.65493	-0.310779	0.206631	0.0828062	0.0159893	-0.139537	0.140261	-1.05756	0.255525	0.757452	-1.20247	-1.19349	-0.0341244	NA	0.480608	0.168759	-0.905066	-0.753207	0.0322988	NA	-0.760451	0.482061	0.435382	NA	-0.630429	NA	-0.101578	0.0656308	-0.0323262	0.115968	-0.255321	-0.911608	-0.133028	NA	NA	-0.414501	0.0782328	0.402	-0.0924103
01CO008	0.40481	-0.246523	-0.0539396	0.252995	0.190861	0.101419	-0.502876	0.62706	0.0898155	-0.106411	-1.90462	NA	-0.00303836	0.343111	0.641569	0.0672813	0.316633	NA	-0.708745	NA	-0.129044	0.0269377	-0.0108384	-0.644317	NA	0.487077	0.129025	NA	-1.06473	NA	0.0602707	-0.240968	-0.272737	NA	0.994617	-0.858576	-0.256354	-0.187339	-0.676475	0.0424788	0.0359351	0.416367	0.0477026	0.0489791	NA	NA	0.225075	0.110677	0.884201
01CO013	-0.276982	-0.017659	NA	-0.455055	0.500686	-0.350366	NA	0.263168	0.68383	NA	-1.9913	NA	0.0045191	0.079645	0.17378	0.0404961	0.431131	NA	0.250034	0.123472	-0.796531	-0.101627	-0.129257	NA	NA	-0.0308706	NA	-0.265193	0.248391	NA	-0.784406	0.226898	0.645054	NA	-0.573929	NA	0.232612	0.420008	-0.602678	-0.590702	-0.52279	-1.47008	-0.38105	NA	NA	NA	0.585525	0.835809	-0.645419
01CO014	-0.160155	0.100022	0.259696	0.341345	-0.310265	0.0954611	-0.745855	1.00661	NA	NA	-2.95953	NA	0.152965	-0.104614	0.556101	-0.343783	0.325774	NA	-0.236009	0.183067	-0.745379	-0.0789127	0.597416	NA	-0.26855	0.0570741	NA	NA	0.123846	-0.131379	-0.654163	-0.192971	0.261366	NA	0.81721	NA	0.239677	-0.977222	-0.605455	0.242688	-0.126014	0.332432	-0.284929	-0.209091	NA	0.250177	0.263286	-0.10482	-0.497866
01CO015	0.143593	-0.0292788	NA	0.0832728	-0.0852797	0.355605	NA	0.492729	-0.0520003	NA	-2.27864	-0.843973	0.241897	0.130239	0.269104	-0.0214477	0.0210603	-0.930262	0.393887	NA	-0.141402	-1.05004	0.101483	NA	NA	0.348731	NA	NA	-0.297644	-0.160106	-0.791425	-0.0765049	0.420515	-0.553144	-0.621343	NA	-0.0853103	0.185118	0.377927	-0.260195	-0.165963	0.205129	0.202008	0.376817	NA	-0.894053	0.375955	-0.582846	-0.0154269
01CO019	0.257853	-0.0526141	0.232707	0.782576	-0.223481	0.492609	0.920731	0.383377	-0.319816	0.319223	-0.599051	NA	0.315307	0.0848906	0.44772	-0.382061	0.091964	NA	0.137645	NA	-0.15323	-0.336134	0.266621	0.0896822	NA	0.544894	-0.410939	NA	-0.481548	NA	-0.126433	-1.05318	0.0557983	NA	-0.0478051	-0.591607	-0.113824	-0.40861	0.106934	-0.103845	0.254003	0.515996	0.256494	-0.42945	NA	NA	0.189082	-0.92439	-0.436791
01CO022	-0.0227743	0.484297	NA	0.38817	0.0232226	-0.0156313	-0.263164	0.682877	NA	-0.144384	-1.72485	-1.09502	0.0609576	-0.0781008	0.0516968	NA	0.182506	NA	0.563689	NA	-0.420311	-1.4573	0.59575	NA	NA	-0.150182	-0.33031	NA	1.16036	NA	-0.560745	-0.658891	0.315529	NA	-0.126441	2.83819	0.272113	-1.13265	-0.420906	0.407773	0.181187	0.314504	0.883797	-0.301076	NA	NA	0.0154687	-0.677882	-1.19985
05CO002	0.442823	-0.237763	-0.553215	0.0533652	0.215337	0.0255311	0.382204	0.304441	-0.396029	0.374383	-2.67978	NA	0.247171	0.239671	0.546606	-0.125966	0.276241	NA	-0.135066	NA	-0.231565	-0.999272	0.0526052	0.02531	NA	0.361226	-0.891445	NA	-0.193823	NA	-0.287751	-0.00347356	0.389964	NA	0.193116	-0.860086	-0.0466658	-0.0675512	0.422109	-0.303385	-0.0431469	-0.0550315	-0.0977945	0.0673247	NA	NA	0.541044	0.419632	0.106502
05CO003	0.125417	0.0474687	NA	-0.225503	-0.4272	-0.404877	NA	-0.724815	-0.0466435	NA	-2.27653	0.0721276	0.0952974	0.322137	0.195603	0.391859	0.00615909	-0.738178	2.26708	NA	-0.344901	-0.146039	-0.152081	NA	NA	-0.758621	NA	NA	1.90999	-0.0439926	-0.899482	-0.523243	0.195638	0.124273	0.18724	NA	0.295118	-0.458739	-0.298379	0.486637	-0.0133486	-1.45404	-0.33439	0.529382	NA	0.692217	0.0147283	0.242978	-0.302883
05CO006	-0.180616	0.440725	NA	0.447916	-0.537869	-1.13695	NA	-0.326576	0.433969	NA	-2.03065	-1.56156	-0.847234	-0.0826436	-0.0269506	-0.0872803	-0.0248889	-0.688942	0.331153	NA	-0.185146	-1.78594	1.01895	NA	NA	-0.56458	NA	NA	0.265803	0.0244852	-0.366876	0.3607	0.311094	0.858461	-0.591331	NA	0.452048	-0.193109	-0.0610716	0.407814	0.133007	-0.563291	0.128085	0.5439	NA	-0.214362	0.201579	0.573341	-0.48444
05CO011	0.189079	-0.393678	NA	0.451704	1.20341	0.227439	0.475965	-0.494993	NA	NA	-1.271	-0.872784	-0.0741231	0.411233	-0.324391	-0.204078	0.245288	-1.60978	0.16153	NA	-0.14976	-0.741655	-1.04465	NA	-0.00319121	-0.0965362	-0.320627	NA	NA	NA	-0.72171	-0.667651	0.255518	NA	-0.525445	NA	0.297799	-0.858946	-0.19286	0.273483	0.660114	0.916214	0.0364928	1.05544	NA	NA	-0.0516297	0.204573	0.231983
05CO015	0.1816	0.115299	NA	0.470448	-0.0869783	-0.601428	-0.310088	-0.171221	NA	0.0900631	-1.38152	-0.494712	-0.613589	-0.000131946	0.290169	NA	0.147294	NA	0.659518	NA	-0.0986354	-0.768859	0.264641	NA	NA	-0.22101	-0.425657	NA	0.295367	NA	-0.513278	-0.0723365	0.211259	NA	-0.529433	0.925595	0.176656	-0.134029	-0.0922746	0.17268	0.105553	0.119562	0.14843	0.10031	NA	NA	0.0457743	0.607771	-0.0212138
05CO020	-0.462317	0.0505989	0.165148	-0.536177	-0.0638636	-0.404277	0.408309	0.359172	NA	NA	-3.05503	NA	0.247513	-0.149883	-0.0227845	-0.206501	0.0823568	NA	0.239221	0.0581427	0.149736	-0.303203	0.0575764	NA	0.100453	-0.0391895	NA	NA	0.87719	0.110593	-0.34526	-0.318748	0.358565	NA	0.00916826	NA	0.145947	-0.105486	-0.121818	0.156455	-0.553519	-0.13443	-0.453039	-0.21903	NA	-0.0994012	0.123599	0.228441	-0.636987
05CO026	-0.331558	0.179331	0.0923975	-0.288036	0.0295799	0.124643	NA	0.54635	NA	NA	-1.98134	NA	0.244885	-0.280052	-0.64719	-0.496659	0.699151	NA	-0.193897	-0.00522347	0.152852	-2.0643	-0.397383	NA	-0.40028	0.117774	NA	NA	-0.0605667	-0.0303848	-0.355194	-0.0641748	0.483043	NA	0.162911	NA	0.137884	-0.0442338	-0.445106	-0.331391	-0.0173416	0.31671	0.0238993	-0.751523	NA	NA	0.578921	0.156632	-0.0712064
05CO028	0.536721	0.0532947	-0.153863	0.183796	0.00941887	0.0707001	NA	-0.00302795	NA	-0.270845	-2.70887	NA	0.500001	0.399415	0.374709	NA	0.546426	NA	-0.0417195	NA	-0.240231	-1.62145	0.411693	NA	-0.466866	0.182413	0.148908	NA	-1.28805	NA	0.21719	-0.371939	0.592323	-0.900651	0.0175215	-0.694212	-0.298963	-0.0101457	-0.56698	0.0808721	0.136894	0.0223588	0.641265	-0.457743	NA	0.264294	0.496488	-0.329797	0.192171
05CO029	-0.00920713	-0.252099	0.0543459	-0.235377	0.206818	-0.017287	-1.82525	-0.230717	NA	-0.188512	-1.71003	NA	0.419655	0.0209179	0.288149	NA	0.206529	NA	0.0539607	NA	NA	1.39297	-0.562587	NA	-0.178506	0.50624	-0.486561	NA	-0.893934	-0.0809343	-0.00158968	0.106993	0.125895	NA	0.0769709	NA	-0.171255	0.329442	-0.171808	0.474746	0.157698	0.924462	0.133051	-0.408743	-0.623284	NA	0.326486	-0.854408	0.317227
05CO032	-0.491969	0.289445	-0.145212	-0.122406	-0.0916916	-0.210535	-0.523759	0.477488	NA	NA	-2.67051	NA	0.0460805	-0.241446	-0.255337	-0.123837	0.269505	NA	0.239013	0.211589	-0.257769	-0.946093	0.247134	NA	-0.025842	-0.194668	NA	NA	-0.2151	0.126007	-0.895691	0.327431	0.342845	NA	-0.273057	NA	0.0767821	0.3162	-0.261163	0.178532	-0.220449	-0.193787	-0.0291132	-0.0492565	NA	0.0754415	0.260872	-0.963285	-0.562634
05CO033	-0.227914	0.325405	NA	0.120535	-0.155446	-0.138996	-0.75102	0.407926	NA	NA	-0.786821	-0.307021	-0.532441	-0.222865	-0.264611	0.506498	-0.130546	-0.221901	0.687465	NA	0.154903	-0.991435	-0.185132	-1.0854	0.292041	-0.440416	NA	NA	0.304436	0.152502	-0.275767	0.323021	0.0551599	0.0673492	-0.565059	0.160876	0.363446	NA	0.079647	0.245545	-0.067277	-0.314689	-0.0357534	0.230595	NA	NA	-0.081579	1.96699	0.0359881
05CO034	-0.171341	0.53219	NA	0.363388	0.488967	-0.334887	-0.625654	-0.721181	NA	0.340784	-1.43676	NA	-0.0220769	0.242743	0.164661	-0.0918532	0.21802	NA	-0.322892	NA	-0.132702	-2.03001	0.50927	0.392169	NA	0.615877	-0.369273	-0.574273	-0.425167	NA	0.950985	-0.796055	0.325792	NA	-0.98262	NA	0.114016	0.134382	1.20926	-0.308937	0.377382	0.416706	-0.161361	-0.0937421	NA	0.479342	0.163696	1.73099	0.0148565
05CO035	0.335445	0.0110099	NA	0.212117	0.360928	0.527045	NA	-0.0667852	-0.00926162	0.118814	-1.98717	-0.533147	0.0491422	0.171102	0.532412	NA	0.0327873	NA	-0.246768	NA	-0.195426	-0.271758	0.334656	NA	NA	0.33509	-0.270636	NA	-0.887604	NA	0.0412725	-0.586291	0.0838323	0.426697	0.0187737	-0.741225	-0.246587	-0.141219	0.106602	-0.114489	-0.0253674	0.52244	0.00989179	NA	NA	NA	0.189232	0.810437	0.0255079
05CO037	-0.585496	0.196168	-0.0472189	-0.653435	-0.215313	-0.429565	-0.669827	0.182787	NA	NA	-3.23984	NA	-0.590978	-0.0319521	-0.420606	-0.0784556	-0.0500618	NA	0.144741	-0.492905	0.275825	-2.17284	0.00937823	NA	-0.584337	0.280614	NA	NA	0.559611	-0.0513237	0.0206765	-0.784792	0.249212	NA	-0.777245	NA	0.282206	-0.27522	0.296901	0.676342	-0.382633	-0.487361	-0.62585	0.128053	NA	-0.0886078	0.219128	-0.0324774	-0.795323
05CO039	-0.17988	0.0441008	NA	0.514703	-0.106157	-0.112152	-2.3745	0.59513	NA	-0.0910125	-2.72373	NA	-0.00335148	0.149091	-0.0545919	-0.205186	0.335533	NA	-0.0157733	NA	-0.398962	-0.773376	0.406609	0.0599296	NA	0.0100458	-0.372843	-0.102326	0.217694	NA	-0.769368	1.04093	0.390465	NA	-0.137238	NA	0.0542658	0.0253259	-0.367602	-0.0941454	-0.0160846	0.179167	0.211149	-0.49894	NA	0.0379606	0.324721	-0.0373234	-0.519286
05CO041	-0.008726	0.0806841	NA	0.275134	-0.0365623	-0.0656249	-2.7085	0.283073	NA	-0.142196	-2.73168	NA	-0.79317	0.119311	0.29552	-0.0632123	0.275974	NA	0.467742	NA	0.437892	-1.58626	0.604761	0.444047	NA	-0.183114	-0.564507	0.953457	-0.159849	NA	-0.689027	0.565793	0.160382	NA	-0.467234	NA	0.18714	0.345061	0.273397	-0.129541	0.135719	0.0868772	0.731817	-0.386792	NA	0.315886	0.168451	-0.0551739	-0.166981
05CO044	0.482738	0.408475	NA	0.260387	0.362242	-0.0941345	NA	-0.25657	-0.0869805	0.700403	-1.78771	-0.734142	-0.617213	0.117924	0.57724	NA	0.040427	NA	1.28978	NA	-0.129335	-0.0334991	0.346545	NA	NA	-0.423629	-0.237613	NA	2.23539	NA	-0.172896	-0.839117	0.00524363	-0.198431	-0.237123	-0.811652	0.542446	-0.144914	0.412684	0.341579	0.0038221	-0.530149	-0.171795	NA	NA	NA	0.137552	1.44578	0.0664828
05CO045	0.414782	0.208316	NA	0.515444	0.258621	-0.209444	NA	0.185028	-0.039384	-0.288102	-1.45926	-0.561291	0.187933	0.0475513	0.757427	NA	0.102791	NA	0.154989	NA	-0.0972833	-0.515596	0.196088	NA	NA	0.181457	-0.0362667	NA	-0.496577	NA	-0.483281	0.887486	0.0641703	0.0666519	0.0658865	0.217663	-0.0894776	0.234709	0.0802884	-0.13522	-0.0154021	0.296261	0.154908	NA	NA	NA	0.0684416	0.382956	0.0871403
05CO047	0.563214	0.513343	NA	0.205814	-0.259147	0.176478	0.28949	0.78349	NA	0.235928	-1.90024	-0.498237	0.912478	0.480008	1.21433	NA	0.688153	NA	-0.265229	NA	0.238984	-1.92259	1.24114	NA	NA	1.00152	-1.14285	NA	-1.04183	NA	-0.269067	-0.738326	0.445746	NA	0.18219	-1.10107	-0.272525	-0.936402	-0.257684	-0.122647	-0.34927	0.091007	-0.197726	0.155603	NA	NA	0.388565	-0.746414	-0.525409
05CO048	-0.463251	-0.0787581	NA	0.0683563	0.228188	-0.122385	NA	0.497744	NA	-0.53297	-1.67861	NA	-0.56271	0.286472	0.571017	-0.364655	0.0779515	NA	0.20048	-0.189861	-0.402688	-1.48996	0.12335	NA	NA	-0.160401	NA	NA	1.11539	NA	-0.149286	-0.247069	0.389013	NA	0.43564	0.3609	0.202615	0.259062	-0.310647	-0.139794	-0.408411	-0.629488	-0.42377	0.0420923	NA	NA	0.220892	1.84026	-0.421446
05CO049	-0.443311	-0.180941	0.223399	-0.559191	0.0837522	-0.268546	0.216463	0.282258	NA	NA	-2.92661	NA	0.294837	0.0593224	-0.129975	-0.113088	0.137502	NA	-0.271626	-0.275865	0.223576	0.66291	0.0734878	NA	0.067786	0.08927	NA	NA	-0.406312	0.0894816	-0.129359	0.527392	0.24878	NA	0.665898	NA	-0.0626408	0.431309	-0.294244	0.27258	-0.679981	-0.19307	-0.572129	-0.215217	NA	0.041315	0.101782	-0.31978	-0.370241
05CO050	-0.0586014	0.0858617	NA	0.585	-0.0496231	-0.180143	NA	-0.135699	0.228241	NA	-1.72071	NA	0.376695	-0.129829	0.133199	0.0373979	0.444145	NA	0.279658	0.600403	-0.796596	-1.35642	0.259306	NA	NA	0.244836	NA	0.0282005	0.425031	NA	-0.63376	-0.82185	0.458353	NA	-0.583255	NA	0.435861	-0.130865	-0.728026	0.347298	0.11724	-0.116069	0.536836	NA	NA	NA	0.371998	-0.78555	-0.418188
05CO053	-0.0452805	0.348128	NA	0.345349	0.100356	-0.203119	NA	0.064115	-0.201342	-0.30624	-2.62286	-0.9664	0.630416	0.0834983	-0.121671	NA	0.474103	NA	-0.268605	NA	-0.126693	-1.32437	0.579472	NA	NA	0.176465	0.279562	NA	-0.3533	NA	-0.429484	0.077574	0.566512	-0.144311	0.293743	-0.669338	-0.100524	-0.357261	-0.200386	-0.236651	-0.140138	-0.153377	0.0730986	NA	NA	NA	0.25229	0.0499984	-0.118559
05CO054	0.458212	-0.00124209	0.197481	0.431387	-0.0634528	0.764507	-2.58468	0.722782	NA	-0.0962502	-2.05258	NA	0.581265	0.145597	0.502204	NA	0.509707	NA	-0.095416	NA	NA	0.119958	0.20354	NA	-0.37649	0.234409	1.21759	NA	-1.36027	0.278208	-0.283058	0.509247	0.482473	NA	0.0610228	NA	-0.105171	-0.00173353	-0.445231	0.170294	0.00428249	0.191065	0.378225	-0.0789156	-0.573036	NA	0.361404	-0.783685	0.203649
06CO001	0.637911	0.118253	NA	-0.00339695	0.930444	-0.0705709	NA	0.212027	-0.147187	NA	-1.96257	NA	-0.238496	0.823683	0.228239	-0.800403	0.174607	NA	-0.0132734	0.0926829	0.379743	-1.04165	-0.0469874	NA	NA	0.683862	NA	-0.262565	-0.108195	NA	-0.542312	-0.467984	0.284799	NA	-0.228754	NA	-0.0770262	0.023563	0.113294	-0.198889	-0.354369	0.711932	-0.0527142	NA	NA	NA	0.314197	0.136222	0.370624
06CO002	-0.246827	0.121239	NA	-0.267404	-0.0401825	0.090188	-1.53957	-0.0312492	NA	NA	-1.20004	-0.783128	0.0388359	0.127207	-0.231681	-0.0733516	0.0430787	0.00791566	-0.0259363	NA	0.502643	-0.28414	-0.939404	-0.866158	-0.171087	0.172695	NA	NA	-1.34418	-0.359799	-0.354614	-0.355075	0.100247	-0.224349	-0.156893	-0.753768	-0.138236	NA	0.381996	0.266033	-0.102885	-0.0576479	-0.574281	0.584038	NA	NA	0.102137	1.38632	0.359442
09CO005	0.0330516	-0.190062	-0.671227	0.0350544	-0.232065	-0.128593	-0.00921367	0.414158	-0.579093	0.167511	-1.96963	NA	0.0748668	-0.13988	-0.270431	-0.260638	0.161185	NA	0.166696	NA	-0.195008	-1.82191	0.222167	-0.100783	NA	0.162619	-1.17822	NA	-0.361312	NA	-0.0985499	-0.401759	0.188825	NA	-0.538203	-0.42825	-0.0399427	-0.228419	1.02761	-0.129822	-0.151978	0.0831072	0.0743275	0.0821713	NA	NA	0.387982	-0.845575	-0.285691
09CO006	0.69993	-0.204673	NA	0.0349454	0.25608	-0.167167	NA	1.06904	-0.0272192	NA	-2.12676	0.727814	0.246765	0.314778	0.429252	0.398816	0.2215	-0.840643	-0.13702	NA	0.0390691	3.53649e-05	0.0762684	NA	NA	0.103922	NA	NA	-0.103464	0.0729781	-0.406259	-0.0789905	0.302146	0.244564	0.485848	NA	-0.150418	0.235735	-0.27295	0.245487	-0.145468	-0.166453	-0.0628434	0.199724	NA	-0.0206279	0.092301	-0.569781	0.310263
09CO008	-0.582665	0.0176422	NA	-0.494129	0.0893874	-0.599909	NA	0.18477	NA	-0.180243	-2.15552	NA	-0.610587	0.121014	-0.602997	-0.673246	0.231886	NA	0.200484	-0.0751919	0.273444	-1.24064	-0.0300574	NA	NA	0.213313	NA	NA	0.776788	NA	-0.349842	-0.101646	0.27021	NA	-0.290778	-1.58634	0.10189	0.55791	0.632005	-0.0631122	-0.667742	-0.634726	-0.365765	0.130654	NA	NA	0.45646	-0.617052	-1.2791
09CO011	0.40375	-0.154425	NA	-0.156666	0.439804	0.205591	NA	0.434359	NA	-0.0520987	-2.27527	NA	0.506164	0.00917436	0.430069	NA	0.363207	NA	-0.0302119	NA	-0.272677	-1.66184	0.416507	NA	NA	0.398271	0.173615	NA	-0.241786	NA	-0.849791	0.505815	0.118754	NA	-0.686873	NA	-0.0326589	-0.0622186	-0.375272	-0.085071	0.13617	-0.0397957	0.0846416	-0.21267	NA	NA	0.312856	-1.33394	-0.406616
09CO013	1.28361	0.0834977	NA	0.506998	0.450639	0.375785	NA	0.189082	0.511807	NA	-1.53558	-0.774227	0.51496	0.28115	1.2775	-0.683693	-0.0397374	0.965935	-0.114225	0.365841	-0.0799603	-1.63042	0.546067	NA	-0.313299	0.030272	-0.577371	-0.0118866	0.12102	NA	0.331682	-0.323233	0.433814	NA	-0.302151	NA	-0.0684039	-0.581828	-0.671666	-0.0336193	0.18657	-0.213594	0.675394	NA	NA	0.25586	0.0621053	1.46279	0.162866
09CO014	-0.686781	0.240927	NA	-0.571314	0.21399	0.0194247	NA	0.18928	NA	NA	-2.03641	NA	0.184614	0.273415	-0.195003	NA	0.333689	NA	NA	NA	-0.165706	-1.16419	-0.28744	NA	NA	0.431335	0.0225637	NA	-0.0494264	NA	-0.292301	0.817873	0.185332	NA	0.238428	-1.10413	0.281036	0.330637	0.101975	0.115134	-0.674113	-0.518021	-0.807896	-0.235024	NA	NA	0.354116	-1.20899	-0.391174
09CO015	-0.47613	-0.1493	-1.08172	-0.0708534	0.339203	-0.151434	NA	0.569967	NA	0.334572	-2.25806	NA	-0.208579	0.244113	0.223167	NA	0.240214	NA	0.592581	NA	-0.651764	-0.0149424	0.471303	NA	-0.493311	0.251814	-0.181154	NA	-0.21005	NA	-0.588515	0.148417	0.39425	0.617714	-0.015185	0.153197	-0.0120897	-0.00886361	0.149036	0.0320322	-0.367949	0.00479335	0.0837764	0.0877855	NA	0.194478	0.213598	-0.385515	-0.278235
09CO018	0.145906	0.106499	NA	0.158277	-0.0913697	0.248506	NA	0.562399	NA	-0.733809	-2.02587	NA	0.194561	0.681521	0.457755	NA	0.703925	NA	0.068457	NA	-1.03542	-1.19097	-0.0569539	NA	NA	0.183855	-0.748688	NA	0.797642	NA	0.193583	-0.145701	0.121076	NA	0.952824	NA	-0.079614	-0.134194	-0.209034	-0.0500524	0.104013	0.614248	0.485148	1.07333	NA	NA	0.0210775	1.14247	0.331767
09CO019	0.026674	0.435202	NA	-0.0462053	0.128343	-0.312089	NA	-0.246531	-0.0411561	-0.257608	-1.73014	NA	-0.201429	-0.0545165	-0.217525	NA	-0.0237571	NA	NA	NA	0.0491479	-1.16551	0.0471024	NA	NA	-0.151009	NA	NA	-0.218297	NA	-0.265003	0.368462	0.247706	NA	0.36576	NA	-0.142312	-0.099105	-0.00545257	0.149029	0.272214	0.816638	0.467059	NA	NA	NA	-0.140859	0.548156	0.14217
09CO022	0.018283	0.211629	NA	0.532609	0.3586	0.115556	1.22205	0.268817	NA	NA	-2.2947	-1.31592	0.351929	0.0718731	0.636097	-0.717483	0.246011	NA	-0.256908	0.646407	-0.415005	-0.566383	-0.00232224	NA	-0.338337	0.275069	NA	NA	NA	NA	-0.124611	0.345628	0.236343	NA	0.368341	NA	-0.0838869	NA	-0.212947	0.0585136	-0.121608	0.407769	-0.00415126	-0.0853785	NA	NA	0.161219	0.753032	0.165351
11CO005	0.466878	-0.153497	NA	0.0372744	-0.197089	0.137992	-0.584355	-0.700448	NA	NA	-0.44512	-1.56836	0.177081	-1.05423	0.496204	0.463198	-0.0257915	NA	0.197744	-0.533798	-0.395838	-0.120409	0.554567	NA	-0.0514428	-0.681274	NA	NA	NA	NA	-0.252653	0.189324	0.0603569	NA	-0.698363	NA	-0.531529	NA	0.0624169	0.199979	0.334638	0.874819	-0.0829069	0.766989	NA	NA	-0.272946	-0.0997937	0.320646
11CO007	0.214642	0.165239	-0.391362	0.102341	0.31146	0.141344	NA	0.000701083	2.13294	0.165716	-1.02512	-0.981263	-0.404854	-0.24675	0.0567886	NA	-0.00208687	2.22585	0.588935	NA	-0.0658801	-0.154848	-0.381197	-0.353823	NA	-0.666713	NA	NA	0.402784	NA	-0.915314	0.751358	0.100869	NA	-0.346467	-0.437636	0.14582	0.147899	0.215235	0.880429	0.284492	0.698014	-0.327688	-0.344576	NA	NA	-0.260677	0.489884	0.123042
11CO008	0.318333	0.348834	NA	0.349415	0.245706	0.450772	-0.0295166	-0.367803	-0.659158	0.79224	-0.945095	-0.26667	-0.185665	0.275278	0.173092	0.730064	0.301282	0.708377	0.527795	NA	-0.211236	-1.65045	0.394161	NA	0.231809	-0.45429	0.299209	NA	0.254735	NA	-0.132301	-0.337071	-0.0119223	NA	0.239434	-0.305082	-0.123084	-0.455969	0.448376	-1.00947	0.0284871	0.652954	-0.204804	NA	NA	NA	-0.179995	1.76901	0.404948
11CO010	0.356051	-0.375319	NA	-0.287162	0.301812	0.3306	0.40109	-0.479791	NA	NA	-0.964499	-0.816758	0.0736542	0.436266	0.326426	-0.121717	0.0271122	NA	0.0627249	-0.661957	-0.18342	-1.24544	-0.272497	NA	-0.189606	0.015867	NA	NA	NA	NA	0.120427	0.554619	-0.12519	NA	-1.14208	NA	-0.137989	NA	0.0650493	-0.0299566	0.120138	0.815124	0.102021	0.132753	NA	NA	-0.0947156	0.346829	-0.0147271
11CO018	-0.0937982	0.0303892	NA	0.257265	-0.204182	0.0122408	NA	-0.724756	-0.10884	-0.298836	-1.39958	NA	-0.398377	0.377952	0.413095	NA	-0.229722	NA	NA	NA	-0.206032	-3.00385	-0.35884	NA	NA	-0.166274	NA	NA	-0.320233	NA	-0.0981006	0.730856	-0.00965011	NA	-0.19818	NA	0.111777	0.305869	-0.255357	0.331794	0.105287	0.130724	0.238131	NA	NA	NA	0.120962	0.152026	0.101271
11CO019	0.184606	0.174495	NA	0.243393	0.435272	-0.468598	-0.423465	0.113978	-0.308734	-0.535313	-1.84041	-0.991609	-0.311073	0.0920119	0.192861	0.0542092	0.106204	-0.0354575	0.0145281	NA	-0.282846	-1.99893	0.406582	NA	-0.246598	0.0478296	-0.844672	NA	-0.26149	NA	0.0239171	-0.0431879	0.286667	NA	-0.392918	-0.528053	-0.171902	-0.275117	0.406618	0.197201	-0.0538477	0.191264	-0.500946	NA	NA	NA	0.0957959	0.892176	0.217892
11CO020	-0.0639154	0.441254	NA	0.738168	-0.0625717	0.0675817	-1.47267	0.0348761	NA	-0.28855	-1.93806	NA	-0.0544505	0.230824	0.0454276	-0.103843	-0.0264534	NA	-0.117107	NA	-0.0966004	-1.51094	-0.167586	-0.308559	NA	0.0576764	-0.452764	-0.619641	-0.216294	NA	0.51043	-0.350545	0.055924	NA	-0.255741	NA	0.169268	-0.021665	0.610587	-0.0420353	0.160626	0.538563	0.00604793	-0.19528	NA	0.209411	0.29894	-0.339329	-0.2787
11CO021	0.381616	0.697247	NA	0.280744	-0.187656	0.0581465	NA	0.82958	NA	-0.167116	-1.6806	NA	-0.0102654	0.112491	0.921046	NA	0.0932656	NA	0.279901	NA	-0.429659	-2.70988	1.14973	NA	NA	0.41936	0.19555	NA	-0.139122	NA	0.79007	-0.112747	0.193508	NA	0.763856	NA	0.0920056	0.0231699	0.000995904	-0.0511213	0.325046	-0.0098179	-0.158719	0.907377	NA	NA	0.00759839	2.08794	0.418055
11CO022	0.141381	-0.0381816	-0.194866	0.103559	-0.0485944	-0.250488	0.273501	-0.0905659	NA	0.399084	-0.689073	NA	-0.0989155	0.047613	-0.164706	NA	0.00464643	NA	-0.0462466	NA	NA	-1.05967	-0.23564	NA	0.227877	-0.0213719	0.115235	NA	0.153997	-0.0831407	-0.100136	-0.298495	0.0597126	NA	-0.102472	NA	-0.0995474	-0.020669	0.0246592	0.0615987	-0.0315631	0.17746	0.167793	0.366686	0.459014	NA	0.0513238	0.308084	-0.193759
11CO027	0.269727	0.0896	-0.173525	0.218469	-0.0559983	-0.393266	NA	0.390721	1.09506	-0.426804	-0.32891	-0.653299	0.0430195	0.127871	0.602353	NA	0.2964	1.13764	-0.520282	NA	-0.431784	-0.484533	0.00692656	-0.128012	NA	-0.0652485	NA	NA	-0.633885	NA	-0.205655	-0.118765	0.233125	NA	0.599782	-0.538062	-0.0133635	-0.267239	0.260636	0.066524	0.127108	0.694369	-0.496367	-0.205741	NA	NA	0.0772153	-0.269191	0.0950393
11CO030	0.390678	-0.463467	0.111553	0.417172	0.0533475	0.394626	NA	-0.129886	NA	NA	-1.18514	NA	-0.294422	0.229367	-0.0103498	-0.0238038	0.231985	NA	0.217969	-0.576544	-0.330206	-0.993375	0.123235	NA	-0.169052	-0.0569446	NA	NA	0.314525	0.344278	-0.209044	-0.323183	-0.132762	NA	-0.0103706	NA	0.0549344	-0.245187	0.105806	0.0149138	-0.0500394	0.353135	0.45134	0.00773815	NA	NA	0.0781034	-0.177682	0.253965
11CO031	0.0705242	0.311518	NA	0.268061	0.199828	0.010473	NA	0.138882	NA	0.839395	-1.61356	-0.825322	-0.45902	-0.512642	0.187521	NA	0.297883	NA	0.793528	NA	0.0392895	-0.759859	-0.360655	NA	NA	-0.972896	NA	2.8408	1.23966	NA	-0.789483	0.0716047	-0.157517	NA	0.422574	NA	-0.00342673	-0.209578	-0.414285	0.507628	0.289281	1.24089	0.465435	NA	NA	NA	-0.204994	-0.12755	-0.0509353
11CO032	0.34112	0.314494	NA	0.384408	0.609965	-0.10285	NA	0.118605	0.416615	-0.0767817	0.00126685	NA	0.00841977	0.153171	0.0875771	NA	0.155931	NA	NA	NA	0.152321	-0.978615	-0.00941726	NA	NA	0.182208	NA	NA	0.437482	NA	-0.262848	0.134819	-0.124416	NA	0.175863	NA	-0.18484	-0.57147	-0.181819	-0.0280194	-0.0381292	-0.00656729	0.203663	NA	NA	NA	-0.245727	0.68405	0.371276
11CO033	0.422448	-0.287053	NA	0.0996213	-0.104893	-0.223	-1.22806	0.0234167	NA	-0.0355298	-2.37041	NA	0.224731	-0.255226	-0.0662425	0.507949	0.273865	NA	0.976327	NA	-0.444125	-0.605824	-0.861128	0.437131	NA	-0.265465	0.346308	0.965714	0.578972	NA	-1.07667	0.642042	-0.435708	NA	0.134567	NA	-0.143237	0.160919	0.255461	0.0513453	0.200386	0.729474	0.45616	-0.391353	NA	-1.50062	-0.607681	-0.783695	0.533274
11CO036	0.0559193	0.148219	0.116741	0.285801	-0.305358	0.275087	-0.632317	-0.522035	-0.130424	0.11968	-2.09036	NA	-0.549848	-0.0540082	-0.314015	0.443003	-0.0267215	NA	0.204112	NA	-0.109961	-1.47771	-0.296636	0.661975	NA	-0.363438	0.273554	NA	1.44341	NA	-0.693241	0.374017	-0.117422	NA	-0.568294	-0.0200142	0.2456	0.227694	0.128356	-0.0669319	0.00923237	0.195222	0.435293	0.551188	NA	NA	-0.0701746	-0.637391	-0.476676
11CO037	-0.14411	-0.225694	NA	-0.200286	-0.0133237	0.117122	NA	-0.434346	NA	-0.159888	0.835017	NA	-0.223875	-0.871609	-0.3361	NA	-0.022837	NA	-0.0250457	NA	0.000786097	0.541215	-0.451584	NA	NA	-0.632249	-0.0856241	NA	-0.343586	NA	-0.135255	0.248011	-0.0933332	NA	-0.257612	NA	-0.104121	-0.0938762	0.370067	0.0504318	0.137258	0.544166	0.504195	0.330645	NA	NA	-0.0638877	0.544476	0.157508
11CO039	0.0551983	0.349334	NA	0.895722	-0.0343099	0.0385068	-0.0468493	0.624777	NA	NA	-0.256576	-1.05232	-0.259004	0.0956846	-0.0706906	-0.255816	0.199436	NA	-0.258036	-1.04503	-0.297612	-0.434705	0.404769	NA	-0.214061	0.187187	NA	NA	NA	NA	0.300294	0.478434	-0.0722136	NA	0.569739	NA	-0.0561978	NA	0.0548139	-0.237895	0.19509	0.489476	0.195927	0.120646	NA	NA	0.205042	0.68076	0.795756
11CO042	0.21947	-0.145455	NA	0.0419227	0.0730962	-0.116201	0.482376	0.092632	NA	0.446755	-1.01932	-0.214908	-0.0357043	0.246441	0.0733744	NA	0.200425	NA	-0.0461838	NA	0.272423	-0.699636	0.239297	NA	NA	0.61584	-0.740435	NA	-0.495715	NA	0.133022	0.288697	0.242241	NA	-1.23642	-1.09738	-0.194367	0.132712	0.0301578	0.186177	-0.251432	-0.414748	-0.187192	0.046128	NA	NA	0.255569	0.44495	0.0684107
11CO043	-0.0144176	0.0833147	NA	-0.193529	0.241547	-0.417465	NA	-0.0571717	-0.355443	0.692062	-1.5699	NA	0.18344	0.182083	0.118387	NA	0.121706	NA	NA	NA	-0.0572097	-2.28743	0.155699	NA	NA	-0.192835	NA	NA	-0.315612	NA	-0.360098	-0.105581	0.254146	NA	0.0297699	NA	0.0627133	0.136346	0.0848431	0.295109	0.128693	0.175277	0.0480399	NA	NA	NA	-0.0287621	-0.115816	0.0524941
11CO044	0.361347	0.112728	NA	-0.00247109	0.322443	0.0211862	NA	0.0577208	NA	0.60729	-1.94373	-0.372109	-0.404385	0.222193	0.294442	NA	-0.0124443	NA	0.725735	NA	-0.00556178	-1.46585	0.12892	NA	NA	-0.184369	NA	0.48972	0.793023	NA	-0.589038	0.536724	-0.0573375	NA	-0.904099	NA	-0.03436	0.354177	-0.371206	0.0952734	0.266764	0.681091	0.672663	NA	NA	NA	0.0526266	0.766915	-0.152294
11CO045	0.244133	-0.0233356	-0.195386	-0.232156	0.0765176	0.0204536	NA	-0.213251	NA	NA	-0.555837	NA	-0.104933	0.284396	-0.0861904	-0.398012	0.131253	NA	0.22697	0.0289062	0.0613467	-2.24107	0.324401	NA	-0.652006	0.0769296	NA	NA	0.00187193	-0.0908968	-0.381367	0.129997	0.0867911	NA	0.19032	NA	-0.131743	-0.0119904	-0.226634	-0.0150459	0.132663	-0.0227006	-0.294025	-0.166456	NA	NA	0.119266	0.741139	0.0146004
11CO047	-0.0135401	0.324969	NA	-0.162923	-0.565698	-0.407106	NA	-0.30559	NA	NA	-1.4324	-0.996973	-0.422616	0.0476867	-0.151368	-0.0180571	0.0809358	NA	1.25074	NA	-0.268173	-1.14898	-0.428021	NA	-0.449001	-0.0884038	NA	NA	1.22418	NA	-0.746977	0.0791383	0.0907084	NA	-0.141707	NA	0.105978	0.274195	0.0807466	0.0840372	-0.288586	0.175339	-0.02889	0.161199	NA	NA	-0.22349	0.0884167	0.0615751
11CO048	0.145691	-0.0692089	NA	0.092574	-0.748861	0.0724623	NA	-0.190434	NA	0.454902	-0.550555	NA	0.19996	-0.00182466	0.0718055	-0.222226	0.127173	NA	0.484139	0.169663	-0.260311	-0.911424	0.00246506	NA	NA	-0.107926	NA	NA	0.773989	NA	-0.502965	0.407614	-0.187802	NA	-0.186624	-0.255517	-0.158151	0.160397	-0.0772672	-0.0141244	-0.0169282	0.244323	0.219302	0.153823	NA	NA	-0.0947791	-1.04429	-0.783169
11CO051	0.0116924	-0.0475083	NA	0.475143	-0.0111549	0.14759	NA	-0.462526	NA	NA	-0.566004	NA	-0.282121	-0.215098	-0.194591	NA	0.111494	NA	NA	NA	-0.0517659	-0.578175	0.0923857	NA	NA	-0.42668	0.451031	NA	1.15655	NA	-0.404707	0.515051	0.14686	NA	-0.0130058	2.19963	-0.0360144	0.15544	0.031099	-0.144448	0.104042	0.339961	0.0278596	0.174579	NA	NA	-0.136602	0.545347	-0.704965
11CO052	0.235003	0.0392986	-0.186481	0.290651	-0.168856	-0.0627216	0.0567407	-0.0448058	NA	NA	-2.92899	NA	-0.330695	0.0636511	0.1524	-0.215292	0.207852	NA	0.38467	-0.0176858	-0.0562079	-1.51557	0.347453	NA	-0.24295	-0.248676	NA	NA	0.433296	0.383658	-0.624319	0.444808	0.0362153	NA	-0.104099	NA	0.123408	0.610695	0.00913706	0.184977	0.143098	0.380118	0.41161	-0.076724	NA	0.241007	-0.0175211	0.184631	-0.511883
11CO053	0.290903	-0.0679612	NA	0.242931	0.185934	-0.568715	0.550634	-0.309991	0.976913	0.350867	-1.0243	-0.365961	-0.46497	0.30636	0.439172	-0.246321	0.0959301	0.0561827	-0.357296	NA	-0.118871	-0.368994	0.235751	NA	-0.712186	0.449082	-0.491335	NA	-0.489844	NA	-0.0180279	0.409371	0.117673	NA	-0.705528	-0.505203	0.156273	0.236421	-0.0908191	-0.394811	-0.0118376	0.0693217	-0.207903	NA	NA	NA	0.423026	-0.148743	-0.836731
11CO054	-0.280554	-0.130436	NA	-0.555435	0.51473	-0.224087	NA	-0.849505	NA	1.58339	-2.54928	NA	0.0148002	0.125357	-0.0557018	NA	0.161659	NA	0.980788	NA	-0.055683	-1.39096	-0.386956	NA	NA	-0.110996	-0.51747	NA	1.6273	NA	-0.494785	0.00388654	-0.0102298	NA	-0.372035	NA	0.216061	-0.129974	-0.137747	-0.0211905	-0.325993	-0.212151	0.0451447	0.40876	NA	NA	-0.116546	-0.441636	-0.557462
11CO057	-0.0839758	-0.085631	NA	0.176147	0.50569	-0.0985784	NA	-0.14502	-0.159064	NA	-1.48037	-0.142996	-0.198271	-0.0596819	-0.189437	0.737109	0.069595	0.169727	0.583633	-0.26064	0.176089	-1.27531	-0.41446	NA	-0.629037	-0.0735354	0.468699	-0.0732292	0.464278	NA	-0.0565533	-0.185664	-0.0140101	NA	0.107101	NA	0.419688	0.0255987	0.0774096	-0.0252822	0.102469	-0.0389581	-0.168515	NA	NA	0.522975	0.0571687	1.25715	0.569301
11CO058	-0.197788	-0.058225	-0.385037	-0.04871	-0.234156	-0.322058	NA	0.373985	-0.683251	0.085199	-0.156282	-0.508822	0.327371	0.0807361	0.223887	NA	0.188821	0.0221964	-0.247478	NA	0.203138	0.0793368	-0.24106	-0.137896	NA	0.048088	NA	NA	-1.90147	NA	0.225913	-0.702367	0.144268	NA	-0.192052	-0.513973	0.251689	0.238112	0.314585	-0.522773	0.0134554	-0.358445	-0.194406	-0.212519	NA	NA	0.214904	-0.240319	-0.165081
11CO061	0.219368	0.135637	NA	0.498986	-0.492327	0.035656	NA	0.290663	0.248696	NA	-1.19532	0.247474	0.0334396	-0.141951	0.334526	0.0519943	-0.0510657	0.389019	0.880757	NA	0.0221845	-0.398651	-0.378506	NA	NA	-0.491423	NA	NA	1.11873	-0.330974	-0.211284	0.255756	0.223651	0.296187	-0.793496	NA	0.256248	0.227415	0.142126	0.39	0.154619	0.622267	0.159533	-0.195825	NA	-0.0160036	-0.143953	1.00688	0.235379
11CO062	-0.0658231	0.335446	NA	0.397275	-0.86447	0.229751	NA	0.507516	NA	NA	-1.43628	-1.43049	-0.129873	-0.411264	-0.332029	0.454292	0.283207	NA	0.285277	NA	-0.24087	-1.16937	0.209034	NA	0.383855	-0.433068	NA	NA	0.762572	NA	-0.211502	-0.0465081	-0.210582	NA	0.0314412	NA	-0.00568255	-0.202619	0.00700579	0.115404	0.165267	0.628256	-0.646637	-0.0212639	NA	NA	-0.225266	0.131873	0.317155
11CO070	-0.0358163	0.261404	NA	0.0453479	0.10216	-0.54316	-1.76071	-0.0701507	NA	NA	-1.2534	-0.698702	-1.16772	-0.0233536	-0.329582	0.330112	-0.117487	-0.60544	0.4311	NA	-0.145479	-1.92289	-0.649596	-0.051585	0.179973	-0.190829	NA	NA	-0.697151	-0.0597453	-0.109454	0.195274	0.201651	0.266657	-0.0043901	-0.562118	0.192425	NA	0.316366	0.556171	-0.0594824	0.100545	-0.031161	0.618627	NA	NA	-0.0316804	0.468392	0.0726033
11CO072	-0.542504	0.140485	NA	0.367736	0.70182	0.103745	NA	0.287989	NA	NA	-1.75667	-1.01682	0.282438	0.279378	0.413531	-0.321064	0.423077	NA	0.387863	NA	-0.0199483	-0.488795	0.105757	NA	0.125702	0.443773	NA	NA	-0.712735	NA	0.632032	0.306589	0.225566	NA	0.250176	NA	0.432846	0.0824997	0.0281741	0.157835	-0.488509	-0.197676	-0.460633	0.184638	NA	NA	0.476426	1.34993	-0.480153
11CO077	0.306398	0.174286	NA	0.303784	0.239727	0.0765386	NA	0.0833224	-0.214559	0.0738317	-1.95533	NA	-0.0619294	0.280316	0.47832	NA	0.0909594	NA	NA	NA	0.174477	-2.61373	-0.323687	NA	NA	0.141905	NA	NA	0.220377	NA	-0.0435822	-0.107595	0.0405963	NA	-0.984064	NA	-0.189962	0.0131367	0.213624	-0.138395	0.00135854	0.427315	0.0590526	NA	NA	NA	0.162174	0.369326	-0.106963
11CO079	0.0715468	-0.16858	0.0734687	-0.426742	-0.0564356	-0.117379	NA	-0.114404	NA	-0.110972	-1.11662	NA	0.0204564	0.442323	0.0912408	NA	0.285415	NA	0.341845	NA	0.302918	-0.806513	0.263209	NA	-0.0985514	0.117879	0.23925	NA	0.277523	NA	-0.399549	-0.826486	0.00457831	0.368928	-0.435805	-0.777455	0.0777091	-0.0798724	0.183471	-0.0590272	-0.161562	-0.605164	0.369538	-0.283487	NA	0.152364	0.0818134	-1.09777	-0.481175
14CO003	0.254474	-0.194081	0.702969	0.60461	-0.617052	0.171486	NA	0.299141	NA	NA	-2.09472	NA	0.370012	0.721457	0.738841	-0.548012	0.433816	NA	0.286964	0.321366	-0.499229	-1.16484	0.487121	NA	-0.284417	0.25298	NA	NA	0.695915	-0.386418	-0.728331	1.18058	0.222929	NA	-0.415886	NA	-0.0856883	-0.0461075	-0.674852	-0.305009	0.125833	0.755541	0.597207	-0.415266	NA	NA	-0.0829385	0.255746	-0.571038
14CO005	0.119066	0.199829	NA	0.212612	-0.105128	-0.193694	NA	0.173528	-0.370831	NA	-0.763587	-0.537282	0.274133	0.0896629	0.306721	0.0250106	0.304498	-0.268902	0.20617	-0.0326255	0.126596	-0.433709	-0.0591992	NA	0.0301669	-0.0122806	-1.25769	0.0690173	-0.341681	NA	0.311857	-0.179262	0.12049	NA	-0.234074	NA	0.0343619	0.236475	0.0810992	-0.147453	-0.161014	0.0770022	-0.187359	NA	NA	0.192036	0.0691621	1.7944	0.21755
15CO001	0.896572	0.563968	NA	0.832592	-0.178931	-0.0551484	-1.90735	-0.304393	NA	NA	-1.81408	0.309175	0.320616	0.534377	0.986563	-0.121601	0.0541002	-0.932014	-0.484424	NA	0.402442	-1.84272	-0.262179	0.214039	0.281187	0.0961935	NA	NA	-1.37338	0.00973548	0.842308	-0.99285	0.109305	0.199583	1.042	-0.461129	-0.106886	NA	-1.07541	-0.0803422	-0.0523099	-0.164723	0.105439	-0.161231	NA	NA	0.061385	-0.78288	1.11214
15CO002	0.0984953	-0.280651	0.0744683	-0.275146	0.0378723	-0.486485	-1.67256	0.344803	NA	0.0285481	-2.07109	NA	0.428953	0.0678587	0.119172	NA	0.0703621	NA	-0.112861	NA	NA	0.583207	0.0406387	NA	-0.159803	0.190822	0.304238	NA	-0.993415	0.0542371	-0.00671398	0.0362512	0.229858	NA	-0.470519	NA	0.0681635	0.270838	0.0497472	-0.0372277	-0.163865	-0.0523103	0.299506	-0.0234413	0.100176	NA	0.271713	-0.196515	0.335079
16CO002	0.0353181	0.0656314	-0.377338	0.265642	-0.204901	1.90948	NA	-0.119746	-1.68709	0.460093	-0.850285	-0.508176	-0.0388104	0.69509	1.0254	NA	0.0287397	-0.924718	-0.666064	NA	0.545348	2.8032	-0.39166	-0.271912	NA	0.419322	NA	NA	-2.25104	NA	1.97188	-0.725402	0.174387	NA	-0.40104	-0.220098	0.0422554	-0.23303	0.203779	-0.431455	0.501098	0.377117	0.286064	-0.261956	NA	NA	0.291014	1.70841	0.737574
16CO003	-0.0370181	-0.2295	NA	-0.115026	0.436828	-0.343062	0.93812	-0.377976	NA	NA	1.0406	0.186475	-0.647121	0.109216	-0.138162	0.288872	0.0113686	0.0173447	0.285155	NA	-0.118254	0.951907	-0.184793	0.571659	-0.146862	-0.0312314	NA	NA	-0.500955	-0.171885	-0.0395728	0.300532	-0.191822	-0.182448	-0.523733	-0.37307	0.485325	NA	0.420937	-0.197713	0.0903464	0.2743	0.0712747	-0.0322008	NA	NA	-0.150984	1.19577	0.111087
16CO006	-0.0892989	0.09663	NA	0.244194	0.0650175	-0.224733	NA	-0.339689	0.30018	NA	-0.914663	-0.174631	-0.261309	0.0557855	-0.0996328	-0.0774639	0.176524	0.083324	0.594266	NA	0.362292	-1.24491	-0.252785	NA	NA	-0.344535	NA	NA	0.536235	0.640734	-0.319386	-0.401942	-0.083709	0.395333	-0.260916	NA	-0.22398	-0.00192398	0.371974	-0.137518	0.293226	0.11823	0.509185	0.740135	NA	0.0942992	0.142627	0.110921	0.260442
16CO011	-0.469695	0.252769	NA	0.0352909	0.460029	-0.690339	NA	-0.810323	NA	NA	-1.52176	NA	0.147177	1.12979	-0.157987	NA	0.447154	NA	NA	NA	-0.471268	-3.09844	0.186727	NA	NA	0.487707	-0.537252	NA	-0.66936	NA	0.138006	-0.0907453	0.356796	NA	0.278431	-1.27783	-0.206837	-0.349474	-0.347538	-0.48709	-0.305185	-0.172715	-0.928276	-0.701938	NA	NA	0.428922	-0.840174	-0.683909
20CO001	0.0719582	-0.251685	NA	0.351604	0.125659	-0.00573838	NA	-0.778654	-0.0227788	0.696671	-0.59784	-0.643251	-0.0033791	-1.28064	-0.399015	NA	-0.172371	NA	0.0945726	NA	-0.646893	-0.280201	0.385947	NA	NA	0.00218024	0.159778	NA	-0.261494	NA	-0.959275	0.546633	0.711873	-0.916591	-0.0199498	0.493059	-0.230106	0.207111	-1.51413	-0.226372	0.0907034	0.380729	-0.644892	NA	NA	NA	-0.0334995	-1.01215	-0.0204352
20CO003	-0.254497	-0.107459	0.0171635	-0.15541	0.130018	-0.190491	0.622546	-0.557449	NA	-0.524953	-0.0225181	NA	-0.29407	0.0325244	-0.260304	NA	0.0431314	NA	0.304999	NA	NA	-0.730514	-0.280542	NA	-0.00162839	-0.0638843	-0.344902	NA	-0.4431	0.219155	0.279397	0.448882	-0.0807119	NA	-0.751558	NA	-0.0150777	0.433436	0.0417354	-0.11162	-0.0444219	-0.145198	-0.260316	-0.0257262	0.752698	NA	0.0384294	0.560745	-0.0589888
20CO004	-0.417035	-0.0437799	0.32276	0.375718	0.419504	-0.221633	0.0778593	0.489715	NA	NA	-3.73187	NA	0.0287091	0.0888449	0.250562	-0.528845	0.350926	NA	-0.163083	0.0220985	0.484853	-0.633658	-0.0678734	NA	-0.971168	0.851942	NA	NA	0.589606	-0.501145	-0.298438	-0.97924	0.231854	NA	0.450755	NA	-0.0916992	-1.00991	-0.16986	0.144025	-0.384224	0.548774	-0.294355	-0.299087	NA	-0.531752	0.0756112	0.200037	0.0267458
20CO006	0.607522	-0.253451	-0.0766325	0.351053	0.0134378	-0.350745	0.0405948	0.182746	0.303584	0.123056	-2.43666	NA	0.20533	0.181774	0.778338	0.262328	-0.0230756	NA	-0.473762	NA	0.130557	0.593509	0.356948	-0.455753	NA	0.202985	-0.164012	NA	-0.642325	NA	-0.462893	-0.421752	0.00511874	NA	0.903488	-0.485468	-0.288434	-0.347527	-0.377679	-0.132393	0.0583564	0.549681	0.306092	0.705214	NA	NA	-0.111877	0.454023	0.225833
20CO007	0.3201	0.347227	NA	-0.080898	0.436407	-0.274082	0.610234	0.178614	0.729074	-0.937395	-2.55149	-0.715372	0.251671	-0.139707	0.677509	-0.343098	0.252606	-0.50857	-0.378091	NA	-0.552471	-0.298126	0.241133	NA	-0.493758	0.536663	-1.20277	NA	-0.624029	NA	-0.278232	0.519483	0.217793	NA	0.429354	-0.776722	-0.324598	0.123132	-0.294408	0.07782	-0.159626	0.904909	-0.216447	NA	NA	NA	0.339732	-0.494992	0.225457
21CO006	-0.147158	-0.0404361	0.209677	-0.292616	0.320146	0.0542463	NA	0.198794	NA	NA	-0.161112	NA	-0.288903	0.0851728	-0.424717	-0.148663	0.137215	NA	0.271534	0.0413017	0.119842	0.0768323	0.0872893	NA	0.571604	-0.162024	NA	NA	-0.293169	0.0640362	-0.122236	0.0545157	0.00990489	NA	-0.250661	NA	0.00277201	0.281658	0.156246	-0.245945	-0.135201	-0.279929	-0.0771447	-0.176175	NA	NA	0.0582185	0.572472	-0.0833367
21CO007	0.035531	0.100306	NA	0.461601	0.212927	-0.177233	-1.77145	-0.571485	NA	-0.306238	-2.28246	NA	0.259841	0.643878	0.373482	-0.00400675	0.291007	NA	-0.533978	NA	-0.114375	-1.36555	0.405309	0.189493	NA	0.364873	-1.04099	-0.579343	-0.301578	NA	-0.0574701	-0.746286	0.183118	NA	0.0747303	NA	-0.058337	0.0105035	1.12148	-0.0186739	-0.192041	0.129016	0.0145558	-0.448623	NA	0.309455	0.61903	2.02274	-0.331159
22CO004	0.405874	-0.362422	NA	0.362676	0.00961472	0.825234	NA	0.404052	-0.362577	0.255598	-2.17797	NA	0.322438	0.298829	0.579851	NA	0.117571	NA	NA	NA	-0.822294	0.857176	0.312826	NA	NA	0.559117	NA	NA	-1.03104	NA	-0.0694469	-0.0221482	0.299575	NA	-0.105094	NA	-0.401814	-0.350156	-0.424268	0.378076	-0.041694	-0.00492025	-0.265562	NA	NA	NA	0.181532	-0.267405	-0.457161
22CO006	0.216116	0.145375	-0.295007	0.346591	-0.283399	0.221962	-0.563181	-0.717338	-0.285263	-0.00236527	-1.79067	NA	-0.930893	-0.159723	-0.409521	-0.296729	-0.0465796	NA	0.521936	NA	0.00519498	-1.97833	0.146088	-0.180922	NA	-0.339439	0.0763607	NA	1.13343	NA	-0.938344	0.436883	0.0598984	NA	-0.693738	-0.139446	0.331299	0.438111	0.487446	-0.157834	0.189753	0.180774	-0.0996657	-0.108618	NA	NA	0.0662475	0.519756	0.0895191
27CO004	-0.240985	0.252264	NA	-0.501849	0.129337	-0.321251	NA	0.439524	0.0565353	NA	-1.54116	NA	0.204894	-0.213571	0.169509	-0.245876	0.173443	NA	0.152748	-0.399587	-0.265861	-0.185248	0.229372	NA	NA	-0.0673169	NA	-0.0596855	-0.633445	NA	-0.55685	-0.153975	0.350495	NA	0.229685	NA	0.252703	0.465806	0.0386314	-0.44729	-0.488474	-1.04017	-0.64549	NA	NA	NA	0.250635	0.561438	-0.0926724
[truncated: 5,000 more columns]

## Sheet: MCP_unique_DEPs
Supp.Data7.Tab4 The MCP uniquely identified DEPs from the CRC data.
Index	UNIPROT	SYMBOL
1	O60888	CUTA
2	P0DJI8	SAA1
3	P0DJI9	SAA2
4	P30086	PEBP1
5	P32754	HPD
6	P55056	APOC4
7	P55268	LAMB2
8	P62328	TMSB4X
9	P69891	HBG1
10	Q00013	MPP1
11	Q02413	DSG1
12	Q13508	ART3
13	Q15323	KRT31
14	Q8IWV2	CNTN4
15	Q8NBJ4	GOLM1
16	Q92496	CFHR4
17	Q9BXR6	CFHR5
18	Q9UEW3	MARCO
19	Q9Y279	VSIG4

## Sheet: survival_analysis_results
Supp.Data7.Tab5 The results of survival analysis on the MCP uniquely identified DEPs from the CRC data.
UniProt_ID	Symbol	Log_rank_p	N_Low	N_High	FDR_p
O60888	CUTA	0.0864	49	48	0.268
P0DJI8	SAA1	0.0854	44	44	0.268
P0DJI9	SAA2	0.317	23	23	0.563
P30086	PEBP1	0.0949	49	48	0.268
P55056	APOC4	0.597	21	20	0.796
P55268	LAMB2	0.346	49	48	0.563
P62328	TMSB4X	0.973	49	48	1
P69891	HBG1	1	14	13	1
Q00013	MPP1	0.965	49	48	1
Q8NBJ4	GOLM1	0.112	49	48	0.268
Q9BXR6	CFHR5	0.375	49	48	0.563
Q9Y279	VSIG4	0.0141	49	48	0.169
Supp.Data7.Tab6 The results of cox regression analysis on the MCP uniquely identified DEPs from the CRC data.
SYMBOL	association	UNIPROT	is_control	contrast_level	ref_level	n_contrast	n_ref	beta	HR	lower_95	upper_95	p.value	global.pval	significant
SAA1	PMID:36345658	P0DJI8	FALSE	SAA1	SAA1	88	88	0.422	1.52	0.738	3.15	0.255	0.291	ns
SAA2	PMID:24744574	P0DJI9	FALSE	SAA2	SAA2	46	46	-0.193	0.824	0.0301	22.6	0.909	0.909	ns
PEBP1	PMID:17179102	P30086	FALSE	PEBP1	PEBP1	97	97	-0.337	0.714	0.0934	5.46	0.746	0.751	ns
HPD	PMID:36813208	P32754	FALSE	NA	NA	NA	NA	NA	NA	NA	NA	NA	NA	ns
TMSB4X	PMID:17072345	P62328	FALSE	TMSB4X	TMSB4X	97	97	0.267	1.31	0.611	2.8	0.491	0.483	ns
GOLM1	PMID:40414849	Q8NBJ4	FALSE	GOLM1	GOLM1	97	97	-0.808	0.446	0.0869	2.29	0.333	0.328	ns
MARCO	PMID:36958650	Q9UEW3	FALSE	NA	NA	NA	NA	NA	NA	NA	NA	NA	NA	ns
VSIG4	PMID:40405491	Q9Y279	FALSE	VSIG4	VSIG4	97	97	2.37	10.7	1.61	71.6	0.0142	0.00479	p<0.05
CUTA	NA	O60888	FALSE	CUTA	CUTA	97	97	0.534	1.71	0.115	25.3	0.698	0.697	ns
APOC4	NA	P55056	FALSE	APOC4	APOC4	41	41	0.135	1.14	0.243	5.39	0.864	0.865	ns
LAMB2	NA	P55268	FALSE	LAMB2	LAMB2	97	97	0.167	1.18	0.343	4.07	0.792	0.793	ns
HBG1	NA	P69891	FALSE	HBG1	HBG1	27	27	NA	NA	NA	NA	NA	1	ns
MPP1	NA	Q00013	FALSE	MPP1	MPP1	97	97	-0.487	0.615	0.0531	7.12	0.697	0.694	ns
DSG1	NA	Q02413	FALSE	NA	NA	NA	NA	NA	NA	NA	NA	NA	NA	ns
ART3	NA	Q13508	FALSE	NA	NA	NA	NA	NA	NA	NA	NA	NA	NA	ns
KRT31	NA	Q15323	FALSE	NA	NA	NA	NA	NA	NA	NA	NA	NA	NA	ns
CNTN4	NA	Q8IWV2	FALSE	NA	NA	NA	NA	NA	NA	NA	NA	NA	NA	ns
CFHR4	NA	Q92496	FALSE	NA	NA	NA	NA	NA	NA	NA	NA	NA	NA	ns
CFHR5	NA	Q9BXR6	FALSE	CFHR5	CFHR5	97	97	0.837	2.31	0.72	7.41	0.159	0.175	ns
Supp.Data7.Tab7 The data ussed to plot survival curve for VSIG4 gene.
OS_time	OS_status	VSIG4	group
531	0	-0.482859	Low
365	0	-0.660132	Low
369	0	-1.28207	Low
155	0	-1.12605	Low
371	0	-1.37507	Low
374	0	-0.287316	High
357	0	-1.40285	Low
376	0	-1.17087	Low
350	0	-1.2683	Low
321	0	-0.362124	Low
328	0	-0.392232	Low
387	0	-1.0402	Low
130	1	-0.292476	High
371	0	-0.146625	High
318	0	-1.34473	Low
326	0	-1.05081	Low
358	0	-0.613226	Low
338	0	0.231576	High
337	0	-0.110731	High
373	0	-0.244397	High
360	0	-1.70009	Low
340	0	-0.410817	Low
214	1	0.0168707	High
362	0	0.196114	High
365	0	-1.13762	Low
354	0	-0.839406	Low
344	0	-1.04382	Low
334	0	-0.121364	High
328	0	-0.360332	Low
299	0	-1.69489	Low
363	0	-1.56851	Low
355	0	-0.185989	High
84	0	-1.55803	Low
322	0	-0.209676	High
293	0	-0.158104	High
39	0	-0.478098	Low
343	0	-0.66313	Low
243	0	-0.73581	Low
183	0	-0.615889	Low
323	0	-0.9664	Low
362	0	-1.18988	Low
273	0	-0.876277	Low
207	0	-0.725133	Low
315	0	-0.88446	Low
384	0	0.594024	High
378	0	0.0637614	High
384	0	0.487658	High
375	0	0.430869	High
371	0	-0.0037072	High
373	0	-0.0609501	High
370	0	-0.516002	Low
95	1	0.757368	High
382	0	0.414917	High
378	0	-0.392528	Low
369	0	-0.116674	High
386	0	-0.3033	High
368	0	-0.351162	Low
385	0	0.698622	High
367	0	0.228939	High
368	0	0.160234	High
386	0	-0.705564	Low
375	0	-0.62103	Low
375	0	-0.179525	High
235	1	0.136293	High
385	0	-0.465974	Low
384	0	0.132313	High
383	0	-0.129685	High
417	0	0.110549	High
223	1	0.602235	High
411	0	-0.102483	High
404	0	-0.31929	High
399	0	0.0884618	High
399	0	-0.247749	High
388	0	0.385575	High
379	0	0.237411	High
372	0	0.827015	High
133	0	-0.29426	High
383	0	-0.640122	Low
377	0	-0.496674	Low
504	0	-1.82185	Low
466	0	0.139042	High
353	0	-0.749569	Low
321	0	-0.158735	High
420	0	0.299994	High
376	0	0.0155512	High
177	0	-0.111833	High
420	0	-1.76467	Low
353	0	-4.07899	Low
318	1	0.0805155	High
347	0	-0.723274	Low
309	0	-1.32502	Low
279	0	-0.468554	Low
368	0	0.239465	High
279	0	-0.27125	High
346	0	-1.44175	Low
334	0	0.0629573	High
435	0	-0.348966	Low
