# Supplementary material
Source: Research Square preprint supplement (doi:10.21203/rs.3.rs-9367379/v1)
Supplement: Supplementary file 5 [file bb7ed08f792e3d980b31aa87.xlsx]

## Sheet: Sheet1
supp.data1. Tab.1 Case study datasets
dataset	Objective	ID	technique	groups	replicates	replicate type	instrument	species	database	concentration	PMID	Year	hyperlink
TSD	view complementary investigation; case study of DEA	PXD028735	DIA	B-A	A:9, B:9	technique	TimsToF pro	human,yeast,ecoli	uniportkb_UP000005640_AND_reviewed_true;uniportkb_UP000002311_AND_reviewed_true;uniportkb_UP000000625_AND_reviewed_true;	A: HYE=65:30:5;B:HYE=65:15:20	35354825	2022	https://proteomecentral.proteomexchange.org/cgi/GetDataset?ID=PXD028735
TNC-discovery	Check the performance of DEA methods;train patient diagnosis model	IPX0001444000	DIA	benign-malignant	benign:380, malignant:199	biological	Q Exactive HF	human	uniportkb_UP000005640_AND_reviewed_true	-	36068205	2022	https://www.iprox.cn//page/SCV017.html?query=IPX0001444000
TNC-retrospective	test patient diagnosis model	IPX0001444000	DIA	benign-malignant	benign:144, malignant:144	biological	Q Exactive HF	human	uniportkb_UP000005640_AND_reviewed_true	-	36068205	2022	https://www.iprox.cn//page/SCV017.html?query=IPX0001444000
CRC	test MCP for novel biomarker detection	PXD065825/IPX0012491000	DIA	Normal-Cancer	Normal:7, cancer:41	biological	Orbitrap Exploris 480	human	uniportkb_UP000005640_AND_reviewed_true	-	-	2025	https://www.iprox.cn/page/project.html?id=IPX0012491000
U2OS_bulk	test MCP for INF-gramma response protein identification from bulk data	PXD048162	DDA	INF-y0h-INF-y24h	INF-y0h:3-INF-y24h:3	biological	Orbitrap Fusion	human	uniportkb_UP000005640_AND_reviewed_true	-	39327420	2024	https://www.ebi.ac.uk/pride/archive/projects/PXD048162
U2OS_scp	test MCP for INF-gramma response protein identification from single cell data	PXD053464	DIA	INF-y0h-INF-y24h	INF-y0h:82-INF-y24h:81	biological	timsTOF Pro2	human	uniportkb_UP000005640_AND_reviewed_true	-	39327420	2024	https://www.ebi.ac.uk/pride/archive/projects/PXD053464
supp.data1. Tab.2 Spike-in Datasets used for DEA methods benchmarking
dataset	ID	technique	contrast_num	used contrasts	replicates	instrument	mixture	database	concentration	PMID	Year	hyperlink	website	raw quantification outputs, expression matrices and benchmarking results	fp_link
HYE5600735_DDA	PXD028735	DDA	1	B-A	A:9, B:9	SCIEX Triple TOF5600	human+yeast+ecoli	uniportkb_UP000005640_AND_reviewed_true;uniportkb_UP000002311_AND_reviewed_true;uniportkb_UP000000625_AND_reviewed_true;	A: HYE=65:30:5;B:HYE=65:15:20	35354825	2022	https://proteomecentral.proteomexchange.org/cgi/GetDataset?ID=PXD028735	https://www.ebi.ac.uk/pride/archive/projects/PXD028735	http://www.ai4pro.tech:3838	ftp://ftp.pride.ebi.ac.uk/pride/data/archive/2021/11/PXD028735
HYE6600735_DDA	PXD028735	DDA	1	B-A	A:9, B:9	SCIEX Triple TOF6600	human+yeast+ecoli	uniportkb_UP000005640_AND_reviewed_true;uniportkb_UP000002311_AND_reviewed_true;uniportkb_UP000000625_AND_reviewed_true;	A: HYE=65:30:5;B:HYE=65:15:20	35354825	2022	https://proteomecentral.proteomexchange.org/cgi/GetDataset?ID=PXD028735	https://www.ebi.ac.uk/pride/archive/projects/PXD028735	http://www.ai4pro.tech:3838	ftp://ftp.pride.ebi.ac.uk/pride/data/archive/2021/11/PXD028735
HYEqe735_DDA	PXD028735	DDA	1	B-A	A:12, B:12	Orbitrap QE-HFX	human+yeast+ecoli	uniportkb_UP000005640_AND_reviewed_true;uniportkb_UP000002311_AND_reviewed_true;uniportkb_UP000000625_AND_reviewed_true;	A: HYE=65:30:5;B:HYE=65:15:20	35354825	2022	https://proteomecentral.proteomexchange.org/cgi/GetDataset?ID=PXD028735	https://www.ebi.ac.uk/pride/archive/projects/PXD028735	http://www.ai4pro.tech:3838	ftp://ftp.pride.ebi.ac.uk/pride/data/archive/2021/11/PXD028735
HYEtims735_DDA	PXD028735	DDA	1	B-A	A:7, B:7	TimsToF pro	human+yeast+ecoli	uniportkb_UP000005640_AND_reviewed_true;uniportkb_UP000002311_AND_reviewed_true;uniportkb_UP000000625_AND_reviewed_true;	A: HYE=65:30:5;B:HYE=65:15:20	35354825	2022	https://proteomecentral.proteomexchange.org/cgi/GetDataset?ID=PXD028735	https://www.ebi.ac.uk/pride/archive/projects/PXD028735	http://www.ai4pro.tech:3838	ftp://ftp.pride.ebi.ac.uk/pride/data/archive/2021/11/PXD028735
HYtims134_DDA	PXD036134	DDA	3	C-B;D-B;D-C	B:3,C:3,D:3	TimsToF pro	human+yeast	uniportkb_UP000005640_AND_reviewed_true;uniportkb_UP000002311_AND_reviewed_true	Yeast: B:12.5; C:15.625; D:18.75	36541440	2023	https://proteomecentral.proteomexchange.org/cgi/GetDataset?ID=PXD036134	https://www.ebi.ac.uk/pride/archive/projects/PXD036134	http://www.ai4pro.tech:3838	ftp://ftp.pride.ebi.ac.uk/pride/data/archive/2023/03/PXD036134
HEtims425_DDA	PXD021425	DDA	3	B-A;C-A;C-B	A:3,B:3,C:3	TimsToF pro	human+ecoli	uniportkb_UP000005640_AND_reviewed_true;uniportkb_UP000000625_AND_reviewed_true;	Ecoli: A:4.5; B:6; C:9	34373457	2021	https://proteomecentral.proteomexchange.org/cgi/GetDataset?ID=PXD021425	https://www.ebi.ac.uk/pride/archive/projects/PXD021425	http://www.ai4pro.tech:3838	ftp://ftp.pride.ebi.ac.uk/pride/data/archive/2021/07/PXD021425
YUltq006_DDA	PDC000006	DDA	2	E-B;D-C	A:3,B:3,C:3,D:3,E:3	LTQ-Orbitrap	yeast+UPS1	uniportkb_UP000000625_AND_reviewed_true;UPS1	UPS1: A:0.25;B:0.74;C:2.2;D:6.7;E:20	19858499	2010	https://proteomic.datacommons.cancer.gov/pdc/TechnologyAdvancementStudies/	https://proteomic.datacommons.cancer.gov/pdc/TechnologyAdvancementStudies/	http://www.ai4pro.tech:3838	https://proteomic.datacommons.cancer.gov/pdc/TechnologyAdvancementStudies/
YUltq099_DDA	PXD002099	DDA	2	E-C;D-B	A:3,B:3,C:3,D:3,E:3	LTQ Orbitrap Velos	yeast+UPS1	uniportkb_UP000000625_AND_reviewed_true;UPS1	UPS1:A:2;B:4;C:10;D:25;E:50	26321463	2015	https://proteomecentral.proteomexchange.org/cgi/GetDataset?ID=PXD002099	https://www.ebi.ac.uk/pride/archive/projects/PXD002099	http://www.ai4pro.tech:3838	ftp://ftp.pride.ebi.ac.uk/pride/data/archive/2015/09/PXD002099
HEqe408_DDA	PXD018408	DDA	1	B-A	A:8,B:8	Q Exactive	human+ecoli	uniportkb_UP000005640_AND_reviewed_true;uniportkb_UP000000625_AND_reviewed_true;	Ecoli: A:100; B:200	33553868	2021	https://proteomecentral.proteomexchange.org/cgi/GetDataset?ID=PXD018408	https://www.ebi.ac.uk/pride/archive/projects/PXD018408	http://www.ai4pro.tech:3838	ftp://massive.ucsd.edu/MSV000085239/
HYqfl683_DDA	PXD007683	DDA	3	B-A;C-A;C-B	A:3,B:4,C:4	Orbitrap Fusion Lumos	human+yeast	uniportkb_UP000005640_AND_reviewed_true;uniportkb_UP000002311_AND_reviewed_true	Yeast: A:10;B:5;C:3.3	29635916	2018	https://proteomecentral.proteomexchange.org/cgi/GetDataset?ID=PXD007683	https://www.ebi.ac.uk/pride/archive/projects/PXD007683	http://www.ai4pro.tech:3838	ftp://ftp.pride.ebi.ac.uk/pride/data/archive/2018/04/PXD007683
HYEtims777_DDA	PXD014777	DDA	1	B-A	A:3,B:3	TimsToF pro	human+yeast+ecoli	uniportkb_UP000005640_AND_reviewed_true;uniportkb_UP000002311_AND_reviewed_true;uniportkb_UP000000625_AND_reviewed_true;	A: HYE=1:2:1;B:HYE=1:1:4	32156793	2020	https://proteomecentral.proteomexchange.org/cgi/GetDataset?ID=PXD014777	https://www.ebi.ac.uk/pride/archive/projects/PXD014777	http://www.ai4pro.tech:3838	ftp://ftp.pride.ebi.ac.uk/pride/data/archive/2020/04/PXD014777
HYEtims735_DIA	PXD028735	DIA	1	B-A	A:9, B:9	TimsToFpro	human+yeast+ecoli	uniportkb_UP000005640_AND_reviewed_true;uniportkb_UP000002311_AND_reviewed_true;uniportkb_UP000000625_AND_reviewed_true;	A: HYE=65:30:5;B:HYE=65:15:20	35354825	2022	https://proteomecentral.proteomexchange.org/cgi/GetDataset?ID=PXD028735	https://www.ebi.ac.uk/pride/archive/projects/PXD028735	http://www.ai4pro.tech:3838	ftp://ftp.pride.ebi.ac.uk/pride/data/archive/2021/11/PXD028735
MYtims709_DIA	PXD034709	DIA	3	C-B;C-A;E-C	A:5,B:5,C:10,D:5,E:5,F:5	timsTOF Pro	mouse+yeast	uniportkb_UP000000589_AND_reviewed_true;uniportkb_UP000002311_AND_reviewed_true	Mouse: A:5; B:10;C:20;D:40;E:13.3;F:30	36609502	2023	https://proteomecentral.proteomexchange.org/cgi/GetDataset?ID=PXD034709	http://www.iprox.org/page/project.html?id=IPX0004576000	http://www.ai4pro.tech:3838	http://www.iprox.org/page/project.html?id=IPX0004576000
HEof_n600_DIA	PXD026600	DIA	3	E-C;G-F;E-B	A:3,B:3,C:3,D:3,E:3,F:3,G:3,H:3	Orbitrap Fusion ETD	UPS1 + E.coli	uniportkb_UP000000625_AND_reviewed_true;UPS1	UPS1: A:0.1;B:0.25;C:1;D:2.5;E:5;F:10;G:25;H:50	34472865	2021	https://proteomecentral.proteomexchange.org/cgi/GetDataset?ID=PXD026600	https://massive.ucsd.edu/ProteoSAFe/dataset.jsp?task=69c2b1bd22cd4933887b4b4846da1bd7	http://www.ai4pro.tech:3838	ftp://massive.ucsd.edu/MSV000087597/
HEof_w600_DIA	PXD026600	DIA	3	E-A;A-B;F-C	A:3,B:3,C:3,D:3,E:3,F:3,G:3,H:3	Orbitrap Fusion ETD	UPS1 + E.coli	uniportkb_UP000000625_AND_reviewed_true;UPS1	UPS1: A:0.1;B:0.25;C:1;D:2.5;E:5;F:10;G:25;H:50	34472865	2021	https://proteomecentral.proteomexchange.org/cgi/GetDataset?ID=PXD026600	https://massive.ucsd.edu/ProteoSAFe/dataset.jsp?task=69c2b1bd22cd4933887b4b4846da1bd7	http://www.ai4pro.tech:3838	ftp://massive.ucsd.edu/MSV000087597/
HYtims134_DIA	PXD036134	DIA	3	C-B;D-B;D-C	B:3,C:3,D:3	TimsToF pro	human+yeast	uniportkb_UP000005640_AND_reviewed_true;uniportkb_UP000002311_AND_reviewed_true	Yeast: B:12.5; C:15.625; D:18.75	36541440	2023	https://proteomecentral.proteomexchange.org/cgi/GetDataset?ID=PXD036134	https://www.ebi.ac.uk/pride/archive/projects/PXD036134	http://www.ai4pro.tech:3838	ftp://ftp.pride.ebi.ac.uk/pride/data/archive/2023/03/PXD036134
HEqe777_DIA	PXD019777	DIA	3	C-A;B-A;C-B	A:3,B:3,C:3	Q Exactive HF	human+ecoli	uniportkb_UP000005640_AND_reviewed_true;uniportkb_UP000000625_AND_reviewed_true;	Ecoli: A:4.5; B:6; C:9	34373457	2021	https://proteomecentral.proteomexchange.org/cgi/GetDataset?ID=PXD019777	https://www.ebi.ac.uk/pride/archive/projects/PXD019777	http://www.ai4pro.tech:3838	ftp://ftp.pride.ebi.ac.uk/pride/data/archive/2021/07/PXD019777
HEqe408_DIA	PXD018408	DIA	1	B-A	A:8,B:8	Q Exactive	human+ecoli	uniportkb_UP000005640_AND_reviewed_true;uniportkb_UP000000625_AND_reviewed_true;	Ecoli: A:100; B:200	33553868	2021	https://proteomecentral.proteomexchange.org/cgi/GetDataset?ID=PXD018408	https://www.ebi.ac.uk/phttps://massive.ucsd.edu/ProteoSAFe/dataset.jsp?task=e9c7a48efe454054832fba5e0e004771ride/archive/projects/PXD028735	http://www.ai4pro.tech:3838	ftp://massive.ucsd.edu/MSV000085239/
