# Supplementary material
Source: Research Square preprint supplement (doi:10.21203/rs.3.rs-9367379/v1)
Supplement: Supplementary file 6 [file d5103168318f89feccb88272.xlsx]

## Sheet: benchmark_DDA_FragPipe
Supp.data3. Tab1 Median MCC scores of different methods for detecting DEPs from 11 DDA benchmark sets processed with FragPipe. 1,2,3,4,5, means dlfq, maxlfq, top0, top3 and count respectively.
combinations	dlfq	maxlfq	top0	top3	count	hurdle	ETMC	DMVLS	MCP
1_2	0.65	0.54	NA	NA	NA	0.64	0.64	0.61	0.69
1_3	0.65	NA	0.58	NA	NA	0.6	0.66	0.61	0.74
1_4	0.65	NA	NA	0.59	NA	0.6	0.64	0.63	0.74
1_5	0.65	NA	NA	NA	0.46	0.66	0.65	0.7	0.74
2_3	NA	0.54	0.58	NA	NA	0.59	0.59	0.56	0.66
2_4	NA	0.54	NA	0.59	NA	0.59	0.59	0.61	0.64
2_5	NA	0.54	NA	NA	0.46	0.59	0.61	0.61	0.64
3_4	NA	NA	0.58	0.59	NA	0.56	0.68	0.63	0.69
3_5	NA	NA	0.58	NA	0.46	0.6	0.67	0.71	0.71
4_5	NA	NA	NA	0.59	0.46	0.61	0.67	0.7	0.72
1_2_3	0.65	0.54	0.58	NA	NA	0.6	0.7	0.66	0.73
1_2_4	0.65	0.54	NA	0.59	NA	0.59	0.69	0.64	0.72
1_2_5	0.65	0.54	NA	NA	0.46	0.65	0.64	0.71	0.73
1_3_4	0.65	NA	0.58	0.59	NA	0.57	0.64	0.68	0.74
1_3_5	0.65	NA	0.58	NA	0.46	0.61	0.69	0.71	0.74
1_4_5	0.65	NA	NA	0.59	0.46	0.62	0.64	0.71	0.74
2_3_4	NA	0.54	0.58	0.59	NA	0.58	0.59	0.61	0.64
2_3_5	NA	0.54	0.58	NA	0.46	0.62	0.59	0.58	0.67
2_4_5	NA	0.54	NA	0.59	0.46	0.62	0.6	0.62	0.66
3_4_5	NA	NA	0.58	0.59	0.46	0.58	0.66	0.7	0.72
1_2_3_4	0.65	0.54	0.58	0.59	NA	0.58	0.68	0.66	0.72
1_2_3_5	0.65	0.54	0.58	NA	0.46	0.61	0.66	0.7	0.71
1_2_4_5	0.65	0.54	NA	0.59	0.46	0.61	0.65	0.7	0.74
1_3_4_5	0.65	NA	0.58	0.59	0.46	0.59	0.64	0.69	0.73
2_3_4_5	NA	0.54	0.58	0.59	0.46	0.59	0.61	0.59	0.66
1_2_3_4_5	0.65	0.54	0.58	0.59	0.46	0.59	0.67	0.7	0.73
Supp.data3. Tab2 Median Precision scores of different methods for detecting DEPs from 11 DDA benchmark sets processed with FragPipe. 1,2,3,4,5, means dlfq, maxlfq, top0, top3 and count respectively.
combinations	dlfq	maxlfq	top0	top3	count	hurdle	ETMC	DMVLS	MCP
1_2	0.93	0.97	NA	NA	NA	0.92	0.97	0.87	0.98
1_3	0.93	NA	0.86	NA	NA	0.85	0.9	0.83	0.95
1_4	0.93	NA	NA	0.86	NA	0.86	0.91	0.87	0.94
1_5	0.93	NA	NA	NA	0.86	0.89	0.91	0.88	0.94
2_3	NA	0.97	0.86	NA	NA	0.86	0.95	0.78	0.93
2_4	NA	0.97	NA	0.86	NA	0.87	0.95	0.82	0.93
2_5	NA	0.97	NA	NA	0.86	0.89	0.97	0.82	0.95
3_4	NA	NA	0.86	0.86	NA	0.8	0.87	0.83	0.88
3_5	NA	NA	0.86	NA	0.86	0.83	0.89	0.83	0.9
4_5	NA	NA	NA	0.86	0.86	0.84	0.89	0.85	0.9
1_2_3	0.93	0.97	0.86	NA	NA	0.82	0.92	0.89	0.96
1_2_4	0.93	0.97	NA	0.86	NA	0.83	0.91	0.88	0.94
1_2_5	0.93	0.97	NA	NA	0.86	0.86	0.9	0.91	0.96
1_3_4	0.93	NA	0.86	0.86	NA	0.78	0.88	0.85	0.93
1_3_5	0.93	NA	0.86	NA	0.86	0.81	0.88	0.85	0.92
1_4_5	0.93	NA	NA	0.86	0.86	0.82	0.84	0.86	0.92
2_3_4	NA	0.97	0.86	0.86	NA	0.79	0.94	0.81	0.93
2_3_5	NA	0.97	0.86	NA	0.86	0.83	0.94	0.69	0.93
2_4_5	NA	0.97	NA	0.86	0.86	0.83	0.96	0.7	0.94
3_4_5	NA	NA	0.86	0.86	0.86	0.77	0.79	0.83	0.9
1_2_3_4	0.93	0.97	0.86	0.86	NA	0.77	0.9	0.87	0.93
1_2_3_5	0.93	0.97	0.86	NA	0.86	0.78	0.89	0.83	0.92
1_2_4_5	0.93	0.97	NA	0.86	0.86	0.77	0.9	0.85	0.92
1_3_4_5	0.93	NA	0.86	0.86	0.86	0.75	0.8	0.82	0.9
2_3_4_5	NA	0.97	0.86	0.86	0.86	0.74	0.95	0.51	0.93
1_2_3_4_5	0.93	0.97	0.86	0.86	0.86	0.74	0.85	0.82	0.93
Supp.data3. Tab3 Median Recall scores of different methods for detecting DEPs from 11 DDA benchmark sets processed with FragPipe. 1,2,3,4,5, means dlfq, maxlfq, top0, top3 and count respectively.
combinations	dlfq	maxlfq	top0	top3	count	hurdle	ETMC	DMVLS	MCP
1_2	0.53	0.39	NA	NA	NA	0.54	0.55	0.55	0.59
1_3	0.53	NA	0.56	NA	NA	0.56	0.59	0.67	0.66
1_4	0.53	NA	NA	0.54	NA	0.56	0.6	0.68	0.67
1_5	0.53	NA	NA	NA	0.39	0.58	0.58	0.7	0.68
2_3	NA	0.39	0.56	NA	NA	0.56	0.45	0.67	0.54
2_4	NA	0.39	NA	0.54	NA	0.56	0.47	0.66	0.53
2_5	NA	0.39	NA	NA	0.39	0.5	0.46	0.59	0.52
3_4	NA	NA	0.56	0.54	NA	0.56	0.6	0.66	0.68
3_5	NA	NA	0.56	NA	0.39	0.59	0.61	0.73	0.68
4_5	NA	NA	NA	0.54	0.39	0.59	0.62	0.71	0.67
1_2_3	0.53	0.39	0.56	NA	NA	0.57	0.65	0.67	0.66
1_2_4	0.53	0.39	NA	0.54	NA	0.56	0.62	0.64	0.66
1_2_5	0.53	0.39	NA	NA	0.39	0.6	0.61	0.63	0.65
1_3_4	0.53	NA	0.56	0.54	NA	0.57	0.62	0.7	0.66
1_3_5	0.53	NA	0.56	NA	0.39	0.62	0.66	0.77	0.7
1_4_5	0.53	NA	NA	0.54	0.39	0.62	0.63	0.77	0.7
2_3_4	NA	0.39	0.56	0.54	NA	0.56	0.49	0.78	0.58
2_3_5	NA	0.39	0.56	NA	0.39	0.61	0.47	0.73	0.59
2_4_5	NA	0.39	NA	0.54	0.39	0.61	0.47	0.75	0.59
3_4_5	NA	NA	0.56	0.54	0.39	0.62	0.64	0.71	0.71
1_2_3_4	0.53	0.39	0.56	0.54	NA	0.57	0.64	0.74	0.66
1_2_3_5	0.53	0.39	0.56	NA	0.39	0.62	0.66	0.77	0.7
1_2_4_5	0.53	0.39	NA	0.54	0.39	0.62	0.65	0.7	0.7
1_3_4_5	0.53	NA	0.56	0.54	0.39	0.62	0.66	0.85	0.69
2_3_4_5	NA	0.39	0.56	0.54	0.39	0.62	0.5	0.91	0.61
1_2_3_4_5	0.53	0.39	0.56	0.54	0.39	0.62	0.64	0.72	0.71

## Sheet: benchmark_DDA_Maxquant
Supp.data3. Tab4 Median MCC scores of different methods for detecting DEPs from 11 DDA benchmark sets processed with Maxquant. 1,2,3,4,5, means dlfq, maxlfq, top0, top3 and count respectively.
combinations	dlfq	maxlfq	top0	top3	count	hurdle	ETMC	DMVLS	MCP
1_2	0.69	0.56	NA	NA	NA	0.71	0.72	0.67	0.74
1_3	0.69	NA	0.63	NA	NA	0.68	0.75	0.74	0.77
1_4	0.69	NA	NA	0.65	NA	0.71	0.75	0.71	0.79
1_5	0.69	NA	NA	NA	0.42	0.64	0.71	0.67	0.8
2_3	NA	0.56	0.63	NA	NA	0.67	0.66	0.65	0.7
2_4	NA	0.56	NA	0.65	NA	0.7	0.63	0.67	0.68
2_5	NA	0.56	NA	NA	0.42	0.58	0.63	0.56	0.68
3_4	NA	NA	0.64	0.65	NA	0.65	0.72	0.69	0.76
3_5	NA	NA	0.64	NA	0.42	0.63	0.69	0.7	0.73
4_5	NA	NA	NA	0.65	0.42	0.66	0.72	0.67	0.73
1_2_3	0.69	0.56	0.63	NA	NA	0.7	0.74	0.65	0.77
1_2_4	0.69	0.56	NA	0.65	NA	0.71	0.76	0.71	0.77
1_2_5	0.69	0.56	NA	NA	0.42	0.64	0.72	0.7	0.77
1_3_4	0.69	NA	0.63	0.65	NA	0.68	0.77	0.75	0.83
1_3_5	0.69	NA	0.63	NA	0.42	0.67	0.75	0.69	0.8
1_4_5	0.69	NA	NA	0.65	0.42	0.7	0.71	0.65	0.78
2_3_4	NA	0.56	0.63	0.65	NA	0.65	0.65	0.69	0.7
2_3_5	NA	0.56	0.63	NA	0.42	0.64	0.64	0.6	0.67
2_4_5	NA	0.56	NA	0.65	0.42	0.67	0.66	0.62	0.67
3_4_5	NA	NA	0.63	0.65	0.42	0.63	0.73	0.71	0.72
1_2_3_4	0.69	0.56	0.63	0.65	NA	0.68	0.74	0.77	0.78
1_2_3_5	0.69	0.56	0.63	NA	0.42	0.67	0.74	0.69	0.77
1_2_4_5	0.69	0.56	NA	0.65	0.42	0.7	0.72	0.66	0.78
1_3_4_5	0.69	NA	0.63	0.65	0.42	0.67	0.72	0.7	0.77
2_3_4_5	NA	0.56	0.63	0.65	0.42	0.64	0.64	0.59	0.62
1_2_3_4_5	0.69	0.56	0.63	0.65	0.42	0.66	0.71	0.65	0.78
Supp.data3. Tab5 Median Precision scores of different methods for detecting DEPs from 11 DDA benchmark sets processed with Maxquant. 1,2,3,4,5, means dlfq, maxlfq, top0, top3 and count respectively.
combinations	dlfq	maxlfq	top0	top3	count	hurdle	ETMC	DMVLS	MCP
1_2	0.93	0.96	NA	NA	NA	0.9	0.96	0.92	0.97
1_3	0.93	NA	0.84	NA	NA	0.85	0.92	0.79	0.96
1_4	0.93	NA	NA	0.89	NA	0.87	0.93	0.83	0.92
1_5	0.93	NA	NA	NA	0.86	0.89	0.85	0.77	0.93
2_3	NA	0.96	0.84	NA	NA	0.83	0.95	0.79	0.93
2_4	NA	0.96	NA	0.89	NA	0.88	0.97	0.8	0.95
2_5	NA	0.96	NA	NA	0.86	0.88	0.83	0.71	0.92
3_4	NA	NA	0.85	0.9	NA	0.81	0.92	0.81	0.89
3_5	NA	NA	0.85	NA	0.85	0.83	0.89	0.78	0.9
4_5	NA	NA	NA	0.9	0.85	0.86	0.9	0.71	0.93
1_2_3	0.93	0.96	0.84	NA	NA	0.83	0.94	0.81	0.96
1_2_4	0.93	0.96	NA	0.89	NA	0.83	0.94	0.79	0.96
1_2_5	0.93	0.96	NA	NA	0.86	0.87	0.91	0.8	0.94
1_3_4	0.93	NA	0.84	0.89	NA	0.79	0.9	0.79	0.94
1_3_5	0.93	NA	0.84	NA	0.86	0.83	0.89	0.7	0.9
1_4_5	0.93	NA	NA	0.89	0.86	0.86	0.88	0.71	0.89
2_3_4	NA	0.96	0.84	0.89	NA	0.79	0.93	0.76	0.91
2_3_5	NA	0.96	0.84	NA	0.86	0.8	0.78	0.68	0.84
2_4_5	NA	0.96	NA	0.89	0.86	0.85	0.84	0.67	0.9
3_4_5	NA	NA	0.84	0.89	0.86	0.78	0.88	0.8	0.84
1_2_3_4	0.93	0.96	0.84	0.89	NA	0.78	0.92	0.81	0.94
1_2_3_5	0.93	0.96	0.84	NA	0.86	0.8	0.89	0.75	0.88
1_2_4_5	0.93	0.96	NA	0.89	0.86	0.84	0.89	0.76	0.9
1_3_4_5	0.93	NA	0.84	0.89	0.86	0.78	0.86	0.75	0.89
2_3_4_5	NA	0.96	0.84	0.89	0.86	0.76	0.86	0.61	0.83
1_2_3_4_5	0.93	0.96	0.84	0.89	0.86	0.76	0.88	0.55	0.92
Supp.data3. Tab6 Median Recall scores of different methods for detecting DEPs from 11 DDA benchmark sets processed with Maxquant. 1,2,3,4,5, means dlfq, maxlfq, top0, top3 and count respectively.
dlfq	maxlfq	top0	top3	count	hurdle	ETMC	DMVLS	MCP	列1
1_2	0.61	0.41	NA	NA	NA	0.69	0.64	0.6	0.71
1_3	0.61	NA	0.67	NA	NA	0.78	0.71	0.81	0.79
1_4	0.61	NA	NA	0.66	NA	0.78	0.72	0.81	0.78
1_5	0.61	NA	NA	NA	0.24	0.67	0.68	0.77	0.77
2_3	NA	0.41	0.67	NA	NA	0.7	0.56	0.72	0.67
2_4	NA	0.41	NA	0.66	NA	0.69	0.54	0.76	0.67
2_5	NA	0.41	NA	NA	0.24	0.47	0.58	0.68	0.64
3_4	NA	NA	0.68	0.67	NA	0.73	0.69	0.74	0.81
3_5	NA	NA	0.68	NA	0.25	0.68	0.69	0.84	0.8
4_5	NA	NA	NA	0.67	0.25	0.68	0.72	0.88	0.81
1_2_3	0.61	0.41	0.67	NA	NA	0.78	0.7	0.76	0.78
1_2_4	0.61	0.41	NA	0.66	NA	0.8	0.7	0.78	0.78
1_2_5	0.61	0.41	NA	NA	0.24	0.7	0.68	0.77	0.75
1_3_4	0.61	NA	0.67	0.66	NA	0.81	0.76	0.85	0.86
1_3_5	0.61	NA	0.67	NA	0.24	0.78	0.73	0.88	0.8
1_4_5	0.61	NA	NA	0.66	0.24	0.78	0.67	0.82	0.84
2_3_4	NA	0.41	0.67	0.66	NA	0.74	0.57	0.87	0.71
2_3_5	NA	0.41	0.67	NA	0.24	0.71	0.61	0.86	0.69
2_4_5	NA	0.41	NA	0.66	0.24	0.72	0.63	0.88	0.69
3_4_5	NA	NA	0.67	0.68	0.24	0.74	0.77	0.89	0.86
1_2_3_4	0.61	0.41	0.67	0.66	NA	0.82	0.71	0.86	0.83
1_2_3_5	0.61	0.41	0.67	NA	0.24	0.78	0.71	0.87	0.8
1_2_4_5	0.61	0.41	NA	0.66	0.24	0.81	0.66	0.8	0.83
1_3_4_5	0.61	NA	0.67	0.66	0.24	0.81	0.65	0.88	0.84
2_3_4_5	NA	0.41	0.67	0.66	0.24	0.75	0.65	0.87	0.74
1_2_3_4_5	0.61	0.41	0.67	0.66	0.24	0.82	0.66	0.85	0.8

## Sheet: benchmark_DIA_DIANN
Supp.data3. Tab7 Median MCC scores of different methods for detecting DEPs from 7 DIA benchmark sets processed with DIA-NN. 1,2,3,4, means dlfq, maxlfq, top3, and top1 respectively.
combinations	dlfq	maxlfq	top3	top1	hurdle	ETMC	DMVLS	MCP
1_2	0.41	0.41	NA	NA	0.42	0.79	0.68	0.86
1_3	0.41	NA	0.4	NA	0.52	0.79	0.51	0.84
1_4	0.41	NA	NA	0.29	0.51	0.69	0.59	0.82
2_3	NA	0.41	0.4	NA	0.46	0.83	0.71	0.83
2_4	NA	0.41	NA	0.29	0.45	0.76	0.43	0.8
3_4	NA	NA	0.4	0.29	0.45	0.62	0.51	0.58
1_2_3	0.41	0.41	0.4	NA	0.55	0.73	0.63	0.86
1_2_4	0.41	0.41	NA	0.29	0.55	0.77	0.54	0.87
1_3_4	0.41	NA	0.4	0.29	0.56	0.68	0.64	0.79
2_3_4	NA	0.41	0.4	0.29	0.52	0.44	0.73	0.8
1_2_3_4	0.41	0.41	0.4	0.29	0.58	0.84	0.63	0.84
Supp.data3. Tab8 Median Precision scores of different methods for detecting DEPs from 7 DIA benchmark sets processed with DIA-NN. 1,2,3,4, means dlfq, maxlfq, top3, and top1 respectively.
combinations	dlfq	maxlfq	top3	top1	hurdle	ETMC	DMVLS	MCP
1_2	0.97	0.94	NA	NA	0.96	0.95	0.85	0.98
1_3	0.97	NA	0.83	NA	0.91	0.93	0.78	0.99
1_4	0.97	NA	NA	0.6	0.83	0.85	0.75	0.96
2_3	NA	0.94	0.83	NA	0.88	0.93	0.89	0.88
2_4	NA	0.94	NA	0.6	0.78	0.83	0.85	0.9
3_4	NA	NA	0.83	0.6	0.65	0.77	0.72	0.79
1_2_3	0.97	0.94	0.83	NA	0.89	0.94	0.8	0.95
1_2_4	0.97	0.94	NA	0.6	0.81	0.88	0.74	0.98
1_3_4	0.97	NA	0.83	0.6	0.77	0.77	0.82	0.95
2_3_4	NA	0.94	0.83	0.6	0.73	0.92	0.87	0.9
1_2_3_4	0.97	0.94	0.83	0.6	0.76	0.89	0.79	0.97
Supp.data3. Tab9 Median Recall scores of different methods for detecting DEPs from 7 DIA benchmark sets processed with DIA-NN. 1,2,3,4, means dlfq, maxlfq, top3, and top1 respectively.
combinations	dlfq	maxlfq	top3	top1	hurdle	ETMC	DMVLS	MCP
1_2	0.59	0.6	NA	NA	0.61	0.83	0.7	0.85
1_3	0.59	NA	0.39	NA	0.6	0.79	0.51	0.84
1_4	0.59	NA	NA	0.28	0.54	0.69	0.76	0.84
2_3	NA	0.6	0.39	NA	0.6	0.86	0.63	0.86
2_4	NA	0.6	NA	0.28	0.54	0.86	0.28	0.85
3_4	NA	NA	0.39	0.28	0.41	0.66	0.45	0.7
1_2_3	0.59	0.6	0.39	NA	0.62	0.8	0.66	0.84
1_2_4	0.59	0.6	NA	0.28	0.61	0.83	0.69	0.86
1_3_4	0.59	NA	0.39	0.28	0.6	0.69	0.79	0.84
2_3_4	NA	0.6	0.39	0.28	0.6	0.56	0.75	0.88
1_2_3_4	0.59	0.6	0.39	0.28	0.62	0.82	0.86	0.84

## Sheet: benchmark_DIA_Spectronaut
Supp.data3. Tab10 Median MCC scores of different methods for detecting DEPs from 7 DIA benchmark sets processed with Spectronaut. 1,2,3,4, means dlfq, maxlfq, top3, and top1 respectively.
combinations	dlfq	maxlfq	top3	top1	hurdle	ETMC	DMVLS	MCP
1_2	0.6	0.55	NA	NA	0.59	0.79	0.65	0.76
1_3	0.6	NA	0.38	NA	0.52	0.75	0.6	0.83
1_4	0.6	NA	NA	0.33	0.49	0.71	0.59	0.84
2_3	NA	0.55	0.38	NA	0.44	0.76	0.51	0.79
2_4	NA	0.55	NA	0.33	0.43	0.76	0.54	0.81
3_4	NA	NA	0.38	0.33	0.46	0.62	0.35	0.7
1_2_3	0.6	0.55	0.38	NA	0.46	0.76	0.6	0.86
1_2_4	0.6	0.55	NA	0.33	0.48	0.69	0.63	0.78
1_3_4	0.6	NA	0.38	0.33	0.51	0.68	0.55	0.85
2_3_4	NA	0.55	0.38	0.33	0.49	0.7	0.54	0.72
1_2_3_4	0.6	0.55	0.38	0.33	0.52	0.79	0.65	0.8
Supp.data3. Tab11 Median Precision scores of different methods for detecting DEPs from 7 DIA benchmark sets processed with Spectronaut. 1,2,3,4, means dlfq, maxlfq, top3, and top1 respectively.
combinations	dlfq	maxlfq	top3	top1	hurdle	ETMC	DMVLS	MCP
1_2	0.94	0.87	NA	NA	0.89	0.83	0.77	0.94
1_3	0.94	NA	0.92	NA	0.93	0.88	0.76	0.98
1_4	0.94	NA	NA	0.82	0.88	0.87	0.72	0.97
2_3	NA	0.87	0.92	NA	0.91	0.86	0.97	0.85
2_4	NA	0.87	NA	0.82	0.85	0.86	0.88	0.86
3_4	NA	NA	0.92	0.82	0.84	0.83	0.87	0.88
1_2_3	0.94	0.87	0.92	NA	0.89	0.91	0.73	0.93
1_2_4	0.94	0.87	NA	0.82	0.84	0.81	0.71	0.91
1_3_4	0.94	NA	0.92	0.82	0.84	0.81	0.71	0.96
2_3_4	NA	0.87	0.92	0.82	0.81	0.92	0.9	0.85
1_2_3_4	0.94	0.87	0.92	0.82	0.81	0.86	0.69	0.93
Supp.data3. Tab12 Median Recall scores of different methods for detecting DEPs from 7 DIA benchmark sets processed with Spectronaut. 1,2,3,4, means dlfq, maxlfq, top3, and top1 respectively.
combinations	dlfq	maxlfq	top3	top1	hurdle	ETMC	DMVLS	MCP
1_2	0.67	0.69	NA	NA	0.73	0.88	0.74	0.83
1_3	0.67	NA	0.52	NA	0.68	0.8	0.64	0.82
1_4	0.67	NA	NA	0.38	0.65	0.76	0.69	0.83
2_3	NA	0.69	0.52	NA	0.7	0.88	0.32	0.84
2_4	NA	0.69	NA	0.38	0.69	0.77	0.38	0.85
3_4	NA	NA	0.52	0.38	0.53	0.75	0.35	0.73
1_2_3	0.67	0.69	0.52	NA	0.76	0.87	0.65	0.87
1_2_4	0.67	0.69	NA	0.38	0.75	0.88	0.78	0.86
1_3_4	0.67	NA	0.52	0.38	0.72	0.7	0.65	0.86
2_3_4	NA	0.69	0.52	0.38	0.71	0.61	0.38	0.88
1_2_3_4	0.67	0.69	0.52	0.38	0.76	0.86	0.77	0.88

## Sheet: Reference_view_effection
Supp.data3. Tab13 Affection of choice of reference view for MCP on performance of DEP detection tested on 7 DIA datasets processed by DIA-NN.
reference	partner	mcc_median	prec_median	rec_median
dlfq	maxlfq	0.860498	0.981539	0.845676
dlfq	top1	0.824982	0.958501	0.843109
dlfq	top3	0.844711	0.989633	0.840762
maxlfq	dlfq	0.827584	0.97619	0.803642
maxlfq	top1	0.803855	0.897436	0.853262
maxlfq	top3	0.834682	0.883925	0.860862
top1	dlfq	0.580212	0.747417	0.706085
top1	maxlfq	0.52482	0.782997	0.766751
top1	top3	0.499152	0.695867	0.698483
top3	dlfq	0.692742	0.93419	0.690846
top3	maxlfq	0.652792	0.91137	0.797281
top3	top1	0.580011	0.789645	0.699115
Supp.data3. Tab14 Affection of choice of reference view for MCP on performance of DEP detection tested on 7 DIA datasets processed by Spectronaut.
reference	partner	mcc_median	prec_median	rec_median
dlfq	maxlfq	0.763025	0.936997	0.829937
dlfq	top1	0.839554	0.966521	0.825439
dlfq	top3	0.828094	0.984008	0.816525
maxlfq	dlfq	0.763866	0.838923	0.854503
maxlfq	top1	0.806708	0.863597	0.846061
maxlfq	top3	0.794761	0.849642	0.841734
top1	dlfq	0.689553	0.840754	0.785928
top1	maxlfq	0.562358	0.869652	0.842238
top1	top3	0.583974	0.80625	0.689796
top3	dlfq	0.743275	0.933163	0.775564
top3	maxlfq	0.688275	0.889473	0.816413
top3	top1	0.697005	0.875134	0.727817
Supp.data3. Tab15 Affection of choice of reference view for MCP on performance of DEP detection tested on 11 DDA datasets processed by FragPipe.
reference	partner	mcc_median	prec_median	rec_median
count	dlfq	0.679435	0.931891	0.616098
count	maxlfq	0.604873	0.949851	0.490714
count	top0	0.628091	0.932479	0.598412
count	top3	0.639946	0.899172	0.616816
dlfq	count	0.743166	0.941629	0.681214
dlfq	maxlfq	0.690187	0.975793	0.591082
dlfq	top0	0.737685	0.952659	0.660816
dlfq	top3	0.742331	0.938994	0.670601
maxlfq	count	0.63745	0.953878	0.517731
maxlfq	dlfq	0.633647	0.959911	0.51328
maxlfq	top0	0.657223	0.933888	0.538674
maxlfq	top3	0.637412	0.929641	0.531308
top0	count	0.713784	0.896947	0.678179
top0	dlfq	0.736484	0.9049	0.665413
top0	maxlfq	0.693436	0.921168	0.630141
top0	top3	0.685043	0.87677	0.677103
top3	count	0.720088	0.90371	0.672498
top3	dlfq	0.740055	0.917927	0.654649
top3	maxlfq	0.688188	0.922738	0.595316
top3	top0	0.713951	0.906889	0.653517
Supp.data3. Tab16 Affection of choice of reference view for MCP on performance of DEP detection tested on 11 DDA datasets processed by Maxquant.
reference	partner	mcc_median	prec_median	rec_median
count	dlfq	0.640461	0.957346	0.530962
count	maxlfq	0.562646	0.899471	0.458484
count	top0	0.63569	0.939023	0.507825
count	top3	0.656895	0.927953	0.614445
dlfq	count	0.795444	0.92665	0.768313
dlfq	maxlfq	0.739033	0.966369	0.705938
dlfq	top0	0.773964	0.958869	0.792164
dlfq	top3	0.791254	0.917401	0.780396
maxlfq	count	0.677102	0.915254	0.642784
maxlfq	dlfq	0.672007	0.964034	0.628652
maxlfq	top0	0.695467	0.931573	0.669503
maxlfq	top3	0.675653	0.952915	0.67042
top0	count	0.730628	0.904915	0.799898
top0	dlfq	0.75959	0.898143	0.783454
top0	maxlfq	0.753994	0.920405	0.785471
top0	top3	0.755287	0.885466	0.806617
top3	count	0.734308	0.931805	0.810684
top3	dlfq	0.764659	0.95858	0.813757
top3	maxlfq	0.765562	0.960226	0.745251
top3	top0	0.778227	0.929991	0.803733

## Sheet: ablation_study
Supp.data3. Tab17 Ablation study for evaluating contributions of modules in MCP by testing on 11 DDA datasets processed by FragPipe. The view combination of dlfq_top is used as it achieves the highest performances in benchmarking.
Type	Metric	Mean	Median	sd
MCP	MCC	0.736365	0.743166	0.106663
MCP	pAUC	0.850127	0.833642	0.0735248
MCP	Precision	0.88314	0.941629	0.184478
MCP	Recall	0.721914	0.681214	0.166252
MCP	F1	0.761045	0.778856	0.128816
Balancing	MCC	0.704622	0.716189	0.141088
Balancing	pAUC	0.821171	0.812125	0.0895492
Balancing	Precision	0.849532	0.938973	0.22804
Balancing	Recall	0.715664	0.655483	0.170222
Balancing	F1	0.731245	0.762934	0.16945
Contrastive	MCC	0.718675	0.717306	0.128512
Contrastive	pAUC	0.856286	0.830527	0.0700308
Contrastive	Precision	0.877141	0.949561	0.210864
Contrastive	Recall	0.707899	0.67315	0.164316
Contrastive	F1	0.744515	0.776975	0.153192
C-Attention	MCC	0.733541	0.733762	0.12229
C-Attention	pAUC	0.856211	0.834613	0.0702489
C-Attention	Precision	0.878907	0.945083	0.203079
C-Attention	Recall	0.721986	0.687084	0.146053
C-Attention	F1	0.760188	0.773994	0.142548
Supp.data3. Tab18 Ablation study for evaluating contributions of modules in MCP by testing on 11 DDA datasets processed by Maxquant. The view combination of dlfq_top0_top3 is used as it achieves the highest performances in benchmarking.
Type	Metric	Mean	Median	sd
MCP	MCC	0.780575	0.830833	0.17541
MCP	pAUC	0.87724	0.888604	0.0909593
MCP	Precision	0.861015	0.941302	0.236077
MCP	Recall	0.813857	0.855072	0.150123
MCP	F1	0.800127	0.882883	0.199101
Balancing	MCC	0.738282	0.781377	0.157331
Balancing	pAUC	0.86815	0.877232	0.079289
Balancing	Precision	0.804551	0.908323	0.251641
Balancing	Recall	0.802189	0.830349	0.151794
Balancing	F1	0.757708	0.820135	0.186182
Contrastive	MCC	0.761348	0.79714	0.156647
Contrastive	pAUC	0.88388	0.900012	0.0874761
Contrastive	Precision	0.823689	0.941602	0.240767
Contrastive	Recall	0.814464	0.843215	0.128773
Contrastive	F1	0.783365	0.845831	0.179949
C-Attention	MCC	0.751669	0.799642	0.158243
C-Attention	pAUC	0.877383	0.902779	0.0811416
C-Attention	Precision	0.831225	0.935217	0.250987
C-Attention	Recall	0.7957	0.822809	0.147951
C-Attention	F1	0.769721	0.825036	0.1851
Supp.data3. Tab19 Ablation study for evaluating contributions of modules in MCP by testing on 7 DIA datasets processed by DIANN. The view combination of dlfq_maxlfq_top1 is used as it achieves the highest performances in benchmarking.
Type	Metric	Mean	Median	sd
MCP	MCC	0.75423	0.867192	0.203909
MCP	pAUC	0.905257	0.956601	0.120706
MCP	Precision	0.877772	0.982305	0.151705
MCP	Recall	0.804131	0.862691	0.223301
MCP	F1	0.805415	0.893164	0.166894
Balancing	MCC	0.714633	0.804392	0.22418
Balancing	pAUC	0.857224	0.919331	0.145273
Balancing	Precision	0.855128	0.976717	0.172928
Balancing	Recall	0.772876	0.864196	0.241886
Balancing	F1	0.768625	0.821411	0.202275
Contrastive	MCC	0.72163	0.808342	0.208459
Contrastive	pAUC	0.880196	0.938961	0.131507
Contrastive	Precision	0.84444	0.931018	0.168588
Contrastive	Recall	0.784012	0.856537	0.220835
Contrastive	F1	0.777802	0.820512	0.171937
C-Attention	MCC	0.757392	0.859272	0.198468
C-Attention	pAUC	0.907883	0.950205	0.105139
C-Attention	Precision	0.893541	0.977167	0.129873
C-Attention	Recall	0.789096	0.862691	0.228208
C-Attention	F1	0.80542	0.860014	0.178277
Supp.data3. Tab20 Ablation study for evaluating contributions of modules in MCP by testing on 7 DIA datasets processed by Spectronaut. The view combination of dlfq_maxlfq_top3 is used as it achieves the highest performances in benchmarking.
Type	Metric	Mean	Median	sd
MCP	MCC	0.762515	0.85791	0.214002
MCP	pAUC	0.887339	0.958637	0.124677
MCP	Precision	0.91051	0.929211	0.0866081
MCP	Recall	0.770165	0.87429	0.251041
MCP	F1	0.8077	0.899092	0.20696
Balancing	MCC	0.733367	0.834639	0.216637
Balancing	pAUC	0.896154	0.924852	0.0843195
Balancing	Precision	0.876012	0.956273	0.136512
Balancing	Recall	0.767149	0.876055	0.269222
Balancing	F1	0.77279	0.843439	0.235437
Contrastive	MCC	0.718797	0.847346	0.240615
Contrastive	pAUC	0.880527	0.942647	0.129585
Contrastive	Precision	0.894674	0.93337	0.105421
Contrastive	Recall	0.73905	0.873992	0.291245
Contrastive	F1	0.765447	0.848771	0.23759
C-Attention	MCC	0.715642	0.813784	0.242422
C-Attention	pAUC	0.886692	0.937448	0.137842
C-Attention	Precision	0.869268	0.966302	0.159659
C-Attention	Recall	0.767884	0.870854	0.274974
C-Attention	F1	0.764375	0.82276	0.236765

## Sheet: case
Supp.data3. Tab21 DEPs detected by different methods from the HYEtims735_DIA dataset processed with DIANN. The view combination of dlfq + maxlfq + top1 is used by MCP per the benchmarking.											Supp.data3. Tab22 Performance Metrics for defferent methods in DEP detection shown in Supp.data3. Tab21 .
protein	T_DEP	dlfq	maxlfq	top3	top1	MCP					Method	pAUC.0.01.	pAUC.0.05.	pAUC.0.1.	TP	TN	FP	FN	Recall	Precision	Specificity	F1	MCC	G.mean	nMCC
sp|A5Z2X5|YP010_YEAST	1	1	1	1	1	1					dlfq	0.842858	0.89724	0.914029	3627	7108	48	767	0.825444	0.986939	0.993292	0.898996	0.853405	0.905487	0.926703
sp|O13297|CET1_YEAST	1	1	1	1	1	1					maxlfq	0.776793	0.827055	0.847785	2658	7128	28	1736	0.604916	0.989576	0.996087	0.750847	0.690675	0.77624	0.845338
sp|O13329|FOB1_YEAST	1	1	0	0	0	1					top3	0.632015	0.690556	0.715898	2396	6925	231	1998	0.545289	0.912067	0.967719	0.682524	0.594161	0.726421	0.797081
sp|O13535|YH11B_YEAST	1	1	1	1	1	1					top1	0.598018	0.653032	0.679475	2401	6555	601	1993	0.546427	0.7998	0.916015	0.64927	0.511899	0.707485	0.75595
sp|O13539|THP2_YEAST	1	0	0	0	0	0					MCP	0.90045	0.963991	0.976306	3693	7134	22	701	0.840464	0.994078	0.996926	0.91084	0.87035	0.915358	0.935175
sp|O13547|CCW14_YEAST	1	1	1	1	1	1
sp|O13563|RPN13_YEAST	1	1	0	0	0	1
sp|O13585|YP089_YEAST	1	1	0	1	1	1
sp|O14455|RL36B_YEAST	1	1	1	1	1	1
sp|O14467|MBF1_YEAST	1	1	1	1	1	1
sp|O14468|YO304_YEAST	1	1	1	0	0	1
sp|O43137|YB085_YEAST	1	0	0	0	0	0
sp|O60200|MDM35_YEAST	1	1	0	1	1	1
sp|O74700|TIM9_YEAST	1	0	1	0	0	0
sp|P00044|CYC1_YEAST	1	1	1	1	1	1
sp|P00045|CYC7_YEAST	1	1	1	1	0	1
sp|P00127|QCR6_YEAST	1	1	1	1	1	1
sp|P00128|QCR7_YEAST	1	1	0	0	0	0
sp|P00175|CYB2_YEAST	1	1	0	1	1	1
sp|P00330|ADH1_YEAST	1	1	0	0	0	1
sp|P00331|ADH2_YEAST	1	1	1	1	0	0
sp|P00350|6PGD_ECOLI	1	1	1	1	1	1
sp|P00358|G3P2_YEAST	1	1	1	1	1	1
sp|P00359|G3P3_YEAST	1	1	0	0	0	0
sp|P00360|G3P1_YEAST	1	1	0	0	0	1
sp|P00363|FRDA_ECOLI	1	1	1	1	1	1
sp|P00370|DHE4_ECOLI	1	1	1	0	0	1
sp|P00427|COX6_YEAST	1	1	1	1	1	1
sp|P00431|CCPR_YEAST	1	1	0	0	1	0
sp|P00445|SODC_YEAST	1	1	1	1	1	1
sp|P00447|SODM_YEAST	1	1	1	1	1	1
sp|P00448|SODM_ECOLI	1	1	1	1	1	1
sp|P00452|RIR1_ECOLI	1	1	1	0	0	1
sp|P00490|PHSM_ECOLI	1	1	1	1	1	1
sp|P00498|HIS1_YEAST	1	1	0	1	0	1
sp|P00509|AAT_ECOLI	1	1	1	1	1	1
sp|P00546|CDK1_YEAST	1	1	1	1	1	1
sp|P00549|KPYK1_YEAST	1	1	0	1	1	1
sp|P00550|PTM3C_ECOLI	1	1	1	1	1	1
sp|P00560|PGK_YEAST	1	1	1	0	0	1
sp|P00562|AK2H_ECOLI	1	0	0	0	0	0
sp|P00572|KTHY_YEAST	1	0	0	1	0	0
sp|P00579|RPOD_ECOLI	1	1	1	1	1	1
sp|P00582|DPO1_ECOLI	1	1	1	1	0	1
sp|P00722|BGAL_ECOLI	1	1	1	0	0	1
sp|P00724|INV2_YEAST	1	1	1	1	1	1
sp|P00729|CBPY_YEAST	1	1	1	1	1	1
sp|P00812|ARGI_YEAST	1	1	1	0	1	0
sp|P00815|HIS2_YEAST	1	1	1	1	1	1
sp|P00817|IPYR_YEAST	1	1	1	0	0	1
sp|P00830|ATPB_YEAST	1	1	0	0	1	1
sp|P00864|CAPP_ECOLI	1	1	1	1	1	1
sp|P00890|CISY1_YEAST	1	1	1	0	0	1
sp|P00899|TRPE_YEAST	1	1	1	1	1	1
sp|P00912|TRPF_YEAST	1	1	0	1	1	0
sp|P00924|ENO1_YEAST	1	1	1	0	0	1
sp|P00925|ENO2_YEAST	1	0	0	0	0	0
sp|P00926|SDHD_ECOLI	1	0	0	0	0	0
sp|P00927|THDH_YEAST	1	1	1	1	1	1
sp|P00931|TRP_YEAST	1	1	1	1	1	1
sp|P00935|METB_ECOLI	1	0	0	0	0	0
sp|P00937|TRPG_YEAST	1	1	1	1	0	1
sp|P00942|TPIS_YEAST	1	1	1	0	1	1
sp|P00944|XYLA_ECOLI	1	1	1	0	0	1
sp|P00946|MANA_ECOLI	1	1	1	1	0	1
sp|P00950|PMG1_YEAST	1	1	1	0	1	1
sp|P00954|SYW_ECOLI	1	1	1	1	1	1
sp|P00956|SYI_ECOLI	1	1	1	1	1	1
sp|P00957|SYA_ECOLI	1	1	1	1	0	1
sp|P00958|SYMC_YEAST	1	1	1	1	1	1
sp|P00959|SYM_ECOLI	1	1	1	1	0	1
sp|P00960|SYGA_ECOLI	1	1	1	1	0	1
sp|P00961|SYGB_ECOLI	1	1	1	0	0	1
sp|P00962|SYQ_ECOLI	1	1	1	0	1	1
sp|P00963|ASNA_ECOLI	1	1	1	1	1	1
sp|P00968|CARB_ECOLI	1	1	1	0	0	1
sp|P01098|STF1_YEAST	1	1	1	1	1	0
sp|P01119|RAS1_YEAST	1	1	0	0	0	0
sp|P01120|RAS2_YEAST	1	1	1	1	1	1
sp|P01123|YPT1_YEAST	1	1	1	1	1	1
sp|P02309|H4_YEAST	1	0	0	0	1	0
sp|P02358|RS6_ECOLI	1	1	1	1	0	1
sp|P02359|RS7_ECOLI	1	1	1	1	1	1
sp|P02381|RMAR_YEAST	1	0	0	1	1	0
sp|P02400|RLA4_YEAST	1	1	0	0	0	1
sp|P02406|RL28_YEAST	1	1	1	1	1	1
sp|P02413|RL15_ECOLI	1	1	1	1	0	1
sp|P02557|TBB_YEAST	1	1	0	1	1	1
sp|P02829|HSP82_YEAST	1	1	1	1	1	1
sp|P02924|ARAF_ECOLI	1	1	1	1	0	1
sp|P02925|RBSB_ECOLI	1	1	1	1	1	1
sp|P02992|EFTU_YEAST	1	1	1	1	1	1
sp|P02994|EF1A_YEAST	1	0	0	0	0	0
sp|P03018|UVRD_ECOLI	1	0	0	0	0	1
sp|P03817|MIOC_ECOLI	1	1	1	1	1	1
sp|P03841|MALM_ECOLI	1	1	1	1	0	1
sp|P03871|REP1_YEAST	1	1	0	1	0	1
sp|P03872|REP2_YEAST	1	1	1	1	1	1
sp|P03874|CBP2_YEAST	1	1	0	1	1	1
sp|P03965|CARB_YEAST	1	1	1	1	0	1
sp|P04036|DAPB_ECOLI	1	1	1	1	1	1
sp|P04037|COX4_YEAST	1	1	0	1	1	1
sp|P04046|PUR1_YEAST	1	1	1	0	0	1
sp|P04050|RPB1_YEAST	1	1	0	0	0	1
sp|P04051|RPC1_YEAST	1	0	0	0	0	0
sp|P04076|ARLY_YEAST	1	1	1	1	1	1
sp|P04079|GUAA_ECOLI	1	1	1	1	0	1
sp|P04128|FIMA1_ECOLI	1	1	1	1	1	1
sp|P04147|PABP_YEAST	1	1	0	0	0	1
sp|P04161|PUR3_YEAST	1	1	0	0	1	1
sp|P04335|FRSA_ECOLI	1	0	0	0	0	1
sp|P04425|GSHB_ECOLI	1	1	1	1	1	1
sp|P04449|RL24A_YEAST	1	1	1	1	1	1
sp|P04456|RL25_YEAST	1	1	0	0	0	1
sp|P04650|RL39_YEAST	1	0	0	1	1	1
sp|P04693|TYRB_ECOLI	1	1	1	1	1	1
sp|P04786|TOP1_YEAST	1	1	0	1	1	1
sp|P04801|SYTC_YEAST	1	1	1	0	0	1
sp|P04802|SYDC_YEAST	1	1	1	0	0	1
sp|P04803|SYWM_YEAST	1	1	0	1	0	0
sp|P04805|SYE_ECOLI	1	1	1	1	0	1
sp|P04806|HXKA_YEAST	1	1	1	1	0	1
sp|P04807|HXKB_YEAST	1	1	1	1	1	1
sp|P04819|DNLI1_YEAST	1	1	1	0	0	1
sp|P04821|CDC25_YEAST	1	1	0	1	1	1
sp|P04825|AMPN_ECOLI	1	1	1	1	1	1
sp|P04840|VDAC1_YEAST	1	1	1	1	1	1
sp|P04949|FLIC_ECOLI	1	1	1	1	0	1
sp|P04951|KDSB_ECOLI	1	1	1	1	1	1
sp|P04982|RBSD_ECOLI	1	1	1	0	1	1
sp|P04983|RBSA_ECOLI	1	1	1	1	1	1
sp|P05020|PYRC_ECOLI	1	1	1	1	0	1
sp|P05030|PMA1_YEAST	1	1	1	1	1	1
sp|P05042|FUMC_ECOLI	1	1	1	1	1	1
sp|P05055|PNP_ECOLI	1	1	1	1	1	1
sp|P05066|PHR_YEAST	1	1	0	0	0	0
sp|P05150|OTC_YEAST	1	1	0	0	0	0
sp|P05317|RLA0_YEAST	1	1	1	1	1	1
sp|P05319|RLA2_YEAST	1	1	0	0	0	1
sp|P05373|HEM2_YEAST	1	1	1	0	0	1
sp|P05374|CHO2_YEAST	1	1	1	1	1	1
sp|P05375|PLMT_YEAST	1	1	0	0	1	1
sp|P05453|ERF3_YEAST	1	1	0	0	0	1
sp|P05458|PTRA_ECOLI	1	1	1	0	0	1
sp|P05459|PDXB_ECOLI	1	1	1	0	1	1
sp|P05626|ATPF_YEAST	1	1	1	0	0	1
sp|P05694|METE_YEAST	1	1	1	1	1	1
sp|P05737|RL7A_YEAST	1	1	1	1	1	1
sp|P05738|RL9A_YEAST	1	1	1	1	1	1
sp|P05739|RL6B_YEAST	1	1	1	1	1	1
sp|P05740|RL17A_YEAST	1	1	1	1	1	1
sp|P05744|RL33A_YEAST	1	1	1	0	0	1
sp|P05748|RL15A_YEAST	1	1	1	1	1	1
sp|P05749|RL22A_YEAST	1	1	0	0	0	1
sp|P05750|RS3_YEAST	1	1	0	1	1	1
sp|P05756|RS13_YEAST	1	1	1	1	1	1
sp|P05759|RS31_YEAST	1	1	1	0	0	1
sp|P05793|ILVC_ECOLI	1	1	1	0	1	1
sp|P06100|NOT2_YEAST	1	1	0	1	1	1
sp|P06101|CDC37_YEAST	1	1	1	1	1	1
sp|P06102|NOT3_YEAST	1	1	1	1	1	1
sp|P06103|EIF3B_YEAST	1	1	0	0	0	1
sp|P06104|UBC2_YEAST	1	1	0	0	0	0
sp|P06105|SC160_YEAST	1	1	1	1	1	1
sp|P06115|CATT_YEAST	1	1	1	1	1	1
sp|P06168|ILV5_YEAST	1	1	1	1	1	1
sp|P06169|PDC1_YEAST	1	1	0	0	0	1
sp|P06174|HEM4_YEAST	1	1	1	1	1	1
sp|P06182|CCHL_YEAST	1	1	0	0	1	1
sp|P06197|PIS_YEAST	1	1	1	0	0	1
sp|P06208|LEU1_YEAST	1	1	1	1	1	1
sp|P06244|KAPA_YEAST	1	1	1	0	0	1
sp|P06245|KAPB_YEAST	1	1	0	1	0	1
sp|P06610|BTUE_ECOLI	1	1	1	1	1	1
sp|P06612|TOP1_ECOLI	1	1	1	1	0	1
sp|P06634|DED1_YEAST	1	1	1	1	1	1
sp|P06700|SIR2_YEAST	1	1	1	0	0	1
sp|P06701|SIR3_YEAST	1	1	0	0	1	1
sp|P06704|CDC31_YEAST	1	1	1	1	1	1
sp|P06715|GSHR_ECOLI	1	1	1	1	1	1
sp|P06720|AGAL_ECOLI	1	1	1	1	1	1
sp|P06721|METC_ECOLI	1	1	1	1	1	1
sp|P06738|PHSG_YEAST	1	1	1	1	1	1
sp|P06773|DCTD_YEAST	1	1	0	0	1	1
sp|P06774|HAP2_YEAST	1	1	1	0	1	1
sp|P06776|PDE2_YEAST	1	1	1	1	1	1
sp|P06777|RAD1_YEAST	1	0	0	0	1	0
sp|P06778|RAD52_YEAST	1	1	1	1	1	1
sp|P06780|RHO1_YEAST	1	0	0	0	0	0
sp|P06781|RHO2_YEAST	1	1	0	0	0	1
sp|P06782|SNF1_YEAST	1	1	1	0	0	1
sp|P06785|TYSY_YEAST	1	1	1	1	1	1
sp|P06786|TOP2_YEAST	1	1	1	1	0	1
sp|P06787|CALM_YEAST	1	0	0	1	1	1
sp|P06839|RAD3_YEAST	1	1	1	1	0	1
sp|P06843|SPT2_YEAST	1	1	0	0	1	1
sp|P06844|SPT3_YEAST	1	0	0	0	0	0
sp|P06846|EBGR_ECOLI	1	0	0	0	0	1
sp|P06959|ODP2_ECOLI	1	1	1	1	1	1
sp|P06966|DICA_ECOLI	1	0	0	0	0	0
sp|P06968|DUT_ECOLI	1	1	1	1	1	1
sp|P06986|HIS8_ECOLI	1	1	1	1	1	1
sp|P06987|HIS7_ECOLI	1	1	1	1	0	1
sp|P06989|HIS2_ECOLI	1	1	1	1	1	1
sp|P07003|POXB_ECOLI	1	1	1	0	0	1
sp|P07004|PROA_ECOLI	1	1	1	1	1	1
sp|P07012|RF2_ECOLI	1	1	1	1	0	1
sp|P07014|SDHB_ECOLI	1	1	1	1	0	1
sp|P07024|USHA_ECOLI	1	1	1	1	1	1
sp|P07118|SYV_ECOLI	1	1	1	1	1	1
sp|P07143|CY1_YEAST	1	1	1	0	0	1
sp|P07149|FAS1_YEAST	1	1	1	1	0	1
sp|P07170|KAD2_YEAST	1	1	1	1	1	1
sp|P07172|HIS8_YEAST	1	1	1	1	1	1
sp|P07213|TOM70_YEAST	1	1	1	1	1	1
sp|P07236|SYTM_YEAST	1	1	1	0	0	1
sp|P07244|PUR2_YEAST	1	1	1	1	1	1
sp|P07245|C1TC_YEAST	1	1	0	1	1	1
sp|P07246|ADH3_YEAST	1	1	1	1	1	1
sp|P07248|ADR1_YEAST	1	1	1	0	0	1
sp|P07250|IPMK_YEAST	1	0	0	0	1	0
sp|P07251|ATPA_YEAST	1	1	1	1	1	1
sp|P07253|CBP6_YEAST	1	1	0	0	0	1
sp|P07256|QCR1_YEAST	1	1	1	1	1	1
sp|P07257|QCR2_YEAST	1	1	1	1	0	1
sp|P07259|PYR1_YEAST	1	1	1	1	1	1
sp|P07260|IF4E_YEAST	1	1	1	1	1	1
sp|P07261|GCR1_YEAST	1	1	0	0	0	1
sp|P07262|DHE4_YEAST	1	1	1	1	1	1
sp|P07263|SYH_YEAST	1	1	1	1	1	1
sp|P07264|LEUC_YEAST	1	1	0	0	0	1
sp|P07266|MRS1_YEAST	1	0	0	0	0	0
sp|P07267|CARP_YEAST	1	1	0	0	1	1
sp|P07269|PHO2_YEAST	1	1	1	1	1	1
sp|P07273|TFS2_YEAST	1	1	0	0	1	1
sp|P07274|PROF_YEAST	1	1	1	1	1	1
sp|P07275|PUT2_YEAST	1	1	1	0	0	1
sp|P07276|RAD2_YEAST	1	0	0	0	0	0
sp|P07277|ERG12_YEAST	1	1	1	0	0	1
sp|P07278|KAPR_YEAST	1	1	1	1	1	1
sp|P07283|PMM_YEAST	1	1	1	1	1	1
sp|P07284|SYSC_YEAST	1	1	1	1	1	1
sp|P07285|TRPD_YEAST	1	1	1	0	0	1
sp|P07286|GPT_YEAST	1	1	0	0	0	0
sp|P07342|ILVB_YEAST	1	1	1	1	0	1
sp|P07347|ARD1_YEAST	1	1	1	1	1	1
sp|P07395|SYFB_ECOLI	1	1	1	1	0	1
sp|P07464|THGA_ECOLI	1	1	1	1	1	1
sp|P07560|SEC4_YEAST	1	0	0	0	1	0
sp|P07650|TYPH_ECOLI	1	1	1	1	0	1
sp|P07702|LYS2_YEAST	1	1	1	1	0	1
sp|P07703|RPAC1_YEAST	1	1	1	0	0	1
sp|P07806|SYV_YEAST	1	1	1	1	1	1
sp|P07807|DYR_YEAST	1	0	0	0	0	0
sp|P07813|SYL_ECOLI	1	1	1	1	1	1
sp|P07866|LTE1_YEAST	1	0	0	0	0	0
sp|P07913|TDH_ECOLI	1	1	1	1	1	1
sp|P07991|OAT_YEAST	1	1	1	1	1	1
sp|P08004|CHS1_YEAST	1	1	0	0	0	1
sp|P08018|PBS2_YEAST	1	1	1	1	1	1
sp|P08067|UCRI_YEAST	1	1	0	0	0	0
sp|P08178|PUR5_ECOLI	1	1	1	1	0	1
sp|P08179|PUR3_ECOLI	1	1	1	1	1	1
sp|P08192|FOLC_ECOLI	1	1	1	0	0	1
sp|P08194|GLPT_ECOLI	1	1	1	1	1	1
sp|P08200|IDH_ECOLI	1	1	1	1	1	1
sp|P08244|PYRF_ECOLI	1	1	1	0	0	1
sp|P08312|SYFA_ECOLI	1	1	1	1	1	1
sp|P08417|FUMH_YEAST	1	1	1	1	1	1
sp|P08425|SYFM_YEAST	1	1	1	1	0	1
sp|P08456|PSS_YEAST	1	1	0	1	1	1
sp|P08465|MET2_YEAST	1	0	0	0	0	0
sp|P08518|RPB2_YEAST	1	1	1	1	1	1
sp|P08524|ERG20_YEAST	1	1	1	0	0	1
sp|P08536|MET3_YEAST	1	0	0	0	0	0
sp|P08539|GPA1_YEAST	1	0	0	0	0	0
sp|P08550|CVPA_ECOLI	1	0	0	0	0	0
sp|P08566|ARO1_YEAST	1	1	1	1	1	1
sp|P08622|DNAJ_ECOLI	1	0	0	0	0	0
sp|P08678|CYAA_YEAST	1	1	1	0	0	1
sp|P08679|CISY2_YEAST	1	1	1	1	0	1
sp|P08839|PT1_ECOLI	1	1	1	1	1	1
sp|P08957|T1MK_ECOLI	1	1	1	1	1	1
sp|P08964|MYO1_YEAST	1	1	0	0	0	0
sp|P08997|MASY_ECOLI	1	1	1	1	0	1
sp|P09029|PURK_ECOLI	1	1	1	1	1	1
sp|P09030|EX3_ECOLI	1	1	1	0	0	1
sp|P09032|EI2BG_YEAST	1	1	1	0	0	1
sp|P09064|IF2B_YEAST	1	0	0	1	1	0
sp|P09127|HEMX_ECOLI	1	1	0	0	0	0
sp|P09147|GALE_ECOLI	1	1	1	0	1	1
sp|P09151|LEU1_ECOLI	1	0	0	0	0	1
sp|P09158|SPEE_ECOLI	1	1	1	0	1	1
sp|P09232|PRTB_YEAST	1	0	0	0	0	0
sp|P09323|PTW3C_ECOLI	1	1	1	1	1	1
sp|P09368|PUT1_YEAST	1	1	0	1	1	1
sp|P09372|GRPE_ECOLI	1	1	1	1	1	1
sp|P09373|PFLB_ECOLI	1	1	1	1	1	1
sp|P09394|GLPQ_ECOLI	1	1	1	1	1	1
sp|P09424|MTLD_ECOLI	1	1	1	0	1	1
sp|P09435|HSP73_YEAST	1	0	0	0	0	0
sp|P09436|SYIC_YEAST	1	1	1	1	1	1
sp|P09440|C1TM_YEAST	1	1	1	0	1	1
sp|P09457|ATPO_YEAST	1	1	1	0	1	1
sp|P09546|PUTA_ECOLI	1	1	1	1	0	1
sp|P09547|SWI1_YEAST	1	1	0	0	1	1
sp|P09551|ARGT_ECOLI	1	1	1	1	1	1
sp|P09620|KEX1_YEAST	1	1	1	1	1	1
sp|P09624|DLDH_YEAST	1	1	1	0	0	1
sp|P09733|TBA1_YEAST	1	1	1	1	1	1
sp|P09734|TBA3_YEAST	1	1	1	1	1	1
sp|P09798|CDC16_YEAST	1	1	1	1	0	1
sp|P09831|GLTB_ECOLI	1	1	1	1	0	1
sp|P09832|GLTD_ECOLI	1	1	1	1	1	1
sp|P09880|TRNL_YEAST	1	1	1	1	1	1
sp|P09938|RIR2_YEAST	1	1	1	1	1	1
sp|P09950|HEM1_YEAST	1	1	1	1	1	1
sp|P09959|SWI6_YEAST	1	1	0	0	0	0
sp|P0A698|UVRA_ECOLI	1	1	1	1	1	1
sp|P0A6A3|ACKA_ECOLI	1	1	1	1	0	1
sp|P0A6A8|ACP_ECOLI	1	1	1	1	1	1
sp|P0A6B4|ALR1_ECOLI	1	0	0	0	0	0
sp|P0A6B7|ISCS_ECOLI	1	1	1	1	1	1
sp|P0A6D3|AROA_ECOLI	1	0	1	1	0	1
sp|P0A6E4|ASSY_ECOLI	1	1	1	1	0	1
sp|P0A6E6|ATPE_ECOLI	1	1	1	1	1	1
sp|P0A6F1|CARA_ECOLI	1	1	1	1	1	1
sp|P0A6F3|GLPK_ECOLI	1	1	1	1	1	1
sp|P0A6F5|CH60_ECOLI	1	1	1	1	1	1
sp|P0A6F9|CH10_ECOLI	1	1	1	1	1	1
sp|P0A6G7|CLPP_ECOLI	1	1	1	1	1	1
sp|P0A6H1|CLPX_ECOLI	1	0	0	0	0	0
sp|P0A6H5|HSLU_ECOLI	1	1	1	1	1	1
sp|P0A6I0|KCY_ECOLI	1	1	1	1	0	1
sp|P0A6I3|COAA_ECOLI	1	1	1	1	1	1
sp|P0A6J5|DADA_ECOLI	1	1	0	0	0	0
sp|P0A6J8|DDLA_ECOLI	1	1	1	1	1	1
sp|P0A6K1|DAPF_ECOLI	1	1	1	1	1	1
sp|P0A6K3|DEF_ECOLI	1	0	1	0	0	1
sp|P0A6K6|DEOB_ECOLI	1	1	1	1	1	1
sp|P0A6L0|DEOC_ECOLI	1	1	1	0	1	1
sp|P0A6L2|DAPA_ECOLI	1	1	1	1	1	1
sp|P0A6L4|NANA_ECOLI	1	1	1	1	1	1
sp|P0A6L9|HSCB_ECOLI	1	1	0	0	0	0
sp|P0A6M8|EFG_ECOLI	1	1	1	1	1	1
sp|P0A6N4|EFP_ECOLI	1	1	1	1	1	1
sp|P0A6N8|EFPL_ECOLI	1	1	1	1	0	1
sp|P0A6P1|EFTS_ECOLI	1	1	1	1	1	1
sp|P0A6P5|DER_ECOLI	1	1	1	1	0	1
sp|P0A6P7|ENGB_ECOLI	1	1	1	1	1	1
sp|P0A6P9|ENO_ECOLI	1	1	1	1	1	1
sp|P0A6Q3|FABA_ECOLI	1	1	1	1	1	1
sp|P0A6R0|FABH_ECOLI	1	1	1	1	1	1
sp|P0A6S7|GPDA_ECOLI	1	1	1	1	1	1
sp|P0A6T1|G6PI_ECOLI	1	1	1	1	0	1
sp|P0A6T3|GAL1_ECOLI	1	1	1	1	0	1
sp|P0A6T5|GCH1_ECOLI	1	1	1	0	1	1
sp|P0A6V1|GLGC_ECOLI	1	1	1	1	0	1
sp|P0A6V8|GLK_ECOLI	1	1	1	0	0	1
sp|P0A6W5|GREA_ECOLI	1	1	1	1	1	1
sp|P0A6W9|GSH1_ECOLI	1	1	1	0	0	1
sp|P0A6X3|HFQ_ECOLI	1	0	0	0	0	1
sp|P0A6X7|IHFA_ECOLI	1	1	1	1	1	1
sp|P0A6Y1|IHFB_ECOLI	1	1	1	1	1	1
sp|P0A6Y5|HSLO_ECOLI	1	0	1	1	0	1
sp|P0A6Y8|DNAK_ECOLI	1	1	1	0	0	1
sp|P0A6Z1|HSCA_ECOLI	1	1	1	1	1	1
sp|P0A6Z3|HTPG_ECOLI	1	1	1	1	1	1
sp|P0A705|IF2_ECOLI	1	1	1	1	1	1
sp|P0A707|IF3_ECOLI	1	1	1	1	1	1
sp|P0A715|KDSA_ECOLI	1	1	1	1	1	1
sp|P0A717|KPRS_ECOLI	1	1	1	1	1	1
sp|P0A722|LPXA_ECOLI	1	0	0	0	0	1
sp|P0A734|MINE_ECOLI	1	1	1	1	0	1
sp|P0A738|MOAC_ECOLI	1	0	0	0	0	1
sp|P0A744|MSRA_ECOLI	1	1	1	1	1	1
sp|P0A746|MSRB_ECOLI	1	1	1	1	1	1
sp|P0A749|MURA_ECOLI	1	1	1	1	0	1
sp|P0A759|NAGB_ECOLI	1	1	1	0	0	1
sp|P0A761|NANE_ECOLI	1	1	1	1	1	1
sp|P0A763|NDK_ECOLI	1	1	1	1	1	1
sp|P0A786|PYRB_ECOLI	1	1	1	1	1	1
sp|P0A794|PDXJ_ECOLI	1	1	1	1	1	1
sp|P0A796|PFKA_ECOLI	1	1	1	1	1	1
sp|P0A799|PGK_ECOLI	1	1	1	1	1	1
sp|P0A7A9|IPYR_ECOLI	1	1	1	1	0	1
sp|P0A7B1|PPK1_ECOLI	1	1	1	0	0	1
sp|P0A7B3|NADK_ECOLI	1	0	0	0	0	1
sp|P0A7B5|PROB_ECOLI	1	0	1	0	1	1
sp|P0A7B8|HSLV_ECOLI	1	0	0	0	0	0
sp|P0A7C6|PEPE_ECOLI	1	1	1	1	1	1
sp|P0A7D1|PTH_ECOLI	1	1	1	1	1	1
sp|P0A7D4|PURA_ECOLI	1	1	1	1	1	1
sp|P0A7D7|PUR7_ECOLI	1	1	1	1	1	1
sp|P0A7E5|PYRG_ECOLI	1	1	1	0	0	1
sp|P0A7E9|PYRH_ECOLI	1	1	1	0	0	1
sp|P0A7F3|PYRI_ECOLI	1	1	1	1	0	1
sp|P0A7F6|SPED_ECOLI	1	1	1	1	1	1
sp|P0A7G2|RBFA_ECOLI	1	1	1	1	1	1
sp|P0A7G6|RECA_ECOLI	1	1	0	1	0	1
sp|P0A7I0|RF1_ECOLI	1	1	1	1	1	1
sp|P0A7I4|RF3_ECOLI	1	1	1	1	1	1
sp|P0A7J3|RL10_ECOLI	1	1	1	1	1	1
sp|P0A7J7|RL11_ECOLI	1	1	1	1	1	1
sp|P0A7K2|RL7_ECOLI	1	1	1	1	1	1
sp|P0A7K6|RL19_ECOLI	1	1	1	1	1	1
sp|P0A7L0|RL1_ECOLI	1	1	1	1	1	1
sp|P0A7L8|RL27_ECOLI	1	1	1	1	0	1
sp|P0A7M2|RL28_ECOLI	1	1	1	1	0	1
sp|P0A7M6|RL29_ECOLI	1	1	1	1	1	1
sp|P0A7M9|RL31_ECOLI	1	1	1	1	1	1
sp|P0A7N9|RL33_ECOLI	1	1	1	1	1	1
sp|P0A7R1|RL9_ECOLI	1	1	1	1	1	1
sp|P0A7R5|RS10_ECOLI	1	1	1	1	1	1
sp|P0A7R9|RS11_ECOLI	1	1	1	1	1	1
sp|P0A7S3|RS12_ECOLI	1	1	1	1	1	1
sp|P0A7S9|RS13_ECOLI	1	1	1	1	1	1
sp|P0A7T3|RS16_ECOLI	1	1	1	1	1	1
sp|P0A7T7|RS18_ECOLI	1	1	1	1	1	1
sp|P0A7U3|RS19_ECOLI	1	1	1	1	1	1
sp|P0A7V0|RS2_ECOLI	1	1	1	1	1	1
sp|P0A7V3|RS3_ECOLI	1	1	1	1	0	1
sp|P0A7V8|RS4_ECOLI	1	1	1	1	1	1
sp|P0A7W1|RS5_ECOLI	1	1	1	1	1	1
sp|P0A7W7|RS8_ECOLI	1	1	1	1	1	1
sp|P0A7X3|RS9_ECOLI	1	1	1	1	1	1
sp|P0A7X6|RIMM_ECOLI	1	1	1	0	1	1
sp|P0A7Y0|RNC_ECOLI	1	1	1	1	1	1
sp|P0A7Z0|RPIA_ECOLI	1	1	1	1	1	1
sp|P0A7Z4|RPOA_ECOLI	1	1	1	1	1	1
sp|P0A800|RPOZ_ECOLI	1	1	1	1	1	1
sp|P0A805|RRF_ECOLI	1	1	1	1	1	1
sp|P0A817|METK_ECOLI	1	1	1	1	0	1
sp|P0A825|GLYA_ECOLI	1	1	1	1	1	1
sp|P0A836|SUCC_ECOLI	1	1	1	1	1	1
sp|P0A840|SURE_ECOLI	1	1	1	0	0	1
sp|P0A847|TGT_ECOLI	1	1	1	1	0	1
sp|P0A850|TIG_ECOLI	1	1	1	1	1	1
sp|P0A853|TNAA_ECOLI	1	1	1	1	1	1
sp|P0A855|TOLB_ECOLI	1	1	1	1	0	1
sp|P0A858|TPIS_ECOLI	1	1	1	1	1	1
sp|P0A862|TPX_ECOLI	1	1	1	1	1	1
sp|P0A867|TALA_ECOLI	1	1	1	1	0	1
sp|P0A870|TALB_ECOLI	1	1	1	1	1	1
sp|P0A877|TRPA_ECOLI	1	1	1	0	1	1
sp|P0A879|TRPB_ECOLI	1	1	1	1	0	1
sp|P0A881|TRPR_ECOLI	1	0	0	0	0	1
sp|P0A884|TYSY_ECOLI	1	1	1	0	0	1
sp|P0A8A0|YEBC_ECOLI	1	1	1	0	0	1
sp|P0A8A2|YEEN_ECOLI	1	1	1	0	0	1
sp|P0A8B5|YBAB_ECOLI	1	1	1	1	1	1
sp|P0A8C4|YGFB_ECOLI	1	1	1	1	1	1
sp|P0A8D0|NRDR_ECOLI	1	1	1	1	0	1
sp|P0A8D6|YMDB_ECOLI	1	0	1	0	0	1
sp|P0A8E1|YCFP_ECOLI	1	1	1	1	1	1
sp|P0A8E5|YACL_ECOLI	1	1	1	1	1	1
sp|P0A8E7|YAJQ_ECOLI	1	1	1	1	1	1
sp|P0A8F0|UPP_ECOLI	1	1	1	1	1	1
sp|P0A8G3|UXAC_ECOLI	1	1	1	1	1	1
sp|P0A8G6|NQOR_ECOLI	1	1	1	1	1	1
sp|P0A8G9|EX7S_ECOLI	1	0	0	0	0	0
sp|P0A8H6|YIHI_ECOLI	1	1	1	1	1	1
sp|P0A8I3|YAAA_ECOLI	1	1	0	0	1	1
sp|P0A8I5|TRMB_ECOLI	1	1	1	1	1	1
sp|P0A8J4|YBED_ECOLI	1	1	1	1	1	1
sp|P0A8J8|RHLB_ECOLI	1	1	1	1	0	1
sp|P0A8K5|YAEP_ECOLI	1	1	1	1	0	1
sp|P0A8L1|SYS_ECOLI	1	1	1	1	1	1
sp|P0A8M0|SYN_ECOLI	1	1	1	1	1	1
sp|P0A8M3|SYT_ECOLI	1	1	1	0	1	1
sp|P0A8M6|YEEX_ECOLI	1	1	1	1	1	1
sp|P0A8N0|MATP_ECOLI	1	0	0	0	0	0
sp|P0A8N3|SYK1_ECOLI	1	1	1	1	1	1
sp|P0A8N5|SYK2_ECOLI	1	1	1	1	0	1
sp|P0A8P3|FETP_ECOLI	1	1	1	1	0	1
sp|P0A8R0|RRAA_ECOLI	1	0	0	0	0	1
sp|P0A8S1|ARGP_ECOLI	1	1	1	1	1	1
sp|P0A8T1|PRMA_ECOLI	1	0	1	1	0	1
sp|P0A8T7|RPOC_ECOLI	1	1	1	1	1	1
sp|P0A8U6|METJ_ECOLI	1	1	0	1	1	1
sp|P0A8V0|RBN_ECOLI	1	0	0	0	0	1
sp|P0A8V2|RPOB_ECOLI	1	1	1	1	1	1
sp|P0A8W2|SLYA_ECOLI	1	1	1	0	1	1
sp|P0A8W8|YFBU_ECOLI	1	1	1	1	0	1
sp|P0A8X0|YJGA_ECOLI	1	1	1	1	1	1
sp|P0A8X2|YCEI_ECOLI	1	1	1	0	1	1
sp|P0A8Y3|YIHX_ECOLI	1	1	1	0	0	1
sp|P0A8Y5|YIDA_ECOLI	1	1	0	1	0	1
sp|P0A8Z0|YCIA_ECOLI	1	0	1	1	1	1
sp|P0A910|OMPA_ECOLI	1	1	1	1	1	1
sp|P0A940|BAMA_ECOLI	1	0	0	0	0	0
sp|P0A951|ATDA_ECOLI	1	1	0	0	0	0
sp|P0A953|FABB_ECOLI	1	1	1	1	1	1
sp|P0A955|ALKH_ECOLI	1	1	1	1	1	1
sp|P0A962|ASPG1_ECOLI	1	1	1	1	1	1
sp|P0A972|CSPE_ECOLI	1	1	0	1	1	1
sp|P0A988|DPO3B_ECOLI	1	1	1	1	0	1
sp|P0A991|ALF1_ECOLI	1	1	1	1	0	1
sp|P0A993|F16PA_ECOLI	1	1	1	1	1	1
sp|P0A9A6|FTSZ_ECOLI	1	1	1	1	0	1
sp|P0A9A9|FUR_ECOLI	1	1	1	1	1	1
sp|P0A9B2|G3P1_ECOLI	1	1	1	1	1	1
sp|P0A9C0|GLPA_ECOLI	1	1	0	0	0	1
sp|P0A9C3|GALM_ECOLI	1	1	1	0	0	1
sp|P0A9C5|GLN1B_ECOLI	1	1	1	1	0	1
sp|P0A9D2|GSTA_ECOLI	1	1	1	1	0	1
sp|P0A9D4|CYSE_ECOLI	1	1	1	1	1	1
sp|P0A9D8|DAPD_ECOLI	1	1	1	1	1	1
sp|P0A9F3|CYSB_ECOLI	1	1	1	0	0	1
sp|P0A9G6|ACEA_ECOLI	1	1	1	1	1	1
sp|P0A9G8|MODE_ECOLI	1	0	0	0	0	0
sp|P0A9H7|CFA_ECOLI	1	0	0	0	0	0
sp|P0A9J0|RNG_ECOLI	1	1	1	1	0	1
sp|P0A9J6|RBSK_ECOLI	1	1	1	1	1	1
sp|P0A9J8|CMPDT_ECOLI	1	1	1	1	0	1
sp|P0A9K3|PHOL_ECOLI	1	1	1	1	1	1
sp|P0A9K9|SLYD_ECOLI	1	1	1	1	1	1
sp|P0A9L3|FKBB_ECOLI	1	1	1	1	0	1
sp|P0A9L5|PPIC_ECOLI	1	1	1	1	1	1
sp|P0A9L8|P5CR_ECOLI	1	1	1	1	1	1
sp|P0A9M0|LON_ECOLI	1	1	1	1	0	1
sp|P0A9M2|HPRT_ECOLI	1	1	1	1	1	1
sp|P0A9M5|XGPT_ECOLI	1	1	1	1	1	1
sp|P0A9M8|PTA_ECOLI	1	1	1	1	1	1
sp|P0A9N4|PFLA_ECOLI	1	1	1	1	0	1
sp|P0A9P0|DLDH_ECOLI	1	1	1	1	1	1
sp|P0A9P4|TRXB_ECOLI	1	1	1	1	1	1
sp|P0A9Q1|ARCA_ECOLI	1	1	1	1	0	1
sp|P0A9Q5|ACCD_ECOLI	1	1	1	1	1	1
sp|P0A9Q7|ADHE_ECOLI	1	1	1	1	0	1
sp|P0A9Q9|DHAS_ECOLI	1	1	1	1	1	1
sp|P0A9R4|FER_ECOLI	1	1	1	1	1	1
sp|P0A9S1|FUCO_ECOLI	1	1	1	0	0	1
sp|P0A9T0|SERA_ECOLI	1	1	1	1	1	1
sp|P0A9T4|TAS_ECOLI	1	1	1	1	0	1
sp|P0A9W3|ETTA_ECOLI	1	1	1	0	0	1
sp|P0A9Y6|CSPC_ECOLI	1	1	1	1	1	1
sp|P0A9Z1|GLNB_ECOLI	1	1	1	1	1	1
sp|P0AA04|PTHP_ECOLI	1	1	1	1	1	1
sp|P0AA10|RL13_ECOLI	1	1	1	1	1	1
sp|P0AA16|OMPR_ECOLI	1	1	1	0	1	1
sp|P0AA25|THIO_ECOLI	1	1	1	1	1	1
sp|P0AA39|RLUC_ECOLI	1	1	1	0	0	1
sp|P0AA43|RSUA_ECOLI	1	0	0	0	0	0
sp|P0AAB4|UBID_ECOLI	1	1	1	1	1	1
sp|P0AAB6|GALF_ECOLI	1	1	1	1	0	1
sp|P0AAB8|USPD_ECOLI	1	1	1	1	0	1
sp|P0AAC0|USPE_ECOLI	1	1	1	0	0	1
sp|P0AAG8|MGLA_ECOLI	1	0	0	0	0	0
sp|P0AAI3|FTSH_ECOLI	1	1	1	1	1	1
sp|P0AAI5|FABF_ECOLI	1	1	1	1	0	1
sp|P0AAI9|FABD_ECOLI	1	1	1	1	0	1
sp|P0AAN5|YAIA_ECOLI	1	1	1	1	0	1
sp|P0AAP3|FRMR_ECOLI	1	1	1	1	1	1
sp|P0AAQ2|YAJD_ECOLI	1	1	1	1	0	1
sp|P0AAT9|YBEL_ECOLI	1	1	1	1	0	1
sp|P0AAV6|YBGS_ECOLI	1	1	1	1	1	1
sp|P0AAX8|YBIS_ECOLI	1	1	1	1	1	1
sp|P0AB24|EFEO_ECOLI	1	1	1	0	0	1
sp|P0AB28|YCED_ECOLI	1	1	1	1	1	1
sp|P0AB52|YCHN_ECOLI	1	1	1	1	0	1
sp|P0AB55|YCII_ECOLI	1	1	1	1	1	1
sp|P0AB61|YCIN_ECOLI	1	1	1	1	1	1
sp|P0AB65|ACYP_ECOLI	1	0	0	0	0	1
sp|P0AB71|ALF_ECOLI	1	1	1	1	1	1
sp|P0AB77|KBL_ECOLI	1	1	1	0	0	1
sp|P0AB80|ILVE_ECOLI	1	1	1	0	0	1
sp|P0AB83|END3_ECOLI	1	0	0	0	0	0
sp|P0AB89|PUR8_ECOLI	1	1	1	1	0	1
sp|P0AB91|AROG_ECOLI	1	1	1	0	0	1
sp|P0ABA4|ATPD_ECOLI	1	1	1	1	0	1
sp|P0ABA6|ATPG_ECOLI	1	1	1	1	1	1
sp|P0ABB0|ATPA_ECOLI	1	1	1	1	1	1
sp|P0ABB4|ATPB_ECOLI	1	1	1	1	1	1
sp|P0ABC7|HFLK_ECOLI	1	0	0	0	0	0
sp|P0ABD3|BFR_ECOLI	1	0	0	0	0	1
sp|P0ABD5|ACCA_ECOLI	1	1	1	1	1	1
sp|P0ABD8|BCCP_ECOLI	1	1	1	1	1	1
sp|P0ABE2|BOLA_ECOLI	1	1	1	1	1	1
sp|P0ABF1|PCNB_ECOLI	1	1	1	1	1	1
sp|P0ABF6|CDD_ECOLI	1	1	1	1	0	1
sp|P0ABH7|CISY_ECOLI	1	1	1	1	1	1
sp|P0ABH9|CLPA_ECOLI	1	1	1	1	0	1
sp|P0ABJ1|CYOA_ECOLI	1	0	0	0	1	1
sp|P0ABK5|CYSK_ECOLI	1	1	1	1	0	1
sp|P0ABP8|DEOD_ECOLI	1	1	1	1	1	1
sp|P0ABQ0|COABC_ECOLI	1	1	0	0	0	0
sp|P0ABQ2|GARR_ECOLI	1	1	1	1	1	1
sp|P0ABQ4|DYR_ECOLI	1	1	1	1	1	1
sp|P0ABS1|DKSA_ECOLI	1	1	1	1	1	1
sp|P0ABT2|DPS_ECOLI	1	1	1	1	1	1
sp|P0ABU0|MENB_ECOLI	1	1	1	1	1	1
sp|P0ABU2|YCHF_ECOLI	1	1	1	1	1	1
sp|P0ABU5|ELBB_ECOLI	1	1	1	1	1	1
sp|P0ABZ6|SURA_ECOLI	1	1	1	1	1	1
sp|P0AC13|DHPS_ECOLI	1	1	1	0	0	1
sp|P0AC19|FOLX_ECOLI	1	1	1	1	0	1
sp|P0AC33|FUMA_ECOLI	1	1	1	1	1	1
sp|P0AC38|ASPA_ECOLI	1	1	1	1	1	1
sp|P0AC41|SDHA_ECOLI	1	1	1	1	1	1
sp|P0AC47|FRDB_ECOLI	1	1	0	0	0	0
sp|P0AC53|G6PD_ECOLI	1	1	1	1	0	1
sp|P0AC59|GLRX2_ECOLI	1	1	1	1	0	1
sp|P0AC62|GLRX3_ECOLI	1	1	1	1	1	1
sp|P0AC69|GLRX4_ECOLI	1	1	1	1	1	1
sp|P0AC84|GLO2_ECOLI	1	1	1	1	1	1
sp|P0AC86|PHSG_ECOLI	1	1	0	0	0	0
sp|P0ACA1|YIBF_ECOLI	1	1	1	1	1	1
sp|P0ACA3|SSPA_ECOLI	1	1	1	0	1	1
sp|P0ACA7|GSTB_ECOLI	1	1	1	1	0	1
sp|P0ACB2|HEM2_ECOLI	1	1	1	0	0	1
sp|P0ACC3|ERPA_ECOLI	1	0	0	0	0	0
sp|P0ACC7|GLMU_ECOLI	1	1	1	1	1	1
sp|P0ACD4|ISCU_ECOLI	1	1	1	1	0	1
sp|P0ACE7|HINT_ECOLI	1	1	1	1	1	1
sp|P0ACF0|DBHA_ECOLI	1	1	1	1	1	1
sp|P0ACF4|DBHB_ECOLI	1	1	1	1	1	1
sp|P0ACF8|HNS_ECOLI	1	1	1	1	1	1
sp|P0ACI0|ROB_ECOLI	1	1	1	1	1	1
sp|P0ACI6|ASNC_ECOLI	1	1	1	1	1	1
sp|P0ACJ0|LRP_ECOLI	1	1	1	1	1	1
sp|P0ACJ5|DECR_ECOLI	1	0	0	0	0	0
sp|P0ACJ8|CRP_ECOLI	1	1	1	1	1	1
sp|P0ACP5|GNTR_ECOLI	1	1	0	0	0	0
sp|P0ACQ4|OXYR_ECOLI	1	1	1	1	1	1
sp|P0ACR4|YEIE_ECOLI	1	0	0	0	0	0
sp|P0ACU7|YJDC_ECOLI	1	1	0	0	0	0
sp|P0ACV6|MPAA_ECOLI	1	1	1	0	0	1
sp|P0ACX3|YDHR_ECOLI	1	1	1	1	1	1
sp|P0ACY1|YDJA_ECOLI	1	1	1	1	1	1
sp|P0ACY3|YEAG_ECOLI	1	1	1	0	1	1
sp|P0AD05|YECA_ECOLI	1	1	1	1	1	1
sp|P0AD12|YEEZ_ECOLI	1	1	0	0	0	0
sp|P0AD24|YEJL_ECOLI	1	0	0	0	0	0
sp|P0AD33|YFCZ_ECOLI	1	0	0	0	0	1
sp|P0AD49|YFIA_ECOLI	1	1	1	1	1	1
sp|P0AD57|ISPB_ECOLI	1	0	0	0	0	1
sp|P0AD59|IVY_ECOLI	1	0	0	0	0	1
sp|P0AD61|KPYK1_ECOLI	1	1	1	1	1	1
sp|P0AD96|LIVJ_ECOLI	1	1	1	0	0	1
sp|P0ADB1|OSME_ECOLI	1	0	0	0	0	0
sp|P0ADB7|ECNB_ECOLI	1	1	1	1	1	1
sp|P0ADE8|YGFZ_ECOLI	1	1	1	1	1	1
sp|P0ADF8|ILVN_ECOLI	1	0	0	0	0	1
sp|P0ADG4|SUHB_ECOLI	1	1	1	1	1	1
sp|P0ADG7|IMDH_ECOLI	1	1	1	1	1	1
sp|P0ADK8|YIBL_ECOLI	1	0	0	0	0	0
sp|P0ADN2|YIFE_ECOLI	1	1	1	1	1	1
sp|P0ADP0|YIGB_ECOLI	1	1	1	1	0	1
sp|P0ADP9|YIHD_ECOLI	1	1	1	1	0	1
sp|P0ADQ2|FABY_ECOLI	1	1	1	1	0	1
sp|P0ADS2|ZAPA_ECOLI	1	1	1	1	1	1
sp|P0ADS6|YGGE_ECOLI	1	1	1	1	1	1
sp|P0ADT5|YGIC_ECOLI	1	1	1	1	1	1
sp|P0ADU5|YGIW_ECOLI	1	1	1	1	0	1
sp|P0ADV7|MLAC_ECOLI	1	1	1	1	0	1
sp|P0ADX7|YHHA_ECOLI	1	1	1	1	1	1
sp|P0ADY3|RL14_ECOLI	1	1	1	1	1	1
sp|P0ADY7|RL16_ECOLI	1	1	1	1	1	1
sp|P0ADZ4|RS15_ECOLI	1	1	1	1	1	1
sp|P0AE08|AHPC_ECOLI	1	1	1	1	1	1
sp|P0AE12|AMN_ECOLI	1	1	1	1	0	1
sp|P0AE18|MAP1_ECOLI	1	1	1	1	0	1
sp|P0AE22|APHA_ECOLI	1	1	1	1	0	1
sp|P0AE37|ASTA_ECOLI	1	1	1	1	1	1
sp|P0AE45|PAEA_ECOLI	1	0	0	0	0	0
sp|P0AE52|BCP_ECOLI	1	1	1	1	1	1
sp|P0AE63|CHAB_ECOLI	1	1	1	1	1	1
sp|P0AE67|CHEY_ECOLI	1	0	1	1	0	1
sp|P0AE88|CPXR_ECOLI	1	1	1	1	0	1
sp|P0AED0|USPA_ECOLI	1	1	1	1	1	1
sp|P0AED7|DAPE_ECOLI	1	1	1	1	1	1
sp|P0AEE5|MGLB_ECOLI	1	1	1	1	1	1
sp|P0AEG4|DSBA_ECOLI	1	1	1	1	0	1
sp|P0AEH5|ELAB_ECOLI	1	1	1	0	1	1
sp|P0AEK2|FABG_ECOLI	1	1	1	1	1	1
sp|P0AEK4|FABI_ECOLI	1	1	1	1	0	1
sp|P0AEM0|FKBX_ECOLI	1	1	1	1	1	1
sp|P0AEM4|FLGM_ECOLI	1	1	1	1	1	1
sp|P0AEM6|FLIA_ECOLI	1	0	0	0	0	1
sp|P0AEM9|TCYJ_ECOLI	1	1	1	1	1	1
sp|P0AEN1|FRE_ECOLI	1	1	1	1	1	1
sp|P0AEP3|GALU_ECOLI	1	1	1	0	0	1
sp|P0AEQ1|GLCG_ECOLI	1	1	1	1	1	1
sp|P0AEQ3|GLNH_ECOLI	1	1	1	1	1	1
sp|P0AER0|GLPF_ECOLI	1	0	0	0	0	0
sp|P0AES0|GSP_ECOLI	1	1	1	1	0	1
sp|P0AES2|GUDD_ECOLI	1	0	0	0	0	1
sp|P0AES4|GYRA_ECOLI	1	1	1	1	1	1
sp|P0AES6|GYRB_ECOLI	1	1	1	1	1	1
sp|P0AES9|HDEA_ECOLI	1	1	1	1	0	1
sp|P0AET2|HDEB_ECOLI	1	1	1	1	0	1
sp|P0AET8|HDHA_ECOLI	1	1	1	1	1	1
sp|P0AEU0|HISJ_ECOLI	1	1	1	1	1	1
sp|P0AEU7|SKP_ECOLI	1	1	1	1	1	1
sp|P0AEW6|INGK_ECOLI	1	1	1	1	1	1
sp|P0AEW9|K1PF_ECOLI	1	1	1	1	1	1
sp|P0AEX5|KPPR_ECOLI	1	1	1	1	1	1
sp|P0AEX9|MALE_ECOLI	1	1	1	1	1	1
sp|P0AEY5|MDAB_ECOLI	1	0	0	0	0	0
sp|P0AEZ3|MIND_ECOLI	1	1	1	0	0	1
sp|P0AEZ9|MOAB_ECOLI	1	1	1	0	1	1
sp|P0AF03|MOG_ECOLI	1	1	1	1	0	1
sp|P0AF08|APBC_ECOLI	1	1	1	0	0	1
sp|P0AF12|MTNN_ECOLI	1	1	1	1	1	1
sp|P0AF18|NAGA_ECOLI	1	1	1	1	0	1
sp|P0AF20|NAGC_ECOLI	1	1	1	1	0	1
sp|P0AF28|NARL_ECOLI	1	1	0	0	0	1
sp|P0AF36|ZAPB_ECOLI	1	1	1	1	1	1
sp|P0AF48|YJBQ_ECOLI	1	0	0	0	0	0
sp|P0AF50|YJBR_ECOLI	1	1	1	1	1	1
sp|P0AF67|TSAE_ECOLI	1	0	0	0	0	0
sp|P0AF90|RRAB_ECOLI	1	1	1	1	1	1
sp|P0AF93|RIDA_ECOLI	1	1	1	1	1	1
sp|P0AF96|TABA_ECOLI	1	1	1	1	0	1
sp|P0AFC7|NUOB_ECOLI	1	1	1	1	1	1
sp|P0AFD1|NUOE_ECOLI	1	1	1	1	1	1
sp|P0AFF6|NUSA_ECOLI	1	1	1	1	1	1
sp|P0AFG0|NUSG_ECOLI	1	1	1	1	0	1
sp|P0AFG3|ODO1_ECOLI	1	1	1	1	0	1
sp|P0AFG6|ODO2_ECOLI	1	1	1	1	1	1
sp|P0AFG8|ODP1_ECOLI	1	1	1	1	0	1
sp|P0AFH8|OSMY_ECOLI	1	1	1	1	1	1
sp|P0AFI0|OXC_ECOLI	1	0	0	0	0	0
sp|P0AFI2|PARC_ECOLI	1	1	1	0	1	1
sp|P0AFI7|PDXH_ECOLI	1	1	1	1	1	1
sp|P0AFJ1|YJDM_ECOLI	1	1	1	1	1	1
sp|P0AFK0|PMBA_ECOLI	1	1	1	0	0	1
sp|P0AFK9|POTD_ECOLI	1	1	1	1	1	1
sp|P0AFL3|PPIA_ECOLI	1	1	1	1	0	1
sp|P0AFM4|PSIF_ECOLI	1	1	1	1	1	1
sp|P0AFP6|GCH1L_ECOLI	1	1	1	1	0	1
sp|P0AFS5|TQSA_ECOLI	1	0	0	0	0	0
sp|P0AFU8|RISA_ECOLI	1	1	1	0	0	1
sp|P0AFW4|RNK_ECOLI	1	1	1	1	1	1
sp|P0AFW8|ROF_ECOLI	1	0	0	0	0	0
sp|P0AFX4|RSD_ECOLI	1	1	1	1	0	1
sp|P0AG03|UBIX_ECOLI	1	0	0	0	0	0
sp|P0AG07|RPE_ECOLI	1	1	1	1	1	1
sp|P0AG16|PUR1_ECOLI	1	1	1	1	1	1
sp|P0AG18|PURE_ECOLI	1	0	0	1	1	0
sp|P0AG30|RHO_ECOLI	1	1	1	1	1	1
sp|P0AG44|RL17_ECOLI	1	1	1	1	1	1
sp|P0AG48|RL21_ECOLI	1	1	1	1	1	1
sp|P0AG55|RL6_ECOLI	1	1	1	1	1	1
sp|P0AG59|RS14_ECOLI	1	1	1	1	1	1
sp|P0AG63|RS17_ECOLI	1	1	1	1	1	1
sp|P0AG67|RS1_ECOLI	1	1	1	1	1	1
sp|P0AG80|UGPB_ECOLI	1	1	1	1	1	1
sp|P0AG82|PSTS_ECOLI	1	1	1	1	0	1
sp|P0AG84|YGHA_ECOLI	1	1	0	0	0	1
sp|P0AG86|SECB_ECOLI	1	1	1	1	1	1
sp|P0AGB0|SERB_ECOLI	1	1	0	0	0	1
sp|P0AGC5|MLTF_ECOLI	1	0	0	0	0	0
sp|P0AGD1|SODC_ECOLI	1	1	1	1	1	1
sp|P0AGD3|SODF_ECOLI	1	1	1	1	1	1
sp|P0AGE0|SSB_ECOLI	1	1	1	1	1	1
sp|P0AGE6|CHRR_ECOLI	1	1	1	1	0	1
sp|P0AGE9|SUCD_ECOLI	1	1	1	1	1	1
sp|P0AGG0|THIL_ECOLI	1	1	0	0	0	0
sp|P0AGJ5|YFIF_ECOLI	1	1	1	0	0	1
sp|P0AGJ9|SYY_ECOLI	1	1	1	1	1	1
sp|P0AGK4|YHBY_ECOLI	1	1	1	1	1	1
sp|P0C018|RL18_ECOLI	1	1	1	1	1	1
sp|P0C0L2|OSMC_ECOLI	1	1	1	1	1	1
sp|P0C0L9|ISCX_ECOLI	1	1	1	1	0	1
sp|P0C0V0|DEGP_ECOLI	1	1	1	1	1	1
sp|P0C0V8|RS21A_YEAST	1	0	0	0	0	0
sp|P0C0W1|RS22A_YEAST	1	0	0	1	1	1
sp|P0C2H6|RL27A_YEAST	1	1	1	1	0	1
sp|P0C2H8|RL31A_YEAST	1	1	1	1	1	1
sp|P0C2H9|RL31B_YEAST	1	1	1	0	0	1
sp|P0C5N3|YG41A_YEAST	1	1	0	0	0	0
sp|P0C7L2|PAAJ_ECOLI	1	0	0	0	0	0
sp|P0C8J6|GATY_ECOLI	1	1	1	1	1	1
sp|P0C8J8|GATZ_ECOLI	1	1	1	1	1	1
sp|P0CS90|HSP77_YEAST	1	1	1	1	1	1
sp|P0CT04|IPB2_YEAST	1	1	1	1	1	1
sp|P0CX41|RL23A_YEAST	1	1	1	1	1	1
sp|P0CX49|RL18A_YEAST	1	1	1	1	1	1
sp|P0CX84|RL35A_YEAST	1	1	0	0	1	1
sp|P0DP89|ILVGP_ECOLI	1	1	1	1	1	1
sp|P0DTT0|BIPA_ECOLI	1	1	1	1	1	1
sp|P10080|SSBP1_YEAST	1	0	0	1	1	1
sp|P10081|IF4A_YEAST	1	1	0	0	1	1
sp|P10100|RLPA_ECOLI	1	1	1	0	0	0
sp|P10121|FTSY_ECOLI	1	1	1	1	1	1
sp|P10356|YEY2_YEAST	1	0	1	0	0	1
sp|P10363|PRI1_YEAST	1	1	1	1	1	1
sp|P10408|SECA_ECOLI	1	1	1	0	0	1
sp|P10507|MPPB_YEAST	1	0	0	0	0	0
sp|P10591|HSP71_YEAST	1	1	0	0	1	1
sp|P10592|HSP72_YEAST	1	0	0	0	0	0
sp|P10614|CP51_YEAST	1	1	1	1	1	1
sp|P10622|RLA3_YEAST	1	1	0	0	0	1
sp|P10659|METK1_YEAST	1	1	1	1	1	1
sp|P10662|RT01_YEAST	1	1	1	0	0	1
sp|P10664|RL4A_YEAST	1	1	1	1	1	1
sp|P10823|GPA2_YEAST	1	1	1	1	0	1
sp|P10869|AK_YEAST	1	1	1	1	1	1
sp|P10961|HSF_YEAST	1	1	1	0	0	1
sp|P10962|MAK16_YEAST	1	1	1	1	1	1
sp|P10963|PCKA_YEAST	1	1	0	1	0	1
sp|P10964|RPA1_YEAST	1	1	0	0	1	1
sp|P11075|SEC7_YEAST	1	1	0	0	1	1
sp|P11076|ARF1_YEAST	1	0	0	1	1	1
sp|P11154|PYC1_YEAST	1	1	1	0	0	1
sp|P11325|SYLM_YEAST	1	1	0	0	0	0
sp|P11353|HEM6_YEAST	1	1	1	0	1	1
sp|P11412|G6PD_YEAST	1	1	1	1	1	1
sp|P11433|CDC24_YEAST	1	0	0	1	1	1
sp|P11484|SSB1_YEAST	1	0	0	0	0	0
sp|P11491|PPB_YEAST	1	1	1	0	0	1
sp|P11632|NHP6A_YEAST	1	1	1	1	1	1
sp|P11633|NHP6B_YEAST	1	1	0	0	0	1
sp|P11655|SEC12_YEAST	1	1	0	0	1	1
sp|P11709|BIK1_YEAST	1	1	1	1	0	1
sp|P11745|RNA1_YEAST	1	1	1	1	1	1
sp|P11792|SCH9_YEAST	1	1	1	1	1	1
sp|P11875|SYR_ECOLI	1	1	1	0	0	1
sp|P11880|MURF_ECOLI	1	1	1	0	0	1
sp|P11914|MPPA_YEAST	1	1	0	0	1	0
sp|P11927|KAR1_YEAST	1	0	0	0	0	0
sp|P11938|RAP1_YEAST	1	1	1	0	0	1
sp|P11978|SIR4_YEAST	1	1	0	1	0	1
sp|P11988|BGLB_ECOLI	1	0	0	0	0	1
sp|P12008|AROC_ECOLI	1	1	1	1	0	1
sp|P12281|MOEA_ECOLI	1	0	0	0	0	1
sp|P12383|PDR1_YEAST	1	1	1	1	1	1
sp|P12385|ERF1_YEAST	1	1	1	0	0	1
sp|P12611|WHI2_YEAST	1	1	1	1	1	1
sp|P12612|TCPA_YEAST	1	1	1	0	0	1
sp|P12630|BAR1_YEAST	1	1	1	1	1	1
sp|P12683|HMDH1_YEAST	1	1	1	1	0	0
sp|P12684|HMDH2_YEAST	1	1	0	1	1	1
sp|P12687|RM02_YEAST	1	0	0	0	0	0
sp|P12688|YPK1_YEAST	1	1	1	1	1	1
sp|P12695|ODP2_YEAST	1	1	1	0	0	1
sp|P12709|G6PI_YEAST	1	1	1	1	1	1
sp|P12753|RAD50_YEAST	1	1	0	0	0	1
sp|P12754|EI2BD_YEAST	1	1	0	0	0	1
sp|P12758|UDP_ECOLI	1	1	1	1	1	1
sp|P12868|PEP5_YEAST	1	1	0	0	1	1
sp|P12904|AAKG_YEAST	1	1	1	0	1	1
sp|P12945|NAT1_YEAST	1	1	1	1	1	1
sp|P12962|CAF20_YEAST	1	1	0	0	1	1
sp|P12994|YBHB_ECOLI	1	1	1	1	1	1
sp|P12996|BIOB_ECOLI	1	0	0	0	0	0
sp|P13024|FDHE_ECOLI	1	1	1	1	1	1
sp|P13029|KATG_ECOLI	1	1	1	1	1	1
sp|P13033|GLPB_ECOLI	1	1	1	0	0	1
sp|P13035|GLPD_ECOLI	1	1	1	1	1	1
sp|P13130|SS100_YEAST	1	1	1	0	0	1
sp|P13134|KEX2_YEAST	1	1	1	1	1	1
sp|P13185|KIN1_YEAST	1	0	0	0	0	0
sp|P13186|KIN2_YEAST	1	1	1	0	0	1
sp|P13188|SYQ_YEAST	1	1	1	1	1	1
sp|P13259|PCY1_YEAST	1	1	1	1	1	1
sp|P13298|PYRE_YEAST	1	1	0	0	1	1
sp|P13382|DPOLA_YEAST	1	1	0	0	0	1
sp|P13393|TBP_YEAST	1	1	1	1	1	1
sp|P13433|RPOM_YEAST	1	1	0	0	0	1
sp|P13445|RPOS_ECOLI	1	1	1	0	0	1
sp|P13482|TREA_ECOLI	1	1	1	1	0	1
sp|P13517|CAPZB_YEAST	1	1	1	0	1	1
sp|P13574|STE12_YEAST	1	1	0	0	1	1
sp|P13586|ATC1_YEAST	1	1	0	1	0	1
sp|P13587|ATN1_YEAST	1	0	0	0	0	0
sp|P13663|DHAS_YEAST	1	1	1	1	1	1
sp|P13712|MSI1_YEAST	1	1	1	1	1	1
sp|P13856|RSR1_YEAST	1	1	1	1	1	1
sp|P13857|RIML_ECOLI	1	1	1	1	1	1
sp|P13902|INO4_YEAST	1	1	1	1	1	0
sp|P14020|DPM1_YEAST	1	1	1	1	1	1
sp|P14065|GCY1_YEAST	1	1	1	1	1	1
sp|P14120|RL30_YEAST	1	0	0	0	0	0
sp|P14126|RL3_YEAST	1	1	1	0	0	1
sp|P14164|ABF1_YEAST	1	1	1	1	0	1
sp|P14180|CHS2_YEAST	1	0	0	1	1	0
sp|P14291|RED1_YEAST	1	0	0	0	0	0
sp|P14306|CPYI_YEAST	1	1	1	0	0	1
sp|P14540|ALF_YEAST	1	1	0	0	0	1
sp|P14680|YAK1_YEAST	1	1	0	0	0	1
sp|P14682|UBC3_YEAST	1	1	0	1	1	1
sp|P14693|SAM35_YEAST	1	1	1	1	1	1
sp|P14741|EI2BA_YEAST	1	1	0	0	0	1
sp|P14742|GFA1_YEAST	1	1	1	1	1	1
sp|P14743|NMT_YEAST	1	1	0	1	0	1
sp|P14747|PP2B2_YEAST	1	1	1	1	1	1
sp|P14772|BPT1_YEAST	1	1	0	1	0	0
sp|P14832|CYPH_YEAST	1	1	0	0	0	1
sp|P14843|AROF_YEAST	1	1	1	1	1	1
sp|P14900|MURD_ECOLI	1	1	1	0	0	1
sp|P14904|AMPL_YEAST	1	1	0	0	1	1
sp|P14906|SEC63_YEAST	1	1	1	1	1	1
sp|P14907|NSP1_YEAST	1	1	1	1	0	1
sp|P14908|MTF1_YEAST	1	1	0	0	1	1
sp|P14922|CYC8_YEAST	1	1	0	0	1	1
sp|P15019|TAL1_YEAST	1	0	0	1	1	0
sp|P15028|FECB_ECOLI	1	0	0	0	0	1
sp|P15034|AMPP_ECOLI	1	1	1	1	1	1
sp|P15042|DNLJ_ECOLI	1	1	0	1	0	0
sp|P15067|GLGX_ECOLI	1	0	0	0	0	0
sp|P15108|HSC82_YEAST	1	1	0	0	0	1
sp|P15179|SYDM_YEAST	1	0	0	0	0	0
sp|P15180|SYKC_YEAST	1	1	1	1	1	1
sp|P15254|PUR4_ECOLI	1	1	1	1	1	1
sp|P15274|AMPD_YEAST	1	1	1	1	1	1
sp|P15288|PEPD_ECOLI	1	1	1	1	0	1
sp|P15303|SEC23_YEAST	1	1	0	1	1	1
sp|P15367|SEC11_YEAST	1	1	0	0	0	0
sp|P15424|MS116_YEAST	1	1	1	1	1	1
sp|P15436|DPOD_YEAST	1	1	0	0	0	1
sp|P15442|GCN2_YEAST	1	0	0	0	0	0
sp|P15454|KGUA_YEAST	1	1	1	1	1	1
sp|P15496|IDI1_YEAST	1	1	1	1	1	1
sp|P15565|TRM1_YEAST	1	1	0	0	0	1
sp|P15624|SYFB_YEAST	1	1	1	1	0	1
sp|P15625|SYFA_YEAST	1	1	1	0	0	1
sp|P15639|PUR9_ECOLI	1	1	1	1	1	1
sp|P15640|PUR2_ECOLI	1	1	1	1	1	1
sp|P15646|FBRL_YEAST	1	1	1	1	1	1
sp|P15700|KCY_YEAST	1	1	1	1	1	1
sp|P15703|BGL2_YEAST	1	0	0	0	1	0
sp|P15705|STI1_YEAST	1	1	0	0	0	1
sp|P15731|UBC4_YEAST	1	0	1	1	1	0
sp|P15770|AROE_ECOLI	1	1	1	1	1	1
sp|P15790|CSK21_YEAST	1	1	1	1	1	1
sp|P15873|PCNA_YEAST	1	1	1	1	1	1
sp|P15891|ABP1_YEAST	1	1	0	0	1	1
sp|P15938|PRP16_YEAST	1	1	0	1	1	1
sp|P15977|MALQ_ECOLI	1	1	1	1	0	1
sp|P15992|HSP26_YEAST	1	1	1	1	1	1
sp|P16095|SDHL_ECOLI	1	1	1	1	1	1
sp|P16120|THRC_YEAST	1	1	1	0	0	1
sp|P16140|VATB_YEAST	1	1	1	1	1	1
sp|P16370|RPB3_YEAST	1	1	1	1	1	1
sp|P16387|ODPA_YEAST	1	1	1	1	0	1
sp|P16451|ODPX_YEAST	1	1	0	0	0	1
sp|P16456|SELD_ECOLI	1	1	1	0	0	1
sp|P16467|PDC5_YEAST	1	1	1	1	1	1
sp|P16474|BIP_YEAST	1	1	1	1	1	1
sp|P16521|EF3A_YEAST	1	1	1	1	1	1
sp|P16528|ICLR_ECOLI	1	1	0	1	0	1
sp|P16547|OM45_YEAST	1	1	0	0	0	0
sp|P16550|APA1_YEAST	1	1	1	1	1	1
sp|P16603|NCPR_YEAST	1	1	1	1	0	1
sp|P16622|HEMH_YEAST	1	1	0	0	0	1
sp|P16639|ATE1_YEAST	1	1	1	0	1	1
sp|P16649|TUP1_YEAST	1	1	1	0	0	1
sp|P16659|SYP_ECOLI	1	1	1	1	0	1
sp|P16661|ALG1_YEAST	1	1	0	0	1	1
sp|P16664|RGP1_YEAST	1	0	0	0	0	0
sp|P16700|CYSP_ECOLI	1	1	1	0	0	1
sp|P16861|PFKA1_YEAST	1	1	1	1	1	1
sp|P16862|PFKA2_YEAST	1	1	1	1	0	1
sp|P16869|FHUE_ECOLI	1	0	0	0	0	0
sp|P16965|STF2_YEAST	1	1	1	1	1	1
sp|P17065|SEC2_YEAST	1	1	0	1	1	1
sp|P17076|RL8A_YEAST	1	1	1	1	1	1
sp|P17106|CBF1_YEAST	1	1	1	0	0	1
sp|P17115|GUTQ_ECOLI	1	0	0	0	0	0
sp|P17117|NFSA_ECOLI	1	1	1	1	0	1
sp|P17121|SAC7_YEAST	1	1	1	1	1	1
sp|P17157|PHO85_YEAST	1	1	1	1	1	1
sp|P17169|GLMS_ECOLI	1	1	1	1	1	1
sp|P17214|EST1_YEAST	1	0	0	0	0	0
sp|P17255|VATA_YEAST	1	1	1	1	1	1
sp|P17261|ERS1_YEAST	1	1	0	1	1	1
sp|P17423|KHSE_YEAST	1	1	0	0	0	1
sp|P17442|PHO81_YEAST	1	1	1	0	0	1
sp|P17505|MDHM_YEAST	1	1	0	0	1	1
sp|P17536|TPM1_YEAST	1	1	0	0	0	1
sp|P17555|CAP_YEAST	1	1	1	0	1	1
sp|P17629|HPR1_YEAST	1	1	0	0	0	1
sp|P17649|GABAT_YEAST	1	1	1	1	1	1
sp|P17695|GLRX2_YEAST	1	1	1	0	1	1
sp|P17709|HXKG_YEAST	1	1	1	1	1	1
sp|P17846|CYSI_ECOLI	1	1	1	0	1	1
sp|P17883|SKI3_YEAST	1	1	1	0	1	1
sp|P17890|RPC7_YEAST	1	1	0	1	0	0
sp|P17891|CLC1_YEAST	1	1	1	1	1	1
sp|P17898|CPT1_YEAST	1	1	0	0	1	1
sp|P17952|MURC_ECOLI	1	0	0	1	1	0
sp|P17967|PDI_YEAST	1	1	1	1	1	1
sp|P17993|UBIG_ECOLI	1	1	1	1	1	1
sp|P18196|MINC_ECOLI	1	1	1	1	1	1
sp|P18238|ADT3_YEAST	1	1	1	1	1	1
sp|P18239|ADT2_YEAST	1	1	0	1	1	1
sp|P18390|YJJA_ECOLI	1	1	1	0	0	1
sp|P18409|MDM10_YEAST	1	0	0	0	0	0
sp|P18411|FUN14_YEAST	1	1	1	0	1	1
sp|P18414|ERD2_YEAST	1	1	1	1	1	1
sp|P18480|SNF5_YEAST	1	1	1	0	0	1
sp|P18494|GLN3_YEAST	1	1	0	0	0	1
sp|P18496|ATP10_YEAST	1	1	1	1	1	1
sp|P18562|UPP_YEAST	1	0	0	1	0	0
sp|P18759|SEC18_YEAST	1	1	1	1	1	1
sp|P18843|NADE_ECOLI	1	1	1	1	1	1
sp|P18851|GBB_YEAST	1	0	0	0	0	0
sp|P18852|GBG_YEAST	1	1	1	1	1	1
sp|P18888|SNF6_YEAST	1	1	1	0	1	1
sp|P18898|PGTB1_YEAST	1	1	1	0	1	1
sp|P18899|DDR48_YEAST	1	1	1	0	0	1
sp|P18900|COQ1_YEAST	1	1	0	1	1	1
sp|P18956|GGT_ECOLI	1	1	1	1	0	1
sp|P18961|YPK2_YEAST	1	1	0	0	0	1
sp|P18962|DAP2_YEAST	1	0	1	0	1	1
sp|P18963|IRA1_YEAST	1	0	0	0	1	0
sp|P19073|CDC42_YEAST	1	1	1	1	1	1
sp|P19097|FAS2_YEAST	1	1	1	1	1	1
sp|P19158|IRA2_YEAST	1	0	0	0	0	0
sp|P19211|IF5A2_YEAST	1	1	0	0	0	1
sp|P19262|ODO2_YEAST	1	1	0	1	0	0
sp|P19263|MED14_YEAST	1	1	0	1	1	1
sp|P19358|METK2_YEAST	1	1	1	1	1	1
sp|P19414|ACON_YEAST	1	1	1	1	1	1
sp|P19454|CSK22_YEAST	1	1	1	1	1	1
sp|P19524|MYO2_YEAST	1	1	1	0	0	1
sp|P19541|RDS2_YEAST	1	1	0	0	0	1
sp|P19658|EXO70_YEAST	1	1	1	1	0	1
sp|P19659|MED15_YEAST	1	0	0	0	1	0
sp|P19735|PRP6_YEAST	1	1	0	1	0	1
sp|P19736|PRP9_YEAST	1	0	0	0	0	0
sp|P19768|INSJ_ECOLI	1	0	0	0	0	0
sp|P19812|UBR1_YEAST	1	1	1	1	0	1
sp|P19880|AP1_YEAST	1	1	1	1	1	1
sp|P19881|PNPP_YEAST	1	1	1	0	0	1
sp|P19882|HSP60_YEAST	1	1	0	0	0	1
sp|P19926|AGP_ECOLI	1	1	1	1	1	1
sp|P19955|RT31_YEAST	1	1	1	1	1	1
sp|P20048|SEC59_YEAST	1	0	0	0	0	0
sp|P20049|TYR1_YEAST	1	1	1	0	1	1
sp|P20051|PYRC_YEAST	1	1	1	0	1	1
sp|P20053|PRP4_YEAST	1	1	0	1	1	1
sp|P20081|FKBP_YEAST	1	1	1	1	1	1
sp|P20084|RM33_YEAST	1	1	1	1	0	1
sp|P20095|PRP2_YEAST	1	1	0	0	0	1
sp|P20107|ZRC1_YEAST	1	1	0	0	0	1
sp|P20133|PGTB2_YEAST	1	0	0	0	0	0
sp|P20134|SFL1_YEAST	1	0	0	0	0	0
sp|P20424|SRP54_YEAST	1	1	0	1	1	1
sp|P20434|RPAB1_YEAST	1	1	0	0	0	0
sp|P20435|RPAB2_YEAST	1	0	0	1	1	0
sp|P20436|RPAB3_YEAST	1	1	1	1	1	1
sp|P20447|DBP3_YEAST	1	1	1	1	1	1
sp|P20448|DBP4_YEAST	1	1	0	0	0	1
sp|P20449|DBP5_YEAST	1	1	1	1	1	1
sp|P20457|PRI2_YEAST	1	1	1	1	0	1
sp|P20459|IF2A_YEAST	1	1	1	1	1	1
sp|P20484|MAK11_YEAST	1	1	0	0	1	1
sp|P20485|KICH_YEAST	1	1	1	1	1	1
sp|P20486|CKS1_YEAST	1	1	0	0	0	1
sp|P20604|PP11_YEAST	1	1	0	0	0	1
sp|P20606|SAR1_YEAST	1	1	1	1	1	1
sp|P20676|NUP1_YEAST	1	1	1	1	1	1
sp|P20795|VPS33_YEAST	1	0	0	0	0	0
sp|P20967|ODO1_YEAST	1	1	0	1	1	1
sp|P21147|ACO1_YEAST	1	0	0	0	0	0
sp|P21151|FADA_ECOLI	1	1	1	1	1	1
sp|P21165|PEPQ_ECOLI	1	1	1	1	1	1
sp|P21170|SPEA_ECOLI	1	1	1	1	1	1
sp|P21177|FADB_ECOLI	1	1	1	1	0	1
sp|P21179|CATE_ECOLI	1	1	1	1	0	1
sp|P21182|DCAM_YEAST	1	1	0	1	1	1
sp|P21242|PSA7_YEAST	1	1	1	1	1	1
sp|P21243|PSA1_YEAST	1	1	1	1	0	1
sp|P21264|PUR6_YEAST	1	1	1	1	1	1
sp|P21269|CCA1_YEAST	1	1	1	0	0	1
sp|P21304|PWP1_YEAST	1	1	1	0	0	1
sp|P21306|ATP5E_YEAST	1	0	0	0	0	0
sp|P21339|MSB1_YEAST	1	1	0	0	0	1
sp|P21367|YCAC_ECOLI	1	1	1	1	1	1
sp|P21372|PRP5_YEAST	1	0	0	0	0	0
sp|P21373|UTR1_YEAST	1	1	0	0	0	1
sp|P21374|ISY1_YEAST	1	1	0	0	0	1
sp|P21375|OSM1_YEAST	1	1	1	1	1	1
sp|P21499|RNR_ECOLI	1	1	1	1	1	1
sp|P21507|SRMB_ECOLI	1	1	0	1	0	1
sp|P21513|RNE_ECOLI	1	1	1	1	0	1
sp|P21524|RIR1_YEAST	1	1	1	0	1	1
sp|P21538|REB1_YEAST	1	1	1	0	0	1
sp|P21560|CBP3_YEAST	1	0	0	0	1	0
sp|P21576|VPS1_YEAST	1	1	1	1	0	1
sp|P21599|KPYK2_ECOLI	1	1	1	1	0	1
sp|P21645|LPXD_ECOLI	1	1	1	1	1	1
sp|P21657|DAL81_YEAST	1	1	1	1	1	1
sp|P21734|UBC1_YEAST	1	1	0	1	1	1
sp|P21801|SDHB_YEAST	1	0	0	0	0	0
sp|P21825|SEC62_YEAST	1	1	1	1	1	1
sp|P21827|RCC1_YEAST	1	1	1	1	1	1
sp|P21888|SYC_ECOLI	1	1	1	0	1	1
sp|P21889|SYD_ECOLI	1	1	1	1	0	1
sp|P21951|DPOE_YEAST	1	1	1	0	1	1
sp|P21954|IDHP_YEAST	1	1	0	1	1	1
sp|P21957|OPI1_YEAST	1	1	1	1	0	1
sp|P21965|MCK1_YEAST	1	1	1	0	0	1
sp|P22007|FNTB_YEAST	1	0	0	0	0	0
sp|P22023|KRE5_YEAST	1	1	0	0	0	1
sp|P22082|SNF2_YEAST	1	1	0	0	1	1
sp|P22106|ASNB_ECOLI	1	1	1	1	1	1
sp|P22108|APA2_YEAST	1	0	0	0	0	0
sp|P22133|MDHC_YEAST	1	1	1	1	1	1
sp|P22134|MAG_YEAST	1	1	0	0	0	1
sp|P22135|ATP12_YEAST	1	1	1	0	0	1
sp|P22137|CLH_YEAST	1	1	1	1	1	1
sp|P22138|RPA2_YEAST	1	1	1	0	0	1
sp|P22139|RPAB5_YEAST	1	1	1	0	1	1
sp|P22140|EPT1_YEAST	1	1	1	1	1	1
sp|P22141|PSB4_YEAST	1	1	1	1	1	1
sp|P22146|GAS1_YEAST	1	1	1	1	1	1
sp|P22147|XRN1_YEAST	1	1	1	0	1	1
sp|P22148|MSN1_YEAST	1	0	0	0	0	0
sp|P22149|AFT1_YEAST	1	1	0	1	0	1
sp|P22188|MURE_ECOLI	1	1	1	1	1	1
sp|P22202|HSP74_YEAST	1	1	1	0	1	1
sp|P22203|VATE_YEAST	1	0	0	1	1	0
sp|P22204|DBF2_YEAST	1	0	0	0	0	0
sp|P22211|NPR1_YEAST	1	1	1	1	0	1
sp|P22213|SLY1_YEAST	1	1	0	0	1	1
sp|P22214|SEC22_YEAST	1	1	1	1	1	1
sp|P22216|RAD53_YEAST	1	1	0	0	0	0
sp|P22217|TRX1_YEAST	1	1	1	0	0	1
sp|P22219|VPS15_YEAST	1	0	0	0	1	0
sp|P22224|SEC15_YEAST	1	1	0	0	1	1
sp|P22255|CYSQ_ECOLI	1	1	1	1	0	1
sp|P22256|GABT_ECOLI	1	1	1	1	1	1
sp|P22259|PCKA_ECOLI	1	1	1	1	1	1
sp|P22276|RPC2_YEAST	1	1	1	1	1	1
sp|P22333|ADD_ECOLI	1	1	1	1	1	1
sp|P22336|RFA1_YEAST	1	0	0	0	1	1
sp|P22438|SYMM_YEAST	1	0	0	1	1	1
sp|P22470|SAN1_YEAST	1	1	1	1	1	1
sp|P22515|UBA1_YEAST	1	1	1	1	1	1
sp|P22517|KCC2_YEAST	1	1	1	1	1	1
sp|P22523|MUKB_ECOLI	1	1	0	1	1	1
sp|P22524|MUKE_ECOLI	1	1	1	1	1	1
sp|P22543|VPS34_YEAST	1	1	1	1	1	1
sp|P22564|RIHC_ECOLI	1	1	1	1	1	1
sp|P22579|SIN3_YEAST	1	0	0	0	0	0
sp|P22696|ESS1_YEAST	1	1	1	1	1	1
sp|P22768|ASSY_YEAST	1	1	1	0	0	1
sp|P22803|TRX2_YEAST	1	0	0	0	0	0
sp|P22804|BET1_YEAST	1	1	0	0	0	1
sp|P22855|MAN1_YEAST	1	1	0	0	1	1
sp|P22936|APN1_YEAST	1	1	1	0	0	1
sp|P22943|HSP12_YEAST	1	0	0	0	1	0
sp|P23003|TRMA_ECOLI	1	1	1	0	1	1
sp|P23060|MAK32_YEAST	1	1	0	0	0	1
sp|P23180|AIM17_YEAST	1	1	1	0	1	1
sp|P23201|SPA2_YEAST	1	1	0	1	0	1
sp|P23202|URE2_YEAST	1	1	1	1	1	1
sp|P23248|RS3A2_YEAST	1	0	0	0	0	0
sp|P23254|TKT1_YEAST	1	1	1	1	1	1
sp|P23255|TAF2_YEAST	1	1	1	0	0	1
sp|P23287|PP2B1_YEAST	1	1	0	0	1	1
sp|P23291|KC11_YEAST	1	1	1	1	1	1
sp|P23292|KC12_YEAST	1	1	1	1	1	1
sp|P23293|BUR1_YEAST	1	1	0	0	0	1
sp|P23301|IF5A1_YEAST	1	1	1	1	1	1
sp|P23337|GYS1_YEAST	1	1	1	0	0	1
sp|P23394|PRP28_YEAST	1	1	0	0	1	1
sp|P23493|MBR1_YEAST	1	0	0	0	0	0
sp|P23503|NAR1_YEAST	1	1	1	1	1	1
sp|P23522|GARL_ECOLI	1	1	1	1	1	1
sp|P23538|PPSA_ECOLI	1	1	1	1	0	1
sp|P23542|AATC_YEAST	1	1	1	1	1	1
sp|P23561|STE11_YEAST	1	1	0	1	1	1
sp|P23585|HXT2_YEAST	1	1	1	0	1	1
sp|P23594|PP2A1_YEAST	1	1	1	1	1	1
sp|P23595|PP2A2_YEAST	1	1	0	0	1	1
sp|P23615|SPT6_YEAST	1	1	1	1	1	1
sp|P23638|PSA3_YEAST	1	1	1	1	0	1
sp|P23639|PSA2_YEAST	1	1	1	0	0	1
sp|P23641|MPCP_YEAST	1	1	0	0	0	1
sp|P23642|VAN1_YEAST	1	1	0	1	1	1
sp|P23643|VPS3_YEAST	1	1	1	0	0	1
sp|P23644|TOM40_YEAST	1	1	0	0	1	1
sp|P23721|SERC_ECOLI	1	1	1	1	1	1
sp|P23724|PSB6_YEAST	1	1	1	1	1	1
sp|P23776|EXG1_YEAST	1	1	0	1	1	1
sp|P23827|ECOT_ECOLI	1	1	1	1	1	1
sp|P23830|PSS_ECOLI	1	1	1	1	0	1
sp|P23833|SCO1_YEAST	1	1	1	1	0	1
sp|P23836|PHOP_ECOLI	1	1	1	1	1	1
sp|P23837|PHOQ_ECOLI	1	1	1	1	1	1
sp|P23839|YICC_ECOLI	1	1	1	1	0	1
sp|P23843|OPPA_ECOLI	1	1	1	1	0	1
sp|P23847|DPPA_ECOLI	1	1	1	1	1	1
sp|P23857|PSPE_ECOLI	1	1	1	1	1	1
sp|P23865|PRC_ECOLI	1	0	0	0	0	1
sp|P23869|PPIB_ECOLI	1	1	1	1	1	1
sp|P23874|HIPA_ECOLI	1	0	0	0	1	0
sp|P23882|FMT_ECOLI	1	1	1	1	0	1
sp|P23883|PUUC_ECOLI	1	1	1	1	0	1
sp|P23893|GSA_ECOLI	1	1	1	1	0	1
sp|P23898|NLPC_ECOLI	1	0	0	0	0	0
sp|P23900|FPS1_YEAST	1	0	1	0	1	1
sp|P23917|MAK_ECOLI	1	1	1	1	1	1
sp|P24000|RL24B_YEAST	1	1	0	0	1	1
sp|P24004|PEX1_YEAST	1	1	1	0	0	1
sp|P24031|PPA3_YEAST	1	0	0	0	0	0
sp|P24171|DCP_ECOLI	1	1	1	1	0	1
sp|P24182|ACCC_ECOLI	1	1	1	1	1	1
sp|P24186|FOLD_ECOLI	1	1	1	1	1	1
sp|P24215|UXUA_ECOLI	1	1	1	1	1	1
sp|P24255|RP54_ECOLI	1	1	1	1	1	1
sp|P24276|SSD1_YEAST	1	1	1	1	1	1
sp|P24279|MCM3_YEAST	1	1	0	1	1	1
sp|P24280|SEC14_YEAST	1	0	0	0	0	0
sp|P24521|ERG8_YEAST	1	1	1	1	1	1
sp|P24583|KPC1_YEAST	1	1	0	0	0	1
sp|P24783|DBP2_YEAST	1	1	0	1	1	1
sp|P24784|DBP1_YEAST	1	1	1	0	0	1
sp|P25037|UBP1_YEAST	1	1	0	0	0	1
sp|P25038|IF2M_YEAST	1	0	0	0	0	0
sp|P25039|EFGM_YEAST	1	1	0	0	0	1
sp|P25040|TSR4_YEAST	1	1	0	0	0	1
sp|P25043|PSB2_YEAST	1	1	1	1	1	1
sp|P25044|PTP1_YEAST	1	1	1	1	1	1
sp|P25045|LCB1_YEAST	1	1	1	0	1	1
sp|P25087|ERG6_YEAST	1	1	1	1	1	1
sp|P25293|NAP1_YEAST	1	1	1	0	0	1
sp|P25294|SIS1_YEAST	1	0	0	1	1	0
sp|P25296|CANB_YEAST	1	1	1	1	0	1
sp|P25297|PHO84_YEAST	1	1	1	1	0	1
sp|P25298|RNA14_YEAST	1	1	1	0	0	1
sp|P25299|RNA15_YEAST	1	1	1	1	1	1
sp|P25302|SWI4_YEAST	1	1	1	0	0	1
sp|P25303|SCJ1_YEAST	1	1	1	1	1	1
sp|P25332|RBSK_YEAST	1	1	1	0	1	1
sp|P25333|HAL4_YEAST	1	1	0	0	0	1
sp|P25338|MPO1_YEAST	1	1	0	0	0	1
sp|P25339|PUF4_YEAST	1	1	1	1	1	1
sp|P25340|ERG4_YEAST	1	1	1	1	1	1
sp|P25341|KIN82_YEAST	1	0	0	0	0	0
sp|P25342|CDC10_YEAST	1	1	1	1	1	1
sp|P25343|RV161_YEAST	1	1	0	1	1	1
sp|P25344|STE50_YEAST	1	0	0	0	0	0
sp|P25345|SYNM_YEAST	1	1	0	0	0	1
sp|P25349|YCP4_YEAST	1	1	1	1	1	1
sp|P25353|NPP1_YEAST	1	1	0	1	0	1
sp|P25355|CTR86_YEAST	1	1	1	0	0	1
sp|P25357|SNT1_YEAST	1	1	1	1	1	1
sp|P25358|ELO2_YEAST	1	1	1	1	1	1
sp|P25359|RRP43_YEAST	1	0	0	0	1	0
sp|P25361|YCT3_YEAST	1	0	0	0	0	0
sp|P25365|SED4_YEAST	1	1	0	1	1	1
sp|P25366|OCA4_YEAST	1	1	1	1	1	1
sp|P25367|RNQ1_YEAST	1	1	1	1	1	1
sp|P25369|LSB5_YEAST	1	1	1	1	1	1
sp|P25371|ADP1_YEAST	1	1	1	1	1	1
sp|P25372|TRX3_YEAST	1	0	0	0	0	0
sp|P25373|GLRX1_YEAST	1	1	1	1	1	1
sp|P25374|NFS1_YEAST	1	1	1	1	1	1
sp|P25375|PRTD_YEAST	1	1	1	0	1	1
sp|P25376|AGP1_YEAST	1	0	0	0	0	0
sp|P25378|RHEB_YEAST	1	0	0	0	0	0
sp|P25379|STDH_YEAST	1	1	0	0	0	1
sp|P25382|NLE1_YEAST	1	0	1	0	1	1
sp|P25385|BOS1_YEAST	1	0	0	0	0	0
sp|P25386|USO1_YEAST	1	1	1	1	1	1
sp|P25389|KCC4_YEAST	1	1	1	1	1	1
sp|P25437|FRMA_ECOLI	1	1	1	1	1	1
sp|P25441|RPC4_YEAST	1	1	1	1	1	1
sp|P25443|RS2_YEAST	1	1	1	1	1	1
sp|P25451|PSB3_YEAST	1	1	0	1	1	1
sp|P25454|RAD51_YEAST	1	1	1	1	1	1
sp|P25491|MAS5_YEAST	1	1	1	1	1	1
sp|P25516|ACNA_ECOLI	1	1	1	1	0	1
sp|P25519|HFLX_ECOLI	1	1	1	1	1	1
sp|P25522|MNME_ECOLI	1	1	1	0	0	1
sp|P25526|GABD_ECOLI	1	1	1	1	0	1
sp|P25536|NTPPA_ECOLI	1	1	1	1	0	1
sp|P25539|RIBD_ECOLI	1	1	1	1	1	1
sp|P25552|GPPA_ECOLI	1	0	0	0	0	0
sp|P25553|ALDA_ECOLI	1	1	1	1	1	1
sp|P25554|SGF29_YEAST	1	1	1	1	1	1
sp|P25555|GBP2_YEAST	1	1	1	1	1	1
sp|P25558|BUD3_YEAST	1	1	1	0	0	1
sp|P25559|DCC1_YEAST	1	1	1	1	1	1
sp|P25560|RER1_YEAST	1	1	1	1	1	1
sp|P25566|MXR2_YEAST	1	1	1	1	0	1
sp|P25567|SRO9_YEAST	1	1	1	1	1	1
sp|P25568|ATG22_YEAST	1	1	1	1	1	1
sp|P25569|GID7_YEAST	1	1	0	0	0	0
sp|P25573|MGR1_YEAST	1	1	1	1	1	1
sp|P25574|EMC1_YEAST	1	1	1	1	1	1
sp|P25576|POF1_YEAST	1	1	0	0	0	0
sp|P25580|PBN1_YEAST	1	1	1	0	0	1
sp|P25582|SPB1_YEAST	1	0	0	0	0	0
sp|P25586|KRR1_YEAST	1	1	1	0	0	1
sp|P25588|MRC1_YEAST	1	1	0	0	0	0
sp|P25605|ILV6_YEAST	1	1	1	1	0	1
sp|P25616|CTO1_YEAST	1	0	0	1	1	0
sp|P25617|YCQ6_YEAST	1	1	1	1	1	1
sp|P25618|CWH43_YEAST	1	0	0	0	0	0
sp|P25619|HSP30_YEAST	1	1	1	1	1	1
sp|P25623|SYP1_YEAST	1	1	1	0	1	1
sp|P25625|PER1_YEAST	1	0	1	0	0	1
sp|P25626|IMG1_YEAST	1	1	1	1	1	1
sp|P25627|BUD23_YEAST	1	1	0	1	1	1
sp|P25628|ARE1_YEAST	1	1	0	0	0	1
sp|P25631|YCU1_YEAST	1	1	1	0	1	1
sp|P25632|RSC6_YEAST	1	1	0	0	1	1
sp|P25635|PWP2_YEAST	1	1	1	1	1	1
sp|P25638|TAH1_YEAST	1	1	1	1	1	1
sp|P25639|YCV1_YEAST	1	1	1	1	1	1
sp|P25644|PAT1_YEAST	1	1	1	0	1	1
sp|P25651|CSM1_YEAST	1	1	1	1	1	1
sp|P25654|YCY0_YEAST	1	0	0	0	0	0
sp|P25655|NOT1_YEAST	1	1	0	0	0	1
sp|P25656|CDC50_YEAST	1	1	0	0	0	1
sp|P25659|FUB1_YEAST	1	0	0	0	1	1
sp|P25694|CDC48_YEAST	1	1	1	1	1	1
sp|P25719|CYPC_YEAST	1	0	0	0	0	0
sp|P25738|MSYB_ECOLI	1	1	1	1	1	1
sp|P25745|MNMA_ECOLI	1	1	1	0	0	1
sp|P25808|SPB4_YEAST	1	0	0	0	1	0
sp|P25847|MSH2_YEAST	1	1	0	0	0	1
sp|P25894|LOIP_ECOLI	1	1	1	1	1	1
sp|P25906|PDXI_ECOLI	1	1	1	1	1	1
sp|P26321|RL5_YEAST	1	1	1	1	1	1
sp|P26570|PPZ1_YEAST	1	1	1	1	1	1
sp|P26612|AMY2_ECOLI	1	1	1	1	1	1
sp|P26616|MAO1_ECOLI	1	1	1	1	1	1
sp|P26637|SYLC_YEAST	1	1	1	1	1	1
sp|P26646|ACUI_ECOLI	1	1	1	1	1	1
sp|P26754|RFA2_YEAST	1	0	1	1	1	1
sp|P26755|RFA3_YEAST	1	0	0	0	0	0
sp|P26783|RS5_YEAST	1	0	0	1	1	0
sp|P26784|RL16A_YEAST	1	1	1	1	1	1
sp|P26785|RL16B_YEAST	1	0	1	1	1	1
sp|P26786|RS7A_YEAST	1	1	1	1	1	1
sp|P26793|FEN1_YEAST	1	1	1	1	1	1
sp|P27248|GCST_ECOLI	1	1	1	1	1	1
sp|P27250|AHR_ECOLI	1	1	1	0	1	1
sp|P27278|NADR_ECOLI	1	0	0	0	0	0
sp|P27298|OPDA_ECOLI	1	1	1	1	0	1
sp|P27302|TKT1_ECOLI	1	1	1	1	1	1
sp|P27305|GLUQ_ECOLI	1	0	0	0	0	0
sp|P27306|STHA_ECOLI	1	1	1	0	0	1
sp|P27351|AP2B_YEAST	1	1	1	1	1	1
sp|P27431|ROXA_ECOLI	1	1	1	0	0	1
sp|P27466|KCC1_YEAST	1	1	1	0	1	1
sp|P27472|GYS2_YEAST	1	1	1	1	1	1
sp|P27476|NSR1_YEAST	1	1	1	1	1	1
sp|P27514|PHO91_YEAST	1	1	0	0	0	1
sp|P27515|URK1_YEAST	1	1	0	0	1	1
sp|P27550|ACSA_ECOLI	1	1	1	1	0	1
sp|P27614|CBPS_YEAST	1	1	1	1	1	1
sp|P27616|PUR7_YEAST	1	1	1	1	1	1
sp|P27636|CDC15_YEAST	1	1	0	0	0	1
sp|P27637|BUD14_YEAST	1	1	1	1	0	1
sp|P27692|SPT5_YEAST	1	1	0	1	1	1
sp|P27697|COQ8_YEAST	1	1	0	0	0	1
sp|P27705|MIG1_YEAST	1	1	1	1	1	1
sp|P27801|PEP3_YEAST	1	1	0	0	0	1
sp|P27809|KRE2_YEAST	1	1	1	1	1	1
sp|P27810|KTR1_YEAST	1	1	1	0	0	1
sp|P27825|CALX_YEAST	1	1	0	0	1	1
sp|P27828|WECB_ECOLI	1	1	1	1	0	1
sp|P27829|WECC_ECOLI	1	0	1	1	1	0
sp|P27830|RMLB2_ECOLI	1	0	0	1	1	0
sp|P27848|YIGL_ECOLI	1	1	1	1	1	1
sp|P27882|ERV1_YEAST	1	1	0	0	0	1
sp|P27929|NAM9_YEAST	1	0	0	0	0	0
sp|P27999|RPB9_YEAST	1	1	0	0	0	1
sp|P28000|RPAC2_YEAST	1	1	0	0	0	1
sp|P28003|FUN19_YEAST	1	0	0	0	0	0
sp|P28006|GAC1_YEAST	1	0	0	0	0	0
sp|P28007|GAR1_YEAST	1	1	1	1	1	1
sp|P28241|IDH2_YEAST	1	1	1	1	1	1
sp|P28263|UBC8_YEAST	1	0	0	0	0	0
sp|P28272|PYRD_YEAST	1	1	1	1	1	1
sp|P28273|OPLA_YEAST	1	1	0	0	1	1
sp|P28274|URA7_YEAST	1	1	1	0	0	1
sp|P28304|QOR1_ECOLI	1	1	1	1	1	1
sp|P28319|CWP1_YEAST	1	1	1	1	1	1
sp|P28320|YJU2_YEAST	1	1	1	0	0	1
sp|P28321|MGLL_YEAST	1	1	1	0	0	1
sp|P28495|CAPZA_YEAST	1	1	0	1	1	1
sp|P28496|LAC1_YEAST	1	1	1	1	1	1
sp|P28625|YIM1_YEAST	1	1	1	1	1	1
sp|P28707|SBA1_YEAST	1	1	0	1	1	1
sp|P28708|PRR1_YEAST	1	0	0	0	0	0
sp|P28737|MSP1_YEAST	1	0	0	0	1	1
sp|P28777|AROC_YEAST	1	1	1	1	1	1
sp|P28789|HEM3_YEAST	1	1	1	1	0	1
sp|P28791|SEC20_YEAST	1	0	0	0	0	0
sp|P28795|PEX3_YEAST	1	0	0	0	0	0
sp|P28817|HIBCH_YEAST	1	0	0	0	0	0
sp|P28834|IDH1_YEAST	1	1	1	1	1	1
sp|P28861|FENR_ECOLI	1	1	1	1	1	1
sp|P28904|TREC_ECOLI	1	1	1	1	0	1
sp|P29012|ALR2_ECOLI	1	1	1	1	1	1
sp|P29013|YCGB_ECOLI	1	1	0	1	1	1
sp|P29029|CHIT_YEAST	1	1	1	1	1	1
sp|P29055|TF2B_YEAST	1	1	1	0	0	0
sp|P29056|TF3B_YEAST	1	1	0	0	0	0
sp|P29217|YCEH_ECOLI	1	1	1	1	1	1
sp|P29295|HRR25_YEAST	1	1	1	1	1	1
sp|P29311|BMH1_YEAST	1	1	1	0	0	1
sp|P29340|UBCX_YEAST	1	0	0	0	0	0
sp|P29366|BEM1_YEAST	1	1	0	0	0	0
sp|P29453|RL8B_YEAST	1	1	1	0	1	1
sp|P29465|CHS3_YEAST	1	1	0	0	0	0
sp|P29468|PAP_YEAST	1	1	0	0	0	1
sp|P29469|MCM2_YEAST	1	1	1	1	1	1
sp|P29478|SEC65_YEAST	1	1	0	1	0	1
sp|P29496|MCM5_YEAST	1	0	0	0	0	0
sp|P29509|TRXB1_YEAST	1	1	1	1	1	1
sp|P29539|RIF1_YEAST	1	1	0	0	1	0
sp|P29547|EF1G1_YEAST	1	1	1	1	1	1
sp|P29680|DCUP_ECOLI	1	1	1	1	0	1
sp|P29703|FNTA_YEAST	1	1	0	0	0	1
sp|P29704|ERG9_YEAST	1	1	0	1	0	1
sp|P29745|PEPT_ECOLI	1	1	1	1	1	1
sp|P29952|MPI_YEAST	1	1	1	0	0	1
sp|P30011|NADC_ECOLI	1	1	1	1	0	1
sp|P30125|LEU3_ECOLI	1	1	1	1	0	1
sp|P30177|YBIB_ECOLI	1	1	1	1	1	1
sp|P30619|SEC1_YEAST	1	1	0	0	0	1
sp|P30624|LCF1_YEAST	1	1	1	1	1	1
sp|P30656|PSB5_YEAST	1	0	0	0	0	0
sp|P30657|PSB7_YEAST	1	1	1	1	1	1
sp|P30665|MCM4_YEAST	1	1	0	0	0	1
sp|P30748|MOAD_ECOLI	1	0	0	0	0	1
sp|P30771|RENT1_YEAST	1	1	1	1	0	1
sp|P30822|XPO1_YEAST	1	1	0	0	0	1
sp|P30850|RNB_ECOLI	1	1	1	1	1	1
sp|P30859|ARTI_ECOLI	1	1	1	1	1	1
sp|P30902|ATP7_YEAST	1	1	0	0	1	1
sp|P30952|MLS1_YEAST	1	1	0	0	0	1
sp|P30958|MFD_ECOLI	1	1	1	1	1	1
sp|P31057|PANB_ECOLI	1	1	1	1	0	1
sp|P31115|PUS3_YEAST	1	1	1	1	1	1
sp|P31116|DHOM_YEAST	1	1	1	1	1	1
sp|P31120|GLMM_ECOLI	1	1	1	1	0	1
sp|P31133|POTF_ECOLI	1	1	1	1	1	1
sp|P31142|THTM_ECOLI	1	1	1	0	0	1
sp|P31373|CYS3_YEAST	1	1	0	1	0	1
sp|P31374|PSK1_YEAST	1	1	1	1	0	1
sp|P31376|SWC3_YEAST	1	1	1	1	1	1
sp|P31377|STX8_YEAST	1	0	0	0	0	0
sp|P31378|NTH1_YEAST	1	0	0	0	0	0
sp|P31380|FUN30_YEAST	1	1	0	0	0	1
sp|P31381|FUN26_YEAST	1	1	1	0	1	1
sp|P31382|PMT2_YEAST	1	1	0	0	0	1
sp|P31383|2AAA_YEAST	1	1	1	1	1	1
sp|P31384|CCR4_YEAST	1	1	1	1	1	1
sp|P31385|DEP1_YEAST	1	1	1	1	1	1
sp|P31412|VATC_YEAST	1	1	1	1	1	1
sp|P31435|YICJ_ECOLI	1	0	0	0	0	0
sp|P31455|YIDR_ECOLI	1	0	0	0	0	1
sp|P31539|HS104_YEAST	1	1	1	1	1	1
sp|P31658|HCHA_ECOLI	1	1	1	1	1	1
sp|P31663|PANC_ECOLI	1	1	1	0	0	1
sp|P31677|OTSA_ECOLI	1	1	1	0	1	1
sp|P31688|TPS2_YEAST	1	1	1	1	0	1
sp|P31697|FIMC_ECOLI	1	1	1	1	1	1
sp|P31755|OCH1_YEAST	1	1	1	1	1	1
sp|P31787|ACBP_YEAST	1	1	0	0	0	1
sp|P31806|NNR_ECOLI	1	1	1	1	1	1
sp|P31979|NUOF_ECOLI	1	1	1	1	1	1
sp|P32048|SYKM_YEAST	1	1	1	0	0	1
sp|P32074|COPG_YEAST	1	1	1	1	1	1
sp|P32099|LPLA_ECOLI	1	0	0	0	0	1
sp|P32157|YIIM_ECOLI	1	1	1	1	1	1
sp|P32162|YIIS_ECOLI	1	1	1	1	1	1
sp|P32173|MOBA_ECOLI	1	0	0	0	0	0
sp|P32176|FDOG_ECOLI	1	0	0	0	0	1
sp|P32178|CHMU_YEAST	1	1	0	0	0	1
sp|P32179|MET22_YEAST	1	1	0	1	1	1
sp|P32190|GLPK_YEAST	1	1	1	1	0	1
sp|P32191|GPDM_YEAST	1	1	1	1	1	1
sp|P32259|MED16_YEAST	1	1	0	1	1	1
sp|P32263|P5CR_YEAST	1	0	0	1	1	1
sp|P32264|PROB_YEAST	1	1	0	0	1	1
sp|P32266|MGM1_YEAST	1	1	1	1	1	1
sp|P32288|GLNA_YEAST	1	1	0	0	0	1
sp|P32316|ACH1_YEAST	1	1	0	1	0	1
sp|P32317|AFG1_YEAST	1	1	0	1	0	1
sp|P32319|VPS10_YEAST	1	1	1	0	0	1
sp|P32324|EF2_YEAST	1	1	1	1	1	1
sp|P32327|PYC2_YEAST	1	1	1	1	1	1
sp|P32328|DBF20_YEAST	1	1	1	0	0	1
sp|P32329|YPS1_YEAST	1	0	0	0	0	0
sp|P32333|BTAF1_YEAST	1	1	0	0	0	1
sp|P32335|MSS51_YEAST	1	0	0	0	0	0
sp|P32336|NUD1_YEAST	1	1	0	0	0	1
sp|P32337|IMB3_YEAST	1	1	1	1	1	1
sp|P32340|NDI1_YEAST	1	1	0	1	1	1
sp|P32341|VPH2_YEAST	1	1	1	0	1	1
sp|P32342|SRP21_YEAST	1	0	0	0	0	0
sp|P32345|PP4C_YEAST	1	0	0	0	0	0
sp|P32347|DCUP_YEAST	1	1	1	1	1	1
sp|P32349|RPC3_YEAST	1	1	0	1	1	1
sp|P32350|KNS1_YEAST	1	0	0	0	0	0
sp|P32351|IMPX_YEAST	1	1	1	0	0	1
sp|P32352|ERG2_YEAST	1	1	1	1	1	1
sp|P32353|ERG3_YEAST	1	0	0	0	0	0
sp|P32356|TREA_YEAST	1	1	1	1	1	1
sp|P32357|AAR2_YEAST	1	1	0	0	0	1
sp|P32361|IRE1_YEAST	1	0	0	0	0	0
sp|P32364|SMY1_YEAST	1	1	0	0	0	1
sp|P32366|VA0D_YEAST	1	1	1	1	1	1
sp|P32367|TFC1_YEAST	1	1	0	0	1	1
sp|P32368|SAC1_YEAST	1	1	1	1	1	1
sp|P32377|MVD1_YEAST	1	1	1	0	1	1
sp|P32379|PSA5_YEAST	1	1	1	1	1	1
sp|P32380|SP110_YEAST	1	1	1	1	0	1
sp|P32381|ARP2_YEAST	1	1	0	1	1	1
sp|P32386|YBT1_YEAST	1	1	0	0	1	1
sp|P32389|MET4_YEAST	1	0	1	1	1	1
sp|P32419|MDHP_YEAST	1	1	1	0	1	1
sp|P32432|SFP1_YEAST	1	1	0	0	0	1
sp|P32445|RIM1_YEAST	1	1	0	0	0	1
sp|P32447|ASF1_YEAST	1	1	1	1	1	1
sp|P32449|AROG_YEAST	1	1	1	1	0	1
sp|P32452|PHA2_YEAST	1	1	1	0	1	1
sp|P32453|ATP11_YEAST	1	1	1	1	1	1
sp|P32454|APE2_YEAST	1	1	1	1	1	1
sp|P32457|CDC3_YEAST	1	1	1	1	1	1
sp|P32458|CDC11_YEAST	1	1	1	1	0	1
sp|P32461|DPH2_YEAST	1	1	1	1	1	1
sp|P32462|ERG24_YEAST	1	1	1	1	1	1
sp|P32463|ACPM_YEAST	1	1	1	1	1	1
sp|P32465|HXT1_YEAST	1	1	1	1	1	1
sp|P32466|HXT3_YEAST	1	1	1	0	1	1
sp|P32468|CDC12_YEAST	1	1	0	1	1	1
sp|P32469|DPH5_YEAST	1	1	1	1	0	1
sp|P32471|EF1B_YEAST	1	1	1	1	1	1
sp|P32472|FKBP2_YEAST	1	1	0	1	1	1
sp|P32473|ODPB_YEAST	1	1	1	1	1	1
sp|P32474|EUG1_YEAST	1	1	1	0	1	1
sp|P32476|ERG1_YEAST	1	1	1	0	0	1
sp|P32477|GSH1_YEAST	1	1	0	1	1	1
sp|P32478|HS150_YEAST	1	1	1	1	1	1
sp|P32480|HIR2_YEAST	1	1	1	0	0	1
sp|P32481|IF2G_YEAST	1	1	1	1	1	1
sp|P32485|HOG1_YEAST	1	1	1	0	1	1
sp|P32486|KRE6_YEAST	1	1	0	1	1	1
sp|P32488|ISF1_YEAST	1	1	0	1	1	1
sp|P32492|MYO4_YEAST	1	1	0	0	0	1
sp|P32494|NGG1_YEAST	1	1	1	1	1	1
sp|P32495|NHP2_YEAST	1	1	0	0	1	1
sp|P32496|RPN12_YEAST	1	0	0	1	1	1
sp|P32497|EIF3C_YEAST	1	1	1	0	0	1
sp|P32499|NUP2_YEAST	1	1	1	1	1	1
sp|P32500|NDC1_YEAST	1	1	1	1	0	1
sp|P32501|EI2BE_YEAST	1	1	1	1	1	1
sp|P32502|EI2BB_YEAST	1	1	1	1	1	1
sp|P32504|CBF3A_YEAST	1	0	0	0	1	0
sp|P32505|NAB2_YEAST	1	1	1	1	1	1
sp|P32521|PAN1_YEAST	1	1	0	0	0	1
sp|P32523|PRP19_YEAST	1	1	1	1	1	1
sp|P32524|PRP21_YEAST	1	1	0	0	0	0
sp|P32525|ECM25_YEAST	1	1	1	0	0	1
sp|P32527|ZUO1_YEAST	1	1	1	1	1	1
sp|P32528|DUR1_YEAST	1	1	1	1	1	1
sp|P32529|RPA12_YEAST	1	1	0	0	0	1
sp|P32558|SPT16_YEAST	1	1	1	0	0	1
sp|P32561|RPD3_YEAST	1	1	1	1	0	1
sp|P32563|VPP1_YEAST	1	1	1	1	1	1
sp|P32565|RPN2_YEAST	1	1	1	1	1	1
sp|P32566|SMI1_YEAST	1	1	1	0	0	1
sp|P32567|PAH1_YEAST	1	1	0	1	0	1
sp|P32568|SNQ2_YEAST	1	1	0	0	1	1
sp|P32569|MED17_YEAST	1	0	0	0	0	0
sp|P32570|MED22_YEAST	1	1	0	0	0	0
sp|P32571|UBP4_YEAST	1	1	0	1	0	1
sp|P32573|SPS19_YEAST	1	0	0	0	0	0
sp|P32578|SIP1_YEAST	1	1	0	1	0	1
sp|P32579|SUA5_YEAST	1	1	1	1	1	1
sp|P32582|CBS_YEAST	1	1	1	1	1	1
sp|P32583|SRP40_YEAST	1	1	1	1	1	1
sp|P32584|STE14_YEAST	1	1	1	0	0	1
sp|P32585|MED18_YEAST	1	1	1	0	1	1
sp|P32588|PUB1_YEAST	1	1	0	0	0	0
sp|P32589|HSP7F_YEAST	1	1	1	1	0	1
sp|P32590|HSP79_YEAST	1	1	1	1	1	1
sp|P32591|SWI3_YEAST	1	1	0	1	1	1
sp|P32597|STH1_YEAST	1	1	1	1	1	1
sp|P32598|PP12_YEAST	1	1	1	0	0	1
sp|P32599|FIMB_YEAST	1	1	1	0	1	1
sp|P32600|TOR2_YEAST	1	1	0	0	0	1
sp|P32602|SEC17_YEAST	1	1	1	1	1	1
sp|P32604|F26_YEAST	1	1	0	0	0	1
sp|P32608|RTG2_YEAST	1	1	0	0	1	1
sp|P32609|PEP7_YEAST	1	0	0	0	1	1
sp|P32610|VATD_YEAST	1	1	1	1	1	1
sp|P32614|FRDS_YEAST	1	1	1	1	1	1
sp|P32617|IES6_YEAST	1	1	1	1	1	1
sp|P32618|YEF3_YEAST	1	1	0	0	1	1
sp|P32621|GDA1_YEAST	1	1	1	1	1	1
sp|P32623|CRH2_YEAST	1	1	0	0	1	1
sp|P32626|ENOPH_YEAST	1	1	1	1	1	1
sp|P32628|RAD23_YEAST	1	1	0	1	0	1
sp|P32629|ANP1_YEAST	1	0	0	0	0	0
sp|P32634|PMD1_YEAST	1	0	0	0	0	0
sp|P32639|BRR2_YEAST	1	1	0	0	0	1
sp|P32642|GLRX4_YEAST	1	1	1	1	1	1
sp|P32643|TMT1_YEAST	1	1	0	1	1	1
sp|P32644|ECM32_YEAST	1	1	0	0	1	1
sp|P32657|CHD1_YEAST	1	1	0	1	1	1
sp|P32660|ATC5_YEAST	1	1	0	0	1	1
sp|P32680|YJAG_ECOLI	1	1	1	1	0	1
sp|P32684|RLUF_ECOLI	1	1	1	1	1	1
sp|P32695|DUSA_ECOLI	1	0	0	0	0	1
sp|P32705|ACTP_ECOLI	1	0	0	0	0	0
sp|P32767|KA122_YEAST	1	1	0	0	1	1
sp|P32769|HBS1_YEAST	1	1	1	1	0	1
sp|P32770|DRI1_YEAST	1	1	1	1	0	1
sp|P32771|FADH_YEAST	1	1	1	0	0	1
sp|P32773|TOA1_YEAST	1	0	0	0	0	0
sp|P32774|T2AG_YEAST	1	1	1	1	1	1
sp|P32775|GLGB_YEAST	1	1	1	1	0	1
sp|P32776|TFB1_YEAST	1	1	1	1	1	1
sp|P32783|MCES_YEAST	1	0	0	0	0	0
sp|P32784|GPT1_YEAST	1	1	1	0	0	1
sp|P32787|MG101_YEAST	1	1	1	0	0	1
sp|P32790|SLA1_YEAST	1	0	0	0	0	0
sp|P32792|YHH7_YEAST	1	1	0	0	0	1
sp|P32793|YSC84_YEAST	1	1	1	1	1	1
sp|P32794|AFG2_YEAST	1	1	1	0	0	1
sp|P32795|YME1_YEAST	1	1	1	1	0	1
sp|P32796|CACP_YEAST	1	1	1	1	1	1
sp|P32797|CDC13_YEAST	1	1	1	1	0	1
sp|P32798|COT1_YEAST	1	1	1	1	1	1
sp|P32802|TMN1_YEAST	1	1	0	0	1	1
sp|P32803|EMP24_YEAST	1	1	1	1	1	1
sp|P32806|GYP6_YEAST	1	1	0	0	0	1
sp|P32829|MRE11_YEAST	1	0	0	1	0	0
sp|P32831|NGR1_YEAST	1	1	0	1	1	1
sp|P32832|RSC7_YEAST	1	1	0	0	0	1
sp|P32838|PP2A4_YEAST	1	0	0	0	0	0
sp|P32843|YME2_YEAST	1	1	0	0	0	1
sp|P32844|SEC6_YEAST	1	0	1	0	0	0
sp|P32854|PEP12_YEAST	1	0	0	0	0	0
sp|P32855|SEC8_YEAST	1	1	1	1	1	1
sp|P32857|PTM1_YEAST	1	1	1	1	0	1
sp|P32860|NFU1_YEAST	1	1	0	0	0	1
sp|P32861|UGPA1_YEAST	1	1	0	1	1	1
sp|P32862|RGT1_YEAST	1	1	1	1	1	1
sp|P32864|RAEP_YEAST	1	1	0	1	0	1
sp|P32867|SSO1_YEAST	1	1	1	1	1	1
sp|P32873|BEM3_YEAST	1	1	0	0	1	1
sp|P32875|LIPA_YEAST	1	1	1	1	1	1
sp|P32891|DLD1_YEAST	1	1	1	1	0	1
sp|P32892|DRS1_YEAST	1	1	0	1	1	1
sp|P32893|TRS65_YEAST	1	1	0	0	0	1
sp|P32895|KPR1_YEAST	1	1	0	0	0	1
sp|P32896|PDC2_YEAST	1	1	1	1	0	1
sp|P32897|TIM23_YEAST	1	1	1	1	1	1
sp|P32898|PREP_YEAST	1	1	1	1	0	1
sp|P32899|IMP3_YEAST	1	1	0	1	0	1
sp|P32900|SKG6_YEAST	1	1	1	1	1	1
sp|P32901|PTR2_YEAST	1	0	0	0	0	0
sp|P32902|RT04_YEAST	1	1	1	0	1	1
sp|P32904|RM06_YEAST	1	0	0	0	0	0
sp|P32906|MNS1_YEAST	1	1	1	1	0	1
sp|P32907|ATO2_YEAST	1	0	0	0	0	0
sp|P32908|SMC1_YEAST	1	0	0	0	0	0
sp|P32909|SMY2_YEAST	1	1	1	0	0	1
sp|P32910|RPC6_YEAST	1	0	0	0	0	0
sp|P32911|SUI1_YEAST	1	1	1	1	1	1
sp|P32912|VAM7_YEAST	1	1	1	0	0	1
sp|P32913|VPS17_YEAST	1	1	1	1	1	1
sp|P32914|SPT4_YEAST	1	1	0	0	0	1
sp|P32915|SC61A_YEAST	1	1	1	1	1	1
sp|P32916|SRPR_YEAST	1	1	0	0	0	1
sp|P32917|STE5_YEAST	1	0	0	0	0	0
sp|P32939|YPT7_YEAST	1	1	0	1	1	1
sp|P33136|OPGG_ECOLI	1	1	1	0	0	1
sp|P33195|GCSP_ECOLI	1	1	1	1	1	1
sp|P33201|MRT4_YEAST	1	1	0	1	1	1
sp|P33202|UFD4_YEAST	1	1	1	0	1	1
sp|P33203|PRP40_YEAST	1	0	0	0	1	1
sp|P33204|ARPC4_YEAST	1	1	1	0	0	1
sp|P33219|YEBF_ECOLI	1	1	1	1	1	1
sp|P33221|PURT_ECOLI	1	1	1	1	1	1
sp|P33226|TORC_ECOLI	1	0	0	0	1	1
sp|P33297|PRS6A_YEAST	1	1	1	0	1	1
sp|P33298|PRS6B_YEAST	1	1	1	1	0	1
sp|P33299|PRS7_YEAST	1	1	0	1	1	1
sp|P33302|PDR5_YEAST	1	1	0	0	1	1
sp|P33307|CSE1_YEAST	1	1	0	0	1	1
sp|P33308|MED9_YEAST	1	1	0	0	0	1
sp|P33309|DOM34_YEAST	1	1	0	0	0	1
sp|P33313|CNS1_YEAST	1	1	1	1	0	1
sp|P33314|BUD2_YEAST	1	0	0	0	0	0
sp|P33315|TKT2_YEAST	1	1	1	0	1	1
sp|P33317|DUT_YEAST	1	1	1	1	1	1
sp|P33322|CBF5_YEAST	1	1	1	1	1	1
sp|P33324|YKJ1_YEAST	1	1	1	1	1	1
sp|P33327|DHE2_YEAST	1	1	1	1	1	1
sp|P33328|SNC2_YEAST	1	0	0	0	0	0
sp|P33329|PPZ2_YEAST	1	1	1	1	1	1
sp|P33330|SERC_YEAST	1	1	1	1	1	1
sp|P33331|NTF2_YEAST	1	1	1	1	0	1
sp|P33332|SEC3_YEAST	1	1	0	1	1	1
sp|P33333|PLSC_YEAST	1	1	1	1	1	1
sp|P33334|PRP8_YEAST	1	1	0	0	0	1
sp|P33336|SKN1_YEAST	1	1	1	1	1	1
sp|P33338|SLA2_YEAST	1	1	1	1	1	1
sp|P33339|TFC4_YEAST	1	1	0	1	1	1
sp|P33362|YEHZ_ECOLI	1	1	1	1	1	1
sp|P33363|BGLX_ECOLI	1	1	1	1	1	1
sp|P33368|YOHF_ECOLI	1	1	1	0	0	1
sp|P33399|LHP1_YEAST	1	1	0	1	1	1
sp|P33401|PGM1_YEAST	1	1	1	1	1	1
sp|P33412|ECT1_YEAST	1	1	1	0	0	1
sp|P33416|HSP78_YEAST	1	1	1	0	1	1
sp|P33417|IXR1_YEAST	1	1	0	0	1	1
sp|P33418|XPOT_YEAST	1	1	1	0	1	1
sp|P33421|SDH3_YEAST	1	0	0	0	0	0
sp|P33441|MFT1_YEAST	1	1	0	0	0	1
sp|P33442|RS3A1_YEAST	1	1	1	1	1	1
sp|P33570|TKT2_ECOLI	1	1	1	0	0	1
sp|P33599|NUOCD_ECOLI	1	1	1	0	0	1
sp|P33602|NUOG_ECOLI	1	1	1	1	0	1
sp|P33643|RLUD_ECOLI	1	0	1	1	1	1
sp|P33644|PURNU_ECOLI	1	1	1	1	1	1
sp|P33734|HIS5_YEAST	1	1	1	1	1	1
sp|P33748|MSN2_YEAST	1	1	0	0	0	1
sp|P33750|DCA13_YEAST	1	1	0	1	0	1
sp|P33753|TRM2_YEAST	1	1	0	0	0	1
sp|P33754|SEC66_YEAST	1	1	0	0	1	1
sp|P33755|NPL4_YEAST	1	1	0	1	1	1
sp|P33767|OSTB_YEAST	1	1	1	1	1	1
sp|P33775|PMT1_YEAST	1	1	1	1	1	1
sp|P33891|TIP20_YEAST	1	1	1	0	0	1
sp|P33892|GCN1_YEAST	1	1	1	1	1	1
sp|P33895|NUF2_YEAST	1	1	1	1	1	1
sp|P33920|NDPA_ECOLI	1	1	1	0	1	1
sp|P34072|MKS1_YEAST	1	1	1	1	1	1
sp|P34077|NIC96_YEAST	1	1	0	0	1	1
sp|P34078|LTV1_YEAST	1	1	0	0	0	1
sp|P34087|RPB7_YEAST	1	0	0	0	0	0
sp|P34110|VPS35_YEAST	1	1	1	0	1	1
sp|P34111|TFC3_YEAST	1	1	1	1	1	1
sp|P34160|NCBP1_YEAST	1	1	0	0	1	1
sp|P34162|MED20_YEAST	1	1	1	0	0	1
sp|P34163|TGL1_YEAST	1	1	1	1	1	1
sp|P34164|SIP2_YEAST	1	1	0	0	0	1
sp|P34167|IF4B_YEAST	1	1	0	0	0	1
sp|P34209|YDCF_ECOLI	1	0	0	0	0	1
sp|P34216|EDE1_YEAST	1	1	1	0	0	1
sp|P34217|PIN4_YEAST	1	1	1	1	1	1
sp|P34220|YBF5_YEAST	1	1	1	1	1	1
sp|P34221|PP2C3_YEAST	1	1	1	0	0	1
sp|P34223|UBX1_YEAST	1	1	1	1	1	1
sp|P34226|SKT5_YEAST	1	1	0	0	0	1
sp|P34227|PRX1_YEAST	1	1	1	1	1	1
sp|P34231|YKS7_YEAST	1	0	0	1	0	0
sp|P34232|MTR2_YEAST	1	1	1	0	1	1
sp|P34237|CASP_YEAST	1	1	1	1	0	1
sp|P34240|ZRT3_YEAST	1	1	1	1	1	1
sp|P34241|URB1_YEAST	1	1	0	1	1	1
sp|P34243|HCS1_YEAST	1	1	0	0	0	1
sp|P34244|HSL1_YEAST	1	0	0	0	1	0
sp|P34247|UTP11_YEAST	1	1	0	0	1	1
sp|P34248|YKK0_YEAST	1	0	0	0	1	1
sp|P34250|SEG2_YEAST	1	1	1	0	0	1
sp|P34253|KTI12_YEAST	1	1	0	0	1	1
sp|P34730|BMH2_YEAST	1	0	0	1	1	0
sp|P34756|FAB1_YEAST	1	1	0	0	1	1
sp|P34758|SCD5_YEAST	1	1	1	0	0	1
sp|P34760|TSA1_YEAST	1	1	0	0	0	1
sp|P34761|WHI3_YEAST	1	1	1	1	1	1
sp|P34909|NOT4_YEAST	1	1	1	1	1	1
sp|P35056|PEX5_YEAST	1	1	0	1	1	1
sp|P35127|UBL1_YEAST	1	1	0	0	0	0
sp|P35169|TOR1_YEAST	1	1	0	1	0	1
sp|P35176|CYPD_YEAST	1	1	1	1	1	1
sp|P35177|SPT7_YEAST	1	0	0	0	0	0
sp|P35178|RRP1_YEAST	1	1	0	0	0	0
sp|P35180|TOM20_YEAST	1	0	0	1	1	1
sp|P35181|AP1S1_YEAST	1	1	0	0	1	1
sp|P35182|PP2C1_YEAST	1	0	1	0	0	0
sp|P35183|AST1_YEAST	1	1	0	0	0	1
sp|P35184|SQT1_YEAST	1	1	1	1	1	1
sp|P35189|TAF14_YEAST	1	1	1	1	0	1
sp|P35191|MDJ1_YEAST	1	1	1	1	1	1
sp|P35193|ATG19_YEAST	1	1	0	0	0	0
sp|P35194|UTP20_YEAST	1	1	1	0	0	1
sp|P35196|RER2_YEAST	1	1	1	1	0	1
sp|P35197|GCS1_YEAST	1	1	1	0	1	1
sp|P35201|CENPC_YEAST	1	1	0	0	0	1
sp|P35202|THI80_YEAST	1	1	1	0	1	1
sp|P35206|CSG2_YEAST	1	1	1	1	1	1
sp|P35207|SKI2_YEAST	1	1	0	1	1	1
sp|P35210|SPT23_YEAST	1	0	0	0	0	0
sp|P35340|AHPF_ECOLI	1	1	1	1	0	1
sp|P35688|LRG1_YEAST	1	1	0	0	0	1
sp|P35691|TCTP_YEAST	1	0	0	0	0	0
sp|P35718|RPC8_YEAST	1	1	1	1	1	1
sp|P35719|MRP8_YEAST	1	1	1	1	1	1
sp|P35723|YET1_YEAST	1	0	0	0	0	0
sp|P35724|MNR2_YEAST	1	1	1	1	1	1
sp|P35725|YKG3_YEAST	1	1	1	1	0	1
sp|P35728|MPE1_YEAST	1	0	0	0	1	0
sp|P35729|NU120_YEAST	1	1	0	0	0	1
sp|P35732|DEF1_YEAST	1	1	1	1	0	1
sp|P35734|ASK1_YEAST	1	0	1	0	0	1
sp|P35735|SFK1_YEAST	1	0	1	1	1	1
sp|P35817|BDF1_YEAST	1	1	0	1	1	1
sp|P35844|KES1_YEAST	1	1	1	0	0	1
sp|P35845|OSH1_YEAST	1	1	1	0	0	1
sp|P35996|RM38_YEAST	1	0	0	0	0	1
sp|P35997|RS27A_YEAST	1	0	0	0	1	1
sp|P36000|AP1B1_YEAST	1	1	0	0	0	1
sp|P36001|FOLC_YEAST	1	0	0	0	0	0
sp|P36003|NNK1_YEAST	1	1	0	0	0	0
sp|P36006|MYO3_YEAST	1	1	1	0	0	1
sp|P36007|LTHAD_YEAST	1	1	1	1	0	1
sp|P36008|EF1G2_YEAST	1	1	0	0	0	1
sp|P36009|DHR2_YEAST	1	1	1	0	0	1
sp|P36010|NDK_YEAST	1	1	1	1	1	1
sp|P36013|MAOM_YEAST	1	1	1	0	1	1
sp|P36014|GPX1_YEAST	1	1	1	1	1	1
sp|P36015|YKT6_YEAST	1	1	1	1	1	1
sp|P36016|LHS1_YEAST	1	1	1	1	1	1
sp|P36017|VPS21_YEAST	1	0	0	0	0	0
sp|P36018|YPT52_YEAST	1	1	1	1	0	1
sp|P36022|DYHC_YEAST	1	0	0	1	1	1
sp|P36023|OAF3_YEAST	1	1	0	0	0	0
sp|P36024|SIS2_YEAST	1	1	1	0	0	1
sp|P36027|MID2_YEAST	1	0	0	0	0	0
sp|P36029|TPO5_YEAST	1	1	0	0	0	1
sp|P36035|JEN1_YEAST	1	1	0	1	1	1
sp|P36036|YRA2_YEAST	1	1	1	1	1	1
sp|P36037|DOA1_YEAST	1	1	1	0	0	1
sp|P36039|EMC3_YEAST	1	0	0	0	0	0
sp|P36040|POC2_YEAST	1	1	1	1	0	1
sp|P36041|EAP1_YEAST	1	1	1	1	1	1
sp|P36046|MIA40_YEAST	1	1	0	0	1	1
sp|P36047|SDS22_YEAST	1	0	0	1	0	0
sp|P36048|SN114_YEAST	1	1	0	0	0	1
sp|P36049|EBP2_YEAST	1	1	1	0	0	1
sp|P36051|MCD4_YEAST	1	1	0	1	1	1
sp|P36053|ELF1_YEAST	1	1	0	0	0	1
sp|P36054|RCN1_YEAST	1	1	0	0	0	0
sp|P36057|SRPB_YEAST	1	1	0	1	1	1
sp|P36059|NNRD_YEAST	1	0	0	0	0	0
sp|P36060|MCR1_YEAST	1	1	1	1	1	1
sp|P36062|AVT3_YEAST	1	1	0	0	0	1
sp|P36064|COXM1_YEAST	1	1	1	1	1	1
sp|P36068|SHE2_YEAST	1	1	1	1	1	1
sp|P36069|PMU1_YEAST	1	1	1	1	1	1
sp|P36075|CUE2_YEAST	1	0	0	0	1	1
sp|P36076|CAB3_YEAST	1	1	0	0	0	1
sp|P36077|SRX1_YEAST	1	0	0	0	0	0
sp|P36080|RRP14_YEAST	1	0	0	0	0	0
sp|P36081|PSG1_YEAST	1	0	0	0	0	0
sp|P36083|YKH5_YEAST	1	1	1	1	1	1
sp|P36084|MUD2_YEAST	1	1	1	1	1	1
sp|P36088|FRMSR_YEAST	1	1	1	1	1	1
sp|P36090|ANR2_YEAST	1	1	1	1	1	1
sp|P36091|DCW1_YEAST	1	0	0	0	0	0
sp|P36094|SPC42_YEAST	1	1	1	1	0	1
sp|P36095|VPS24_YEAST	1	0	0	0	1	0
sp|P36100|T2EA_YEAST	1	1	1	1	1	1
sp|P36101|TCD2_YEAST	1	1	1	0	0	1
sp|P36102|PAN3_YEAST	1	0	0	0	0	0
sp|P36103|YKC3_YEAST	1	1	1	1	0	1
sp|P36104|SWD2_YEAST	1	0	0	0	0	0
sp|P36105|RL14A_YEAST	1	1	0	0	1	1
sp|P36106|BYE1_YEAST	1	1	0	0	1	1
sp|P36112|MIC60_YEAST	1	0	0	0	0	0
sp|P36114|YKR18_YEAST	1	1	1	1	1	1
sp|P36116|VPS51_YEAST	1	0	0	0	0	0
sp|P36117|ALY1_YEAST	1	1	1	1	1	1
sp|P36119|RQT4_YEAST	1	1	0	0	1	1
sp|P36120|DBP7_YEAST	1	0	0	1	0	0
sp|P36121|RPC5_YEAST	1	0	0	0	0	0
sp|P36122|BCH2_YEAST	1	1	1	1	1	1
sp|P36123|SA190_YEAST	1	1	1	1	1	1
sp|P36124|SET3_YEAST	1	1	1	1	1	1
sp|P36125|GMH1_YEAST	1	1	0	1	1	1
sp|P36126|SPO14_YEAST	1	0	0	0	0	0
sp|P36130|CAF4_YEAST	1	0	0	0	0	0
sp|P36132|KAE1_YEAST	1	1	1	0	0	1
sp|P36136|SHB17_YEAST	1	1	1	1	1	1
sp|P36139|PET10_YEAST	1	1	1	1	1	1
sp|P36141|FMP46_YEAST	1	1	1	1	0	1
sp|P36143|GLG1_YEAST	1	1	1	0	0	1
sp|P36144|RL1D1_YEAST	1	0	0	0	0	0
sp|P36145|T2EB_YEAST	1	1	1	0	1	1
sp|P36146|LAS1_YEAST	1	1	0	0	0	1
sp|P36147|PAM17_YEAST	1	1	1	1	1	1
sp|P36148|GPT2_YEAST	1	1	1	1	0	1
sp|P36151|YK50_YEAST	1	1	1	1	1	1
sp|P36152|DRE2_YEAST	1	1	1	1	0	1
sp|P36154|AIM29_YEAST	1	0	0	0	1	1
sp|P36156|GTO2_YEAST	1	1	1	0	0	1
sp|P36158|YK58_YEAST	1	0	0	0	0	0
sp|P36159|RNZ_YEAST	1	0	0	0	0	0
sp|P36160|RPF2_YEAST	1	1	1	1	0	1
sp|P36161|NU133_YEAST	1	1	0	0	0	1
sp|P36162|DAD2_YEAST	1	1	1	1	1	1
sp|P36163|OMA1_YEAST	1	1	1	1	1	1
sp|P36165|TGL4_YEAST	1	1	1	1	1	1
sp|P36166|PXL1_YEAST	1	1	0	1	0	1
sp|P36168|ESL2_YEAST	1	1	1	1	1	1
sp|P36169|SKG1_YEAST	1	1	1	0	1	1
sp|P36421|SYYC_YEAST	1	1	1	1	0	1
sp|P36516|RM03_YEAST	1	1	0	0	1	1
sp|P36521|RM11_YEAST	1	1	1	1	1	1
sp|P36523|RM15_YEAST	1	1	1	1	1	1
sp|P36528|RM17_YEAST	1	1	1	1	1	1
sp|P36533|RM39_YEAST	1	0	0	0	0	0
sp|P36680|ZAPD_ECOLI	1	0	0	0	0	0
sp|P36683|ACNB_ECOLI	1	1	1	1	1	1
sp|P36767|RDGC_ECOLI	1	1	1	1	1	1
sp|P36775|LONM_YEAST	1	1	1	0	0	1
sp|P36929|RSMB_ECOLI	1	1	1	1	1	1
sp|P36938|PGM_ECOLI	1	1	1	1	1	1
sp|P36973|APT2_YEAST	1	1	1	1	1	1
sp|P37005|LAST_ECOLI	1	1	1	1	0	1
sp|P37012|PGM2_YEAST	1	1	1	1	1	1
sp|P37020|GEF1_YEAST	1	1	1	1	1	1
sp|P37051|PURU_ECOLI	1	1	1	1	1	1
sp|P37095|PEPB_ECOLI	1	1	1	1	0	1
sp|P37254|ADCS_YEAST	1	1	1	1	1	1
sp|P37262|SOL2_YEAST	1	0	0	0	0	0
sp|P37263|YC16_YEAST	1	1	1	1	0	1
sp|P37267|CBP4_YEAST	1	1	0	0	0	1
sp|P37291|GLYC_YEAST	1	1	1	1	1	1
sp|P37292|GLYM_YEAST	1	1	0	1	1	1
sp|P37293|NAT2_YEAST	1	1	1	0	0	1
sp|P37296|VPP2_YEAST	1	1	1	1	1	1
sp|P37297|STT4_YEAST	1	1	0	0	0	1
sp|P37302|APE3_YEAST	1	1	1	1	1	1
sp|P37303|GLY1_YEAST	1	1	1	1	1	1
sp|P37304|PAM1_YEAST	1	1	1	1	1	1
sp|P37329|MODA_ECOLI	1	1	1	0	0	1
sp|P37330|MASZ_ECOLI	1	1	1	1	1	1
sp|P37349|DHAM_ECOLI	1	1	1	1	0	1
sp|P37366|CCL1_YEAST	1	0	0	1	1	0
sp|P37370|VRP1_YEAST	1	1	1	1	1	1
sp|P37387|XYLF_ECOLI	1	1	1	1	1	1
sp|P37634|RLMJ_ECOLI	1	1	0	0	0	0
sp|P37637|MDTF_ECOLI	1	0	0	0	0	0
sp|P37647|KDGK_ECOLI	1	1	1	1	1	1
sp|P37648|YHJJ_ECOLI	1	1	1	0	0	1
sp|P37666|GHRB_ECOLI	1	1	1	1	0	1
sp|P37671|YIAJ_ECOLI	1	0	0	0	0	0
sp|P37677|LYXK_ECOLI	1	0	0	0	1	0
sp|P37685|ALDB_ECOLI	1	1	1	1	1	1
sp|P37689|GPMI_ECOLI	1	1	1	1	0	1
sp|P37744|RMLA1_ECOLI	1	1	1	0	0	1
sp|P37745|RMLC_ECOLI	1	1	1	1	1	1
sp|P37747|GLF_ECOLI	1	1	1	1	0	1
sp|P37757|YDDE_ECOLI	1	0	0	0	0	1
sp|P37759|RMLB1_ECOLI	1	1	1	1	0	1
sp|P37765|RLUB_ECOLI	1	1	0	0	0	1
sp|P37769|KDUD_ECOLI	1	1	1	1	1	1
sp|P37838|NOP4_YEAST	1	1	1	0	0	1
sp|P37898|AAP1_YEAST	1	1	0	0	1	1
sp|P37902|GLTI_ECOLI	1	1	1	1	1	1
sp|P37903|USPF_ECOLI	1	1	1	1	1	1
sp|P38009|PUR92_YEAST	1	1	1	1	0	1
sp|P38011|GBLP_YEAST	1	1	1	1	1	1
sp|P38013|AHP1_YEAST	1	1	0	0	0	1
sp|P38038|CYSJ_ECOLI	1	1	1	1	1	1
sp|P38041|BOB1_YEAST	1	1	1	1	1	1
sp|P38061|RL32_YEAST	1	1	1	1	1	1
sp|P38063|KPR4_YEAST	1	1	0	0	1	1
sp|P38065|AP2A_YEAST	1	1	0	0	0	1
sp|P38066|RIB1_YEAST	1	1	1	1	0	1
sp|P38067|UGA2_YEAST	1	1	1	0	0	1
sp|P38068|GLRX7_YEAST	1	0	0	1	0	0
sp|P38069|MNN2_YEAST	1	1	1	0	1	1
sp|P38070|YPK3_YEAST	1	1	0	0	0	1
sp|P38071|ETR1_YEAST	1	1	1	1	0	1
sp|P38072|SCO2_YEAST	1	1	0	0	1	1
sp|P38074|HMT1_YEAST	1	1	0	1	1	1
sp|P38075|PDX3_YEAST	1	1	1	1	1	1
sp|P38077|ATPG_YEAST	1	1	1	0	1	1
sp|P38079|YRO2_YEAST	1	1	1	1	1	1
sp|P38080|AKL1_YEAST	1	1	0	0	0	1
sp|P38081|YBQ6_YEAST	1	1	1	1	1	1
sp|P38086|RDH54_YEAST	1	1	1	1	1	1
sp|P38088|SYG_YEAST	1	1	1	0	0	1
sp|P38089|PP2C4_YEAST	1	1	1	1	0	1
sp|P38109|ATG42_YEAST	1	1	1	1	1	1
sp|P38110|ATM_YEAST	1	0	0	0	0	0
sp|P38112|MAK5_YEAST	1	1	1	1	1	1
sp|P38113|ADH5_YEAST	1	1	1	0	1	1
sp|P38115|ARA1_YEAST	1	1	1	1	1	1
sp|P38116|ARL1_YEAST	1	0	0	0	0	0
sp|P38121|DPOA2_YEAST	1	1	1	0	0	1
sp|P38122|PANB_YEAST	1	0	0	0	0	0
sp|P38123|SWD3_YEAST	1	1	1	1	1	1
sp|P38129|TAF5_YEAST	1	1	0	0	1	1
sp|P38130|KTR3_YEAST	1	1	1	1	1	1
[truncated: 3,104 more rows]
