# Supplementary material
Source: Research Square preprint supplement (doi:10.21203/rs.3.rs-9367379/v1)
Supplement: Supplementary file 7 [file d57e672ae0a12da03cf520d6.xlsx]

## Sheet: DDA_metrics
Supp.Data1.Tab1 Complementarity metrics of DDA datasets
views	platform	view_pearson	missing_complementary	DEA_pearson
dlfq_maxlfq	FragPipe	0.861893	0.206567	0.906002
dlfq_top0	FragPipe	0.593757	0.00428701	0.724933
dlfq_top3	FragPipe	0.589854	0.005121	0.751465
dlfq_count	FragPipe	0.325739	0.132151	0.567371
maxlfq_top0	FragPipe	0.616987	0.210063	0.689598
maxlfq_top3	FragPipe	0.616365	0.209464	0.72496
maxlfq_count	FragPipe	0.326891	0.197056	0.582166
top0_top3	FragPipe	0.765172	0.000892518	0.855556
top0_count	FragPipe	0.376324	0.128683	0.573297
top3_count	FragPipe	0.339665	0.129196	0.541373
dlfq_maxlfq	FragPipe	0.755435	0.142368	0.82231
dlfq_top0	FragPipe	0.502426	0.0259944	0.721743
dlfq_top3	FragPipe	0.498515	0.0291617	0.724787
dlfq_count	FragPipe	0.325776	0.118591	0.547234
maxlfq_top0	FragPipe	0.535686	0.164802	0.729741
maxlfq_top3	FragPipe	0.571674	0.158522	0.736301
maxlfq_count	FragPipe	0.336451	0.247066	0.586429
top0_top3	FragPipe	0.675648	0.010884	0.861827
top0_count	FragPipe	0.447466	0.0936307	0.598621
top3_count	FragPipe	0.363717	0.104107	0.575122
dlfq_maxlfq	FragPipe	0.824887	0.173849	0.827857
dlfq_top0	FragPipe	0.598326	0.0141072	0.672333
dlfq_top3	FragPipe	0.587642	0.0115139	0.655898
dlfq_count	FragPipe	0.409325	0.0710176	0.532435
maxlfq_top0	FragPipe	0.65442	0.182458	0.669708
maxlfq_top3	FragPipe	0.635983	0.181466	0.649768
maxlfq_count	FragPipe	0.439227	0.159685	0.569808
top0_top3	FragPipe	0.754231	0.00537078	0.810473
top0_count	FragPipe	0.469128	0.0623946	0.557665
top3_count	FragPipe	0.416148	0.0642935	0.516212
dlfq_maxlfq	FragPipe	0.645959	0.212307	0.753689
dlfq_top0	FragPipe	0.566954	0.0210036	0.545841
dlfq_top3	FragPipe	0.575112	0.0267938	0.520953
dlfq_count	FragPipe	0.457058	0.0707312	0.247837
maxlfq_top0	FragPipe	0.599607	0.233311	0.564748
maxlfq_top3	FragPipe	0.608517	0.229337	0.538014
maxlfq_count	FragPipe	0.442179	0.276453	0.279399
top0_top3	FragPipe	0.805632	0.0112398	0.817429
top0_count	FragPipe	0.617537	0.0504087	0.484997
top3_count	FragPipe	0.519449	0.0616485	0.364559
dlfq_maxlfq	FragPipe	0.855557	0.177425	0.835143
dlfq_top0	FragPipe	0.54155	0.00949196	0.602169
dlfq_top3	FragPipe	0.55172	0.0106067	0.604863
dlfq_count	FragPipe	0.378089	0.135041	0.489898
maxlfq_top0	FragPipe	0.543923	0.186051	0.58377
maxlfq_top3	FragPipe	0.584638	0.184676	0.60312
maxlfq_count	FragPipe	0.387377	0.209732	0.542495
top0_top3	FragPipe	0.706075	0.00215382	0.787655
top0_count	FragPipe	0.433931	0.127736	0.537857
top3_count	FragPipe	0.385684	0.12937	0.473619
dlfq_maxlfq	FragPipe	0.734404	0.202263	0.777344
dlfq_top0	FragPipe	0.616554	0.00713664	0.578698
dlfq_top3	FragPipe	0.615957	0.0078329	0.557849
dlfq_count	FragPipe	0.453396	0.170235	0.325328
maxlfq_top0	FragPipe	0.674616	0.209399	0.598206
maxlfq_top3	FragPipe	0.6731	0.208703	0.597303
maxlfq_count	FragPipe	0.468877	0.147084	0.364983
top0_top3	FragPipe	0.815157	0.00121845	0.798378
top0_count	FragPipe	0.487759	0.169713	0.359226
top3_count	FragPipe	0.457337	0.170061	0.313916
dlfq_maxlfq	FragPipe	0.851471	0.230336	0.833489
dlfq_top0	FragPipe	0.599775	0.0117783	0.695618
dlfq_top3	FragPipe	0.574637	0.0128642	0.68625
dlfq_count	FragPipe	0.295013	0.122026	0.492744
maxlfq_top0	FragPipe	0.648094	0.24178	0.682242
maxlfq_top3	FragPipe	0.629227	0.24036	0.668492
maxlfq_count	FragPipe	0.307748	0.208383	0.53736
top0_top3	FragPipe	0.827266	0.00195469	0.893877
top0_count	FragPipe	0.392529	0.113088	0.538841
top3_count	FragPipe	0.329042	0.114074	0.490171
dlfq_maxlfq	FragPipe	0.905756	0.209717	0.917705
dlfq_top0	FragPipe	0.701445	0.00578792	0.703527
dlfq_top3	FragPipe	0.701091	0.00223912	0.69845
dlfq_count	FragPipe	0.489781	0.198902	0.279329
maxlfq_top0	FragPipe	0.707071	0.209506	0.668425
maxlfq_top3	FragPipe	0.700584	0.211027	0.659044
maxlfq_count	FragPipe	0.494538	0.172201	0.32263
top0_top3	FragPipe	0.820639	0.00405577	0.868281
top0_count	FragPipe	0.483466	0.195142	0.291098
top3_count	FragPipe	0.486199	0.197254	0.253906
dlfq_maxlfq	FragPipe	0.86125	0.154511	0.87034
dlfq_top0	FragPipe	0.692327	0.00329273	0.706837
dlfq_top3	FragPipe	0.683704	0.00163399	0.670261
dlfq_count	FragPipe	0.475561	0.120692	0.453322
maxlfq_top0	FragPipe	0.729305	0.156417	0.689741
maxlfq_top3	FragPipe	0.703983	0.156095	0.633367
maxlfq_count	FragPipe	0.497883	0.132303	0.459895
top0_top3	FragPipe	0.80835	0.00170826	0.800452
top0_count	FragPipe	0.497866	0.119628	0.44539
top3_count	FragPipe	0.470225	0.119603	0.390095
dlfq_maxlfq	FragPipe	0.810554	0.161402	0.867469
dlfq_top0	FragPipe	0.617448	0.0120731	0.763138
dlfq_top3	FragPipe	0.600112	0.0126645	0.753002
dlfq_count	FragPipe	0.397446	0.119269	0.521916
maxlfq_top0	FragPipe	0.644991	0.171767	0.75387
maxlfq_top3	FragPipe	0.637524	0.170978	0.74854
maxlfq_count	FragPipe	0.405384	0.167956	0.549606
top0_top3	FragPipe	0.758041	0.00124838	0.874018
top0_count	FragPipe	0.423258	0.111598	0.542888
top3_count	FragPipe	0.397778	0.112387	0.516299
dlfq_maxlfq	FragPipe	0.870395	0.169424	0.853096
dlfq_top0	FragPipe	0.69499	0.0107891	0.716058
dlfq_top3	FragPipe	0.703947	0.00793915	0.696673
dlfq_count	FragPipe	0.514408	0.106244	0.495898
maxlfq_top0	FragPipe	0.717346	0.176771	0.736813
maxlfq_top3	FragPipe	0.713522	0.176771	0.70264
maxlfq_count	FragPipe	0.524543	0.143645	0.502196
top0_top3	FragPipe	0.801775	0.00355319	0.839013
top0_count	FragPipe	0.53667	0.098749	0.523977
top3_count	FragPipe	0.515863	0.100155	0.469147
dlfq_maxlfq	Maxquant	0.747217	0.37201	0.630732
dlfq_top0	Maxquant	0.472521	0.126566	0.710138
dlfq_top3	Maxquant	0.568702	0.128864	0.737119
dlfq_count	Maxquant	0.312689	0.286417	0.564269
maxlfq_top0	Maxquant	0.441353	0.247873	0.550572
maxlfq_top3	Maxquant	0.515997	0.246791	0.502863
maxlfq_count	Maxquant	0.351868	0.16811	0.54627
top0_top3	Maxquant	0.741868	0.00237336	0.812051
top0_count	Maxquant	0.429949	0.160762	0.562897
top3_count	Maxquant	0.348219	0.160515	0.541786
dlfq_maxlfq	Maxquant	0.753145	0.253706	0.62395
dlfq_top0	Maxquant	0.458535	0.0772444	0.748038
dlfq_top3	Maxquant	0.511485	0.0818232	0.78171
dlfq_count	Maxquant	0.322996	0.206976	0.611364
maxlfq_top0	Maxquant	0.419857	0.178845	0.524557
maxlfq_top3	Maxquant	0.449701	0.176649	0.512092
maxlfq_count	Maxquant	0.360844	0.129177	0.548202
top0_top3	Maxquant	0.765561	0.00475894	0.853353
top0_count	Maxquant	0.42155	0.130535	0.640116
top3_count	Maxquant	0.334896	0.130583	0.606768
dlfq_maxlfq	Maxquant	0.628112	0.226004	0.546529
dlfq_top0	Maxquant	0.408857	0.306877	0.523406
dlfq_top3	Maxquant	0.480359	0.30635	0.558623
dlfq_count	Maxquant	0.288749	0.0701766	0.280634
maxlfq_top0	Maxquant	0.495946	0.320594	0.574758
maxlfq_top3	Maxquant	0.596922	0.319957	0.655819
maxlfq_count	Maxquant	0.313703	0.184711	0.382507
top0_top3	Maxquant	0.756373	0.00228431	0.805364
top0_count	Maxquant	0.37906	0.2367	0.372959
top3_count	Maxquant	0.30548	0.236481	0.318196
dlfq_maxlfq	Maxquant	0.703159	0.35258	0.571088
dlfq_top0	Maxquant	0.532971	0.0703021	0.430233
dlfq_top3	Maxquant	0.555888	0.0761828	0.43818
dlfq_count	Maxquant	0.429057	0.271986	0.203082
maxlfq_top0	Maxquant	0.515173	0.288158	0.439049
maxlfq_top3	Maxquant	0.465093	0.287891	0.482648
maxlfq_count	Maxquant	0.446102	0.186447	0.26463
top0_top3	Maxquant	0.797216	0.00588078	0.726194
top0_count	Maxquant	0.479886	0.203555	0.287035
top3_count	Maxquant	0.430589	0.206228	0.198811
dlfq_maxlfq	Maxquant	0.707669	0.326098	0.570031
dlfq_top0	Maxquant	0.46396	0.106142	0.62111
dlfq_top3	Maxquant	0.559888	0.111455	0.693131
dlfq_count	Maxquant	0.371136	0.253727	0.53377
maxlfq_top0	Maxquant	0.469531	0.224863	0.519845
maxlfq_top3	Maxquant	0.526479	0.222269	0.521303
maxlfq_count	Maxquant	0.455443	0.151914	0.50098
top0_top3	Maxquant	0.67262	0.00568839	0.713572
top0_count	Maxquant	0.498051	0.149086	0.591425
top3_count	Maxquant	0.383382	0.149305	0.525516
dlfq_maxlfq	Maxquant	0.587332	0.26977	0.502306
dlfq_top0	Maxquant	0.540817	0.058142	0.525523
dlfq_top3	Maxquant	0.567885	0.0616497	0.576088
dlfq_count	Maxquant	0.435573	0.239477	0.380989
maxlfq_top0	Maxquant	0.487407	0.218219	0.56176
maxlfq_top3	Maxquant	0.523978	0.217049	0.625237
maxlfq_count	Maxquant	0.490863	0.146365	0.334449
top0_top3	Maxquant	0.843842	0.00372024	0.698976
top0_count	Maxquant	0.578726	0.183673	0.409623
top3_count	Maxquant	0.535568	0.183567	0.353429
dlfq_maxlfq	Maxquant	0.818534	0.390043	0.81842
dlfq_top0	Maxquant	0.535677	0.093002	0.751241
dlfq_top3	Maxquant	0.627396	0.0951213	0.827327
dlfq_count	Maxquant	0.303645	0.281977	0.538661
maxlfq_top0	Maxquant	0.537004	0.300324	0.690742
maxlfq_top3	Maxquant	0.586794	0.299327	0.741667
maxlfq_count	Maxquant	0.339777	0.184653	0.567038
top0_top3	Maxquant	0.766375	0.00220246	0.824389
top0_count	Maxquant	0.385169	0.190513	0.570967
top3_count	Maxquant	0.310682	0.190845	0.526359
dlfq_maxlfq	Maxquant	0.705824	0.264662	0.634082
dlfq_top0	Maxquant	0.5751	0.297676	0.36893
dlfq_top3	Maxquant	0.610777	0.296631	0.302829
dlfq_count	Maxquant	0.449149	0.13519	0.227268
maxlfq_top0	Maxquant	0.624842	0.237858	0.457119
maxlfq_top3	Maxquant	0.653769	0.237674	0.393601
maxlfq_count	Maxquant	0.485882	0.1564	0.356737
top0_top3	Maxquant	0.923958	0.00116808	0.621601
top0_count	Maxquant	0.572495	0.162486	0.366499
top3_count	Maxquant	0.516983	0.161687	0.229087
dlfq_maxlfq	Maxquant	0.658361	0.192739	0.508963
dlfq_top0	Maxquant	0.52689	0.188301	0.403699
dlfq_top3	Maxquant	0.561164	0.188116	0.415534
dlfq_count	Maxquant	0.439148	0.0744576	0.361755
maxlfq_top0	Maxquant	0.641122	0.185836	0.536848
maxlfq_top3	Maxquant	0.710377	0.185713	0.554164
maxlfq_count	Maxquant	0.47396	0.13252	0.387799
top0_top3	Maxquant	0.821199	0.000308186	0.736642
top0_count	Maxquant	0.542249	0.113844	0.373088
top3_count	Maxquant	0.480774	0.11372	0.30479
dlfq_maxlfq	Maxquant	0.770647	0.261829	0.84065
dlfq_top0	Maxquant	0.51068	0.0763048	0.636223
dlfq_top3	Maxquant	0.546996	0.0788762	0.691306
dlfq_count	Maxquant	0.374482	0.188133	0.478106
maxlfq_top0	Maxquant	0.565109	0.197181	0.673424
maxlfq_top3	Maxquant	0.58931	0.195333	0.702881
maxlfq_count	Maxquant	0.387625	0.161962	0.501673
top0_top3	Maxquant	0.80833	0.00321905	0.76967
top0_count	Maxquant	0.44027	0.114229	0.493753
top3_count	Maxquant	0.402021	0.11539	0.41667
dlfq_maxlfq	Maxquant	0.779117	0.212594	0.700054
dlfq_top0	Maxquant	0.620728	0.240248	0.487601
dlfq_top3	Maxquant	0.653927	0.240325	0.489559
dlfq_count	Maxquant	0.454842	0.093931	0.350962
maxlfq_top0	Maxquant	0.638758	0.211774	0.52076
maxlfq_top3	Maxquant	0.677191	0.211851	0.498782
maxlfq_count	Maxquant	0.475581	0.150495	0.399235
top0_top3	Maxquant	0.873855	0.00064073	0.767081
top0_count	Maxquant	0.494642	0.146317	0.377267
top3_count	Maxquant	0.473177	0.146394	0.342677

## Sheet: DIA metrics
Supp.Data1.Tab2 Complementarity metrics of DIA datasets
views	platform	view_pearson	missing_complementary	DEA_pearson
dlfq_maxlfq	DIANN	0.625576	0.0326367	0.584498
dlfq_top3	DIANN	0.517068	0.0389974	0.332257
dlfq_top1	DIANN	0.506728	0.0680751	0.232613
maxlfq_top3	DIANN	0.628437	0.00636075	0.437101
maxlfq_top1	DIANN	0.599296	0.0358928	0.281141
top3_top1	DIANN	0.747228	0.029532	0.500233
dlfq_maxlfq	DIANN	0.676453	0.0599538	0.701892
dlfq_top3	DIANN	0.473961	0.069685	0.317941
dlfq_top1	DIANN	0.469001	0.0940129	0.2325
maxlfq_top3	DIANN	0.556081	0.00973116	0.324606
maxlfq_top1	DIANN	0.533514	0.034059	0.246401
top3_top1	DIANN	0.761299	0.0243279	0.544947
dlfq_maxlfq	DIANN	0.637716	0.0828608	0.692313
dlfq_top3	DIANN	0.544254	0.0881578	0.596361
dlfq_top1	DIANN	0.51309	0.105416	0.446162
maxlfq_top3	DIANN	0.526533	0.0053964	0.502071
maxlfq_top1	DIANN	0.48815	0.0227544	0.354266
top3_top1	DIANN	0.649993	0.017358	0.628653
dlfq_maxlfq	DIANN	0.663968	0.0411345	0.590486
dlfq_top3	DIANN	0.511759	0.0530684	0.469574
dlfq_top1	DIANN	0.493233	0.0792079	0.339794
maxlfq_top3	DIANN	0.585567	0.0120295	0.42649
maxlfq_top1	DIANN	0.559026	0.038169	0.305939
top3_top1	DIANN	0.704152	0.0261396	0.588878
dlfq_maxlfq	DIANN	0.743071	0.0997332	0.815665
dlfq_top3	DIANN	0.491671	0.104902	0.721009
dlfq_top1	DIANN	0.450435	0.127745	0.611538
maxlfq_top3	DIANN	0.693401	0.00516879	0.683258
maxlfq_top1	DIANN	0.614543	0.0280115	0.574678
top3_top1	DIANN	0.820257	0.0228427	0.791545
dlfq_maxlfq	DIANN	0.716954	0.0416231	0.500618
dlfq_top3	DIANN	0.697498	0.089796	0.511498
dlfq_top1	DIANN	0.690684	0.17895	0.442508
maxlfq_top3	DIANN	0.74124	0.0484176	0.502129
maxlfq_top1	DIANN	0.724312	0.137987	0.421113
top3_top1	DIANN	0.819808	0.0895698	0.622017
dlfq_maxlfq	DIANN	0.761302	0.0475854	0.709773
dlfq_top3	DIANN	0.585141	0.0540356	0.598162
dlfq_top1	DIANN	0.527764	0.0777249	0.482691
maxlfq_top3	DIANN	0.626709	0.00645022	0.624878
maxlfq_top1	DIANN	0.548764	0.0301395	0.48632
top3_top1	DIANN	0.71299	0.0236893	0.630179
dlfq_maxlfq	Spectronaut	0.706443	0.000458086	0.52046
dlfq_top3	Spectronaut	0.513634	0.00519163	0.331469
dlfq_top1	Spectronaut	0.495124	0.0259582	0.235789
maxlfq_top3	Spectronaut	0.648699	0.00473355	0.494926
maxlfq_top1	Spectronaut	0.603846	0.0255001	0.34753
top3_top1	Spectronaut	0.751094	0.0207665	0.57491
dlfq_maxlfq	Spectronaut	0.794396	0.000561438	0.660326
dlfq_top3	Spectronaut	0.478352	0.0060154	0.309801
dlfq_top1	Spectronaut	0.453673	0.0351299	0.262891
maxlfq_top3	Spectronaut	0.576984	0.00545396	0.500317
maxlfq_top1	Spectronaut	0.527331	0.0345685	0.381568
top3_top1	Spectronaut	0.751635	0.0291145	0.623818
dlfq_maxlfq	Spectronaut	0.828371	0.000206846	0.826958
dlfq_top3	Spectronaut	0.571161	0.00530044	0.630719
dlfq_top1	Spectronaut	0.515139	0.0322422	0.49255
maxlfq_top3	Spectronaut	0.599794	0.0050936	0.602676
maxlfq_top1	Spectronaut	0.525319	0.0320354	0.456675
top3_top1	Spectronaut	0.639094	0.0269418	0.640639
dlfq_maxlfq	Spectronaut	0.81125	0.000294898	0.669821
dlfq_top3	Spectronaut	0.544402	0.00194141	0.571411
dlfq_top1	Spectronaut	0.512897	0.0160474	0.456704
maxlfq_top3	Spectronaut	0.579629	0.00164652	0.535359
maxlfq_top1	Spectronaut	0.543682	0.0157525	0.421047
top3_top1	Spectronaut	0.677052	0.014106	0.652093
dlfq_maxlfq	Spectronaut	0.829981	0.00370813	0.720442
dlfq_top3	Spectronaut	0.547672	0.00452153	0.67086
dlfq_top1	Spectronaut	0.494486	0.0150478	0.621904
maxlfq_top3	Spectronaut	0.664728	0.000813398	0.700914
maxlfq_top1	Spectronaut	0.581511	0.0113397	0.618413
top3_top1	Spectronaut	0.800577	0.0105263	0.801872
dlfq_maxlfq	Spectronaut	0.740251	0.00067281	0.499682
dlfq_top3	Spectronaut	0.730951	0.0446512	0.539935
dlfq_top1	Spectronaut	0.718592	0.132409	0.480811
maxlfq_top3	Spectronaut	0.766501	0.0439901	0.547332
maxlfq_top1	Spectronaut	0.743814	0.131748	0.488726
top3_top1	Spectronaut	0.833498	0.0877578	0.645673
dlfq_maxlfq	Spectronaut	0.914685	8.22e-05	0.891438
dlfq_top3	Spectronaut	0.656521	0.00400815	0.675017
dlfq_top1	Spectronaut	0.563958	0.0259654	0.584151
maxlfq_top3	Spectronaut	0.691968	0.00392601	0.694345
maxlfq_top1	Spectronaut	0.591584	0.0258832	0.586244
top3_top1	Spectronaut	0.736334	0.0219572	0.694204

## Sheet: DDA_statistics
Supp.Data1.Tab3 Complementarity metrics of DDA datasets
view_pair	platform	max_Pearson'R	min_Pearson'R	mean_Pearson'R	median_Pearson'R	sd_Pearson'R	max_missingrate	min_missingrate	mean_missingrate	median_missingrate	sd_missingrate	max_DEA_pearson'R	min_DEA_pearson'R	mean_DEA_pearson'R	median_DEA_pearson'R	sd_DEA_pearson'R
dlfq_maxlfq	FragPipe	0.905756	0.645959	0.816142	0.851471	0.0757233	0.230336	0.142368	0.18547	0.177425	0.0281086	0.917705	0.753689	0.842222	0.835143	0.0490798
dlfq_maxlfq	Maxquant	0.818534	0.587332	0.714465	0.707669	0.0691025	0.390043	0.192739	0.283821	0.264662	0.066515	0.84065	0.502306	0.631528	0.62395	0.11393
dlfq_top0	FragPipe	0.701445	0.502426	0.611414	0.599775	0.0640741	0.0259944	0.00329273	0.0114311	0.0107891	0.0069509	0.763138	0.545841	0.675536	0.703527	0.0690284
dlfq_top0	Maxquant	0.620728	0.408857	0.51334	0.52689	0.0593308	0.306877	0.058142	0.149164	0.106142	0.0934121	0.751241	0.36893	0.564195	0.525523	0.137612
dlfq_top3	FragPipe	0.703947	0.498515	0.607481	0.589854	0.0646669	0.0291617	0.00163399	0.0116701	0.0106067	0.00894122	0.753002	0.520953	0.665495	0.68625	0.0757125
dlfq_top3	Maxquant	0.653927	0.480359	0.567679	0.561164	0.0493112	0.30635	0.0616497	0.151399	0.111455	0.0913463	0.827327	0.302829	0.591946	0.576088	0.168166
dlfq_count	FragPipe	0.514408	0.295013	0.411054	0.409325	0.0736489	0.198902	0.0707312	0.124082	0.120692	0.0373666	0.567371	0.247837	0.450301	0.492744	0.112372
dlfq_count	Maxquant	0.454842	0.288749	0.380133	0.374482	0.0643601	0.286417	0.0701766	0.191132	0.206976	0.0843834	0.611364	0.203082	0.411896	0.380989	0.141568
maxlfq_top0	FragPipe	0.729305	0.535686	0.642913	0.648094	0.06491	0.24178	0.156417	0.194757	0.186051	0.0279466	0.75387	0.564748	0.669715	0.682242	0.0629766
maxlfq_top0	Maxquant	0.641122	0.419857	0.530555	0.515173	0.0782878	0.320594	0.178845	0.237411	0.224863	0.0473856	0.690742	0.439049	0.549948	0.536848	0.0770161
maxlfq_top3	FragPipe	0.713522	0.571674	0.643192	0.635983	0.0485539	0.24036	0.156095	0.1934	0.184676	0.0281168	0.74854	0.538014	0.660141	0.659044	0.0652937
maxlfq_top3	Maxquant	0.710377	0.449701	0.572328	0.586794	0.0848165	0.319957	0.176649	0.236409	0.222269	0.0476499	0.741667	0.393601	0.562823	0.521303	0.105488
maxlfq_count	FragPipe	0.524543	0.307748	0.421009	0.439227	0.0743764	0.276453	0.132303	0.187415	0.172201	0.0452499	0.586429	0.279399	0.481542	0.53736	0.10999
maxlfq_count	Maxquant	0.490863	0.313703	0.416513	0.446102	0.0664011	0.186447	0.129177	0.159341	0.1564	0.0201061	0.567038	0.26463	0.435411	0.399235	0.101465
top0_top3	FragPipe	0.827266	0.675648	0.776181	0.801775	0.0496149	0.0112398	0.000892518	0.00402543	0.00215382	0.00373748	0.893877	0.787655	0.836996	0.839013	0.0359133
top0_top3	Maxquant	0.923958	0.67262	0.797381	0.797216	0.0685701	0.00588078	0.000308186	0.00293132	0.00237336	0.00191948	0.853353	0.621601	0.757172	0.767081	0.0666378
top0_count	FragPipe	0.617537	0.376324	0.46963	0.469128	0.0680111	0.195142	0.0504087	0.115525	0.113088	0.0417843	0.598621	0.291098	0.495805	0.537857	0.0950006
top0_count	Maxquant	0.578726	0.37906	0.474731	0.479886	0.0700668	0.2367	0.113844	0.162882	0.160762	0.0381928	0.640116	0.287035	0.458694	0.409623	0.117008
top3_count	FragPipe	0.519449	0.329042	0.425555	0.416148	0.068279	0.197254	0.0616485	0.118377	0.114074	0.0398314	0.575122	0.253906	0.445856	0.473619	0.101486
top3_count	Maxquant	0.535568	0.30548	0.41107	0.402021	0.0822451	0.236481	0.11372	0.163156	0.160515	0.038319	0.606768	0.198811	0.396735	0.353429	0.136249

## Sheet: DIA_statistics
Supp.Data1.Tab4 Complementarity metrics of DIA datasets
view_pair	platform	max_Pearson'R	min_Pearson'R	mean_Pearson'R	median_Pearson'R	sd_Pearson'R	max_missingrate	min_missingrate	mean_missingrate	median_missingrate	sd_missingrate	max_DEA_pearson'R	min_DEA_pearson'R	mean_DEA_pearson'R	median_DEA_pearson'R	sd_DEA_pearson'R
dlfq_maxlfq	DIANN	0.761302	0.625576	0.689291	0.676453	0.0522314	0.0997332	0.0326367	0.0579325	0.0475854	0.0247249	0.815665	0.500618	0.656464	0.692313	0.104368
dlfq_maxlfq	Spectronaut	0.914685	0.706443	0.803625	0.81125	0.0673861	0.00370813	8.22e-05	0.000854916	0.000458086	0.00127465	0.891438	0.499682	0.684161	0.669821	0.145072
dlfq_top3	DIANN	0.697498	0.473961	0.545907	0.517068	0.0759798	0.104902	0.0389974	0.0712346	0.069685	0.0239161	0.721009	0.317941	0.506686	0.511498	0.147079
dlfq_top3	Spectronaut	0.730951	0.478352	0.577528	0.547672	0.0872983	0.0446512	0.00194141	0.0102328	0.00519163	0.015233	0.675017	0.309801	0.532745	0.571411	0.153122
dlfq_top1	DIANN	0.690684	0.450435	0.521562	0.506728	0.0791169	0.17895	0.0680751	0.104447	0.0940129	0.0384649	0.611538	0.2325	0.398258	0.442508	0.138565
dlfq_top1	Spectronaut	0.718592	0.453673	0.536267	0.512897	0.0868542	0.132409	0.0150478	0.0404	0.0259654	0.0412567	0.621904	0.235789	0.447829	0.480811	0.147883
maxlfq_top3	DIANN	0.74124	0.526533	0.622567	0.626709	0.0754586	0.0484176	0.00516879	0.0133649	0.00645022	0.015659	0.683258	0.324606	0.500076	0.502071	0.122004
maxlfq_top3	Spectronaut	0.766501	0.576984	0.6469	0.648699	0.0686649	0.0439901	0.000813398	0.00937958	0.00473355	0.0153632	0.700914	0.494926	0.582267	0.547332	0.0864295
maxlfq_top1	DIANN	0.724312	0.48815	0.581087	0.559026	0.0757148	0.137987	0.0227544	0.0467162	0.034059	0.0405784	0.574678	0.246401	0.381409	0.354266	0.118778
maxlfq_top1	Spectronaut	0.743814	0.525319	0.588155	0.581511	0.0754515	0.131748	0.0113397	0.0395467	0.0258832	0.0414891	0.618413	0.34753	0.471458	0.456675	0.101051
top3_top1	DIANN	0.820257	0.649993	0.745104	0.747228	0.0622494	0.0895698	0.017358	0.0333513	0.0243279	0.0250603	0.791545	0.500233	0.615207	0.622017	0.091647
top3_top1	Spectronaut	0.833498	0.639094	0.741326	0.751094	0.0668524	0.0877578	0.0105263	0.0301672	0.0219572	0.0262288	0.801872	0.57491	0.661887	0.645673	0.0712563

## Sheet: DEP_lists
Supp.Data1.Tab5 The DEPs detected by limma from different views (dlfq/maxlfq/top3/top1) and the ground truth(DEPs). "1" means labeled as DEP, "0" means non-DEP.
proteins	dlfq	maxlfq	top3	top1	DEPs
sp|A0A0U1RQG5|CT47C_HUMAN	1	0	0	0	0
sp|A0A1B0GUS0|CS085_HUMAN	1	0	0	0	0
sp|A5Z2X5|YP010_YEAST	1	1	1	1	1
sp|A8MTB9|CEA18_HUMAN	1	0	0	0	0
sp|O13297|CET1_YEAST	1	1	1	1	1
sp|O13329|FOB1_YEAST	1	0	0	0	1
sp|O13535|YH11B_YEAST	1	1	1	1	1
sp|O13547|CCW14_YEAST	1	1	1	1	1
sp|O13563|RPN13_YEAST	1	0	0	0	1
sp|O13585|YP089_YEAST	1	0	1	1	1
sp|O14455|RL36B_YEAST	1	1	1	1	1
sp|O14467|MBF1_YEAST	1	1	1	1	1
sp|O14468|YO304_YEAST	1	1	0	0	1
sp|O14548|COX7R_HUMAN	1	1	1	1	0
sp|O60200|MDM35_YEAST	1	0	1	1	1
sp|O75414|NDK6_HUMAN	1	0	0	1	0
sp|O76039|CDKL5_HUMAN	1	1	1	1	0
sp|O95876|FRITZ_HUMAN	1	1	1	1	0
sp|P00044|CYC1_YEAST	1	1	1	1	1
sp|P00045|CYC7_YEAST	1	1	1	0	1
sp|P00127|QCR6_YEAST	1	1	1	1	1
sp|P00128|QCR7_YEAST	1	0	0	0	1
sp|P00175|CYB2_YEAST	1	0	1	1	1
sp|P00330|ADH1_YEAST	1	0	0	0	1
sp|P00331|ADH2_YEAST	1	1	1	0	1
sp|P00350|6PGD_ECOLI	1	1	1	1	1
sp|P00358|G3P2_YEAST	1	1	1	1	1
sp|P00359|G3P3_YEAST	1	0	0	0	1
sp|P00360|G3P1_YEAST	1	0	0	0	1
sp|P00363|FRDA_ECOLI	1	1	1	1	1
sp|P00370|DHE4_ECOLI	1	1	0	0	1
sp|P00427|COX6_YEAST	1	1	1	1	1
sp|P00431|CCPR_YEAST	1	0	0	1	1
sp|P00445|SODC_YEAST	1	1	1	1	1
sp|P00447|SODM_YEAST	1	1	1	1	1
sp|P00448|SODM_ECOLI	1	1	1	1	1
sp|P00452|RIR1_ECOLI	1	1	0	0	1
sp|P00490|PHSM_ECOLI	1	1	1	1	1
sp|P00498|HIS1_YEAST	1	0	1	0	1
sp|P00509|AAT_ECOLI	1	1	1	1	1
sp|P00546|CDK1_YEAST	1	1	1	1	1
sp|P00549|KPYK1_YEAST	1	0	1	1	1
sp|P00550|PTM3C_ECOLI	1	1	1	1	1
sp|P00560|PGK_YEAST	1	1	0	0	1
sp|P00579|RPOD_ECOLI	1	1	1	1	1
sp|P00582|DPO1_ECOLI	1	1	1	0	1
sp|P00722|BGAL_ECOLI	1	1	0	0	1
sp|P00724|INV2_YEAST	1	1	1	1	1
sp|P00729|CBPY_YEAST	1	1	1	1	1
sp|P00812|ARGI_YEAST	1	1	0	1	1
sp|P00815|HIS2_YEAST	1	1	1	1	1
sp|P00817|IPYR_YEAST	1	1	0	0	1
sp|P00830|ATPB_YEAST	1	0	0	1	1
sp|P00864|CAPP_ECOLI	1	1	1	1	1
sp|P00890|CISY1_YEAST	1	1	0	0	1
sp|P00899|TRPE_YEAST	1	1	1	1	1
sp|P00912|TRPF_YEAST	1	0	1	1	1
sp|P00924|ENO1_YEAST	1	1	0	0	1
sp|P00927|THDH_YEAST	1	1	1	1	1
sp|P00931|TRP_YEAST	1	1	1	1	1
sp|P00937|TRPG_YEAST	1	1	1	0	1
sp|P00942|TPIS_YEAST	1	1	0	1	1
sp|P00944|XYLA_ECOLI	1	1	0	0	1
sp|P00946|MANA_ECOLI	1	1	1	0	1
sp|P00950|PMG1_YEAST	1	1	0	1	1
sp|P00954|SYW_ECOLI	1	1	1	1	1
sp|P00956|SYI_ECOLI	1	1	1	1	1
sp|P00957|SYA_ECOLI	1	1	1	0	1
sp|P00958|SYMC_YEAST	1	1	1	1	1
sp|P00959|SYM_ECOLI	1	1	1	0	1
sp|P00960|SYGA_ECOLI	1	1	1	0	1
sp|P00961|SYGB_ECOLI	1	1	0	0	1
sp|P00962|SYQ_ECOLI	1	1	0	1	1
sp|P00963|ASNA_ECOLI	1	1	1	1	1
sp|P00968|CARB_ECOLI	1	1	0	0	1
sp|P01098|STF1_YEAST	1	1	1	1	1
sp|P01119|RAS1_YEAST	1	0	0	0	1
sp|P01120|RAS2_YEAST	1	1	1	1	1
sp|P01123|YPT1_YEAST	1	1	1	1	1
sp|P02358|RS6_ECOLI	1	1	1	0	1
sp|P02359|RS7_ECOLI	1	1	1	1	1
sp|P02400|RLA4_YEAST	1	0	0	0	1
sp|P02406|RL28_YEAST	1	1	1	1	1
sp|P02413|RL15_ECOLI	1	1	1	0	1
sp|P02557|TBB_YEAST	1	0	1	1	1
sp|P02829|HSP82_YEAST	1	1	1	1	1
sp|P02924|ARAF_ECOLI	1	1	1	0	1
sp|P02925|RBSB_ECOLI	1	1	1	1	1
sp|P02992|EFTU_YEAST	1	1	1	1	1
sp|P03817|MIOC_ECOLI	1	1	1	1	1
sp|P03841|MALM_ECOLI	1	1	1	0	1
sp|P03871|REP1_YEAST	1	0	1	0	1
sp|P03872|REP2_YEAST	1	1	1	1	1
sp|P03874|CBP2_YEAST	1	0	1	1	1
sp|P03965|CARB_YEAST	1	1	1	0	1
sp|P04036|DAPB_ECOLI	1	1	1	1	1
sp|P04037|COX4_YEAST	1	0	1	1	1
sp|P04046|PUR1_YEAST	1	1	0	0	1
sp|P04050|RPB1_YEAST	1	0	0	0	1
sp|P04076|ARLY_YEAST	1	1	1	1	1
sp|P04079|GUAA_ECOLI	1	1	1	0	1
sp|P04128|FIMA1_ECOLI	1	1	1	1	1
sp|P04147|PABP_YEAST	1	0	0	0	1
sp|P04161|PUR3_YEAST	1	0	0	1	1
sp|P04425|GSHB_ECOLI	1	1	1	1	1
sp|P04449|RL24A_YEAST	1	1	1	1	1
sp|P04456|RL25_YEAST	1	0	0	0	1
sp|P04693|TYRB_ECOLI	1	1	1	1	1
sp|P04786|TOP1_YEAST	1	0	1	1	1
sp|P04801|SYTC_YEAST	1	1	0	0	1
sp|P04802|SYDC_YEAST	1	1	0	0	1
sp|P04803|SYWM_YEAST	1	0	1	0	1
sp|P04805|SYE_ECOLI	1	1	1	0	1
sp|P04806|HXKA_YEAST	1	1	1	0	1
sp|P04807|HXKB_YEAST	1	1	1	1	1
sp|P04819|DNLI1_YEAST	1	1	0	0	1
sp|P04821|CDC25_YEAST	1	0	1	1	1
sp|P04825|AMPN_ECOLI	1	1	1	1	1
sp|P04840|VDAC1_YEAST	1	1	1	1	1
sp|P04949|FLIC_ECOLI	1	1	1	0	1
sp|P04951|KDSB_ECOLI	1	1	1	1	1
sp|P04982|RBSD_ECOLI	1	1	0	1	1
sp|P04983|RBSA_ECOLI	1	1	1	1	1
sp|P05020|PYRC_ECOLI	1	1	1	0	1
sp|P05030|PMA1_YEAST	1	1	1	1	1
sp|P05042|FUMC_ECOLI	1	1	1	1	1
sp|P05055|PNP_ECOLI	1	1	1	1	1
sp|P05066|PHR_YEAST	1	0	0	0	1
sp|P05114|HMGN1_HUMAN	1	0	1	1	0
sp|P05150|OTC_YEAST	1	0	0	0	1
sp|P05317|RLA0_YEAST	1	1	1	1	1
sp|P05319|RLA2_YEAST	1	0	0	0	1
sp|P05373|HEM2_YEAST	1	1	0	0	1
sp|P05374|CHO2_YEAST	1	1	1	1	1
sp|P05375|PLMT_YEAST	1	0	0	1	1
sp|P05453|ERF3_YEAST	1	0	0	0	1
sp|P05458|PTRA_ECOLI	1	1	0	0	1
sp|P05459|PDXB_ECOLI	1	1	0	1	1
sp|P05626|ATPF_YEAST	1	1	0	0	1
sp|P05694|METE_YEAST	1	1	1	1	1
sp|P05737|RL7A_YEAST	1	1	1	1	1
sp|P05738|RL9A_YEAST	1	1	1	1	1
sp|P05739|RL6B_YEAST	1	1	1	1	1
sp|P05740|RL17A_YEAST	1	1	1	1	1
sp|P05744|RL33A_YEAST	1	1	0	0	1
sp|P05748|RL15A_YEAST	1	1	1	1	1
sp|P05749|RL22A_YEAST	1	0	0	0	1
sp|P05750|RS3_YEAST	1	0	1	1	1
sp|P05756|RS13_YEAST	1	1	1	1	1
sp|P05759|RS31_YEAST	1	1	0	0	1
sp|P05793|ILVC_ECOLI	1	1	0	1	1
sp|P06100|NOT2_YEAST	1	0	1	1	1
sp|P06101|CDC37_YEAST	1	1	1	1	1
sp|P06102|NOT3_YEAST	1	1	1	1	1
sp|P06103|EIF3B_YEAST	1	0	0	0	1
sp|P06104|UBC2_YEAST	1	0	0	0	1
sp|P06105|SC160_YEAST	1	1	1	1	1
sp|P06115|CATT_YEAST	1	1	1	1	1
sp|P06168|ILV5_YEAST	1	1	1	1	1
sp|P06169|PDC1_YEAST	1	0	0	0	1
sp|P06174|HEM4_YEAST	1	1	1	1	1
sp|P06182|CCHL_YEAST	1	0	0	1	1
sp|P06197|PIS_YEAST	1	1	0	0	1
sp|P06208|LEU1_YEAST	1	1	1	1	1
sp|P06244|KAPA_YEAST	1	1	0	0	1
sp|P06245|KAPB_YEAST	1	0	1	0	1
sp|P06610|BTUE_ECOLI	1	1	1	1	1
sp|P06612|TOP1_ECOLI	1	1	1	0	1
sp|P06634|DED1_YEAST	1	1	1	1	1
sp|P06700|SIR2_YEAST	1	1	0	0	1
sp|P06701|SIR3_YEAST	1	0	0	1	1
sp|P06704|CDC31_YEAST	1	1	1	1	1
sp|P06715|GSHR_ECOLI	1	1	1	1	1
sp|P06720|AGAL_ECOLI	1	1	1	1	1
sp|P06721|METC_ECOLI	1	1	1	1	1
sp|P06738|PHSG_YEAST	1	1	1	1	1
sp|P06753|TPM3_HUMAN	1	0	1	1	0
sp|P06773|DCTD_YEAST	1	0	0	1	1
sp|P06774|HAP2_YEAST	1	1	0	1	1
sp|P06776|PDE2_YEAST	1	1	1	1	1
sp|P06778|RAD52_YEAST	1	1	1	1	1
sp|P06781|RHO2_YEAST	1	0	0	0	1
sp|P06782|SNF1_YEAST	1	1	0	0	1
sp|P06785|TYSY_YEAST	1	1	1	1	1
sp|P06786|TOP2_YEAST	1	1	1	0	1
sp|P06839|RAD3_YEAST	1	1	1	0	1
sp|P06843|SPT2_YEAST	1	0	0	1	1
sp|P06850|CRF_HUMAN	1	0	0	0	0
sp|P06959|ODP2_ECOLI	1	1	1	1	1
sp|P06968|DUT_ECOLI	1	1	1	1	1
sp|P06986|HIS8_ECOLI	1	1	1	1	1
sp|P06987|HIS7_ECOLI	1	1	1	0	1
sp|P06989|HIS2_ECOLI	1	1	1	1	1
sp|P07003|POXB_ECOLI	1	1	0	0	1
sp|P07004|PROA_ECOLI	1	1	1	1	1
sp|P07012|RF2_ECOLI	1	1	1	0	1
sp|P07014|SDHB_ECOLI	1	1	1	0	1
sp|P07024|USHA_ECOLI	1	1	1	1	1
sp|P07118|SYV_ECOLI	1	1	1	1	1
sp|P07143|CY1_YEAST	1	1	0	0	1
sp|P07149|FAS1_YEAST	1	1	1	0	1
sp|P07170|KAD2_YEAST	1	1	1	1	1
sp|P07172|HIS8_YEAST	1	1	1	1	1
sp|P07213|TOM70_YEAST	1	1	1	1	1
sp|P07236|SYTM_YEAST	1	1	0	0	1
sp|P07244|PUR2_YEAST	1	1	1	1	1
sp|P07245|C1TC_YEAST	1	0	1	1	1
sp|P07246|ADH3_YEAST	1	1	1	1	1
sp|P07248|ADR1_YEAST	1	1	0	0	1
sp|P07251|ATPA_YEAST	1	1	1	1	1
sp|P07253|CBP6_YEAST	1	0	0	0	1
sp|P07256|QCR1_YEAST	1	1	1	1	1
sp|P07257|QCR2_YEAST	1	1	1	0	1
sp|P07259|PYR1_YEAST	1	1	1	1	1
sp|P07260|IF4E_YEAST	1	1	1	1	1
sp|P07261|GCR1_YEAST	1	0	0	0	1
sp|P07262|DHE4_YEAST	1	1	1	1	1
sp|P07263|SYH_YEAST	1	1	1	1	1
sp|P07264|LEUC_YEAST	1	0	0	0	1
sp|P07267|CARP_YEAST	1	0	0	1	1
sp|P07269|PHO2_YEAST	1	1	1	1	1
sp|P07273|TFS2_YEAST	1	0	0	1	1
sp|P07274|PROF_YEAST	1	1	1	1	1
sp|P07275|PUT2_YEAST	1	1	0	0	1
sp|P07277|ERG12_YEAST	1	1	0	0	1
sp|P07278|KAPR_YEAST	1	1	1	1	1
sp|P07283|PMM_YEAST	1	1	1	1	1
sp|P07284|SYSC_YEAST	1	1	1	1	1
sp|P07285|TRPD_YEAST	1	1	0	0	1
sp|P07286|GPT_YEAST	1	0	0	0	1
sp|P07342|ILVB_YEAST	1	1	1	0	1
sp|P07347|ARD1_YEAST	1	1	1	1	1
sp|P07395|SYFB_ECOLI	1	1	1	0	1
sp|P07464|THGA_ECOLI	1	1	1	1	1
sp|P07650|TYPH_ECOLI	1	1	1	0	1
sp|P07702|LYS2_YEAST	1	1	1	0	1
sp|P07703|RPAC1_YEAST	1	1	0	0	1
sp|P07806|SYV_YEAST	1	1	1	1	1
sp|P07813|SYL_ECOLI	1	1	1	1	1
sp|P07913|TDH_ECOLI	1	1	1	1	1
sp|P07991|OAT_YEAST	1	1	1	1	1
sp|P08004|CHS1_YEAST	1	0	0	0	1
sp|P08018|PBS2_YEAST	1	1	1	1	1
sp|P08067|UCRI_YEAST	1	0	0	0	1
sp|P08178|PUR5_ECOLI	1	1	1	0	1
sp|P08179|PUR3_ECOLI	1	1	1	1	1
sp|P08192|FOLC_ECOLI	1	1	0	0	1
sp|P08194|GLPT_ECOLI	1	1	1	1	1
sp|P08200|IDH_ECOLI	1	1	1	1	1
sp|P08244|PYRF_ECOLI	1	1	0	0	1
sp|P08312|SYFA_ECOLI	1	1	1	1	1
sp|P08417|FUMH_YEAST	1	1	1	1	1
sp|P08425|SYFM_YEAST	1	1	1	0	1
sp|P08456|PSS_YEAST	1	0	1	1	1
sp|P08518|RPB2_YEAST	1	1	1	1	1
sp|P08524|ERG20_YEAST	1	1	0	0	1
sp|P08566|ARO1_YEAST	1	1	1	1	1
sp|P08678|CYAA_YEAST	1	1	0	0	1
sp|P08679|CISY2_YEAST	1	1	1	0	1
sp|P08839|PT1_ECOLI	1	1	1	1	1
sp|P08957|T1MK_ECOLI	1	1	1	1	1
sp|P08964|MYO1_YEAST	1	0	0	0	1
sp|P08997|MASY_ECOLI	1	1	1	0	1
sp|P09029|PURK_ECOLI	1	1	1	1	1
sp|P09030|EX3_ECOLI	1	1	0	0	1
sp|P09032|EI2BG_YEAST	1	1	0	0	1
sp|P09127|HEMX_ECOLI	1	0	0	0	1
sp|P09147|GALE_ECOLI	1	1	0	1	1
sp|P09158|SPEE_ECOLI	1	1	0	1	1
sp|P09323|PTW3C_ECOLI	1	1	1	1	1
sp|P09368|PUT1_YEAST	1	0	1	1	1
sp|P09372|GRPE_ECOLI	1	1	1	1	1
sp|P09373|PFLB_ECOLI	1	1	1	1	1
sp|P09394|GLPQ_ECOLI	1	1	1	1	1
sp|P09424|MTLD_ECOLI	1	1	0	1	1
sp|P09436|SYIC_YEAST	1	1	1	1	1
sp|P09440|C1TM_YEAST	1	1	0	1	1
sp|P09457|ATPO_YEAST	1	1	0	1	1
sp|P09496|CLCA_HUMAN	1	0	0	0	0
sp|P09546|PUTA_ECOLI	1	1	1	0	1
sp|P09547|SWI1_YEAST	1	0	0	1	1
sp|P09551|ARGT_ECOLI	1	1	1	1	1
sp|P09620|KEX1_YEAST	1	1	1	1	1
sp|P09624|DLDH_YEAST	1	1	0	0	1
sp|P09733|TBA1_YEAST	1	1	1	1	1
sp|P09734|TBA3_YEAST	1	1	1	1	1
sp|P09798|CDC16_YEAST	1	1	1	0	1
sp|P09831|GLTB_ECOLI	1	1	1	0	1
sp|P09832|GLTD_ECOLI	1	1	1	1	1
sp|P09880|TRNL_YEAST	1	1	1	1	1
sp|P09938|RIR2_YEAST	1	1	1	1	1
sp|P09950|HEM1_YEAST	1	1	1	1	1
sp|P09959|SWI6_YEAST	1	0	0	0	1
sp|P0A698|UVRA_ECOLI	1	1	1	1	1
sp|P0A6A3|ACKA_ECOLI	1	1	1	0	1
sp|P0A6A8|ACP_ECOLI	1	1	1	1	1
sp|P0A6B7|ISCS_ECOLI	1	1	1	1	1
sp|P0A6E4|ASSY_ECOLI	1	1	1	0	1
sp|P0A6E6|ATPE_ECOLI	1	1	1	1	1
sp|P0A6F1|CARA_ECOLI	1	1	1	1	1
sp|P0A6F3|GLPK_ECOLI	1	1	1	1	1
sp|P0A6F5|CH60_ECOLI	1	1	1	1	1
sp|P0A6F9|CH10_ECOLI	1	1	1	1	1
sp|P0A6G7|CLPP_ECOLI	1	1	1	1	1
sp|P0A6H5|HSLU_ECOLI	1	1	1	1	1
sp|P0A6I0|KCY_ECOLI	1	1	1	0	1
sp|P0A6I3|COAA_ECOLI	1	1	1	1	1
sp|P0A6J5|DADA_ECOLI	1	0	0	0	1
sp|P0A6J8|DDLA_ECOLI	1	1	1	1	1
sp|P0A6K1|DAPF_ECOLI	1	1	1	1	1
sp|P0A6K6|DEOB_ECOLI	1	1	1	1	1
sp|P0A6L0|DEOC_ECOLI	1	1	0	1	1
sp|P0A6L2|DAPA_ECOLI	1	1	1	1	1
sp|P0A6L4|NANA_ECOLI	1	1	1	1	1
sp|P0A6L9|HSCB_ECOLI	1	0	0	0	1
sp|P0A6M8|EFG_ECOLI	1	1	1	1	1
sp|P0A6N4|EFP_ECOLI	1	1	1	1	1
sp|P0A6N8|EFPL_ECOLI	1	1	1	0	1
sp|P0A6P1|EFTS_ECOLI	1	1	1	1	1
sp|P0A6P5|DER_ECOLI	1	1	1	0	1
sp|P0A6P7|ENGB_ECOLI	1	1	1	1	1
sp|P0A6P9|ENO_ECOLI	1	1	1	1	1
sp|P0A6Q3|FABA_ECOLI	1	1	1	1	1
sp|P0A6R0|FABH_ECOLI	1	1	1	1	1
sp|P0A6S7|GPDA_ECOLI	1	1	1	1	1
sp|P0A6T1|G6PI_ECOLI	1	1	1	0	1
sp|P0A6T3|GAL1_ECOLI	1	1	1	0	1
sp|P0A6T5|GCH1_ECOLI	1	1	0	1	1
sp|P0A6V1|GLGC_ECOLI	1	1	1	0	1
sp|P0A6V8|GLK_ECOLI	1	1	0	0	1
sp|P0A6W5|GREA_ECOLI	1	1	1	1	1
sp|P0A6W9|GSH1_ECOLI	1	1	0	0	1
sp|P0A6X7|IHFA_ECOLI	1	1	1	1	1
sp|P0A6Y1|IHFB_ECOLI	1	1	1	1	1
sp|P0A6Y8|DNAK_ECOLI	1	1	0	0	1
sp|P0A6Z1|HSCA_ECOLI	1	1	1	1	1
sp|P0A6Z3|HTPG_ECOLI	1	1	1	1	1
sp|P0A705|IF2_ECOLI	1	1	1	1	1
sp|P0A707|IF3_ECOLI	1	1	1	1	1
sp|P0A715|KDSA_ECOLI	1	1	1	1	1
sp|P0A717|KPRS_ECOLI	1	1	1	1	1
sp|P0A734|MINE_ECOLI	1	1	1	0	1
sp|P0A744|MSRA_ECOLI	1	1	1	1	1
sp|P0A746|MSRB_ECOLI	1	1	1	1	1
sp|P0A749|MURA_ECOLI	1	1	1	0	1
sp|P0A759|NAGB_ECOLI	1	1	0	0	1
sp|P0A761|NANE_ECOLI	1	1	1	1	1
sp|P0A763|NDK_ECOLI	1	1	1	1	1
sp|P0A786|PYRB_ECOLI	1	1	1	1	1
sp|P0A794|PDXJ_ECOLI	1	1	1	1	1
sp|P0A796|PFKA_ECOLI	1	1	1	1	1
sp|P0A799|PGK_ECOLI	1	1	1	1	1
sp|P0A7A9|IPYR_ECOLI	1	1	1	0	1
sp|P0A7B1|PPK1_ECOLI	1	1	0	0	1
sp|P0A7C6|PEPE_ECOLI	1	1	1	1	1
sp|P0A7D1|PTH_ECOLI	1	1	1	1	1
sp|P0A7D4|PURA_ECOLI	1	1	1	1	1
sp|P0A7D7|PUR7_ECOLI	1	1	1	1	1
sp|P0A7E5|PYRG_ECOLI	1	1	0	0	1
sp|P0A7E9|PYRH_ECOLI	1	1	0	0	1
sp|P0A7F3|PYRI_ECOLI	1	1	1	0	1
sp|P0A7F6|SPED_ECOLI	1	1	1	1	1
sp|P0A7G2|RBFA_ECOLI	1	1	1	1	1
sp|P0A7G6|RECA_ECOLI	1	0	1	0	1
sp|P0A7I0|RF1_ECOLI	1	1	1	1	1
sp|P0A7I4|RF3_ECOLI	1	1	1	1	1
sp|P0A7J3|RL10_ECOLI	1	1	1	1	1
sp|P0A7J7|RL11_ECOLI	1	1	1	1	1
sp|P0A7K2|RL7_ECOLI	1	1	1	1	1
sp|P0A7K6|RL19_ECOLI	1	1	1	1	1
sp|P0A7L0|RL1_ECOLI	1	1	1	1	1
sp|P0A7L8|RL27_ECOLI	1	1	1	0	1
sp|P0A7M2|RL28_ECOLI	1	1	1	0	1
sp|P0A7M6|RL29_ECOLI	1	1	1	1	1
sp|P0A7M9|RL31_ECOLI	1	1	1	1	1
sp|P0A7N9|RL33_ECOLI	1	1	1	1	1
sp|P0A7R1|RL9_ECOLI	1	1	1	1	1
sp|P0A7R5|RS10_ECOLI	1	1	1	1	1
sp|P0A7R9|RS11_ECOLI	1	1	1	1	1
sp|P0A7S3|RS12_ECOLI	1	1	1	1	1
sp|P0A7S9|RS13_ECOLI	1	1	1	1	1
sp|P0A7T3|RS16_ECOLI	1	1	1	1	1
sp|P0A7T7|RS18_ECOLI	1	1	1	1	1
sp|P0A7U3|RS19_ECOLI	1	1	1	1	1
sp|P0A7V0|RS2_ECOLI	1	1	1	1	1
sp|P0A7V3|RS3_ECOLI	1	1	1	0	1
sp|P0A7V8|RS4_ECOLI	1	1	1	1	1
sp|P0A7W1|RS5_ECOLI	1	1	1	1	1
sp|P0A7W7|RS8_ECOLI	1	1	1	1	1
sp|P0A7X3|RS9_ECOLI	1	1	1	1	1
sp|P0A7X6|RIMM_ECOLI	1	1	0	1	1
sp|P0A7Y0|RNC_ECOLI	1	1	1	1	1
sp|P0A7Z0|RPIA_ECOLI	1	1	1	1	1
sp|P0A7Z4|RPOA_ECOLI	1	1	1	1	1
sp|P0A800|RPOZ_ECOLI	1	1	1	1	1
sp|P0A805|RRF_ECOLI	1	1	1	1	1
sp|P0A817|METK_ECOLI	1	1	1	0	1
sp|P0A825|GLYA_ECOLI	1	1	1	1	1
sp|P0A836|SUCC_ECOLI	1	1	1	1	1
sp|P0A840|SURE_ECOLI	1	1	0	0	1
sp|P0A847|TGT_ECOLI	1	1	1	0	1
sp|P0A850|TIG_ECOLI	1	1	1	1	1
sp|P0A853|TNAA_ECOLI	1	1	1	1	1
sp|P0A855|TOLB_ECOLI	1	1	1	0	1
sp|P0A858|TPIS_ECOLI	1	1	1	1	1
sp|P0A862|TPX_ECOLI	1	1	1	1	1
sp|P0A867|TALA_ECOLI	1	1	1	0	1
sp|P0A870|TALB_ECOLI	1	1	1	1	1
sp|P0A877|TRPA_ECOLI	1	1	0	1	1
sp|P0A879|TRPB_ECOLI	1	1	1	0	1
sp|P0A884|TYSY_ECOLI	1	1	0	0	1
sp|P0A8A0|YEBC_ECOLI	1	1	0	0	1
sp|P0A8A2|YEEN_ECOLI	1	1	0	0	1
sp|P0A8B5|YBAB_ECOLI	1	1	1	1	1
sp|P0A8C4|YGFB_ECOLI	1	1	1	1	1
sp|P0A8D0|NRDR_ECOLI	1	1	1	0	1
sp|P0A8E1|YCFP_ECOLI	1	1	1	1	1
sp|P0A8E5|YACL_ECOLI	1	1	1	1	1
sp|P0A8E7|YAJQ_ECOLI	1	1	1	1	1
sp|P0A8F0|UPP_ECOLI	1	1	1	1	1
sp|P0A8G3|UXAC_ECOLI	1	1	1	1	1
sp|P0A8G6|NQOR_ECOLI	1	1	1	1	1
sp|P0A8H6|YIHI_ECOLI	1	1	1	1	1
sp|P0A8I3|YAAA_ECOLI	1	0	0	1	1
sp|P0A8I5|TRMB_ECOLI	1	1	1	1	1
sp|P0A8J4|YBED_ECOLI	1	1	1	1	1
sp|P0A8J8|RHLB_ECOLI	1	1	1	0	1
sp|P0A8K5|YAEP_ECOLI	1	1	1	0	1
sp|P0A8L1|SYS_ECOLI	1	1	1	1	1
sp|P0A8M0|SYN_ECOLI	1	1	1	1	1
sp|P0A8M3|SYT_ECOLI	1	1	0	1	1
sp|P0A8M6|YEEX_ECOLI	1	1	1	1	1
sp|P0A8N3|SYK1_ECOLI	1	1	1	1	1
sp|P0A8N5|SYK2_ECOLI	1	1	1	0	1
sp|P0A8P3|FETP_ECOLI	1	1	1	0	1
sp|P0A8S1|ARGP_ECOLI	1	1	1	1	1
sp|P0A8T7|RPOC_ECOLI	1	1	1	1	1
sp|P0A8U6|METJ_ECOLI	1	0	1	1	1
sp|P0A8V2|RPOB_ECOLI	1	1	1	1	1
sp|P0A8W2|SLYA_ECOLI	1	1	0	1	1
sp|P0A8W8|YFBU_ECOLI	1	1	1	0	1
sp|P0A8X0|YJGA_ECOLI	1	1	1	1	1
sp|P0A8X2|YCEI_ECOLI	1	1	0	1	1
sp|P0A8Y3|YIHX_ECOLI	1	1	0	0	1
sp|P0A8Y5|YIDA_ECOLI	1	0	1	0	1
sp|P0A910|OMPA_ECOLI	1	1	1	1	1
sp|P0A951|ATDA_ECOLI	1	0	0	0	1
sp|P0A953|FABB_ECOLI	1	1	1	1	1
sp|P0A955|ALKH_ECOLI	1	1	1	1	1
sp|P0A962|ASPG1_ECOLI	1	1	1	1	1
sp|P0A972|CSPE_ECOLI	1	0	1	1	1
sp|P0A988|DPO3B_ECOLI	1	1	1	0	1
sp|P0A991|ALF1_ECOLI	1	1	1	0	1
sp|P0A993|F16PA_ECOLI	1	1	1	1	1
sp|P0A9A6|FTSZ_ECOLI	1	1	1	0	1
sp|P0A9A9|FUR_ECOLI	1	1	1	1	1
sp|P0A9B2|G3P1_ECOLI	1	1	1	1	1
sp|P0A9C0|GLPA_ECOLI	1	0	0	0	1
sp|P0A9C3|GALM_ECOLI	1	1	0	0	1
sp|P0A9C5|GLN1B_ECOLI	1	1	1	0	1
sp|P0A9D2|GSTA_ECOLI	1	1	1	0	1
sp|P0A9D4|CYSE_ECOLI	1	1	1	1	1
sp|P0A9D8|DAPD_ECOLI	1	1	1	1	1
sp|P0A9F3|CYSB_ECOLI	1	1	0	0	1
sp|P0A9G6|ACEA_ECOLI	1	1	1	1	1
sp|P0A9J0|RNG_ECOLI	1	1	1	0	1
sp|P0A9J6|RBSK_ECOLI	1	1	1	1	1
sp|P0A9J8|CMPDT_ECOLI	1	1	1	0	1
sp|P0A9K3|PHOL_ECOLI	1	1	1	1	1
sp|P0A9K9|SLYD_ECOLI	1	1	1	1	1
sp|P0A9L3|FKBB_ECOLI	1	1	1	0	1
sp|P0A9L5|PPIC_ECOLI	1	1	1	1	1
sp|P0A9L8|P5CR_ECOLI	1	1	1	1	1
sp|P0A9M0|LON_ECOLI	1	1	1	0	1
sp|P0A9M2|HPRT_ECOLI	1	1	1	1	1
sp|P0A9M5|XGPT_ECOLI	1	1	1	1	1
sp|P0A9M8|PTA_ECOLI	1	1	1	1	1
sp|P0A9N4|PFLA_ECOLI	1	1	1	0	1
sp|P0A9P0|DLDH_ECOLI	1	1	1	1	1
sp|P0A9P4|TRXB_ECOLI	1	1	1	1	1
sp|P0A9Q1|ARCA_ECOLI	1	1	1	0	1
sp|P0A9Q5|ACCD_ECOLI	1	1	1	1	1
sp|P0A9Q7|ADHE_ECOLI	1	1	1	0	1
sp|P0A9Q9|DHAS_ECOLI	1	1	1	1	1
sp|P0A9R4|FER_ECOLI	1	1	1	1	1
sp|P0A9S1|FUCO_ECOLI	1	1	0	0	1
sp|P0A9T0|SERA_ECOLI	1	1	1	1	1
sp|P0A9T4|TAS_ECOLI	1	1	1	0	1
sp|P0A9W3|ETTA_ECOLI	1	1	0	0	1
sp|P0A9Y6|CSPC_ECOLI	1	1	1	1	1
sp|P0A9Z1|GLNB_ECOLI	1	1	1	1	1
sp|P0AA04|PTHP_ECOLI	1	1	1	1	1
sp|P0AA10|RL13_ECOLI	1	1	1	1	1
sp|P0AA16|OMPR_ECOLI	1	1	0	1	1
sp|P0AA25|THIO_ECOLI	1	1	1	1	1
sp|P0AA39|RLUC_ECOLI	1	1	0	0	1
sp|P0AAB4|UBID_ECOLI	1	1	1	1	1
sp|P0AAB6|GALF_ECOLI	1	1	1	0	1
sp|P0AAB8|USPD_ECOLI	1	1	1	0	1
sp|P0AAC0|USPE_ECOLI	1	1	0	0	1
sp|P0AAI3|FTSH_ECOLI	1	1	1	1	1
sp|P0AAI5|FABF_ECOLI	1	1	1	0	1
sp|P0AAI9|FABD_ECOLI	1	1	1	0	1
sp|P0AAN5|YAIA_ECOLI	1	1	1	0	1
sp|P0AAP3|FRMR_ECOLI	1	1	1	1	1
sp|P0AAQ2|YAJD_ECOLI	1	1	1	0	1
sp|P0AAT9|YBEL_ECOLI	1	1	1	0	1
sp|P0AAV6|YBGS_ECOLI	1	1	1	1	1
sp|P0AAX8|YBIS_ECOLI	1	1	1	1	1
sp|P0AB24|EFEO_ECOLI	1	1	0	0	1
sp|P0AB28|YCED_ECOLI	1	1	1	1	1
sp|P0AB52|YCHN_ECOLI	1	1	1	0	1
sp|P0AB55|YCII_ECOLI	1	1	1	1	1
sp|P0AB61|YCIN_ECOLI	1	1	1	1	1
sp|P0AB71|ALF_ECOLI	1	1	1	1	1
sp|P0AB77|KBL_ECOLI	1	1	0	0	1
sp|P0AB80|ILVE_ECOLI	1	1	0	0	1
sp|P0AB89|PUR8_ECOLI	1	1	1	0	1
sp|P0AB91|AROG_ECOLI	1	1	0	0	1
sp|P0ABA4|ATPD_ECOLI	1	1	1	0	1
sp|P0ABA6|ATPG_ECOLI	1	1	1	1	1
sp|P0ABB0|ATPA_ECOLI	1	1	1	1	1
sp|P0ABB4|ATPB_ECOLI	1	1	1	1	1
sp|P0ABD5|ACCA_ECOLI	1	1	1	1	1
sp|P0ABD8|BCCP_ECOLI	1	1	1	1	1
sp|P0ABE2|BOLA_ECOLI	1	1	1	1	1
sp|P0ABF1|PCNB_ECOLI	1	1	1	1	1
sp|P0ABF6|CDD_ECOLI	1	1	1	0	1
sp|P0ABH7|CISY_ECOLI	1	1	1	1	1
sp|P0ABH9|CLPA_ECOLI	1	1	1	0	1
sp|P0ABK5|CYSK_ECOLI	1	1	1	0	1
sp|P0ABP8|DEOD_ECOLI	1	1	1	1	1
sp|P0ABQ0|COABC_ECOLI	1	0	0	0	1
sp|P0ABQ2|GARR_ECOLI	1	1	1	1	1
sp|P0ABQ4|DYR_ECOLI	1	1	1	1	1
sp|P0ABS1|DKSA_ECOLI	1	1	1	1	1
sp|P0ABT2|DPS_ECOLI	1	1	1	1	1
sp|P0ABU0|MENB_ECOLI	1	1	1	1	1
sp|P0ABU2|YCHF_ECOLI	1	1	1	1	1
sp|P0ABU5|ELBB_ECOLI	1	1	1	1	1
sp|P0ABZ6|SURA_ECOLI	1	1	1	1	1
sp|P0AC13|DHPS_ECOLI	1	1	0	0	1
sp|P0AC19|FOLX_ECOLI	1	1	1	0	1
sp|P0AC33|FUMA_ECOLI	1	1	1	1	1
sp|P0AC38|ASPA_ECOLI	1	1	1	1	1
sp|P0AC41|SDHA_ECOLI	1	1	1	1	1
sp|P0AC47|FRDB_ECOLI	1	0	0	0	1
sp|P0AC53|G6PD_ECOLI	1	1	1	0	1
sp|P0AC59|GLRX2_ECOLI	1	1	1	0	1
sp|P0AC62|GLRX3_ECOLI	1	1	1	1	1
sp|P0AC69|GLRX4_ECOLI	1	1	1	1	1
sp|P0AC84|GLO2_ECOLI	1	1	1	1	1
sp|P0AC86|PHSG_ECOLI	1	0	0	0	1
sp|P0ACA1|YIBF_ECOLI	1	1	1	1	1
sp|P0ACA3|SSPA_ECOLI	1	1	0	1	1
sp|P0ACA7|GSTB_ECOLI	1	1	1	0	1
sp|P0ACB2|HEM2_ECOLI	1	1	0	0	1
sp|P0ACC7|GLMU_ECOLI	1	1	1	1	1
sp|P0ACD4|ISCU_ECOLI	1	1	1	0	1
sp|P0ACE7|HINT_ECOLI	1	1	1	1	1
sp|P0ACF0|DBHA_ECOLI	1	1	1	1	1
sp|P0ACF4|DBHB_ECOLI	1	1	1	1	1
sp|P0ACF8|HNS_ECOLI	1	1	1	1	1
sp|P0ACI0|ROB_ECOLI	1	1	1	1	1
sp|P0ACI6|ASNC_ECOLI	1	1	1	1	1
sp|P0ACJ0|LRP_ECOLI	1	1	1	1	1
sp|P0ACJ8|CRP_ECOLI	1	1	1	1	1
sp|P0ACP5|GNTR_ECOLI	1	0	0	0	1
sp|P0ACQ4|OXYR_ECOLI	1	1	1	1	1
sp|P0ACU7|YJDC_ECOLI	1	0	0	0	1
sp|P0ACV6|MPAA_ECOLI	1	1	0	0	1
sp|P0ACX3|YDHR_ECOLI	1	1	1	1	1
sp|P0ACY1|YDJA_ECOLI	1	1	1	1	1
sp|P0ACY3|YEAG_ECOLI	1	1	0	1	1
sp|P0AD05|YECA_ECOLI	1	1	1	1	1
sp|P0AD12|YEEZ_ECOLI	1	0	0	0	1
sp|P0AD49|YFIA_ECOLI	1	1	1	1	1
sp|P0AD61|KPYK1_ECOLI	1	1	1	1	1
sp|P0AD96|LIVJ_ECOLI	1	1	0	0	1
sp|P0ADB7|ECNB_ECOLI	1	1	1	1	1
sp|P0ADE8|YGFZ_ECOLI	1	1	1	1	1
sp|P0ADG4|SUHB_ECOLI	1	1	1	1	1
sp|P0ADG7|IMDH_ECOLI	1	1	1	1	1
sp|P0ADN2|YIFE_ECOLI	1	1	1	1	1
sp|P0ADP0|YIGB_ECOLI	1	1	1	0	1
sp|P0ADP9|YIHD_ECOLI	1	1	1	0	1
sp|P0ADQ2|FABY_ECOLI	1	1	1	0	1
sp|P0ADS2|ZAPA_ECOLI	1	1	1	1	1
sp|P0ADS6|YGGE_ECOLI	1	1	1	1	1
sp|P0ADT5|YGIC_ECOLI	1	1	1	1	1
sp|P0ADU5|YGIW_ECOLI	1	1	1	0	1
sp|P0ADV7|MLAC_ECOLI	1	1	1	0	1
sp|P0ADX7|YHHA_ECOLI	1	1	1	1	1
sp|P0ADY3|RL14_ECOLI	1	1	1	1	1
sp|P0ADY7|RL16_ECOLI	1	1	1	1	1
sp|P0ADZ4|RS15_ECOLI	1	1	1	1	1
sp|P0AE08|AHPC_ECOLI	1	1	1	1	1
sp|P0AE12|AMN_ECOLI	1	1	1	0	1
sp|P0AE18|MAP1_ECOLI	1	1	1	0	1
sp|P0AE22|APHA_ECOLI	1	1	1	0	1
sp|P0AE37|ASTA_ECOLI	1	1	1	1	1
sp|P0AE52|BCP_ECOLI	1	1	1	1	1
sp|P0AE63|CHAB_ECOLI	1	1	1	1	1
sp|P0AE88|CPXR_ECOLI	1	1	1	0	1
sp|P0AED0|USPA_ECOLI	1	1	1	1	1
sp|P0AED7|DAPE_ECOLI	1	1	1	1	1
sp|P0AEE5|MGLB_ECOLI	1	1	1	1	1
sp|P0AEG4|DSBA_ECOLI	1	1	1	0	1
sp|P0AEH5|ELAB_ECOLI	1	1	0	1	1
sp|P0AEK2|FABG_ECOLI	1	1	1	1	1
sp|P0AEK4|FABI_ECOLI	1	1	1	0	1
sp|P0AEM0|FKBX_ECOLI	1	1	1	1	1
sp|P0AEM4|FLGM_ECOLI	1	1	1	1	1
sp|P0AEM9|TCYJ_ECOLI	1	1	1	1	1
sp|P0AEN1|FRE_ECOLI	1	1	1	1	1
sp|P0AEP3|GALU_ECOLI	1	1	0	0	1
sp|P0AEQ1|GLCG_ECOLI	1	1	1	1	1
sp|P0AEQ3|GLNH_ECOLI	1	1	1	1	1
sp|P0AES0|GSP_ECOLI	1	1	1	0	1
sp|P0AES4|GYRA_ECOLI	1	1	1	1	1
sp|P0AES6|GYRB_ECOLI	1	1	1	1	1
sp|P0AES9|HDEA_ECOLI	1	1	1	0	1
sp|P0AET2|HDEB_ECOLI	1	1	1	0	1
sp|P0AET8|HDHA_ECOLI	1	1	1	1	1
sp|P0AEU0|HISJ_ECOLI	1	1	1	1	1
sp|P0AEU7|SKP_ECOLI	1	1	1	1	1
sp|P0AEW6|INGK_ECOLI	1	1	1	1	1
sp|P0AEW9|K1PF_ECOLI	1	1	1	1	1
sp|P0AEX5|KPPR_ECOLI	1	1	1	1	1
sp|P0AEX9|MALE_ECOLI	1	1	1	1	1
sp|P0AEZ3|MIND_ECOLI	1	1	0	0	1
sp|P0AEZ9|MOAB_ECOLI	1	1	0	1	1
sp|P0AF03|MOG_ECOLI	1	1	1	0	1
sp|P0AF08|APBC_ECOLI	1	1	0	0	1
sp|P0AF12|MTNN_ECOLI	1	1	1	1	1
sp|P0AF18|NAGA_ECOLI	1	1	1	0	1
sp|P0AF20|NAGC_ECOLI	1	1	1	0	1
sp|P0AF28|NARL_ECOLI	1	0	0	0	1
sp|P0AF36|ZAPB_ECOLI	1	1	1	1	1
sp|P0AF50|YJBR_ECOLI	1	1	1	1	1
sp|P0AF90|RRAB_ECOLI	1	1	1	1	1
sp|P0AF93|RIDA_ECOLI	1	1	1	1	1
sp|P0AF96|TABA_ECOLI	1	1	1	0	1
sp|P0AFC7|NUOB_ECOLI	1	1	1	1	1
sp|P0AFD1|NUOE_ECOLI	1	1	1	1	1
sp|P0AFF6|NUSA_ECOLI	1	1	1	1	1
sp|P0AFG0|NUSG_ECOLI	1	1	1	0	1
sp|P0AFG3|ODO1_ECOLI	1	1	1	0	1
sp|P0AFG6|ODO2_ECOLI	1	1	1	1	1
sp|P0AFG8|ODP1_ECOLI	1	1	1	0	1
sp|P0AFH8|OSMY_ECOLI	1	1	1	1	1
sp|P0AFI2|PARC_ECOLI	1	1	0	1	1
sp|P0AFI7|PDXH_ECOLI	1	1	1	1	1
sp|P0AFJ1|YJDM_ECOLI	1	1	1	1	1
sp|P0AFK0|PMBA_ECOLI	1	1	0	0	1
sp|P0AFK9|POTD_ECOLI	1	1	1	1	1
sp|P0AFL3|PPIA_ECOLI	1	1	1	0	1
sp|P0AFM4|PSIF_ECOLI	1	1	1	1	1
sp|P0AFP6|GCH1L_ECOLI	1	1	1	0	1
sp|P0AFU8|RISA_ECOLI	1	1	0	0	1
sp|P0AFW4|RNK_ECOLI	1	1	1	1	1
sp|P0AFX4|RSD_ECOLI	1	1	1	0	1
sp|P0AG07|RPE_ECOLI	1	1	1	1	1
sp|P0AG16|PUR1_ECOLI	1	1	1	1	1
sp|P0AG30|RHO_ECOLI	1	1	1	1	1
sp|P0AG44|RL17_ECOLI	1	1	1	1	1
sp|P0AG48|RL21_ECOLI	1	1	1	1	1
sp|P0AG55|RL6_ECOLI	1	1	1	1	1
sp|P0AG59|RS14_ECOLI	1	1	1	1	1
sp|P0AG63|RS17_ECOLI	1	1	1	1	1
sp|P0AG67|RS1_ECOLI	1	1	1	1	1
sp|P0AG80|UGPB_ECOLI	1	1	1	1	1
sp|P0AG82|PSTS_ECOLI	1	1	1	0	1
sp|P0AG84|YGHA_ECOLI	1	0	0	0	1
sp|P0AG86|SECB_ECOLI	1	1	1	1	1
sp|P0AGB0|SERB_ECOLI	1	0	0	0	1
sp|P0AGD1|SODC_ECOLI	1	1	1	1	1
sp|P0AGD3|SODF_ECOLI	1	1	1	1	1
sp|P0AGE0|SSB_ECOLI	1	1	1	1	1
sp|P0AGE6|CHRR_ECOLI	1	1	1	0	1
sp|P0AGE9|SUCD_ECOLI	1	1	1	1	1
sp|P0AGG0|THIL_ECOLI	1	0	0	0	1
sp|P0AGJ5|YFIF_ECOLI	1	1	0	0	1
sp|P0AGJ9|SYY_ECOLI	1	1	1	1	1
sp|P0AGK4|YHBY_ECOLI	1	1	1	1	1
sp|P0C018|RL18_ECOLI	1	1	1	1	1
sp|P0C0L2|OSMC_ECOLI	1	1	1	1	1
sp|P0C0L9|ISCX_ECOLI	1	1	1	0	1
sp|P0C0V0|DEGP_ECOLI	1	1	1	1	1
sp|P0C2H6|RL27A_YEAST	1	1	1	0	1
sp|P0C2H8|RL31A_YEAST	1	1	1	1	1
sp|P0C2H9|RL31B_YEAST	1	1	0	0	1
sp|P0C5N3|YG41A_YEAST	1	0	0	0	1
sp|P0C8J6|GATY_ECOLI	1	1	1	1	1
sp|P0C8J8|GATZ_ECOLI	1	1	1	1	1
sp|P0CS90|HSP77_YEAST	1	1	1	1	1
sp|P0CT04|IPB2_YEAST	1	1	1	1	1
sp|P0CX41|RL23A_YEAST	1	1	1	1	1
sp|P0CX49|RL18A_YEAST	1	1	1	1	1
sp|P0CX84|RL35A_YEAST	1	0	0	1	1
sp|P0DP89|ILVGP_ECOLI	1	1	1	1	1
sp|P0DTT0|BIPA_ECOLI	1	1	1	1	1
sp|P10081|IF4A_YEAST	1	0	0	1	1
sp|P10100|RLPA_ECOLI	1	1	0	0	1
sp|P10121|FTSY_ECOLI	1	1	1	1	1
sp|P10363|PRI1_YEAST	1	1	1	1	1
sp|P10408|SECA_ECOLI	1	1	0	0	1
sp|P10591|HSP71_YEAST	1	0	0	1	1
sp|P10614|CP51_YEAST	1	1	1	1	1
sp|P10622|RLA3_YEAST	1	0	0	0	1
sp|P10659|METK1_YEAST	1	1	1	1	1
sp|P10662|RT01_YEAST	1	1	0	0	1
sp|P10664|RL4A_YEAST	1	1	1	1	1
sp|P10823|GPA2_YEAST	1	1	1	0	1
sp|P10869|AK_YEAST	1	1	1	1	1
sp|P10961|HSF_YEAST	1	1	0	0	1
sp|P10962|MAK16_YEAST	1	1	1	1	1
sp|P10963|PCKA_YEAST	1	0	1	0	1
sp|P10964|RPA1_YEAST	1	0	0	1	1
sp|P11075|SEC7_YEAST	1	0	0	1	1
sp|P11154|PYC1_YEAST	1	1	0	0	1
sp|P11325|SYLM_YEAST	1	0	0	0	1
sp|P11353|HEM6_YEAST	1	1	0	1	1
sp|P11412|G6PD_YEAST	1	1	1	1	1
sp|P11491|PPB_YEAST	1	1	0	0	1
sp|P11632|NHP6A_YEAST	1	1	1	1	1
sp|P11633|NHP6B_YEAST	1	0	0	0	1
sp|P11655|SEC12_YEAST	1	0	0	1	1
sp|P11709|BIK1_YEAST	1	1	1	0	1
sp|P11745|RNA1_YEAST	1	1	1	1	1
sp|P11792|SCH9_YEAST	1	1	1	1	1
sp|P11875|SYR_ECOLI	1	1	0	0	1
sp|P11880|MURF_ECOLI	1	1	0	0	1
sp|P11914|MPPA_YEAST	1	0	0	1	1
sp|P11938|RAP1_YEAST	1	1	0	0	1
sp|P11978|SIR4_YEAST	1	0	1	0	1
sp|P12008|AROC_ECOLI	1	1	1	0	1
sp|P12383|PDR1_YEAST	1	1	1	1	1
sp|P12385|ERF1_YEAST	1	1	0	0	1
sp|P12611|WHI2_YEAST	1	1	1	1	1
sp|P12612|TCPA_YEAST	1	1	0	0	1
sp|P12630|BAR1_YEAST	1	1	1	1	1
sp|P12683|HMDH1_YEAST	1	1	1	0	1
sp|P12684|HMDH2_YEAST	1	0	1	1	1
sp|P12688|YPK1_YEAST	1	1	1	1	1
sp|P12695|ODP2_YEAST	1	1	0	0	1
sp|P12709|G6PI_YEAST	1	1	1	1	1
sp|P12753|RAD50_YEAST	1	0	0	0	1
sp|P12754|EI2BD_YEAST	1	0	0	0	1
sp|P12758|UDP_ECOLI	1	1	1	1	1
sp|P12868|PEP5_YEAST	1	0	0	1	1
sp|P12904|AAKG_YEAST	1	1	0	1	1
sp|P12945|NAT1_YEAST	1	1	1	1	1
sp|P12962|CAF20_YEAST	1	0	0	1	1
sp|P12994|YBHB_ECOLI	1	1	1	1	1
sp|P13024|FDHE_ECOLI	1	1	1	1	1
sp|P13029|KATG_ECOLI	1	1	1	1	1
sp|P13033|GLPB_ECOLI	1	1	0	0	1
sp|P13035|GLPD_ECOLI	1	1	1	1	1
sp|P13130|SS100_YEAST	1	1	0	0	1
sp|P13134|KEX2_YEAST	1	1	1	1	1
sp|P13186|KIN2_YEAST	1	1	0	0	1
sp|P13188|SYQ_YEAST	1	1	1	1	1
sp|P13259|PCY1_YEAST	1	1	1	1	1
sp|P13298|PYRE_YEAST	1	0	0	1	1
sp|P13382|DPOLA_YEAST	1	0	0	0	1
sp|P13393|TBP_YEAST	1	1	1	1	1
sp|P13433|RPOM_YEAST	1	0	0	0	1
sp|P13445|RPOS_ECOLI	1	1	0	0	1
sp|P13482|TREA_ECOLI	1	1	1	0	1
sp|P13517|CAPZB_YEAST	1	1	0	1	1
sp|P13574|STE12_YEAST	1	0	0	1	1
sp|P13586|ATC1_YEAST	1	0	1	0	1
sp|P13663|DHAS_YEAST	1	1	1	1	1
sp|P13712|MSI1_YEAST	1	1	1	1	1
sp|P13856|RSR1_YEAST	1	1	1	1	1
sp|P13857|RIML_ECOLI	1	1	1	1	1
sp|P13902|INO4_YEAST	1	1	1	1	1
sp|P14020|DPM1_YEAST	1	1	1	1	1
sp|P14065|GCY1_YEAST	1	1	1	1	1
sp|P14126|RL3_YEAST	1	1	0	0	1
sp|P14164|ABF1_YEAST	1	1	1	0	1
sp|P14306|CPYI_YEAST	1	1	0	0	1
sp|P14540|ALF_YEAST	1	0	0	0	1
sp|P14680|YAK1_YEAST	1	0	0	0	1
sp|P14682|UBC3_YEAST	1	0	1	1	1
sp|P14693|SAM35_YEAST	1	1	1	1	1
sp|P14741|EI2BA_YEAST	1	0	0	0	1
sp|P14742|GFA1_YEAST	1	1	1	1	1
sp|P14743|NMT_YEAST	1	0	1	0	1
sp|P14747|PP2B2_YEAST	1	1	1	1	1
sp|P14772|BPT1_YEAST	1	0	1	0	1
sp|P14832|CYPH_YEAST	1	0	0	0	1
sp|P14843|AROF_YEAST	1	1	1	1	1
sp|P14900|MURD_ECOLI	1	1	0	0	1
sp|P14904|AMPL_YEAST	1	0	0	1	1
sp|P14906|SEC63_YEAST	1	1	1	1	1
sp|P14907|NSP1_YEAST	1	1	1	0	1
sp|P14908|MTF1_YEAST	1	0	0	1	1
sp|P14922|CYC8_YEAST	1	0	0	1	1
sp|P15034|AMPP_ECOLI	1	1	1	1	1
sp|P15042|DNLJ_ECOLI	1	0	1	0	1
sp|P15108|HSC82_YEAST	1	0	0	0	1
sp|P15180|SYKC_YEAST	1	1	1	1	1
sp|P15254|PUR4_ECOLI	1	1	1	1	1
sp|P15274|AMPD_YEAST	1	1	1	1	1
sp|P15288|PEPD_ECOLI	1	1	1	0	1
sp|P15303|SEC23_YEAST	1	0	1	1	1
sp|P15367|SEC11_YEAST	1	0	0	0	1
sp|P15424|MS116_YEAST	1	1	1	1	1
sp|P15436|DPOD_YEAST	1	0	0	0	1
sp|P15454|KGUA_YEAST	1	1	1	1	1
sp|P15496|IDI1_YEAST	1	1	1	1	1
sp|P15565|TRM1_YEAST	1	0	0	0	1
sp|P15624|SYFB_YEAST	1	1	1	0	1
sp|P15625|SYFA_YEAST	1	1	0	0	1
sp|P15639|PUR9_ECOLI	1	1	1	1	1
sp|P15640|PUR2_ECOLI	1	1	1	1	1
sp|P15646|FBRL_YEAST	1	1	1	1	1
sp|P15700|KCY_YEAST	1	1	1	1	1
sp|P15705|STI1_YEAST	1	0	0	0	1
sp|P15770|AROE_ECOLI	1	1	1	1	1
sp|P15790|CSK21_YEAST	1	1	1	1	1
sp|P15873|PCNA_YEAST	1	1	1	1	1
sp|P15891|ABP1_YEAST	1	0	0	1	1
sp|P15938|PRP16_YEAST	1	0	1	1	1
sp|P15977|MALQ_ECOLI	1	1	1	0	1
sp|P15992|HSP26_YEAST	1	1	1	1	1
sp|P16095|SDHL_ECOLI	1	1	1	1	1
sp|P16120|THRC_YEAST	1	1	0	0	1
sp|P16140|VATB_YEAST	1	1	1	1	1
sp|P16370|RPB3_YEAST	1	1	1	1	1
sp|P16387|ODPA_YEAST	1	1	1	0	1
sp|P16451|ODPX_YEAST	1	0	0	0	1
sp|P16456|SELD_ECOLI	1	1	0	0	1
sp|P16467|PDC5_YEAST	1	1	1	1	1
sp|P16474|BIP_YEAST	1	1	1	1	1
sp|P16521|EF3A_YEAST	1	1	1	1	1
sp|P16528|ICLR_ECOLI	1	0	1	0	1
sp|P16547|OM45_YEAST	1	0	0	0	1
sp|P16550|APA1_YEAST	1	1	1	1	1
sp|P16603|NCPR_YEAST	1	1	1	0	1
sp|P16622|HEMH_YEAST	1	0	0	0	1
sp|P16639|ATE1_YEAST	1	1	0	1	1
sp|P16649|TUP1_YEAST	1	1	0	0	1
sp|P16659|SYP_ECOLI	1	1	1	0	1
sp|P16661|ALG1_YEAST	1	0	0	1	1
sp|P16700|CYSP_ECOLI	1	1	0	0	1
sp|P16861|PFKA1_YEAST	1	1	1	1	1
sp|P16862|PFKA2_YEAST	1	1	1	0	1
sp|P16965|STF2_YEAST	1	1	1	1	1
sp|P17065|SEC2_YEAST	1	0	1	1	1
sp|P17076|RL8A_YEAST	1	1	1	1	1
sp|P17106|CBF1_YEAST	1	1	0	0	1
sp|P17117|NFSA_ECOLI	1	1	1	0	1
sp|P17121|SAC7_YEAST	1	1	1	1	1
sp|P17157|PHO85_YEAST	1	1	1	1	1
sp|P17169|GLMS_ECOLI	1	1	1	1	1
sp|P17255|VATA_YEAST	1	1	1	1	1
sp|P17261|ERS1_YEAST	1	0	1	1	1
sp|P17423|KHSE_YEAST	1	0	0	0	1
sp|P17442|PHO81_YEAST	1	1	0	0	1
sp|P17505|MDHM_YEAST	1	0	0	1	1
sp|P17536|TPM1_YEAST	1	0	0	0	1
sp|P17555|CAP_YEAST	1	1	0	1	1
sp|P17629|HPR1_YEAST	1	0	0	0	1
sp|P17649|GABAT_YEAST	1	1	1	1	1
sp|P17695|GLRX2_YEAST	1	1	0	1	1
sp|P17709|HXKG_YEAST	1	1	1	1	1
sp|P17846|CYSI_ECOLI	1	1	0	1	1
sp|P17883|SKI3_YEAST	1	1	0	1	1
sp|P17890|RPC7_YEAST	1	0	1	0	1
sp|P17891|CLC1_YEAST	1	1	1	1	1
sp|P17898|CPT1_YEAST	1	0	0	1	1
sp|P17967|PDI_YEAST	1	1	1	1	1
sp|P17993|UBIG_ECOLI	1	1	1	1	1
sp|P18196|MINC_ECOLI	1	1	1	1	1
sp|P18238|ADT3_YEAST	1	1	1	1	1
sp|P18239|ADT2_YEAST	1	0	1	1	1
sp|P18390|YJJA_ECOLI	1	1	0	0	1
sp|P18411|FUN14_YEAST	1	1	0	1	1
sp|P18414|ERD2_YEAST	1	1	1	1	1
sp|P18480|SNF5_YEAST	1	1	0	0	1
sp|P18494|GLN3_YEAST	1	0	0	0	1
sp|P18496|ATP10_YEAST	1	1	1	1	1
sp|P18759|SEC18_YEAST	1	1	1	1	1
sp|P18843|NADE_ECOLI	1	1	1	1	1
sp|P18852|GBG_YEAST	1	1	1	1	1
sp|P18888|SNF6_YEAST	1	1	0	1	1
sp|P18898|PGTB1_YEAST	1	1	0	1	1
sp|P18899|DDR48_YEAST	1	1	0	0	1
sp|P18900|COQ1_YEAST	1	0	1	1	1
sp|P18956|GGT_ECOLI	1	1	1	0	1
sp|P18961|YPK2_YEAST	1	0	0	0	1
sp|P19073|CDC42_YEAST	1	1	1	1	1
sp|P19097|FAS2_YEAST	1	1	1	1	1
sp|P19211|IF5A2_YEAST	1	0	0	0	1
sp|P19262|ODO2_YEAST	1	0	1	0	1
sp|P19263|MED14_YEAST	1	0	1	1	1
sp|P19358|METK2_YEAST	1	1	1	1	1
sp|P19414|ACON_YEAST	1	1	1	1	1
sp|P19454|CSK22_YEAST	1	1	1	1	1
sp|P19524|MYO2_YEAST	1	1	0	0	1
sp|P19541|RDS2_YEAST	1	0	0	0	1
sp|P19658|EXO70_YEAST	1	1	1	0	1
sp|P19735|PRP6_YEAST	1	0	1	0	1
sp|P19812|UBR1_YEAST	1	1	1	0	1
sp|P19880|AP1_YEAST	1	1	1	1	1
sp|P19881|PNPP_YEAST	1	1	0	0	1
sp|P19882|HSP60_YEAST	1	0	0	0	1
sp|P19926|AGP_ECOLI	1	1	1	1	1
sp|P19955|RT31_YEAST	1	1	1	1	1
sp|P20049|TYR1_YEAST	1	1	0	1	1
sp|P20051|PYRC_YEAST	1	1	0	1	1
sp|P20053|PRP4_YEAST	1	0	1	1	1
sp|P20081|FKBP_YEAST	1	1	1	1	1
sp|P20084|RM33_YEAST	1	1	1	0	1
sp|P20095|PRP2_YEAST	1	0	0	0	1
sp|P20107|ZRC1_YEAST	1	0	0	0	1
sp|P20424|SRP54_YEAST	1	0	1	1	1
sp|P20434|RPAB1_YEAST	1	0	0	0	1
sp|P20436|RPAB3_YEAST	1	1	1	1	1
sp|P20447|DBP3_YEAST	1	1	1	1	1
sp|P20448|DBP4_YEAST	1	0	0	0	1
sp|P20449|DBP5_YEAST	1	1	1	1	1
sp|P20457|PRI2_YEAST	1	1	1	0	1
sp|P20459|IF2A_YEAST	1	1	1	1	1
sp|P20484|MAK11_YEAST	1	0	0	1	1
sp|P20485|KICH_YEAST	1	1	1	1	1
sp|P20486|CKS1_YEAST	1	0	0	0	1
sp|P20604|PP11_YEAST	1	0	0	0	1
sp|P20606|SAR1_YEAST	1	1	1	1	1
sp|P20676|NUP1_YEAST	1	1	1	1	1
sp|P20967|ODO1_YEAST	1	0	1	1	1
sp|P21151|FADA_ECOLI	1	1	1	1	1
sp|P21165|PEPQ_ECOLI	1	1	1	1	1
sp|P21170|SPEA_ECOLI	1	1	1	1	1
sp|P21177|FADB_ECOLI	1	1	1	0	1
sp|P21179|CATE_ECOLI	1	1	1	0	1
sp|P21182|DCAM_YEAST	1	0	1	1	1
sp|P21242|PSA7_YEAST	1	1	1	1	1
sp|P21243|PSA1_YEAST	1	1	1	0	1
sp|P21264|PUR6_YEAST	1	1	1	1	1
sp|P21269|CCA1_YEAST	1	1	0	0	1
sp|P21304|PWP1_YEAST	1	1	0	0	1
sp|P21339|MSB1_YEAST	1	0	0	0	1
sp|P21367|YCAC_ECOLI	1	1	1	1	1
sp|P21373|UTR1_YEAST	1	0	0	0	1
sp|P21374|ISY1_YEAST	1	0	0	0	1
sp|P21375|OSM1_YEAST	1	1	1	1	1
sp|P21499|RNR_ECOLI	1	1	1	1	1
sp|P21507|SRMB_ECOLI	1	0	1	0	1
sp|P21513|RNE_ECOLI	1	1	1	0	1
sp|P21524|RIR1_YEAST	1	1	0	1	1
sp|P21538|REB1_YEAST	1	1	0	0	1
sp|P21576|VPS1_YEAST	1	1	1	0	1
sp|P21599|KPYK2_ECOLI	1	1	1	0	1
sp|P21645|LPXD_ECOLI	1	1	1	1	1
sp|P21657|DAL81_YEAST	1	1	1	1	1
sp|P21734|UBC1_YEAST	1	0	1	1	1
sp|P21825|SEC62_YEAST	1	1	1	1	1
sp|P21827|RCC1_YEAST	1	1	1	1	1
sp|P21888|SYC_ECOLI	1	1	0	1	1
sp|P21889|SYD_ECOLI	1	1	1	0	1
sp|P21951|DPOE_YEAST	1	1	0	1	1
sp|P21954|IDHP_YEAST	1	0	1	1	1
sp|P21957|OPI1_YEAST	1	1	1	0	1
sp|P21965|MCK1_YEAST	1	1	0	0	1
sp|P22023|KRE5_YEAST	1	0	0	0	1
sp|P22082|SNF2_YEAST	1	0	0	1	1
sp|P22105|TENX_HUMAN	1	0	0	0	0
sp|P22106|ASNB_ECOLI	1	1	1	1	1
sp|P22133|MDHC_YEAST	1	1	1	1	1
sp|P22134|MAG_YEAST	1	0	0	0	1
sp|P22135|ATP12_YEAST	1	1	0	0	1
sp|P22137|CLH_YEAST	1	1	1	1	1
sp|P22138|RPA2_YEAST	1	1	0	0	1
sp|P22139|RPAB5_YEAST	1	1	0	1	1
sp|P22140|EPT1_YEAST	1	1	1	1	1
sp|P22141|PSB4_YEAST	1	1	1	1	1
sp|P22146|GAS1_YEAST	1	1	1	1	1
sp|P22147|XRN1_YEAST	1	1	0	1	1
sp|P22149|AFT1_YEAST	1	0	1	0	1
sp|P22188|MURE_ECOLI	1	1	1	1	1
sp|P22202|HSP74_YEAST	1	1	0	1	1
sp|P22211|NPR1_YEAST	1	1	1	0	1
sp|P22213|SLY1_YEAST	1	0	0	1	1
sp|P22214|SEC22_YEAST	1	1	1	1	1
sp|P22216|RAD53_YEAST	1	0	0	0	1
sp|P22217|TRX1_YEAST	1	1	0	0	1
sp|P22224|SEC15_YEAST	1	0	0	1	1
sp|P22255|CYSQ_ECOLI	1	1	1	0	1
sp|P22256|GABT_ECOLI	1	1	1	1	1
sp|P22259|PCKA_ECOLI	1	1	1	1	1
sp|P22276|RPC2_YEAST	1	1	1	1	1
sp|P22333|ADD_ECOLI	1	1	1	1	1
sp|P22470|SAN1_YEAST	1	1	1	1	1
sp|P22515|UBA1_YEAST	1	1	1	1	1
sp|P22517|KCC2_YEAST	1	1	1	1	1
sp|P22523|MUKB_ECOLI	1	0	1	1	1
sp|P22524|MUKE_ECOLI	1	1	1	1	1
sp|P22543|VPS34_YEAST	1	1	1	1	1
sp|P22564|RIHC_ECOLI	1	1	1	1	1
sp|P22696|ESS1_YEAST	1	1	1	1	1
sp|P22768|ASSY_YEAST	1	1	0	0	1
sp|P22804|BET1_YEAST	1	0	0	0	1
sp|P22855|MAN1_YEAST	1	0	0	1	1
sp|P22936|APN1_YEAST	1	1	0	0	1
sp|P23003|TRMA_ECOLI	1	1	0	1	1
sp|P23060|MAK32_YEAST	1	0	0	0	1
sp|P23180|AIM17_YEAST	1	1	0	1	1
sp|P23201|SPA2_YEAST	1	0	1	0	1
sp|P23202|URE2_YEAST	1	1	1	1	1
sp|P23254|TKT1_YEAST	1	1	1	1	1
sp|P23255|TAF2_YEAST	1	1	0	0	1
sp|P23287|PP2B1_YEAST	1	0	0	1	1
sp|P23291|KC11_YEAST	1	1	1	1	1
sp|P23292|KC12_YEAST	1	1	1	1	1
sp|P23293|BUR1_YEAST	1	0	0	0	1
sp|P23301|IF5A1_YEAST	1	1	1	1	1
sp|P23337|GYS1_YEAST	1	1	0	0	1
sp|P23394|PRP28_YEAST	1	0	0	1	1
sp|P23503|NAR1_YEAST	1	1	1	1	1
sp|P23522|GARL_ECOLI	1	1	1	1	1
sp|P23538|PPSA_ECOLI	1	1	1	0	1
sp|P23542|AATC_YEAST	1	1	1	1	1
sp|P23561|STE11_YEAST	1	0	1	1	1
sp|P23585|HXT2_YEAST	1	1	0	1	1
sp|P23594|PP2A1_YEAST	1	1	1	1	1
sp|P23595|PP2A2_YEAST	1	0	0	1	1
sp|P23615|SPT6_YEAST	1	1	1	1	1
sp|P23638|PSA3_YEAST	1	1	1	0	1
sp|P23639|PSA2_YEAST	1	1	0	0	1
sp|P23641|MPCP_YEAST	1	0	0	0	1
sp|P23642|VAN1_YEAST	1	0	1	1	1
sp|P23643|VPS3_YEAST	1	1	0	0	1
sp|P23644|TOM40_YEAST	1	0	0	1	1
sp|P23721|SERC_ECOLI	1	1	1	1	1
sp|P23724|PSB6_YEAST	1	1	1	1	1
sp|P23776|EXG1_YEAST	1	0	1	1	1
sp|P23827|ECOT_ECOLI	1	1	1	1	1
sp|P23830|PSS_ECOLI	1	1	1	0	1
sp|P23833|SCO1_YEAST	1	1	1	0	1
sp|P23836|PHOP_ECOLI	1	1	1	1	1
sp|P23837|PHOQ_ECOLI	1	1	1	1	1
sp|P23839|YICC_ECOLI	1	1	1	0	1
sp|P23843|OPPA_ECOLI	1	1	1	0	1
sp|P23847|DPPA_ECOLI	1	1	1	1	1
sp|P23857|PSPE_ECOLI	1	1	1	1	1
sp|P23869|PPIB_ECOLI	1	1	1	1	1
sp|P23882|FMT_ECOLI	1	1	1	0	1
sp|P23883|PUUC_ECOLI	1	1	1	0	1
sp|P23893|GSA_ECOLI	1	1	1	0	1
sp|P23917|MAK_ECOLI	1	1	1	1	1
sp|P24000|RL24B_YEAST	1	0	0	1	1
sp|P24004|PEX1_YEAST	1	1	0	0	1
sp|P24171|DCP_ECOLI	1	1	1	0	1
sp|P24182|ACCC_ECOLI	1	1	1	1	1
sp|P24186|FOLD_ECOLI	1	1	1	1	1
sp|P24215|UXUA_ECOLI	1	1	1	1	1
sp|P24255|RP54_ECOLI	1	1	1	1	1
sp|P24276|SSD1_YEAST	1	1	1	1	1
sp|P24279|MCM3_YEAST	1	0	1	1	1
sp|P24521|ERG8_YEAST	1	1	1	1	1
sp|P24583|KPC1_YEAST	1	0	0	0	1
sp|P24783|DBP2_YEAST	1	0	1	1	1
sp|P24784|DBP1_YEAST	1	1	0	0	1
sp|P25037|UBP1_YEAST	1	0	0	0	1
sp|P25039|EFGM_YEAST	1	0	0	0	1
sp|P25040|TSR4_YEAST	1	0	0	0	1
sp|P25043|PSB2_YEAST	1	1	1	1	1
sp|P25044|PTP1_YEAST	1	1	1	1	1
sp|P25045|LCB1_YEAST	1	1	0	1	1
sp|P25087|ERG6_YEAST	1	1	1	1	1
sp|P25208|NFYB_HUMAN	1	1	1	1	0
sp|P25293|NAP1_YEAST	1	1	0	0	1
sp|P25296|CANB_YEAST	1	1	1	0	1
sp|P25297|PHO84_YEAST	1	1	1	0	1
sp|P25298|RNA14_YEAST	1	1	0	0	1
sp|P25299|RNA15_YEAST	1	1	1	1	1
sp|P25302|SWI4_YEAST	1	1	0	0	1
sp|P25303|SCJ1_YEAST	1	1	1	1	1
sp|P25332|RBSK_YEAST	1	1	0	1	1
sp|P25333|HAL4_YEAST	1	0	0	0	1
sp|P25338|MPO1_YEAST	1	0	0	0	1
sp|P25339|PUF4_YEAST	1	1	1	1	1
sp|P25340|ERG4_YEAST	1	1	1	1	1
sp|P25342|CDC10_YEAST	1	1	1	1	1
sp|P25343|RV161_YEAST	1	0	1	1	1
sp|P25345|SYNM_YEAST	1	0	0	0	1
sp|P25349|YCP4_YEAST	1	1	1	1	1
sp|P25353|NPP1_YEAST	1	0	1	0	1
sp|P25355|CTR86_YEAST	1	1	0	0	1
sp|P25357|SNT1_YEAST	1	1	1	1	1
sp|P25358|ELO2_YEAST	1	1	1	1	1
sp|P25365|SED4_YEAST	1	0	1	1	1
sp|P25366|OCA4_YEAST	1	1	1	1	1
sp|P25367|RNQ1_YEAST	1	1	1	1	1
sp|P25369|LSB5_YEAST	1	1	1	1	1
sp|P25371|ADP1_YEAST	1	1	1	1	1
sp|P25373|GLRX1_YEAST	1	1	1	1	1
sp|P25374|NFS1_YEAST	1	1	1	1	1
sp|P25375|PRTD_YEAST	1	1	0	1	1
sp|P25379|STDH_YEAST	1	0	0	0	1
sp|P25386|USO1_YEAST	1	1	1	1	1
sp|P25389|KCC4_YEAST	1	1	1	1	1
sp|P25437|FRMA_ECOLI	1	1	1	1	1
sp|P25441|RPC4_YEAST	1	1	1	1	1
sp|P25443|RS2_YEAST	1	1	1	1	1
sp|P25451|PSB3_YEAST	1	0	1	1	1
sp|P25454|RAD51_YEAST	1	1	1	1	1
sp|P25491|MAS5_YEAST	1	1	1	1	1
sp|P25516|ACNA_ECOLI	1	1	1	0	1
sp|P25519|HFLX_ECOLI	1	1	1	1	1
sp|P25522|MNME_ECOLI	1	1	0	0	1
sp|P25526|GABD_ECOLI	1	1	1	0	1
sp|P25536|NTPPA_ECOLI	1	1	1	0	1
sp|P25539|RIBD_ECOLI	1	1	1	1	1
sp|P25553|ALDA_ECOLI	1	1	1	1	1
sp|P25554|SGF29_YEAST	1	1	1	1	1
sp|P25555|GBP2_YEAST	1	1	1	1	1
sp|P25558|BUD3_YEAST	1	1	0	0	1
sp|P25559|DCC1_YEAST	1	1	1	1	1
sp|P25560|RER1_YEAST	1	1	1	1	1
sp|P25566|MXR2_YEAST	1	1	1	0	1
sp|P25567|SRO9_YEAST	1	1	1	1	1
sp|P25568|ATG22_YEAST	1	1	1	1	1
sp|P25569|GID7_YEAST	1	0	0	0	1
sp|P25573|MGR1_YEAST	1	1	1	1	1
sp|P25574|EMC1_YEAST	1	1	1	1	1
sp|P25576|POF1_YEAST	1	0	0	0	1
sp|P25580|PBN1_YEAST	1	1	0	0	1
sp|P25586|KRR1_YEAST	1	1	0	0	1
sp|P25588|MRC1_YEAST	1	0	0	0	1
sp|P25605|ILV6_YEAST	1	1	1	0	1
sp|P25617|YCQ6_YEAST	1	1	1	1	1
sp|P25619|HSP30_YEAST	1	1	1	1	1
sp|P25623|SYP1_YEAST	1	1	0	1	1
sp|P25626|IMG1_YEAST	1	1	1	1	1
sp|P25627|BUD23_YEAST	1	0	1	1	1
sp|P25628|ARE1_YEAST	1	0	0	0	1
sp|P25631|YCU1_YEAST	1	1	0	1	1
sp|P25632|RSC6_YEAST	1	0	0	1	1
sp|P25635|PWP2_YEAST	1	1	1	1	1
sp|P25638|TAH1_YEAST	1	1	1	1	1
sp|P25639|YCV1_YEAST	1	1	1	1	1
sp|P25644|PAT1_YEAST	1	1	0	1	1
sp|P25651|CSM1_YEAST	1	1	1	1	1
sp|P25655|NOT1_YEAST	1	0	0	0	1
sp|P25656|CDC50_YEAST	1	0	0	0	1
sp|P25694|CDC48_YEAST	1	1	1	1	1
sp|P25738|MSYB_ECOLI	1	1	1	1	1
sp|P25745|MNMA_ECOLI	1	1	0	0	1
sp|P25847|MSH2_YEAST	1	0	0	0	1
sp|P25894|LOIP_ECOLI	1	1	1	1	1
sp|P25906|PDXI_ECOLI	1	1	1	1	1
sp|P26321|RL5_YEAST	1	1	1	1	1
sp|P26570|PPZ1_YEAST	1	1	1	1	1
sp|P26612|AMY2_ECOLI	1	1	1	1	1
sp|P26616|MAO1_ECOLI	1	1	1	1	1
sp|P26637|SYLC_YEAST	1	1	1	1	1
sp|P26646|ACUI_ECOLI	1	1	1	1	1
sp|P26784|RL16A_YEAST	1	1	1	1	1
sp|P26786|RS7A_YEAST	1	1	1	1	1
sp|P26793|FEN1_YEAST	1	1	1	1	1
sp|P27248|GCST_ECOLI	1	1	1	1	1
sp|P27250|AHR_ECOLI	1	1	0	1	1
sp|P27298|OPDA_ECOLI	1	1	1	0	1
sp|P27302|TKT1_ECOLI	1	1	1	1	1
sp|P27306|STHA_ECOLI	1	1	0	0	1
sp|P27351|AP2B_YEAST	1	1	1	1	1
sp|P27431|ROXA_ECOLI	1	1	0	0	1
sp|P27466|KCC1_YEAST	1	1	0	1	1
sp|P27472|GYS2_YEAST	1	1	1	1	1
sp|P27476|NSR1_YEAST	1	1	1	1	1
sp|P27514|PHO91_YEAST	1	0	0	0	1
sp|P27515|URK1_YEAST	1	0	0	1	1
sp|P27550|ACSA_ECOLI	1	1	1	0	1
sp|P27614|CBPS_YEAST	1	1	1	1	1
sp|P27616|PUR7_YEAST	1	1	1	1	1
sp|P27636|CDC15_YEAST	1	0	0	0	1
sp|P27637|BUD14_YEAST	1	1	1	0	1
sp|P27692|SPT5_YEAST	1	0	1	1	1
sp|P27697|COQ8_YEAST	1	0	0	0	1
sp|P27705|MIG1_YEAST	1	1	1	1	1
sp|P27801|PEP3_YEAST	1	0	0	0	1
sp|P27809|KRE2_YEAST	1	1	1	1	1
sp|P27810|KTR1_YEAST	1	1	0	0	1
sp|P27825|CALX_YEAST	1	0	0	1	1
sp|P27828|WECB_ECOLI	1	1	1	0	1
sp|P27848|YIGL_ECOLI	1	1	1	1	1
sp|P27882|ERV1_YEAST	1	0	0	0	1
sp|P27999|RPB9_YEAST	1	0	0	0	1
sp|P28000|RPAC2_YEAST	1	0	0	0	1
sp|P28007|GAR1_YEAST	1	1	1	1	1
sp|P28241|IDH2_YEAST	1	1	1	1	1
sp|P28272|PYRD_YEAST	1	1	1	1	1
sp|P28273|OPLA_YEAST	1	0	0	1	1
sp|P28274|URA7_YEAST	1	1	0	0	1
sp|P28304|QOR1_ECOLI	1	1	1	1	1
sp|P28319|CWP1_YEAST	1	1	1	1	1
sp|P28320|YJU2_YEAST	1	1	0	0	1
sp|P28321|MGLL_YEAST	1	1	0	0	1
sp|P28495|CAPZA_YEAST	1	0	1	1	1
sp|P28496|LAC1_YEAST	1	1	1	1	1
sp|P28625|YIM1_YEAST	1	1	1	1	1
sp|P28707|SBA1_YEAST	1	0	1	1	1
sp|P28777|AROC_YEAST	1	1	1	1	1
sp|P28789|HEM3_YEAST	1	1	1	0	1
sp|P28834|IDH1_YEAST	1	1	1	1	1
sp|P28861|FENR_ECOLI	1	1	1	1	1
sp|P28904|TREC_ECOLI	1	1	1	0	1
sp|P29012|ALR2_ECOLI	1	1	1	1	1
sp|P29013|YCGB_ECOLI	1	0	1	1	1
sp|P29029|CHIT_YEAST	1	1	1	1	1
sp|P29055|TF2B_YEAST	1	1	0	0	1
sp|P29056|TF3B_YEAST	1	0	0	0	1
sp|P29217|YCEH_ECOLI	1	1	1	1	1
sp|P29295|HRR25_YEAST	1	1	1	1	1
sp|P29311|BMH1_YEAST	1	1	0	0	1
sp|P29366|BEM1_YEAST	1	0	0	0	1
sp|P29453|RL8B_YEAST	1	1	0	1	1
sp|P29465|CHS3_YEAST	1	0	0	0	1
sp|P29468|PAP_YEAST	1	0	0	0	1
sp|P29469|MCM2_YEAST	1	1	1	1	1
sp|P29478|SEC65_YEAST	1	0	1	0	1
sp|P29509|TRXB1_YEAST	1	1	1	1	1
sp|P29539|RIF1_YEAST	1	0	0	1	1
sp|P29547|EF1G1_YEAST	1	1	1	1	1
sp|P29680|DCUP_ECOLI	1	1	1	0	1
sp|P29703|FNTA_YEAST	1	0	0	0	1
sp|P29704|ERG9_YEAST	1	0	1	0	1
sp|P29745|PEPT_ECOLI	1	1	1	1	1
sp|P29952|MPI_YEAST	1	1	0	0	1
sp|P30011|NADC_ECOLI	1	1	1	0	1
sp|P30125|LEU3_ECOLI	1	1	1	0	1
sp|P30177|YBIB_ECOLI	1	1	1	1	1
sp|P30619|SEC1_YEAST	1	0	0	0	1
sp|P30624|LCF1_YEAST	1	1	1	1	1
sp|P30657|PSB7_YEAST	1	1	1	1	1
sp|P30665|MCM4_YEAST	1	0	0	0	1
sp|P30771|RENT1_YEAST	1	1	1	0	1
sp|P30822|XPO1_YEAST	1	0	0	0	1
sp|P30850|RNB_ECOLI	1	1	1	1	1
sp|P30859|ARTI_ECOLI	1	1	1	1	1
sp|P30902|ATP7_YEAST	1	0	0	1	1
sp|P30952|MLS1_YEAST	1	0	0	0	1
sp|P30958|MFD_ECOLI	1	1	1	1	1
sp|P31057|PANB_ECOLI	1	1	1	0	1
sp|P31115|PUS3_YEAST	1	1	1	1	1
sp|P31116|DHOM_YEAST	1	1	1	1	1
sp|P31120|GLMM_ECOLI	1	1	1	0	1
sp|P31133|POTF_ECOLI	1	1	1	1	1
sp|P31142|THTM_ECOLI	1	1	0	0	1
sp|P31373|CYS3_YEAST	1	0	1	0	1
sp|P31374|PSK1_YEAST	1	1	1	0	1
sp|P31376|SWC3_YEAST	1	1	1	1	1
sp|P31380|FUN30_YEAST	1	0	0	0	1
sp|P31381|FUN26_YEAST	1	1	0	1	1
sp|P31382|PMT2_YEAST	1	0	0	0	1
sp|P31383|2AAA_YEAST	1	1	1	1	1
sp|P31384|CCR4_YEAST	1	1	1	1	1
sp|P31385|DEP1_YEAST	1	1	1	1	1
sp|P31412|VATC_YEAST	1	1	1	1	1
sp|P31539|HS104_YEAST	1	1	1	1	1
sp|P31658|HCHA_ECOLI	1	1	1	1	1
sp|P31663|PANC_ECOLI	1	1	0	0	1
sp|P31677|OTSA_ECOLI	1	1	0	1	1
sp|P31688|TPS2_YEAST	1	1	1	0	1
sp|P31697|FIMC_ECOLI	1	1	1	1	1
sp|P31755|OCH1_YEAST	1	1	1	1	1
sp|P31787|ACBP_YEAST	1	0	0	0	1
sp|P31806|NNR_ECOLI	1	1	1	1	1
sp|P31979|NUOF_ECOLI	1	1	1	1	1
sp|P32048|SYKM_YEAST	1	1	0	0	1
sp|P32074|COPG_YEAST	1	1	1	1	1
sp|P32157|YIIM_ECOLI	1	1	1	1	1
sp|P32162|YIIS_ECOLI	1	1	1	1	1
sp|P32178|CHMU_YEAST	1	0	0	0	1
sp|P32179|MET22_YEAST	1	0	1	1	1
sp|P32190|GLPK_YEAST	1	1	1	0	1
sp|P32191|GPDM_YEAST	1	1	1	1	1
sp|P32259|MED16_YEAST	1	0	1	1	1
sp|P32264|PROB_YEAST	1	0	0	1	1
sp|P32266|MGM1_YEAST	1	1	1	1	1
sp|P32288|GLNA_YEAST	1	0	0	0	1
sp|P32316|ACH1_YEAST	1	0	1	0	1
sp|P32317|AFG1_YEAST	1	0	1	0	1
sp|P32319|VPS10_YEAST	1	1	0	0	1
sp|P32324|EF2_YEAST	1	1	1	1	1
sp|P32327|PYC2_YEAST	1	1	1	1	1
sp|P32328|DBF20_YEAST	1	1	0	0	1
sp|P32333|BTAF1_YEAST	1	0	0	0	1
sp|P32336|NUD1_YEAST	1	0	0	0	1
sp|P32337|IMB3_YEAST	1	1	1	1	1
sp|P32340|NDI1_YEAST	1	0	1	1	1
sp|P32341|VPH2_YEAST	1	1	0	1	1
sp|P32347|DCUP_YEAST	1	1	1	1	1
sp|P32349|RPC3_YEAST	1	0	1	1	1
sp|P32351|IMPX_YEAST	1	1	0	0	1
sp|P32352|ERG2_YEAST	1	1	1	1	1
sp|P32356|TREA_YEAST	1	1	1	1	1
sp|P32357|AAR2_YEAST	1	0	0	0	1
sp|P32364|SMY1_YEAST	1	0	0	0	1
sp|P32366|VA0D_YEAST	1	1	1	1	1
sp|P32367|TFC1_YEAST	1	0	0	1	1
sp|P32368|SAC1_YEAST	1	1	1	1	1
sp|P32377|MVD1_YEAST	1	1	0	1	1
sp|P32379|PSA5_YEAST	1	1	1	1	1
sp|P32380|SP110_YEAST	1	1	1	0	1
sp|P32381|ARP2_YEAST	1	0	1	1	1
sp|P32386|YBT1_YEAST	1	0	0	1	1
sp|P32419|MDHP_YEAST	1	1	0	1	1
sp|P32432|SFP1_YEAST	1	0	0	0	1
sp|P32445|RIM1_YEAST	1	0	0	0	1
sp|P32447|ASF1_YEAST	1	1	1	1	1
sp|P32449|AROG_YEAST	1	1	1	0	1
sp|P32452|PHA2_YEAST	1	1	0	1	1
sp|P32453|ATP11_YEAST	1	1	1	1	1
sp|P32454|APE2_YEAST	1	1	1	1	1
sp|P32457|CDC3_YEAST	1	1	1	1	1
sp|P32458|CDC11_YEAST	1	1	1	0	1
sp|P32461|DPH2_YEAST	1	1	1	1	1
sp|P32462|ERG24_YEAST	1	1	1	1	1
sp|P32463|ACPM_YEAST	1	1	1	1	1
sp|P32465|HXT1_YEAST	1	1	1	1	1
sp|P32466|HXT3_YEAST	1	1	0	1	1
sp|P32468|CDC12_YEAST	1	0	1	1	1
sp|P32469|DPH5_YEAST	1	1	1	0	1
sp|P32471|EF1B_YEAST	1	1	1	1	1
sp|P32472|FKBP2_YEAST	1	0	1	1	1
sp|P32473|ODPB_YEAST	1	1	1	1	1
sp|P32474|EUG1_YEAST	1	1	0	1	1
sp|P32476|ERG1_YEAST	1	1	0	0	1
sp|P32477|GSH1_YEAST	1	0	1	1	1
sp|P32478|HS150_YEAST	1	1	1	1	1
sp|P32480|HIR2_YEAST	1	1	0	0	1
sp|P32481|IF2G_YEAST	1	1	1	1	1
sp|P32485|HOG1_YEAST	1	1	0	1	1
sp|P32486|KRE6_YEAST	1	0	1	1	1
sp|P32488|ISF1_YEAST	1	0	1	1	1
sp|P32492|MYO4_YEAST	1	0	0	0	1
sp|P32494|NGG1_YEAST	1	1	1	1	1
sp|P32495|NHP2_YEAST	1	0	0	1	1
sp|P32497|EIF3C_YEAST	1	1	0	0	1
sp|P32499|NUP2_YEAST	1	1	1	1	1
sp|P32500|NDC1_YEAST	1	1	1	0	1
sp|P32501|EI2BE_YEAST	1	1	1	1	1
sp|P32502|EI2BB_YEAST	1	1	1	1	1
sp|P32505|NAB2_YEAST	1	1	1	1	1
sp|P32521|PAN1_YEAST	1	0	0	0	1
sp|P32523|PRP19_YEAST	1	1	1	1	1
sp|P32524|PRP21_YEAST	1	0	0	0	1
sp|P32525|ECM25_YEAST	1	1	0	0	1
sp|P32527|ZUO1_YEAST	1	1	1	1	1
sp|P32528|DUR1_YEAST	1	1	1	1	1
sp|P32529|RPA12_YEAST	1	0	0	0	1
sp|P32558|SPT16_YEAST	1	1	0	0	1
sp|P32561|RPD3_YEAST	1	1	1	0	1
sp|P32563|VPP1_YEAST	1	1	1	1	1
sp|P32565|RPN2_YEAST	1	1	1	1	1
sp|P32566|SMI1_YEAST	1	1	0	0	1
sp|P32567|PAH1_YEAST	1	0	1	0	1
sp|P32568|SNQ2_YEAST	1	0	0	1	1
sp|P32570|MED22_YEAST	1	0	0	0	1
sp|P32571|UBP4_YEAST	1	0	1	0	1
sp|P32578|SIP1_YEAST	1	0	1	0	1
sp|P32579|SUA5_YEAST	1	1	1	1	1
sp|P32582|CBS_YEAST	1	1	1	1	1
sp|P32583|SRP40_YEAST	1	1	1	1	1
sp|P32584|STE14_YEAST	1	1	0	0	1
sp|P32585|MED18_YEAST	1	1	0	1	1
sp|P32588|PUB1_YEAST	1	0	0	0	1
sp|P32589|HSP7F_YEAST	1	1	1	0	1
sp|P32590|HSP79_YEAST	1	1	1	1	1
sp|P32591|SWI3_YEAST	1	0	1	1	1
sp|P32597|STH1_YEAST	1	1	1	1	1
sp|P32598|PP12_YEAST	1	1	0	0	1
sp|P32599|FIMB_YEAST	1	1	0	1	1
sp|P32600|TOR2_YEAST	1	0	0	0	1
sp|P32602|SEC17_YEAST	1	1	1	1	1
sp|P32604|F26_YEAST	1	0	0	0	1
sp|P32608|RTG2_YEAST	1	0	0	1	1
sp|P32610|VATD_YEAST	1	1	1	1	1
sp|P32614|FRDS_YEAST	1	1	1	1	1
sp|P32617|IES6_YEAST	1	1	1	1	1
sp|P32618|YEF3_YEAST	1	0	0	1	1
sp|P32621|GDA1_YEAST	1	1	1	1	1
sp|P32623|CRH2_YEAST	1	0	0	1	1
sp|P32626|ENOPH_YEAST	1	1	1	1	1
sp|P32628|RAD23_YEAST	1	0	1	0	1
sp|P32639|BRR2_YEAST	1	0	0	0	1
sp|P32642|GLRX4_YEAST	1	1	1	1	1
sp|P32643|TMT1_YEAST	1	0	1	1	1
sp|P32644|ECM32_YEAST	1	0	0	1	1
sp|P32657|CHD1_YEAST	1	0	1	1	1
sp|P32660|ATC5_YEAST	1	0	0	1	1
sp|P32680|YJAG_ECOLI	1	1	1	0	1
sp|P32684|RLUF_ECOLI	1	1	1	1	1
sp|P32767|KA122_YEAST	1	0	0	1	1
sp|P32769|HBS1_YEAST	1	1	1	0	1
sp|P32770|DRI1_YEAST	1	1	1	0	1
sp|P32771|FADH_YEAST	1	1	0	0	1
sp|P32774|T2AG_YEAST	1	1	1	1	1
sp|P32775|GLGB_YEAST	1	1	1	0	1
sp|P32776|TFB1_YEAST	1	1	1	1	1
sp|P32784|GPT1_YEAST	1	1	0	0	1
sp|P32787|MG101_YEAST	1	1	0	0	1
sp|P32792|YHH7_YEAST	1	0	0	0	1
sp|P32793|YSC84_YEAST	1	1	1	1	1
sp|P32794|AFG2_YEAST	1	1	0	0	1
sp|P32795|YME1_YEAST	1	1	1	0	1
sp|P32796|CACP_YEAST	1	1	1	1	1
sp|P32797|CDC13_YEAST	1	1	1	0	1
sp|P32798|COT1_YEAST	1	1	1	1	1
sp|P32802|TMN1_YEAST	1	0	0	1	1
sp|P32803|EMP24_YEAST	1	1	1	1	1
sp|P32806|GYP6_YEAST	1	0	0	0	1
sp|P32831|NGR1_YEAST	1	0	1	1	1
sp|P32832|RSC7_YEAST	1	0	0	0	1
sp|P32843|YME2_YEAST	1	0	0	0	1
sp|P32855|SEC8_YEAST	1	1	1	1	1
sp|P32857|PTM1_YEAST	1	1	1	0	1
sp|P32860|NFU1_YEAST	1	0	0	0	1
sp|P32861|UGPA1_YEAST	1	0	1	1	1
sp|P32862|RGT1_YEAST	1	1	1	1	1
sp|P32864|RAEP_YEAST	1	0	1	0	1
sp|P32867|SSO1_YEAST	1	1	1	1	1
sp|P32873|BEM3_YEAST	1	0	0	1	1
sp|P32875|LIPA_YEAST	1	1	1	1	1
sp|P32891|DLD1_YEAST	1	1	1	0	1
sp|P32892|DRS1_YEAST	1	0	1	1	1
sp|P32893|TRS65_YEAST	1	0	0	0	1
sp|P32895|KPR1_YEAST	1	0	0	0	1
sp|P32896|PDC2_YEAST	1	1	1	0	1
sp|P32897|TIM23_YEAST	1	1	1	1	1
sp|P32898|PREP_YEAST	1	1	1	0	1
sp|P32899|IMP3_YEAST	1	0	1	0	1
sp|P32900|SKG6_YEAST	1	1	1	1	1
sp|P32902|RT04_YEAST	1	1	0	1	1
sp|P32906|MNS1_YEAST	1	1	1	0	1
sp|P32909|SMY2_YEAST	1	1	0	0	1
sp|P32911|SUI1_YEAST	1	1	1	1	1
sp|P32912|VAM7_YEAST	1	1	0	0	1
sp|P32913|VPS17_YEAST	1	1	1	1	1
sp|P32914|SPT4_YEAST	1	0	0	0	1
sp|P32915|SC61A_YEAST	1	1	1	1	1
sp|P32916|SRPR_YEAST	1	0	0	0	1
sp|P32939|YPT7_YEAST	1	0	1	1	1
sp|P33136|OPGG_ECOLI	1	1	0	0	1
sp|P33195|GCSP_ECOLI	1	1	1	1	1
sp|P33201|MRT4_YEAST	1	0	1	1	1
sp|P33202|UFD4_YEAST	1	1	0	1	1
sp|P33204|ARPC4_YEAST	1	1	0	0	1
sp|P33219|YEBF_ECOLI	1	1	1	1	1
sp|P33221|PURT_ECOLI	1	1	1	1	1
sp|P33297|PRS6A_YEAST	1	1	0	1	1
sp|P33298|PRS6B_YEAST	1	1	1	0	1
sp|P33299|PRS7_YEAST	1	0	1	1	1
sp|P33302|PDR5_YEAST	1	0	0	1	1
sp|P33307|CSE1_YEAST	1	0	0	1	1
sp|P33308|MED9_YEAST	1	0	0	0	1
sp|P33309|DOM34_YEAST	1	0	0	0	1
sp|P33313|CNS1_YEAST	1	1	1	0	1
sp|P33315|TKT2_YEAST	1	1	0	1	1
sp|P33317|DUT_YEAST	1	1	1	1	1
sp|P33322|CBF5_YEAST	1	1	1	1	1
sp|P33324|YKJ1_YEAST	1	1	1	1	1
sp|P33327|DHE2_YEAST	1	1	1	1	1
sp|P33329|PPZ2_YEAST	1	1	1	1	1
sp|P33330|SERC_YEAST	1	1	1	1	1
sp|P33331|NTF2_YEAST	1	1	1	0	1
sp|P33332|SEC3_YEAST	1	0	1	1	1
sp|P33333|PLSC_YEAST	1	1	1	1	1
sp|P33334|PRP8_YEAST	1	0	0	0	1
sp|P33336|SKN1_YEAST	1	1	1	1	1
sp|P33338|SLA2_YEAST	1	1	1	1	1
sp|P33339|TFC4_YEAST	1	0	1	1	1
sp|P33362|YEHZ_ECOLI	1	1	1	1	1
sp|P33363|BGLX_ECOLI	1	1	1	1	1
sp|P33368|YOHF_ECOLI	1	1	0	0	1
sp|P33399|LHP1_YEAST	1	0	1	1	1
sp|P33401|PGM1_YEAST	1	1	1	1	1
sp|P33412|ECT1_YEAST	1	1	0	0	1
sp|P33416|HSP78_YEAST	1	1	0	1	1
sp|P33417|IXR1_YEAST	1	0	0	1	1
sp|P33418|XPOT_YEAST	1	1	0	1	1
sp|P33441|MFT1_YEAST	1	0	0	0	1
sp|P33442|RS3A1_YEAST	1	1	1	1	1
sp|P33570|TKT2_ECOLI	1	1	0	0	1
sp|P33599|NUOCD_ECOLI	1	1	0	0	1
sp|P33602|NUOG_ECOLI	1	1	1	0	1
sp|P33644|PURNU_ECOLI	1	1	1	1	1
sp|P33734|HIS5_YEAST	1	1	1	1	1
sp|P33748|MSN2_YEAST	1	0	0	0	1
sp|P33750|DCA13_YEAST	1	0	1	0	1
sp|P33753|TRM2_YEAST	1	0	0	0	1
sp|P33754|SEC66_YEAST	1	0	0	1	1
sp|P33755|NPL4_YEAST	1	0	1	1	1
sp|P33767|OSTB_YEAST	1	1	1	1	1
sp|P33775|PMT1_YEAST	1	1	1	1	1
sp|P33891|TIP20_YEAST	1	1	0	0	1
sp|P33892|GCN1_YEAST	1	1	1	1	1
sp|P33895|NUF2_YEAST	1	1	1	1	1
sp|P33920|NDPA_ECOLI	1	1	0	1	1
sp|P34072|MKS1_YEAST	1	1	1	1	1
sp|P34077|NIC96_YEAST	1	0	0	1	1
sp|P34078|LTV1_YEAST	1	0	0	0	1
sp|P34110|VPS35_YEAST	1	1	0	1	1
sp|P34111|TFC3_YEAST	1	1	1	1	1
sp|P34160|NCBP1_YEAST	1	0	0	1	1
sp|P34162|MED20_YEAST	1	1	0	0	1
sp|P34163|TGL1_YEAST	1	1	1	1	1
sp|P34164|SIP2_YEAST	1	0	0	0	1
sp|P34167|IF4B_YEAST	1	0	0	0	1
sp|P34216|EDE1_YEAST	1	1	0	0	1
sp|P34217|PIN4_YEAST	1	1	1	1	1
sp|P34220|YBF5_YEAST	1	1	1	1	1
sp|P34221|PP2C3_YEAST	1	1	0	0	1
sp|P34223|UBX1_YEAST	1	1	1	1	1
sp|P34226|SKT5_YEAST	1	0	0	0	1
sp|P34227|PRX1_YEAST	1	1	1	1	1
sp|P34232|MTR2_YEAST	1	1	0	1	1
sp|P34237|CASP_YEAST	1	1	1	0	1
sp|P34240|ZRT3_YEAST	1	1	1	1	1
sp|P34241|URB1_YEAST	1	0	1	1	1
sp|P34243|HCS1_YEAST	1	0	0	0	1
sp|P34247|UTP11_YEAST	1	0	0	1	1
sp|P34250|SEG2_YEAST	1	1	0	0	1
sp|P34253|KTI12_YEAST	1	0	0	1	1
sp|P34756|FAB1_YEAST	1	0	0	1	1
sp|P34758|SCD5_YEAST	1	1	0	0	1
sp|P34760|TSA1_YEAST	1	0	0	0	1
sp|P34761|WHI3_YEAST	1	1	1	1	1
sp|P34909|NOT4_YEAST	1	1	1	1	1
sp|P35056|PEX5_YEAST	1	0	1	1	1
sp|P35127|UBL1_YEAST	1	0	0	0	1
sp|P35169|TOR1_YEAST	1	0	1	0	1
sp|P35176|CYPD_YEAST	1	1	1	1	1
sp|P35178|RRP1_YEAST	1	0	0	0	1
sp|P35181|AP1S1_YEAST	1	0	0	1	1
sp|P35183|AST1_YEAST	1	0	0	0	1
sp|P35184|SQT1_YEAST	1	1	1	1	1
sp|P35189|TAF14_YEAST	1	1	1	0	1
sp|P35191|MDJ1_YEAST	1	1	1	1	1
sp|P35193|ATG19_YEAST	1	0	0	0	1
sp|P35194|UTP20_YEAST	1	1	0	0	1
sp|P35196|RER2_YEAST	1	1	1	0	1
sp|P35197|GCS1_YEAST	1	1	0	1	1
sp|P35201|CENPC_YEAST	1	0	0	0	1
sp|P35202|THI80_YEAST	1	1	0	1	1
sp|P35206|CSG2_YEAST	1	1	1	1	1
sp|P35207|SKI2_YEAST	1	0	1	1	1
sp|P35340|AHPF_ECOLI	1	1	1	0	1
sp|P35688|LRG1_YEAST	1	0	0	0	1
sp|P35718|RPC8_YEAST	1	1	1	1	1
sp|P35719|MRP8_YEAST	1	1	1	1	1
sp|P35724|MNR2_YEAST	1	1	1	1	1
sp|P35725|YKG3_YEAST	1	1	1	0	1
sp|P35729|NU120_YEAST	1	0	0	0	1
sp|P35732|DEF1_YEAST	1	1	1	0	1
sp|P35817|BDF1_YEAST	1	0	1	1	1
sp|P35844|KES1_YEAST	1	1	0	0	1
sp|P35845|OSH1_YEAST	1	1	0	0	1
sp|P36000|AP1B1_YEAST	1	0	0	0	1
sp|P36003|NNK1_YEAST	1	0	0	0	1
sp|P36006|MYO3_YEAST	1	1	0	0	1
sp|P36007|LTHAD_YEAST	1	1	1	0	1
sp|P36008|EF1G2_YEAST	1	0	0	0	1
sp|P36009|DHR2_YEAST	1	1	0	0	1
sp|P36010|NDK_YEAST	1	1	1	1	1
sp|P36013|MAOM_YEAST	1	1	0	1	1
sp|P36014|GPX1_YEAST	1	1	1	1	1
sp|P36015|YKT6_YEAST	1	1	1	1	1
sp|P36016|LHS1_YEAST	1	1	1	1	1
sp|P36018|YPT52_YEAST	1	1	1	0	1
sp|P36023|OAF3_YEAST	1	0	0	0	1
sp|P36024|SIS2_YEAST	1	1	0	0	1
sp|P36029|TPO5_YEAST	1	0	0	0	1
sp|P36035|JEN1_YEAST	1	0	1	1	1
sp|P36036|YRA2_YEAST	1	1	1	1	1
sp|P36037|DOA1_YEAST	1	1	0	0	1
sp|P36040|POC2_YEAST	1	1	1	0	1
sp|P36041|EAP1_YEAST	1	1	1	1	1
sp|P36046|MIA40_YEAST	1	0	0	1	1
sp|P36048|SN114_YEAST	1	0	0	0	1
sp|P36049|EBP2_YEAST	1	1	0	0	1
sp|P36051|MCD4_YEAST	1	0	1	1	1
sp|P36053|ELF1_YEAST	1	0	0	0	1
sp|P36054|RCN1_YEAST	1	0	0	0	1
sp|P36057|SRPB_YEAST	1	0	1	1	1
sp|P36060|MCR1_YEAST	1	1	1	1	1
sp|P36062|AVT3_YEAST	1	0	0	0	1
sp|P36064|COXM1_YEAST	1	1	1	1	1
sp|P36068|SHE2_YEAST	1	1	1	1	1
sp|P36069|PMU1_YEAST	1	1	1	1	1
sp|P36076|CAB3_YEAST	1	0	0	0	1
sp|P36083|YKH5_YEAST	1	1	1	1	1
sp|P36084|MUD2_YEAST	1	1	1	1	1
sp|P36088|FRMSR_YEAST	1	1	1	1	1
sp|P36090|ANR2_YEAST	1	1	1	1	1
sp|P36094|SPC42_YEAST	1	1	1	0	1
sp|P36100|T2EA_YEAST	1	1	1	1	1
sp|P36101|TCD2_YEAST	1	1	0	0	1
sp|P36103|YKC3_YEAST	1	1	1	0	1
sp|P36105|RL14A_YEAST	1	0	0	1	1
sp|P36106|BYE1_YEAST	1	0	0	1	1
sp|P36114|YKR18_YEAST	1	1	1	1	1
sp|P36117|ALY1_YEAST	1	1	1	1	1
sp|P36119|RQT4_YEAST	1	0	0	1	1
sp|P36122|BCH2_YEAST	1	1	1	1	1
sp|P36123|SA190_YEAST	1	1	1	1	1
sp|P36124|SET3_YEAST	1	1	1	1	1
sp|P36125|GMH1_YEAST	1	0	1	1	1
sp|P36132|KAE1_YEAST	1	1	0	0	1
sp|P36136|SHB17_YEAST	1	1	1	1	1
sp|P36139|PET10_YEAST	1	1	1	1	1
sp|P36141|FMP46_YEAST	1	1	1	0	1
sp|P36143|GLG1_YEAST	1	1	0	0	1
sp|P36145|T2EB_YEAST	1	1	0	1	1
sp|P36146|LAS1_YEAST	1	0	0	0	1
sp|P36147|PAM17_YEAST	1	1	1	1	1
sp|P36148|GPT2_YEAST	1	1	1	0	1
sp|P36151|YK50_YEAST	1	1	1	1	1
sp|P36152|DRE2_YEAST	1	1	1	0	1
sp|P36156|GTO2_YEAST	1	1	0	0	1
sp|P36160|RPF2_YEAST	1	1	1	0	1
sp|P36161|NU133_YEAST	1	0	0	0	1
sp|P36162|DAD2_YEAST	1	1	1	1	1
sp|P36163|OMA1_YEAST	1	1	1	1	1
sp|P36165|TGL4_YEAST	1	1	1	1	1
sp|P36166|PXL1_YEAST	1	0	1	0	1
sp|P36168|ESL2_YEAST	1	1	1	1	1
sp|P36169|SKG1_YEAST	1	1	0	1	1
sp|P36421|SYYC_YEAST	1	1	1	0	1
sp|P36516|RM03_YEAST	1	0	0	1	1
sp|P36521|RM11_YEAST	1	1	1	1	1
sp|P36523|RM15_YEAST	1	1	1	1	1
sp|P36528|RM17_YEAST	1	1	1	1	1
sp|P36683|ACNB_ECOLI	1	1	1	1	1
sp|P36767|RDGC_ECOLI	1	1	1	1	1
sp|P36775|LONM_YEAST	1	1	0	0	1
sp|P36929|RSMB_ECOLI	1	1	1	1	1
sp|P36938|PGM_ECOLI	1	1	1	1	1
sp|P36973|APT2_YEAST	1	1	1	1	1
sp|P37005|LAST_ECOLI	1	1	1	0	1
sp|P37012|PGM2_YEAST	1	1	1	1	1
sp|P37020|GEF1_YEAST	1	1	1	1	1
sp|P37051|PURU_ECOLI	1	1	1	1	1
sp|P37095|PEPB_ECOLI	1	1	1	0	1
sp|P37254|ADCS_YEAST	1	1	1	1	1
sp|P37263|YC16_YEAST	1	1	1	0	1
sp|P37267|CBP4_YEAST	1	0	0	0	1
sp|P37291|GLYC_YEAST	1	1	1	1	1
sp|P37292|GLYM_YEAST	1	0	1	1	1
sp|P37293|NAT2_YEAST	1	1	0	0	1
sp|P37296|VPP2_YEAST	1	1	1	1	1
sp|P37297|STT4_YEAST	1	0	0	0	1
sp|P37302|APE3_YEAST	1	1	1	1	1
sp|P37303|GLY1_YEAST	1	1	1	1	1
sp|P37304|PAM1_YEAST	1	1	1	1	1
sp|P37329|MODA_ECOLI	1	1	0	0	1
sp|P37330|MASZ_ECOLI	1	1	1	1	1
sp|P37349|DHAM_ECOLI	1	1	1	0	1
sp|P37370|VRP1_YEAST	1	1	1	1	1
sp|P37387|XYLF_ECOLI	1	1	1	1	1
sp|P37634|RLMJ_ECOLI	1	0	0	0	1
sp|P37647|KDGK_ECOLI	1	1	1	1	1
sp|P37648|YHJJ_ECOLI	1	1	0	0	1
sp|P37666|GHRB_ECOLI	1	1	1	0	1
sp|P37685|ALDB_ECOLI	1	1	1	1	1
sp|P37689|GPMI_ECOLI	1	1	1	0	1
sp|P37744|RMLA1_ECOLI	1	1	0	0	1
sp|P37745|RMLC_ECOLI	1	1	1	1	1
sp|P37747|GLF_ECOLI	1	1	1	0	1
sp|P37759|RMLB1_ECOLI	1	1	1	0	1
sp|P37765|RLUB_ECOLI	1	0	0	0	1
sp|P37769|KDUD_ECOLI	1	1	1	1	1
sp|P37838|NOP4_YEAST	1	1	0	0	1
sp|P37898|AAP1_YEAST	1	0	0	1	1
sp|P37902|GLTI_ECOLI	1	1	1	1	1
sp|P37903|USPF_ECOLI	1	1	1	1	1
sp|P38009|PUR92_YEAST	1	1	1	0	1
sp|P38011|GBLP_YEAST	1	1	1	1	1
sp|P38013|AHP1_YEAST	1	0	0	0	1
sp|P38038|CYSJ_ECOLI	1	1	1	1	1
sp|P38041|BOB1_YEAST	1	1	1	1	1
sp|P38061|RL32_YEAST	1	1	1	1	1
sp|P38063|KPR4_YEAST	1	0	0	1	1
sp|P38065|AP2A_YEAST	1	0	0	0	1
sp|P38066|RIB1_YEAST	1	1	1	0	1
sp|P38067|UGA2_YEAST	1	1	0	0	1
sp|P38069|MNN2_YEAST	1	1	0	1	1
sp|P38070|YPK3_YEAST	1	0	0	0	1
sp|P38071|ETR1_YEAST	1	1	1	0	1
sp|P38072|SCO2_YEAST	1	0	0	1	1
sp|P38074|HMT1_YEAST	1	0	1	1	1
sp|P38075|PDX3_YEAST	1	1	1	1	1
sp|P38077|ATPG_YEAST	1	1	0	1	1
sp|P38079|YRO2_YEAST	1	1	1	1	1
sp|P38080|AKL1_YEAST	1	0	0	0	1
sp|P38081|YBQ6_YEAST	1	1	1	1	1
sp|P38086|RDH54_YEAST	1	1	1	1	1
sp|P38088|SYG_YEAST	1	1	0	0	1
sp|P38089|PP2C4_YEAST	1	1	1	0	1
sp|P38109|ATG42_YEAST	1	1	1	1	1
sp|P38112|MAK5_YEAST	1	1	1	1	1
sp|P38113|ADH5_YEAST	1	1	0	1	1
sp|P38115|ARA1_YEAST	1	1	1	1	1
sp|P38121|DPOA2_YEAST	1	1	0	0	1
sp|P38123|SWD3_YEAST	1	1	1	1	1
sp|P38129|TAF5_YEAST	1	0	0	1	1
sp|P38130|KTR3_YEAST	1	1	1	1	1
sp|P38131|KTR4_YEAST	1	1	1	1	1
sp|P38132|MCM7_YEAST	1	1	0	0	1
sp|P38137|FAT2_YEAST	1	1	0	0	1
sp|P38138|GLU2A_YEAST	1	1	0	0	1
sp|P38139|LDH1_YEAST	1	1	1	1	1
sp|P38143|GPX2_YEAST	1	0	1	1	1
sp|P38144|ISW1_YEAST	1	1	0	0	1
sp|P38145|RISA_YEAST	1	1	1	1	1
sp|P38149|DUG2_YEAST	1	1	1	0	1
sp|P38151|PBP2_YEAST	1	0	1	1	1
sp|P38153|AP3M_YEAST	1	0	0	0	1
sp|P38162|MIX23_YEAST	1	1	0	0	1
sp|P38164|SEA4_YEAST	1	1	0	0	1
sp|P38165|RTG3_YEAST	1	0	0	0	1
sp|P38166|SFT2_YEAST	1	0	0	1	1
sp|P38167|ECM21_YEAST	1	1	1	1	1
sp|P38174|MAP2_YEAST	1	1	1	1	1
sp|P38177|YBI6_YEAST	1	0	1	1	1
sp|P38179|ALG3_YEAST	1	1	0	0	1
sp|P38181|NU170_YEAST	1	0	1	0	1
sp|P38182|ATG8_YEAST	1	1	1	0	1
sp|P38193|PP4R2_YEAST	1	0	1	0	1
sp|P38197|PLPHP_YEAST	1	1	1	1	1
sp|P38199|HEK2_YEAST	1	0	0	0	1
sp|P38203|LSM2_YEAST	1	1	1	1	1
sp|P38205|NCL1_YEAST	1	1	1	1	1
sp|P38206|RFT1_YEAST	1	0	0	1	1
sp|P38212|RCR1_YEAST	1	1	0	0	1
sp|P38217|IMB2_YEAST	1	1	0	1	1
sp|P38218|POA1_YEAST	1	1	1	1	1
sp|P38219|OLA1_YEAST	1	1	1	1	1
sp|P38221|CDS1_YEAST	1	0	1	1	1
sp|P38222|RKM3_YEAST	1	1	1	1	1
sp|P38230|QOR_YEAST	1	1	1	1	1
sp|P38235|YBQ3_YEAST	1	1	0	0	1
sp|P38236|MUM2_YEAST	1	0	1	1	1
sp|P38237|UBP14_YEAST	1	0	0	0	1
sp|P38238|TRM7_YEAST	1	0	0	0	1
sp|P38239|YBR2_YEAST	1	1	0	1	1
sp|P38241|SLT11_YEAST	1	0	1	1	1
sp|P38242|ALG14_YEAST	1	0	0	0	1
sp|P38244|PFF1_YEAST	1	1	0	1	1
sp|P38248|ECM33_YEAST	1	1	0	0	1
sp|P38249|EIF3A_YEAST	1	1	1	0	1
sp|P38250|IST2_YEAST	1	1	1	1	1
sp|P38254|TTL_YEAST	1	1	1	0	1
sp|P38255|RXT2_YEAST	1	1	1	1	1
sp|P38256|YBU6_YEAST	1	1	1	1	1
sp|P38261|EXO84_YEAST	1	0	0	0	1
sp|P38262|SIF2_YEAST	1	0	1	0	1
sp|P38264|PHO88_YEAST	1	1	0	1	1
sp|P38266|AIM3_YEAST	1	1	0	1	1
sp|P38271|OPY1_YEAST	1	1	1	1	1
sp|P38272|SHE3_YEAST	1	1	1	1	1
sp|P38274|HSL7_YEAST	1	1	1	1	1
sp|P38276|YBY7_YEAST	1	0	0	1	1
sp|P38281|APD1_YEAST	1	1	1	1	1
sp|P38284|ICS2_YEAST	1	1	0	0	1
sp|P38288|TOS1_YEAST	1	1	1	1	1
sp|P38293|UMP1_YEAST	1	0	1	1	1
sp|P38295|MCFS2_YEAST	1	0	0	0	1
sp|P38298|YPC1_YEAST	1	0	0	1	1
sp|P38300|MBA1_YEAST	1	1	1	1	1
sp|P38302|NTC20_YEAST	1	1	1	1	1
sp|P38304|MED8_YEAST	1	0	0	1	1
sp|P38310|FTH1_YEAST	1	1	1	1	1
sp|P38312|ERV15_YEAST	1	0	1	0	1
sp|P38313|CENPU_YEAST	1	1	0	0	1
sp|P38314|SDS24_YEAST	1	1	1	1	1
sp|P38315|YBP1_YEAST	1	1	0	0	1
sp|P38318|YB70_YEAST	1	0	0	0	1
sp|P38323|CLPX_YEAST	1	0	0	0	1
sp|P38329|VHC1_YEAST	1	0	1	1	1
sp|P38332|DPH7_YEAST	1	1	1	1	1
sp|P38333|ENP1_YEAST	1	1	0	0	1
sp|P38335|MTC4_YEAST	1	1	1	1	1
sp|P38339|RGD1_YEAST	1	0	1	1	1
sp|P38340|NTM1_YEAST	1	1	1	1	1
sp|P38344|REI1_YEAST	1	1	0	1	1
sp|P38345|SDHF4_YEAST	1	1	1	1	1
sp|P38348|HSM3_YEAST	1	1	1	0	1
sp|P38349|UBX7_YEAST	1	1	0	1	1
sp|P38351|PAF1_YEAST	1	1	1	1	1
sp|P38352|SAF1_YEAST	1	0	1	1	1
sp|P38353|SSH1_YEAST	1	1	1	1	1
sp|P38426|TPS3_YEAST	1	1	1	1	1
sp|P38427|TSL1_YEAST	1	1	1	1	1
sp|P38428|CUE1_YEAST	1	1	0	1	1
sp|P38431|IF5_YEAST	1	0	0	1	1
sp|P38439|LEO1_YEAST	1	0	0	0	1
sp|P38489|NFSB_ECOLI	1	1	1	0	1
sp|P38521|YGGL_ECOLI	1	1	1	1	1
sp|P38523|GRPE_YEAST	1	1	1	1	1
sp|P38604|ERG7_YEAST	1	0	0	0	1
sp|P38615|RIM11_YEAST	1	1	1	0	1
sp|P38616|YGP1_YEAST	1	1	1	1	1
sp|P38620|KPR2_YEAST	1	0	0	0	1
sp|P38623|RCK2_YEAST	1	1	1	1	1
sp|P38625|GUAA_YEAST	1	1	0	0	1
sp|P38626|NCB5R_YEAST	1	1	1	1	1
sp|P38627|URA8_YEAST	1	1	0	0	1
sp|P38628|AGM1_YEAST	1	0	0	0	1
sp|P38629|RFC3_YEAST	1	0	1	1	1
sp|P38630|RFC1_YEAST	1	0	0	0	1
sp|P38631|FKS1_YEAST	1	1	0	1	1
sp|P38634|SIC1_YEAST	1	0	0	0	1
sp|P38636|ATX1_YEAST	1	1	1	1	1
sp|P38682|GLO3_YEAST	1	0	0	0	1
sp|P38688|SRP72_YEAST	1	1	0	1	1
sp|P38689|KPR3_YEAST	1	0	0	0	1
sp|P38691|KSP1_YEAST	1	0	0	0	1
sp|P38692|KIC1_YEAST	1	1	0	1	1
sp|P38694|MSC7_YEAST	1	1	0	0	1
sp|P38695|HXT5_YEAST	1	1	1	1	1
sp|P38698|PPX1_YEAST	1	0	1	1	1
sp|P38700|APM2_YEAST	1	0	1	0	1
sp|P38703|LAG1_YEAST	1	0	0	0	1
sp|P38707|SYNC_YEAST	1	1	0	0	1
sp|P38708|YHI0_YEAST	1	1	1	1	1
sp|P38712|RRP3_YEAST	1	1	1	1	1
sp|P38713|OSH3_YEAST	1	1	1	1	1
sp|P38715|GRE3_YEAST	1	1	1	1	1
sp|P38716|YHR2_YEAST	1	1	0	0	1
sp|P38717|SIP3_YEAST	1	0	0	1	1
sp|P38719|DBP8_YEAST	1	0	0	0	1
sp|P38720|6PGD1_YEAST	1	1	1	1	1
sp|P38732|EFM1_YEAST	1	0	0	0	1
sp|P38736|GOSR1_YEAST	1	1	1	1	1
sp|P38737|ECM29_YEAST	1	0	0	1	1
sp|P38738|OCA5_YEAST	1	1	1	1	1
sp|P38745|YHB7_YEAST	1	1	0	1	1
sp|P38746|YLF2_YEAST	1	0	0	0	1
sp|P38747|OTU2_YEAST	1	0	0	0	1
sp|P38753|HSE1_YEAST	1	1	0	1	1
sp|P38754|RL14B_YEAST	1	0	0	0	1
sp|P38756|TCD1_YEAST	1	1	1	1	1
sp|P38758|TDA3_YEAST	1	1	0	1	1
sp|P38759|VPS29_YEAST	1	0	0	1	1
sp|P38764|RPN1_YEAST	1	1	0	0	1
sp|P38765|YHI9_YEAST	1	1	1	1	1
sp|P38772|BCD1_YEAST	1	1	0	1	1
sp|P38773|DOG2_YEAST	1	0	1	1	1
sp|P38775|YHK5_YEAST	1	1	1	1	1
sp|P38777|FSH1_YEAST	1	1	1	1	1
sp|P38778|SMF2_YEAST	1	1	1	0	1
sp|P38779|CIC1_YEAST	1	1	0	1	1
sp|P38781|RSC30_YEAST	1	1	0	0	1
sp|P38784|VMA22_YEAST	1	1	1	1	1
sp|P38786|RPP1_YEAST	1	1	1	1	1
sp|P38787|PANE_YEAST	1	1	1	1	1
sp|P38788|SSZ1_YEAST	1	0	1	1	1
sp|P38789|SSF1_YEAST	1	1	1	1	1
sp|P38791|DHYS_YEAST	1	1	1	1	1
sp|P38792|RRP4_YEAST	1	1	1	1	1
sp|P38793|TRM5_YEAST	1	1	1	1	1
sp|P38795|NADE_YEAST	1	1	0	1	1
sp|P38796|PPME1_YEAST	1	0	0	0	1
sp|P38798|NMD2_YEAST	1	1	1	0	1
sp|P38800|LAM4_YEAST	1	1	0	0	1
sp|P38801|LRP1_YEAST	1	1	0	0	1
sp|P38803|IPI1_YEAST	1	1	1	1	1
sp|P38804|SDO1L_YEAST	1	0	1	1	1
sp|P38805|RPF1_YEAST	1	0	0	1	1
sp|P38809|YHP7_YEAST	1	1	1	0	1
sp|P38811|TRA1_YEAST	1	0	0	0	1
sp|P38812|GEP4_YEAST	1	1	1	1	1
sp|P38813|BIG1_YEAST	1	0	0	0	1
sp|P38814|SBE22_YEAST	1	1	0	0	1
sp|P38817|GGA2_YEAST	1	1	0	1	1
sp|P38819|ERP5_YEAST	1	0	0	1	1
sp|P38821|DNPEP_YEAST	1	1	1	1	1
sp|P38822|BZZ1_YEAST	1	1	0	0	1
sp|P38823|DMA1_YEAST	1	1	0	1	1
sp|P38825|TOM71_YEAST	1	1	0	1	1
sp|P38827|SET1_YEAST	1	0	0	1	1
sp|P38828|LSM12_YEAST	1	1	0	1	1
sp|P38829|YHS2_YEAST	1	1	1	1	1
sp|P38836|ECM14_YEAST	1	1	1	1	1
sp|P38837|NSG1_YEAST	1	0	0	0	1
sp|P38840|ARO9_YEAST	1	0	1	0	1
sp|P38841|YHT8_YEAST	1	1	1	1	1
sp|P38845|CRP1_YEAST	1	1	1	1	1
sp|P38850|RT107_YEAST	1	1	1	1	1
sp|P38851|LAM1_YEAST	1	1	0	0	1
sp|P38853|KEL1_YEAST	1	1	0	1	1
sp|P38854|TDA11_YEAST	1	0	1	0	1
sp|P38856|AP18A_YEAST	1	1	1	0	1
sp|P38857|MPC2_YEAST	1	1	1	1	1
sp|P38858|SOL3_YEAST	1	1	1	0	1
sp|P38861|NMD3_YEAST	1	1	1	1	1
sp|P38863|SPC97_YEAST	1	0	0	0	1
sp|P38866|FMO1_YEAST	1	1	0	0	1
sp|P38869|SVP26_YEAST	1	0	1	0	1
sp|P38870|YHY2_YEAST	1	1	0	1	1
sp|P38873|KOG1_YEAST	1	1	1	1	1
sp|P38875|GPI16_YEAST	1	1	0	1	1
sp|P38878|LNP_YEAST	1	1	0	0	1
sp|P38879|NACA_YEAST	1	1	1	1	1
sp|P38881|NVJ1_YEAST	1	1	0	0	1
sp|P38882|UTP9_YEAST	1	1	1	1	1
sp|P38883|RIX1_YEAST	1	0	0	0	1
sp|P38885|AIM46_YEAST	1	1	0	1	1
sp|P38886|RPN10_YEAST	1	1	0	0	1
sp|P38889|SKN7_YEAST	1	1	0	0	1
sp|P38890|SET5_YEAST	1	0	0	0	1
sp|P38891|BCA1_YEAST	1	1	1	1	1
sp|P38902|RPB11_YEAST	1	0	1	1	1
sp|P38903|2A5D_YEAST	1	1	1	1	1
sp|P38904|SPP41_YEAST	1	1	1	0	1
sp|P38910|CH10_YEAST	1	1	0	1	1
sp|P38911|FKBP3_YEAST	1	0	1	0	1
sp|P38912|IF1A_YEAST	1	1	0	0	1
sp|P38913|FAD1_YEAST	1	1	1	1	1
sp|P38920|MLH1_YEAST	1	0	0	1	1
sp|P38929|ATC2_YEAST	1	0	0	0	1
sp|P38932|VPS45_YEAST	1	1	0	0	1
sp|P38934|BFR1_YEAST	1	1	1	1	1
sp|P38959|VPS41_YEAST	1	1	0	0	1
sp|P38961|RRP8_YEAST	1	1	1	1	1
sp|P38962|TVP23_YEAST	1	0	1	0	1
sp|P38968|SEC31_YEAST	1	1	0	1	1
sp|P38969|PNT1_YEAST	1	0	0	0	1
sp|P38970|HAL5_YEAST	1	0	0	1	1
sp|P38972|PUR4_YEAST	1	1	0	0	1
sp|P38985|SRP14_YEAST	1	1	0	1	1
sp|P38986|ASPG1_YEAST	1	1	1	1	1
sp|P38987|TEM1_YEAST	1	0	1	1	1
sp|P38989|SMC2_YEAST	1	1	1	1	1
sp|P38990|SAK1_YEAST	1	0	0	0	1
sp|P38993|FET3_YEAST	1	1	1	0	1
sp|P38996|NAB3_YEAST	1	1	1	1	1
sp|P38998|LYS1_YEAST	1	1	1	0	1
sp|P38999|LYS9_YEAST	1	1	0	0	1
sp|P39001|UME6_YEAST	1	1	1	1	1
sp|P39003|HXT6_YEAST	1	1	1	1	1
sp|P39004|HXT7_YEAST	1	1	1	1	1
sp|P39006|PSD1_YEAST	1	0	0	0	1
sp|P39007|STT3_YEAST	1	0	1	1	1
sp|P39008|POP2_YEAST	1	1	1	1	1
sp|P39009|DUN1_YEAST	1	1	0	1	1
sp|P39010|AKR1_YEAST	1	1	0	0	1
sp|P39011|GDS1_YEAST	1	1	1	1	1
sp|P39012|GAA1_YEAST	1	0	0	1	1
sp|P39013|END3_YEAST	1	0	1	1	1
sp|P39015|STM1_YEAST	1	1	0	0	1
sp|P39016|MPT5_YEAST	1	1	1	0	1
sp|P39076|TCPB_YEAST	1	1	1	1	1
sp|P39077|TCPG_YEAST	1	1	1	1	1
sp|P39078|TCPD_YEAST	1	1	1	1	1
sp|P39079|TCPZ_YEAST	1	0	0	0	1
sp|P39081|PCF11_YEAST	1	1	0	1	1
sp|P39099|DEGQ_ECOLI	1	1	1	0	1
sp|P39102|XDJ1_YEAST	1	1	1	1	1
sp|P39104|PIK1_YEAST	1	0	0	1	1
sp|P39105|PLB1_YEAST	1	0	1	1	1
sp|P39106|MNN1_YEAST	1	0	1	0	1
sp|P39107|MNN9_YEAST	1	1	1	1	1
sp|P39109|YCFI_YEAST	1	0	0	0	1
sp|P39111|VATF_YEAST	1	1	1	1	1
sp|P39113|CAT8_YEAST	1	1	1	1	1
sp|P39173|YEAD_ECOLI	1	1	1	0	1
sp|P39177|USPG_ECOLI	1	1	1	0	1
sp|P39180|AG43_ECOLI	1	1	1	0	1
sp|P39187|YTFJ_ECOLI	1	1	1	1	1
sp|P39199|PRMB_ECOLI	1	1	1	1	1
sp|P39265|ALSB_ECOLI	1	1	1	0	1
sp|P39286|RSGA_ECOLI	1	1	0	1	1
sp|P39325|YTFQ_ECOLI	1	1	1	1	1
sp|P39342|YJGR_ECOLI	1	0	1	0	1
sp|P39353|YJHC_ECOLI	1	1	0	0	1
sp|P39356|YJHU_ECOLI	1	1	1	0	1
sp|P39358|YJHG_ECOLI	1	1	1	0	1
sp|P39371|NANM_ECOLI	1	0	0	0	1
sp|P39411|NCPP_ECOLI	1	0	0	0	1
sp|P39451|ADHP_ECOLI	1	1	1	1	1
sp|P39517|DHH1_YEAST	1	1	1	1	1
sp|P39520|IFH1_YEAST	1	0	0	0	1
sp|P39522|ILV3_YEAST	1	1	0	0	1
sp|P39523|YM11_YEAST	1	0	0	0	1
sp|P39524|ATC3_YEAST	1	0	1	0	1
sp|P39531|RCY1_YEAST	1	0	0	1	1
sp|P39538|UBP12_YEAST	1	1	0	1	1
sp|P39547|UIP3_YEAST	1	1	0	0	1
sp|P39676|FHP_YEAST	1	1	1	1	1
sp|P39682|PRP39_YEAST	1	0	1	1	1
[truncated: 3,104 more rows]
