# Supplementary material
Source: Research Square preprint supplement (doi:10.21203/rs.3.rs-9367379/v1)
Supplement: Supplementary file 8 [file db64083bf1e778cee44077ed.xlsx]

## Sheet: view_combination_feature_train
Supp. Data5. Tab1 The view combination features for training the view combination recommendation model. See Supplementary Note 1 to find out the way to calculdate the features. Dt_perform is the minmax scaled MCC score for the view combination based DEA.
view_name	data_idx	acq	platform	dea	view_num	v_cr_pro	v_miss	v_HSIC	v_pca	v_mmd	v_mi	v_entropy	d_cr	d_miss	d_HSIC	d_mmd	d_mi	d_entropy	count_mr	dlfq_mr	maxlfq_mr	top0_mr	top1_mr	top3_mr	comb_mr	mr_reduce	dt_perfom
DIA_dlfq_maxlfq	0	DIA	DIANN	limma	2	0	0.577136	0.498497	0.0383427	1	0	0.460911	0.240667	0.794366	0.143731	0.598622	0.665904	0.865307	0	0	0	0	1	1	0	0.716045	0.971278
DIA_dlfq_top3	0	DIA	DIANN	limma	2	0.754314	0.667634	0.504343	0.268667	0.159662	0.782624	0.0423321	0.61388	0.847887	0.456421	0.24138	0.75286	0.0135895	0	0	1	0	1	0	0	0.948656	0.964605
DIA_dlfq_top1	0	DIA	DIANN	limma	2	1	1	1	0.736308	0.0754117	1	0	1	1	0.856878	0.251099	1	0	0	0	1	0	0	1	0	1	0.954701
DIA_maxlfq_top3	0	DIA	DIANN	limma	2	0.57632	0	0.217906	0	0.834081	0.683614	0.623868	0.524544	0	0.621693	0.206309	0	0.359764	0	1	0	0	1	0	0.7548	0	0.424502
DIA_maxlfq_top1	0	DIA	DIANN	limma	2	0.910078	0.332366	0.627979	0.345512	0.841257	0.998768	0.589975	0.987864	0.152113	1	1	0.24714	0.339437	0	1	0	0	0	1	0.7548	0	0.621386
DIA_top3_top1	0	DIA	DIANN	limma	2	0.206871	0.241868	0	0.505376	0	0.203863	0.179419	0.506818	0.0985916	0.561446	0.0985451	0.24714	0.483673	0	1	1	0	0	0	1	0	0.143352
DIA_dlfq_maxlfq_top3	0	DIA	DIANN	limma	3	0.438144	0.414923	0.406916	0.343131	0.664581	0.488746	0.803526	0.459697	0.547418	0.407282	0.34877	0.472921	0.953422	0	0	0	0	1	0	0	0.716045	0.959351
DIA_dlfq_maxlfq_top1	0	DIA	DIANN	limma	3	0.595328	0.636501	0.708826	0.859484	0.638889	0.666256	0.788049	0.742844	0.648826	0.66687	0.616573	0.637681	0.890618	0	0	0	0	0	1	0	0.716045	0.999834
DIA_dlfq_top3_top1	0	DIA	DIANN	limma	3	0.65084	0.636501	0.501448	1	0.078358	0.662162	0.483212	0.706899	0.648826	0.624915	0.197008	0.666667	0.200474	0	0	1	0	0	0	0	0.948656	0.981738
DIA_maxlfq_top3_top1	0	DIA	DIANN	limma	3	0.572157	0.191411	0.281962	0.67825	0.558446	0.628748	0.90412	0.673075	0.0835681	0.727713	0.434951	0.16476	0.189464	0	1	0	0	0	0	0.7548	0	0.633134
DIA_dlfq_maxlfq_top3_top1	0	DIA	DIANN	limma	4	0.55821	0.469834	0.474788	0.972194	0.485069	0.611478	1	0.645629	0.48216	0.606695	0.399326	0.485507	0.703125	0	0	0	0	0	0	0	0.716045	0.988477
DIA_dlfq_maxlfq	0	DIA	DIANN	ROTS	2	0	0.577136	0.498497	0.0383427	1	0	0.460911	0	0.794366	0	0.914783	0.665904	0.243364	0	0	0	0	1	1	0	0.716045	0.981186
DIA_dlfq_top3	0	DIA	DIANN	ROTS	2	0.754314	0.667634	0.504343	0.268667	0.159662	0.782624	0.0423321	0.504412	0.847887	0.367192	0.518489	0.75286	0.336947	0	0	1	0	1	0	0	0.948656	0.930854
DIA_dlfq_top1	0	DIA	DIANN	ROTS	2	1	1	1	0.736308	0.0754117	1	0	0.902834	1	0.783199	0.162641	1	0.360907	0	0	1	0	0	1	0	1	0.911975
DIA_maxlfq_top3	0	DIA	DIANN	ROTS	2	0.57632	0	0.217906	0	0.834081	0.683614	0.623868	0.461004	0	0.578717	0	0	0.637084	0	1	0	0	1	0	0.7548	0	0.40626
DIA_maxlfq_top1	0	DIA	DIANN	ROTS	2	0.910078	0.332366	0.627979	0.345512	0.841257	0.998768	0.589975	0.946813	0.152113	0.968261	0.510091	0.24714	0.699948	0	1	0	0	0	1	0.7548	0	0.530717
DIA_top3_top1	0	DIA	DIANN	ROTS	2	0.206871	0.241868	0	0.505376	0	0.203863	0.179419	0.447596	0.0985916	0.520424	0.0514203	0.24714	0.358445	0	1	1	0	0	0	1	0	0
DIA_dlfq_maxlfq_top3	0	DIA	DIANN	ROTS	3	0.438144	0.414923	0.406916	0.343131	0.664581	0.488746	0.803526	0.321805	0.547418	0.315303	0.477757	0.472921	0.767301	0	0	0	0	1	0	0	0.716045	0.945744
DIA_dlfq_maxlfq_top1	0	DIA	DIANN	ROTS	3	0.595328	0.636501	0.708826	0.859484	0.638889	0.666256	0.788049	0.616549	0.648826	0.58382	0.529172	0.637681	0.862879	0	0	0	0	0	1	0	0.716045	0.973105
DIA_dlfq_top3_top1	0	DIA	DIANN	ROTS	3	0.65084	0.636501	0.501448	1	0.078358	0.662162	0.483212	0.618281	0.648826	0.556938	0.244183	0.666667	0.388764	0	0	1	0	0	0	0	0.948656	1
DIA_maxlfq_top3_top1	0	DIA	DIANN	ROTS	3	0.572157	0.191411	0.281962	0.67825	0.558446	0.628748	0.90412	0.618471	0.0835681	0.689134	0.18717	0.16476	0.674682	0	1	0	0	0	0	0.7548	0	0.586259
DIA_dlfq_maxlfq_top3_top1	0	DIA	DIANN	ROTS	4	0.55821	0.469834	0.474788	0.972194	0.485069	0.611478	1	0.543776	0.48216	0.536299	0.359571	0.485507	1	0	0	0	0	0	0	0	0.716045	0.982891
DIA_dlfq_maxlfq	1	DIA	DIANN	limma	2	0.796554	0	0.723146	0	1	0.832117	0.463892	0.576449	0	0	0.578975	0	0.782681	0	0	0	0	1	1	0	1	0.233451
DIA_dlfq_top3	1	DIA	DIANN	limma	2	0.947226	0.35079	0.945688	0.425937	0.297664	1	0.0560207	0.524787	0.469205	0.627342	0.115603	0.468794	0	0	0	1	0	1	0	0.00142339	0.970238	0.444681
DIA_dlfq_top1	1	DIA	DIANN	limma	2	1	1	1	0.628302	0.241327	0.953383	0	0.852382	1	0.999046	0.421336	1	0.0517581	0	0	1	0	0	1	0.00384314	0.919643	0.24751
DIA_maxlfq_top3	1	DIA	DIANN	limma	2	0.608471	0.0494767	0	0.067856	0.753512	0.779037	0.5142	0.569277	0.336624	0.619782	0.301067	0.449554	0.12745	0	1	0	0	1	0	0.436553	0	0.937029
DIA_maxlfq_top1	1	DIA	DIANN	limma	2	0.739565	0.701715	0.0816521	0.245748	0.725802	0.836316	0.430232	0.953973	0.87024	0.982038	0.998969	0.982168	0.185372	0	1	0	0	0	1	0.436553	0	0.730455
DIA_top3_top1	1	DIA	DIANN	limma	2	0	0.349143	0.067569	0.468836	0	0	0.223274	0	0.400094	0.749475	0.00246932	0.982168	1	0	1	1	0	0	0	1	0	0.382965
DIA_dlfq_maxlfq_top3	1	DIA	DIANN	limma	3	0.681971	0.133422	0.556278	0.412156	0.683725	0.870385	0.86808	0.556838	0.26861	0.415708	0.331881	0.306116	0.365568	0	0	0	0	1	0	0	1	0.141293
DIA_dlfq_maxlfq_top1	1	DIA	DIANN	limma	3	0.671225	0.567238	0.6016	0.713884	0.65571	0.873939	0.698396	0.794268	0.623413	0.660361	0.666427	0.660723	0.337572	0	0	0	0	0	1	0	1	0.412468
DIA_dlfq_top3_top1	1	DIA	DIANN	limma	3	0.695972	0.566644	0.671086	1	0.179664	0.651128	0.427045	0.459056	0.6231	0.791954	0.179803	0.816987	0.8677	0	0	1	0	0	0	0.00142339	0.970238	0.253138
DIA_maxlfq_top3_top1	1	DIA	DIANN	limma	3	0.496028	0.366778	0.0497404	0.540396	0.493105	0.538451	0.768305	0.50775	0.535653	0.783765	0.434168	0.80463	0.942835	0	1	0	0	0	0	0.436553	0	0.811024
DIA_dlfq_maxlfq_top3_top1	1	DIA	DIANN	limma	4	0.573382	0.408521	0.469676	0.924661	0.503051	0.733476	1	0.579478	0.512694	0.662947	0.40307	0.647114	0.595521	0	0	0	0	0	0	0	1	0.040171
DIA_dlfq_maxlfq	1	DIA	DIANN	ROTS	2	0.796554	0	0.723146	0	1	0.832117	0.463892	0.499725	0	0.00940582	0.579053	0	0.919981	0	0	0	0	1	1	0	1	0.36088
DIA_dlfq_top3	1	DIA	DIANN	ROTS	2	0.947226	0.35079	0.945688	0.425937	0.297664	1	0.0560207	0.547595	0.469205	0.630479	0.119846	0.468794	0.113326	0	0	1	0	1	0	0.00142339	0.970238	0.3101
DIA_dlfq_top1	1	DIA	DIANN	ROTS	2	1	1	1	0.628302	0.241327	0.953383	0	0.862627	1	1	0.440562	1	0.08389	0	0	1	0	0	1	0.00384314	0.919643	0.351796
DIA_maxlfq_top3	1	DIA	DIANN	ROTS	2	0.608471	0.0494767	0	0.067856	0.753512	0.779037	0.5142	0.625019	0.336624	0.623282	0.301903	0.449554	0.0703694	0	1	0	0	1	0	0.436553	0	1
DIA_maxlfq_top1	1	DIA	DIANN	ROTS	2	0.739565	0.701715	0.0816521	0.245748	0.725802	0.836316	0.430232	1	0.87024	0.983803	1	0.982168	0.0815547	0	1	0	0	0	1	0.436553	0	0.829922
DIA_top3_top1	1	DIA	DIANN	ROTS	2	0	0.349143	0.067569	0.468836	0	0	0.223274	0.0611373	0.400094	0.751092	0	0.982168	0.932392	0	1	1	0	0	0	1	0	0.30603
DIA_dlfq_maxlfq_top3	1	DIA	DIANN	ROTS	3	0.681971	0.133422	0.556278	0.412156	0.683725	0.870385	0.86808	0.557446	0.26861	0.421056	0.333601	0.306116	0.882893	0	0	0	0	1	0	0	1	0.387405
DIA_dlfq_maxlfq_top1	1	DIA	DIANN	ROTS	3	0.671225	0.567238	0.6016	0.713884	0.65571	0.873939	0.698396	0.787451	0.623413	0.664403	0.673205	0.660723	0.838202	0	0	0	0	0	1	0	1	0.155569
DIA_dlfq_top3_top1	1	DIA	DIANN	ROTS	3	0.695972	0.566644	0.671086	1	0.179664	0.651128	0.427045	0.490453	0.6231	0.793857	0.186803	0.816987	0.363758	0	0	1	0	0	0	0.00142339	0.970238	0.362405
DIA_maxlfq_top3_top1	1	DIA	DIANN	ROTS	3	0.496028	0.366778	0.0497404	0.540396	0.493105	0.538451	0.768305	0.562052	0.535653	0.786059	0.433968	0.80463	0.607489	0	1	0	0	0	0	0.436553	0	0.76582
DIA_dlfq_maxlfq_top3_top1	1	DIA	DIANN	ROTS	4	0.573382	0.408521	0.469676	0.924661	0.503051	0.733476	1	0.59935	0.512694	0.666344	0.406894	0.647114	0.495164	0	0	0	0	0	0	0	1	0
DIA_dlfq_maxlfq	2	DIA	DIANN	limma	2	0.50583	0.425767	0.91852	0	1	0.609768	0.608995	0.172876	0.322785	0.572813	0.256046	0	0.777538	0	0	0	0	1	1	0	1	1
DIA_dlfq_top3	2	DIA	DIANN	limma	2	0.957008	0.528834	0.449732	0.245349	0.168299	0.900905	0	0.765782	0.443038	0.954119	0.814992	0.175926	0.825209	0	0	1	0	1	0	0	1	0.678445
DIA_dlfq_top1	2	DIA	DIANN	limma	2	1	1	1	0.813093	0.0993697	1	0.0144565	1	1	1	0.882038	1	0	0	0	1	0	0	1	0.00678732	0.958904	0.699049
DIA_maxlfq_top3	2	DIA	DIANN	limma	2	0.493934	0	0.467308	0.00280559	0.703133	0.509508	0.561469	0.51934	0	0.725255	0.192437	0.0648148	0.71774	0	1	0	0	1	0	0.809955	0	0.862065
DIA_maxlfq_top1	2	DIA	DIANN	limma	2	0.615101	0.478528	0.816617	0.443593	0.812834	0.654805	0.526971	0.885931	0.56962	0.901589	0.235423	0.898148	0.167054	0	1	0	0	0	1	0.809955	0	0.869207
DIA_top3_top1	2	DIA	DIANN	limma	2	0	0.37546	0	0.580152	0	0	0.102497	0.370945	0.449367	0.072678	0	0.898148	0.129339	0	1	1	0	0	0	1	0	0
DIA_dlfq_maxlfq_top3	2	DIA	DIANN	limma	3	0.641881	0.3182	0.611853	0.270676	0.623811	0.673394	0.869238	0.485999	0.255274	0.750729	0.421158	0.080247	0.534497	0	0	0	0	1	0	0	1	0.859357
DIA_dlfq_maxlfq_top1	2	DIA	DIANN	limma	3	0.682195	0.634765	0.911712	0.891415	0.637401	0.754858	0.864501	0.686269	0.630802	0.824801	0.457836	0.632716	0.399696	0	0	0	0	0	1	0	1	0.569771
DIA_dlfq_top3_top1	2	DIA	DIANN	limma	3	0.669334	0.634765	0.483244	1	0.089223	0.633635	0.475329	0.712242	0.630802	0.675599	0.565677	0.691358	1	0	0	1	0	0	0	0	1	0.581128
DIA_maxlfq_top3_top1	2	DIA	DIANN	limma	3	0.392039	0.284663	0.427975	0.615217	0.505322	0.388104	0.844163	0.592072	0.339662	0.566507	0.14262	0.62037	0.949823	0	1	0	0	0	0	0.809955	0	0.286363
DIA_dlfq_maxlfq_top3_top1	2	DIA	DIANN	limma	4	0.591991	0.468098	0.608696	0.888578	0.463939	0.612498	1	0.619146	0.464135	0.704409	0.396823	0.506173	0.920096	0	0	0	0	0	0	0	1	0.186566
DIA_dlfq_maxlfq	2	DIA	DIANN	ROTS	2	0.50583	0.425767	0.91852	0	1	0.609768	0.608995	0	0.322785	0.340835	0.135773	0	0.599961	0	0	0	0	1	1	0	1	0.692485
DIA_dlfq_top3	2	DIA	DIANN	ROTS	2	0.957008	0.528834	0.449732	0.245349	0.168299	0.900905	0	0.681317	0.443038	0.85666	0.482798	0.175926	0.554251	0	0	1	0	1	0	0	1	0.780493
DIA_dlfq_top1	2	DIA	DIANN	ROTS	2	1	1	1	0.813093	0.0993697	1	0.0144565	0.957284	1	0.923063	1	1	0.0438389	0	0	1	0	0	1	0.00678732	0.958904	0.939331
DIA_maxlfq_top3	2	DIA	DIANN	ROTS	2	0.493934	0	0.467308	0.00280559	0.703133	0.509508	0.561469	0.486351	0	0.667291	0.140212	0.0648148	0.588575	0	1	0	0	1	0	0.809955	0	0.833502
DIA_maxlfq_top1	2	DIA	DIANN	ROTS	2	0.615101	0.478528	0.816617	0.443593	0.812834	0.654805	0.526971	0.867957	0.56962	0.841352	0.442255	0.898148	0.198986	0	1	0	0	0	1	0.809955	0	0.847847
DIA_top3_top1	2	DIA	DIANN	ROTS	2	0	0.37546	0	0.580152	0	0	0.102497	0.321623	0.449367	0	0.140657	0.898148	0.104974	0	1	1	0	0	0	1	0	0.211764
DIA_dlfq_maxlfq_top3	2	DIA	DIANN	ROTS	3	0.641881	0.3182	0.611853	0.270676	0.623811	0.673394	0.869238	0.389223	0.255274	0.621596	0.252928	0.080247	0.943517	0	0	0	0	1	0	0	1	0.86948
DIA_dlfq_maxlfq_top1	2	DIA	DIANN	ROTS	3	0.682195	0.634765	0.911712	0.891415	0.637401	0.754858	0.864501	0.608414	0.630802	0.70175	0.526009	0.632716	0.827116	0	0	0	0	0	1	0	1	0.954634
DIA_dlfq_top3_top1	2	DIA	DIANN	ROTS	3	0.669334	0.634765	0.483244	1	0.089223	0.633635	0.475329	0.653408	0.630802	0.593241	0.541152	0.691358	0.317859	0	0	1	0	0	0	0	1	0.804958
DIA_maxlfq_top3_top1	2	DIA	DIANN	ROTS	3	0.392039	0.284663	0.427975	0.615217	0.505322	0.388104	0.844163	0.558644	0.339662	0.502881	0.241041	0.62037	0.301729	0	1	0	0	0	0	0.809955	0	0.795783
DIA_dlfq_maxlfq_top3_top1	2	DIA	DIANN	ROTS	4	0.591991	0.468098	0.608696	0.888578	0.463939	0.612498	1	0.552422	0.464135	0.604867	0.390283	0.506173	0.785057	0	0	0	0	0	0	0	1	0.931777
DIA_dlfq_maxlfq	3	DIA	DIANN	limma	2	0.290271	0.59589	0.961808	0	1	0.456313	0.461524	0.0943678	0.453552	0.475667	0.232611	0	0.637902	0	0	0	0	1	1	0	1	0.904171
DIA_dlfq_top3	3	DIA	DIANN	limma	2	0.98303	0.71135	0.545668	0.276451	0.181221	0.981664	0.0165461	0.835153	0.628415	0.976836	0.200401	0.32	0.555111	0	0	1	0	1	0	0	1	0.838337
DIA_dlfq_top1	3	DIA	DIANN	limma	2	1	1	1	0.818786	0.108529	1	0	1	1	1	0.277663	1	0.145389	0	0	1	0	0	1	0	1	0.444605
DIA_maxlfq_top3	3	DIA	DIANN	limma	2	0.702083	0	0.47297	0.121612	0.771965	0.706215	0.310034	0.822294	0	0.847792	1	0.3	0.387536	0	1	0	0	1	0	0.85697	0	0.842537
DIA_maxlfq_top1	3	DIA	DIANN	limma	2	0.77929	0.28865	0.75479	0.504837	0.834142	0.755638	0.27935	0.97318	0.371585	0.871692	0.672323	0.98	0.26135	0	1	0	0	0	1	0.85697	0	0.695308
DIA_top3_top1	3	DIA	DIANN	limma	2	0	0.17319	0	0.645582	0	0	0.0342993	0.397173	0.196721	0.0982089	0.0967341	0.98	0.527235	0	1	1	0	0	0	1	0	0.042906
DIA_dlfq_maxlfq_top3	3	DIA	DIANN	limma	3	0.649713	0.435747	0.660149	0.331377	0.651062	0.714731	0.736543	0.583938	0.360656	0.766765	0.477671	0.206667	0.504675	0	0	0	0	1	0	0	1	0.643236
DIA_dlfq_maxlfq_top1	3	DIA	DIANN	limma	3	0.666963	0.62818	0.905533	0.863998	0.647557	0.737317	0.745025	0.689183	0.608379	0.782453	0.394199	0.66	0.278791	0	0	0	0	0	1	0	1	1
DIA_dlfq_top3_top1	3	DIA	DIANN	limma	3	0.672263	0.62818	0.515223	1	0.0965832	0.660555	0.410245	0.744109	0.608379	0.691682	0.191599	0.766667	0.459075	0	0	1	0	0	0	0	1	0.136027
DIA_maxlfq_top3_top1	3	DIA	DIANN	limma	3	0.507119	0.153947	0.409253	0.730042	0.535369	0.487284	0.674038	0.730882	0.189435	0.605898	0.589686	0.753333	0.524556	0	1	0	0	0	0	0.85697	0	0.792114
DIA_dlfq_maxlfq_top3_top1	3	DIA	DIANN	limma	4	0.619633	0.461513	0.622539	0.930173	0.482643	0.649972	1	0.687028	0.441712	0.711699	0.413289	0.596667	0.44784	0	0	0	0	0	0	0	1	0.793823
DIA_dlfq_maxlfq	3	DIA	DIANN	ROTS	2	0.290271	0.59589	0.961808	0	1	0.456313	0.461524	0	0.453552	0.419875	0.333523	0	0.355361	0	0	0	0	1	1	0	1	0.5135
DIA_dlfq_top3	3	DIA	DIANN	ROTS	2	0.98303	0.71135	0.545668	0.276451	0.181221	0.981664	0.0165461	0.755712	0.628415	0.877818	0.328349	0.32	0.529513	0	0	1	0	1	0	0	1	0.964868
DIA_dlfq_top1	3	DIA	DIANN	ROTS	2	1	1	1	0.818786	0.108529	1	0	0.924568	1	0.904144	0.758497	1	0	0	0	1	0	0	1	0	1	0.733723
DIA_maxlfq_top3	3	DIA	DIANN	ROTS	2	0.702083	0	0.47297	0.121612	0.771965	0.706215	0.310034	0.762089	0	0.712802	0.0661231	0.3	0.693631	0	1	0	0	1	0	0.85697	0	0.830019
DIA_maxlfq_top1	3	DIA	DIANN	ROTS	2	0.77929	0.28865	0.75479	0.504837	0.834142	0.755638	0.27935	0.927735	0.371585	0.739876	0.321328	0.98	0.0835868	0	1	0	0	0	1	0.85697	0	0.792952
DIA_top3_top1	3	DIA	DIANN	ROTS	2	0	0.17319	0	0.645582	0	0	0.0342993	0.374311	0.196721	0	0	0.98	0.171042	0	1	1	0	0	0	1	0	0
DIA_dlfq_maxlfq_top3	3	DIA	DIANN	ROTS	3	0.649713	0.435747	0.660149	0.331377	0.651062	0.714731	0.736543	0.505934	0.360656	0.670165	0.242665	0.206667	0.630383	0	0	0	0	1	0	0	1	0.62444
DIA_dlfq_maxlfq_top1	3	DIA	DIANN	ROTS	3	0.666963	0.62818	0.905533	0.863998	0.647557	0.737317	0.745025	0.617434	0.608379	0.687965	0.471116	0.66	0.723561	0	0	0	0	0	1	0	1	0.645621
DIA_dlfq_top3_top1	3	DIA	DIANN	ROTS	3	0.672263	0.62818	0.515223	1	0.0965832	0.660555	0.410245	0.684864	0.608379	0.593987	0.362282	0.766667	0.697581	0	0	1	0	0	0	0	1	0.582454
DIA_maxlfq_top3_top1	3	DIA	DIANN	ROTS	3	0.507119	0.153947	0.409253	0.730042	0.535369	0.487284	0.674038	0.688045	0.189435	0.484226	0.12915	0.753333	0.918523	0	1	0	0	0	0	0.85697	0	0.752017
DIA_dlfq_maxlfq_top3_top1	3	DIA	DIANN	ROTS	4	0.619633	0.461513	0.622539	0.930173	0.482643	0.649972	1	0.624069	0.441712	0.609086	0.301303	0.596667	1	0	0	0	0	0	0	0	1	0.79306
DIA_dlfq_maxlfq	4	DIA	DIANN	limma	2	0.0758582	0.77449	0.933714	0.0805263	1	0.39326	0.382238	0.0649121	0.767802	0.731615	0.48916	0.554252	0.450788	0	0	0	0	1	1	0	1	0.626708
DIA_dlfq_top3	4	DIA	DIANN	limma	2	0.653344	0.827449	0.551142	0.412579	0.178116	0.837743	0.0071839	0.330329	0.820433	0.575012	0.0215594	0.656892	0.529846	0	0	1	0	1	0	0.000889295	0.998462	0.663533
DIA_dlfq_top1	4	DIA	DIANN	limma	2	0.845899	1	1	0.918824	0.0928029	0.969273	0	0.745802	1	0.786976	0.102991	1	0.801077	0	0	1	0	0	1	0.00177857	0.996923	0.806067
DIA_maxlfq_top3	4	DIA	DIANN	limma	2	0.762834	0	0.288935	0	0.813493	0.865583	0.565518	0.591151	0	0.843107	0.822491	0	0.48671	0	1	0	0	1	0	0.903513	0	0.0866511
DIA_maxlfq_top1	4	DIA	DIANN	limma	2	1	0.173545	0.602505	0.340047	0.85755	1	0.523849	1	0.182663	1	1	0.346041	0.723019	0	1	0	0	0	1	0.903513	0	0.202242
DIA_top3_top1	4	DIA	DIANN	limma	2	0	0.119592	0	0.418317	0	0	0.134623	0.241006	0.126935	0.119159	0.0013404	0.346041	0.531059	0	1	1	0	0	0	1	0	0.399139
DIA_dlfq_maxlfq_top3	4	DIA	DIANN	limma	3	0.486921	0.53398	0.591264	0.436931	0.66387	0.698862	0.765808	0.328797	0.529412	0.716578	0.444403	0.403714	0.869785	0	0	0	0	1	0	0	1	0.792023
DIA_dlfq_maxlfq_top1	4	DIA	DIANN	limma	3	0.636764	0.649345	0.845406	0.938845	0.650117	0.787511	0.734343	0.603571	0.650155	0.83953	0.530717	0.633431	0.988397	0	0	0	0	0	1	0	1	0.880031
DIA_dlfq_top3_top1	4	DIA	DIANN	limma	3	0.498687	0.649014	0.517047	1	0.0903064	0.602339	0.424076	0.439045	0.649123	0.493716	0.0419637	0.667644	0.829056	0	0	1	0	0	0	0.000889295	0.998462	0.924831
DIA_maxlfq_top3_top1	4	DIA	DIANN	limma	3	0.597841	0.0977126	0.297147	0.560774	0.557014	0.621861	0.859598	0.610719	0.103199	0.654089	0.607944	0.230694	0.747562	0	1	0	0	0	0	0.903513	0	0.0307126
DIA_dlfq_maxlfq_top3_top1	4	DIA	DIANN	limma	4	0.552497	0.482513	0.562716	0.948641	0.490327	0.677643	1	0.495533	0.482972	0.675978	0.406257	0.483871	1	0	0	0	0	0	0	0	1	1
DIA_dlfq_maxlfq	4	DIA	DIANN	ROTS	2	0.0758582	0.77449	0.933714	0.0805263	1	0.39326	0.382238	0	0.767802	0.596158	0.278825	0.554252	0.472445	0	0	0	0	1	1	0	1	0.563658
DIA_dlfq_top3	4	DIA	DIANN	ROTS	2	0.653344	0.827449	0.551142	0.412579	0.178116	0.837743	0.0071839	0.344541	0.820433	0.513279	0.0435852	0.656892	0	0	0	1	0	1	0	0.000889295	0.998462	0.667886
DIA_dlfq_top1	4	DIA	DIANN	ROTS	2	0.845899	1	1	0.918824	0.0928029	0.969273	0	0.760079	1	0.751626	0.128818	1	0.645393	0	0	1	0	0	1	0.00177857	0.996923	0.841757
DIA_maxlfq_top3	4	DIA	DIANN	ROTS	2	0.762834	0	0.288935	0	0.813493	0.865583	0.565518	0.519683	0	0.721966	0.634532	0	0.0545792	0	1	0	0	1	0	0.903513	0	0.154614
DIA_maxlfq_top1	4	DIA	DIANN	ROTS	2	1	0.173545	0.602505	0.340047	0.85755	1	0.523849	0.948806	0.182663	0.921318	0.798789	0.346041	0.600254	0	1	0	0	0	1	0.903513	0	0
DIA_top3_top1	4	DIA	DIANN	ROTS	2	0	0.119592	0	0.418317	0	0	0.134623	0.228403	0.126935	0	0	0.346041	0.585082	0	1	1	0	0	0	1	0	0.652427
DIA_dlfq_maxlfq_top3	4	DIA	DIANN	ROTS	3	0.486921	0.53398	0.591264	0.436931	0.66387	0.698862	0.765808	0.288075	0.529412	0.610468	0.318981	0.403714	0.199468	0	0	0	0	1	0	0	1	0.784354
DIA_dlfq_maxlfq_top1	4	DIA	DIANN	ROTS	3	0.636764	0.649345	0.845406	0.938845	0.650117	0.787511	0.734343	0.569628	0.650155	0.756367	0.402144	0.633431	0.882214	0	0	0	0	0	1	0	1	0.819263
DIA_dlfq_top3_top1	4	DIA	DIANN	ROTS	3	0.498687	0.649014	0.517047	1	0.0903064	0.602339	0.424076	0.444341	0.649123	0.421635	0.0574677	0.667644	0.481478	0	0	1	0	0	0	0.000889295	0.998462	0.85244
DIA_maxlfq_top3_top1	4	DIA	DIANN	ROTS	3	0.597841	0.0977126	0.297147	0.560774	0.557014	0.621861	0.859598	0.56563	0.103199	0.547761	0.477774	0.230694	0.468923	0	1	0	0	0	0	0.903513	0	0.104994
DIA_dlfq_maxlfq_top3_top1	4	DIA	DIANN	ROTS	4	0.552497	0.482513	0.562716	0.948641	0.490327	0.677643	1	0.466919	0.482972	0.584058	0.314092	0.483871	0.654058	0	0	0	0	0	0	0	1	0.821554
DIA_dlfq_maxlfq	5	DIA	DIANN	limma	2	0.190518	0.43325	1	0	1	0.347865	0.398845	0.186919	0.307992	0.188749	0.630526	0	0.120121	0	0	0	0	1	1	0	1	0.996132
DIA_dlfq_top3	5	DIA	DIANN	limma	2	0.912161	0.610894	0.555983	0.328895	0.108773	0.99701	0.0337589	0.532419	0.516569	0.740694	0.0131933	0.303371	0.407825	0	0	1	0	1	0	0.000918698	0.956522	0.948659
DIA_dlfq_top1	5	DIA	DIANN	limma	2	1	1	0.975411	0.669894	0.0470747	1	0	0.903263	1	0.960005	0.0234222	1	0.693724	0	0	1	0	0	1	0.000918698	0.956522	0.968492
DIA_maxlfq_top3	5	DIA	DIANN	limma	2	0.562227	0	0.73236	0.0992637	0.817599	0.794222	0.46113	0.65553	0	0.806319	0.646243	0.289326	0.0605998	0	1	0	0	1	0	0.768948	0	0.930423
DIA_maxlfq_top1	5	DIA	DIANN	limma	2	0.688064	0.389106	0.965466	0.420302	0.849056	0.840654	0.405992	1	0.483431	1	0.54542	0.985955	0.639037	0	1	0	0	0	1	0.768948	0	0.947992
DIA_top3_top1	5	DIA	DIANN	limma	2	0	0.210039	0	0.700533	0	0	0.0361838	0.191513	0.270955	0.670731	0	0.985955	0.523099	0	1	1	0	0	0	1	0	0.0229254
DIA_dlfq_maxlfq_top3	5	DIA	DIANN	limma	3	0.543753	0.348048	0.762781	0.376641	0.642124	0.713033	0.752401	0.458289	0.274854	0.578587	0.429987	0.197566	0.571564	0	0	0	0	1	0	0	1	0.998101
DIA_dlfq_maxlfq_top1	5	DIA	DIANN	limma	3	0.590275	0.607452	0.980292	0.834374	0.632043	0.729506	0.723637	0.696727	0.597141	0.716251	0.399789	0.661985	0.794761	0	0	0	0	0	1	0	1	1
DIA_dlfq_top3_top1	5	DIA	DIANN	limma	3	0.651869	0.606978	0.510465	1	0.0519491	0.66567	0.429726	0.542398	0.595841	0.790477	0.0122052	0.763109	0.567841	0	0	1	0	0	0	0.000918698	0.956522	0.960353
DIA_maxlfq_top3_top1	5	DIA	DIANN	limma	3	0.428507	0.199715	0.565942	0.709195	0.555552	0.544959	0.804003	0.615681	0.251462	0.825683	0.397221	0.753745	0.527066	0	1	0	0	0	0	0.768948	0	0.963142
DIA_dlfq_maxlfq_top3_top1	5	DIA	DIANN	limma	4	0.547655	0.440548	0.70487	0.971632	0.470417	0.663292	1	0.578274	0.429825	0.72775	0.309801	0.594101	0.524419	0	0	0	0	0	0	0	1	0.926396
DIA_dlfq_maxlfq	5	DIA	DIANN	ROTS	2	0.190518	0.43325	1	0	1	0.347865	0.398845	0	0.307992	0	1	0	0.750336	0	0	0	0	1	1	0	1	0.982433
DIA_dlfq_top3	5	DIA	DIANN	ROTS	2	0.912161	0.610894	0.555983	0.328895	0.108773	0.99701	0.0337589	0.314873	0.516569	0.559084	0.0807199	0.303371	0.602114	0	0	1	0	1	0	0.000918698	0.956522	0.894715
DIA_dlfq_top1	5	DIA	DIANN	ROTS	2	1	1	0.975411	0.669894	0.0470747	1	0	0.76382	1	0.86219	0.152314	1	0.335026	0	0	1	0	0	1	0.000918698	0.956522	0.854131
DIA_maxlfq_top3	5	DIA	DIANN	ROTS	2	0.562227	0	0.73236	0.0992637	0.817599	0.794222	0.46113	0.58219	0	0.739728	0.530652	0.289326	0.693887	0	1	0	0	1	0	0.768948	0	0.926152
DIA_maxlfq_top1	5	DIA	DIANN	ROTS	2	0.688064	0.389106	0.965466	0.420302	0.849056	0.840654	0.405992	0.971625	0.483431	0.970046	0.39095	0.985955	0.522298	0	1	0	0	0	1	0.768948	0	0.900226
DIA_top3_top1	5	DIA	DIANN	ROTS	2	0	0.210039	0	0.700533	0	0	0.0361838	0.129903	0.270955	0.549485	0.00600587	0.985955	0.294174	0	1	1	0	0	0	1	0	0
DIA_dlfq_maxlfq_top3	5	DIA	DIANN	ROTS	3	0.543753	0.348048	0.762781	0.376641	0.642124	0.713033	0.752401	0.299021	0.274854	0.432937	0.537124	0.197566	1	0	0	0	0	1	0	0	1	0.938486
DIA_dlfq_maxlfq_top1	5	DIA	DIANN	ROTS	3	0.590275	0.607452	0.980292	0.834374	0.632043	0.729506	0.723637	0.578482	0.597141	0.610745	0.514421	0.661985	0.333043	0	0	0	0	0	1	0	1	0.966566
DIA_dlfq_top3_top1	5	DIA	DIANN	ROTS	3	0.651869	0.606978	0.510465	1	0.0519491	0.66567	0.429726	0.402865	0.595841	0.65692	0.0796799	0.763109	0	0	0	1	0	0	0	0.000918698	0.956522	0.892634
DIA_maxlfq_top3_top1	5	DIA	DIANN	ROTS	3	0.428507	0.199715	0.565942	0.709195	0.555552	0.544959	0.804003	0.561239	0.251462	0.753086	0.309203	0.753745	0.155062	0	1	0	0	0	0	0.768948	0	0.934695
DIA_dlfq_maxlfq_top3_top1	5	DIA	DIANN	ROTS	4	0.547655	0.440548	0.70487	0.971632	0.470417	0.663292	1	0.460402	0.429825	0.613422	0.360107	0.594101	0.718903	0	0	0	0	0	0	0	1	0.956602
DIA_dlfq_maxlfq	6	DIA	DIANN	limma	2	0.208712	0.771476	0.905961	0.175457	1	0.401346	0.541351	0	0.984293	0.634886	0.23972	0.888889	0.478025	0	0	0	0	1	1	0	1	0.956348
DIA_dlfq_top3	6	DIA	DIANN	limma	2	0.888498	0.813644	0.859014	0.385344	0.335405	0.993318	0.0355023	0.379813	0.989529	0.650454	0.300373	0.925926	0.510426	0	0	1	0	1	0	0	1	0.951353
DIA_dlfq_top1	6	DIA	DIANN	limma	2	1	1	1	0.995595	0.237126	1	0	0.819067	1	0.998997	0.294383	1	0.148249	0	0	1	0	0	1	0	1	0.950533
DIA_maxlfq_top3	6	DIA	DIANN	limma	2	0.34302	0	0	0	0.786062	0.591124	0.382479	0.531288	0	0.60117	1	0	0.559625	0	1	0	0	1	0	0.942255	0	0.953504
DIA_maxlfq_top1	6	DIA	DIANN	limma	2	0.55625	0.186356	0.114662	0.258354	0.751831	0.749467	0.342759	0.966971	0.0104712	0.953491	0.989434	0.0740739	0.076354	0	1	0	0	0	1	0.942255	0	0.969772
DIA_top3_top1	6	DIA	DIANN	limma	2	0	0.144187	0.0400322	0.368618	0	0	0.177803	0.096783	0.00523559	0	0	0.0740739	0.350859	0	1	1	0	0	0	1	0	0.12468
DIA_dlfq_maxlfq_top3	6	DIA	DIANN	limma	3	0.471751	0.528374	0.588325	0.431903	0.707156	0.661929	0.851952	0.3037	0.657941	0.628837	0.513364	0.604938	1	0	0	0	0	1	0	0	1	0.868717
DIA_dlfq_maxlfq_top1	6	DIA	DIANN	limma	3	0.564152	0.652611	0.673541	0.90748	0.662986	0.716938	0.841459	0.595346	0.664921	0.862458	0.507846	0.654321	0.0639913	0	0	0	0	0	1	0	1	0.971683
DIA_dlfq_top3_top1	6	DIA	DIANN	limma	3	0.631766	0.652611	0.633015	1	0.190844	0.664439	0.73538	0.431888	0.664921	0.549817	0.198252	0.666667	0	0	0	1	0	0	0	0	1	0.887227
DIA_maxlfq_top3_top1	6	DIA	DIANN	limma	3	0.310341	0.110181	0.0515648	0.463866	0.512631	0.446864	0.706636	0.531681	0.00523559	0.518221	0.663145	0.0493824	0.211892	0	1	0	0	0	0	0.942255	0	0.995021
DIA_dlfq_maxlfq_top3_top1	6	DIA	DIANN	limma	4	0.493151	0.485944	0.486612	0.889371	0.518404	0.622542	1	0.465654	0.498255	0.639833	0.470652	0.493827	0.326898	0	0	0	0	0	0	0	1	0.76592
DIA_dlfq_maxlfq	6	DIA	DIANN	ROTS	2	0.208712	0.771476	0.905961	0.175457	1	0.401346	0.541351	0.0107137	0.984293	0.610474	0.278799	0.888889	0.50824	0	0	0	0	1	1	0	1	0.962868
DIA_dlfq_top3	6	DIA	DIANN	ROTS	2	0.888498	0.813644	0.859014	0.385344	0.335405	0.993318	0.0355023	0.420421	0.989529	0.653843	0.172548	0.925926	0.499585	0	0	1	0	1	0	0	1	0.955584
DIA_dlfq_top1	6	DIA	DIANN	ROTS	2	1	1	1	0.995595	0.237126	1	0	0.854938	1	1	0.190987	1	0.191187	0	0	1	0	0	1	0	1	0.875308
DIA_maxlfq_top3	6	DIA	DIANN	ROTS	2	0.34302	0	0	0	0.786062	0.591124	0.382479	0.560751	0	0.632191	0.832827	0	0.738726	0	1	0	0	1	0	0.942255	0	0.885524
DIA_maxlfq_top1	6	DIA	DIANN	ROTS	2	0.55625	0.186356	0.114662	0.258354	0.751831	0.749467	0.342759	1	0.0104712	0.977545	0.874406	0.0740739	0.192935	0	1	0	0	0	1	0.942255	0	0.983822
DIA_top3_top1	6	DIA	DIANN	ROTS	2	0	0.144187	0.0400322	0.368618	0	0	0.177803	0.155022	0.00523559	0.058876	0.000902594	0.0740739	0.0368792	0	1	1	0	0	0	1	0	0
DIA_dlfq_maxlfq_top3	6	DIA	DIANN	ROTS	3	0.471751	0.528374	0.588325	0.431903	0.707156	0.661929	0.851952	0.330628	0.657941	0.63217	0.428058	0.604938	0.978434	0	0	0	0	1	0	0	1	0.914663
DIA_dlfq_maxlfq_top1	6	DIA	DIANN	ROTS	3	0.564152	0.652611	0.673541	0.90748	0.662986	0.716938	0.841459	0.621884	0.664921	0.862673	0.448064	0.654321	0.565618	0	0	0	0	0	1	0	1	0.971453
DIA_dlfq_top3_top1	6	DIA	DIANN	ROTS	3	0.631766	0.652611	0.633015	1	0.190844	0.664439	0.73538	0.476794	0.664921	0.570906	0.121479	0.666667	0.505974	0	0	1	0	0	0	0	1	0.877953
DIA_maxlfq_top3_top1	6	DIA	DIANN	ROTS	3	0.310341	0.110181	0.0515648	0.463866	0.512631	0.446864	0.706636	0.571924	0.00523559	0.556204	0.569379	0.0493824	0.679788	0	1	0	0	0	0	0.942255	0	1
DIA_dlfq_maxlfq_top3_top1	6	DIA	DIANN	ROTS	4	0.493151	0.485944	0.486612	0.889371	0.518404	0.622542	1	0.500308	0.498255	0.655488	0.391745	0.493827	0.891557	0	0	0	0	0	0	0	1	0.734317
DDA_dlfq_maxlfq	0	DDA	FragPipe	limma	2	0	0.983282	0.124417	0.795662	0.62089	0.282298	0.248558	0.0721179	0.97076	0.776237	0.609239	0.967195	0.807586	1	0	0	1	0	1	0.682967	0.000606431	0.66383
DDA_dlfq_top0	0	DDA	FragPipe	limma	2	0.50011	0.0162283	0	0.0323903	0.00385122	0.529992	0	0.529889	0.0292398	0.506077	0.238588	0.0271493	0.404817	1	0	1	0	0	1	0.628313	0.00758035	0.933494
DDA_dlfq_top3	0	DDA	FragPipe	limma	2	0.50739	0.0202154	0.12769	0.0586951	0	0.533772	0.0327807	0.462811	0.0315789	0.45098	0.0438878	0.0294118	0	1	0	1	1	0	0	0.628724	0.02547	0.704005
DDA_dlfq_count	0	DDA	FragPipe	limma	2	1	0.627518	0.936716	0.394578	0.167641	1	0.990674	0.92823	0.594152	0.923978	0.0349291	0.411765	0.303496	0	0	1	1	0	1	0.00575303	1	0.959338
DDA_maxlfq_top0	0	DDA	FragPipe	limma	2	0.456783	1	0.502766	0.798623	0.786793	0.554834	0.252183	0.619222	1	0.879751	0.638104	0.967195	0.19088	1	1	0	0	0	1	0.63345	0	0.135074
DDA_maxlfq_top3	0	DDA	FragPipe	limma	2	0.457944	0.997132	0.288017	0.799624	0.751348	0.541889	0.253201	0.52982	0.997661	0.842373	1	0.967195	0.0813535	1	1	0	1	0	0	0.643929	0.00303213	0.00595941
DDA_maxlfq_count	0	DDA	FragPipe	limma	2	0.997851	0.937815	0.739494	0.308038	1	0.825312	0.997215	0.890825	0.837427	1	0.214048	1	0.103532	0	1	0	1	0	1	1	0.271377	0.00640134
DDA_top0_top3	0	DDA	FragPipe	limma	2	0.180399	0	0.121032	0	0.00312122	0	0.0234686	0.199653	0	0.0915181	0.0550745	0	0.396593	1	1	1	0	0	0	0.63345	0	0.54075
DDA_top0_count	0	DDA	FragPipe	limma	2	0.905651	0.61094	1	0.400976	0.0888032	0.971267	0.990155	0.913247	0.57193	0.886788	0.295996	0.386878	0.804455	0	1	1	0	0	1	0.00513664	0.927229	0.37456
DDA_top3_count	0	DDA	FragPipe	limma	2	0.974025	0.613388	0.996253	0.402546	0.129242	0.995565	0.990399	0.993956	0.569591	0.899601	0.303744	0.386878	0.223675	0	1	1	1	0	0	0.00780769	0.941783	0.679556
DDA_dlfq_maxlfq_top0	0	DDA	FragPipe	limma	3	0.33771	0.666503	0.209061	0.808063	0.470512	0.455708	0.362642	0.407076	0.666667	0.720689	0.49531	0.653846	0.506618	1	0	0	0	0	1	0.628313	0.00758035	0.780429
DDA_dlfq_maxlfq_top3	0	DDA	FragPipe	limma	3	0.338444	0.666877	0.180041	0.821768	0.457413	0.452653	0.345948	0.354916	0.666667	0.689863	0.551042	0.6546	0.373769	1	0	0	1	0	0	0.628724	0.02547	0.742715
DDA_dlfq_maxlfq_count	0	DDA	FragPipe	limma	3	0.709624	0.849538	0.600209	0.876274	0.596177	0.702537	0.998618	0.630391	0.80078	0.900072	0.286072	0.792986	0.426521	0	0	0	1	0	1	0.00575303	1	0.786473
DDA_dlfq_top0_top3	0	DDA	FragPipe	limma	3	0.39465	0.0121479	0.0829071	0.0500526	0.00232414	0.354588	0.133524	0.397451	0.0202729	0.349525	0.112517	0.0188537	0.366812	1	0	1	0	0	0	0.628313	0.00758035	0.886821
DDA_dlfq_top0_count	0	DDA	FragPipe	limma	3	0.720424	0.418229	0.645572	0.425369	0.086765	0.833753	0.994843	0.790455	0.398441	0.772281	0.189838	0.275264	0.865933	0	0	1	0	0	1	0	0.934809	0.965503
DDA_dlfq_top3_count	0	DDA	FragPipe	limma	3	0.741762	0.420374	0.686886	0.437966	0.0989609	0.843112	0.994528	0.794999	0.398441	0.758186	0.12752	0.276018	0.225662	0	0	1	1	0	0	0	0.953305	0.957617
DDA_maxlfq_top0_top3	0	DDA	FragPipe	limma	3	0.230393	0.665711	0.303938	0.795015	0.513754	0.365574	0.349081	0.449565	0.665887	0.604547	0.564393	0.644796	0.256759	1	1	0	0	0	0	0.63345	0	0.0756462
DDA_maxlfq_top0_count	0	DDA	FragPipe	limma	3	0.795851	0.849585	0.74742	0.883152	0.625199	0.783805	0.998679	0.807765	0.803119	0.92218	0.382716	0.784691	0.633182	0	1	0	0	0	1	0.00513664	0.927229	0.043325
DDA_maxlfq_top3_count	0	DDA	FragPipe	limma	3	0.821343	0.849445	0.674588	0.886711	0.626863	0.787589	0.998295	0.804867	0.801559	0.913991	0.505931	0.784691	0.0798322	0	1	0	1	0	0	0.00760222	0.942086	0.187993
DDA_top0_top3_count	0	DDA	FragPipe	limma	3	0.553128	0.408109	0.705762	0.402358	0.0737222	0.655611	0.994487	0.702286	0.380507	0.625969	0.218271	0.257919	0.573349	0	1	1	0	0	0	0.00513664	0.927229	0.632392
DDA_dlfq_maxlfq_top0_top3	0	DDA	FragPipe	limma	4	0.324705	0.50281	0.193987	0.80586	0.361001	0.407131	0.439457	0.402252	0.504873	0.591156	0.430815	0.493024	0.167411	1	0	0	0	0	0	0.628313	0.00758035	0.651984
DDA_dlfq_maxlfq_top0_count	0	DDA	FragPipe	limma	4	0.598784	0.695964	0.550565	0.987913	0.444663	0.693951	0.999583	0.658922	0.667251	0.828805	0.338484	0.626697	0.572587	0	0	0	0	0	1	0	0.934809	0.423305
DDA_dlfq_maxlfq_top3_count	0	DDA	FragPipe	limma	4	0.609565	0.696558	0.535431	0.997074	0.444854	0.696473	0.99927	0.646293	0.666862	0.815528	0.367641	0.627074	0.0537737	0	0	0	1	0	0	0	0.953305	0.882205
DDA_dlfq_top0_top3_count	0	DDA	FragPipe	limma	4	0.601199	0.314715	0.530282	0.42194	0.0654431	0.671766	0.9968	0.671298	0.299415	0.62649	0.162037	0.207014	0.71318	0	0	1	0	0	0	0	0.934809	0.839221
DDA_maxlfq_top0_top3_count	0	DDA	FragPipe	limma	4	0.517856	0.693213	0.607927	0.981522	0.459885	0.648145	0.999323	0.691121	0.662768	0.766672	0.417828	0.618024	0.487251	0	1	0	0	0	0	0.00513664	0.927229	0.28718
DDA_dlfq_maxlfq_top0_top3_count	0	DDA	FragPipe	limma	5	0.529569	0.580652	0.483638	1	0.355169	0.623493	1	0.613977	0.560234	0.72573	0.343361	0.514367	0.551649	0	0	0	0	0	0	0	0.934809	0.861294
DDA_dlfq_maxlfq	0	DDA	FragPipe	ROTS	2	0	0.983282	0.124417	0.795662	0.62089	0.282298	0.248558	0	0.97076	0.619412	0.659018	0.967195	0.815798	1	0	0	1	0	1	0.682967	0.000606431	0.575235
DDA_dlfq_top0	0	DDA	FragPipe	ROTS	2	0.50011	0.0162283	0	0.0323903	0.00385122	0.529992	0	0.429688	0.0292398	0.388657	0.315374	0.0271493	0.327383	1	0	1	0	0	1	0.628313	0.00758035	0.873555
DDA_dlfq_top3	0	DDA	FragPipe	ROTS	2	0.50739	0.0202154	0.12769	0.0586951	0	0.533772	0.0327807	0.368888	0.0315789	0.316663	0.0502551	0.0294118	0.511689	1	0	1	1	0	0	0.628724	0.02547	0.823607
DDA_dlfq_count	0	DDA	FragPipe	ROTS	2	1	0.627518	0.936716	0.394578	0.167641	1	0.990674	0.895026	0.594152	0.881538	0.576176	0.411765	0.4363	0	0	1	1	0	1	0.00575303	1	1
DDA_maxlfq_top0	0	DDA	FragPipe	ROTS	2	0.456783	1	0.502766	0.798623	0.786793	0.554834	0.252183	0.479733	1	0.800154	0.545377	0.967195	0.717796	1	1	0	0	0	1	0.63345	0	0.0543803
DDA_maxlfq_top3	0	DDA	FragPipe	ROTS	2	0.457944	0.997132	0.288017	0.799624	0.751348	0.541889	0.253201	0.403605	0.997661	0.748144	0.715424	0.967195	0.906742	1	1	0	1	0	0	0.643929	0.00303213	0
DDA_maxlfq_count	0	DDA	FragPipe	ROTS	2	0.997851	0.937815	0.739494	0.308038	1	0.825312	0.997215	0.8373	0.837427	0.96857	0.200564	1	0.27017	0	1	0	1	0	1	1	0.271377	0.053964
DDA_top0_top3	0	DDA	FragPipe	ROTS	2	0.180399	0	0.121032	0	0.00312122	0	0.0234686	0.12768	0	0	0	0	0.406677	1	1	1	0	0	0	0.63345	0	0.451335
DDA_top0_count	0	DDA	FragPipe	ROTS	2	0.905651	0.61094	1	0.400976	0.0888032	0.971267	0.990155	0.91245	0.57193	0.872967	0.635863	0.386878	0.770225	0	1	1	0	0	1	0.00513664	0.927229	0.71541
DDA_top3_count	0	DDA	FragPipe	ROTS	2	0.974025	0.613388	0.996253	0.402546	0.129242	0.995565	0.990399	1	0.569591	0.889903	0.71795	0.386878	0.364297	0	1	1	1	0	0	0.00780769	0.941783	0.568412
DDA_dlfq_maxlfq_top0	0	DDA	FragPipe	ROTS	3	0.33771	0.666503	0.209061	0.808063	0.470512	0.455708	0.362642	0.30314	0.666667	0.602741	0.50659	0.653846	0.946356	1	0	0	0	0	1	0.628313	0.00758035	0.935599
DDA_dlfq_maxlfq_top3	0	DDA	FragPipe	ROTS	3	0.338444	0.666877	0.180041	0.821768	0.457413	0.452653	0.345948	0.257497	0.666667	0.561406	0.474899	0.6546	1	1	0	0	1	0	0	0.628724	0.02547	0.788705
DDA_dlfq_maxlfq_count	0	DDA	FragPipe	ROTS	3	0.709624	0.849538	0.600209	0.876274	0.596177	0.702537	0.998618	0.577442	0.80078	0.823174	0.478586	0.792986	0.725622	0	0	0	1	0	1	0.00575303	1	0.850443
DDA_dlfq_top0_top3	0	DDA	FragPipe	ROTS	3	0.39465	0.0121479	0.0829071	0.0500526	0.00232414	0.354588	0.133524	0.308752	0.0202729	0.235106	0.121877	0.0188537	0.486018	1	0	1	0	0	0	0.628313	0.00758035	0.843445
DDA_dlfq_top0_count	0	DDA	FragPipe	ROTS	3	0.720424	0.418229	0.645572	0.425369	0.086765	0.833753	0.994843	0.745721	0.398441	0.714387	0.509138	0.275264	0.906092	0	0	1	0	0	1	0	0.934809	0.805658
DDA_dlfq_top3_count	0	DDA	FragPipe	ROTS	3	0.741762	0.420374	0.686886	0.437966	0.0989609	0.843112	0.994528	0.754638	0.398441	0.696035	0.448127	0.276018	0.555323	0	0	1	1	0	0	0	0.953305	0.937027
DDA_maxlfq_top0_top3	0	DDA	FragPipe	ROTS	3	0.230393	0.665711	0.303938	0.795015	0.513754	0.365574	0.349081	0.337006	0.665887	0.516099	0.420267	0.644796	0.874489	1	1	0	0	0	0	0.63345	0	0.0661484
DDA_maxlfq_top0_count	0	DDA	FragPipe	ROTS	3	0.795851	0.849585	0.74742	0.883152	0.625199	0.783805	0.998679	0.743161	0.803119	0.880564	0.460601	0.784691	0.50857	0	1	0	0	0	1	0.00513664	0.927229	0.0114407
DDA_maxlfq_top3_count	0	DDA	FragPipe	ROTS	3	0.821343	0.849445	0.674588	0.886711	0.626863	0.787589	0.998295	0.746968	0.801559	0.868873	0.544646	0.784691	0.405797	0	1	0	1	0	0	0.00760222	0.942086	0.0103514
DDA_top0_top3_count	0	DDA	FragPipe	ROTS	3	0.553128	0.408109	0.705762	0.402358	0.0737222	0.655611	0.994487	0.680043	0.380507	0.587624	0.451271	0.257919	0.828957	0	1	1	0	0	0	0.00513664	0.927229	0.855138
DDA_dlfq_maxlfq_top0_top3	0	DDA	FragPipe	ROTS	4	0.324705	0.50281	0.193987	0.80586	0.361001	0.407131	0.439457	0.301599	0.504873	0.478838	0.380908	0.493024	0.983845	1	0	0	0	0	0	0.628313	0.00758035	0.687305
DDA_dlfq_maxlfq_top0_count	0	DDA	FragPipe	ROTS	4	0.598784	0.695964	0.550565	0.987913	0.444663	0.693951	0.999583	0.592366	0.667251	0.755217	0.488729	0.626697	0.57247	0	0	0	0	0	1	0	0.934809	0.717825
DDA_dlfq_maxlfq_top3_count	0	DDA	FragPipe	ROTS	4	0.609565	0.696558	0.535431	0.997074	0.444854	0.696473	0.99927	0.584136	0.666862	0.737372	0.486565	0.627074	0.770746	0	0	0	1	0	0	0	0.953305	0.628051
DDA_dlfq_top0_top3_count	0	DDA	FragPipe	ROTS	4	0.601199	0.314715	0.530282	0.42194	0.0654431	0.671766	0.9968	0.622289	0.299415	0.558288	0.382603	0.207014	0.905017	0	0	1	0	0	0	0	0.934809	0.617945
DDA_maxlfq_top0_top3_count	0	DDA	FragPipe	ROTS	4	0.517856	0.693213	0.607927	0.981522	0.459885	0.648145	0.999323	0.626794	0.662768	0.71329	0.469196	0.618024	0.524935	0	1	0	0	0	0	0.00513664	0.927229	0.144631
DDA_dlfq_maxlfq_top0_top3_count	0	DDA	FragPipe	ROTS	5	0.529569	0.580652	0.483638	1	0.355169	0.623493	1	0.545437	0.560234	0.648601	0.4416	0.514367	0.588093	0	0	0	0	0	0	0	0.934809	0.83228
DDA_dlfq_maxlfq	1	DDA	FragPipe	limma	2	0	0.844361	0	0.663431	0.500021	0.17102	0.251656	0	0.779146	0.866349	0.241259	0.985479	0.845023	1	0	0	1	0	1	1	0.00160371	0.643017
DDA_dlfq_top0	1	DDA	FragPipe	limma	2	0.657651	0.0353512	0.135956	0.0659278	0.0126786	0.588587	0	0.631508	0.0533662	0.580432	0.466876	0.0609874	0.297063	1	0	1	0	0	1	0.881411	0.00552388	0.605223
DDA_dlfq_top3	1	DDA	FragPipe	limma	2	0.63635	0.0407216	0.25279	0.0934257	0.00103549	0.588752	0.0276366	0.624205	0.0566502	0.627381	0.225044	0.0667958	0.261389	1	0	1	1	0	0	0.888212	0.0324305	0.683833
DDA_dlfq_count	1	DDA	FragPipe	limma	2	1	0.640179	0.95435	0.339992	0.166754	0.980587	0.994478	0.935832	0.536125	0.912207	0.171602	0.263311	0.651692	0	0	1	1	0	1	0.01431	0.982003	0.836227
DDA_maxlfq_top0	1	DDA	FragPipe	limma	2	0.652681	0.885917	0.548267	0.670582	0.726959	0.598816	0.25615	0.68138	0.835796	0.885805	1	0.985479	0	1	1	0	0	0	1	0.885803	0	0.40044
DDA_maxlfq_top3	1	DDA	FragPipe	limma	2	0.567408	0.879295	0.347222	0.679143	0.684726	0.55858	0.239227	0.628929	0.829228	0.918665	0.865435	0.985479	0.0412526	1	1	0	1	0	0	0.908898	0.00641483	0.515674
DDA_maxlfq_count	1	DDA	FragPipe	limma	2	0.980547	1	0.869336	0.264433	1	0.797011	0.998519	0.793261	1	1	0.694724	1	0.848501	0	1	0	1	0	1	0.685463	0.137919	0.453105
DDA_top0_top3	1	DDA	FragPipe	limma	2	0.313072	0	0.23588	0	0	0	0.0136957	0.128723	0	0.0068031	0.0186187	0	0.840266	1	1	1	0	0	0	0.885803	0	0
DDA_top0_count	1	DDA	FragPipe	limma	2	0.883046	0.604985	1	0.348851	0.058316	0.942299	0.993644	0.805834	0.500821	0.761269	0.362689	0.2091	0.210407	0	1	1	0	0	1	0.00439218	0.994476	0.645829
DDA_top3_count	1	DDA	FragPipe	limma	2	0.984092	0.612858	0.998111	0.357567	0.096663	1	0.994534	0.97996	0.502463	0.849981	0.199834	0.21394	0.179909	0	1	1	1	0	0	0.00779258	0.9902	0.487967
DDA_dlfq_maxlfq_top0	1	DDA	FragPipe	limma	3	0.458425	0.588543	0.228074	0.709327	0.41322	0.452808	0.41091	0.437629	0.556103	0.777529	0.569378	0.677315	0.472557	1	0	0	0	0	1	0.881411	0.00552388	0.710685
DDA_dlfq_maxlfq_top3	1	DDA	FragPipe	limma	3	0.428515	0.588126	0.200004	0.729078	0.395261	0.43945	0.376683	0.417711	0.555008	0.804132	0.443913	0.679251	0.521322	1	0	0	1	0	0	0.887929	0.0327869	0.767755
DDA_dlfq_maxlfq_count	1	DDA	FragPipe	limma	3	0.721801	0.82818	0.607895	0.895607	0.555592	0.649539	0.999342	0.576364	0.771757	0.926185	0.369195	0.749597	0.981461	0	0	0	1	0	1	0.01431	0.982003	0.797211
DDA_dlfq_top0_top3	1	DDA	FragPipe	limma	3	0.534298	0.0253576	0.208209	0.0831678	0.00457136	0.392446	0.181582	0.461479	0.0366721	0.404872	0.236846	0.0425944	0.856994	1	0	1	0	0	0	0.881411	0.00552388	0.709531
DDA_dlfq_top0_count	1	DDA	FragPipe	limma	3	0.80633	0.426838	0.696768	0.490302	0.0792496	0.837158	0.997384	0.791058	0.363437	0.751302	0.333723	0.177799	0.255558	0	0	1	0	0	1	0	1	0.65577
DDA_dlfq_top3_count	1	DDA	FragPipe	limma	3	0.829631	0.431253	0.735084	0.509241	0.0881509	0.856446	0.997474	0.846666	0.365079	0.796523	0.198827	0.181349	0.262795	0	0	1	1	0	0	0	1	1
DDA_maxlfq_top0_top3	1	DDA	FragPipe	limma	3	0.367395	0.588404	0.377123	0.685288	0.470562	0.385799	0.383007	0.479677	0.555008	0.603758	0.628018	0.656986	0.563347	1	1	0	0	0	0	0.885803	0	0.428897
DDA_maxlfq_top0_count	1	DDA	FragPipe	limma	3	0.853092	0.830301	0.805868	0.89624	0.595092	0.779375	0.999365	0.760158	0.778872	0.882358	0.685805	0.731526	0.503733	0	1	0	0	0	1	0.00439218	0.994476	0.422437
DDA_maxlfq_top3_count	1	DDA	FragPipe	limma	3	0.867085	0.830718	0.738223	0.899631	0.593796	0.785197	0.999221	0.800717	0.77723	0.922882	0.586664	0.73314	0.554715	0	1	0	1	0	0	0.00736752	0.990734	0.499764
DDA_top0_top3_count	1	DDA	FragPipe	limma	3	0.643205	0.405947	0.744664	0.463221	0.0516596	0.647433	0.997347	0.638172	0.334428	0.539351	0.193714	0.141013	0.821203	0	1	1	0	0	0	0.00439218	0.994476	0.269118
DDA_dlfq_maxlfq_top0_top3	1	DDA	FragPipe	limma	4	0.446692	0.447608	0.253353	0.719563	0.320903	0.417626	0.509198	0.449124	0.425698	0.647573	0.469539	0.514037	0.400432	1	0	0	0	0	0	0.881411	0.00552388	0.829767
DDA_dlfq_maxlfq_top0_count	1	DDA	FragPipe	limma	4	0.689571	0.668466	0.584651	0.971024	0.410788	0.67972	0.999803	0.641303	0.617542	0.834344	0.489525	0.584059	0.803404	0	0	0	0	0	1	0	1	0.769773
DDA_dlfq_maxlfq_top3_count	1	DDA	FragPipe	limma	4	0.691159	0.669569	0.570301	0.983307	0.4082	0.682658	0.999692	0.660364	0.617269	0.862431	0.39965	0.585834	0.830921	0	0	0	1	0	0	0	1	0.815754
DDA_dlfq_top0_top3_count	1	DDA	FragPipe	limma	4	0.702905	0.322349	0.596181	0.55699	0.0559079	0.683371	0.998699	0.684344	0.274904	0.623012	0.240777	0.135689	0.711456	0	0	1	0	0	0	0	1	0.678558
DDA_maxlfq_top0_top3_count	1	DDA	FragPipe	limma	4	0.627811	0.663842	0.666469	0.955773	0.427777	0.649451	0.999715	0.669681	0.611385	0.737087	0.52355	0.565666	0.349156	0	1	0	0	0	0	0.00439218	0.994476	0.520925
DDA_dlfq_maxlfq_top0_top3_count	1	DDA	FragPipe	limma	5	0.6315	0.554367	0.534191	1	0.324715	0.622565	1	0.620963	0.50936	0.740889	0.424608	0.477057	0.35686	0	0	0	0	0	0	0	1	0.794698
DDA_dlfq_maxlfq	1	DDA	FragPipe	ROTS	2	0	0.844361	0	0.663431	0.500021	0.17102	0.251656	0.034367	0.779146	0.86731	0.128096	0.985479	0.814769	1	0	0	1	0	1	1	0.00160371	0.709407
DDA_dlfq_top0	1	DDA	FragPipe	ROTS	2	0.657651	0.0353512	0.135956	0.0659278	0.0126786	0.588587	0	0.645512	0.0533662	0.585283	0.48325	0.0609874	0.291554	1	0	1	0	0	1	0.881411	0.00552388	0.736951
DDA_dlfq_top3	1	DDA	FragPipe	ROTS	2	0.63635	0.0407216	0.25279	0.0934257	0.00103549	0.588752	0.0276366	0.651383	0.0566502	0.641054	0.230352	0.0667958	0.312682	1	0	1	1	0	0	0.888212	0.0324305	0.792837
DDA_dlfq_count	1	DDA	FragPipe	ROTS	2	1	0.640179	0.95435	0.339992	0.166754	0.980587	0.994478	0.959956	0.536125	0.917732	0.672181	0.263311	0.347419	0	0	1	1	0	1	0.01431	0.982003	0.916544
DDA_maxlfq_top0	1	DDA	FragPipe	ROTS	2	0.652681	0.885917	0.548267	0.670582	0.726959	0.598816	0.25615	0.598758	0.835796	0.872282	0.985324	0.985479	0.651106	1	1	0	0	0	1	0.885803	0	0.442419
DDA_maxlfq_top3	1	DDA	FragPipe	ROTS	2	0.567408	0.879295	0.347222	0.679143	0.684726	0.55858	0.239227	0.579496	0.829228	0.909279	0.728671	0.985479	0.663786	1	1	0	1	0	0	0.908898	0.00641483	0.458521
DDA_maxlfq_count	1	DDA	FragPipe	ROTS	2	0.980547	1	0.869336	0.264433	1	0.797011	0.998519	0.795952	1	0.999177	0.984059	1	0.858988	0	1	0	1	0	1	0.685463	0.137919	0.375979
DDA_top0_top3	1	DDA	FragPipe	ROTS	2	0.313072	0	0.23588	0	0	0	0.0136957	0.11645	0	0	0	0	0.6919	1	1	1	0	0	0	0.885803	0	0.111718
DDA_top0_count	1	DDA	FragPipe	ROTS	2	0.883046	0.604985	1	0.348851	0.058316	0.942299	0.993644	0.804101	0.500821	0.759044	0.660411	0.2091	0.268254	0	1	1	0	0	1	0.00439218	0.994476	0.343581
DDA_top3_count	1	DDA	FragPipe	ROTS	2	0.984092	0.612858	0.998111	0.357567	0.096663	1	0.994534	1	0.502463	0.853169	0.628525	0.21394	0.294669	0	1	1	1	0	0	0.00779258	0.9902	0.422306
DDA_dlfq_maxlfq_top0	1	DDA	FragPipe	ROTS	3	0.458425	0.588543	0.228074	0.709327	0.41322	0.452808	0.41091	0.426212	0.556103	0.774958	0.532223	0.677315	0.946938	1	0	0	0	0	1	0.881411	0.00552388	0.79485
DDA_dlfq_maxlfq_top3	1	DDA	FragPipe	ROTS	3	0.428515	0.588126	0.200004	0.729078	0.395261	0.43945	0.376683	0.421749	0.555008	0.805881	0.362373	0.679251	0.948108	1	0	0	1	0	0	0.887929	0.0327869	0.587465
DDA_dlfq_maxlfq_count	1	DDA	FragPipe	ROTS	3	0.721801	0.82818	0.607895	0.895607	0.555592	0.649539	0.999342	0.596758	0.771757	0.928073	0.594779	0.749597	1	0	0	0	1	0	1	0.01431	0.982003	0.819298
DDA_dlfq_top0_top3	1	DDA	FragPipe	ROTS	3	0.534298	0.0253576	0.208209	0.0831678	0.00457136	0.392446	0.181582	0.471115	0.0366721	0.408779	0.237867	0.0425944	0.323521	1	0	1	0	0	0	0.881411	0.00552388	0.608244
DDA_dlfq_top0_count	1	DDA	FragPipe	ROTS	3	0.80633	0.426838	0.696768	0.490302	0.0792496	0.837158	0.997384	0.80319	0.363437	0.75402	0.605281	0.177799	0.330132	0	0	1	0	0	1	0	1	0.687371
DDA_dlfq_top3_count	1	DDA	FragPipe	ROTS	3	0.829631	0.431253	0.735084	0.509241	0.0881509	0.856446	0.997474	0.870446	0.365079	0.803985	0.510352	0.181349	0.340437	0	0	1	1	0	0	0	1	0.779982
DDA_maxlfq_top0_top3	1	DDA	FragPipe	ROTS	3	0.367395	0.588404	0.377123	0.685288	0.470562	0.385799	0.383007	0.431568	0.555008	0.593854	0.571332	0.656986	0.714791	1	1	0	0	0	0	0.885803	0	0.464266
DDA_maxlfq_top0_count	1	DDA	FragPipe	ROTS	3	0.853092	0.830301	0.805868	0.89624	0.595092	0.779375	0.999365	0.732937	0.778872	0.876834	0.876598	0.731526	0.865899	0	1	0	0	0	1	0.00439218	0.994476	0.56653
DDA_maxlfq_top3_count	1	DDA	FragPipe	ROTS	3	0.867085	0.830718	0.738223	0.899631	0.593796	0.785197	0.999221	0.791816	0.77723	0.920542	0.780418	0.73314	0.871199	0	1	0	1	0	0	0.00736752	0.990734	0.697295
DDA_top0_top3_count	1	DDA	FragPipe	ROTS	3	0.643205	0.405947	0.744664	0.463221	0.0516596	0.647433	0.997347	0.640184	0.334428	0.537404	0.429645	0.141013	0.799445	0	1	1	0	0	0	0.00439218	0.994476	0.22666
DDA_dlfq_maxlfq_top0_top3	1	DDA	FragPipe	ROTS	4	0.446692	0.447608	0.253353	0.719563	0.320903	0.417626	0.509198	0.437661	0.425698	0.645868	0.425949	0.514037	0.961341	1	0	0	0	0	0	0.881411	0.00552388	0.523619
DDA_dlfq_maxlfq_top0_count	1	DDA	FragPipe	ROTS	4	0.689571	0.668466	0.584651	0.971024	0.410788	0.67972	0.999803	0.639774	0.617542	0.833471	0.65222	0.584059	0.992648	0	0	0	0	0	1	0	1	0.7496
DDA_dlfq_maxlfq_top3_count	1	DDA	FragPipe	ROTS	4	0.691159	0.669569	0.570301	0.983307	0.4082	0.682658	0.999692	0.670192	0.617269	0.86462	0.561981	0.585834	0.993488	0	0	0	1	0	0	0	1	0.969843
DDA_dlfq_top0_top3_count	1	DDA	FragPipe	ROTS	4	0.702905	0.322349	0.596181	0.55699	0.0559079	0.683371	0.998699	0.696234	0.274904	0.626047	0.445786	0.135689	0.413077	0	0	1	0	0	0	0	1	0.662061
DDA_maxlfq_top0_top3_count	1	DDA	FragPipe	ROTS	4	0.627811	0.663842	0.666469	0.955773	0.427777	0.649451	0.999715	0.649126	0.611385	0.732159	0.664498	0.565666	0.712325	0	1	0	0	0	0	0.00439218	0.994476	0.461407
DDA_dlfq_maxlfq_top0_top3_count	1	DDA	FragPipe	ROTS	5	0.6315	0.554367	0.534191	1	0.324715	0.622565	1	0.618597	0.50936	0.740433	0.550087	0.477057	0.957222	0	0	0	0	0	0	0	1	0.652254
DDA_dlfq_maxlfq	2	DDA	FragPipe	limma	2	0	0.556704	0	0.717029	0.460162	0.210868	0.23736	0.167415	0.584087	0.726218	0.142163	1	0.339896	1	0	0	1	0	1	1	0.231462	0.554008
DDA_dlfq_top0	2	DDA	FragPipe	limma	2	0.588861	0.0639776	0.72625	0.18339	0.0638934	0.60854	0.0101068	0.469427	0.0863472	0.355881	0.306174	0.151964	0.721727	1	0	1	0	0	1	0.783873	0.0166321	0.760214
DDA_dlfq_top3	2	DDA	FragPipe	limma	2	0.597961	0.0773878	0.741664	0.235773	0.0546231	0.579122	0.0364872	0.460286	0.0813743	0.390501	0.177847	0.158403	0.758709	1	0	1	1	0	0	0.818222	0.994456	0.477472
DDA_dlfq_count	2	DDA	FragPipe	limma	2	1	0.456033	0.938127	0.383856	0.128705	1	0.998567	0.993492	0.435353	0.881782	0.18267	0.171925	0.0959645	0	0	1	1	0	1	0.00465984	0.754678	1
DDA_maxlfq_top0	2	DDA	FragPipe	limma	2	0.511449	0.651692	0.82947	0.712798	0.864401	0.459111	0.220718	0.445409	0.679024	0.711575	0.870891	0.99678	0.200703	1	1	0	0	0	1	0.784938	0	0.157704
DDA_maxlfq_top3	2	DDA	FragPipe	limma	2	0.42769	0.625103	0.776183	0.740744	0.842282	0.398675	0.222445	0.425709	0.665009	0.736224	0.666724	0.99678	0.216168	1	1	0	1	0	0	0.861448	0.319473	0.175829
DDA_maxlfq_count	2	DDA	FragPipe	limma	2	0.975154	1	0.929859	0.305903	1	0.746565	0.999425	0.875787	1	1	0.0547075	0.99678	0.627716	0	1	0	1	0	1	0.0518351	0.018018	0.181771
DDA_top0_top3	2	DDA	FragPipe	limma	2	0.185697	0	0.711957	0	0	0	0	0.0487424	0	0.00225842	0.00176279	0.0296201	0.685223	1	1	1	0	0	0	0.784849	0.00138596	0.580997
DDA_top0_count	2	DDA	FragPipe	limma	2	0.716774	0.350351	1	0.379532	0.0168033	0.883427	0.998251	0.839173	0.342224	0.827455	0.877603	0.0347714	0	0	1	1	0	0	1	0.00110948	0.810118	0.775702
DDA_top3_count	2	DDA	FragPipe	limma	2	0.911695	0.394707	0.999862	0.409351	0.0259808	0.964008	0.998439	0.909743	0.35443	0.854675	0.67809	0.053445	0.0252484	0	1	1	1	0	0	0.00284028	0.783091	0.811655
DDA_dlfq_maxlfq_top0	2	DDA	FragPipe	limma	3	0.388416	0.424124	0.518573	0.803233	0.462819	0.426173	0.428898	0.360751	0.449819	0.597891	0.439743	0.716248	0.790574	1	0	0	0	0	1	0.783873	0.0166321	0.572696
DDA_dlfq_maxlfq_top3	2	DDA	FragPipe	limma	3	0.362446	0.419732	0.505949	0.835438	0.452356	0.396222	0.414473	0.351137	0.44349	0.617648	0.328911	0.718395	0.811716	1	0	0	1	0	0	0.817867	1	0.528014
DDA_dlfq_maxlfq_count	2	DDA	FragPipe	limma	3	0.733939	0.670912	0.622662	0.875436	0.529622	0.652478	0.999763	0.678898	0.673146	0.869333	0.126513	0.722902	0.234898	0	0	0	1	0	1	0.00465984	0.754678	0.85864
DDA_dlfq_top0_top3	2	DDA	FragPipe	limma	3	0.444376	0.0471218	0.726624	0.21626	0.0395055	0.395887	0.240185	0.326152	0.0559072	0.249547	0.161928	0.113329	0.925946	1	0	1	0	0	0	0.783784	0.018018	0.580523
DDA_dlfq_top0_count	2	DDA	FragPipe	limma	3	0.762152	0.29012	0.888126	0.575184	0.0698005	0.830656	0.999361	0.767364	0.287975	0.688372	0.455482	0.119554	0.722923	0	0	1	0	0	1	4.4378e-05	0.82675	0.740614
DDA_dlfq_top3_count	2	DDA	FragPipe	limma	3	0.836057	0.309376	0.893218	0.613383	0.0697696	0.84771	0.999379	0.787841	0.290386	0.708986	0.346202	0.127924	0.754087	0	0	1	1	0	0	0.00106511	0.810811	0.730746
DDA_maxlfq_top0_top3	2	DDA	FragPipe	limma	3	0.251918	0.425598	0.772537	0.707779	0.568894	0.285929	0.405209	0.30662	0.448011	0.483352	0.513126	0.674394	0.714507	1	1	0	0	0	0	0.784849	0.00138596	0.108473
DDA_maxlfq_top0_count	2	DDA	FragPipe	limma	3	0.72659	0.667347	0.919776	0.88473	0.627068	0.696368	0.999748	0.720123	0.673749	0.846343	0.601067	0.676111	0.214516	0	1	0	0	0	1	0.00110948	0.810118	0.401068
DDA_maxlfq_top3_count	2	DDA	FragPipe	limma	3	0.784585	0.67327	0.901968	0.900502	0.622754	0.703083	0.999731	0.73708	0.673146	0.863633	0.466507	0.682335	0.260611	0	1	0	1	0	0	0.00284028	0.783091	0.179657
DDA_top0_top3_count	2	DDA	FragPipe	limma	3	0.60065	0.248353	0.903939	0.46833	0.0142614	0.615811	0.999294	0.59922	0.232218	0.561463	0.519152	0.0392788	0.696575	0	1	1	0	0	0	0.00106511	0.810811	0.944566
DDA_dlfq_maxlfq_top0_top3	2	DDA	FragPipe	limma	4	0.356288	0.329144	0.630921	0.769377	0.380894	0.376053	0.570208	0.336165	0.349307	0.48711	0.360927	0.555591	0.971078	1	0	0	0	0	0	0.783784	0.018018	0.696172
DDA_dlfq_maxlfq_top0_count	2	DDA	FragPipe	limma	4	0.652695	0.513126	0.737284	0.969318	0.422327	0.651419	0.999922	0.631784	0.521172	0.750485	0.405701	0.558704	0.782913	0	0	0	0	0	1	4.4378e-05	0.82675	0.829219
DDA_dlfq_maxlfq_top3_count	2	DDA	FragPipe	limma	4	0.683962	0.518322	0.730949	1	0.418625	0.649873	0.999907	0.638739	0.520042	0.7649	0.317034	0.562889	0.786735	0	0	0	1	0	0	0.00106511	0.810811	0.823519
DDA_dlfq_top0_top3_count	2	DDA	FragPipe	limma	4	0.660907	0.223743	0.852977	0.583919	0.0483343	0.672516	0.999719	0.620144	0.216621	0.552092	0.370691	0.100021	0.971331	0	0	1	0	0	0	0	0.827443	0.64237
DDA_maxlfq_top0_top3_count	2	DDA	FragPipe	limma	4	0.588204	0.503642	0.874555	0.909424	0.458245	0.575298	0.999901	0.590761	0.506781	0.688698	0.524963	0.51803	0.66727	0	1	0	0	0	0	0.00106511	0.810811	0.420367
DDA_dlfq_maxlfq_top0_top3_count	2	DDA	FragPipe	limma	5	0.58907	0.417595	0.765337	0.981446	0.345685	0.585032	1	0.563519	0.422785	0.648657	0.395863	0.459047	1	0	0	0	0	0	0	0	0.827443	0.89089
DDA_dlfq_maxlfq	2	DDA	FragPipe	ROTS	2	0	0.556704	0	0.717029	0.460162	0.210868	0.23736	0	0.588156	0.590108	0.114849	0.976819	0.512785	1	0	0	1	0	1	1	0.231462	0.510503
DDA_dlfq_top0	2	DDA	FragPipe	ROTS	2	0.588861	0.0639776	0.72625	0.18339	0.0638934	0.60854	0.0101068	0.424273	0.0886076	0.318716	0.178694	0.124276	0.742295	1	0	1	0	0	1	0.783873	0.0166321	0.77884
DDA_dlfq_top3	2	DDA	FragPipe	ROTS	2	0.597961	0.0773878	0.741664	0.235773	0.0546231	0.579122	0.0364872	0.430435	0.0831826	0.352633	0.0717474	0.130715	0.713735	1	0	1	1	0	0	0.818222	0.994456	0.661589
DDA_dlfq_count	2	DDA	FragPipe	ROTS	2	1	0.456033	0.938127	0.383856	0.128705	1	0.998567	1	0.41953	0.864638	0.533773	0.146813	0.298766	0	0	1	1	0	1	0.00465984	0.754678	0.954847
DDA_maxlfq_top0	2	DDA	FragPipe	ROTS	2	0.511449	0.651692	0.82947	0.712798	0.864401	0.459111	0.220718	0.433153	0.683544	0.671403	0.531848	0.972312	0.552869	1	1	0	0	0	1	0.784938	0	0.142872
DDA_maxlfq_top3	2	DDA	FragPipe	ROTS	2	0.42769	0.625103	0.776183	0.740744	0.842282	0.398675	0.222445	0.438871	0.669078	0.696987	0.364646	0.972312	0.619573	1	1	0	1	0	0	0.861448	0.319473	0
DDA_maxlfq_count	2	DDA	FragPipe	ROTS	2	0.975154	1	0.929859	0.305903	1	0.746565	0.999425	0.849523	0.982821	0.977987	0.271824	0.972312	0.586621	0	1	0	1	0	1	0.0518351	0.018018	0.0927129
DDA_top0_top3	2	DDA	FragPipe	ROTS	2	0.185697	0	0.711957	0	0	0	0	0.0799997	0.00135624	0	0	0	0.745059	1	1	1	0	0	0	0.784849	0.00138596	0.283303
DDA_top0_count	2	DDA	FragPipe	ROTS	2	0.716774	0.350351	1	0.379532	0.0168033	0.883427	0.998251	0.844098	0.323237	0.828139	1	0.00579525	0.218829	0	1	1	0	0	1	0.00110948	0.810118	0.829165
DDA_top3_count	2	DDA	FragPipe	ROTS	2	0.911695	0.394707	0.999862	0.409351	0.0259808	0.964008	0.998439	0.917609	0.335895	0.854741	0.838979	0.0251127	0.244279	0	1	1	1	0	0	0.00284028	0.783091	0.841249
DDA_dlfq_maxlfq_top0	2	DDA	FragPipe	ROTS	3	0.388416	0.424124	0.518573	0.803233	0.462819	0.426173	0.428898	0.285809	0.453436	0.526742	0.27513	0.691135	0.472156	1	0	0	0	0	1	0.783873	0.0166321	0.616612
DDA_dlfq_maxlfq_top3	2	DDA	FragPipe	ROTS	3	0.362446	0.419732	0.505949	0.835438	0.452356	0.396222	0.414473	0.289768	0.446805	0.546576	0.183748	0.693282	0.513126	1	0	0	1	0	0	0.817867	1	0.590822
DDA_dlfq_maxlfq_count	2	DDA	FragPipe	ROTS	3	0.733939	0.670912	0.622662	0.875436	0.529622	0.652478	0.999763	0.616508	0.663502	0.810911	0.306815	0.698648	0.59119	0	0	0	1	0	1	0.00465984	0.754678	0.637233
DDA_dlfq_top0_top3	2	DDA	FragPipe	ROTS	3	0.444376	0.0471218	0.726624	0.21626	0.0395055	0.395887	0.240185	0.311569	0.0577155	0.223783	0.0834806	0.0849968	0.93717	1	0	1	0	0	0	0.783784	0.018018	0.497356
DDA_dlfq_top0_count	2	DDA	FragPipe	ROTS	3	0.762152	0.29012	0.888126	0.575184	0.0698005	0.830656	0.999361	0.756124	0.277125	0.670498	0.570822	0.0922945	0.842716	0	0	1	0	0	1	4.4378e-05	0.82675	0.832498
DDA_dlfq_top3_count	2	DDA	FragPipe	ROTS	3	0.836057	0.309376	0.893218	0.613383	0.0697696	0.84771	0.999379	0.782681	0.279536	0.690671	0.4815	0.10088	0.825652	0	0	1	1	0	0	0.00106511	0.810811	0.984691
DDA_maxlfq_top0_top3	2	DDA	FragPipe	ROTS	3	0.251918	0.425598	0.772537	0.707779	0.568894	0.285929	0.405209	0.317341	0.451326	0.45613	0.298831	0.648208	0.510249	1	1	0	0	0	0	0.784849	0.00138596	0.240234
DDA_maxlfq_top0_count	2	DDA	FragPipe	ROTS	3	0.72659	0.667347	0.919776	0.88473	0.627068	0.696368	0.999748	0.708925	0.663201	0.825843	0.601224	0.65014	0.570147	0	1	0	0	0	1	0.00110948	0.810118	0.225073
DDA_maxlfq_top3_count	2	DDA	FragPipe	ROTS	3	0.784585	0.67327	0.901968	0.900502	0.622754	0.703083	0.999731	0.735334	0.662598	0.843238	0.491817	0.656579	0.620314	0	1	0	1	0	0	0.00284028	0.783091	0.159835
DDA_top0_top3_count	2	DDA	FragPipe	ROTS	3	0.60065	0.248353	0.903939	0.46833	0.0142614	0.615811	0.999294	0.613902	0.220163	0.56096	0.612993	0.0103027	0.8279	0	1	1	0	0	0	0.00106511	0.810811	0.971326
DDA_dlfq_maxlfq_top0_top3	2	DDA	FragPipe	ROTS	4	0.356288	0.329144	0.630921	0.769377	0.380894	0.376053	0.570208	0.301122	0.352321	0.438308	0.210297	0.529405	0.457772	1	0	0	0	0	0	0.783784	0.018018	0.59242
DDA_dlfq_maxlfq_top0_count	2	DDA	FragPipe	ROTS	4	0.652695	0.513126	0.737284	0.969318	0.422327	0.651419	0.999922	0.591841	0.514316	0.708499	0.438498	0.533054	0.460424	0	0	0	0	0	1	4.4378e-05	0.82675	0.6294
DDA_dlfq_maxlfq_top3_count	2	DDA	FragPipe	ROTS	4	0.683962	0.518322	0.730949	1	0.418625	0.649873	0.999907	0.606073	0.51311	0.722849	0.36597	0.537347	0.476331	0	0	0	1	0	0	0.00106511	0.810811	0.7203
DDA_dlfq_top0_top3_count	2	DDA	FragPipe	ROTS	4	0.660907	0.223743	0.852977	0.583919	0.0483343	0.672516	0.999719	0.616069	0.208635	0.536478	0.437199	0.0721185	0.991766	0	0	1	0	0	0	0	0.827443	0.931832
DDA_maxlfq_top0_top3_count	2	DDA	FragPipe	ROTS	4	0.588204	0.503642	0.874555	0.909424	0.458245	0.575298	0.999901	0.593876	0.499322	0.671543	0.501216	0.491307	0.467401	0	1	0	0	0	0	0.00106511	0.810811	0.350573
DDA_dlfq_maxlfq_top0_top3_count	2	DDA	FragPipe	ROTS	5	0.58907	0.417595	0.765337	0.981446	0.345685	0.585032	1	0.541796	0.417541	0.615535	0.390636	0.432647	0.520833	0	0	0	0	0	0	0	0.827443	0.745206
DDA_dlfq_maxlfq	3	DDA	FragPipe	limma	2	0	0.951386	0.264365	0.579176	0.641016	0.25078	0.0916648	0.155407	0.944444	0.885089	0.18793	0.981586	0.730643	1	0	0	1	0	1	0.518394	0.0562355	0.42424
DDA_dlfq_top0	3	DDA	FragPipe	limma	2	0.545192	0.0493338	0.13573	0.0977335	0.0362901	0.536775	0	0.576895	0.0597884	0.583317	0.328039	0.058312	0.415666	1	0	1	0	0	1	0.260884	0.0721138	0.544413
DDA_dlfq_top3	3	DDA	FragPipe	limma	2	0.570902	0.0346897	0.480548	0.0704593	0	0.536293	0.0401292	0.621436	0.04709	0.620305	0.248932	0.056266	0.459024	1	0	1	1	0	0	0.316145	0.0648363	0.702288
DDA_dlfq_count	3	DDA	FragPipe	limma	2	1	0.370704	0.985354	0.510525	0.452856	0.99011	0.995886	0.956033	0.374603	0.927526	0.0784737	0.337596	0.571276	0	0	1	1	0	1	0.0616868	0.996692	0.71867
DDA_maxlfq_top0	3	DDA	FragPipe	limma	2	0.410209	1	0.572585	0.571332	0.867548	0.52188	0.0851542	0.584009	1	0.862773	0.945361	0.974936	0.384484	1	1	0	0	0	1	0.295904	0	0.338166
DDA_maxlfq_top3	3	DDA	FragPipe	limma	2	0.454576	0.994398	0	0.579783	0.743072	0.527761	0.106045	0.638048	0.995767	0.891892	0.890806	0.976982	0.364097	1	1	0	1	0	0	0.333012	0.0301025	0.220822
DDA_maxlfq_count	3	DDA	FragPipe	limma	2	0.928045	0.871404	0.872039	0.518175	1	0.858592	1	0.854748	0.788889	1	0.294275	1	0.581897	0	1	0	1	0	1	1	0.386702	0.155048
DDA_top0_top3	3	DDA	FragPipe	limma	2	0.170026	0	0.571199	0	0.0409685	0	0.0276688	0.202521	0	0.130673	0.00138842	0	0.919807	1	1	1	0	0	0	0.260884	0.0721138	0.409058
DDA_top0_count	3	DDA	FragPipe	limma	2	0.856093	0.32201	0.999869	0.502802	0.256173	0.936766	0.995209	0.887656	0.353968	0.810097	0.452846	0.294118	0.76159	0	1	1	0	0	1	0.0345382	0.538207	0.397178
DDA_top3_count	3	DDA	FragPipe	limma	2	0.983581	0.332733	1	0.513159	0.37889	1	0.995721	1	0.355026	0.861749	0.415884	0.298721	0.733057	0	1	1	1	0	0	0.0388755	0.635792	0.447164
DDA_dlfq_maxlfq_top0	3	DDA	FragPipe	limma	3	0.338943	0.666907	0.324227	0.642683	0.514952	0.436478	0.18048	0.43877	0.668078	0.77706	0.48711	0.671611	0.275169	1	0	0	0	0	1	0.260884	0.0721138	0.593897
DDA_dlfq_maxlfq_top3	3	DDA	FragPipe	limma	3	0.356147	0.660158	0.248304	0.634036	0.461363	0.438278	0.204937	0.47163	0.662434	0.799095	0.442556	0.671611	0.303789	1	0	0	1	0	0	0.306988	0.0836917	0.648168
DDA_dlfq_maxlfq_count	3	DDA	FragPipe	limma	3	0.701339	0.731165	0.707253	0.939297	0.697957	0.699828	0.999202	0.655396	0.702646	0.937538	0.186893	0.773061	0.720641	0	0	0	1	0	1	0.0600803	1	0.817864
DDA_dlfq_top0_top3	3	DDA	FragPipe	limma	3	0.423019	0.0280078	0.395826	0.105389	0.0257529	0.357689	0.156015	0.466951	0.0356261	0.444765	0.192787	0.0381926	0.640134	1	0	1	0	0	0	0.258313	0.0774065	0.57834
DDA_dlfq_top0_count	3	DDA	FragPipe	limma	3	0.772213	0.247349	0.706985	0.588536	0.24844	0.821217	0.993682	0.806861	0.262787	0.773646	0.286453	0.230009	0.593594	0	0	1	0	0	1	0.00208835	0.605028	0.432158
DDA_dlfq_top3_count	3	DDA	FragPipe	limma	3	0.819272	0.246042	0.821967	0.579102	0.277249	0.842134	0.993873	0.859156	0.258907	0.803193	0.247763	0.230861	0.620148	0	0	1	1	0	0	0.0268273	0.660602	1
DDA_maxlfq_top0_top3	3	DDA	FragPipe	limma	3	0.233345	0.664799	0.381261	0.590578	0.55053	0.34988	0.203747	0.474859	0.665256	0.628446	0.612518	0.650639	0.930612	1	1	0	0	0	0	0.260884	0.0721138	0.246469
DDA_maxlfq_top0_count	3	DDA	FragPipe	limma	3	0.75181	0.731138	0.814831	0.926694	0.707907	0.772413	0.999075	0.775471	0.714286	0.890957	0.564161	0.756351	0.66974	0	1	0	0	0	1	0.0345382	0.538207	0.350651
DDA_maxlfq_top3_count	3	DDA	FragPipe	limma	3	0.809416	0.732845	0.624013	0.934665	0.707321	0.795451	0.998868	0.830932	0.713228	0.91788	0.533655	0.758568	0.628012	0	1	0	1	0	0	0.0372691	0.6391	0.116851
DDA_top0_top3_count	3	DDA	FragPipe	limma	3	0.603451	0.218248	0.857023	0.535786	0.225344	0.645589	0.993367	0.696726	0.236332	0.60084	0.290039	0.197613	0.987377	0	1	1	0	0	0	0.00257027	0.604036	0.459762
DDA_dlfq_maxlfq_top0_top3	3	DDA	FragPipe	limma	4	0.335378	0.504968	0.337404	0.636518	0.388149	0.395581	0.296351	0.463053	0.507848	0.662341	0.433743	0.508014	0.623169	1	0	0	0	0	0	0.258313	0.0774065	0.605046
DDA_dlfq_maxlfq_top0_count	3	DDA	FragPipe	limma	4	0.630162	0.59414	0.638324	1	0.542314	0.682484	0.997595	0.669125	0.586949	0.8448	0.381154	0.607758	0.352239	0	0	0	0	0	1	0.00208835	0.605028	0.939306
DDA_dlfq_maxlfq_top3_count	3	DDA	FragPipe	limma	4	0.659122	0.592553	0.600384	0.996997	0.535972	0.693923	0.997265	0.704279	0.584303	0.864427	0.352717	0.608525	0.359987	0	0	0	1	0	0	0.0258635	0.662587	0.694136
DDA_dlfq_top0_top3_count	3	DDA	FragPipe	limma	4	0.65223	0.184912	0.69545	0.59665	0.194196	0.666657	0.989838	0.707424	0.198413	0.655611	0.25426	0.174169	0.710948	0	0	1	0	0	0	0	0.609328	0.650506
DDA_maxlfq_top0_top3_count	3	DDA	FragPipe	limma	4	0.559478	0.586758	0.669282	0.965194	0.547775	0.640833	0.997077	0.694497	0.582275	0.759531	0.500093	0.590793	1	0	1	0	0	0	0	0.00257027	0.604036	0.232679
DDA_dlfq_maxlfq_top0_top3_count	3	DDA	FragPipe	limma	5	0.565824	0.492666	0.588169	0.997457	0.441681	0.615896	0.994323	0.647675	0.491958	0.757342	0.384393	0.497852	0.744076	0	0	0	0	0	0	0	0.609328	0.882879
DDA_dlfq_maxlfq	3	DDA	FragPipe	ROTS	2	0	0.951386	0.264365	0.579176	0.641016	0.25078	0.0916648	0	0.944444	0.7834	0.241855	0.981586	0.337324	1	0	0	1	0	1	0.518394	0.0562355	0.415527
DDA_dlfq_top0	3	DDA	FragPipe	ROTS	2	0.545192	0.0493338	0.13573	0.0977335	0.0362901	0.536775	0	0.364951	0.0597884	0.474049	0.308495	0.058312	0.487955	1	0	1	0	0	1	0.260884	0.0721138	0.832722
DDA_dlfq_top3	3	DDA	FragPipe	ROTS	2	0.570902	0.0346897	0.480548	0.0704593	0	0.536293	0.0401292	0.359464	0.04709	0.499753	0.235145	0.056266	0.499885	1	0	1	1	0	0	0.316145	0.0648363	0.561645
DDA_dlfq_count	3	DDA	FragPipe	ROTS	2	1	0.370704	0.985354	0.510525	0.452856	0.99011	0.995886	0.928396	0.374603	0.895604	0.407813	0.337596	0.377746	0	0	1	1	0	1	0.0616868	0.996692	0.893386
DDA_maxlfq_top0	3	DDA	FragPipe	ROTS	2	0.410209	1	0.572585	0.571332	0.867548	0.52188	0.0851542	0.392922	1	0.7802	0.958258	0.974936	0.48992	1	1	0	0	0	1	0.295904	0	0.282424
DDA_maxlfq_top3	3	DDA	FragPipe	ROTS	2	0.454576	0.994398	0	0.579783	0.743072	0.527761	0.106045	0.394933	0.995767	0.799543	0.926939	0.976982	0.486338	1	1	0	1	0	0	0.333012	0.0301025	0.104861
DDA_maxlfq_count	3	DDA	FragPipe	ROTS	2	0.928045	0.871404	0.872039	0.518175	1	0.858592	1	0.82913	0.788889	0.978855	0.277586	1	0.7466	0	1	0	1	0	1	1	0.386702	0.140647
DDA_top0_top3	3	DDA	FragPipe	ROTS	2	0.170026	0	0.571199	0	0.0409685	0	0.0276688	0.0148087	0	0	0	0	0.645448	1	1	1	0	0	0	0.260884	0.0721138	0.261274
DDA_top0_count	3	DDA	FragPipe	ROTS	2	0.856093	0.32201	0.999869	0.502802	0.256173	0.936766	0.995209	0.887421	0.353968	0.791937	0.932145	0.294118	0	0	1	1	0	0	1	0.0345382	0.538207	0.360718
DDA_top3_count	3	DDA	FragPipe	ROTS	2	0.983581	0.332733	1	0.513159	0.37889	1	0.995721	0.981826	0.355026	0.836507	1	0.298721	0.0160688	0	1	1	1	0	0	0.0388755	0.635792	0.518529
DDA_dlfq_maxlfq_top0	3	DDA	FragPipe	ROTS	3	0.338943	0.666907	0.324227	0.642683	0.514952	0.436478	0.18048	0.252624	0.668078	0.679216	0.502869	0.671611	0.459168	1	0	0	0	0	1	0.260884	0.0721138	0.635844
DDA_dlfq_maxlfq_top3	3	DDA	FragPipe	ROTS	3	0.356147	0.660158	0.248304	0.634036	0.461363	0.438278	0.204937	0.251465	0.662434	0.694232	0.46798	0.671611	0.455514	1	0	0	1	0	0	0.306988	0.0836917	0.529051
DDA_dlfq_maxlfq_count	3	DDA	FragPipe	ROTS	3	0.701339	0.731165	0.707253	0.939297	0.697957	0.699828	0.999202	0.585842	0.702646	0.885953	0.309085	0.773061	0.696529	0	0	0	1	0	1	0.0600803	1	0.981426
DDA_dlfq_top0_top3	3	DDA	FragPipe	ROTS	3	0.423019	0.0280078	0.395826	0.105389	0.0257529	0.357689	0.156015	0.246408	0.0356261	0.324601	0.181213	0.0381926	0.66199	1	0	1	0	0	0	0.258313	0.0774065	0.759276
DDA_dlfq_top0_count	3	DDA	FragPipe	ROTS	3	0.772213	0.247349	0.706985	0.588536	0.24844	0.821217	0.993682	0.726923	0.262787	0.72053	0.549485	0.230009	0.214833	0	0	1	0	0	1	0.00208835	0.605028	0.780254
DDA_dlfq_top3_count	3	DDA	FragPipe	ROTS	3	0.819272	0.246042	0.821967	0.579102	0.277249	0.842134	0.993873	0.756562	0.258907	0.743955	0.547653	0.230861	0.215269	0	0	1	1	0	0	0.0268273	0.660602	0.56188
DDA_maxlfq_top0_top3	3	DDA	FragPipe	ROTS	3	0.233345	0.664799	0.381261	0.590578	0.55053	0.34988	0.203747	0.267554	0.665256	0.526581	0.628399	0.650639	0.700105	1	1	0	0	0	0	0.260884	0.0721138	0.495313
DDA_maxlfq_top0_count	3	DDA	FragPipe	ROTS	3	0.75181	0.731138	0.814831	0.926694	0.707907	0.772413	0.999075	0.703157	0.714286	0.850331	0.722663	0.756351	0.389932	0	1	0	0	0	1	0.0345382	0.538207	0.0535073
DDA_maxlfq_top3_count	3	DDA	FragPipe	ROTS	3	0.809416	0.732845	0.624013	0.934665	0.707321	0.795451	0.998868	0.735296	0.713228	0.871635	0.734841	0.758568	0.44005	0	1	0	1	0	0	0.0372691	0.6391	0
DDA_top0_top3_count	3	DDA	FragPipe	ROTS	3	0.603451	0.218248	0.857023	0.535786	0.225344	0.645589	0.993367	0.628018	0.236332	0.542815	0.644048	0.197613	0.648719	0	1	1	0	0	0	0.00257027	0.604036	0.671496
DDA_dlfq_maxlfq_top0_top3	3	DDA	FragPipe	ROTS	4	0.335378	0.504968	0.337404	0.636518	0.388149	0.395581	0.296351	0.254513	0.507848	0.556158	0.445115	0.508014	0.670207	1	0	0	0	0	0	0.258313	0.0774065	0.798793
DDA_dlfq_maxlfq_top0_count	3	DDA	FragPipe	ROTS	4	0.630162	0.59414	0.638324	1	0.542314	0.682484	0.997595	0.567136	0.586949	0.784007	0.521025	0.607758	0.310997	0	0	0	0	0	1	0.00208835	0.605028	0.831416
DDA_dlfq_maxlfq_top3_count	3	DDA	FragPipe	ROTS	4	0.659122	0.592553	0.600384	0.996997	0.535972	0.693923	0.997265	0.582291	0.584303	0.798944	0.51489	0.608525	0.34027	0	0	0	1	0	0	0.0258635	0.662587	0.638188
DDA_dlfq_top0_top3_count	3	DDA	FragPipe	ROTS	4	0.65223	0.184912	0.69545	0.59665	0.194196	0.666657	0.989838	0.589478	0.198413	0.582975	0.4806	0.174169	0.642826	0	0	1	0	0	0	0	0.609328	0.916367
DDA_maxlfq_top0_top3_count	3	DDA	FragPipe	ROTS	4	0.559478	0.586758	0.669282	0.965194	0.547775	0.640833	0.997077	0.583507	0.582275	0.69784	0.682488	0.590793	0.639669	0	1	0	0	0	0	0.00257027	0.604036	0.573949
DDA_dlfq_maxlfq_top0_top3_count	3	DDA	FragPipe	ROTS	5	0.565824	0.492666	0.588169	0.997457	0.441681	0.615896	0.994323	0.515385	0.491958	0.683985	0.528824	0.497852	0.598916	0	0	0	0	0	0	0	0.609328	0.845322
DDA_dlfq_maxlfq	4	DDA	FragPipe	limma	2	0	0.993727	0.413644	0.576102	0.675194	0.334222	0.0996219	0.00292226	0.901549	0.64163	0.539943	0.736937	0.600536	1	0	0	1	0	1	0.105133	0	0.26226
DDA_dlfq_top0	4	DDA	FragPipe	limma	2	0.483818	0.0169972	0	0.0370751	0	0.307978	0	0.323279	0.0132743	0.450401	0.0883988	0.00630632	0.654801	1	0	1	0	0	1	0.0817699	0.0402439	0.508694
DDA_dlfq_top3	4	DDA	FragPipe	limma	2	0.484656	0	0.343839	0	0.0332414	0.319436	0.0595386	0.330873	0	0.492036	0.0220751	0	0.657188	1	0	1	1	0	0	0.0902655	0.00670733	0.531494
DDA_dlfq_count	4	DDA	FragPipe	limma	2	0.985045	0.941926	0.990376	0.594699	0.914567	0.985724	0.984049	0.957775	1	0.995392	0.0778561	0.803604	0.539494	0	0	1	1	0	1	0.00955752	0.164634	0.716585
DDA_maxlfq_top0	4	DDA	FragPipe	limma	2	0.470494	0.992716	0.504232	0.567816	0.724847	0.588771	0.10468	0.375783	0.901549	0.761354	1	0.736937	0.791101	1	1	0	0	0	1	0.106903	0	0.506109
DDA_maxlfq_top3	4	DDA	FragPipe	limma	2	0.485855	1	0.0665469	0.58103	0.657787	0.629878	0.146634	0.389815	0.903761	0.798759	0.722126	0.736937	0.80303	1	1	0	1	0	0	0.0941593	0	0.382437
DDA_maxlfq_count	4	DDA	FragPipe	limma	2	0.973779	0.814043	0.717217	0.537911	1	0.960885	1	0.893007	0.576327	0.86222	0.625235	1	0.33376	0	1	0	1	0	1	1	1	0.452814
DDA_top0_top3	4	DDA	FragPipe	limma	2	0.201561	0.00870092	0.389527	0.0265128	0.0574574	0	0.055148	0.0768485	0.00884956	0.112952	0.00471863	0.0036036	0.64871	1	1	1	0	0	0	0.0835398	0.0182927	0.523927
DDA_top0_count	4	DDA	FragPipe	limma	2	1	0.923917	1	0.595846	0.763091	0.979596	0.982489	0.940172	0.995575	0.968866	0.133508	0.801802	0.384837	0	1	1	0	0	1	0.0261947	0.139024	0.321724
DDA_top3_count	4	DDA	FragPipe	limma	2	0.993527	0.934035	0.991813	0.613105	0.968987	1	0.98604	0.995801	1	1	0.0750787	0.802703	0.383033	0	1	1	1	0	0	0.0109734	0.143293	0.463589
DDA_dlfq_maxlfq_top0	4	DDA	FragPipe	limma	3	0.301726	0.667813	0.305959	0.589582	0.46668	0.410324	0.220353	0.233995	0.605457	0.617795	0.54278	0.493393	0.709594	1	0	0	0	0	1	0.0817699	0.0402439	0.365926
DDA_dlfq_maxlfq_top3	4	DDA	FragPipe	limma	3	0.306167	0.664576	0.274677	0.575952	0.455407	0.427846	0.264854	0.241203	0.60177	0.644142	0.428048	0.491291	0.706248	1	0	0	1	0	0	0.0902655	0.00670733	0.577432
DDA_dlfq_maxlfq_count	4	DDA	FragPipe	limma	3	0.589279	0.916565	0.707079	0.995692	0.863254	0.760277	0.996391	0.617901	0.825959	0.833081	0.414345	0.846847	0.868725	0	0	0	1	0	1	0.00955752	0.164634	0.670362
DDA_dlfq_top0_top3	4	DDA	FragPipe	limma	3	0.389563	0.00856603	0.244455	0.0490163	0.0302329	0.209138	0.168945	0.243667	0.00737463	0.351796	0.0383975	0.0033033	0.54196	1	0	1	0	0	0	0.080708	0.0231707	0.701078
DDA_dlfq_top0_count	4	DDA	FragPipe	limma	3	0.69192	0.627614	0.663459	0.617389	0.559219	0.757766	0.970794	0.740408	0.669617	0.804886	0.099921	0.537237	0.89828	0	0	1	0	0	1	0.00106194	0.179268	0.958289
DDA_dlfq_top3_count	4	DDA	FragPipe	limma	3	0.68888	0.62532	0.775343	0.599071	0.638932	0.768387	0.972135	0.761483	0.666667	0.829143	0.0583366	0.535435	0.897368	0	0	1	1	0	0	0.00743363	0.14939	0.769463
DDA_maxlfq_top0_top3	4	DDA	FragPipe	limma	3	0.277302	0.667139	0.320102	0.592643	0.48003	0.406216	0.267751	0.280815	0.60472	0.557688	0.575615	0.492492	0.895517	1	1	0	0	0	0	0.0835398	0.0182927	0.539601
DDA_maxlfq_top0_count	4	DDA	FragPipe	limma	3	0.778546	0.910225	0.740483	0.986897	0.829312	0.843084	0.996652	0.736321	0.824484	0.864147	0.586248	0.846246	0.621027	0	1	0	0	0	1	0.0261947	0.139024	0.654198
DDA_maxlfq_top3_count	4	DDA	FragPipe	limma	3	0.778169	0.916026	0.591859	1	0.875591	0.863588	0.995652	0.759541	0.826696	0.886993	0.474147	0.846547	0.634037	0	1	0	1	0	0	0.0109734	0.143293	0.625654
DDA_top0_top3_count	4	DDA	FragPipe	limma	3	0.514989	0.622218	0.79378	0.616461	0.596512	0.659865	0.97225	0.67094	0.668142	0.69394	0.0711018	0.536036	0.570569	0	1	1	0	0	0	0.00283185	0.157317	0.735947
DDA_dlfq_maxlfq_top0_top3	4	DDA	FragPipe	limma	4	0.318503	0.502023	0.286298	0.558019	0.358088	0.363381	0.363351	0.24992	0.45483	0.542855	0.39621	0.37012	0.62531	1	0	0	0	0	0	0.080708	0.0231707	0.685413
DDA_dlfq_maxlfq_top0_count	4	DDA	FragPipe	limma	4	0.541436	0.780554	0.604245	0.957418	0.679616	0.692863	0.989101	0.582156	0.731379	0.779977	0.410823	0.680931	0.906312	0	0	0	0	0	1	0.00106194	0.179268	0.774028
DDA_dlfq_maxlfq_top3_count	4	DDA	FragPipe	limma	4	0.541609	0.780622	0.587239	0.945463	0.708296	0.705024	0.986932	0.595032	0.730273	0.79834	0.343719	0.68003	0.904532	0	0	0	1	0	0	0.00743363	0.14939	0.901909
DDA_dlfq_top0_top3_count	4	DDA	FragPipe	limma	4	0.57078	0.470929	0.619259	0.56879	0.456224	0.598789	0.94355	0.604125	0.50295	0.669941	0.0669392	0.403003	0.771893	0	0	1	0	0	0	0	0.162195	0.827508
DDA_maxlfq_top0_top3_count	4	DDA	FragPipe	limma	4	0.495551	0.778902	0.611556	0.954961	0.695361	0.693188	0.987437	0.611904	0.73101	0.750692	0.426778	0.68033	0.824355	0	1	0	0	0	0	0.00283185	0.157317	0.751472
DDA_dlfq_maxlfq_top0_top3_count	4	DDA	FragPipe	limma	5	0.493241	0.662606	0.541719	0.88212	0.579517	0.610649	0.969636	0.528628	0.630088	0.708361	0.328894	0.562883	0.662589	0	0	0	0	0	0	0	0.162195	0.874821
DDA_dlfq_maxlfq	4	DDA	FragPipe	ROTS	2	0	0.993727	0.413644	0.576102	0.675194	0.334222	0.0996219	0	0.901549	0.51744	0.477622	0.736937	0.215516	1	0	0	1	0	1	0.105133	0	0.244882
DDA_dlfq_top0	4	DDA	FragPipe	ROTS	2	0.483818	0.0169972	0	0.0370751	0	0.307978	0	0.331646	0.0132743	0.378589	0.0687086	0.00630632	0.498584	1	0	1	0	0	1	0.0817699	0.0402439	0.659606
DDA_dlfq_top3	4	DDA	FragPipe	ROTS	2	0.484656	0	0.343839	0	0.0332414	0.319436	0.0595386	0.339281	0	0.41759	0.0183605	0	0.495815	1	0	1	1	0	0	0.0902655	0.00670733	0.553513
DDA_dlfq_count	4	DDA	FragPipe	ROTS	2	0.985045	0.941926	0.990376	0.594699	0.914567	0.985724	0.984049	0.958638	1	0.972304	0.0651115	0.803604	0	0	0	1	1	0	1	0.00955752	0.164634	0.364836
DDA_maxlfq_top0	4	DDA	FragPipe	ROTS	2	0.470494	0.992716	0.504232	0.567816	0.724847	0.588771	0.10468	0.383334	0.901549	0.704977	0.842917	0.736937	0.706926	1	1	0	0	0	1	0.106903	0	0.487465
DDA_maxlfq_top3	4	DDA	FragPipe	ROTS	2	0.485855	1	0.0665469	0.58103	0.657787	0.629878	0.146634	0.398864	0.903761	0.744635	0.610764	0.736937	0.719858	1	1	0	1	0	0	0.0941593	0	0.313782
DDA_maxlfq_count	4	DDA	FragPipe	ROTS	2	0.973779	0.814043	0.717217	0.537911	1	0.960885	1	0.891084	0.576327	0.826534	0.516096	1	0.665483	0	1	0	1	0	1	1	1	0.469998
DDA_top0_top3	4	DDA	FragPipe	ROTS	2	0.201561	0.00870092	0.389527	0.0265128	0.0574574	0	0.055148	0.080436	0.00884956	0	0	0.0036036	0.613516	1	1	1	0	0	0	0.0835398	0.0182927	0.542676
DDA_top0_count	4	DDA	FragPipe	ROTS	2	1	0.923917	1	0.595846	0.763091	0.979596	0.982489	0.943558	0.995575	0.952522	0.128192	0.801802	0.744313	0	1	1	0	0	1	0.0261947	0.139024	0.228819
DDA_top3_count	4	DDA	FragPipe	ROTS	2	0.993527	0.934035	0.991813	0.613105	0.968987	1	0.98604	1	1	0.984464	0.0699638	0.802703	0.766616	0	1	1	1	0	0	0.0109734	0.143293	0
DDA_dlfq_maxlfq_top0	4	DDA	FragPipe	ROTS	3	0.301726	0.667813	0.305959	0.589582	0.46668	0.410324	0.220353	0.238327	0.605457	0.533669	0.463083	0.493393	0.459962	1	0	0	0	0	1	0.0817699	0.0402439	0.620022
DDA_dlfq_maxlfq_top3	4	DDA	FragPipe	ROTS	3	0.306167	0.664576	0.274677	0.575952	0.455407	0.427846	0.264854	0.246048	0.60177	0.559888	0.368915	0.491291	0.461354	1	0	0	1	0	0	0.0902655	0.00670733	0.474737
DDA_dlfq_maxlfq_count	4	DDA	FragPipe	ROTS	3	0.589279	0.916565	0.707079	0.995692	0.863254	0.760277	0.996391	0.616574	0.825959	0.772093	0.352943	0.846847	0.381428	0	0	0	1	0	1	0.00955752	0.164634	0.767568
DDA_dlfq_top0_top3	4	DDA	FragPipe	ROTS	3	0.389563	0.00856603	0.244455	0.0490163	0.0302329	0.209138	0.168945	0.250454	0.00737463	0.265393	0.029023	0.0033033	0.525718	1	0	1	0	0	0	0.080708	0.0231707	0.427011
DDA_dlfq_top0_count	4	DDA	FragPipe	ROTS	3	0.69192	0.627614	0.663459	0.617389	0.559219	0.757766	0.970794	0.744614	0.669617	0.767805	0.0873373	0.537237	0.479856	0	0	1	0	0	1	0.00106194	0.179268	0.995781
DDA_dlfq_top3_count	4	DDA	FragPipe	ROTS	3	0.68888	0.62532	0.775343	0.599071	0.638932	0.768387	0.972135	0.765973	0.666667	0.791453	0.0511453	0.535435	0.499658	0	0	1	1	0	0	0.00743363	0.14939	0.980879
DDA_maxlfq_top0_top3	4	DDA	FragPipe	ROTS	3	0.277302	0.667139	0.320102	0.592643	0.48003	0.406216	0.267751	0.287544	0.60472	0.483204	0.48456	0.492492	0.834895	1	1	0	0	0	0	0.0835398	0.0182927	0.382437
DDA_maxlfq_top0_count	4	DDA	FragPipe	ROTS	3	0.778546	0.910225	0.740483	0.986897	0.829312	0.843084	0.996652	0.739325	0.824484	0.828011	0.495735	0.846246	0.976074	0	1	0	0	0	1	0.0261947	0.139024	0.772585
DDA_maxlfq_top3_count	4	DDA	FragPipe	ROTS	3	0.778169	0.916026	0.591859	1	0.875591	0.863588	0.995652	0.763316	0.826696	0.851878	0.398941	0.846547	0.978937	0	1	0	1	0	0	0.0109734	0.143293	0.781255
DDA_top0_top3_count	4	DDA	FragPipe	ROTS	3	0.514989	0.622218	0.79378	0.616461	0.596512	0.659865	0.97225	0.674665	0.668142	0.645662	0.0660519	0.536036	0.947853	0	1	1	0	0	0	0.00283185	0.157317	0.75021
DDA_dlfq_maxlfq_top0_top3	4	DDA	FragPipe	ROTS	4	0.318503	0.502023	0.286298	0.558019	0.358088	0.363381	0.363351	0.255593	0.45483	0.460539	0.336395	0.37012	0.512095	1	0	0	0	0	0	0.080708	0.0231707	0.500953
DDA_dlfq_maxlfq_top0_count	4	DDA	FragPipe	ROTS	4	0.541436	0.780554	0.604245	0.957418	0.679616	0.692863	0.989101	0.58471	0.731379	0.725394	0.349775	0.680931	0.79326	0	0	0	0	0	1	0.00106194	0.179268	0.790368
DDA_dlfq_maxlfq_top3_count	4	DDA	FragPipe	ROTS	4	0.541609	0.780622	0.587239	0.945463	0.708296	0.705024	0.986932	0.597978	0.730273	0.743828	0.292986	0.68003	0.804228	0	0	0	1	0	0	0.00743363	0.14939	1
DDA_dlfq_top0_top3_count	4	DDA	FragPipe	ROTS	4	0.57078	0.470929	0.619259	0.56879	0.456224	0.598789	0.94355	0.608926	0.50295	0.617578	0.0583894	0.403003	0.713604	0	0	1	0	0	0	0	0.162195	0.985937
DDA_maxlfq_top0_top3_count	4	DDA	FragPipe	ROTS	4	0.495551	0.778902	0.611556	0.954961	0.695361	0.693188	0.987437	0.616213	0.73101	0.702189	0.361322	0.68033	1	0	1	0	0	0	0	0.00283185	0.157317	0.636457
DDA_dlfq_maxlfq_top0_top3_count	4	DDA	FragPipe	ROTS	5	0.493241	0.662606	0.541719	0.88212	0.579517	0.610649	0.969636	0.532684	0.630088	0.649906	0.279774	0.562883	0.894011	0	0	0	0	0	0	0	0.162195	0.954873
DDA_dlfq_maxlfq	5	DDA	FragPipe	limma	2	0	0.987684	0.507944	0.595442	0.424738	0.262586	0.101091	0.0863328	0.941808	0.599784	0.306781	0.730028	0.264939	1	0	0	1	0	1	0.136255	0.00306561	0.859757
DDA_dlfq_top0	5	DDA	FragPipe	limma	2	0.432	0.0107166	0	0.0112283	0	0.327655	0	0.397399	0.0107431	0.303428	0.00476	0.00482093	0.384671	1	0	1	0	0	1	0.100308	0.0141018	0.983776
DDA_dlfq_top3	5	DDA	FragPipe	limma	2	0.454053	0	0.343648	0	0.05571	0.325032	0.0734684	0.466984	0	0.415933	0.0109424	0.00137742	0.447664	1	0	1	1	0	0	0.115714	0.000613136	0.866147
DDA_dlfq_count	5	DDA	FragPipe	limma	2	0.986353	0.769194	0.995536	0.659672	0.8611	0.999907	0.96604	0.87971	0.997314	0.953859	0.201123	0.748623	0.0350588	0	0	1	1	0	1	0.0136939	0.222563	0.790454
DDA_maxlfq_top0	5	DDA	FragPipe	limma	2	0.337432	1	0.557036	0.611275	0.481569	0.441782	0.0964747	0.429923	0.948075	0.726584	0.355147	0.729339	0.221202	1	1	0	0	0	1	0.108182	0	0.338621
DDA_maxlfq_top3	5	DDA	FragPipe	limma	2	0.402191	0.997921	0.069398	0.607335	0.356682	0.468184	0.150767	0.537174	0.948075	0.8174	0.21473	0.730028	0.293651	1	1	0	1	0	0	0.114344	0.00306561	0.229984
DDA_maxlfq_count	5	DDA	FragPipe	limma	2	0.929268	0.84421	0.918372	0.753607	1	0.914333	1	0.867204	0.704566	0.984225	1	1	0.368838	0	1	0	1	0	1	1	1	0.323091
DDA_top0_top3	5	DDA	FragPipe	limma	2	0.135285	0.000479859	0.36638	4.27582e-05	0.0861152	0	0.0636062	0.219295	0.00447628	0.104525	0	0	0.306142	1	1	1	0	0	0	0.100308	0.0141018	0.848724
DDA_top0_count	5	DDA	FragPipe	limma	2	0.929313	0.762316	1	0.682647	0.747712	0.98864	0.962903	0.8948	1	0.940527	0.203115	0.746556	0.264286	0	1	1	0	0	1	0.00616228	0.18271	0.776177
DDA_top3_count	5	DDA	FragPipe	limma	2	1	0.762156	0.996555	0.681344	0.97253	1	0.969093	1	0.998209	1	0.315937	0.746556	0.0233645	0	1	1	1	0	0	0.0102705	0.189454	0.915973
DDA_dlfq_maxlfq_top0	5	DDA	FragPipe	limma	3	0.231848	0.666134	0.354993	0.604036	0.302102	0.344008	0.239201	0.304551	0.633542	0.543266	0.222229	0.488062	0.620639	1	0	0	0	0	1	0.100308	0.0141018	0.918545
DDA_dlfq_maxlfq_top3	5	DDA	FragPipe	limma	3	0.25614	0.661868	0.306997	0.596246	0.279043	0.351934	0.286131	0.363497	0.629961	0.611039	0.177485	0.487144	0.402511	1	0	0	1	0	0	0.114002	0.00367872	1
DDA_dlfq_maxlfq_count	5	DDA	FragPipe	limma	3	0.601646	0.867029	0.807284	0.985365	0.761946	0.725609	0.978267	0.611082	0.881229	0.845956	0.502635	0.826217	0.416804	0	0	0	1	0	1	0.0126669	0.224402	0.590999
DDA_dlfq_top0_top3	5	DDA	FragPipe	limma	3	0.339891	0.00373215	0.236676	0.0372856	0.0472751	0.217562	0.18661	0.361226	0.00507311	0.274629	0.00523413	0.00206609	0.889045	1	0	1	0	0	0	0.100308	0.0141018	0.859459
DDA_dlfq_top0_count	5	DDA	FragPipe	limma	3	0.677377	0.514075	0.665179	0.686288	0.53627	0.772068	0.876568	0.723969	0.669352	0.732605	0.136333	0.5	0.328646	0	0	1	0	0	1	0	0.193746	0.916895
DDA_dlfq_top3_count	5	DDA	FragPipe	limma	3	0.701568	0.51045	0.778579	0.676974	0.62978	0.77498	0.88103	0.782231	0.665175	0.789931	0.176001	0.498852	0.482904	0	0	1	1	0	0	0.0102705	0.189454	0.970182
DDA_maxlfq_top0_top3	5	DDA	FragPipe	limma	3	0.212219	0.666134	0.330938	0.60101	0.308122	0.303322	0.282243	0.395464	0.633542	0.549503	0.189959	0.486455	0.636936	1	1	0	0	0	0	0.100308	0.0141018	0.433468
DDA_maxlfq_top0_count	5	DDA	FragPipe	limma	3	0.70892	0.868842	0.825136	1	0.743094	0.781585	0.977518	0.730642	0.884214	0.883779	0.519421	0.825298	0.144763	0	1	0	0	0	1	0.00616228	0.18271	0
DDA_maxlfq_top3_count	5	DDA	FragPipe	limma	3	0.749469	0.868096	0.661442	0.997462	0.776404	0.794172	0.975021	0.801459	0.883617	0.933875	0.510222	0.825528	0.377564	0	1	0	1	0	0	0.00924341	0.191294	0.08365
DDA_top0_top3_count	5	DDA	FragPipe	limma	3	0.531985	0.508317	0.787645	0.692511	0.602119	0.66288	0.876713	0.704698	0.667562	0.681684	0.173017	0.497704	0.311602	0	1	1	0	0	0	0	0.193746	0.701188
DDA_dlfq_maxlfq_top0_top3	5	DDA	FragPipe	limma	4	0.259674	0.499467	0.307401	0.54207	0.234136	0.304207	0.358696	0.356184	0.47553	0.494609	0.148727	0.365932	0.834988	1	0	0	0	0	0	0.100308	0.0141018	0.926505
DDA_dlfq_maxlfq_top0_count	5	DDA	FragPipe	limma	4	0.513892	0.72902	0.663148	0.979971	0.585853	0.655817	0.893953	0.592561	0.767084	0.751401	0.345154	0.659894	0.544199	0	0	0	0	0	1	0	0.193746	0.799777
DDA_dlfq_maxlfq_top3_count	5	DDA	FragPipe	limma	4	0.534275	0.726861	0.638575	0.974121	0.611793	0.661674	0.883949	0.639567	0.764996	0.7952	0.341586	0.659435	0.434505	0	0	0	1	0	0	0.00924341	0.191294	0.666213
DDA_dlfq_top0_top3_count	5	DDA	FragPipe	limma	4	0.562363	0.384144	0.61702	0.659625	0.453861	0.606872	0.614606	0.643031	0.501791	0.619712	0.122646	0.374656	0.776439	0	0	1	0	0	0	0	0.193746	0.73395
DDA_maxlfq_top0_top3_count	5	DDA	FragPipe	limma	4	0.48832	0.727847	0.65129	0.987782	0.607435	0.63549	0.881443	0.658066	0.767234	0.76221	0.348155	0.658747	0.544992	0	1	0	0	0	0	0	0.193746	0.0346847
DDA_dlfq_maxlfq_top0_top3_count	5	DDA	FragPipe	limma	5	0.471434	0.613468	0.575487	0.95695	0.498615	0.572812	0.614116	0.577882	0.655327	0.684627	0.261254	0.543733	0.805747	0	0	0	0	0	0	0	0.193746	0.565386
DDA_dlfq_maxlfq	5	DDA	FragPipe	ROTS	2	0	0.987684	0.507944	0.595442	0.424738	0.262586	0.101091	0	0.941808	0.407441	0.361626	0.730028	0.197944	1	0	0	1	0	1	0.136255	0.00306561	0.825126
DDA_dlfq_top0	5	DDA	FragPipe	ROTS	2	0.432	0.0107166	0	0.0112283	0	0.327655	0	0.296467	0.0107431	0.158923	0.011376	0.00482093	0.226682	1	0	1	0	0	1	0.100308	0.0141018	0.887345
DDA_dlfq_top3	5	DDA	FragPipe	ROTS	2	0.454053	0	0.343648	0	0.05571	0.325032	0.0734684	0.394005	0	0.301134	0.0761444	0.00137742	0.571697	1	0	1	1	0	0	0.115714	0.000613136	0.872167
DDA_dlfq_count	5	DDA	FragPipe	ROTS	2	0.986353	0.769194	0.995536	0.659672	0.8611	0.999907	0.96604	0.828634	0.997314	0.886779	0.0423773	0.748623	0.428169	0	0	1	1	0	1	0.0136939	0.222563	0.546245
DDA_maxlfq_top0	5	DDA	FragPipe	ROTS	2	0.337432	1	0.557036	0.611275	0.481569	0.441782	0.0964747	0.33474	0.948075	0.617545	0.298747	0.729339	0.120493	1	1	0	0	0	1	0.108182	0	0.231324
DDA_maxlfq_top3	5	DDA	FragPipe	ROTS	2	0.402191	0.997921	0.069398	0.607335	0.356682	0.468184	0.150767	0.462278	0.948075	0.735676	0.122638	0.730028	0.272451	1	1	0	1	0	0	0.114344	0.00306561	0.310231
DDA_maxlfq_count	5	DDA	FragPipe	ROTS	2	0.929268	0.84421	0.918372	0.753607	1	0.914333	1	0.814059	0.704566	0.92037	0.473933	1	0.406429	0	1	0	1	0	1	1	1	0.457734
DDA_top0_top3	5	DDA	FragPipe	ROTS	2	0.135285	0.000479859	0.36638	4.27582e-05	0.0861152	0	0.0636062	0.171195	0.00447628	0	0.0218458	0	0.27107	1	1	1	0	0	0	0.100308	0.0141018	0.802691
DDA_top0_count	5	DDA	FragPipe	ROTS	2	0.929313	0.762316	1	0.682647	0.747712	0.98864	0.962903	0.849484	1	0.899468	0.0685363	0.746556	0	0	1	1	0	0	1	0.00616228	0.18271	0.234518
DDA_top3_count	5	DDA	FragPipe	ROTS	2	1	0.762156	0.996555	0.681344	0.97253	1	0.969093	0.97563	0.998209	0.972404	0.146024	0.746556	0.41913	0	1	1	1	0	0	0.0102705	0.189454	0.512606
DDA_dlfq_maxlfq_top0	5	DDA	FragPipe	ROTS	3	0.231848	0.666134	0.354993	0.604036	0.302102	0.344008	0.239201	0.210402	0.633542	0.394636	0.223916	0.488062	0.178808	1	0	0	0	0	1	0.100308	0.0141018	0.79653
DDA_dlfq_maxlfq_top3	5	DDA	FragPipe	ROTS	3	0.25614	0.661868	0.306997	0.596246	0.279043	0.351934	0.286131	0.285428	0.629961	0.481417	0.186803	0.487144	0.75704	1	0	0	1	0	0	0.114002	0.00367872	0.839368
DDA_dlfq_maxlfq_count	5	DDA	FragPipe	ROTS	3	0.601646	0.867029	0.807284	0.985365	0.761946	0.725609	0.978267	0.547564	0.881229	0.738197	0.292645	0.826217	0.585502	0	0	0	1	0	1	0.0126669	0.224402	0.887844
DDA_dlfq_top0_top3	5	DDA	FragPipe	ROTS	3	0.339891	0.00373215	0.236676	0.0372856	0.0472751	0.217562	0.18661	0.287222	0.00507311	0.153352	0.0364554	0.00206609	0.29703	1	0	1	0	0	0	0.100308	0.0141018	0.597209
DDA_dlfq_top0_count	5	DDA	FragPipe	ROTS	3	0.677377	0.514075	0.665179	0.686288	0.53627	0.772068	0.876568	0.658195	0.669352	0.64839	0.0407632	0.5	0.650295	0	0	1	0	0	1	0	0.193746	0.423841
DDA_dlfq_top3_count	5	DDA	FragPipe	ROTS	3	0.701568	0.51045	0.778579	0.676974	0.62978	0.77498	0.88103	0.732756	0.665175	0.720106	0.0881818	0.498852	0.975631	0	0	1	1	0	0	0.0102705	0.189454	0.391385
DDA_maxlfq_top0_top3	5	DDA	FragPipe	ROTS	3	0.212219	0.666134	0.330938	0.60101	0.308122	0.303322	0.282243	0.322738	0.633542	0.451074	0.147744	0.486455	0.24431	1	1	0	0	0	0	0.100308	0.0141018	0.198242
DDA_maxlfq_top0_count	5	DDA	FragPipe	ROTS	3	0.70892	0.868842	0.825136	1	0.743094	0.781585	0.977518	0.666094	0.884214	0.812461	0.280405	0.825298	0.328649	0	1	0	0	0	1	0.00616228	0.18271	0.493694
DDA_maxlfq_top3_count	5	DDA	FragPipe	ROTS	3	0.749469	0.868096	0.661442	0.997462	0.776404	0.794172	0.975021	0.750656	0.883617	0.87615	0.247532	0.825528	0.67712	0	1	0	1	0	0	0.00924341	0.191294	0.353046
DDA_top0_top3_count	5	DDA	FragPipe	ROTS	3	0.531985	0.508317	0.787645	0.692511	0.602119	0.66288	0.876713	0.665436	0.667562	0.623957	0.0788019	0.497704	0.731754	0	1	1	0	0	0	0	0.193746	0.7773
DDA_dlfq_maxlfq_top0_top3	5	DDA	FragPipe	ROTS	4	0.259674	0.499467	0.307401	0.54207	0.234136	0.304207	0.358696	0.276448	0.47553	0.37012	0.14873	0.365932	0.486057	1	0	0	0	0	0	0.100308	0.0141018	0.690475
DDA_dlfq_maxlfq_top0_count	5	DDA	FragPipe	ROTS	4	0.513892	0.72902	0.663148	0.979971	0.585853	0.655817	0.893953	0.520564	0.767084	0.648421	0.209433	0.659894	0.748975	0	0	0	0	0	1	0	0.193746	0.556618
DDA_dlfq_maxlfq_top3_count	5	DDA	FragPipe	ROTS	4	0.534275	0.726861	0.638575	0.974121	0.611793	0.661674	0.883949	0.579101	0.764996	0.703967	0.20379	0.659435	0.970167	0	0	0	1	0	0	0.00924341	0.191294	0.986437
DDA_dlfq_top0_top3_count	5	DDA	FragPipe	ROTS	4	0.562363	0.384144	0.61702	0.659625	0.453861	0.606872	0.614606	0.585903	0.501791	0.536451	0.0610506	0.374656	0.953213	0	0	1	0	0	0	0	0.193746	0.530568
DDA_maxlfq_top0_top3_count	5	DDA	FragPipe	ROTS	4	0.48832	0.727847	0.65129	0.987782	0.607435	0.63549	0.881443	0.601231	0.767234	0.690911	0.188621	0.658747	0.823739	0	1	0	0	0	0	0	0.193746	0.295936
DDA_dlfq_maxlfq_top0_top3_count	5	DDA	FragPipe	ROTS	5	0.471434	0.613468	0.575487	0.95695	0.498615	0.572812	0.614116	0.512649	0.655327	0.589974	0.162325	0.543733	1	0	0	0	0	0	0	0	0.193746	0.592437
DDA_dlfq_maxlfq	6	DDA	FragPipe	limma	2	0.439323	0.758134	0.632209	0.965815	0.803469	0.648562	0.441388	0.158346	0.8	0.868518	0.246612	0.978947	0.454293	1	0	0	1	0	1	1	0	0.234751
DDA_dlfq_top0	6	DDA	FragPipe	limma	2	0.656695	0.0368151	0.140579	0.0609618	0.0247785	0.480441	0.011798	0.502808	0	0.563669	0.156279	0.0105263	0.631347	1	0	1	0	0	1	0.689076	0	0.110165
DDA_dlfq_top3	6	DDA	FragPipe	limma	2	0.634248	0.0586473	0.159195	0.12417	0.0247933	0.484587	0.0300305	0.544055	0.034375	0.58618	0.153722	0.0666667	0.613087	1	0	1	1	0	0	0.729412	1	0.324699
DDA_dlfq_count	6	DDA	FragPipe	limma	2	0.959062	0.224315	0.541681	0.196555	0.341026	1	0.988392	0.996684	0.2375	0.887155	0.162416	0.0666667	0.383898	0	0	1	1	0	1	0.00504201	0.413333	0.250233
DDA_maxlfq_top0	6	DDA	FragPipe	limma	2	0.566853	0.837329	0.989537	0.990927	1	0.64174	0.440233	0.471474	0.8625	0.887381	0.781605	0.978947	0.478485	1	1	0	0	0	1	0.689076	0	0.243005
DDA_maxlfq_top3	6	DDA	FragPipe	limma	2	0.54234	0.822346	1	1	0.997779	0.640953	0.419296	0.515779	0.834375	0.88821	0.733422	1	0.465351	1	1	0	1	0	0	0.801681	0.426667	0.138635
DDA_maxlfq_count	6	DDA	FragPipe	limma	2	1	1	0.013626	0.14159	0.87553	0.90028	0.995663	0.944378	1	0.998491	0.446294	0.978947	0.280797	0	1	0	1	0	1	0.0537815	0.0266667	0.148107
DDA_top0_top3	6	DDA	FragPipe	limma	2	0	0	0	0	0	0	0	0.0527109	0.003125	0.138446	0	0.0140351	0.921682	1	1	1	0	0	0	0.689076	0	0.412566
DDA_top0_count	6	DDA	FragPipe	limma	2	0.517521	0.147688	0.697212	0.215994	0.355243	0.878566	0.986815	0.603644	0.18125	0.718013	0.325144	0	0.519394	0	1	1	0	0	1	0	0.453333	0.64595
DDA_top3_count	6	DDA	FragPipe	limma	2	0.787401	0.190068	0.698655	0.222605	0.354881	0.94827	0.98809	0.803243	0.240625	0.781484	0.263977	0.0701754	0.525806	0	1	1	1	0	0	0	0.453333	0.783506
DDA_dlfq_maxlfq_top0	6	DDA	FragPipe	limma	3	0.55671	0.544092	0.587441	0.920566	0.609416	0.590248	0.770406	0.377543	0.554167	0.773189	0.394832	0.65614	0.514778	1	0	0	0	0	1	0.689076	0	0.273848
DDA_dlfq_maxlfq_top3	6	DDA	FragPipe	limma	3	0.540526	0.546376	0.597135	0.958586	0.608681	0.591367	0.756747	0.40606	0.55625	0.780969	0.377918	0.681871	0.506188	1	0	0	1	0	0	0.729412	1	0.150719
DDA_dlfq_maxlfq_count	6	DDA	FragPipe	limma	3	0.847445	0.660816	0.395839	0.833776	0.673342	0.849614	0.998668	0.699803	0.679167	0.918055	0.285107	0.674854	0.436449	0	0	0	1	0	1	0.00504201	0.413333	0.0244127
DDA_dlfq_top0_top3	6	DDA	FragPipe	limma	3	0.414835	0.0318208	0.0999245	0.111479	0.0165239	0.321676	0.521971	0.366525	0.0125	0.429432	0.103333	0.0304094	0.935361	1	0	1	0	0	0	0.689076	0	0.456331
DDA_dlfq_top0_count	6	DDA	FragPipe	limma	3	0.693743	0.136273	0.459824	0.328956	0.240349	0.786336	0.996154	0.701045	0.139583	0.722946	0.214613	0.025731	0.509784	0	0	1	0	0	1	0	0.453333	0.257941
DDA_dlfq_top3_count	6	DDA	FragPipe	limma	3	0.767263	0.157677	0.46651	0.373945	0.240234	0.810952	0.996217	0.781328	0.170833	0.751606	0.193372	0.0678363	0.488778	0	0	1	1	0	0	0	0.453333	0.238445
DDA_maxlfq_top0_top3	6	DDA	FragPipe	limma	3	0.121861	0.553225	0.663179	0.902569	0.665926	0.427564	0.756494	0.346655	0.566667	0.638012	0.505009	0.664327	0.919003	1	1	0	0	0	0	0.689076	0	0.122578
DDA_maxlfq_top0_count	6	DDA	FragPipe	limma	3	0.63047	0.661672	0.566792	0.851529	0.743591	0.806862	0.998666	0.673165	0.68125	0.867962	0.517681	0.652632	0.395704	0	1	0	0	0	1	0	0.453333	0.287246
DDA_maxlfq_top3_count	6	DDA	FragPipe	limma	3	0.752091	0.670805	0.57076	0.871889	0.74273	0.829834	0.998548	0.754467	0.691667	0.889395	0.481231	0.683041	0.38288	0	1	0	1	0	0	0	0.453333	0.282582
DDA_top0_top3_count	6	DDA	FragPipe	limma	3	0.390887	0.112586	0.465289	0.292114	0.236708	0.608945	0.995976	0.486533	0.141667	0.545981	0.196374	0.0280702	0.679355	0	1	1	0	0	0	0	0.453333	0.600687
DDA_dlfq_maxlfq_top0_top3	6	DDA	FragPipe	limma	4	0.398964	0.418878	0.48692	0.861045	0.475137	0.482714	0.899965	0.374196	0.422396	0.655401	0.345273	0.508187	0.91431	1	0	0	0	0	0	0.689076	0	0.2315
DDA_dlfq_maxlfq_top0_count	6	DDA	FragPipe	limma	4	0.671537	0.500713	0.502474	0.858875	0.566674	0.758265	0.999667	0.612889	0.513542	0.820538	0.353058	0.502339	0.541071	0	0	0	0	0	1	0	0.453333	0.122939
DDA_dlfq_maxlfq_top3_count	6	DDA	FragPipe	limma	4	0.71372	0.508918	0.507561	0.88689	0.566247	0.770442	0.999619	0.660414	0.524479	0.835006	0.334407	0.526901	0.526923	0	0	0	1	0	0	0	0.453333	0.241967
DDA_dlfq_top0_top3_count	6	DDA	FragPipe	limma	4	0.564099	0.109589	0.372887	0.305596	0.183454	0.631977	0.998718	0.583858	0.116146	0.612491	0.176923	0.0380117	0.874301	0	0	1	0	0	0	0	0.453333	0.228075
DDA_maxlfq_top0_top3_count	6	DDA	FragPipe	limma	4	0.444407	0.499572	0.566505	0.845537	0.597239	0.668301	0.999618	0.565205	0.520312	0.735338	0.425074	0.507018	0.851291	0	1	0	0	0	0	0	0.453333	0.247201
DDA_dlfq_maxlfq_top0_top3_count	6	DDA	FragPipe	limma	5	0.556603	0.407534	0.487269	0.829326	0.47775	0.66234	1	0.559312	0.419375	0.731755	0.326947	0.416491	0.914288	0	0	0	0	0	0	0	0.453333	0.0427084
DDA_dlfq_maxlfq	6	DDA	FragPipe	ROTS	2	0.439323	0.758134	0.632209	0.965815	0.803469	0.648562	0.441388	0.139186	0.8	0.85708	0.307525	0.978947	0.72132	1	0	0	1	0	1	1	0	0.358424
DDA_dlfq_top0	6	DDA	FragPipe	ROTS	2	0.656695	0.0368151	0.140579	0.0609618	0.0247785	0.480441	0.011798	0.480052	0	0.480885	0.217756	0.0105263	0.607658	1	0	1	0	0	1	0.689076	0	0.749496
DDA_dlfq_top3	6	DDA	FragPipe	ROTS	2	0.634248	0.0586473	0.159195	0.12417	0.0247933	0.484587	0.0300305	0.500127	0.034375	0.517167	0.182889	0.0666667	0.660639	1	0	1	1	0	0	0.729412	1	0.597606
DDA_dlfq_count	6	DDA	FragPipe	ROTS	2	0.959062	0.224315	0.541681	0.196555	0.341026	1	0.988392	1	0.2375	0.873881	0.125449	0.0666667	0.0710238	0	0	1	1	0	1	0.00504201	0.413333	0.538526
DDA_maxlfq_top0	6	DDA	FragPipe	ROTS	2	0.566853	0.837329	0.989537	0.990927	1	0.64174	0.440233	0.490858	0.8625	0.864231	1	0.978947	0.615722	1	1	0	0	0	1	0.689076	0	0.97897
DDA_maxlfq_top3	6	DDA	FragPipe	ROTS	2	0.54234	0.822346	1	1	0.997779	0.640953	0.419296	0.494133	0.834375	0.871186	0.884523	1	0.518472	1	1	0	1	0	0	0.801681	0.426667	0.593937
DDA_maxlfq_count	6	DDA	FragPipe	ROTS	2	1	1	0.013626	0.14159	0.87553	0.90028	0.995663	0.953962	1	1	0.425582	0.978947	0	0	1	0	1	0	1	0.0537815	0.0266667	0.406971
DDA_top0_top3	6	DDA	FragPipe	ROTS	2	0	0	0	0	0	0	0	0	0.003125	0	0.00368441	0.0140351	0.737851	1	1	1	0	0	0	0.689076	0	0.548046
DDA_top0_count	6	DDA	FragPipe	ROTS	2	0.517521	0.147688	0.697212	0.215994	0.355243	0.878566	0.986815	0.607906	0.18125	0.681973	0.380028	0	0.685127	0	1	1	0	0	1	0	0.453333	1
DDA_top3_count	6	DDA	FragPipe	ROTS	2	0.787401	0.190068	0.698655	0.222605	0.354881	0.94827	0.98809	0.789122	0.240625	0.754336	0.309831	0.0701754	0.715644	0	1	1	1	0	0	0	0.453333	0.870193
DDA_dlfq_maxlfq_top0	6	DDA	FragPipe	ROTS	3	0.55671	0.544092	0.587441	0.920566	0.609416	0.590248	0.770406	0.370032	0.554167	0.734066	0.508427	0.65614	0.608164	1	0	0	0	0	1	0.689076	0	0.43157
DDA_dlfq_maxlfq_top3	6	DDA	FragPipe	ROTS	3	0.540526	0.546376	0.597135	0.958586	0.608681	0.591367	0.756747	0.377815	0.55625	0.748478	0.458312	0.681871	0.546848	1	0	0	1	0	0	0.729412	1	0.375368
DDA_dlfq_maxlfq_count	6	DDA	FragPipe	ROTS	3	0.847445	0.660816	0.395839	0.833776	0.673342	0.849614	0.998668	0.697716	0.679167	0.910321	0.286185	0.674854	0.287384	0	0	0	1	0	1	0.00504201	0.413333	0.493145
DDA_dlfq_top0_top3	6	DDA	FragPipe	ROTS	3	0.414835	0.0318208	0.0999245	0.111479	0.0165239	0.321676	0.521971	0.326726	0.0125	0.332684	0.134776	0.0304094	0.619156	1	0	1	0	0	0	0.689076	0	0.284775
DDA_dlfq_top0_count	6	DDA	FragPipe	ROTS	3	0.693743	0.136273	0.459824	0.328956	0.240349	0.786336	0.996154	0.695986	0.139583	0.678913	0.241077	0.025731	0.761539	0	0	1	0	0	1	0	0.453333	0.0843724
DDA_dlfq_top3_count	6	DDA	FragPipe	ROTS	3	0.767263	0.157677	0.46651	0.373945	0.240234	0.810952	0.996217	0.763083	0.170833	0.715128	0.206056	0.0678363	0.767288	0	0	1	1	0	0	0	0.453333	0.496877
DDA_maxlfq_top0_top3	6	DDA	FragPipe	ROTS	3	0.121861	0.553225	0.663179	0.902569	0.665926	0.427564	0.756494	0.328331	0.566667	0.578472	0.629402	0.664327	0.441768	1	1	0	0	0	0	0.689076	0	0.260095
DDA_maxlfq_top0_count	6	DDA	FragPipe	ROTS	3	0.63047	0.661672	0.566792	0.851529	0.743591	0.806862	0.998666	0.684242	0.68125	0.848735	0.60187	0.652632	0.687535	0	1	0	0	0	1	0	0.453333	0.376466
DDA_maxlfq_top3_count	6	DDA	FragPipe	ROTS	3	0.752091	0.670805	0.57076	0.871889	0.74273	0.829834	0.998548	0.745739	0.691667	0.875174	0.539979	0.683041	0.735091	0	1	0	1	0	0	0	0.453333	0.375405
DDA_top0_top3_count	6	DDA	FragPipe	ROTS	3	0.390887	0.112586	0.465289	0.292114	0.236708	0.608945	0.995976	0.465676	0.141667	0.47877	0.231181	0.0280702	1	0	1	1	0	0	0	0	0.453333	0.464919
DDA_dlfq_maxlfq_top0_top3	6	DDA	FragPipe	ROTS	4	0.398964	0.418878	0.48692	0.861045	0.475137	0.482714	0.899965	0.350726	0.422396	0.598425	0.432729	0.508187	0.44761	1	0	0	0	0	0	0.689076	0	0.435149
DDA_dlfq_maxlfq_top0_count	6	DDA	FragPipe	ROTS	4	0.671537	0.500713	0.502474	0.858875	0.566674	0.758265	0.999667	0.611994	0.513542	0.793009	0.40939	0.502339	0.502153	0	0	0	0	0	1	0	0.453333	0.43157
DDA_dlfq_maxlfq_top3_count	6	DDA	FragPipe	ROTS	4	0.71372	0.508918	0.507561	0.88689	0.566247	0.770442	0.999619	0.646088	0.524479	0.812275	0.372633	0.526901	0.531868	0	0	0	1	0	0	0	0.453333	0.275255
DDA_dlfq_top0_top3_count	6	DDA	FragPipe	ROTS	4	0.564099	0.109589	0.372887	0.305596	0.183454	0.631977	0.998718	0.562868	0.116146	0.551374	0.203273	0.0380117	0.932147	0	0	1	0	0	0	0	0.453333	0.0576641
DDA_maxlfq_top0_top3_count	6	DDA	FragPipe	ROTS	4	0.444407	0.499572	0.566505	0.845537	0.597239	0.668301	0.999618	0.555997	0.520312	0.695288	0.500608	0.507018	0.970163	0	1	0	0	0	0	0	0.453333	0.428392
DDA_dlfq_maxlfq_top0_top3_count	6	DDA	FragPipe	ROTS	5	0.556603	0.407534	0.487269	0.829326	0.47775	0.66234	1	0.545535	0.419375	0.690074	0.383727	0.416491	0.81731	0	0	0	0	0	0	0	0.453333	0
DDA_dlfq_maxlfq	7	DDA	FragPipe	limma	2	0.223223	0.965719	0.654897	0.953751	0.893804	0.495863	0.284916	0.133451	0.871859	0.786034	0.367157	0.771739	0.536891	1	0	0	1	0	1	0.193548	0	0.916727
DDA_dlfq_top0	7	DDA	FragPipe	limma	2	0.548988	0.0284281	0.304932	0.0844908	0.0059021	0.37043	0.00348488	0.504892	0.0150754	0.531744	0.083971	0.0130435	0.417662	1	0	1	0	0	1	0.132033	0	0.686119
DDA_dlfq_top3	7	DDA	FragPipe	limma	2	0.55064	0.0317726	0.393604	0.101995	0.00142653	0.366144	0.00888315	0.543877	0.0201005	0.581708	0.0549036	0.0173913	0.42596	1	0	1	1	0	0	0.134284	0.0249433	0.878639
DDA_dlfq_count	7	DDA	FragPipe	limma	2	1	0.811873	0.956909	0.383078	0.91012	1	0.992458	0.97866	0.984925	0.985309	0.384675	0.843478	0.564051	0	0	1	1	0	1	0.0285071	0.498866	0.775911
DDA_maxlfq_top0	7	DDA	FragPipe	limma	2	0.388492	1	0.788975	0.962831	1	0.515855	0.307722	0.468415	0.89196	0.855855	0.656647	0.771739	0.0506272	1	1	0	0	0	1	0.132033	0	1
DDA_maxlfq_top3	7	DDA	FragPipe	limma	2	0.392682	0.996656	0.605173	0.97174	0.969317	0.518616	0.269392	0.470105	0.886935	0.876695	0.469043	0.771739	0.0700069	1	1	0	1	0	0	0.140285	0.00680273	0.897411
DDA_maxlfq_count	7	DDA	FragPipe	limma	2	0.957207	0.700669	0	0.326042	0.581667	0.896552	0.998193	0.904511	0.469849	0.932058	0.0661465	1	0.0416797	0	1	0	1	0	1	1	1	0.860387
DDA_top0_top3	7	DDA	FragPipe	limma	2	0	0	0.349675	0	0	0	0	0.0941217	0	0.180782	0.00501124	0	0.787034	1	1	1	0	0	0	0.132033	0	0.00319214
DDA_top0_count	7	DDA	FragPipe	limma	2	0.90501	0.809365	1	0.390227	0.914466	0.940119	0.990594	0.915276	1	0.973912	0.566246	0.841304	0.870706	0	1	1	0	0	1	0	0.399093	0.842629
DDA_top3_count	7	DDA	FragPipe	limma	2	0.989105	0.811037	0.979456	0.393322	0.965949	0.958969	0.992696	1	0.994975	1	0.399377	0.841304	0.876636	0	1	1	1	0	0	0.00375094	0.419501	0.715993
DDA_dlfq_maxlfq_top0	7	DDA	FragPipe	limma	3	0.364318	0.664716	0.582934	0.859882	0.633235	0.460716	0.511268	0.36892	0.592965	0.724545	0.369258	0.518841	0.653813	1	0	0	0	0	1	0.132033	0	0.825344
DDA_dlfq_maxlfq_top3	7	DDA	FragPipe	limma	3	0.369569	0.664716	0.551225	0.872192	0.621516	0.460208	0.477025	0.382478	0.592965	0.748146	0.297035	0.52029	0.676297	1	0	0	1	0	0	0.134284	0.0249433	0.825344
DDA_dlfq_maxlfq_count	7	DDA	FragPipe	limma	3	0.667517	0.826087	0.537268	0.94055	0.795197	0.797472	0.999319	0.672208	0.775544	0.901134	0.27266	0.871739	0.427534	0	0	0	1	0	1	0.0285071	0.498866	0.978218
DDA_dlfq_top0_top3	7	DDA	FragPipe	limma	3	0.363003	0.0200669	0.349404	0.0914462	0.00244287	0.245525	0.231367	0.380964	0.0117253	0.431411	0.047962	0.0101449	0.792842	1	0	1	0	0	0	0.132033	0	0.816588
DDA_dlfq_top0_count	7	DDA	FragPipe	limma	3	0.678938	0.549889	0.753947	0.451472	0.610163	0.770183	0.996589	0.79961	0.666667	0.830322	0.344964	0.565942	0.896725	0	0	1	0	0	1	0	0.399093	0.878639
DDA_dlfq_top3_count	7	DDA	FragPipe	limma	3	0.70048	0.551561	0.776656	0.46379	0.625832	0.775038	0.997106	0.840846	0.666667	0.855672	0.279652	0.567391	0.8978	0	0	1	1	0	0	0	0.430839	0.825344
DDA_maxlfq_top0_top3	7	DDA	FragPipe	limma	3	0.102185	0.665552	0.581274	0.816513	0.656439	0.344824	0.500702	0.344214	0.592965	0.637777	0.3769	0.514493	0.382602	1	1	0	0	0	0	0.132033	0	0.635685
DDA_maxlfq_top0_count	7	DDA	FragPipe	limma	3	0.733978	0.836678	0.596325	0.945667	0.832044	0.784175	0.999323	0.762734	0.78727	0.920609	0.42968	0.871014	0.380101	0	1	0	0	0	1	0	0.399093	0.897411
DDA_maxlfq_top3_count	7	DDA	FragPipe	limma	3	0.749565	0.83612	0.52821	0.954127	0.838978	0.791379	0.999301	0.791539	0.78392	0.936251	0.311522	0.871014	0.399621	0	1	0	1	0	0	0.00375094	0.419501	0.860387
DDA_top0_top3_count	7	DDA	FragPipe	limma	3	0.348581	0.540134	0.776377	0.407167	0.626805	0.633029	0.99675	0.669799	0.664992	0.718231	0.323545	0.56087	0.997194	0	1	1	0	0	0	0	0.399093	0.279612
DDA_dlfq_maxlfq_top0_top3	7	DDA	FragPipe	limma	4	0.297532	0.503763	0.516209	0.776211	0.478408	0.377818	0.656557	0.369144	0.447655	0.63547	0.272789	0.390942	0.510926	1	0	0	0	0	0	0.132033	0	0.623302
DDA_dlfq_maxlfq_top0_count	7	DDA	FragPipe	limma	4	0.545979	0.719342	0.617619	0.987563	0.71766	0.703137	0.99977	0.650868	0.705611	0.844152	0.35414	0.706884	0.514499	0	0	0	0	0	1	0	0.399093	0.327766
DDA_dlfq_maxlfq_top3_count	7	DDA	FragPipe	limma	4	0.557701	0.719621	0.59834	1	0.720381	0.706024	0.999764	0.671768	0.704774	0.860301	0.290217	0.707609	0.517157	0	0	0	1	0	0	0	0.430839	0.498239
DDA_dlfq_top0_top3_count	7	DDA	FragPipe	limma	4	0.519979	0.415412	0.664096	0.466636	0.466311	0.605944	0.998531	0.672805	0.502513	0.708909	0.249031	0.426087	1	0	0	1	0	0	0	0	0.399093	0.808511
DDA_maxlfq_top0_top3_count	7	DDA	FragPipe	limma	4	0.34264	0.719621	0.620547	0.96571	0.738567	0.638352	0.999771	0.642072	0.707286	0.803217	0.360412	0.704348	0.87912	0	1	0	0	0	0	0	0.399093	0.842629
DDA_dlfq_maxlfq_top0_top3_count	7	DDA	FragPipe	limma	5	0.450792	0.615552	0.603362	0.997473	0.624265	0.606255	1	0.601331	0.613568	0.77041	0.305318	0.587174	0.806971	0	0	0	0	0	0	0	0.399093	0.148092
DDA_dlfq_maxlfq	7	DDA	FragPipe	ROTS	2	0.223223	0.965719	0.654897	0.953751	0.893804	0.495863	0.284916	0.0346398	0.871859	0.630625	0.309137	0.771739	0.492129	1	0	0	1	0	1	0.193548	0	0.93349
DDA_dlfq_top0	7	DDA	FragPipe	ROTS	2	0.548988	0.0284281	0.304932	0.0844908	0.0059021	0.37043	0.00348488	0.411073	0.0150754	0.386786	0.0909064	0.0130435	0.39437	1	0	1	0	0	1	0.132033	0	0.755192
DDA_dlfq_top3	7	DDA	FragPipe	ROTS	2	0.55064	0.0317726	0.393604	0.101995	0.00142653	0.366144	0.00888315	0.439523	0.0201005	0.440006	0.0423123	0.0173913	0.431463	1	0	1	1	0	0	0.134284	0.0249433	0.624186
DDA_dlfq_count	7	DDA	FragPipe	ROTS	2	1	0.811873	0.956909	0.383078	0.91012	1	0.992458	0.958901	0.984925	0.944762	0.66031	0.843478	0.179469	0	0	1	1	0	1	0.0285071	0.498866	0.878639
DDA_maxlfq_top0	7	DDA	FragPipe	ROTS	2	0.388492	1	0.788975	0.962831	1	0.515855	0.307722	0.392933	0.89196	0.713947	0.645292	0.771739	0.0219707	1	1	0	0	0	1	0.132033	0	0.878639
DDA_maxlfq_top3	7	DDA	FragPipe	ROTS	2	0.392682	0.996656	0.605173	0.97174	0.969317	0.518616	0.269392	0.37875	0.886935	0.732515	0.486429	0.771739	0	1	1	0	1	0	0	0.140285	0.00680273	0.688006
DDA_maxlfq_count	7	DDA	FragPipe	ROTS	2	0.957207	0.700669	0	0.326042	0.581667	0.896552	0.998193	0.887645	0.469849	0.858605	0.104412	1	0.239968	0	1	0	1	0	1	1	1	0.9571
DDA_top0_top3	7	DDA	FragPipe	ROTS	2	0	0	0.349675	0	0	0	0	0	0	0	0	0	0.4503	1	1	1	0	0	0	0.132033	0	0
DDA_top0_count	7	DDA	FragPipe	ROTS	2	0.90501	0.809365	1	0.390227	0.914466	0.940119	0.990594	0.904233	1	0.926691	1	0.841304	0.751125	0	1	1	0	0	1	0	0.399093	0.808511
DDA_top3_count	7	DDA	FragPipe	ROTS	2	0.989105	0.811037	0.979456	0.393322	0.965949	0.958969	0.992696	0.975722	0.994975	0.944491	0.7987	0.841304	0.755474	0	1	1	1	0	0	0.00375094	0.419501	0.860387
DDA_dlfq_maxlfq_top0	7	DDA	FragPipe	ROTS	3	0.364318	0.664716	0.582934	0.859882	0.633235	0.460716	0.511268	0.279549	0.592965	0.577119	0.348445	0.518841	0.252427	1	0	0	0	0	1	0.132033	0	0.873299
DDA_dlfq_maxlfq_top3	7	DDA	FragPipe	ROTS	3	0.369569	0.664716	0.551225	0.872192	0.621516	0.460208	0.477025	0.284304	0.592965	0.601049	0.279293	0.52029	0.268813	1	0	0	1	0	0	0.134284	0.0249433	0.808511
DDA_dlfq_maxlfq_count	7	DDA	FragPipe	ROTS	3	0.667517	0.826087	0.537268	0.94055	0.795197	0.797472	0.999319	0.627062	0.775544	0.81133	0.357953	0.871739	0.323628	0	0	0	1	0	1	0.0285071	0.498866	0.909622
DDA_dlfq_top0_top3	7	DDA	FragPipe	ROTS	3	0.363003	0.0200669	0.349404	0.0914462	0.00244287	0.245525	0.231367	0.283532	0.0117253	0.275598	0.0444062	0.0101449	0.414078	1	0	1	0	0	0	0.132033	0	0.33101
DDA_dlfq_top0_count	7	DDA	FragPipe	ROTS	3	0.678938	0.549889	0.753947	0.451472	0.610163	0.770183	0.996589	0.758069	0.666667	0.752747	0.583739	0.565942	0.400931	0	0	1	0	0	1	0	0.399093	0.816588
DDA_dlfq_top3_count	7	DDA	FragPipe	ROTS	3	0.70048	0.551561	0.776656	0.46379	0.625832	0.775038	0.997106	0.791382	0.666667	0.77642	0.500441	0.567391	0.412062	0	0	1	1	0	0	0	0.430839	0.636061
DDA_maxlfq_top0_top3	7	DDA	FragPipe	ROTS	3	0.102185	0.665552	0.581274	0.816513	0.656439	0.344824	0.500702	0.257228	0.592965	0.482154	0.37724	0.514493	0.179053	1	1	0	0	0	0	0.132033	0	0.688006
DDA_maxlfq_top0_count	7	DDA	FragPipe	ROTS	3	0.733978	0.836678	0.596325	0.945667	0.832044	0.784175	0.999323	0.72827	0.78727	0.833081	0.583235	0.871014	0.100522	0	1	0	0	0	1	0	0.399093	0.978218
DDA_maxlfq_top3_count	7	DDA	FragPipe	ROTS	3	0.749565	0.83612	0.52821	0.954127	0.838978	0.791379	0.999301	0.747372	0.78392	0.845203	0.46318	0.871014	0.109475	0	1	0	1	0	0	0.00375094	0.419501	0.674487
DDA_top0_top3_count	7	DDA	FragPipe	ROTS	3	0.348581	0.540134	0.776377	0.407167	0.626805	0.633029	0.99675	0.626652	0.664992	0.623727	0.599567	0.56087	0.890623	0	1	1	0	0	0	0	0.399093	0.0807912
DDA_dlfq_maxlfq_top0_top3	7	DDA	FragPipe	ROTS	4	0.297532	0.503763	0.516209	0.776211	0.478408	0.377818	0.656557	0.276153	0.447655	0.48398	0.262346	0.390942	0.420891	1	0	0	0	0	0	0.132033	0	0.673203
DDA_dlfq_maxlfq_top0_count	7	DDA	FragPipe	ROTS	4	0.545979	0.719342	0.617619	0.987563	0.71766	0.703137	0.99977	0.598238	0.705611	0.743569	0.468343	0.706884	0.132934	0	0	0	0	0	1	0	0.399093	0.730485
DDA_dlfq_maxlfq_top3_count	7	DDA	FragPipe	ROTS	4	0.557701	0.719621	0.59834	1	0.720381	0.706024	0.999764	0.61253	0.704774	0.758501	0.400217	0.707609	0.150833	0	0	0	1	0	0	0	0.430839	0.792111
DDA_dlfq_top0_top3_count	7	DDA	FragPipe	ROTS	4	0.519979	0.415412	0.664096	0.466636	0.466311	0.605944	0.998531	0.614909	0.502513	0.607123	0.432038	0.426087	0.558224	0	0	1	0	0	0	0	0.399093	0.07309
DDA_maxlfq_top0_top3_count	7	DDA	FragPipe	ROTS	4	0.34264	0.719621	0.620547	0.96571	0.738567	0.638352	0.999771	0.589881	0.707286	0.696041	0.505805	0.704348	0.538714	0	1	0	0	0	0	0	0.399093	0.808511
DDA_dlfq_maxlfq_top0_top3_count	7	DDA	FragPipe	ROTS	5	0.450792	0.615552	0.603362	0.997473	0.624265	0.606255	1	0.538342	0.613568	0.657843	0.41375	0.587174	0.26972	0	0	0	0	0	0	0	0.399093	0.291954
DDA_dlfq_maxlfq	9	DDA	FragPipe	limma	2	0	0.952281	0	0.969033	0.741056	0.378494	0.257351	0.183187	0.960357	0.900164	0.425154	0.98538	0.292905	1	0	0	1	0	1	0.527372	0.00447028	0.473399
DDA_dlfq_top0	9	DDA	FragPipe	limma	2	0.452318	0.0409613	0.392823	0.112227	0.0214463	0.552011	0	0.511204	0.0426165	0.515708	0.116738	0.0419103	0.172369	1	0	1	0	0	1	0.368841	0	0.604469
DDA_dlfq_top3	9	DDA	FragPipe	limma	2	0.497493	0.0454894	0.503536	0.129039	0.0174298	0.563511	0.0269119	0.533494	0.0436075	0.535123	0.140016	0.042885	0.177975	1	0	1	1	0	0	0.374772	0.0406795	0.859283
DDA_dlfq_count	9	DDA	FragPipe	limma	2	1	0.500662	0.815315	0.289672	0.0945727	1	0.993634	0.993878	0.443013	0.92785	0.0193979	0.356725	0.112233	0	0	1	1	0	1	0.0193887	1	0.725786
DDA_maxlfq_top0	9	DDA	FragPipe	limma	2	0.365485	1	0.684385	0.982028	1	0.571082	0.251642	0.543029	1	0.894742	0.863953	0.983431	0.79991	1	1	0	0	0	1	0.368841	0	0.187848
DDA_maxlfq_top3	9	DDA	FragPipe	limma	2	0.399391	0.994079	0.535883	0.989188	0.984466	0.576844	0.247609	0.575742	0.999009	0.905435	1	0.983431	0.803748	1	1	0	1	0	0	0.39188	0.00715243	0
DDA_maxlfq_count	9	DDA	FragPipe	limma	2	0.977115	0.860745	0.123195	0.219625	0.827921	0.821234	0.999208	0.88773	0.793855	1	0.443558	1	0.725925	0	1	0	1	0	1	1	0.343317	0.0133361
DDA_top0_top3	9	DDA	FragPipe	limma	2	0.0434982	0	0.48753	0	0	0	0.00633482	0.0395116	0	0.0547334	0.00355732	0	0.547195	1	1	1	0	0	0	0.368841	0	0.537121
DDA_top0_count	9	DDA	FragPipe	limma	2	0.824757	0.463393	1	0.296227	0.0844176	0.965214	0.992901	0.884206	0.421209	0.857891	0.217489	0.324561	0.655696	0	1	1	0	0	1	0	0.722843	0.874861
DDA_top3_count	9	DDA	FragPipe	limma	2	0.938847	0.467503	0.997137	0.299058	0.0924394	0.99232	0.993298	1	0.420218	0.880185	0.250074	0.324561	0.665566	0	1	1	1	0	0	0.00661496	0.762181	0.626234
DDA_dlfq_maxlfq_top0	9	DDA	FragPipe	limma	3	0.297407	0.664414	0.359069	0.918524	0.587501	0.500529	0.353375	0.412473	0.667658	0.770205	0.468615	0.67024	0.772012	1	0	0	0	0	1	0.368841	0	0.582524
DDA_dlfq_maxlfq_top3	9	DDA	FragPipe	limma	3	0.317599	0.66395	0.346473	0.927923	0.580984	0.506283	0.336689	0.430808	0.667658	0.780241	0.521723	0.670565	0.783042	1	0	0	1	0	0	0.374772	0.0406795	0.767325
DDA_dlfq_maxlfq_count	9	DDA	FragPipe	limma	3	0.715391	0.77123	0.312837	0.880436	0.554517	0.733243	0.999638	0.688265	0.732408	0.942671	0.296037	0.780702	0.729607	0	0	0	1	0	1	0.0193887	1	0.798447
DDA_dlfq_top0_top3	9	DDA	FragPipe	limma	3	0.327658	0.0288169	0.461297	0.115064	0.0129587	0.371841	0.133113	0.361403	0.0287413	0.368522	0.0867702	0.0282651	0.546478	1	0	1	0	0	0	0.368841	0	0.548189
DDA_dlfq_top0_count	9	DDA	FragPipe	limma	3	0.683974	0.335005	0.736046	0.424178	0.0668122	0.839075	0.996154	0.79643	0.302279	0.76715	0.117875	0.241066	0.598256	0	0	1	0	0	1	0	0.722843	0.807133
DDA_dlfq_top3_count	9	DDA	FragPipe	limma	3	0.730468	0.337885	0.771996	0.435187	0.0681473	0.851944	0.996111	0.842457	0.302279	0.781053	0.136496	0.241391	0.615524	0	0	1	1	0	0	0.000456211	0.774251	0.913022
DDA_maxlfq_top0_top3	9	DDA	FragPipe	limma	3	0.136283	0.664693	0.569266	0.857339	0.661489	0.382642	0.334518	0.386094	0.666336	0.618304	0.622503	0.655621	0.935791	1	1	0	0	0	0	0.368841	0	0.38992
DDA_maxlfq_top0_count	9	DDA	FragPipe	limma	3	0.736389	0.774713	0.602527	0.88839	0.637446	0.785843	0.999646	0.771655	0.738355	0.917544	0.508333	0.769331	0.965378	0	1	0	0	0	1	0	0.722843	0.200892
DDA_maxlfq_top3_count	9	DDA	FragPipe	limma	3	0.786343	0.774109	0.552072	0.891729	0.634942	0.7968	0.999538	0.821157	0.737694	0.92854	0.564544	0.769331	0.967135	0	1	0	1	0	0	0.00661496	0.762181	0.23852
DDA_top0_top3_count	9	DDA	FragPipe	limma	3	0.472273	0.310298	0.828222	0.363455	0.0589523	0.652511	0.99588	0.641239	0.280476	0.597603	0.15704	0.216374	0.885268	0	1	1	0	0	0	0	0.722843	0.611098
DDA_dlfq_maxlfq_top0_top3	9	DDA	FragPipe	limma	4	0.26819	0.505468	0.434026	0.837667	0.460733	0.440324	0.409006	0.397695	0.507598	0.634318	0.424903	0.506173	0.938037	1	0	0	0	0	0	0.368841	0	0.843778
DDA_dlfq_maxlfq_top0_count	9	DDA	FragPipe	limma	4	0.569276	0.63634	0.50262	0.97377	0.461569	0.714673	0.999899	0.667206	0.610175	0.849392	0.347715	0.615335	0.947193	0	0	0	0	0	1	0	0.722843	0.758032
DDA_dlfq_maxlfq_top3_count	9	DDA	FragPipe	limma	4	0.596403	0.636793	0.495844	0.982982	0.459648	0.722067	0.999794	0.695672	0.61001	0.858126	0.3797	0.615497	0.952139	0	0	0	1	0	0	0.000456211	0.774251	0.855022
DDA_dlfq_top0_top3_count	9	DDA	FragPipe	limma	4	0.551555	0.253001	0.69939	0.464132	0.0517176	0.678843	0.99732	0.660382	0.228444	0.628582	0.124545	0.181774	0.874298	0	0	1	0	0	0	0	0.722843	1
DDA_maxlfq_top0_top3_count	9	DDA	FragPipe	limma	4	0.450269	0.630953	0.638022	0.93913	0.498207	0.654449	0.999811	0.655036	0.605715	0.765498	0.463105	0.602664	1	0	1	0	0	0	0	0	0.722843	0.580765
DDA_dlfq_maxlfq_top0_top3_count	9	DDA	FragPipe	limma	5	0.485851	0.532511	0.55398	1	0.386375	0.642071	1	0.615198	0.512389	0.747183	0.347994	0.504288	0.998235	0	0	0	0	0	0	0	0.722843	0.935331
DDA_dlfq_maxlfq	9	DDA	FragPipe	ROTS	2	0	0.952281	0	0.969033	0.741056	0.378494	0.257351	0.148248	0.960357	0.843022	0.339405	0.98538	0.13518	1	0	0	1	0	1	0.527372	0.00447028	0.306297
DDA_dlfq_top0	9	DDA	FragPipe	ROTS	2	0.452318	0.0409613	0.392823	0.112227	0.0214463	0.552011	0	0.469258	0.0426165	0.46802	0.107541	0.0419103	0.361966	1	0	1	0	0	1	0.368841	0	0.522143
DDA_dlfq_top3	9	DDA	FragPipe	ROTS	2	0.497493	0.0454894	0.503536	0.129039	0.0174298	0.563511	0.0269119	0.480054	0.0436075	0.485388	0.11336	0.042885	0.333758	1	0	1	1	0	0	0.374772	0.0406795	0.670415
DDA_dlfq_count	9	DDA	FragPipe	ROTS	2	1	0.500662	0.815315	0.289672	0.0945727	1	0.993634	0.973127	0.443013	0.90536	0.0975671	0.356725	0	0	0	1	1	0	1	0.0193887	1	0.640693
DDA_maxlfq_top0	9	DDA	FragPipe	ROTS	2	0.365485	1	0.684385	0.982028	1	0.571082	0.251642	0.451712	1	0.832476	0.689506	0.983431	0.817361	1	1	0	0	0	1	0.368841	0	0.242616
DDA_maxlfq_top3	9	DDA	FragPipe	ROTS	2	0.399391	0.994079	0.535883	0.989188	0.984466	0.576844	0.247609	0.459631	0.999009	0.841595	0.770015	0.983431	0.824928	1	1	0	1	0	0	0.39188	0.00715243	0.0261583
DDA_maxlfq_count	9	DDA	FragPipe	ROTS	2	0.977115	0.860745	0.123195	0.219625	0.827921	0.821234	0.999208	0.833169	0.793855	0.970472	0.302064	1	0.169151	0	1	0	1	0	1	1	0.343317	0.0277295
DDA_top0_top3	9	DDA	FragPipe	ROTS	2	0.0434982	0	0.48753	0	0	0	0.00633482	0	0	0	0	0	0.515196	1	1	1	0	0	0	0.368841	0	0.736762
DDA_top0_count	9	DDA	FragPipe	ROTS	2	0.824757	0.463393	1	0.296227	0.0844176	0.965214	0.992901	0.884322	0.421209	0.84475	0.315581	0.324561	0.00708839	0	1	1	0	0	1	0	0.722843	0.706193
DDA_top3_count	9	DDA	FragPipe	ROTS	2	0.938847	0.467503	0.997137	0.299058	0.0924394	0.99232	0.993298	0.999168	0.420218	0.869093	0.365077	0.324561	0.020903	0	1	1	1	0	0	0.00661496	0.762181	0.64367
DDA_dlfq_maxlfq_top0	9	DDA	FragPipe	ROTS	3	0.297407	0.664414	0.359069	0.918524	0.587501	0.500529	0.353375	0.356406	0.667658	0.714506	0.378817	0.67024	0.601415	1	0	0	0	0	1	0.368841	0	0.775929
DDA_dlfq_maxlfq_top3	9	DDA	FragPipe	ROTS	3	0.317599	0.66395	0.346473	0.927923	0.580984	0.506283	0.336689	0.362644	0.667658	0.723335	0.407593	0.670565	0.616185	1	0	0	1	0	0	0.374772	0.0406795	0.359238
DDA_dlfq_maxlfq_count	9	DDA	FragPipe	ROTS	3	0.715391	0.77123	0.312837	0.880436	0.554517	0.733243	0.999638	0.651515	0.732408	0.906285	0.246345	0.780702	0.258174	0	0	0	1	0	1	0.0193887	1	0.700605
DDA_dlfq_top0_top3	9	DDA	FragPipe	ROTS	3	0.327658	0.0288169	0.461297	0.115064	0.0129587	0.371841	0.133113	0.316437	0.0287413	0.317803	0.0736337	0.0282651	0.375248	1	0	1	0	0	0	0.368841	0	0.83757
DDA_dlfq_top0_count	9	DDA	FragPipe	ROTS	3	0.683974	0.335005	0.736046	0.424178	0.0668122	0.839075	0.996154	0.775569	0.302279	0.739377	0.173563	0.241066	0.315246	0	0	1	0	0	1	0	0.722843	0.754615
DDA_dlfq_top3_count	9	DDA	FragPipe	ROTS	3	0.730468	0.337885	0.771996	0.435187	0.0681473	0.851944	0.996111	0.81745	0.302279	0.75328	0.192001	0.241391	0.283062	0	0	1	1	0	0	0.000456211	0.774251	0.845348
DDA_maxlfq_top0_top3	9	DDA	FragPipe	ROTS	3	0.136283	0.664693	0.569266	0.857339	0.661489	0.382642	0.334518	0.303781	0.666336	0.558024	0.486507	0.655621	0.932099	1	1	0	0	0	0	0.368841	0	0.414993
DDA_maxlfq_top0_count	9	DDA	FragPipe	ROTS	3	0.736389	0.774713	0.602527	0.88839	0.637446	0.785843	0.999646	0.723068	0.738355	0.882566	0.435717	0.769331	0.755881	0	1	0	0	0	1	0	0.722843	0.334822
DDA_maxlfq_top3_count	9	DDA	FragPipe	ROTS	3	0.786343	0.774109	0.552072	0.891729	0.634942	0.7968	0.999538	0.76399	0.737694	0.89372	0.479052	0.769331	0.763546	0	1	0	1	0	0	0.00661496	0.762181	0.430483
DDA_top0_top3_count	9	DDA	FragPipe	ROTS	3	0.472273	0.310298	0.828222	0.363455	0.0589523	0.652511	0.99588	0.62783	0.280476	0.571281	0.226886	0.216374	0.388899	0	1	1	0	0	0	0	0.722843	0.789118
DDA_dlfq_maxlfq_top0_top3	9	DDA	FragPipe	ROTS	4	0.26819	0.505468	0.434026	0.837667	0.460733	0.440324	0.409006	0.334817	0.507598	0.578417	0.336638	0.506173	0.781399	1	0	0	0	0	0	0.368841	0	0.821706
DDA_dlfq_maxlfq_top0_count	9	DDA	FragPipe	ROTS	4	0.569276	0.63634	0.50262	0.97377	0.461569	0.714673	0.999899	0.626639	0.610175	0.810683	0.308611	0.615335	0.550614	0	0	0	0	0	1	0	0.722843	0.980541
DDA_dlfq_maxlfq_top3_count	9	DDA	FragPipe	ROTS	4	0.596403	0.636793	0.495844	0.982982	0.459648	0.722067	0.999794	0.6489	0.61001	0.819155	0.331248	0.615497	0.562965	0	0	0	1	0	0	0.000456211	0.774251	0.774614
DDA_dlfq_top0_top3_count	9	DDA	FragPipe	ROTS	4	0.551555	0.253001	0.69939	0.464132	0.0517176	0.678843	0.99732	0.634321	0.228444	0.595435	0.166521	0.181774	0.339884	0	0	1	0	0	0	0	0.722843	0.906896
DDA_maxlfq_top0_top3_count	9	DDA	FragPipe	ROTS	4	0.450269	0.630953	0.638022	0.93913	0.498207	0.654449	0.999811	0.604667	0.605715	0.726398	0.40704	0.602664	0.908615	0	1	0	0	0	0	0	0.722843	0.358319
DDA_dlfq_maxlfq_top0_top3_count	9	DDA	FragPipe	ROTS	5	0.485851	0.532511	0.55398	1	0.386375	0.642071	1	0.569869	0.512389	0.706018	0.310012	0.504288	0.739523	0	0	0	0	0	0	0	0.722843	0.90128
DDA_dlfq_maxlfq	10	DDA	FragPipe	limma	2	0	0.939216	0.0678596	0.972817	0.523666	0.340454	0.141319	0.139972	0.956921	0.737217	0.754849	0.912653	0.670868	1	0	0	1	0	1	0.841508	0.013222	0.21662
DDA_dlfq_top0	10	DDA	FragPipe	limma	2	0.467446	0.0634814	0.030151	0.157813	0.00208613	0.401712	0	0.395483	0.0480226	0.434125	0.0506439	0.0423892	0.587977	1	0	1	0	0	1	0.647859	0.00487127	0.970836
DDA_dlfq_top3	10	DDA	FragPipe	limma	2	0.509412	0.0669492	0.238863	0.176255	0	0.417806	0.034725	0.420307	0.0487288	0.445657	0.00797459	0.0449582	0.586276	1	0	1	1	0	0	0.65353	0.0243563	0.964058
DDA_dlfq_count	10	DDA	FragPipe	limma	2	1	0.69213	0.929907	0.313479	0.480476	0.970843	0.995505	0.986244	0.716808	0.981449	0.378319	0.547848	0.560343	0	0	1	1	0	1	0.0379926	0.999304	0.493759
DDA_maxlfq_top0	10	DDA	FragPipe	limma	2	0.400773	1	0.383137	0.992425	0.710794	0.523008	0.134083	0.41818	1	0.850593	1	0.909441	0.489441	1	1	0	0	0	1	0.651829	0	0.173388
DDA_maxlfq_top3	10	DDA	FragPipe	limma	2	0.418848	0.995376	0	1	0.647917	0.537103	0.151995	0.431235	0.996469	0.848731	0.926759	0.910084	0.488913	1	1	0	1	0	0	0.669407	0.00487127	0
DDA_maxlfq_count	10	DDA	FragPipe	limma	2	0.980784	0.977651	0.47073	0.300238	1	0.892525	0.999981	0.918432	0.756356	0.978937	0.919591	1	0.448533	0	1	0	1	0	1	1	0.346555	0.180354
DDA_top0_top3	10	DDA	FragPipe	limma	2	0.127117	0	0.196497	0	0.00864546	0	0.0205875	0.123934	0	0.1629	0	0	0.750044	1	1	1	0	0	0	0.651829	0	0.712656
DDA_top0_count	10	DDA	FragPipe	limma	2	0.937516	0.647144	1	0.32836	0.41775	0.977685	0.994685	0.934883	0.707627	0.992873	0.70323	0.520873	0.813785	0	1	1	0	0	1	0.00396939	0.795059	0.60067
DDA_top3_count	10	DDA	FragPipe	limma	2	0.999196	0.651768	0.993549	0.333741	0.493292	1	0.994846	1	0.709746	1	0.507285	0.524085	0.810126	0	1	1	1	0	0	0.00793876	0.816632	0.619153
DDA_dlfq_maxlfq_top0	10	DDA	FragPipe	limma	3	0.273982	0.667566	0.160382	0.940418	0.412182	0.421724	0.199713	0.317878	0.668314	0.673978	0.601831	0.621494	0.473156	1	0	0	0	0	1	0.647859	0.00487127	0.529949
DDA_dlfq_maxlfq_top3	10	DDA	FragPipe	limma	3	0.292132	0.66718	0.102241	0.95314	0.390528	0.431788	0.216407	0.330505	0.667373	0.677202	0.563194	0.622565	0.472457	1	0	0	1	0	0	0.65353	0.0243563	0.501746
DDA_dlfq_maxlfq_count	10	DDA	FragPipe	limma	3	0.665723	0.869666	0.489499	0.908528	0.668047	0.734607	1	0.681549	0.810028	0.899201	0.684253	0.820167	0.464001	0	0	0	1	0	1	0.0374256	1	0.291313
DDA_dlfq_top0_top3	10	DDA	FragPipe	limma	3	0.361279	0.0434769	0.15517	0.156833	0.0035772	0.273173	0.125117	0.313241	0.0322505	0.347561	0.0195395	0.0291158	0.809836	1	0	1	0	0	0	0.647859	0.00487127	0.988815
DDA_dlfq_top0_count	10	DDA	FragPipe	limma	3	0.71181	0.467585	0.653353	0.442314	0.300104	0.783413	0.996404	0.772203	0.490819	0.802815	0.377398	0.37037	0.871857	0	0	1	0	0	1	0	0.79993	0.765167
DDA_dlfq_top3_count	10	DDA	FragPipe	limma	3	0.744207	0.470282	0.720773	0.455468	0.324589	0.796216	0.995923	0.802184	0.491761	0.809035	0.29786	0.372297	0.868886	0	0	1	1	0	0	0	0.826374	0.593454
DDA_maxlfq_top0_top3	10	DDA	FragPipe	limma	3	0.199958	0.665125	0.193211	0.868185	0.455786	0.35337	0.210488	0.32445	0.66549	0.620742	0.642253	0.606508	0.753732	1	1	0	0	0	0	0.651829	0	0.131729
DDA_maxlfq_top0_count	10	DDA	FragPipe	limma	3	0.769574	0.874932	0.617955	0.925036	0.709515	0.797739	0.999938	0.757165	0.821328	0.940801	0.874274	0.810105	0.812204	0	1	0	0	0	1	0.00396939	0.795059	0.264606
DDA_maxlfq_top3_count	10	DDA	FragPipe	limma	3	0.795014	0.874932	0.488093	0.929615	0.713736	0.809876	0.999541	0.783222	0.820857	0.942556	0.784545	0.811389	0.809156	0	1	0	1	0	0	0.00765524	0.81698	0.160576
DDA_top0_top3_count	10	DDA	FragPipe	limma	3	0.549508	0.43297	0.730015	0.36294	0.306563	0.659228	0.995637	0.686272	0.472458	0.718591	0.403505	0.348319	0.930951	0	1	1	0	0	0	0.00396939	0.795059	0.586871
DDA_dlfq_maxlfq_top0_top3	10	DDA	FragPipe	limma	4	0.278308	0.510837	0.152751	0.851881	0.315518	0.370014	0.268303	0.321518	0.508357	0.579871	0.456704	0.469921	0.798996	1	0	0	0	0	0	0.647859	0.00487127	0.390575
DDA_dlfq_maxlfq_top0_count	10	DDA	FragPipe	limma	4	0.562654	0.719937	0.480297	0.988002	0.522462	0.684371	0.999719	0.632199	0.697622	0.829199	0.634439	0.655534	0.836206	0	0	0	0	0	1	0	0.79993	0.566941
DDA_dlfq_maxlfq_top3_count	10	DDA	FragPipe	limma	4	0.580769	0.720515	0.450151	0.998059	0.524225	0.693122	0.999249	0.649365	0.697505	0.831998	0.582463	0.656605	0.83416	0	0	0	1	0	0	0	0.826374	0.473692
DDA_dlfq_top0_top3_count	10	DDA	FragPipe	limma	4	0.587683	0.353579	0.564828	0.46781	0.233708	0.628008	0.995707	0.643475	0.371822	0.669501	0.274576	0.280026	0.967127	0	0	1	0	0	0	0	0.79993	0.661302
DDA_maxlfq_top0_top3_count	10	DDA	FragPipe	limma	4	0.502978	0.71199	0.507319	0.942916	0.5464	0.655053	0.99918	0.637777	0.695033	0.805672	0.676144	0.64408	0.937032	0	1	0	0	0	0	0.00396939	0.795059	0.137091
DDA_dlfq_maxlfq_top0_top3_count	10	DDA	FragPipe	limma	5	0.499734	0.603372	0.431069	0.990138	0.428463	0.606114	0.998726	0.576867	0.594068	0.743248	0.524865	0.541233	0.969978	0	0	0	0	0	0	0	0.79993	0.682021
DDA_dlfq_maxlfq	10	DDA	FragPipe	ROTS	2	0	0.939216	0.0678596	0.972817	0.523666	0.340454	0.141319	0.0118173	0.956921	0.534374	0.595511	0.912653	0.897189	1	0	0	1	0	1	0.841508	0.013222	0.284131
DDA_dlfq_top0	10	DDA	FragPipe	ROTS	2	0.467446	0.0634814	0.030151	0.157813	0.00208613	0.401712	0	0.245778	0.0480226	0.272819	0.0669335	0.0423892	0.647798	1	0	1	0	0	1	0.647859	0.00487127	0.971719
DDA_dlfq_top3	10	DDA	FragPipe	ROTS	2	0.509412	0.0669492	0.238863	0.176255	0	0.417806	0.034725	0.253108	0.0487288	0.254348	0.0153798	0.0449582	0.637673	1	0	1	1	0	0	0.65353	0.0243563	1
DDA_dlfq_count	10	DDA	FragPipe	ROTS	2	1	0.69213	0.929907	0.313479	0.480476	0.970843	0.995505	0.91247	0.716808	0.888054	0.535221	0.547848	0	0	0	1	1	0	1	0.0379926	0.999304	0.628914
DDA_maxlfq_top0	10	DDA	FragPipe	ROTS	2	0.400773	1	0.383137	0.992425	0.710794	0.523008	0.134083	0.234905	1	0.6719	0.652846	0.909441	0.790868	1	1	0	0	0	1	0.651829	0	0.00967812
DDA_maxlfq_top3	10	DDA	FragPipe	ROTS	2	0.418848	0.995376	0	1	0.647917	0.537103	0.151995	0.218242	0.996469	0.639942	0.631824	0.910084	0.790763	1	1	0	1	0	0	0.669407	0.00487127	0.136028
DDA_maxlfq_count	10	DDA	FragPipe	ROTS	2	0.980784	0.977651	0.47073	0.300238	1	0.892525	0.999981	0.797558	0.756356	0.844378	0.331098	1	0.143517	0	1	0	1	0	1	1	0.346555	0.0952982
DDA_top0_top3	10	DDA	FragPipe	ROTS	2	0.127117	0	0.196497	0	0.00864546	0	0.0205875	0	0	0	0.00310049	0	0.665519	1	1	1	0	0	0	0.651829	0	0.928854
DDA_top0_count	10	DDA	FragPipe	ROTS	2	0.937516	0.647144	1	0.32836	0.41775	0.977685	0.994685	0.893513	0.707627	0.932547	0.751448	0.520873	0.0657409	0	1	1	0	0	1	0.00396939	0.795059	0.657689
DDA_top3_count	10	DDA	FragPipe	ROTS	2	0.999196	0.651768	0.993549	0.333741	0.493292	1	0.994846	0.974182	0.709746	0.930625	0.604235	0.524085	0.0849905	0	1	1	1	0	0	0.00793876	0.816632	0.535446
DDA_dlfq_maxlfq_top0	10	DDA	FragPipe	ROTS	3	0.273982	0.667566	0.160382	0.940418	0.412182	0.421724	0.199713	0.164167	0.668314	0.493031	0.43843	0.621494	1	1	0	0	0	0	1	0.647859	0.00487127	0.663397
DDA_dlfq_maxlfq_top3	10	DDA	FragPipe	ROTS	3	0.292132	0.66718	0.102241	0.95314	0.390528	0.431788	0.216407	0.161056	0.667373	0.476221	0.414238	0.622565	0.997839	1	0	0	1	0	0	0.65353	0.0243563	0.716714
DDA_dlfq_maxlfq_count	10	DDA	FragPipe	ROTS	3	0.665723	0.869666	0.489499	0.908528	0.668047	0.734607	1	0.573948	0.810028	0.755602	0.487277	0.820167	0.79677	0	0	0	1	0	1	0.0374256	1	0.18854
DDA_dlfq_top0_top3	10	DDA	FragPipe	ROTS	3	0.361279	0.0434769	0.15517	0.156833	0.0035772	0.273173	0.125117	0.166295	0.0322505	0.175722	0.0284713	0.0291158	0.644396	1	0	1	0	0	0	0.647859	0.00487127	0.855007
DDA_dlfq_top0_count	10	DDA	FragPipe	ROTS	3	0.71181	0.467585	0.653353	0.442314	0.300104	0.783413	0.996404	0.68392	0.490819	0.697807	0.451201	0.37037	0.54294	0	0	1	0	0	1	0	0.79993	0.367122
DDA_dlfq_top3_count	10	DDA	FragPipe	ROTS	3	0.744207	0.470282	0.720773	0.455468	0.324589	0.796216	0.995923	0.713253	0.491761	0.691009	0.384945	0.372297	0.543041	0	0	1	1	0	0	0	0.826374	0.758241
DDA_maxlfq_top0_top3	10	DDA	FragPipe	ROTS	3	0.199958	0.665125	0.193211	0.868185	0.455786	0.35337	0.210488	0.151049	0.66549	0.437281	0.429257	0.606508	0.774577	1	1	0	0	0	0	0.651829	0	0.0426823
DDA_maxlfq_top0_count	10	DDA	FragPipe	ROTS	3	0.769574	0.874932	0.617955	0.925036	0.709515	0.797739	0.999938	0.641992	0.821328	0.816275	0.578464	0.810105	0.649039	0	1	0	0	0	1	0.00396939	0.795059	0.286884
DDA_maxlfq_top3_count	10	DDA	FragPipe	ROTS	3	0.795014	0.874932	0.488093	0.929615	0.713736	0.809876	0.999541	0.663327	0.820857	0.804982	0.522386	0.811389	0.657859	0	1	0	1	0	0	0.00765524	0.81698	0.277944
DDA_top0_top3_count	10	DDA	FragPipe	ROTS	3	0.549508	0.43297	0.730015	0.36294	0.306563	0.659228	0.995637	0.622565	0.472458	0.621057	0.452928	0.348319	0.621993	0	1	1	0	0	0	0.00396939	0.795059	0.741028
DDA_dlfq_maxlfq_top0_top3	10	DDA	FragPipe	ROTS	4	0.278308	0.510837	0.152751	0.851881	0.315518	0.370014	0.268303	0.160642	0.508357	0.395564	0.327599	0.469921	0.973892	1	0	0	0	0	0	0.647859	0.00487127	0.675303
DDA_dlfq_maxlfq_top0_count	10	DDA	FragPipe	ROTS	4	0.562654	0.719937	0.480297	0.988002	0.522462	0.684371	0.999719	0.516007	0.697622	0.690679	0.488843	0.655534	0.995788	0	0	0	0	0	1	0	0.79993	0.720331
DDA_dlfq_maxlfq_top3_count	10	DDA	FragPipe	ROTS	4	0.580769	0.720515	0.450151	0.998059	0.524225	0.693122	0.999249	0.527896	0.697505	0.681954	0.452212	0.656605	0.993573	0	0	0	1	0	0	0	0.826374	0.725195
DDA_dlfq_top0_top3_count	10	DDA	FragPipe	ROTS	4	0.587683	0.353579	0.564828	0.46781	0.233708	0.628008	0.995707	0.546508	0.371822	0.546399	0.329386	0.280026	0.642475	0	0	1	0	0	0	0	0.79993	0.774095
DDA_maxlfq_top0_top3_count	10	DDA	FragPipe	ROTS	4	0.502978	0.71199	0.507319	0.942916	0.5464	0.655053	0.99918	0.519733	0.695033	0.669899	0.495759	0.64408	0.767254	0	1	0	0	0	0	0.00396939	0.795059	0.270225
DDA_dlfq_maxlfq_top0_top3_count	10	DDA	FragPipe	ROTS	5	0.499734	0.603372	0.431069	0.990138	0.428463	0.606114	0.998726	0.454157	0.594068	0.596899	0.41876	0.541233	0.975131	0	0	0	0	0	0	0	0.79993	0.709237
DDA_dlfq_maxlfq	11	DDA	FragPipe	limma	2	0	0.957585	0.421127	0.611009	0.543194	0.304964	0.103467	0.208138	0.966644	0.789039	0.0589504	0.805229	0.910125	1	0	0	1	0	1	0.229229	0.00769769	0.289949
DDA_dlfq_top0	11	DDA	FragPipe	limma	2	0.492728	0.0417735	0.0162	0.0624997	0	0.317391	0	0.490766	0.0266845	0.51679	0.352171	0.0213447	0.169003	1	0	1	0	0	1	0.0948725	0.0573828	0.709081
DDA_dlfq_top3	11	DDA	FragPipe	limma	2	0.467566	0.0253205	0.376987	0.0301724	0.0412103	0.307883	0.0650461	0.530746	0.012008	0.580963	0.116408	0.0186766	0.172892	1	0	1	1	0	0	0.119825	0.013296	0.63355
DDA_dlfq_count	11	DDA	FragPipe	limma	2	1	0.592842	0.982802	0.57775	0.698356	0.993369	0.996731	0.944829	0.873916	0.986492	0.260222	0.707044	0.210542	0	0	1	1	0	1	0.024952	0.529041	0.719819
DDA_maxlfq_top0	11	DDA	FragPipe	limma	2	0.429928	1	0.541886	0.63408	0.712998	0.525835	0.108636	0.44796	1	0.771347	0.753607	0.804696	0.0143035	1	1	0	0	0	1	0.117357	0	0.110928
DDA_maxlfq_top3	11	DDA	FragPipe	limma	2	0.440671	1	0	0.635128	0.591438	0.537328	0.156229	0.518439	0.995997	0.827985	0.392782	0.806297	0	1	1	0	1	0	0	0.121196	0.00979708	0.143378
DDA_maxlfq_count	11	DDA	FragPipe	limma	2	0.971528	0.808761	0.808008	0.532018	1	0.948532	1	0.931839	0.621081	1	0.452677	1	0.143383	0	1	0	1	0	1	1	1	0.174603
DDA_top0_top3	11	DDA	FragPipe	limma	2	0.192758	0	0.440254	0	0.0715902	0	0.0585379	0.237182	0	0.258299	0.0315952	0	0.683214	1	1	1	0	0	0	0.0948725	0.0573828	0.524348
DDA_top0_count	11	DDA	FragPipe	limma	2	0.937464	0.549573	1	0.603772	0.57619	0.980596	0.995415	0.886918	0.888592	0.921862	0.485885	0.699039	0.19198	0	1	1	0	0	1	0.0230326	0.240728	0.470784
DDA_top3_count	11	DDA	FragPipe	limma	2	0.995911	0.557692	0.994708	0.60838	0.778367	1	0.997003	1	0.888592	0.981686	0.347701	0.702241	0.204393	0	1	1	1	0	0	0.0164519	0.277117	0.509699
DDA_dlfq_maxlfq_top0	11	DDA	FragPipe	limma	3	0.299015	0.666453	0.326404	0.662589	0.41873	0.38273	0.219736	0.382288	0.664443	0.692392	0.388243	0.543757	0.616806	1	0	0	0	0	1	0.0948725	0.0573828	0.740436
DDA_dlfq_maxlfq_top3	11	DDA	FragPipe	limma	3	0.291846	0.660969	0.266038	0.646638	0.391947	0.383391	0.266477	0.419108	0.658217	0.732662	0.18938	0.543401	0.428749	1	0	0	1	0	0	0.117083	0.0202939	0.650214
DDA_dlfq_maxlfq_count	11	DDA	FragPipe	limma	3	0.639263	0.786396	0.737312	0.938507	0.747183	0.748955	0.99947	0.694935	0.820547	0.925177	0.257283	0.837424	0.654592	0	0	0	1	0	1	0.0244036	0.530441	0.407694
DDA_dlfq_top0_top3	11	DDA	FragPipe	limma	3	0.381751	0.0223647	0.277814	0.0662411	0.0376002	0.208425	0.185379	0.419565	0.0128975	0.452017	0.166725	0.0133404	0.828805	1	0	1	0	0	0	0.0932273	0.0615815	0.791678
DDA_dlfq_top0_count	11	DDA	FragPipe	limma	3	0.71739	0.394729	0.666334	0.63936	0.424849	0.763786	0.994852	0.774171	0.596398	0.808381	0.366093	0.475809	0.208304	0	0	1	0	0	1	0.00164519	0.295311	0.783924
DDA_dlfq_top3_count	11	DDA	FragPipe	limma	3	0.724097	0.391952	0.784833	0.621834	0.505978	0.767084	0.995765	0.825192	0.591505	0.849714	0.241444	0.475987	0.283712	0	0	1	1	0	0	0.0134357	0.284815	0.938455
DDA_maxlfq_top0_top3	11	DDA	FragPipe	limma	3	0.253022	0.666667	0.32738	0.651835	0.458675	0.354388	0.271111	0.401194	0.665332	0.61921	0.392661	0.536997	0.629367	1	1	0	0	0	0	0.0948725	0.0573828	0.223527
DDA_maxlfq_top0_count	11	DDA	FragPipe	limma	3	0.75829	0.786111	0.783298	0.950514	0.763062	0.818321	0.99938	0.755572	0.836558	0.897736	0.564056	0.834578	0.0451216	0	1	0	0	0	1	0.0230326	0.240728	0.0438408
DDA_maxlfq_top3_count	11	DDA	FragPipe	limma	3	0.781604	0.788818	0.600905	0.953397	0.789935	0.82862	0.999354	0.816759	0.835223	0.936557	0.39772	0.836179	0.111932	0	1	0	1	0	0	0.0159035	0.278516	0.155241
DDA_top0_top3_count	11	DDA	FragPipe	limma	3	0.555729	0.369088	0.811654	0.630319	0.475382	0.660199	0.995042	0.708033	0.592395	0.720616	0.288394	0.467094	0.623261	0	1	1	0	0	0	0.00164519	0.295311	0.547682
DDA_dlfq_maxlfq_top0_top3	11	DDA	FragPipe	limma	4	0.304969	0.504113	0.299409	0.60658	0.326738	0.332234	0.359921	0.405539	0.500222	0.624071	0.284252	0.409374	0.48613	1	0	0	0	0	0	0.0932273	0.0615815	0.707997
DDA_dlfq_maxlfq_top0_count	11	DDA	FragPipe	limma	4	0.567641	0.658422	0.628337	0.994464	0.588456	0.678448	0.998246	0.651742	0.729486	0.830922	0.393919	0.672892	0.25911	0	0	0	0	0	1	0.00164519	0.295311	0.555642
DDA_dlfq_maxlfq_top3_count	11	DDA	FragPipe	limma	4	0.571439	0.657033	0.597272	0.983573	0.608761	0.682013	0.998154	0.688998	0.726373	0.861028	0.271457	0.673248	0.165522	0	0	0	1	0	0	0.0128873	0.286214	0.669282
DDA_dlfq_top0_top3_count	11	DDA	FragPipe	limma	4	0.592705	0.294533	0.635159	0.646241	0.360952	0.599873	0.991779	0.68174	0.448299	0.707682	0.265664	0.358058	0.680398	0	0	1	0	0	0	0	0.29951	1
DDA_maxlfq_top0_top3_count	11	DDA	FragPipe	limma	4	0.515342	0.652671	0.630809	0.993232	0.621764	0.665382	0.997976	0.67039	0.732377	0.79353	0.410708	0.668712	0.544799	0	1	0	0	0	0	0.00164519	0.295311	0.127388
DDA_dlfq_maxlfq_top0_top3_count	11	DDA	FragPipe	limma	5	0.50909	0.553355	0.558197	1	0.501334	0.59159	0.995439	0.619682	0.627352	0.763446	0.3252	0.556457	0.418159	0	0	0	0	0	0	0	0.29951	0.99978
DDA_dlfq_maxlfq	11	DDA	FragPipe	ROTS	2	0	0.957585	0.421127	0.611009	0.543194	0.304964	0.103467	0	0.966644	0.562419	0.152963	0.805229	0.792786	1	0	0	1	0	1	0.229229	0.00769769	0.0745957
DDA_dlfq_top0	11	DDA	FragPipe	ROTS	2	0.492728	0.0417735	0.0162	0.0624997	0	0.317391	0	0.207424	0.0266845	0.26235	0.220356	0.0213447	0.292257	1	0	1	0	0	1	0.0948725	0.0573828	0.704368
DDA_dlfq_top3	11	DDA	FragPipe	ROTS	2	0.467566	0.0253205	0.376987	0.0301724	0.0412103	0.307883	0.0650461	0.227107	0.012008	0.334975	0.0855085	0.0186766	0.11929	1	0	1	1	0	0	0.119825	0.013296	0.692913
DDA_dlfq_count	11	DDA	FragPipe	ROTS	2	1	0.592842	0.982802	0.57775	0.698356	0.993369	0.996731	0.847627	0.873916	0.924245	0.324797	0.707044	0.47399	0	0	1	1	0	1	0.024952	0.529041	0.665502
DDA_maxlfq_top0	11	DDA	FragPipe	ROTS	2	0.429928	1	0.541886	0.63408	0.712998	0.525835	0.108636	0.201169	1	0.574397	0.703008	0.804696	0.409869	1	1	0	0	0	1	0.117357	0	0.0815272
DDA_maxlfq_top3	11	DDA	FragPipe	ROTS	2	0.440671	1	0	0.635128	0.591438	0.537328	0.156229	0.227478	0.995997	0.633994	0.473597	0.806297	0.277942	1	1	0	1	0	0	0.121196	0.00979708	0
DDA_maxlfq_count	11	DDA	FragPipe	ROTS	2	0.971528	0.808761	0.808008	0.532018	1	0.948532	1	0.833401	0.621081	0.947255	0.174538	1	0.582014	0	1	0	1	0	1	1	1	0.0767359
DDA_top0_top3	11	DDA	FragPipe	ROTS	2	0.192758	0	0.440254	0	0.0715902	0	0.0585379	0.0364939	0	0	0	0	0.5794	1	1	1	0	0	0	0.0948725	0.0573828	0.482114
DDA_top0_count	11	DDA	FragPipe	ROTS	2	0.937464	0.549573	1	0.603772	0.57619	0.980596	0.995415	0.819418	0.888592	0.875576	1	0.699039	0.554414	0	1	1	0	0	1	0.0230326	0.240728	0.0793544
DDA_top3_count	11	DDA	FragPipe	ROTS	2	0.995911	0.557692	0.994708	0.60838	0.778367	1	0.997003	0.913306	0.888592	0.928611	0.729518	0.702241	0.574833	0	1	1	1	0	0	0.0164519	0.277117	0.12285
DDA_dlfq_maxlfq_top0	11	DDA	FragPipe	ROTS	3	0.299015	0.666453	0.326404	0.662589	0.41873	0.38273	0.219736	0.136198	0.664443	0.466389	0.358776	0.543757	0.993187	1	0	0	0	0	1	0.0948725	0.0573828	0.579501
DDA_dlfq_maxlfq_top3	11	DDA	FragPipe	ROTS	3	0.291846	0.660969	0.266038	0.646638	0.391947	0.383391	0.266477	0.151529	0.658217	0.510463	0.237356	0.543401	0.957104	1	0	0	1	0	0	0.117083	0.0202939	0.369514
DDA_dlfq_maxlfq_count	11	DDA	FragPipe	ROTS	3	0.639263	0.786396	0.737312	0.938507	0.747183	0.748955	0.99947	0.560343	0.820547	0.811306	0.217433	0.837424	1	0	0	0	1	0	1	0.0244036	0.530441	0.34943
DDA_dlfq_top0_top3	11	DDA	FragPipe	ROTS	3	0.381751	0.0223647	0.277814	0.0662411	0.0376002	0.208425	0.185379	0.157008	0.0128975	0.199108	0.101955	0.0133404	0.279554	1	0	1	0	0	0	0.0932273	0.0615815	0.648237
DDA_dlfq_top0_count	11	DDA	FragPipe	ROTS	3	0.71739	0.394729	0.666334	0.63936	0.424849	0.763786	0.994852	0.624823	0.596398	0.68739	0.515051	0.475809	0.375957	0	0	1	0	0	1	0.00164519	0.295311	0.701962
DDA_dlfq_top3_count	11	DDA	FragPipe	ROTS	3	0.724097	0.391952	0.784833	0.621834	0.505978	0.767084	0.995765	0.66268	0.591505	0.729277	0.379941	0.475987	0.412156	0	0	1	1	0	0	0.0134357	0.284815	0.562923
DDA_maxlfq_top0_top3	11	DDA	FragPipe	ROTS	3	0.253022	0.666667	0.32738	0.651835	0.458675	0.354388	0.271111	0.155047	0.665332	0.402797	0.392201	0.536997	0.398278	1	1	0	0	0	0	0.0948725	0.0573828	0.0732485
DDA_maxlfq_top0_count	11	DDA	FragPipe	ROTS	3	0.75829	0.786111	0.783298	0.950514	0.763062	0.818321	0.99938	0.617996	0.836558	0.799076	0.625848	0.834578	0.432407	0	1	0	0	0	1	0.0230326	0.240728	0.180302
DDA_maxlfq_top3_count	11	DDA	FragPipe	ROTS	3	0.781604	0.788818	0.600905	0.953397	0.789935	0.82862	0.999354	0.658062	0.835223	0.83662	0.459218	0.836179	0.493432	0	1	0	1	0	0	0.0159035	0.278516	0.14946
DDA_top0_top3_count	11	DDA	FragPipe	ROTS	3	0.555729	0.369088	0.811654	0.630319	0.475382	0.660199	0.995042	0.589739	0.592395	0.601396	0.576506	0.467094	0.557406	0	1	1	0	0	0	0.00164519	0.295311	0.642368
DDA_dlfq_maxlfq_top0_top3	11	DDA	FragPipe	ROTS	4	0.304969	0.504113	0.299409	0.60658	0.326738	0.332234	0.359921	0.149945	0.500222	0.394689	0.272572	0.409374	0.690559	1	0	0	0	0	0	0.0932273	0.0615815	0.61682
DDA_dlfq_maxlfq_top0_count	11	DDA	FragPipe	ROTS	4	0.567641	0.658422	0.628337	0.994464	0.588456	0.678448	0.998246	0.48484	0.729486	0.69104	0.429277	0.672892	0.928935	0	0	0	0	0	1	0.00164519	0.295311	0.587491
DDA_dlfq_maxlfq_top3_count	11	DDA	FragPipe	ROTS	4	0.571439	0.657033	0.597272	0.983573	0.608761	0.682013	0.998154	0.508153	0.726373	0.721916	0.323487	0.673248	0.85253	0	0	0	1	0	0	0.0128873	0.286214	0.58724
DDA_dlfq_top0_top3_count	11	DDA	FragPipe	ROTS	4	0.592705	0.294533	0.635159	0.646241	0.360952	0.599873	0.991779	0.508563	0.448299	0.554293	0.393363	0.358058	0.739326	0	0	1	0	0	0	0	0.29951	0.705395
DDA_maxlfq_top0_top3_count	11	DDA	FragPipe	ROTS	4	0.515342	0.652671	0.630809	0.993232	0.621764	0.665382	0.997976	0.505211	0.732377	0.659972	0.513443	0.668712	0.822782	0	1	0	0	0	0	0.00164519	0.295311	0.198874
DDA_dlfq_maxlfq_top0_top3_count	11	DDA	FragPipe	ROTS	5	0.50909	0.553355	0.558197	1	0.501334	0.59159	0.995439	0.431343	0.627352	0.604382	0.386429	0.556457	0.491276	0	0	0	0	0	0	0	0.29951	0.756111
DDA_dlfq_maxlfq	0	DDA	Maxquant	limma	2	0	1	0.867997	0.68981	1	0.309868	0.193671	0.608071	1	0.892394	0.936633	0.891278	0.366143	1	0	0	1	0	1	0.0586735	0	0.58016
DDA_dlfq_top0	0	DDA	Maxquant	limma	2	0.632171	0.335987	0.870168	0.249256	0.15214	0.775333	0	0.364683	0.342246	0.328828	0.0678289	0.00238949	0.717	1	0	1	0	0	1	0.053726	0.0445063	0.886247
DDA_dlfq_top3	0	DDA	Maxquant	limma	2	0.410826	0.342203	0.873503	0.275301	0.136253	0.622874	0.0513533	0.281985	0.345811	0.437547	0.110522	0.00716846	0.045145	1	0	1	1	0	0	0.0538806	0.0431154	0.776466
DDA_dlfq_count	0	DDA	Maxquant	limma	2	1	0.768441	1	0.310362	0.329589	1	0.959836	0.811783	0.786096	0.891269	0.171422	0.583035	0	0	0	1	1	0	1	0.00185528	0.511127	0.748928
DDA_maxlfq_top0	0	DDA	Maxquant	limma	2	0.703899	0.664167	0.422997	0.651674	0.443377	0.613413	0.37543	0.853765	0.664884	0.839252	0.726321	0.891278	0.350889	1	1	0	0	0	1	0.564085	0	0.119938
DDA_maxlfq_top3	0	DDA	Maxquant	limma	2	0.532118	0.661239	0.186089	0.692934	0.424769	0.545045	0.321192	1	0.661319	0.909107	0.489013	0.891278	0.0673182	1	1	0	1	0	0	0.571119	0.023644	0.0787078
DDA_maxlfq_count	0	DDA	Maxquant	limma	2	0.909835	0.448377	0.196237	0.309748	0.358297	0.75548	0.998011	0.866953	0.404635	1	0.276118	1	0.156212	0	1	0	1	0	1	1	1	0
DDA_top0_top3	0	DDA	Maxquant	limma	2	0.0123111	0	0	0	0	0	0.0823796	0.0523096	0	0.0863596	0.00724068	0	0.299812	1	1	1	0	0	0	0.564085	0	0.71723
DDA_top0_count	0	DDA	Maxquant	limma	2	0.730144	0.428498	0.217238	0.29128	0.0151689	0.914294	0.980106	0.815988	0.445633	0.801119	0.195426	0.57945	0.42487	0	1	1	0	0	1	0.510359	0.48331	0.671487
DDA_top3_count	0	DDA	Maxquant	limma	2	0.918232	0.42783	0.197644	0.31947	0.0867784	0.953433	0.987727	0.880696	0.445633	0.89222	0.115989	0.58184	0.6302	0	1	1	1	0	0	0.515693	0.522253	0.656695
DDA_dlfq_maxlfq_top0	0	DDA	Maxquant	limma	3	0.470637	0.666718	0.720387	0.857732	0.531839	0.566205	0.304036	0.60884	0.669043	0.686825	0.576927	0.594982	0.744892	1	0	0	0	0	1	0.053726	0.0445063	0.883117
DDA_dlfq_maxlfq_top3	0	DDA	Maxquant	limma	3	0.288867	0.667814	0.64253	0.889169	0.520341	0.492596	0.285555	0.630019	0.669043	0.746349	0.512056	0.596575	0.44599	1	0	0	1	0	0	0.0538806	0.0431154	0.695709
DDA_dlfq_maxlfq_count	0	DDA	Maxquant	limma	3	0.638505	0.738939	0.688078	0.774249	0.562629	0.688449	0.996506	0.762269	0.730244	0.927888	0.461391	0.824771	0.114257	0	0	0	1	0	1	0.00185528	0.511127	0.717668
DDA_dlfq_top0_top3	0	DDA	Maxquant	limma	3	0.351447	0.226063	0.581224	0.297891	0.0961311	0.466069	0.103326	0.232993	0.229352	0.284245	0.061864	0.00318597	0.631189	1	0	1	0	0	0	0.053726	0.0445063	0.888943
DDA_dlfq_top0_count	0	DDA	Maxquant	limma	3	0.680495	0.510975	0.695802	0.58135	0.165633	0.896542	0.975739	0.664152	0.524658	0.673739	0.144892	0.388292	0.299384	0	0	1	0	0	1	0	0.527816	0.999341
DDA_dlfq_top3_count	0	DDA	Maxquant	limma	3	0.596631	0.512824	0.690382	0.608051	0.184207	0.858769	0.981609	0.658155	0.525847	0.740345	0.132645	0.390681	0.456327	0	0	1	1	0	0	0	0.527816	0.782745
DDA_maxlfq_top0_top3	0	DDA	Maxquant	limma	3	0.254645	0.441802	0.203028	0.663339	0.289382	0.386153	0.449176	0.635358	0.442068	0.611573	0.407525	0.594186	0.377222	1	1	0	0	0	0	0.564085	0	0.217186
DDA_maxlfq_top0_count	0	DDA	Maxquant	limma	3	0.754396	0.513681	0.278824	0.745849	0.272281	0.761062	0.999631	0.845569	0.505051	0.880124	0.399288	0.823576	0.234274	0	1	0	0	0	1	0.510359	0.48331	0.0850145
DDA_maxlfq_top3_count	0	DDA	Maxquant	limma	3	0.767746	0.512482	0.193323	0.781649	0.289948	0.75132	0.998976	0.915883	0.503862	0.933776	0.293707	0.824373	0.702088	0	1	0	1	0	0	0.51492	0.529207	0.0482878
DDA_top0_top3_count	0	DDA	Maxquant	limma	3	0.361748	0.285443	0.138294	0.393376	0.0339824	0.622576	0.992786	0.582998	0.297089	0.593233	0.106218	0.387097	0.778645	0	1	1	0	0	0	0.510359	0.48331	0.730962
DDA_dlfq_maxlfq_top0_top3	0	DDA	Maxquant	limma	4	0.341074	0.500599	0.536792	0.825621	0.359423	0.477756	0.364969	0.526802	0.502377	0.582248	0.389593	0.447232	0.821144	1	0	0	0	0	0	0.053726	0.0445063	0.701565
DDA_dlfq_maxlfq_top0_count	0	DDA	Maxquant	limma	4	0.593629	0.607578	0.595773	0.969482	0.383095	0.728065	0.998381	0.720207	0.607249	0.792144	0.395625	0.657905	0.476567	0	0	0	0	0	1	0	0.527816	0.682514
DDA_dlfq_maxlfq_top3_count	0	DDA	Maxquant	limma	4	0.494798	0.608015	0.553578	1	0.389281	0.697784	0.997425	0.741581	0.607249	0.83709	0.34995	0.6591	0.47916	0	0	0	1	0	0	0	0.527816	0.733256
DDA_dlfq_top0_top3_count	0	DDA	Maxquant	limma	4	0.49679	0.383826	0.526425	0.601372	0.119988	0.710989	0.987617	0.534574	0.394236	0.57289	0.111405	0.292314	0.549405	0	0	1	0	0	0	0	0.527816	0.727008
DDA_maxlfq_top0_top3_count	0	DDA	Maxquant	limma	4	0.420399	0.438352	0.203367	0.806265	0.221398	0.630278	1	0.744952	0.437017	0.754676	0.301684	0.657308	0.666658	0	1	0	0	0	0	0.510359	0.48331	0.368354
DDA_dlfq_maxlfq_top0_top3_count	0	DDA	Maxquant	limma	5	0.468725	0.507674	0.483187	0.986298	0.294637	0.648974	0.998857	0.653623	0.509626	0.70781	0.309651	0.542772	0.469744	0	0	0	0	0	0	0	0.527816	0.460816
DDA_dlfq_maxlfq	0	DDA	Maxquant	ROTS	2	0	1	0.867997	0.68981	1	0.309868	0.193671	0.541072	1	0.878521	1	0.891278	0.269657	1	0	0	1	0	1	0.0586735	0	0.508595
DDA_dlfq_top0	0	DDA	Maxquant	ROTS	2	0.632171	0.335987	0.870168	0.249256	0.15214	0.775333	0	0.295578	0.342246	0.273273	0.0714119	0.00238949	0.679592	1	0	1	0	0	1	0.053726	0.0445063	0.841206
DDA_dlfq_top3	0	DDA	Maxquant	ROTS	2	0.410826	0.342203	0.873503	0.275301	0.136253	0.622874	0.0513533	0.177659	0.345811	0.367861	0.0975743	0.00716846	0.246277	1	0	1	1	0	0	0.0538806	0.0431154	0.864246
DDA_dlfq_count	0	DDA	Maxquant	ROTS	2	1	0.768441	1	0.310362	0.329589	1	0.959836	0.805445	0.786096	0.878466	0.246434	0.583035	0.698681	0	0	1	1	0	1	0.00185528	0.511127	0.759487
DDA_maxlfq_top0	0	DDA	Maxquant	ROTS	2	0.703899	0.664167	0.422997	0.651674	0.443377	0.613413	0.37543	0.861399	0.664884	0.83137	0.759678	0.891278	0.564024	1	1	0	0	0	1	0.564085	0	0.0870792
DDA_maxlfq_top3	0	DDA	Maxquant	ROTS	2	0.532118	0.661239	0.186089	0.692934	0.424769	0.545045	0.321192	0.969918	0.661319	0.895979	0.552582	0.891278	0.521465	1	1	0	1	0	0	0.571119	0.023644	0.0556513
DDA_maxlfq_count	0	DDA	Maxquant	ROTS	2	0.909835	0.448377	0.196237	0.309748	0.358297	0.75548	0.998011	0.845998	0.404635	0.994386	0.247899	1	0.217766	0	1	0	1	0	1	1	1	0.00277449
DDA_top0_top3	0	DDA	Maxquant	ROTS	2	0.0123111	0	0	0	0	0	0.0823796	0	0	0	0	0	0.265609	1	1	1	0	0	0	0.564085	0	0.721729
DDA_top0_count	0	DDA	Maxquant	ROTS	2	0.730144	0.428498	0.217238	0.29128	0.0151689	0.914294	0.980106	0.813691	0.445633	0.783221	0.256162	0.57945	0.614386	0	1	1	0	0	1	0.510359	0.48331	0.598834
DDA_top3_count	0	DDA	Maxquant	ROTS	2	0.918232	0.42783	0.197644	0.31947	0.0867784	0.953433	0.987727	0.864692	0.445633	0.861004	0.161931	0.58184	0.420193	0	1	1	1	0	0	0.515693	0.522253	0.636288
DDA_dlfq_maxlfq_top0	0	DDA	Maxquant	ROTS	3	0.470637	0.666718	0.720387	0.857732	0.531839	0.566205	0.304036	0.566016	0.669043	0.661055	0.610363	0.594982	0.452322	1	0	0	0	0	1	0.053726	0.0445063	0.813491
DDA_dlfq_maxlfq_top3	0	DDA	Maxquant	ROTS	3	0.288867	0.667814	0.64253	0.889169	0.520341	0.492596	0.285555	0.562883	0.669043	0.71412	0.550052	0.596575	0.386975	1	0	0	1	0	0	0.0538806	0.0431154	0.907438
DDA_dlfq_maxlfq_count	0	DDA	Maxquant	ROTS	3	0.638505	0.738939	0.688078	0.774249	0.562629	0.688449	0.996506	0.730838	0.730244	0.917124	0.498111	0.824771	0.800415	0	0	0	1	0	1	0.00185528	0.511127	0.93454
DDA_dlfq_top0_top3	0	DDA	Maxquant	ROTS	3	0.351447	0.226063	0.581224	0.297891	0.0961311	0.466069	0.103326	0.157746	0.229352	0.213711	0.0563287	0.00318597	0.771563	1	0	1	0	0	0	0.053726	0.0445063	0.899183
DDA_dlfq_top0_count	0	DDA	Maxquant	ROTS	3	0.680495	0.510975	0.695802	0.58135	0.165633	0.896542	0.975739	0.638238	0.524658	0.644987	0.191336	0.388292	1	0	0	1	0	0	1	0	0.527816	0.958904
DDA_dlfq_top3_count	0	DDA	Maxquant	ROTS	3	0.596631	0.512824	0.690382	0.608051	0.184207	0.858769	0.981609	0.615932	0.525847	0.702444	0.168647	0.390681	0.753624	0	0	1	1	0	0	0	0.527816	1
DDA_maxlfq_top0_top3	0	DDA	Maxquant	ROTS	3	0.254645	0.441802	0.203028	0.663339	0.289382	0.386153	0.449176	0.610439	0.442068	0.575783	0.43742	0.594186	0.521979	1	1	0	0	0	0	0.564085	0	0.310659
DDA_maxlfq_top0_count	0	DDA	Maxquant	ROTS	3	0.754396	0.513681	0.278824	0.745849	0.272281	0.761062	0.999631	0.840363	0.505051	0.869659	0.421247	0.823576	0.737835	0	1	0	0	0	1	0.510359	0.48331	0.0510886
DDA_maxlfq_top3_count	0	DDA	Maxquant	ROTS	3	0.767746	0.512482	0.193323	0.781649	0.289948	0.75132	0.998976	0.893536	0.503862	0.917123	0.320804	0.824373	0.465934	0	1	0	1	0	0	0.51492	0.529207	0.172541
DDA_top0_top3_count	0	DDA	Maxquant	ROTS	3	0.361748	0.285443	0.138294	0.393376	0.0339824	0.622576	0.992786	0.559461	0.297089	0.548075	0.139365	0.387097	0.686293	0	1	1	0	0	0	0.510359	0.48331	0.850676
DDA_dlfq_maxlfq_top0_top3	0	DDA	Maxquant	ROTS	4	0.341074	0.500599	0.536792	0.825621	0.359423	0.477756	0.364969	0.474271	0.502377	0.541167	0.413541	0.447232	0.478859	1	0	0	0	0	0	0.053726	0.0445063	0.906093
DDA_dlfq_maxlfq_top0_count	0	DDA	Maxquant	ROTS	4	0.593629	0.607578	0.595773	0.969482	0.383095	0.728065	0.998381	0.693864	0.607249	0.773206	0.430264	0.657905	0.93445	0	0	0	0	0	1	0	0.527816	0.898706
DDA_dlfq_maxlfq_top3_count	0	DDA	Maxquant	ROTS	4	0.494798	0.608015	0.553578	1	0.389281	0.697784	0.997425	0.700797	0.607249	0.812703	0.384403	0.6591	0.859177	0	0	0	1	0	0	0	0.527816	0.868638
DDA_dlfq_top0_top3_count	0	DDA	Maxquant	ROTS	4	0.49679	0.383826	0.526425	0.601372	0.119988	0.710989	0.987617	0.492844	0.394236	0.527304	0.138919	0.292314	0.993839	0	0	1	0	0	0	0	0.527816	0.782822
DDA_maxlfq_top0_top3_count	0	DDA	Maxquant	ROTS	4	0.420399	0.438352	0.203367	0.806265	0.221398	0.630278	1	0.72595	0.437017	0.72766	0.329709	0.657308	0.795717	0	1	0	0	0	0	0.510359	0.48331	0.382085
DDA_dlfq_maxlfq_top0_top3_count	0	DDA	Maxquant	ROTS	5	0.468725	0.507674	0.483187	0.986298	0.294637	0.648974	0.998857	0.617545	0.509626	0.676408	0.339367	0.542772	0.958571	0	0	0	0	0	0	0	0.527816	0.586974
DDA_dlfq_maxlfq	1	DDA	Maxquant	limma	2	0	1	0.795856	0.514988	1	0.0265079	0.150972	0.658488	1	0.955674	0.534599	0.902732	0.617937	1	0	0	1	0	1	0.0655797	0	0.5552
DDA_dlfq_top0	1	DDA	Maxquant	limma	2	0.724174	0.313515	0.794688	0.154433	0.160772	0.793297	0	0.425049	0.333895	0.336257	0.14629	0.0174863	0.635327	1	0	1	0	0	1	0.0541524	0.0927896	0.691744
DDA_dlfq_top3	1	DDA	Maxquant	limma	2	0.439125	0.330098	0.82	0.199149	0.0929105	0.531564	0.0764672	0.0959085	0.335582	0.480153	0	0.020765	0.786607	1	0	1	1	0	0	0.0550258	0.0856974	0.660157
DDA_dlfq_count	1	DDA	Maxquant	limma	2	1	0.774131	1	0.234754	0.388104	1	0.970551	0.824202	0.768128	0.928138	0.0884347	0.567213	0.823699	0	0	1	1	0	1	0.0034937	0.504137	0.721353
DDA_maxlfq_top0	1	DDA	Maxquant	limma	2	0.707619	0.684046	0.350092	0.487844	0.466028	0.546256	0.246316	0.887843	0.696459	0.840364	1	0.902732	0.593994	1	1	0	0	0	1	0.537084	0	0.326301
DDA_maxlfq_top3	1	DDA	Maxquant	limma	2	0.5384	0.67595	0	0.541655	0.397313	0.435746	0.243345	0.881178	0.694772	0.976544	0.616364	0.903825	0.533036	1	1	0	1	0	0	0.556372	0.0585106	0.380088
DDA_maxlfq_count	1	DDA	Maxquant	limma	2	0.749482	0.456372	0.123496	0.264789	0.399355	0.610598	0.999183	0.974057	0.432546	0.999762	0.35473	1	0.411677	0	1	0	1	0	1	1	1	0.199878
DDA_top0_top3	1	DDA	Maxquant	limma	2	0.104147	0	0.0218585	0	0.0106952	0	0.0633591	0.00249046	0	0.0271529	0.0955177	0	0.643702	1	1	1	0	0	0	0.537084	0	0.496622
DDA_top0_count	1	DDA	Maxquant	limma	2	0.622874	0.447544	0.214485	0.223393	0	0.836414	0.985416	0.560713	0.44941	0.640342	0.217167	0.557377	0.720094	0	1	1	0	0	1	0.482932	0.439716	0.364399
DDA_top3_count	1	DDA	Maxquant	limma	2	0.963611	0.448227	0.19595	0.260566	0.116657	0.979438	0.991199	0.861927	0.447723	0.908748	0.0848966	0.55847	0.787832	0	1	1	1	0	0	0.495669	0.551418	0.557228
DDA_dlfq_maxlfq_top0	1	DDA	Maxquant	limma	3	0.530322	0.665854	0.646879	0.640836	0.542267	0.455354	0.206809	0.657127	0.676785	0.710765	0.560296	0.60765	0.415485	1	0	0	0	0	1	0.0541524	0.0927896	0.754922
DDA_dlfq_maxlfq_top3	1	DDA	Maxquant	limma	3	0.308572	0.668683	0.538619	0.685628	0.496741	0.331273	0.25335	0.545191	0.676785	0.804124	0.383654	0.609107	0.542871	1	0	0	1	0	0	0.0550258	0.0856974	0.752405
DDA_dlfq_maxlfq_count	1	DDA	Maxquant	limma	3	0.591931	0.743501	0.639784	0.63345	0.59582	0.545702	0.996675	0.818915	0.733558	0.961191	0.325921	0.823315	0.650828	0	0	0	1	0	1	0.0034937	0.504137	0.761953
DDA_dlfq_top0_top3	1	DDA	Maxquant	limma	3	0.424898	0.214538	0.545515	0.217816	0.0881258	0.44162	0.134179	0.174483	0.223159	0.281187	0.0806027	0.0127504	0.926238	1	0	1	0	0	0	0.0541524	0.0927896	0.87742
DDA_dlfq_top0_count	1	DDA	Maxquant	limma	3	0.726278	0.51173	0.669724	0.440818	0.182958	0.87657	0.979718	0.603321	0.517144	0.634912	0.150631	0.380692	0.945048	0	0	1	0	0	1	0	0.532506	0.928263
DDA_dlfq_top3_count	1	DDA	Maxquant	limma	3	0.646188	0.517485	0.671983	0.485908	0.199224	0.837001	0.984113	0.594012	0.517144	0.772346	0.0577771	0.382149	0.967269	0	0	1	1	0	0	0.000363927	0.529551	0.736625
DDA_maxlfq_top0_top3	1	DDA	Maxquant	limma	3	0.298671	0.453332	0.123984	0.528466	0.291345	0.327334	0.30366	0.590504	0.463744	0.614687	0.570627	0.602186	0.413624	1	1	0	0	0	0	0.537084	0	0.514521
DDA_maxlfq_top0_count	1	DDA	Maxquant	limma	3	0.68508	0.529321	0.229358	0.603518	0.288461	0.664423	1	0.807537	0.526138	0.826823	0.523966	0.820036	0.479656	0	1	0	0	0	1	0.482932	0.439716	0
DDA_maxlfq_top3_count	1	DDA	Maxquant	limma	3	0.742251	0.52685	0.106482	0.648761	0.304442	0.675261	0.999206	0.90572	0.525014	0.961685	0.351997	0.820765	0.676869	0	1	0	1	0	0	0.494068	0.564421	0.202545
DDA_top0_top3_count	1	DDA	Maxquant	limma	3	0.398088	0.29859	0.144098	0.326527	0.0424508	0.605284	0.993895	0.475043	0.299044	0.525414	0.132527	0.371949	0.941296	0	1	1	0	0	0	0.482932	0.439716	0.312091
DDA_dlfq_maxlfq_top0_top3	1	DDA	Maxquant	limma	4	0.392054	0.500602	0.463749	0.659917	0.35462	0.388895	0.285001	0.491826	0.510118	0.602691	0.398795	0.457923	0.768334	1	0	0	0	0	0	0.0541524	0.0927896	1
DDA_dlfq_maxlfq_top0_count	1	DDA	Maxquant	limma	4	0.623969	0.612601	0.546436	0.959479	0.402376	0.635512	0.997651	0.721725	0.613406	0.783423	0.390203	0.657923	0.858436	0	0	0	0	0	1	0	0.532506	0.801855
DDA_dlfq_maxlfq_top3_count	1	DDA	Maxquant	limma	4	0.514876	0.61413	0.489217	1	0.399057	0.597309	0.996252	0.71596	0.613125	0.874836	0.279837	0.658834	0.942942	0	0	0	1	0	0	0.000363927	0.529551	0.626784
DDA_dlfq_top0_top3_count	1	DDA	Maxquant	limma	4	0.548455	0.385586	0.50783	0.530081	0.12819	0.690119	0.987034	0.461715	0.389123	0.553465	0.105384	0.286885	1	0	0	1	0	0	0	0	0.532506	0.637764
DDA_maxlfq_top0_top3_count	1	DDA	Maxquant	limma	4	0.43737	0.452023	0.15098	0.678033	0.231675	0.568075	0.999792	0.694701	0.453485	0.732152	0.394779	0.653734	0.880343	0	1	0	0	0	0	0.482932	0.439716	0.0938045
DDA_dlfq_maxlfq_top0_top3_count	1	DDA	Maxquant	limma	5	0.503227	0.512988	0.431642	0.959217	0.303183	0.575982	0.997127	0.617185	0.515852	0.709313	0.3138	0.54306	0.991359	0	0	0	0	0	0	0	0.532506	0.543641
DDA_dlfq_maxlfq	1	DDA	Maxquant	ROTS	2	0	1	0.795856	0.514988	1	0.0265079	0.150972	0.757656	1	0.95993	0.462192	0.902732	0.775033	1	0	0	1	0	1	0.0655797	0	0.717154
DDA_dlfq_top0	1	DDA	Maxquant	ROTS	2	0.724174	0.313515	0.794688	0.154433	0.160772	0.793297	0	0.491521	0.333895	0.356178	0.152201	0.0174863	0.45847	1	0	1	0	0	1	0.0541524	0.0927896	0.906545
DDA_dlfq_top3	1	DDA	Maxquant	ROTS	2	0.439125	0.330098	0.82	0.199149	0.0929105	0.531564	0.0764672	0.164357	0.335582	0.482927	0.0231141	0.020765	0.614986	1	0	1	1	0	0	0.0550258	0.0856974	0.754922
DDA_dlfq_count	1	DDA	Maxquant	ROTS	2	1	0.774131	1	0.234754	0.388104	1	0.970551	0.872904	0.768128	0.93614	0.107176	0.567213	0.762852	0	0	1	1	0	1	0.0034937	0.504137	0.82621
DDA_maxlfq_top0	1	DDA	Maxquant	ROTS	2	0.707619	0.684046	0.350092	0.487844	0.466028	0.546256	0.246316	0.920938	0.696459	0.842949	0.934723	0.902732	0.86773	1	1	0	0	0	1	0.537084	0	0.438123
DDA_maxlfq_top3	1	DDA	Maxquant	ROTS	2	0.5384	0.67595	0	0.541655	0.397313	0.435746	0.243345	0.97594	0.694772	0.969352	0.682441	0.903825	0.7054	1	1	0	1	0	0	0.556372	0.0585106	0.364119
DDA_maxlfq_count	1	DDA	Maxquant	ROTS	2	0.749482	0.456372	0.123496	0.264789	0.399355	0.610598	0.999183	1	0.432546	1	0.375745	1	0	0	1	0	1	0	1	1	1	0.218592
DDA_top0_top3	1	DDA	Maxquant	ROTS	2	0.104147	0	0.0218585	0	0.0106952	0	0.0633591	0	0	0	0.0736701	0	0.404933	1	1	1	0	0	0	0.537084	0	0.428973
DDA_top0_count	1	DDA	Maxquant	ROTS	2	0.622874	0.447544	0.214485	0.223393	0	0.836414	0.985416	0.59861	0.44941	0.646943	0.23073	0.557377	0.351684	0	1	1	0	0	1	0.482932	0.439716	0.187962
DDA_top3_count	1	DDA	Maxquant	ROTS	2	0.963611	0.448227	0.19595	0.260566	0.116657	0.979438	0.991199	0.863303	0.447723	0.892528	0.121305	0.55847	0.611398	0	1	1	1	0	0	0.495669	0.551418	0.576963
DDA_dlfq_maxlfq_top0	1	DDA	Maxquant	ROTS	3	0.530322	0.665854	0.646879	0.640836	0.542267	0.455354	0.206809	0.723372	0.676785	0.719686	0.516372	0.60765	0.82625	1	0	0	0	0	1	0.0541524	0.0927896	0.726875
DDA_dlfq_maxlfq_top3	1	DDA	Maxquant	ROTS	3	0.308572	0.668683	0.538619	0.685628	0.496741	0.331273	0.25335	0.632651	0.676785	0.80407	0.389249	0.609107	0.711965	1	0	0	1	0	0	0.0550258	0.0856974	0.739659
DDA_dlfq_maxlfq_count	1	DDA	Maxquant	ROTS	3	0.591931	0.743501	0.639784	0.63345	0.59582	0.545702	0.996675	0.876853	0.733558	0.965357	0.315037	0.823315	0.455564	0	0	0	1	0	1	0.0034937	0.504137	0.76795
DDA_dlfq_top0_top3	1	DDA	Maxquant	ROTS	3	0.424898	0.214538	0.545515	0.217816	0.0881258	0.44162	0.134179	0.218626	0.223159	0.279702	0.082995	0.0127504	0.54211	1	0	1	0	0	0	0.0541524	0.0927896	0.844535
DDA_dlfq_top0_count	1	DDA	Maxquant	ROTS	3	0.726278	0.51173	0.669724	0.440818	0.182958	0.87657	0.979718	0.654345	0.517144	0.646421	0.163369	0.380692	0.889903	0	0	1	0	0	1	0	0.532506	0.812933
DDA_dlfq_top3_count	1	DDA	Maxquant	ROTS	3	0.646188	0.517485	0.671983	0.485908	0.199224	0.837001	0.984113	0.633521	0.517144	0.770532	0.083865	0.382149	0.986832	0	0	1	1	0	0	0.000363927	0.529551	0.859871
DDA_maxlfq_top0_top3	1	DDA	Maxquant	ROTS	3	0.298671	0.453332	0.123984	0.528466	0.291345	0.327334	0.30366	0.632293	0.463744	0.604101	0.563611	0.602186	0.832944	1	1	0	0	0	0	0.537084	0	0.24615
DDA_maxlfq_top0_count	1	DDA	Maxquant	ROTS	3	0.68508	0.529321	0.229358	0.603518	0.288461	0.664423	1	0.839849	0.526138	0.829964	0.513733	0.820036	0.619451	0	1	0	0	0	1	0.482932	0.439716	0.128818
DDA_maxlfq_top3_count	1	DDA	Maxquant	ROTS	3	0.742251	0.52685	0.106482	0.648761	0.304442	0.675261	0.999206	0.946415	0.525014	0.95396	0.393164	0.820765	0.33242	0	1	0	1	0	0	0.494068	0.564421	0.338428
DDA_dlfq_maxlfq_top0_top3	1	DDA	Maxquant	ROTS	4	0.392054	0.500602	0.463749	0.659917	0.35462	0.388895	0.285001	0.551735	0.510118	0.60189	0.388057	0.457923	0.750266	1	0	0	0	0	0	0.0541524	0.0927896	0.854703
DDA_dlfq_maxlfq_top0_count	1	DDA	Maxquant	ROTS	4	0.623969	0.612601	0.546436	0.959479	0.402376	0.635512	0.997651	0.773605	0.613406	0.790357	0.377128	0.657923	0.54073	0	0	0	0	0	1	0	0.532506	0.711775
DDA_dlfq_maxlfq_top3_count	1	DDA	Maxquant	ROTS	4	0.514876	0.61413	0.489217	1	0.399057	0.597309	0.996252	0.77236	0.613125	0.87348	0.295329	0.658834	0.504093	0	0	0	1	0	0	0.000363927	0.529551	0.859581
DDA_dlfq_top0_top3_count	1	DDA	Maxquant	ROTS	4	0.548455	0.385586	0.50783	0.530081	0.12819	0.690119	0.987034	0.498449	0.389123	0.552453	0.118033	0.286885	0.977685	0	0	1	0	0	0	0	0.532506	0.867377
DDA_maxlfq_top0_top3_count	1	DDA	Maxquant	ROTS	4	0.43737	0.452023	0.15098	0.678033	0.231675	0.568075	0.999792	0.726465	0.453485	0.725296	0.403102	0.653734	0.517985	0	1	0	0	0	0	0.482932	0.439716	0.288835
DDA_dlfq_maxlfq_top0_top3_count	1	DDA	Maxquant	ROTS	5	0.503227	0.512988	0.431642	0.959217	0.303183	0.575982	0.997127	0.664523	0.515852	0.708695	0.31633	0.54306	0.517908	0	0	0	0	0	0	0	0.532506	0.366937
DDA_dlfq_maxlfq	2	DDA	Maxquant	limma	2	0.0280545	1	0.831474	0.640541	1	0.212172	0.0905179	0.695777	1	0.883603	0.59186	0.932803	0.179804	1	0	0	1	0	1	0.0584508	0	0.448521
DDA_dlfq_top0	2	DDA	Maxquant	limma	2	0.693742	0.291168	0.785643	0.176316	0.207049	0.84757	0	0.358291	0.317911	0.367492	0.0871551	0.0114943	0.662114	1	0	1	0	0	1	0.0512799	0.0373345	0.803015
DDA_dlfq_top3	2	DDA	Maxquant	limma	2	0.574098	0.309561	0.877029	0.218675	0.189722	0.744488	0.12369	0.266712	0.319233	0.468701	0.019123	0.0132626	0.46637	1	0	1	1	0	0	0.0518219	0.0345127	0.775119
DDA_dlfq_count	2	DDA	Maxquant	limma	2	1	0.812288	1	0.240488	0.357322	1	0.992205	0.730008	0.680106	0.90781	0.127547	0.481874	0.42463	0	0	1	1	0	1	0.00241808	0.29173	0.789665
DDA_maxlfq_top0	2	DDA	Maxquant	limma	2	0.781137	0.699288	0.285342	0.610044	0.505633	0.655432	0.0896345	0.9661	0.693985	0.791957	1	0.932803	0.403338	1	1	0	0	0	1	0.509005	0	0.26795
DDA_maxlfq_top3	2	DDA	Maxquant	limma	2	0.713702	0.690467	0	0.656938	0.469441	0.620347	0.126918	1	0.692664	0.859364	0.909068	0.932803	0.252051	1	1	0	1	0	0	0.529934	0.0401563	0.121473
DDA_maxlfq_count	2	DDA	Maxquant	limma	2	0.91448	0.499777	0.181657	0.285412	0.46044	0.769482	1	0.901792	0.453404	1	0.213376	1	0.22176	0	1	0	1	0	1	1	1	0
DDA_top0_top3	2	DDA	Maxquant	limma	2	0	0	0.075606	0	0	0	0.0652931	0.0718617	0	0.106613	0.0219385	0.00442086	0.459431	1	1	1	0	0	0	0.509005	0	0.626068
DDA_top0_count	2	DDA	Maxquant	limma	2	0.777311	0.505231	0.239692	0.227365	0.00465584	0.870322	0.996164	0.651809	0.368804	0.77717	0.411233	0.478338	0.662961	0	1	1	0	0	1	0.457725	0.266985	0.483038
DDA_top3_count	2	DDA	Maxquant	limma	2	0.97311	0.505426	0.233077	0.262351	0.111811	0.942778	0.996804	0.742508	0.368804	0.865952	0.311172	0.479222	0.329302	0	1	1	1	0	0	0.4719	0.342305	0.46762
DDA_dlfq_maxlfq_top0	2	DDA	Maxquant	limma	3	0.522889	0.663485	0.634153	0.808488	0.570894	0.571725	0.209868	0.673389	0.670632	0.681017	0.559672	0.6257	0.680444	1	0	0	0	0	1	0.0512799	0.0373345	0.737993
DDA_dlfq_maxlfq_top3	2	DDA	Maxquant	limma	3	0.41837	0.666676	0.569501	0.845931	0.553054	0.525669	0.254652	0.654163	0.670632	0.737222	0.506684	0.626289	0.465226	1	0	0	1	0	0	0.0518219	0.0345127	0.694976
DDA_dlfq_maxlfq_count	2	DDA	Maxquant	limma	3	0.631166	0.770688	0.671044	0.728837	0.60592	0.660551	0.996642	0.775859	0.71117	0.930471	0.310928	0.804892	0.528973	0	0	0	1	0	1	0.00241808	0.29173	0.590106
DDA_dlfq_top0_top3	2	DDA	Maxquant	limma	3	0.423657	0.200243	0.579426	0.224198	0.132257	0.530686	0.262221	0.232288	0.212382	0.314269	0.0427389	0.00972594	0.797234	1	0	1	0	0	0	0.0512799	0.0373345	0.903774
DDA_dlfq_top0_count	2	DDA	Maxquant	limma	3	0.761538	0.536229	0.675112	0.409544	0.189675	0.905964	0.990519	0.580036	0.455607	0.684157	0.208645	0.323902	0.665075	0	0	1	0	0	1	0	0.30432	0.876719
DDA_dlfq_top3_count	2	DDA	Maxquant	limma	3	0.72864	0.542425	0.703369	0.445815	0.219618	0.895755	0.989748	0.579743	0.456048	0.747487	0.152614	0.324786	0.490749	0	0	1	1	0	0	0.000125071	0.303668	0.752459
DDA_maxlfq_top0_top3	2	DDA	Maxquant	limma	3	0.375523	0.463252	0.120316	0.620465	0.325025	0.42526	0.214061	0.679321	0.462216	0.585978	0.643669	0.623342	0.689546	1	1	0	0	0	0	0.509005	0	0.488033
DDA_maxlfq_top0_count	2	DDA	Maxquant	limma	3	0.807343	0.568099	0.235564	0.696676	0.323576	0.765079	0.999397	0.839901	0.505398	0.856376	0.541536	0.803714	0.618457	0	1	0	0	0	1	0.457725	0.266985	0.432628
DDA_maxlfq_top3_count	2	DDA	Maxquant	limma	3	0.848317	0.565223	0.138245	0.735961	0.347231	0.777536	0.998848	0.881434	0.504957	0.908439	0.477872	0.804008	0.498508	0	1	0	1	0	0	0.470274	0.350771	0.2686
DDA_top0_top3_count	2	DDA	Maxquant	limma	3	0.450435	0.336886	0.182792	0.282042	0.0388223	0.604367	0.995407	0.488726	0.245869	0.583245	0.248114	0.32066	0.680791	0	1	1	0	0	0	0.457725	0.266985	0.618427
DDA_dlfq_maxlfq_top0_top3	2	DDA	Maxquant	limma	4	0.435509	0.498414	0.475849	0.763945	0.395308	0.513335	0.351185	0.55979	0.503966	0.579622	0.438191	0.471264	0.659511	1	0	0	0	0	0	0.0512799	0.0373345	0.851149
DDA_dlfq_maxlfq_top0_count	2	DDA	Maxquant	limma	4	0.66053	0.634625	0.553968	0.964006	0.422517	0.72583	0.994878	0.717296	0.585702	0.788005	0.405195	0.639552	0.927392	0	0	0	0	0	1	0	0.30432	0.849364
DDA_dlfq_maxlfq_top3_count	2	DDA	Maxquant	limma	4	0.606833	0.636253	0.52054	1	0.431456	0.714878	0.993404	0.722799	0.585702	0.830905	0.362024	0.639994	0.47332	0	0	0	1	0	0	0.000125071	0.303668	0.651559
DDA_dlfq_top0_top3_count	2	DDA	Maxquant	limma	4	0.590286	0.403946	0.535174	0.445809	0.145093	0.734193	0.985809	0.470198	0.342476	0.58229	0.163028	0.244769	0.676804	0	0	1	0	0	0	0	0.30432	0.87276
DDA_maxlfq_top0_top3_count	2	DDA	Maxquant	limma	4	0.545505	0.483365	0.169229	0.723922	0.258664	0.64306	0.997622	0.722345	0.42961	0.733509	0.477798	0.637931	0.984666	0	1	0	0	0	0	0.457725	0.266985	0.421048
DDA_dlfq_maxlfq_top0_top3_count	2	DDA	Maxquant	limma	5	0.567402	0.531321	0.450952	0.988169	0.330607	0.666259	0.990138	0.638486	0.489491	0.702866	0.369247	0.526702	0.820993	0	0	0	0	0	0	0	0.30432	0.721823
DDA_dlfq_maxlfq	2	DDA	Maxquant	ROTS	2	0.0280545	1	0.831474	0.640541	1	0.212172	0.0905179	0.274894	0.993391	0.793385	0.846853	0.918656	0.419518	1	0	0	1	0	1	0.0584508	0	0.644644
DDA_dlfq_top0	2	DDA	Maxquant	ROTS	2	0.693742	0.291168	0.785643	0.176316	0.207049	0.84757	0	0.103898	0.31725	0.165517	0.0644352	0.00618924	0.441044	1	0	1	0	0	1	0.0512799	0.0373345	0.839797
DDA_dlfq_top3	2	DDA	Maxquant	ROTS	2	0.574098	0.309561	0.877029	0.218675	0.189722	0.744488	0.12369	0	0.318572	0.268661	0	0.00795756	0.672259	1	0	1	1	0	0	0.0518219	0.0345127	0.862971
DDA_dlfq_count	2	DDA	Maxquant	ROTS	2	1	0.812288	1	0.240488	0.357322	1	0.992205	0.66573	0.68275	0.850471	0.453259	0.48099	0.890016	0	0	1	1	0	1	0.00241808	0.29173	0.881833
DDA_maxlfq_top0	2	DDA	Maxquant	ROTS	2	0.781137	0.699288	0.285342	0.610044	0.505633	0.655432	0.0896345	0.548035	0.686715	0.747059	0.851407	0.918656	0.574689	1	1	0	0	0	1	0.509005	0	0.234334
DDA_maxlfq_top3	2	DDA	Maxquant	ROTS	2	0.713702	0.690467	0	0.656938	0.469441	0.620347	0.126918	0.52124	0.685393	0.808779	0.757606	0.918656	0.469447	1	1	0	1	0	0	0.529934	0.0401563	0.334438
DDA_maxlfq_count	2	DDA	Maxquant	ROTS	2	0.91448	0.499777	0.181657	0.285412	0.46044	0.769482	1	0.649619	0.444151	0.981025	0.0830772	0.986737	0	0	1	0	1	0	1	1	1	0.153138
DDA_top0_top3	2	DDA	Maxquant	ROTS	2	0	0	0.075606	0	0	0	0.0652931	0.0240437	0	0	0.0207477	0	0.942771	1	1	1	0	0	0	0.509005	0	0.774483
DDA_top0_count	2	DDA	Maxquant	ROTS	2	0.777311	0.505231	0.239692	0.227365	0.00465584	0.870322	0.996164	0.645442	0.372108	0.764278	0.528858	0.478338	0.475205	0	1	1	0	0	1	0.457725	0.266985	0.643891
DDA_top3_count	2	DDA	Maxquant	ROTS	2	0.97311	0.505426	0.233077	0.262351	0.111811	0.942778	0.996804	0.729695	0.372108	0.842319	0.428272	0.479222	0.417627	0	1	1	1	0	0	0.4719	0.342305	0.726052
DDA_dlfq_maxlfq_top0	2	DDA	Maxquant	ROTS	3	0.522889	0.663485	0.634153	0.808488	0.570894	0.571725	0.209868	0.308942	0.665785	0.568653	0.587565	0.6145	0.370194	1	0	0	0	0	1	0.0512799	0.0373345	0.842629
DDA_dlfq_maxlfq_top3	2	DDA	Maxquant	ROTS	3	0.41837	0.666676	0.569501	0.845931	0.553054	0.525669	0.254652	0.265378	0.665785	0.623608	0.53482	0.61509	0.721507	1	0	0	1	0	0	0.0518219	0.0345127	0.860149
DDA_dlfq_maxlfq_count	2	DDA	Maxquant	ROTS	3	0.631166	0.770688	0.671044	0.728837	0.60592	0.660551	0.996642	0.530081	0.706764	0.87496	0.461063	0.795461	0.787874	0	0	0	1	0	1	0.00241808	0.29173	0.827054
DDA_dlfq_top0_top3	2	DDA	Maxquant	ROTS	3	0.423657	0.200243	0.579426	0.224198	0.132257	0.530686	0.262221	0.0426474	0.211941	0.144726	0.0283943	0.0047156	0.541286	1	0	1	0	0	0	0.0512799	0.0373345	1
DDA_dlfq_top0_count	2	DDA	Maxquant	ROTS	3	0.761538	0.536229	0.675112	0.409544	0.189675	0.905964	0.990519	0.47169	0.457369	0.593422	0.348851	0.321839	0.725047	0	0	1	0	0	1	0	0.30432	0.853455
DDA_dlfq_top3_count	2	DDA	Maxquant	ROTS	3	0.72864	0.542425	0.703369	0.445815	0.219618	0.895755	0.989748	0.465142	0.45781	0.653817	0.293844	0.322723	1	0	0	1	1	0	0	0.000125071	0.303668	0.904128
DDA_maxlfq_top0_top3	2	DDA	Maxquant	ROTS	3	0.375523	0.463252	0.120316	0.620465	0.325025	0.42526	0.214061	0.36444	0.457369	0.518613	0.543254	0.612437	0.543181	1	1	0	0	0	0	0.509005	0	0.247038
DDA_maxlfq_top0_count	2	DDA	Maxquant	ROTS	3	0.807343	0.568099	0.235564	0.696676	0.323576	0.765079	0.999397	0.614365	0.500991	0.830787	0.487781	0.794577	0.0800071	0	1	0	0	0	1	0.457725	0.266985	0.337838
DDA_maxlfq_top3_count	2	DDA	Maxquant	ROTS	3	0.848317	0.565223	0.138245	0.735961	0.347231	0.777536	0.998848	0.633518	0.500551	0.877374	0.422985	0.794872	0.456	0	1	0	1	0	0	0.470274	0.350771	0.311473
DDA_top0_top3_count	2	DDA	Maxquant	ROTS	3	0.450435	0.336886	0.182792	0.282042	0.0388223	0.604367	0.995407	0.466393	0.248072	0.535532	0.325959	0.319187	0.803022	0	1	1	0	0	0	0.457725	0.266985	0.842021
DDA_dlfq_maxlfq_top0_top3	2	DDA	Maxquant	ROTS	4	0.435509	0.498414	0.475849	0.763945	0.395308	0.513335	0.351185	0.245352	0.50022	0.4639	0.423508	0.461686	0.601868	1	0	0	0	0	0	0.0512799	0.0373345	0.936148
DDA_dlfq_maxlfq_top0_count	2	DDA	Maxquant	ROTS	4	0.66053	0.634625	0.553968	0.964006	0.422517	0.72583	0.994878	0.48127	0.582727	0.716956	0.471315	0.631594	0.689104	0	0	0	0	0	1	0	0.30432	0.918373
DDA_dlfq_maxlfq_top3_count	2	DDA	Maxquant	ROTS	4	0.606833	0.636253	0.52054	1	0.431456	0.714878	0.993404	0.47353	0.582727	0.75744	0.428178	0.632037	0.877803	0	0	0	1	0	0	0.000125071	0.303668	0.843097
DDA_dlfq_top0_top3_count	2	DDA	Maxquant	ROTS	4	0.590286	0.403946	0.535174	0.445809	0.145093	0.734193	0.985809	0.361468	0.343798	0.481874	0.249262	0.242116	0.912134	0	0	1	0	0	0	0	0.30432	0.822077
DDA_maxlfq_top0_top3_count	2	DDA	Maxquant	ROTS	4	0.545505	0.483365	0.169229	0.723922	0.258664	0.64306	0.997622	0.519679	0.426746	0.690577	0.444995	0.630268	0.552296	0	1	0	0	0	0	0.457725	0.266985	0.373545
DDA_dlfq_maxlfq_top0_top3_count	2	DDA	Maxquant	ROTS	5	0.567402	0.531321	0.450952	0.988169	0.330607	0.666259	0.990138	0.41626	0.487244	0.622149	0.403452	0.51954	0.860591	0	0	0	0	0	0	0	0.30432	0.768548
DDA_dlfq_maxlfq	3	DDA	Maxquant	limma	2	0.274282	0.702836	0.601764	0.740889	0.735116	0.498955	0.388997	0.500094	0.6161	0.921889	0.279383	1	0.250025	1	0	0	1	0	1	0.848049	0.815929	0.287498
DDA_dlfq_top0	3	DDA	Maxquant	limma	2	0.743154	0.956907	1	0.68389	0	0.63883	0.0330847	0.543568	0.931596	0.830301	0.296644	0.699224	0.797084	1	0	1	0	0	1	0	0.536954	0.619432
DDA_dlfq_top3	3	DDA	Maxquant	limma	2	0.590248	0.955251	0.971967	0.714513	0.0138152	0.573174	0.0476078	0.477356	0.931131	0.840281	0.0605318	0.699224	0.737802	1	0	1	1	0	0	0.00593885	0.548152	0.759183
DDA_dlfq_count	3	DDA	Maxquant	limma	2	1	0.21329	0.843683	0.226884	0.121767	0.995255	0.998872	1	0.265705	0.9342	0.268394	0.717613	0	0	0	1	1	0	1	1	0.357503	0.253115
DDA_maxlfq_top0	3	DDA	Maxquant	limma	2	0.556914	1	0.794853	0.53958	1	0.604545	0.132972	0.447022	1	0.886807	1	0.878218	0.236058	1	1	0	0	0	1	0.17798	0	0.405437
DDA_maxlfq_top3	3	DDA	Maxquant	limma	2	0.340982	0.997999	0.534895	0.56196	0.985563	0.526683	0.134894	0.29462	0.999535	0.889042	0.449766	0.878218	0.274841	1	1	0	1	0	0	0.184151	0.0104983	0.42203
DDA_maxlfq_count	3	DDA	Maxquant	limma	2	0.946636	0.573109	0	0.122757	0.676633	0.826837	0.999492	0.80847	0.469055	1	0.93862	0.955864	0.813822	0	1	0	1	0	1	0.965016	0.642497	0
DDA_top0_top3	3	DDA	Maxquant	limma	2	0	0	0.598002	0	0.000568315	0	0	0.0134616	0	0.0363285	0.0533406	0	0.831069	1	1	1	0	0	0	0.17798	0	0.974853
DDA_top0_count	3	DDA	Maxquant	limma	2	0.806873	0.736441	0.764642	0.10513	0.171092	0.966691	0.99483	0.826421	0.707306	0.963949	0.560716	0.621169	0.136361	0	1	1	0	0	1	0.17798	0	0.528421
DDA_top3_count	3	DDA	Maxquant	limma	2	0.964222	0.735751	0.746134	0.111213	0.248019	1	0.995637	0.929381	0.70684	0.992154	0.476792	0.621169	0.194375	0	1	1	1	0	0	0.183269	0.0131579	0.693628
DDA_dlfq_maxlfq_top0	3	DDA	Maxquant	limma	3	0.499556	0.886581	0.798873	0.97811	0.578372	0.580776	0.345957	0.496895	0.849232	0.879666	0.525342	0.859147	0.790753	1	0	0	0	0	1	0	0.536954	0.714467
DDA_dlfq_maxlfq_top3	3	DDA	Maxquant	limma	3	0.356987	0.885362	0.702875	1	0.578164	0.532937	0.327917	0.424023	0.848922	0.883737	0.263227	0.859147	0.84638	1	0	0	1	0	0	0.00515009	0.550532	0.745666
DDA_dlfq_maxlfq_count	3	DDA	Maxquant	limma	3	0.769547	0.496412	0.481816	0.665705	0.511172	0.773682	1	0.769522	0.450287	0.95203	0.495466	0.891159	0.447718	0	0	0	1	0	1	0.787037	1	0.320525
DDA_dlfq_top0_top3	3	DDA	Maxquant	limma	3	0.198889	0.637386	0.856657	0.71568	0.0047945	0.404001	0.102385	0.344795	0.620909	0.56897	0.136839	0.466149	0.967171	1	0	1	0	0	0	0	0.536954	0.892158
DDA_dlfq_top0_count	3	DDA	Maxquant	limma	3	0.809232	0.635546	0.869442	0.627486	0.0976197	0.866925	0.998655	0.789996	0.634869	0.909483	0.375252	0.679335	0.73117	0	0	1	0	0	1	0	0.536954	0.574063
DDA_dlfq_top3_count	3	DDA	Maxquant	limma	3	0.81203	0.634764	0.853928	0.648335	0.127867	0.856143	0.998654	0.802246	0.634559	0.922212	0.268573	0.679335	0.702365	0	0	1	1	0	0	0.00528929	0.550112	0.370519
DDA_maxlfq_top0_top3	3	DDA	Maxquant	limma	3	0.117649	0.666	0.642583	0.520848	0.662044	0.377076	0.163797	0.251701	0.666512	0.604059	0.501036	0.585479	0.793314	1	1	0	0	0	0	0.17798	0	0.748149
DDA_maxlfq_top0_count	3	DDA	Maxquant	limma	3	0.70208	0.76985	0.519832	0.466359	0.615908	0.799357	0.999318	0.693971	0.725454	0.950252	0.833112	0.818417	0.515939	0	1	0	0	0	1	0.17798	0	0.123144
DDA_maxlfq_top3_count	3	DDA	Maxquant	limma	3	0.669089	0.768953	0.427009	0.481822	0.636738	0.784507	0.999189	0.677491	0.725143	0.960399	0.621726	0.818417	0.299795	0	1	0	1	0	0	0.182805	0.0145577	0.437225
DDA_top0_top3_count	3	DDA	Maxquant	limma	3	0.258335	0.490731	0.702926	0.14762	0.139893	0.655564	0.995365	0.589755	0.471382	0.664144	0.363616	0.414113	0.783319	0	1	1	0	0	0	0.17798	0	0.875358
DDA_dlfq_maxlfq_top0_top3	3	DDA	Maxquant	limma	4	0.186406	0.768832	0.750247	0.958749	0.455844	0.473698	0.293727	0.379354	0.746394	0.734108	0.356611	0.692481	1	1	0	0	0	0	0	0	0.536954	0.911144
DDA_dlfq_maxlfq_top0_count	3	DDA	Maxquant	limma	4	0.637818	0.697097	0.66749	0.883731	0.450768	0.755185	0.999889	0.687596	0.66496	0.922858	0.557293	0.812015	0.557653	0	0	0	0	0	1	0	0.536954	0.409259
DDA_dlfq_maxlfq_top3_count	3	DDA	Maxquant	limma	4	0.580854	0.696373	0.616407	0.903346	0.463485	0.736817	0.999832	0.66832	0.664728	0.929594	0.412248	0.812015	0.692734	0	0	0	1	0	0	0.00482531	0.551512	0.74888
DDA_dlfq_top0_top3_count	3	DDA	Maxquant	limma	4	0.305882	0.599607	0.820738	0.686743	0.0925436	0.695658	0.998178	0.631698	0.59043	0.766202	0.28607	0.559733	0.963197	0	0	1	0	0	0	0	0.536954	0.693912
DDA_maxlfq_top0_top3_count	3	DDA	Maxquant	limma	4	0.270842	0.673883	0.573088	0.507691	0.513646	0.654126	0.998876	0.553229	0.647123	0.794714	0.579872	0.659106	0.598208	0	1	0	0	0	0	0.17798	0	0.344532
DDA_dlfq_maxlfq_top0_top3_count	3	DDA	Maxquant	limma	5	0.28651	0.687158	0.685594	0.890576	0.395257	0.663097	0.999657	0.584039	0.662727	0.829495	0.438419	0.70707	0.973088	0	0	0	0	0	0	0	0.536954	0.539586
DDA_dlfq_maxlfq	3	DDA	Maxquant	ROTS	2	0.274282	0.702836	0.601764	0.740889	0.735116	0.498955	0.388997	0.459616	0.6161	0.911958	0.263447	1	0.396278	1	0	0	1	0	1	0.848049	0.815929	0.279625
DDA_dlfq_top0	3	DDA	Maxquant	ROTS	2	0.743154	0.956907	1	0.68389	0	0.63883	0.0330847	0.52582	0.931596	0.819676	0.28707	0.699224	0.609498	1	0	1	0	0	1	0	0.536954	0.805986
DDA_dlfq_top3	3	DDA	Maxquant	ROTS	2	0.590248	0.955251	0.971967	0.714513	0.0138152	0.573174	0.0476078	0.386728	0.931131	0.81372	0.0850166	0.699224	0.732567	1	0	1	1	0	0	0.00593885	0.548152	0.634926
DDA_dlfq_count	3	DDA	Maxquant	ROTS	2	1	0.21329	0.843683	0.226884	0.121767	0.995255	0.998872	0.993585	0.265705	0.933058	0.274282	0.717613	0.737092	0	0	1	1	0	1	1	0.357503	0.235203
DDA_maxlfq_top0	3	DDA	Maxquant	ROTS	2	0.556914	1	0.794853	0.53958	1	0.604545	0.132972	0.439535	1	0.880082	0.944981	0.878218	0.459189	1	1	0	0	0	1	0.17798	0	0.404491
DDA_maxlfq_top3	3	DDA	Maxquant	ROTS	2	0.340982	0.997999	0.534895	0.56196	0.985563	0.526683	0.134894	0.269816	0.999535	0.87134	0.60865	0.878218	0.339797	1	1	0	1	0	0	0.184151	0.0104983	0.324775
DDA_maxlfq_count	3	DDA	Maxquant	ROTS	2	0.946636	0.573109	0	0.122757	0.676633	0.826837	0.999492	0.800611	0.469055	0.995589	0.897669	0.955864	0.27811	0	1	0	1	0	1	0.965016	0.642497	0.0960651
DDA_top0_top3	3	DDA	Maxquant	ROTS	2	0	0	0.598002	0	0.000568315	0	0	0	0	0	0	0	0.582569	1	1	1	0	0	0	0.17798	0	0.674808
DDA_top0_count	3	DDA	Maxquant	ROTS	2	0.806873	0.736441	0.764642	0.10513	0.171092	0.966691	0.99483	0.822669	0.707306	0.960614	0.576577	0.621169	0.586632	0	1	1	0	0	1	0.17798	0	0.522143
DDA_top3_count	3	DDA	Maxquant	ROTS	2	0.964222	0.735751	0.746134	0.111213	0.248019	1	0.995637	0.910745	0.70684	0.972432	0.373446	0.621169	0.747395	0	1	1	1	0	0	0.183269	0.0131579	1
DDA_dlfq_maxlfq_top0	3	DDA	Maxquant	ROTS	3	0.499556	0.886581	0.798873	0.97811	0.578372	0.580776	0.345957	0.47499	0.849232	0.870572	0.498499	0.859147	0.357158	1	0	0	0	0	1	0	0.536954	0.769317
DDA_dlfq_maxlfq_top3	3	DDA	Maxquant	ROTS	3	0.356987	0.885362	0.702875	1	0.578164	0.532937	0.327917	0.372053	0.848922	0.865673	0.319038	0.859147	0.383881	1	0	0	1	0	0	0.00515009	0.550532	0.691043
DDA_dlfq_maxlfq_count	3	DDA	Maxquant	ROTS	3	0.769547	0.496412	0.481816	0.665705	0.511172	0.773682	1	0.751271	0.450287	0.946869	0.478466	0.891159	0.224946	0	0	0	1	0	1	0.787037	1	0.242697
DDA_dlfq_top0_top3	3	DDA	Maxquant	ROTS	3	0.198889	0.637386	0.856657	0.71568	0.0047945	0.404001	0.102385	0.304182	0.620909	0.544465	0.124029	0.466149	0.794756	1	0	1	0	0	0	0	0.536954	0.909489
DDA_dlfq_top0_count	3	DDA	Maxquant	ROTS	3	0.809232	0.635546	0.869442	0.627486	0.0976197	0.866925	0.998655	0.780691	0.634869	0.904449	0.37931	0.679335	0.858238	0	0	1	0	0	1	0	0.536954	0.358415
DDA_dlfq_top3_count	3	DDA	Maxquant	ROTS	3	0.81203	0.634764	0.853928	0.648335	0.127867	0.856143	0.998654	0.763686	0.634559	0.906403	0.244248	0.679335	0.92754	0	0	1	1	0	0	0.00528929	0.550112	0.468309
DDA_maxlfq_top0_top3	3	DDA	Maxquant	ROTS	3	0.117649	0.666	0.642583	0.520848	0.662044	0.377076	0.163797	0.236451	0.666512	0.583807	0.517877	0.585479	0.52061	1	1	0	0	0	0	0.17798	0	0.691297
DDA_maxlfq_top0_count	3	DDA	Maxquant	ROTS	3	0.70208	0.76985	0.519832	0.466359	0.615908	0.799357	0.999318	0.687605	0.725454	0.945428	0.806409	0.818417	0.312838	0	1	0	0	0	1	0.17798	0	0.341813
DDA_maxlfq_top3_count	3	DDA	Maxquant	ROTS	3	0.669089	0.768953	0.427009	0.481822	0.636738	0.784507	0.999189	0.660391	0.725143	0.946454	0.626588	0.818417	0.230888	0	1	0	1	0	0	0.182805	0.0145577	0.438296
DDA_top0_top3_count	3	DDA	Maxquant	ROTS	3	0.258335	0.490731	0.702926	0.14762	0.139893	0.655564	0.995365	0.577805	0.471382	0.644349	0.316674	0.414113	0.822623	0	1	1	0	0	0	0.17798	0	0.589239
DDA_dlfq_maxlfq_top0_top3	3	DDA	Maxquant	ROTS	4	0.186406	0.768832	0.750247	0.958749	0.455844	0.473698	0.293727	0.346919	0.746394	0.716129	0.364861	0.692481	0.506988	1	0	0	0	0	0	0	0.536954	0.978709
DDA_dlfq_maxlfq_top0_count	3	DDA	Maxquant	ROTS	4	0.637818	0.697097	0.66749	0.883731	0.450768	0.755185	0.999889	0.673639	0.66496	0.91683	0.540671	0.812015	0.30532	0	0	0	0	0	1	0	0.536954	0.703093
DDA_dlfq_maxlfq_top3_count	3	DDA	Maxquant	ROTS	4	0.580854	0.696373	0.616407	0.903346	0.463485	0.736817	0.999832	0.63685	0.664728	0.91635	0.417085	0.812015	0.455042	0	0	0	1	0	0	0.00482531	0.551512	0.510546
DDA_dlfq_top0_top3_count	3	DDA	Maxquant	ROTS	4	0.305882	0.599607	0.820738	0.686743	0.0925436	0.695658	0.998178	0.606591	0.59043	0.749917	0.266065	0.559733	0.947083	0	0	1	0	0	0	0	0.536954	0.664151
DDA_maxlfq_top0_top3_count	3	DDA	Maxquant	ROTS	4	0.270842	0.673883	0.573088	0.507691	0.513646	0.654126	0.998876	0.540563	0.647123	0.78001	0.566887	0.659106	0.407045	0	1	0	0	0	0	0.17798	0	0.438992
DDA_dlfq_maxlfq_top0_top3_count	3	DDA	Maxquant	ROTS	5	0.28651	0.687158	0.685594	0.890576	0.395257	0.663097	0.999657	0.560913	0.662727	0.815847	0.431114	0.70707	0.552405	0	0	0	0	0	0	0	0.536954	0.704677
DDA_dlfq_maxlfq	4	DDA	Maxquant	limma	2	0.254686	0.796822	0.808671	0.646689	1	0.169301	0.20203	0	0.551483	0.708553	0.03324	1	1	1	0	0	1	0	1	0.582188	0.463792	0
DDA_dlfq_top0	4	DDA	Maxquant	limma	2	0.634274	1	0.872422	0.672643	0.0581527	0.236676	0	0.651777	1	0.961196	0.726465	0.488889	0.0603228	1	0	1	0	0	1	0	0.995025	0.253857
DDA_dlfq_top3	4	DDA	Maxquant	limma	2	0.530676	0.993568	0.851953	0.697672	0.215963	0.287776	0.0260368	0.814262	0.99651	1	0.659766	0.488889	0.533855	1	0	1	1	0	0	0.00475687	0.995578	0.931104
DDA_dlfq_count	4	DDA	Maxquant	limma	2	1	0	1	0.146402	0.568214	1	0.997756	1	0.0663176	0.462339	0	0.558025	0.240025	0	0	1	1	0	1	0.698467	0.220564	0.20655
DDA_maxlfq_top0	4	DDA	Maxquant	limma	2	0.489836	0.631858	0.468616	0.458474	0.723602	0.291746	0.143159	0.434997	0.612565	0.677829	1	0.674074	0.0435764	1	1	0	0	0	1	0.475687	0	0.574066
DDA_maxlfq_top3	4	DDA	Maxquant	limma	2	0.405841	0.630723	0	0.475156	0.902767	0.348713	0.135374	0.591133	0.616056	0.746409	0.908147	0.679012	0.384249	1	1	0	1	0	0	0.478594	0.00442233	1
DDA_maxlfq_count	4	DDA	Maxquant	limma	2	0.893339	0.130533	0.035078	0	0.457207	0.794095	0.999395	0.681749	0	0.433978	0.0991921	0.97037	0.030342	0	1	0	1	0	1	1	0.36429	0.501034
DDA_dlfq_maxlfq_top0	4	DDA	Maxquant	limma	3	0.468431	0.80956	0.71657	0.982497	0.593918	0.232574	0.24506	0.362258	0.72135	0.782526	0.586568	0.720988	0	1	0	0	0	0	1	0	0.995025	0.72089
DDA_dlfq_maxlfq_top3	4	DDA	Maxquant	limma	3	0.394009	0.807037	0.553541	1	0.706243	0.268597	0.226394	0.468465	0.72135	0.818321	0.533718	0.722634	0.394348	1	0	0	1	0	0	0.00290698	0.999447	0.730487
DDA_dlfq_maxlfq_count	4	DDA	Maxquant	limma	3	0.740503	0.309118	0.614583	0.620032	0.67514	0.654465	0.999939	0.560583	0.205934	0.534957	0.044144	0.842798	0.723441	0	0	0	1	0	1	0.524313	0.584854	0.480824
DDA_dlfq_top0_top3	4	DDA	Maxquant	limma	3	0.0683389	0.389583	0.619333	0.720485	0	0	0.0921828	0.498907	0.480512	0.178986	0.465807	0	0.650756	1	0	1	0	0	0	0	0.995025	0.392348
DDA_dlfq_top0_count	4	DDA	Maxquant	limma	3	0.728249	0.38933	0.826023	0.648366	0.317625	0.730709	0.998441	0.769844	0.513089	0.567389	0.460157	0.507819	0.729745	0	0	1	0	0	1	0	0.995025	0.528021
DDA_dlfq_top3_count	4	DDA	Maxquant	limma	3	0.742838	0.385547	0.793938	0.664288	0.459857	0.802719	0.998262	0.936597	0.510762	0.639849	0.430447	0.507819	0.333013	0	0	1	1	0	0	0.00422833	0.996683	0.723825
DDA_maxlfq_top0_top3	4	DDA	Maxquant	limma	3	0	0.14592	0.200747	0.398401	0.450751	0.0386689	0.18382	0.352271	0.224549	0	0.639779	0.125103	0.844968	1	1	0	0	0	0	0.475687	0	0.242882
DDA_maxlfq_top0_count	4	DDA	Maxquant	limma	3	0.64646	0.310127	0.36978	0.406629	0.502439	0.680431	0.999655	0.5915	0.361838	0.46348	0.584399	0.706996	0.417974	0	1	0	0	0	1	0.475687	0	0.786146
DDA_maxlfq_top3_count	4	DDA	Maxquant	limma	3	0.673308	0.308109	0.188313	0.421926	0.65179	0.754396	0.999447	0.756137	0.361838	0.545865	0.546305	0.708642	0.186556	0	1	0	1	0	0	0.47833	0.00497512	0.775985
DDA_dlfq_maxlfq_top0_top3	4	DDA	Maxquant	limma	4	0.136744	0.538025	0.522548	0.979026	0.437728	0.13496	0.252595	0.420475	0.53694	0.444958	0.556468	0.392181	0.657046	1	0	0	0	0	0	0	0.995025	0.404597
DDA_dlfq_maxlfq_top0_count	4	DDA	Maxquant	limma	4	0.617712	0.454534	0.631739	0.943909	0.522281	0.574545	1	0.571046	0.450553	0.587088	0.418817	0.69465	0.363645	0	0	0	0	0	1	0	0.995025	0.705788
DDA_dlfq_maxlfq_top3_count	4	DDA	Maxquant	limma	4	0.603751	0.452453	0.537594	0.955957	0.623258	0.620044	0.999847	0.680445	0.449971	0.634748	0.388654	0.695473	0.228718	0	0	0	1	0	0	0.00264271	1	0.90623
DDA_dlfq_top0_top3_count	4	DDA	Maxquant	limma	4	0.24744	0.249968	0.665584	0.725792	0.248353	0.512639	0.998492	0.691667	0.408377	0.289189	0.447167	0.251852	0.33519	0	0	1	0	0	0	0	0.995025	0.32564
DDA_maxlfq_top0_top3_count	4	DDA	Maxquant	limma	4	0.210669	0.149893	0.295471	0.42681	0.455227	0.497656	0.999557	0.565307	0.269343	0.19497	0.550685	0.383128	0.533501	0	1	0	0	0	0	0.475687	0	0.692809
DDA_dlfq_maxlfq_top0_top3_count	4	DDA	Maxquant	limma	5	0.269723	0.368975	0.530587	0.970734	0.457369	0.467969	0.999877	0.585788	0.423037	0.430191	0.472358	0.483457	0.361623	0	0	0	0	0	0	0	0.995025	0.882124
DDA_dlfq_maxlfq	5	DDA	Maxquant	limma	2	0.426219	1	0.667237	0.813499	0.475397	0.46334	0.0779062	0.527215	0.746445	0.874581	0.0933453	0.976314	0.236514	1	0	0	1	0	1	0.633994	0.639938	0.854051
DDA_dlfq_top0	5	DDA	Maxquant	limma	2	0.770338	0.976938	0.541884	0.621016	0	0.524405	0	0.770965	1	0.838596	0.30001	0.703183	0.489508	1	0	1	0	0	1	0	0.998448	0.75373
DDA_dlfq_top3	5	DDA	Maxquant	limma	2	0.680628	0.975977	0.606985	0.630946	0.0619302	0.503294	0.0563799	0.743558	0.99921	0.883082	0.413441	0.703183	0.670717	1	0	1	1	0	0	0.00172339	0.999483	0.938421
DDA_dlfq_count	5	DDA	Maxquant	limma	2	1	0.38533	1	0.364263	0.762869	1	0.994946	0.86809	0.442338	0.895953	0.133004	0.84752	0	0	0	1	1	0	1	0.795778	0.251423	0.899816
DDA_maxlfq_top0	5	DDA	Maxquant	limma	2	0.471342	0.964126	0.541203	0.504537	0.406666	0.446567	0.0800502	0.462644	0.835703	0.735125	0.205205	0.783124	0.300645	1	1	0	0	0	1	0.415769	0	0.62587
DDA_maxlfq_top3	5	DDA	Maxquant	limma	2	0.290071	0.963485	0	0.520856	0.323183	0.392139	0.131592	0.422548	0.834913	0.799954	0.073002	0.783124	0.302702	1	1	0	1	0	0	0.417277	0.001552	0.852301
DDA_maxlfq_count	5	DDA	Maxquant	limma	2	0.908881	0.68706	0.616381	0.223201	0.903052	0.866393	1	0.807782	0.432859	0.955087	0.692225	1	0.576637	0	1	0	1	0	1	1	0.508019	0.702999
DDA_top0_top3	5	DDA	Maxquant	limma	2	0	0	0.311153	0	0.0262645	0	0.0662857	0	0	0.0312367	0.00384124	0	0.650381	1	1	1	0	0	0	0.415769	0	0.375036
DDA_top0_count	5	DDA	Maxquant	limma	2	0.730139	0.590006	0.880956	0.176184	0.684071	0.950956	0.98871	0.841847	0.864929	0.899369	0.606191	0.810511	0.195319	0	1	1	0	0	1	0.415769	0	0.588601
DDA_top3_count	5	DDA	Maxquant	limma	2	0.891046	0.589366	0.859662	0.179551	1	0.978134	0.990245	1	0.864139	1	1	0.810511	0.145513	0	1	1	1	0	0	0.417277	0.001552	0.202161
DDA_dlfq_maxlfq_top0	5	DDA	Maxquant	limma	3	0.555594	0.980354	0.583441	0.992925	0.294021	0.478104	0.164226	0.586941	0.860716	0.816101	0.19952	0.820873	0.388621	1	0	0	0	0	1	0	0.998448	0.741409
DDA_dlfq_maxlfq_top3	5	DDA	Maxquant	limma	3	0.461096	0.979821	0.42474	1	0.286837	0.452924	0.213842	0.56444	0.86019	0.852539	0.193263	0.820873	0.537675	1	0	0	1	0	0	0.00150797	1	0.780075
DDA_dlfq_maxlfq_count	5	DDA	Maxquant	limma	3	0.779601	0.690797	0.761206	0.81656	0.713773	0.776578	0.999244	0.734363	0.540547	0.90854	0.306191	0.941278	0.618539	0	0	0	1	0	1	0.584231	0.759441	0.766747
DDA_dlfq_top0_top3	5	DDA	Maxquant	limma	3	0.3565	0.650972	0.486674	0.64223	0.0293982	0.342566	0.185514	0.504841	0.666403	0.584305	0.239097	0.468789	0.876502	1	0	1	0	0	0	0	0.998448	1
DDA_dlfq_top0_count	5	DDA	Maxquant	limma	3	0.817167	0.650758	0.807614	0.686738	0.482313	0.82512	0.988322	0.826967	0.769089	0.877973	0.346402	0.787071	0.333605	0	0	1	0	0	1	0	0.998448	0.812618
DDA_dlfq_top3_count	5	DDA	Maxquant	limma	3	0.837916	0.650224	0.822216	0.693047	0.608266	0.827143	0.988816	0.87055	0.768562	0.926345	0.515481	0.787071	0.461516	0	0	1	1	0	0	0.00150797	1	0.690243
DDA_maxlfq_top0_top3	5	DDA	Maxquant	limma	3	0.159442	0.642537	0.284119	0.496779	0.252038	0.279569	0.250321	0.295064	0.556872	0.522105	0.0940161	0.522082	0.569657	1	1	0	0	0	0	0.415769	0	0.624804
DDA_maxlfq_top0_count	5	DDA	Maxquant	limma	3	0.66735	0.747064	0.679513	0.501932	0.664597	0.754639	0.996668	0.704091	0.711164	0.863194	0.501207	0.864545	0.626843	0	1	0	0	0	1	0.415769	0	0.524508
DDA_maxlfq_top3_count	5	DDA	Maxquant	limma	3	0.656325	0.746637	0.492014	0.511245	0.742078	0.745555	0.996034	0.743443	0.710637	0.918347	0.588409	0.864545	0.440785	0	1	0	1	0	0	0.417277	0.001552	0.112208
DDA_top0_top3_count	5	DDA	Maxquant	limma	3	0.357627	0.393124	0.683924	0.176355	0.570112	0.64303	0.979494	0.613949	0.576356	0.643535	0.536677	0.54034	0.482962	0	1	1	0	0	0	0.415769	0	0.0997997
DDA_dlfq_maxlfq_top0_top3	5	DDA	Maxquant	limma	4	0.325913	0.813421	0.444744	0.926963	0.215573	0.388291	0.323883	0.487822	0.736045	0.693762	0.181474	0.658154	0.736439	1	0	0	0	0	0	0	0.998448	0.749443
DDA_dlfq_maxlfq_top0_count	5	DDA	Maxquant	limma	4	0.684268	0.767243	0.707943	0.960285	0.538676	0.70861	0.994764	0.713091	0.720379	0.866452	0.33833	0.853442	0.513958	0	0	0	0	0	1	0	0.998448	0.755827
DDA_dlfq_maxlfq_top3_count	5	DDA	Maxquant	limma	4	0.657772	0.76687	0.625044	0.965076	0.587738	0.70055	0.993913	0.728199	0.719984	0.901443	0.400836	0.853442	0.400038	0	0	0	1	0	0	0.00150797	1	0.299178
DDA_dlfq_top0_top3_count	5	DDA	Maxquant	limma	4	0.488431	0.586269	0.700107	0.692446	0.422523	0.659465	0.974851	0.704077	0.695103	0.758039	0.409414	0.645818	0.690647	0	0	1	0	0	0	0	0.998448	0.557439
DDA_maxlfq_top0_top3_count	5	DDA	Maxquant	limma	4	0.367566	0.63234	0.534893	0.517053	0.557206	0.605698	0.988128	0.589137	0.638757	0.736795	0.430077	0.697878	0.394411	0	1	0	0	0	0	0.415769	0	0
DDA_dlfq_maxlfq_top0_top3_count	5	DDA	Maxquant	limma	5	0.449185	0.713229	0.602546	0.920562	0.464343	0.612523	0.98357	0.644465	0.702054	0.791298	0.352026	0.741747	0.465264	0	0	0	0	0	0	0	0.998448	0.361376
DDA_dlfq_maxlfq	5	DDA	Maxquant	ROTS	2	0.426219	1	0.667237	0.813499	0.475397	0.46334	0.0779062	0.303368	0.746445	0.773503	0.0789302	0.976314	0.184324	1	0	0	1	0	1	0.633994	0.639938	0.772873
DDA_dlfq_top0	5	DDA	Maxquant	ROTS	2	0.770338	0.976938	0.541884	0.621016	0	0.524405	0	0.757472	1	0.80055	0.336742	0.703183	0.76408	1	0	1	0	0	1	0	0.998448	0.973426
DDA_dlfq_top3	5	DDA	Maxquant	ROTS	2	0.680628	0.975977	0.606985	0.630946	0.0619302	0.503294	0.0563799	0.772278	0.99921	0.854505	0.505882	0.703183	0.663295	1	0	1	1	0	0	0.00172339	0.999483	0.786645
DDA_dlfq_count	5	DDA	Maxquant	ROTS	2	1	0.38533	1	0.364263	0.762869	1	0.994946	0.827391	0.442338	0.818701	0.0190427	0.84752	0.383209	0	0	1	1	0	1	0.795778	0.251423	0.875342
DDA_maxlfq_top0	5	DDA	Maxquant	ROTS	2	0.471342	0.964126	0.541203	0.504537	0.406666	0.446567	0.0800502	0.442094	0.835703	0.703102	0.154533	0.783124	0.510345	1	1	0	0	0	1	0.415769	0	0.696122
DDA_maxlfq_top3	5	DDA	Maxquant	ROTS	2	0.290071	0.963485	0	0.520856	0.323183	0.392139	0.131592	0.424805	0.834913	0.780563	0.0933388	0.783124	0.412731	1	1	0	1	0	0	0.417277	0.001552	0.810256
DDA_maxlfq_count	5	DDA	Maxquant	ROTS	2	0.908881	0.68706	0.616381	0.223201	0.903052	0.866393	1	0.764027	0.432859	0.870568	0.382506	1	0.179166	0	1	0	1	0	1	1	0.508019	0.742831
DDA_top0_top3	5	DDA	Maxquant	ROTS	2	0	0	0.311153	0	0.0262645	0	0.0662857	0.0079327	0	0	0	0	0.682027	1	1	1	0	0	0	0.415769	0	0.500776
DDA_top0_count	5	DDA	Maxquant	ROTS	2	0.730139	0.590006	0.880956	0.176184	0.684071	0.950956	0.98871	0.831733	0.864929	0.886346	0.435074	0.810511	0.543007	0	1	1	0	0	1	0.415769	0	0.849483
DDA_top3_count	5	DDA	Maxquant	ROTS	2	0.891046	0.589366	0.859662	0.179551	1	0.978134	0.990245	0.98423	0.864139	0.993671	0.775297	0.810511	0.589152	0	1	1	1	0	0	0.417277	0.001552	0.667636
DDA_dlfq_maxlfq_top0	5	DDA	Maxquant	ROTS	3	0.555594	0.980354	0.583441	0.992925	0.294021	0.478104	0.164226	0.500978	0.860716	0.759052	0.190068	0.820873	0.846837	1	0	0	0	0	1	0	0.998448	0.888906
DDA_dlfq_maxlfq_top3	5	DDA	Maxquant	ROTS	3	0.461096	0.979821	0.42474	1	0.286837	0.452924	0.213842	0.50015	0.86019	0.802857	0.22605	0.820873	0.803585	1	0	0	1	0	0	0.00150797	1	0.980027
DDA_dlfq_maxlfq_count	5	DDA	Maxquant	ROTS	3	0.779601	0.690797	0.761206	0.81656	0.713773	0.776578	0.999244	0.631595	0.540547	0.820924	0.16016	0.941278	0.50965	0	0	0	1	0	1	0.584231	0.759441	0.831631
DDA_dlfq_top0_top3	5	DDA	Maxquant	ROTS	3	0.3565	0.650972	0.486674	0.64223	0.0293982	0.342566	0.185514	0.512561	0.666403	0.551685	0.280875	0.468789	0.910755	1	0	1	0	0	0	0	0.998448	0.966448
DDA_dlfq_top0_count	5	DDA	Maxquant	ROTS	3	0.817167	0.650758	0.807614	0.686738	0.482313	0.82512	0.988322	0.805532	0.769089	0.835199	0.263619	0.787071	0.931793	0	0	1	0	0	1	0	0.998448	0.81939
DDA_dlfq_top3_count	5	DDA	Maxquant	ROTS	3	0.837916	0.650224	0.822216	0.693047	0.608266	0.827143	0.988816	0.8613	0.768562	0.888959	0.433407	0.787071	0.915097	0	0	1	1	0	0	0.00150797	1	0.921813
DDA_maxlfq_top0_top3	5	DDA	Maxquant	ROTS	3	0.159442	0.642537	0.284119	0.496779	0.252038	0.279569	0.250321	0.291611	0.556872	0.494555	0.082624	0.522082	0.844285	1	1	0	0	0	0	0.415769	0	0.663713
DDA_maxlfq_top0_count	5	DDA	Maxquant	ROTS	3	0.66735	0.747064	0.679513	0.501932	0.664597	0.754639	0.996668	0.679285	0.711164	0.820006	0.324038	0.864545	0.749546	0	1	0	0	0	1	0.415769	0	0.426682
DDA_maxlfq_top3_count	5	DDA	Maxquant	ROTS	3	0.656325	0.746637	0.492014	0.511245	0.742078	0.745555	0.996034	0.724354	0.710637	0.881601	0.417048	0.864545	0.730457	0	1	0	1	0	0	0.417277	0.001552	0.310579
DDA_top0_top3_count	5	DDA	Maxquant	ROTS	3	0.357627	0.393124	0.683924	0.176355	0.570112	0.64303	0.979494	0.607965	0.576356	0.626672	0.403457	0.54034	0.919349	0	1	1	0	0	0	0.415769	0	0.349688
DDA_dlfq_maxlfq_top0_top3	5	DDA	Maxquant	ROTS	4	0.325913	0.813421	0.444744	0.926963	0.215573	0.388291	0.323883	0.451325	0.736045	0.652037	0.194904	0.658154	0.966323	1	0	0	0	0	0	0	0.998448	0.955818
DDA_dlfq_maxlfq_top0_count	5	DDA	Maxquant	ROTS	4	0.684268	0.767243	0.707943	0.960285	0.538676	0.70861	0.994764	0.654348	0.720379	0.808795	0.234471	0.853442	0.933457	0	0	0	0	0	1	0	0.998448	0.830208
DDA_dlfq_maxlfq_top3_count	5	DDA	Maxquant	ROTS	4	0.657772	0.76687	0.625044	0.965076	0.587738	0.70055	0.993913	0.67935	0.719984	0.848585	0.309166	0.853442	0.927221	0	0	0	1	0	0	0.00150797	1	0.888538
DDA_dlfq_top0_top3_count	5	DDA	Maxquant	ROTS	4	0.488431	0.586269	0.700107	0.692446	0.422523	0.659465	0.974851	0.69684	0.695103	0.725629	0.34534	0.645818	0.989963	0	0	1	0	0	0	0	0.998448	0.817195
DDA_maxlfq_top0_top3_count	5	DDA	Maxquant	ROTS	4	0.367566	0.63234	0.534893	0.517053	0.557206	0.605698	0.988128	0.575804	0.638757	0.705708	0.306792	0.697878	0.963249	0	1	0	0	0	0	0.415769	0	0.406615
DDA_dlfq_maxlfq_top0_top3_count	5	DDA	Maxquant	ROTS	5	0.449185	0.713229	0.602546	0.920562	0.464343	0.612523	0.98357	0.611533	0.702054	0.748151	0.278135	0.741747	1	0	0	0	0	0	0	0	0.998448	0.77608
DDA_dlfq_maxlfq	6	DDA	Maxquant	limma	2	0.25548	1	0.882487	0.737523	1	0.506598	0.286158	0.308516	1	0.911896	0.217344	0.880711	0.446813	1	0	0	1	0	1	0.0862697	0	0.324359
DDA_dlfq_top0	6	DDA	Maxquant	limma	2	0.717746	0.185813	0.827591	0.284471	0.071453	0.348069	0	0.569657	0.189573	0.616065	0.36381	0	0.728637	1	0	1	0	0	1	0.072904	0.0842912	0.117998
DDA_dlfq_top3	6	DDA	Maxquant	limma	2	0.655498	0.202776	0.773542	0.34265	0.0769995	0.352834	0.0313671	0.554924	0.203791	0.614641	0.298071	0.0152284	0.788582	1	0	1	1	0	0	0.072904	0.0842912	0.287286
DDA_dlfq_count	6	DDA	Maxquant	limma	2	1	0.76754	1	0.136827	0.752006	1	0.978863	0.990788	0.890995	1	0.0467502	0.741117	0.729676	0	0	1	1	0	1	0.00425274	0.517241	0.0703468
DDA_maxlfq_top0	6	DDA	Maxquant	limma	2	0.76609	0.814187	0.741386	0.733205	0.688595	0.597369	0.400125	0.553313	0.819905	0.939653	0.950133	0.880711	0.592849	1	1	0	0	0	1	0.379101	0	0.0419136
DDA_maxlfq_top3	6	DDA	Maxquant	limma	2	0.902118	0.813416	0.616632	0.781771	0.711681	0.632336	0.372682	0.472482	0.815166	0.955692	0.750056	0.885787	0.79044	1	1	0	1	0	0	0.393074	0.0804598	0.110669
DDA_maxlfq_count	6	DDA	Maxquant	limma	2	0.953702	0.520817	0	0.0996051	0.369854	0.845563	0.996543	0.876682	0.36019	0.976645	0.0878952	1	0.42277	0	1	0	1	0	1	1	1	0.194486
DDA_top0_top3	6	DDA	Maxquant	limma	2	0	0	0.350665	0	0	0	0.0787682	0.0209546	0	0.0337783	0	0.00253808	0.789592	1	1	1	0	0	0	0.379101	0	0.0682796
DDA_top0_count	6	DDA	Maxquant	limma	2	0.861938	0.570162	0.73195	0.139292	0.475304	0.958127	0.983948	0.835143	0.7109	0.866501	0.691173	0.741117	0.657877	0	1	1	0	0	1	0.306197	0.45977	0.316764
DDA_top3_count	6	DDA	Maxquant	limma	2	0.995837	0.577872	0.698679	0.1544	0.54164	0.989331	0.986073	0.998707	0.706161	0.946555	0.51223	0.746193	0.899532	0	1	1	1	0	0	0.313487	0.582375	0.179284
DDA_dlfq_maxlfq_top0	6	DDA	Maxquant	limma	3	0.615041	0.666667	0.817155	0.950423	0.586683	0.484012	0.464363	0.477162	0.669826	0.822538	0.510429	0.58714	0.832373	1	0	0	0	0	1	0.072904	0.0842912	0.223634
DDA_dlfq_maxlfq_top3	6	DDA	Maxquant	limma	3	0.573712	0.672064	0.757554	1	0.596227	0.497256	0.434468	0.445307	0.672986	0.827409	0.421824	0.593909	0.871458	1	0	0	1	0	0	0.072904	0.0842912	0.136058
DDA_dlfq_maxlfq_count	6	DDA	Maxquant	limma	3	0.685701	0.762786	0.627496	0.672722	0.707287	0.784054	0.997817	0.725329	0.750395	0.962847	0.11733	0.873942	0.62958	0	0	0	1	0	1	0.00425274	0.517241	0.287286
DDA_dlfq_top0_top3	6	DDA	Maxquant	limma	3	0.46095	0.12953	0.650599	0.344266	0.0494842	0.233635	0.17044	0.381845	0.131122	0.421494	0.220627	0.00592216	0.846653	1	0	1	0	0	0	0.072904	0.0842912	0.0908552
DDA_dlfq_top0_count	6	DDA	Maxquant	limma	3	0.788091	0.507839	0.85318	0.41343	0.432921	0.768732	0.989484	0.79853	0.597156	0.827522	0.367244	0.494078	0.674777	0	0	1	0	0	1	0	0.544061	0.255748
DDA_dlfq_top3_count	6	DDA	Maxquant	limma	3	0.748505	0.516063	0.824074	0.457116	0.456882	0.780722	0.990235	0.84814	0.600316	0.853732	0.285684	0.500846	0.976618	0	0	1	1	0	0	0	0.544061	0.12251
DDA_maxlfq_top0_top3	6	DDA	Maxquant	limma	3	0.304245	0.542534	0.569561	0.749394	0.466759	0.409902	0.530733	0.348916	0.545024	0.643041	0.56673	0.589679	0.826297	1	1	0	0	0	0	0.379101	0	0.0610104
DDA_maxlfq_top0_count	6	DDA	Maxquant	limma	3	0.854487	0.635055	0.491112	0.670393	0.511251	0.800353	0.998937	0.755046	0.630332	0.9276	0.5764	0.873942	0.578389	0	1	0	0	0	1	0.306197	0.45977	0.204239
DDA_maxlfq_top3_count	6	DDA	Maxquant	limma	3	0.944959	0.637368	0.438437	0.704358	0.541058	0.82241	0.998536	0.782623	0.627172	0.95963	0.45006	0.877327	0.985326	0	1	0	1	0	0	0.313487	0.582375	0.0166517
DDA_top0_top3_count	6	DDA	Maxquant	limma	3	0.349194	0.382678	0.593764	0.223591	0.338982	0.649153	0.993072	0.618268	0.472354	0.615611	0.401134	0.496616	0.981277	0	1	1	0	0	0	0.306197	0.45977	0.172768
DDA_dlfq_maxlfq_top0_top3	6	DDA	Maxquant	limma	4	0.488573	0.502699	0.698717	0.925609	0.424788	0.406201	0.562129	0.413308	0.504739	0.678621	0.429902	0.444162	0.801679	1	0	0	0	0	0	0.072904	0.0842912	0.0785192
DDA_dlfq_maxlfq_top0_count	6	DDA	Maxquant	limma	4	0.715174	0.643087	0.697236	0.855611	0.559535	0.709288	0.999409	0.689017	0.661927	0.885127	0.392851	0.707276	0.617556	0	0	0	0	0	1	0	0.544061	0.153156
DDA_dlfq_maxlfq_top3_count	6	DDA	Maxquant	limma	4	0.681347	0.64707	0.66189	0.891215	0.575363	0.72111	0.999051	0.70035	0.662717	0.900905	0.318724	0.711506	1	0	0	0	1	0	0	0	0.544061	0.241231
DDA_dlfq_top0_top3_count	6	DDA	Maxquant	limma	4	0.585703	0.384027	0.730404	0.432801	0.319567	0.60806	0.994861	0.661696	0.450237	0.67959	0.318672	0.374365	0.995613	0	0	1	0	0	0	0	0.544061	0.0999646
DDA_maxlfq_top0_top3_count	6	DDA	Maxquant	limma	4	0.445194	0.549409	0.523219	0.703934	0.464512	0.670454	0.999772	0.626213	0.56872	0.786471	0.498581	0.709391	0.99339	0	1	0	0	0	0	0.306197	0.45977	0.0966215
DDA_dlfq_maxlfq_top0_top3_count	6	DDA	Maxquant	limma	5	0.582547	0.545258	0.662293	0.854269	0.468753	0.623023	1	0.618117	0.569668	0.786142	0.391746	0.58934	0.988419	0	0	0	0	0	0	0	0.544061	0
DDA_dlfq_maxlfq	6	DDA	Maxquant	ROTS	2	0.25548	1	0.882487	0.737523	1	0.506598	0.286158	0.245286	1	0.892193	0.33261	0.880711	0.741379	1	0	0	1	0	1	0.0862697	0	0.76266
DDA_dlfq_top0	6	DDA	Maxquant	ROTS	2	0.717746	0.185813	0.827591	0.284471	0.071453	0.348069	0	0.482491	0.189573	0.544556	0.367423	0	0.772946	1	0	1	0	0	1	0.072904	0.0842912	0.553435
DDA_dlfq_top3	6	DDA	Maxquant	ROTS	2	0.655498	0.202776	0.773542	0.34265	0.0769995	0.352834	0.0313671	0.554453	0.203791	0.576104	0.334676	0.0152284	0.546627	1	0	1	1	0	0	0.072904	0.0842912	0.592683
DDA_dlfq_count	6	DDA	Maxquant	ROTS	2	1	0.76754	1	0.136827	0.752006	1	0.978863	0.985289	0.890995	0.979217	0.101534	0.741117	0.12839	0	0	1	1	0	1	0.00425274	0.517241	1
DDA_maxlfq_top0	6	DDA	Maxquant	ROTS	2	0.76609	0.814187	0.741386	0.733205	0.688595	0.597369	0.400125	0.550291	0.819905	0.915968	1	0.880711	0.798743	1	1	0	0	0	1	0.379101	0	0.373407
DDA_maxlfq_top3	6	DDA	Maxquant	ROTS	2	0.902118	0.813416	0.616632	0.781771	0.711681	0.632336	0.372682	0.473531	0.815166	0.945	0.735834	0.885787	0.492244	1	1	0	1	0	0	0.393074	0.0804598	0.73415
DDA_maxlfq_count	6	DDA	Maxquant	ROTS	2	0.953702	0.520817	0	0.0996051	0.369854	0.845563	0.996543	0.875602	0.36019	0.965276	0.0659048	1	0	0	1	0	1	0	1	1	1	0.847474
DDA_top0_top3	6	DDA	Maxquant	ROTS	2	0	0	0.350665	0	0	0	0.0787682	0	0	0	0.0238495	0.00253808	0.535988	1	1	1	0	0	0	0.379101	0	0.18797
DDA_top0_count	6	DDA	Maxquant	ROTS	2	0.861938	0.570162	0.73195	0.139292	0.475304	0.958127	0.983948	0.817095	0.7109	0.847874	0.70026	0.741117	0.161747	0	1	1	0	0	1	0.306197	0.45977	0.737552
DDA_top3_count	6	DDA	Maxquant	ROTS	2	0.995837	0.577872	0.698679	0.1544	0.54164	0.989331	0.986073	1	0.706161	0.941493	0.496998	0.746193	0.517186	0	1	1	1	0	0	0.313487	0.582375	0.723039
DDA_dlfq_maxlfq_top0	6	DDA	Maxquant	ROTS	3	0.615041	0.666667	0.817155	0.950423	0.586683	0.484012	0.464363	0.426023	0.669826	0.784239	0.566678	0.58714	0.654139	1	0	0	0	0	1	0.072904	0.0842912	0.469041
DDA_dlfq_maxlfq_top3	6	DDA	Maxquant	ROTS	3	0.573712	0.672064	0.757554	1	0.596227	0.497256	0.434468	0.424423	0.672986	0.804432	0.467707	0.593909	0.648672	1	0	0	1	0	0	0.072904	0.0842912	0.462621
DDA_dlfq_maxlfq_count	6	DDA	Maxquant	ROTS	3	0.685701	0.762786	0.627496	0.672722	0.707287	0.784054	0.997817	0.702059	0.750395	0.945562	0.166683	0.873942	0.333764	0	0	0	1	0	1	0.00425274	0.517241	0.64899
DDA_dlfq_top0_top3	6	DDA	Maxquant	ROTS	3	0.46095	0.12953	0.650599	0.344266	0.0494842	0.233635	0.17044	0.345648	0.131122	0.373553	0.241983	0.00592216	0.764634	1	0	1	0	0	0	0.072904	0.0842912	0.293931
DDA_dlfq_top0_count	6	DDA	Maxquant	ROTS	3	0.788091	0.507839	0.85318	0.41343	0.432921	0.768732	0.989484	0.761625	0.597156	0.790549	0.389739	0.494078	0.42287	0	0	1	0	0	1	0	0.544061	0.569808
DDA_dlfq_top3_count	6	DDA	Maxquant	ROTS	3	0.748505	0.516063	0.824074	0.457116	0.456882	0.780722	0.990235	0.846581	0.600316	0.832271	0.31107	0.500846	0.741695	0	0	1	1	0	0	0	0.544061	0.572756
DDA_maxlfq_top0_top3	6	DDA	Maxquant	ROTS	3	0.304245	0.542534	0.569561	0.749394	0.466759	0.409902	0.530733	0.341274	0.545024	0.620323	0.586561	0.589679	0.597559	1	1	0	0	0	0	0.379101	0	0.537851
DDA_maxlfq_top0_count	6	DDA	Maxquant	ROTS	3	0.854487	0.635055	0.491112	0.670393	0.511251	0.800353	0.998937	0.747663	0.630332	0.909706	0.588721	0.873942	0.376391	0	1	0	0	0	1	0.306197	0.45977	0.637725
DDA_maxlfq_top3_count	6	DDA	Maxquant	ROTS	3	0.944959	0.637368	0.438437	0.704358	0.541058	0.82241	0.998536	0.783044	0.627172	0.95059	0.432912	0.877327	0.78503	0	1	0	1	0	0	0.313487	0.582375	0.63221
DDA_top0_top3_count	6	DDA	Maxquant	ROTS	3	0.349194	0.382678	0.593764	0.223591	0.338982	0.649153	0.993072	0.605698	0.472354	0.596456	0.407036	0.496616	0.760584	0	1	1	0	0	0	0.306197	0.45977	0.320117
DDA_dlfq_maxlfq_top0_top3	6	DDA	Maxquant	ROTS	4	0.488573	0.502699	0.698717	0.925609	0.424788	0.406201	0.562129	0.384342	0.504739	0.645637	0.465732	0.444162	0.859777	1	0	0	0	0	0	0.072904	0.0842912	0.250752
DDA_dlfq_maxlfq_top0_count	6	DDA	Maxquant	ROTS	4	0.715174	0.643087	0.697236	0.855611	0.559535	0.709288	0.999409	0.659342	0.661927	0.857514	0.427955	0.707276	0.426059	0	0	0	0	0	1	0	0.544061	0.542868
DDA_dlfq_maxlfq_top3_count	6	DDA	Maxquant	ROTS	4	0.681347	0.64707	0.66189	0.891215	0.575363	0.72111	0.999051	0.689027	0.662717	0.883214	0.344593	0.711506	0.768576	0	0	0	1	0	0	0	0.544061	0.527511
DDA_dlfq_top0_top3_count	6	DDA	Maxquant	ROTS	4	0.585703	0.384027	0.730404	0.432801	0.319567	0.60806	0.994861	0.639888	0.450237	0.648207	0.337457	0.374365	0.696689	0	0	1	0	0	0	0	0.544061	0.244835
DDA_maxlfq_top0_top3_count	6	DDA	Maxquant	ROTS	4	0.445194	0.549409	0.523219	0.703934	0.464512	0.670454	0.999772	0.61942	0.56872	0.769268	0.503808	0.709391	0.801557	0	1	0	0	0	0	0.306197	0.45977	0.360326
DDA_dlfq_maxlfq_top0_top3_count	6	DDA	Maxquant	ROTS	5	0.582547	0.545258	0.662293	0.854269	0.468753	0.623023	1	0.598404	0.569668	0.760768	0.415909	0.58934	0.633333	0	0	0	0	0	0	0	0.544061	0.316001
DDA_dlfq_maxlfq	7	DDA	Maxquant	limma	2	0.628288	1	0.753895	0.737649	0.972586	0.531238	0.263513	0.539522	0.885906	0.877995	0.830199	0.736111	0.473161	1	0	0	1	0	1	0.0715949	0	1
DDA_dlfq_top0	7	DDA	Maxquant	limma	2	0.742219	0.204555	0.553702	0.279439	0.113335	0.478767	0	0.47583	0.174497	0.364829	0.284995	0	0.387012	1	0	1	0	0	1	0.0535506	0.0714286	0.83472
DDA_dlfq_top3	7	DDA	Maxquant	limma	2	0.675921	0.217739	0.589051	0.327836	0.100671	0.417741	0.0381308	0.337115	0.190157	0.411068	0.232512	0.0162037	0.355906	1	0	1	1	0	0	0.0541327	0.0691244	0.845569
DDA_dlfq_count	7	DDA	Maxquant	limma	2	1	0.886137	1	0.272799	1	1	0.991499	0.872327	1	0.985188	0.165248	0.842593	0	0	0	1	1	0	1	0.0064028	0.258065	0.803666
DDA_maxlfq_top0	7	DDA	Maxquant	limma	2	0.87304	0.806233	0.606192	0.736515	0.745367	0.585699	0.351965	0.376423	0.695749	0.8422	0.655145	0.736111	0.111077	1	1	0	0	0	1	0.3539	0	0.0832442
DDA_maxlfq_top3	7	DDA	Maxquant	limma	2	0.783464	0.801838	0.354545	0.787062	0.735355	0.556782	0.293495	0.202286	0.693512	0.860522	0.434059	0.743056	0.305221	1	1	0	1	0	0	0.367288	0.0276498	0.105379
DDA_maxlfq_count	7	DDA	Maxquant	limma	2	0.864576	0.536157	0	0.260423	0.429984	0.823392	0.998802	1	0.402685	1	0.263318	1	0.236052	0	1	0	1	0	1	1	1	0.000858273
DDA_top0_top3	7	DDA	Maxquant	limma	2	0	0	0.195505	0	0	0	0.0808092	0	0	0.00347966	0.0111528	0.0162037	0.352877	1	1	1	0	0	0	0.3539	0	0.58006
DDA_top0_count	7	DDA	Maxquant	limma	2	0.649367	0.676388	0.753551	0.27262	0.681167	0.909734	0.992987	0.793775	0.809843	0.888426	0.373598	0.842593	0.515199	0	1	1	0	0	1	0.300349	0.211982	0.739888
DDA_top3_count	7	DDA	Maxquant	limma	2	0.755076	0.675989	0.711774	0.295991	0.813072	0.930338	0.995493	0.947933	0.803132	0.965677	0.217986	0.847222	0.474764	0	1	1	1	0	0	0.310827	0.251152	0.980016
DDA_dlfq_maxlfq_top0	7	DDA	Maxquant	limma	3	0.711503	0.670262	0.637929	0.878048	0.610429	0.531901	0.450133	0.463925	0.585384	0.695008	0.590113	0.490741	0.216381	1	0	0	0	0	1	0.0535506	0.0714286	0.669557
DDA_dlfq_maxlfq_top3	7	DDA	Maxquant	limma	3	0.6356	0.673192	0.56583	0.923908	0.602871	0.50192	0.399293	0.359641	0.589858	0.716528	0.498923	0.498457	0.465216	1	0	0	1	0	0	0.0541327	0.0691244	0.856685
DDA_dlfq_maxlfq_count	7	DDA	Maxquant	limma	3	0.804513	0.807431	0.584632	0.736086	0.800857	0.784877	0.999335	0.80395	0.762864	0.954394	0.419589	0.859568	0.289913	0	0	0	1	0	1	0.0064028	0.258065	0.938278
DDA_dlfq_top0_top3	7	DDA	Maxquant	limma	3	0.476361	0.140764	0.446086	0.334302	0.0713356	0.298836	0.17358	0.270982	0.121551	0.259792	0.17622	0.0108025	0.423009	1	0	1	0	0	0	0.0535506	0.0714286	1
DDA_dlfq_top0_count	7	DDA	Maxquant	limma	3	0.751871	0.589027	0.769084	0.503202	0.598167	0.796167	0.995545	0.713978	0.661447	0.746148	0.274614	0.561728	0.444263	0	0	1	0	0	1	0	0.28341	0.756356
DDA_dlfq_top3_count	7	DDA	Maxquant	limma	3	0.71517	0.593288	0.766942	0.548506	0.637914	0.782693	0.996864	0.719125	0.66443	0.787311	0.205249	0.568673	0.199525	0	0	1	1	0	0	0	0.28341	0.697915
DDA_maxlfq_top0_top3	7	DDA	Maxquant	limma	3	0.381745	0.536023	0.385414	0.690587	0.493574	0.380827	0.477047	0.192903	0.463087	0.568734	0.366786	0.498457	0.309534	1	1	0	0	0	0	0.3539	0	0.0399519
DDA_maxlfq_top0_count	7	DDA	Maxquant	limma	3	0.809001	0.672926	0.453247	0.738959	0.618839	0.772942	0.999661	0.723399	0.636092	0.910209	0.430687	0.859568	0.19744	0	1	0	0	0	1	0.300349	0.211982	0.0630386
DDA_maxlfq_top3_count	7	DDA	Maxquant	limma	3	0.816694	0.671328	0.35544	0.78499	0.65947	0.770171	0.999331	0.71674	0.63311	0.942066	0.305121	0.863426	0.0995003	0	1	0	1	0	0	0.309662	0.25576	0
DDA_top0_top3_count	7	DDA	Maxquant	limma	3	0.29529	0.450792	0.55361	0.313684	0.49808	0.613357	0.997703	0.580569	0.537658	0.619194	0.200912	0.568673	0.369658	0	1	1	0	0	0	0.300349	0.211982	0.305483
DDA_dlfq_maxlfq_top0_top3	7	DDA	Maxquant	limma	4	0.551495	0.505061	0.508815	0.858783	0.444552	0.428371	0.54521	0.321863	0.43997	0.560016	0.40801	0.374614	0.435765	1	0	0	0	0	0	0.0535506	0.0714286	0.561287
DDA_dlfq_maxlfq_top0_count	7	DDA	Maxquant	limma	4	0.73579	0.684911	0.611223	0.939494	0.657073	0.721472	0.99986	0.676313	0.661447	0.82644	0.428751	0.692901	0.132205	0	0	0	0	0	1	0	0.28341	0.757433
DDA_dlfq_maxlfq_top3_count	7	DDA	Maxquant	limma	4	0.688633	0.68631	0.568211	0.983242	0.675278	0.709915	0.999609	0.649864	0.662565	0.850075	0.35722	0.697531	0.354904	0	0	0	1	0	0	0	0.28341	0.793782
DDA_dlfq_top0_top3_count	7	DDA	Maxquant	limma	4	0.560448	0.443468	0.63393	0.577346	0.451374	0.622763	0.998285	0.571163	0.496271	0.603111	0.214249	0.427469	0.445518	0	0	1	0	0	0	0	0.28341	0.926567
DDA_maxlfq_top0_top3_count	7	DDA	Maxquant	limma	4	0.465823	0.582767	0.436928	0.764991	0.567491	0.634324	0.999862	0.553403	0.567487	0.760051	0.325877	0.697531	0.170136	0	1	0	0	0	0	0.300349	0.211982	0.046912
DDA_dlfq_maxlfq_top0_top3_count	7	DDA	Maxquant	limma	5	0.60044	0.580503	0.551821	1	0.559154	0.623369	1	0.554521	0.565548	0.719939	0.346821	0.578009	0.31716	0	0	0	0	0	0	0	0.28341	0.573431
DDA_dlfq_maxlfq	7	DDA	Maxquant	ROTS	2	0.628288	1	0.753895	0.737649	0.972586	0.531238	0.263513	0.609654	0.885906	0.783348	1	0.736111	0.599699	1	0	0	1	0	1	0.0715949	0	0.926567
DDA_dlfq_top0	7	DDA	Maxquant	ROTS	2	0.742219	0.204555	0.553702	0.279439	0.113335	0.478767	0	0.467397	0.174497	0.242757	0.359564	0	0.416397	1	0	1	0	0	1	0.0535506	0.0714286	0.646821
DDA_dlfq_top3	7	DDA	Maxquant	ROTS	2	0.675921	0.217739	0.589051	0.327836	0.100671	0.417741	0.0381308	0.290497	0.190157	0.275313	0.333348	0.0162037	0.509135	1	0	1	1	0	0	0.0541327	0.0691244	0.904048
DDA_dlfq_count	7	DDA	Maxquant	ROTS	2	1	0.886137	1	0.272799	1	1	0.991499	0.787016	1	0.906073	0.36496	0.842593	0.142119	0	0	1	1	0	1	0.0064028	0.258065	0.954631
DDA_maxlfq_top0	7	DDA	Maxquant	ROTS	2	0.87304	0.806233	0.606192	0.736515	0.745367	0.585699	0.351965	0.292487	0.695749	0.812267	0.422518	0.736111	0.447281	1	1	0	0	0	1	0.3539	0	0.390185
DDA_maxlfq_top3	7	DDA	Maxquant	ROTS	2	0.783464	0.801838	0.354545	0.787062	0.735355	0.556782	0.293495	0.127337	0.693512	0.825085	0.297318	0.743056	0.993761	1	1	0	1	0	0	0.367288	0.0276498	0.501077
DDA_maxlfq_count	7	DDA	Maxquant	ROTS	2	0.864576	0.536157	0	0.260423	0.429984	0.823392	0.998802	0.955329	0.402685	0.969889	0.203238	1	0.755878	0	1	0	1	0	1	1	1	0.211402
DDA_top0_top3	7	DDA	Maxquant	ROTS	2	0	0	0.195505	0	0	0	0.0808092	0.0199065	0	0	0	0.0162037	0.688866	1	1	1	0	0	0	0.3539	0	0.871157
DDA_top0_count	7	DDA	Maxquant	ROTS	2	0.649367	0.676388	0.753551	0.27262	0.681167	0.909734	0.992987	0.840966	0.809843	0.903943	0.342392	0.842593	0.974829	0	1	1	0	0	1	0.300349	0.211982	0.96287
DDA_top3_count	7	DDA	Maxquant	ROTS	2	0.755076	0.675989	0.711774	0.295991	0.813072	0.930338	0.995493	0.971225	0.803132	0.964856	0.224136	0.847222	0.304363	0	1	1	1	0	0	0.310827	0.251152	0.997779
DDA_dlfq_maxlfq_top0	7	DDA	Maxquant	ROTS	3	0.711503	0.670262	0.637929	0.878048	0.610429	0.531901	0.450133	0.456512	0.585384	0.612791	0.594027	0.490741	0.495326	1	0	0	0	0	1	0.0535506	0.0714286	0.730299
DDA_dlfq_maxlfq_top3	7	DDA	Maxquant	ROTS	3	0.6356	0.673192	0.56583	0.923908	0.602871	0.50192	0.399293	0.342496	0.589858	0.627915	0.543555	0.498457	0.870919	1	0	0	1	0	0	0.0541327	0.0691244	0.942991
DDA_dlfq_maxlfq_count	7	DDA	Maxquant	ROTS	3	0.804513	0.807431	0.584632	0.736086	0.800857	0.784877	0.999335	0.784	0.762864	0.886437	0.522733	0.859568	0.686807	0	0	0	1	0	1	0.0064028	0.258065	0.940395
DDA_dlfq_top0_top3	7	DDA	Maxquant	ROTS	3	0.476361	0.140764	0.446086	0.334302	0.0713356	0.298836	0.17358	0.259267	0.121551	0.17269	0.23097	0.0108025	0.656404	1	0	1	0	0	0	0.0535506	0.0714286	0.942991
DDA_dlfq_top0_count	7	DDA	Maxquant	ROTS	3	0.751871	0.589027	0.769084	0.503202	0.598167	0.796167	0.995545	0.69846	0.661447	0.684258	0.355639	0.561728	0.58582	0	0	1	0	0	1	0	0.28341	0.954631
DDA_dlfq_top3_count	7	DDA	Maxquant	ROTS	3	0.71517	0.593288	0.766942	0.548506	0.637914	0.782693	0.996864	0.682913	0.66443	0.715414	0.307481	0.568673	0.40589	0	0	1	1	0	0	0	0.28341	0.940395
DDA_maxlfq_top0_top3	7	DDA	Maxquant	ROTS	3	0.381745	0.536023	0.385414	0.690587	0.493574	0.380827	0.477047	0.146577	0.463087	0.545784	0.239945	0.498457	0.475344	1	1	0	0	0	0	0.3539	0	0.0829529
DDA_maxlfq_top0_count	7	DDA	Maxquant	ROTS	3	0.809001	0.672926	0.453247	0.738959	0.618839	0.772942	0.999661	0.696261	0.636092	0.895366	0.322716	0.859568	0.384977	0	1	0	0	0	1	0.300349	0.211982	0.0159911
DDA_maxlfq_top3_count	7	DDA	Maxquant	ROTS	3	0.816694	0.671328	0.35544	0.78499	0.65947	0.770171	0.999331	0.68463	0.63311	0.919943	0.241564	0.863426	1	0	1	0	1	0	0	0.309662	0.25576	0.148654
DDA_top0_top3_count	7	DDA	Maxquant	ROTS	3	0.29529	0.450792	0.55361	0.313684	0.49808	0.613357	0.997703	0.610699	0.537658	0.622933	0.188843	0.568673	0.637703	0	1	1	0	0	0	0.300349	0.211982	0.67354
DDA_dlfq_maxlfq_top0_top3	7	DDA	Maxquant	ROTS	4	0.551495	0.505061	0.508815	0.858783	0.444552	0.428371	0.54521	0.301213	0.43997	0.489795	0.402125	0.374614	0.495959	1	0	0	0	0	0	0.0535506	0.0714286	0.83472
DDA_dlfq_maxlfq_top0_count	7	DDA	Maxquant	ROTS	4	0.73579	0.684911	0.611223	0.939494	0.657073	0.721472	0.99986	0.658808	0.661447	0.769713	0.448779	0.692901	0.411681	0	0	0	0	0	1	0	0.28341	0.856685
DDA_dlfq_maxlfq_top3_count	7	DDA	Maxquant	ROTS	4	0.688633	0.68631	0.568211	0.983242	0.675278	0.709915	0.999609	0.62351	0.662565	0.787427	0.403833	0.697531	0.896596	0	0	0	1	0	0	0	0.28341	0.969295
DDA_dlfq_top0_top3_count	7	DDA	Maxquant	ROTS	4	0.560448	0.443468	0.63393	0.577346	0.451374	0.622763	0.998285	0.562835	0.496271	0.548824	0.270733	0.427469	0.478915	0	0	1	0	0	0	0	0.28341	0.65373
DDA_maxlfq_top0_top3_count	7	DDA	Maxquant	ROTS	4	0.465823	0.582767	0.436928	0.764991	0.567491	0.634324	0.999862	0.534542	0.567487	0.746007	0.248267	0.697531	0.35724	0	1	0	0	0	0	0.300349	0.211982	0.0552113
DDA_dlfq_maxlfq_top0_top3_count	7	DDA	Maxquant	ROTS	5	0.60044	0.580503	0.551821	1	0.559154	0.623369	1	0.536181	0.565548	0.668353	0.354747	0.578009	0.446156	0	0	0	0	0	0	0	0.28341	0.902168
DDA_dlfq_maxlfq	9	DDA	Maxquant	limma	2	0	1	0.920587	0.852798	1	0.237014	0.118273	0.0585863	1	0.949618	0.892259	0.957802	0.358743	1	0	0	1	0	1	0.0561836	0	0.476181
DDA_dlfq_top0	9	DDA	Maxquant	limma	2	0.549356	0.234116	0.943538	0.364361	0.070185	0.659223	0	0.27108	0.232724	0.368733	0.0520217	0.00490677	0.504343	1	0	1	0	0	1	0.0494688	0.0648072	0.778624
DDA_dlfq_top3	9	DDA	Maxquant	limma	2	0.371221	0.23958	0.963733	0.383558	0.0686423	0.551259	0.0688503	0.0304118	0.232724	0.377653	0.00573646	0.00490677	0.185481	1	0	1	1	0	0	0.0496388	0.0631665	0.853435
DDA_dlfq_count	9	DDA	Maxquant	limma	2	1	0.721365	1	0.222997	0.226883	0.990293	0.99067	0.943493	0.675933	1	0.355224	0.551521	0.0603735	0	0	1	1	0	1	0.00314492	0.511895	0.595045
DDA_maxlfq_top0	9	DDA	Maxquant	limma	2	0.546779	0.76867	0.597093	0.818927	0.603159	0.576744	0.233577	0.462447	0.775218	0.894209	0.982469	0.957802	0.108712	1	1	0	0	0	1	0.423204	0	0.186335
DDA_maxlfq_top3	9	DDA	Maxquant	limma	2	0.450077	0.766099	0.527094	0.843025	0.597716	0.551352	0.215738	0.301365	0.775218	0.892829	1	0.957802	0.061446	1	1	0	1	0	0	0.429749	0.02379	0.206442
DDA_maxlfq_count	9	DDA	Maxquant	limma	2	0.929827	0.470428	0	0.189298	0.394675	0.741167	0.999983	0.853736	0.401906	0.991954	0.120941	1	0.256622	0	1	0	1	0	1	1	1	0
DDA_top0_top3	9	DDA	Maxquant	limma	2	0.101301	0	0.147614	0	0	0	0.0291838	0.0397053	0	0	0.0182089	0	0.490626	1	1	1	0	0	0	0.423204	0	0.741172
DDA_top0_count	9	DDA	Maxquant	limma	2	0.841668	0.485535	0.369118	0.209174	0.0592686	0.954567	0.994181	0.841307	0.449563	0.856957	0.443155	0.55054	0.698756	0	1	1	0	0	1	0.373736	0.477441	0.287585
DDA_top3_count	9	DDA	Maxquant	limma	2	0.986334	0.486392	0.361991	0.218812	0.0745548	1	0.995405	0.982407	0.449563	0.883725	0.424711	0.55054	0.645294	0	1	1	1	0	0	0.377561	0.527482	0.492481
DDA_dlfq_maxlfq_top0	9	DDA	Maxquant	limma	3	0.413005	0.667595	0.820406	0.972279	0.557781	0.490994	0.177438	0.264038	0.669314	0.73752	0.64225	0.64017	0.569568	1	0	0	0	0	1	0.0494688	0.0648072	0.790445
DDA_dlfq_maxlfq_top3	9	DDA	Maxquant	limma	3	0.24938	0.66856	0.803804	0.991679	0.555453	0.446541	0.184654	0.130121	0.669314	0.740033	0.632665	0.64017	0.293004	1	0	0	1	0	0	0.0496388	0.0631665	0.780984
DDA_dlfq_maxlfq_count	9	DDA	Maxquant	limma	3	0.677387	0.730598	0.640196	0.73573	0.54052	0.656158	0.999187	0.618605	0.692613	0.980524	0.456141	0.836441	0.232107	0	0	0	1	0	1	0.00314492	0.511895	0.707246
DDA_dlfq_top0_top3	9	DDA	Maxquant	limma	3	0.341281	0.157898	0.684962	0.382046	0.0462758	0.403494	0.161131	0.113732	0.15515	0.248795	0.0253223	0.00327119	0.360906	1	0	1	0	0	0	0.0494688	0.0648072	1
DDA_dlfq_top0_count	9	DDA	Maxquant	limma	3	0.685523	0.480339	0.770885	0.529371	0.118779	0.868027	0.99112	0.685293	0.45274	0.741897	0.283467	0.368989	0.410905	0	0	1	0	0	1	0	0.542248	0.846573
DDA_dlfq_top3_count	9	DDA	Maxquant	limma	3	0.591187	0.482446	0.775241	0.548071	0.12336	0.847184	0.991828	0.652104	0.45274	0.753793	0.261891	0.368989	0.242767	0	0	1	1	0	0	0.000169992	0.540607	0.940872
DDA_maxlfq_top0_top3	9	DDA	Maxquant	limma	3	0.261459	0.51159	0.423934	0.710102	0.400292	0.376032	0.252633	0.267839	0.516812	0.595679	0.666893	0.638535	0.349036	1	1	0	0	0	0	0.423204	0	0.153598
DDA_maxlfq_top0_count	9	DDA	Maxquant	limma	3	0.787265	0.574878	0.32207	0.710864	0.352368	0.757493	1	0.719163	0.542229	0.914374	0.515522	0.836114	0.493743	0	1	0	0	0	1	0.373736	0.477441	0.423917
DDA_maxlfq_top3_count	9	DDA	Maxquant	limma	3	0.805782	0.574306	0.296362	0.732048	0.355649	0.764173	0.999896	0.712503	0.542229	0.922836	0.515217	0.836114	0.558844	0	1	0	1	0	0	0.377306	0.529943	0.0376121
DDA_top0_top3_count	9	DDA	Maxquant	limma	3	0.467578	0.323976	0.292908	0.270377	0.0446078	0.651522	0.995357	0.62114	0.299709	0.580228	0.295358	0.367027	1	0	1	1	0	0	0	0.373736	0.477441	0.532547
DDA_dlfq_maxlfq_top0_top3	9	DDA	Maxquant	limma	4	0.316789	0.501411	0.683276	0.932604	0.38995	0.429265	0.217188	0.193933	0.502648	0.580507	0.491783	0.480536	0.421106	1	0	0	0	0	0	0.0494688	0.0648072	0.937727
DDA_dlfq_maxlfq_top0_count	9	DDA	Maxquant	limma	4	0.591599	0.613352	0.638389	0.949189	0.392362	0.693168	0.999032	0.571775	0.589224	0.843579	0.474345	0.670429	0.426446	0	0	0	0	0	1	0	0.542248	0.721403
DDA_dlfq_maxlfq_top3_count	9	DDA	Maxquant	limma	4	0.484745	0.613977	0.628901	0.967526	0.393745	0.678514	0.998785	0.528333	0.589224	0.849297	0.466479	0.670429	0.326248	0	0	0	1	0	0	0.000169992	0.540607	0.805086
DDA_dlfq_top0_top3_count	9	DDA	Maxquant	limma	4	0.521579	0.361165	0.630999	0.598267	0.0832557	0.692557	0.991078	0.518067	0.340085	0.581178	0.21651	0.277069	0.633406	0	0	1	0	0	0	0	0.542248	0.849663
DDA_maxlfq_top0_top3_count	9	DDA	Maxquant	limma	4	0.478995	0.496187	0.333818	0.751187	0.288229	0.637305	0.999769	0.580161	0.475245	0.753279	0.498248	0.669447	0.925509	0	1	0	0	0	0	0.373736	0.477441	0.486808
DDA_dlfq_maxlfq_top0_top3_count	9	DDA	Maxquant	limma	5	0.478907	0.517218	0.583077	1	0.309508	0.626162	0.998463	0.478454	0.499285	0.721568	0.429473	0.553582	0.588086	0	0	0	0	0	0	0	0.542248	0.809536
DDA_dlfq_maxlfq	9	DDA	Maxquant	ROTS	2	0	1	0.920587	0.852798	1	0.237014	0.118273	0	1	0.930687	0.864869	0.957802	0.856491	1	0	0	1	0	1	0.0561836	0	0.614893
DDA_dlfq_top0	9	DDA	Maxquant	ROTS	2	0.549356	0.234116	0.943538	0.364361	0.070185	0.659223	0	0.265069	0.232724	0.356847	0.0563878	0.00490677	0.291762	1	0	1	0	0	1	0.0494688	0.0648072	0.735729
DDA_dlfq_top3	9	DDA	Maxquant	ROTS	2	0.371221	0.23958	0.963733	0.383558	0.0686423	0.551259	0.0688503	0.0139402	0.232724	0.37287	0	0.00490677	0.292141	1	0	1	1	0	0	0.0496388	0.0631665	0.883774
DDA_dlfq_count	9	DDA	Maxquant	ROTS	2	1	0.721365	1	0.222997	0.226883	0.990293	0.99067	0.937116	0.675933	0.993246	0.434629	0.551521	0.579712	0	0	1	1	0	1	0.00314492	0.511895	0.682132
DDA_maxlfq_top0	9	DDA	Maxquant	ROTS	2	0.546779	0.76867	0.597093	0.818927	0.603159	0.576744	0.233577	0.4067	0.775218	0.878487	0.789702	0.957802	0.674172	1	1	0	0	0	1	0.423204	0	0.172345
DDA_maxlfq_top3	9	DDA	Maxquant	ROTS	2	0.450077	0.766099	0.527094	0.843025	0.597716	0.551352	0.215738	0.225862	0.775218	0.879831	0.835506	0.957802	0.504593	1	1	0	1	0	0	0.429749	0.02379	0.260123
DDA_maxlfq_count	9	DDA	Maxquant	ROTS	2	0.929827	0.470428	0	0.189298	0.394675	0.741167	0.999983	0.819802	0.401906	0.975261	0.0993876	1	0.321278	0	1	0	1	0	1	1	1	0.241952
DDA_top0_top3	9	DDA	Maxquant	ROTS	2	0.101301	0	0.147614	0	0	0	0.0291838	0.0574736	0	0.0287203	0.0209116	0	0.513269	1	1	1	0	0	0	0.423204	0	0.389477
DDA_top0_count	9	DDA	Maxquant	ROTS	2	0.841668	0.485535	0.369118	0.209174	0.0592686	0.954567	0.994181	0.862451	0.449563	0.863936	0.400488	0.55054	0.063346	0	1	1	0	0	1	0.373736	0.477441	0.287642
DDA_top3_count	9	DDA	Maxquant	ROTS	2	0.986334	0.486392	0.361991	0.218812	0.0745548	1	0.995405	1	0.449563	0.894819	0.407866	0.55054	0	0	1	1	1	0	0	0.377561	0.527482	0.351798
DDA_dlfq_maxlfq_top0	9	DDA	Maxquant	ROTS	3	0.413005	0.667595	0.820406	0.972279	0.557781	0.490994	0.177438	0.223923	0.669314	0.722007	0.57032	0.64017	0.965744	1	0	0	0	0	1	0.0494688	0.0648072	0.933706
DDA_dlfq_maxlfq_top3	9	DDA	Maxquant	ROTS	3	0.24938	0.66856	0.803804	0.991679	0.555453	0.446541	0.184654	0.079934	0.669314	0.727796	0.566792	0.64017	0.947546	1	0	0	1	0	0	0.0496388	0.0631665	0.763099
DDA_dlfq_maxlfq_count	9	DDA	Maxquant	ROTS	3	0.677387	0.730598	0.640196	0.73573	0.54052	0.656158	0.999187	0.585639	0.692613	0.966398	0.466295	0.836441	0.641036	0	0	0	1	0	1	0.00314492	0.511895	0.781252
DDA_dlfq_top0_top3	9	DDA	Maxquant	ROTS	3	0.341281	0.157898	0.684962	0.382046	0.0462758	0.403494	0.161131	0.112161	0.15515	0.252813	0.0257665	0.00327119	0.641317	1	0	1	0	0	0	0.0494688	0.0648072	0.88699
DDA_dlfq_top0_count	9	DDA	Maxquant	ROTS	3	0.685523	0.480339	0.770885	0.529371	0.118779	0.868027	0.99112	0.688212	0.45274	0.73801	0.297168	0.368989	0.290814	0	0	1	0	0	1	0	0.542248	0.688213
DDA_dlfq_top3_count	9	DDA	Maxquant	ROTS	3	0.591187	0.482446	0.775241	0.548071	0.12336	0.847184	0.991828	0.650352	0.45274	0.753645	0.280832	0.368989	0.25054	0	0	1	1	0	0	0.000169992	0.540607	0.734369
DDA_maxlfq_top0_top3	9	DDA	Maxquant	ROTS	3	0.261459	0.51159	0.423934	0.710102	0.400292	0.376032	0.252633	0.230012	0.516812	0.59568	0.548707	0.638535	0.668302	1	1	0	0	0	0	0.423204	0	0.43265
DDA_maxlfq_top0_count	9	DDA	Maxquant	ROTS	3	0.787265	0.574878	0.32207	0.710864	0.352368	0.757493	1	0.696317	0.542229	0.905895	0.429859	0.836114	0.575961	0	1	0	0	0	1	0.373736	0.477441	0.0975967
DDA_maxlfq_top3_count	9	DDA	Maxquant	ROTS	3	0.805782	0.574306	0.296362	0.732048	0.355649	0.764173	0.999896	0.681888	0.542229	0.916637	0.447586	0.836114	0.474868	0	1	0	1	0	0	0.377306	0.529943	0.333912
DDA_top0_top3_count	9	DDA	Maxquant	ROTS	3	0.467578	0.323976	0.292908	0.270377	0.0446078	0.651522	0.995357	0.639975	0.299709	0.595825	0.276422	0.367027	0.380388	0	1	1	0	0	0	0.373736	0.477441	0.54007
DDA_dlfq_maxlfq_top0_top3	9	DDA	Maxquant	ROTS	4	0.316789	0.501411	0.683276	0.932604	0.38995	0.429265	0.217188	0.161507	0.502648	0.574574	0.427896	0.480536	0.952331	1	0	0	0	0	0	0.0494688	0.0648072	0.774043
DDA_dlfq_maxlfq_top0_count	9	DDA	Maxquant	ROTS	4	0.591599	0.613352	0.638389	0.949189	0.392362	0.693168	0.999032	0.548523	0.589224	0.833078	0.440911	0.670429	0.853796	0	0	0	0	0	1	0	0.542248	0.7656
DDA_dlfq_maxlfq_top3_count	9	DDA	Maxquant	ROTS	4	0.484745	0.613977	0.628901	0.967526	0.393745	0.678514	0.998785	0.499453	0.589224	0.841119	0.440376	0.670429	0.83483	0	0	0	1	0	0	0.000169992	0.540607	0.799624
DDA_dlfq_top0_top3_count	9	DDA	Maxquant	ROTS	4	0.521579	0.361165	0.630999	0.598267	0.0832557	0.692557	0.991078	0.522675	0.340085	0.585073	0.220047	0.277069	0.495813	0	0	1	0	0	0	0	0.542248	0.797176
DDA_maxlfq_top0_top3_count	9	DDA	Maxquant	ROTS	4	0.478995	0.496187	0.333818	0.751187	0.288229	0.637305	0.999769	0.562048	0.475245	0.753509	0.425643	0.669447	0.609327	0	1	0	0	0	0	0.373736	0.477441	0.542642
DDA_dlfq_maxlfq_top0_top3_count	9	DDA	Maxquant	ROTS	5	0.478907	0.517218	0.583077	1	0.309508	0.626162	0.998463	0.458841	0.499285	0.717471	0.390975	0.553582	0.915853	0	0	0	0	0	0	0	0.542248	0.919721
DDA_dlfq_maxlfq	10	DDA	Maxquant	limma	2	0.0868563	1	0.577357	0.725678	1	0.379733	0.134688	0.0861865	1	0.791763	0.539841	0.952285	0.876898	1	0	0	1	0	1	0.224583	0	0.289771
DDA_dlfq_top0	10	DDA	Maxquant	limma	2	0.68607	0.28261	0.434305	0.301941	0.139115	0.511788	0	0.5182	0.279289	0.458643	0.95277	0.00604836	0.619729	1	0	1	0	0	1	0.184442	0.178738	0.93334
DDA_dlfq_top3	10	DDA	Maxquant	limma	2	0.602364	0.292554	0.603571	0.340303	0.12285	0.473623	0.072087	0.401794	0.290272	0.417325	0.447536	0.0201613	0.367923	1	0	1	1	0	0	0.186672	0.168808	0.757414
DDA_dlfq_count	10	DDA	Maxquant	limma	2	1	0.715033	1	0.228605	0.58384	1	0.996332	0.852346	0.723326	1	0	0.506048	0.337709	0	0	1	1	0	1	0.00826446	0.963201	0.629437
DDA_maxlfq_top0	10	DDA	Maxquant	limma	2	0.560613	0.750018	0.365219	0.711709	0.710861	0.608996	0.152477	0.439583	0.741109	0.892463	0.476514	0.952285	0.71007	1	1	0	0	0	1	0.669815	0	0.31593
DDA_maxlfq_top3	10	DDA	Maxquant	limma	2	0.50483	0.742874	0	0.752721	0.64887	0.584111	0.154235	0.377333	0.730126	0.857034	0.207623	0.952285	0.736375	1	1	0	1	0	0	0.687262	0.021028	0.269814
DDA_maxlfq_count	10	DDA	Maxquant	limma	2	0.969706	0.613832	0.375343	0.199327	0.728884	0.91193	1	0.802543	0.481172	0.656048	0.187362	1	0.401762	0	1	0	1	0	1	1	0.390187	0.322467
DDA_top0_top3	10	DDA	Maxquant	limma	2	0	0	0.166675	0	0	0	0.0485474	0.236189	0	0.0820193	0.0235302	0	0.776608	1	1	1	0	0	0	0.669815	0	0.746622
DDA_top0_count	10	DDA	Maxquant	limma	2	0.848363	0.429255	0.660472	0.229173	0.282097	0.934438	0.998105	0.81928	0.449791	0.848706	0.706673	0.49664	0.833391	0	1	1	0	0	1	0.485373	0.821262	0.202439
DDA_top3_count	10	DDA	Maxquant	limma	2	0.936525	0.433748	0.643338	0.245174	0.447579	0.957225	0.99791	0.982178	0.448222	0.842014	0.271376	0.502688	0.661733	0	1	1	1	0	0	0.492457	0.888435	0.294878
DDA_dlfq_maxlfq_top0	10	DDA	Maxquant	limma	3	0.479048	0.677543	0.45896	0.877104	0.616659	0.500172	0.194037	0.34799	0.673466	0.71429	0.656375	0.636873	0.812217	1	0	0	0	0	1	0.184442	0.178738	0.824899
DDA_dlfq_maxlfq_top3	10	DDA	Maxquant	limma	3	0.399389	0.678476	0.393643	0.911776	0.590573	0.479156	0.206969	0.288438	0.673466	0.688708	0.398333	0.641577	0.924011	1	0	0	1	0	0	0.186672	0.168808	0.659807
DDA_dlfq_maxlfq_count	10	DDA	Maxquant	limma	3	0.700195	0.776288	0.6509	0.702404	0.770908	0.763888	0.999042	0.580359	0.734833	0.815937	0.242401	0.819444	0.866386	0	0	0	1	0	1	0.00826446	0.963201	0.398081
DDA_dlfq_top0_top3	10	DDA	Maxquant	limma	3	0.430398	0.191721	0.401517	0.339069	0.0873215	0.32847	0.159418	0.385394	0.189854	0.319329	0.474612	0.00873652	0.564588	1	0	1	0	0	0	0.184442	0.178738	0.842487
DDA_dlfq_top0_count	10	DDA	Maxquant	limma	3	0.788838	0.475633	0.698259	0.485892	0.335017	0.815408	0.996268	0.729942	0.484135	0.769116	0.553148	0.336246	0.61447	0	0	1	0	0	1	0	1	0.673248
DDA_dlfq_top3_count	10	DDA	Maxquant	limma	3	0.764668	0.480445	0.74897	0.519628	0.384756	0.810283	0.995769	0.745439	0.487273	0.753113	0.239637	0.342966	0.591707	0	0	1	1	0	0	0.000524731	0.997664	0.787542
DDA_maxlfq_top0_top3	10	DDA	Maxquant	limma	3	0.270977	0.497631	0.177298	0.660824	0.453244	0.397702	0.202607	0.351035	0.490411	0.610506	0.235889	0.634857	0.728349	1	1	0	0	0	0	0.669815	0	0.35193
DDA_maxlfq_top0_count	10	DDA	Maxquant	limma	3	0.792216	0.597702	0.467011	0.684802	0.573948	0.818454	0.999934	0.687136	0.557357	0.799073	0.45685	0.816308	0.668443	0	1	0	0	0	1	0.485373	0.821262	0.351538
DDA_maxlfq_top3_count	10	DDA	Maxquant	limma	3	0.805139	0.596818	0.33956	0.717512	0.608444	0.817755	0.999705	0.720685	0.553173	0.785032	0.22212	0.818324	0.674931	0	1	0	1	0	0	0.492195	0.889603	0.245887
DDA_top0_top3_count	10	DDA	Maxquant	limma	3	0.491966	0.287668	0.490162	0.271551	0.243225	0.630554	0.997764	0.679216	0.299338	0.590913	0.33386	0.333109	1	0	1	1	0	0	0	0.485373	0.821262	0.436491
DDA_dlfq_maxlfq_top0_top3	10	DDA	Maxquant	limma	4	0.395795	0.511343	0.357854	0.849318	0.436949	0.426375	0.247056	0.343214	0.506799	0.583208	0.441302	0.480511	0.843027	1	0	0	0	0	0	0.184442	0.178738	0.653074
DDA_dlfq_maxlfq_top0_count	10	DDA	Maxquant	limma	4	0.666503	0.631792	0.568783	0.943691	0.574133	0.724481	0.998723	0.586357	0.612448	0.774604	0.477193	0.652218	0.721389	0	0	0	0	0	1	0	1	0.588314
DDA_dlfq_maxlfq_top3_count	10	DDA	Maxquant	limma	4	0.629621	0.633007	0.533268	0.976659	0.58867	0.71777	0.99835	0.58373	0.612186	0.760698	0.275623	0.655578	0.859601	0	0	0	1	0	0	0.000524731	0.997664	0.608753
DDA_dlfq_top0_top3_count	10	DDA	Maxquant	limma	4	0.618526	0.358867	0.584727	0.550941	0.26258	0.646179	0.995076	0.634998	0.36515	0.608118	0.400314	0.255264	0.884964	0	0	1	0	0	0	0	1	0.701081
DDA_maxlfq_top0_top3_count	10	DDA	Maxquant	limma	4	0.530382	0.494955	0.368508	0.719546	0.469715	0.666117	0.999487	0.609518	0.47507	0.696381	0.31218	0.65065	0.698364	0	1	0	0	0	0	0.485373	0.821262	0.357948
DDA_dlfq_maxlfq_top0_top3_count	10	DDA	Maxquant	limma	5	0.568004	0.525992	0.482628	1	0.46641	0.636184	0.997896	0.551563	0.514331	0.684602	0.381323	0.538844	0.71255	0	0	0	0	0	0	0	1	0.587084
DDA_dlfq_maxlfq	10	DDA	Maxquant	ROTS	2	0.0868563	1	0.577357	0.725678	1	0.379733	0.134688	0	1	0.594298	0.487222	0.952285	0.242356	1	0	0	1	0	1	0.224583	0	0.253919
DDA_dlfq_top0	10	DDA	Maxquant	ROTS	2	0.68607	0.28261	0.434305	0.301941	0.139115	0.511788	0	0.45919	0.279289	0.347065	1	0.00604836	0.666221	1	0	1	0	0	1	0.184442	0.178738	0.944023
DDA_dlfq_top3	10	DDA	Maxquant	ROTS	2	0.602364	0.292554	0.603571	0.340303	0.12285	0.473623	0.072087	0.378691	0.290272	0.318649	0.559513	0.0201613	0.288585	1	0	1	1	0	0	0.186672	0.168808	1
DDA_dlfq_count	10	DDA	Maxquant	ROTS	2	1	0.715033	1	0.228605	0.58384	1	0.996332	0.82443	0.723326	0.915996	0.0971946	0.506048	0.893038	0	0	1	1	0	1	0.00826446	0.963201	0.730295
DDA_maxlfq_top0	10	DDA	Maxquant	ROTS	2	0.560613	0.750018	0.365219	0.711709	0.710861	0.608996	0.152477	0.370633	0.741109	0.717714	0.467379	0.952285	0.31176	1	1	0	0	0	1	0.669815	0	0.362953
DDA_maxlfq_top3	10	DDA	Maxquant	ROTS	2	0.50483	0.742874	0	0.752721	0.64887	0.584111	0.154235	0.345063	0.730126	0.717656	0.155275	0.952285	0.383546	1	1	0	1	0	0	0.687262	0.021028	0.0958274
DDA_maxlfq_count	10	DDA	Maxquant	ROTS	2	0.969706	0.613832	0.375343	0.199327	0.728884	0.91193	1	0.732578	0.481172	0.458687	0.0669139	1	0	0	1	0	1	0	1	1	0.390187	0.237287
DDA_top0_top3	10	DDA	Maxquant	ROTS	2	0	0	0.166675	0	0	0	0.0485474	0.236314	0	0	0.00373802	0	0.360479	1	1	1	0	0	0	0.669815	0	0.65401
DDA_top0_count	10	DDA	Maxquant	ROTS	2	0.848363	0.429255	0.660472	0.229173	0.282097	0.934438	0.998105	0.7986	0.449791	0.782962	0.618557	0.49664	0.0856071	0	1	1	0	0	1	0.485373	0.821262	0.496527
DDA_top3_count	10	DDA	Maxquant	ROTS	2	0.936525	0.433748	0.643338	0.245174	0.447579	0.957225	0.99791	1	0.448222	0.821624	0.246242	0.502688	0.0655027	0	1	1	1	0	0	0.492457	0.888435	0.309315
DDA_dlfq_maxlfq_top0	10	DDA	Maxquant	ROTS	3	0.479048	0.677543	0.45896	0.877104	0.616659	0.500172	0.194037	0.276608	0.673466	0.553026	0.651533	0.636873	0.549867	1	0	0	0	0	1	0.184442	0.178738	0.735052
DDA_dlfq_maxlfq_top3	10	DDA	Maxquant	ROTS	3	0.399389	0.678476	0.393643	0.911776	0.590573	0.479156	0.206969	0.241252	0.673466	0.543534	0.40067	0.641577	0.270787	1	0	0	1	0	0	0.186672	0.168808	0.672071
DDA_dlfq_maxlfq_count	10	DDA	Maxquant	ROTS	3	0.700195	0.776288	0.6509	0.702404	0.770908	0.763888	0.999042	0.519003	0.734833	0.656327	0.21711	0.819444	0.305679	0	0	0	1	0	1	0.00826446	0.963201	0.575349
DDA_dlfq_top0_top3	10	DDA	Maxquant	ROTS	3	0.430398	0.191721	0.401517	0.339069	0.0873215	0.32847	0.159418	0.358065	0.189854	0.221905	0.521084	0.00873652	0.574097	1	0	1	0	0	0	0.184442	0.178738	0.953264
DDA_dlfq_top0_count	10	DDA	Maxquant	ROTS	3	0.788838	0.475633	0.698259	0.485892	0.335017	0.815408	0.996268	0.694073	0.484135	0.682007	0.571917	0.336246	0.446115	0	0	1	0	0	1	0	1	0.850953
DDA_dlfq_top3_count	10	DDA	Maxquant	ROTS	3	0.764668	0.480445	0.74897	0.519628	0.384756	0.810283	0.995769	0.734374	0.487273	0.685423	0.300983	0.342966	0.335586	0	0	1	1	0	0	0.000524731	0.997664	0.745729
DDA_maxlfq_top0_top3	10	DDA	Maxquant	ROTS	3	0.270977	0.497631	0.177298	0.660824	0.453244	0.397702	0.202607	0.317337	0.490411	0.478456	0.208797	0.634857	0.308685	1	1	0	0	0	0	0.669815	0	0.336341
DDA_maxlfq_top0_count	10	DDA	Maxquant	ROTS	3	0.792216	0.597702	0.467011	0.684802	0.573948	0.818454	0.999934	0.633937	0.557357	0.653121	0.384283	0.816308	0.297553	0	1	0	0	0	1	0.485373	0.821262	0.227144
DDA_maxlfq_top3_count	10	DDA	Maxquant	ROTS	3	0.805139	0.596818	0.33956	0.717512	0.608444	0.817755	0.999705	0.692547	0.553173	0.665989	0.156144	0.818324	0.266017	0	1	0	1	0	0	0.492195	0.889603	0.321906
DDA_top0_top3_count	10	DDA	Maxquant	ROTS	3	0.491966	0.287668	0.490162	0.271551	0.243225	0.630554	0.997764	0.678304	0.299338	0.534862	0.289513	0.333109	0.199823	0	1	1	0	0	0	0.485373	0.821262	0.802782
DDA_dlfq_maxlfq_top0_top3	10	DDA	Maxquant	ROTS	4	0.395795	0.511343	0.357854	0.849318	0.436949	0.426375	0.247056	0.298315	0.506799	0.44923	0.445521	0.480511	0.500631	1	0	0	0	0	0	0.184442	0.178738	0.753223
DDA_dlfq_maxlfq_top0_count	10	DDA	Maxquant	ROTS	4	0.666503	0.631792	0.568783	0.943691	0.574133	0.724481	0.998723	0.530905	0.612448	0.63612	0.456211	0.652218	0.433621	0	0	0	0	0	1	0	1	0.873427
DDA_dlfq_maxlfq_top3_count	10	DDA	Maxquant	ROTS	4	0.629621	0.633007	0.533268	0.976659	0.58867	0.71777	0.99835	0.546794	0.612186	0.637818	0.268727	0.655578	0.302494	0	0	0	1	0	0	0.000524731	0.997664	0.873427
DDA_dlfq_top0_top3_count	10	DDA	Maxquant	ROTS	4	0.618526	0.358867	0.584727	0.550941	0.26258	0.646179	0.995076	0.616204	0.36515	0.531049	0.420874	0.255264	0.399442	0	0	1	0	0	0	0	1	0.843993
DDA_maxlfq_top0_top3_count	10	DDA	Maxquant	ROTS	4	0.530382	0.494955	0.368508	0.719546	0.469715	0.666117	0.999487	0.580531	0.47507	0.583107	0.259684	0.65065	0.350307	0	1	0	0	0	0	0.485373	0.821262	0
DDA_dlfq_maxlfq_top0_top3_count	10	DDA	Maxquant	ROTS	5	0.568004	0.525992	0.482628	1	0.46641	0.636184	0.997896	0.51455	0.514331	0.567465	0.370203	0.538844	0.504435	0	0	0	0	0	0	0	1	0.710673
DDA_dlfq_maxlfq	11	DDA	Maxquant	limma	2	0.226098	0.884303	0.659333	0.798799	0.514803	0.482864	0.133459	0.213665	0.631927	0.891578	0.00021085	1	0.145462	1	0	0	1	0	1	0.730072	0.791331	0.539493
DDA_dlfq_top0	11	DDA	Maxquant	limma	2	0.604102	0.999679	0.695328	0.650455	0.0600619	0.610283	0	0.681125	0.999492	0.874768	0.661642	0.815083	0.398565	1	0	1	0	0	1	0	0.788979	0.728879
DDA_dlfq_top3	11	DDA	Maxquant	limma	2	0.524871	1	0.732068	0.666586	0.179795	0.615322	0.0418771	0.676816	1	0.889545	0.598816	0.815599	1	1	0	1	1	0	0	0.00171929	0.793683	0.729286
DDA_dlfq_count	11	DDA	Maxquant	limma	2	1	0.389222	1	0.312826	0.666369	0.985917	0.996301	0.981772	0.323843	0.996748	0.231381	0.868802	0.380973	0	0	1	1	0	1	0.89231	0.44254	0.486656
DDA_maxlfq_top0	11	DDA	Maxquant	limma	2	0.561073	0.880881	0.552838	0.504209	0.683314	0.601967	0.0856804	0.608165	0.731063	0.775999	0.663368	0.742769	0	1	1	0	0	0	1	0.36699	0	0.642601
DDA_maxlfq_top3	11	DDA	Maxquant	limma	2	0.469351	0.881202	0	0.518671	0.648562	0.606467	0.12011	0.656524	0.731571	0.801784	0.568546	0.743285	0.167578	1	1	0	1	0	0	0.368709	0.0047043	0.612863
DDA_maxlfq_count	11	DDA	Maxquant	limma	2	0.950504	0.625214	0.390699	0.193527	0.9767	0.909302	0.999283	0.875557	0.378749	1	0.346203	0.960744	0.601225	0	1	0	1	0	1	1	0.55746	0.460485
DDA_top0_top3	11	DDA	Maxquant	limma	2	0	0	0.32344	0	0	0	0.0370703	0.0661864	0	0.0115198	0.0366247	0	0.261741	1	1	1	0	0	0	0.36699	0	0.735662
DDA_top0_count	11	DDA	Maxquant	limma	2	0.905015	0.607784	0.879224	0.154408	0.685373	0.973381	0.98658	0.923894	0.780885	0.940579	0.893439	0.793388	0.122557	0	1	1	0	0	1	0.36699	0	0.747933
DDA_top3_count	11	DDA	Maxquant	limma	2	0.956243	0.608105	0.847905	0.159399	1	1	0.989914	1	0.781393	0.97907	1	0.793905	0.354726	0	1	1	1	0	0	0.368709	0.0047043	0.68155
DDA_dlfq_maxlfq_top0	11	DDA	Maxquant	limma	3	0.464881	0.921621	0.635833	0.988417	0.419393	0.565038	0.163367	0.500985	0.787494	0.847448	0.44174	0.852617	0.334228	1	0	0	0	0	1	0	0.788979	0.710107
DDA_dlfq_maxlfq_top3	11	DDA	Maxquant	limma	3	0.40811	0.921835	0.4638	1	0.44772	0.568218	0.191503	0.515669	0.787833	0.860969	0.389191	0.852961	0.59872	1	0	0	1	0	0	0.00140668	0.794355	0.800068
DDA_dlfq_maxlfq_count	11	DDA	Maxquant	limma	3	0.739256	0.632913	0.683344	0.762002	0.719291	0.792694	1	0.690331	0.44484	0.962775	0.192598	0.943182	0.308855	0	0	0	1	0	1	0.63301	1	0.413924
DDA_dlfq_top0_top3	11	DDA	Maxquant	limma	3	0.245168	0.66656	0.583612	0.687482	0.0799521	0.408535	0.153879	0.474709	0.666497	0.591944	0.432361	0.543561	0.990422	1	0	1	0	0	0	0	0.788979	0.994317
DDA_dlfq_top0_count	11	DDA	Maxquant	limma	3	0.818544	0.665562	0.858184	0.663335	0.470601	0.856527	0.993985	0.862264	0.701407	0.937365	0.595487	0.825758	0.329492	0	0	1	0	0	1	0	0.788979	0.655426
DDA_dlfq_top3_count	11	DDA	Maxquant	limma	3	0.810073	0.665776	0.859991	0.673951	0.615388	0.86708	0.994567	0.886196	0.701745	0.955121	0.610066	0.826102	0.894633	0	0	1	1	0	0	0.00171929	0.793683	0.702769
DDA_maxlfq_top0_top3	11	DDA	Maxquant	limma	3	0.235459	0.587361	0.292093	0.48988	0.443959	0.402812	0.215959	0.443625	0.487544	0.529768	0.422846	0.495351	0.243532	1	1	0	0	0	0	0.36699	0	0.723475
DDA_maxlfq_top0_count	11	DDA	Maxquant	limma	3	0.755629	0.704626	0.607587	0.486288	0.781796	0.828217	0.99798	0.802538	0.630232	0.905526	0.634337	0.8323	0.614503	0	1	0	0	0	1	0.36699	0	0.613492
DDA_maxlfq_top3_count	11	DDA	Maxquant	limma	3	0.742711	0.70484	0.412868	0.494629	0.875087	0.83859	0.997842	0.844027	0.630571	0.926951	0.63825	0.832645	0.697213	0	1	0	1	0	0	0.368396	0.00537634	0.547953
DDA_top0_top3_count	11	DDA	Maxquant	limma	3	0.397592	0.405297	0.683523	0.163184	0.561791	0.657794	0.985774	0.66336	0.520759	0.643723	0.643355	0.529098	0.230971	0	1	1	0	0	0	0.36699	0	0.577598
DDA_dlfq_maxlfq_top0_top3	11	DDA	Maxquant	limma	4	0.282291	0.774344	0.493834	0.941657	0.347756	0.486151	0.271671	0.483747	0.682342	0.707532	0.421535	0.686123	0.85145	1	0	0	0	0	0	0	0.788979	0.746857
DDA_dlfq_maxlfq_top0_count	11	DDA	Maxquant	limma	4	0.663101	0.73118	0.696237	0.924577	0.59777	0.760619	0.9987	0.71403	0.640993	0.913279	0.466041	0.863464	0.345439	0	0	0	0	0	1	0	0.788979	0.715091
DDA_dlfq_maxlfq_top3_count	11	DDA	Maxquant	limma	4	0.642263	0.731341	0.605001	0.932955	0.664372	0.766645	0.998551	0.734056	0.641247	0.926454	0.457526	0.863722	0.519007	0	0	0	1	0	0	0.00140668	0.794355	0.54151
DDA_dlfq_top0_top3_count	11	DDA	Maxquant	limma	4	0.437019	0.600798	0.746328	0.694849	0.431933	0.697484	0.990167	0.721632	0.647602	0.782038	0.570317	0.681129	0.906398	0	0	1	0	0	0	0	0.788979	0.67111
DDA_maxlfq_top0_top3_count	11	DDA	Maxquant	limma	4	0.430073	0.600531	0.499018	0.506774	0.665658	0.681853	0.995204	0.688388	0.567277	0.751492	0.584697	0.672348	0.674493	0	1	0	0	0	0	0.36699	0	0.330113
DDA_dlfq_maxlfq_top0_top3_count	11	DDA	Maxquant	limma	5	0.428262	0.687639	0.608083	0.9059	0.541498	0.67855	0.996119	0.66837	0.635892	0.816159	0.500023	0.753357	0.654705	0	0	0	0	0	0	0	0.788979	0.845406
DDA_dlfq_maxlfq	11	DDA	Maxquant	ROTS	2	0.226098	0.884303	0.659333	0.798799	0.514803	0.482864	0.133459	0	0.631927	0.831947	0	1	0.437832	1	0	0	1	0	1	0.730072	0.791331	0.255726
DDA_dlfq_top0	11	DDA	Maxquant	ROTS	2	0.604102	0.999679	0.695328	0.650455	0.0600619	0.610283	0	0.580805	0.999492	0.831922	0.632557	0.815083	0.606881	1	0	1	0	0	1	0	0.788979	0.703996
DDA_dlfq_top3	11	DDA	Maxquant	ROTS	2	0.524871	1	0.732068	0.666586	0.179795	0.615322	0.0418771	0.612861	1	0.854734	0.624156	0.815599	0.68227	1	0	1	1	0	0	0.00171929	0.793683	0.681321
DDA_dlfq_count	11	DDA	Maxquant	ROTS	2	1	0.389222	1	0.312826	0.666369	0.985917	0.996301	0.892395	0.323843	0.954425	0.081086	0.868802	0.251346	0	0	1	1	0	1	0.89231	0.44254	0
DDA_maxlfq_top0	11	DDA	Maxquant	ROTS	2	0.561073	0.880881	0.552838	0.504209	0.683314	0.601967	0.0856804	0.499187	0.731063	0.748571	0.603622	0.742769	0.240362	1	1	0	0	0	1	0.36699	0	0.578443
DDA_maxlfq_top3	11	DDA	Maxquant	ROTS	2	0.469351	0.881202	0	0.518671	0.648562	0.606467	0.12011	0.581172	0.731571	0.780099	0.564307	0.743285	0.328568	1	1	0	1	0	0	0.368709	0.0047043	0.687523
DDA_maxlfq_count	11	DDA	Maxquant	ROTS	2	0.950504	0.625214	0.390699	0.193527	0.9767	0.909302	0.999283	0.764739	0.378749	0.954555	0.154537	0.960744	0.632312	0	1	0	1	0	1	1	0.55746	0.510093
DDA_top0_top3	11	DDA	Maxquant	ROTS	2	0	0	0.32344	0	0	0	0.0370703	0.0316296	0	0	0.0335405	0	0.63444	1	1	1	0	0	0	0.36699	0	0.914279
DDA_top0_count	11	DDA	Maxquant	ROTS	2	0.905015	0.607784	0.879224	0.154408	0.685373	0.973381	0.98658	0.914313	0.780885	0.935476	0.883732	0.793388	0.803238	0	1	1	0	0	1	0.36699	0	0.699935
DDA_top3_count	11	DDA	Maxquant	ROTS	2	0.956243	0.608105	0.847905	0.159399	1	1	0.989914	0.986971	0.781393	0.976295	0.970023	0.793905	0.297096	0	1	1	1	0	0	0.368709	0.0047043	0.750942
DDA_dlfq_maxlfq_top0	11	DDA	Maxquant	ROTS	3	0.464881	0.921621	0.635833	0.988417	0.419393	0.565038	0.163367	0.359997	0.787494	0.804146	0.41206	0.852617	0.258021	1	0	0	0	0	1	0	0.788979	0.746172
DDA_dlfq_maxlfq_top3	11	DDA	Maxquant	ROTS	3	0.40811	0.921835	0.4638	1	0.44772	0.568218	0.191503	0.398011	0.787833	0.82226	0.396155	0.852961	0.300773	1	0	0	1	0	0	0.00140668	0.794355	0.740075
DDA_dlfq_maxlfq_count	11	DDA	Maxquant	ROTS	3	0.739256	0.632913	0.683344	0.762002	0.719291	0.792694	1	0.552378	0.44484	0.913642	0.0785411	0.943182	0.592253	0	0	0	1	0	1	0.63301	1	0.455243
DDA_dlfq_top0_top3	11	DDA	Maxquant	ROTS	3	0.245168	0.66656	0.583612	0.687482	0.0799521	0.408535	0.153879	0.408432	0.666497	0.562219	0.430085	0.543561	0.987395	1	0	1	0	0	0	0	0.788979	0.800626
DDA_dlfq_top0_count	11	DDA	Maxquant	ROTS	3	0.818544	0.665562	0.858184	0.663335	0.470601	0.856527	0.993985	0.795838	0.701407	0.907274	0.532458	0.825758	0.44772	0	0	1	0	0	1	0	0.788979	0.680152
DDA_dlfq_top3_count	11	DDA	Maxquant	ROTS	3	0.810073	0.665776	0.859991	0.673951	0.615388	0.86708	0.994567	0.830742	0.701745	0.928485	0.558422	0.826102	0.745941	0	0	1	1	0	0	0.00171929	0.793683	0.618688
DDA_maxlfq_top0_top3	11	DDA	Maxquant	ROTS	3	0.235459	0.587361	0.292093	0.48988	0.443959	0.402812	0.215959	0.370663	0.487544	0.509556	0.40049	0.495351	0.430916	1	1	0	0	0	0	0.36699	0	0.645273
DDA_maxlfq_top0_count	11	DDA	Maxquant	ROTS	3	0.755629	0.704626	0.607587	0.486288	0.781796	0.828217	0.99798	0.72608	0.630232	0.879534	0.547297	0.8323	0.209038	0	1	0	0	0	1	0.36699	0	0.549126
DDA_maxlfq_top3_count	11	DDA	Maxquant	ROTS	3	0.742711	0.70484	0.412868	0.494629	0.875087	0.83859	0.997842	0.777627	0.630571	0.90365	0.562956	0.832645	0.475806	0	1	0	1	0	0	0.368396	0.00537634	0.667464
DDA_top0_top3_count	11	DDA	Maxquant	ROTS	3	0.397592	0.405297	0.683523	0.163184	0.561791	0.657794	0.985774	0.644305	0.520759	0.637257	0.629098	0.529098	0.563571	0	1	1	0	0	0	0.36699	0	1
DDA_dlfq_maxlfq_top0_top3	11	DDA	Maxquant	ROTS	4	0.282291	0.774344	0.493834	0.941657	0.347756	0.486151	0.271671	0.384276	0.682342	0.674545	0.409697	0.686123	0.315487	1	0	0	0	0	0	0	0.788979	0.862843
DDA_dlfq_maxlfq_top0_count	11	DDA	Maxquant	ROTS	4	0.663101	0.73118	0.696237	0.924577	0.59777	0.760619	0.9987	0.608573	0.640993	0.876149	0.392589	0.863464	0.242993	0	0	0	0	0	1	0	0.788979	0.606972
DDA_dlfq_maxlfq_top3_count	11	DDA	Maxquant	ROTS	4	0.642263	0.731341	0.605001	0.932955	0.664372	0.766645	0.998551	0.63969	0.641247	0.892009	0.399018	0.863722	0.353016	0	0	0	1	0	0	0.00140668	0.794355	0.718975
DDA_dlfq_top0_top3_count	11	DDA	Maxquant	ROTS	4	0.437019	0.600798	0.746328	0.694849	0.431933	0.697484	0.990167	0.669829	0.647602	0.758809	0.537516	0.681129	0.993717	0	0	1	0	0	0	0	0.788979	0.743515
DDA_maxlfq_top0_top3_count	11	DDA	Maxquant	ROTS	4	0.430073	0.600531	0.499018	0.506774	0.665658	0.681853	0.995204	0.629669	0.567277	0.732499	0.53496	0.672348	0.440975	0	1	0	0	0	0	0.36699	0	0.677683
DDA_dlfq_maxlfq_top0_top3_count	11	DDA	Maxquant	ROTS	5	0.428262	0.687639	0.608083	0.9059	0.541498	0.67855	0.996119	0.586407	0.635892	0.786802	0.454756	0.753357	0.32275	0	0	0	0	0	0	0	0.788979	0.896105
DIA_dlfq_maxlfq	0	DIA	Spectronaut	limma	2	0	0	0.662548	0	1	0	0.388869	0.0683549	0	0.164078	0	0	0.277067	0	0	0	0	1	1	0	0	0.872339
DIA_dlfq_top3	0	DIA	Spectronaut	limma	2	0.736081	0.15168	0.195275	0.179076	0.23975	0.807479	0	0.724509	0.112245	0.597896	0.252006	0.112245	0.865508	0	0	1	0	1	0	0	0	0.836614
DIA_dlfq_top1	0	DIA	Spectronaut	limma	2	1	1	0.998053	0.704536	0.127601	1	0.0330562	1	1	0.990612	0.361319	1	0.383404	0	0	1	0	0	1	0	0	0.895935
DIA_maxlfq_top3	0	DIA	Spectronaut	limma	2	0.635015	0.148506	0.578433	0.109737	0.540396	0.713727	0.510207	0.665908	0.112245	0.59914	0.0771978	0.112245	0.304039	0	1	0	0	1	0	0.0204918	0	0.862167
DIA_maxlfq_top1	0	DIA	Spectronaut	limma	2	0.921231	0.996827	1	0.566025	0.691736	0.961986	0.526442	0.993653	1	1	0.821133	1	0.281886	0	1	0	0	0	1	0.0204918	0	0.896995
DIA_top3_top1	0	DIA	Spectronaut	limma	2	0.508517	0.845145	0	0.633838	0	0.630442	0.148776	0.666336	0.887755	0.690408	0.214526	1	0.407009	0	1	1	0	0	0	1	0	0
DIA_dlfq_maxlfq_top3	0	DIA	Spectronaut	limma	3	0.453656	0.100061	0.478752	0.241007	0.593382	0.507069	0.734846	0.486257	0.0748299	0.453705	0.109735	0.0748295	0.760987	0	0	0	0	1	0	0	0	0.954542
DIA_dlfq_maxlfq_top1	0	DIA	Spectronaut	limma	3	0.608021	0.665608	0.886867	0.831817	0.606446	0.653995	0.751846	0.687336	0.666667	0.71823	0.394151	0.666666	0.525134	0	0	0	0	0	1	0	0	0.943761
DIA_dlfq_top3_top1	0	DIA	Spectronaut	limma	3	0.753986	0.665608	0.397776	0.915349	0.122451	0.81264	0.474958	0.796948	0.666667	0.759639	0.275951	0.704081	0.879352	0	0	1	0	0	0	0	0	0.975017
DIA_maxlfq_top3_top1	0	DIA	Spectronaut	limma	3	0.693924	0.663493	0.526144	0.826151	0.41071	0.768718	0.857741	0.775299	0.666667	0.763183	0.370952	0.704081	0.51026	0	1	0	0	0	0	0.0204918	0	0.893666
DIA_dlfq_maxlfq_top3_top1	0	DIA	Spectronaut	limma	4	0.62472	0.523692	0.572385	1	0.433247	0.685606	1	0.68646	0.518707	0.673689	0.287697	0.537415	0.931898	0	0	0	0	0	0	0	0	1
DIA_dlfq_maxlfq	0	DIA	Spectronaut	ROTS	2	0	0	0.662548	0	1	0	0.388869	0	0	0	0.374466	0	0.399937	0	0	0	0	1	1	0	0	0.886781
DIA_dlfq_top3	0	DIA	Spectronaut	ROTS	2	0.736081	0.15168	0.195275	0.179076	0.23975	0.807479	0	0.603247	0.112245	0.463187	0.342438	0.112245	0.421975	0	0	1	0	1	0	0	0	0.892952
DIA_dlfq_top1	0	DIA	Spectronaut	ROTS	2	1	1	0.998053	0.704536	0.127601	1	0.0330562	0.867659	1	0.864708	0.213843	1	0.844787	0	0	1	0	0	1	0	0	0.896837
DIA_maxlfq_top3	0	DIA	Spectronaut	ROTS	2	0.635015	0.148506	0.578433	0.109737	0.540396	0.713727	0.510207	0.593838	0.112245	0.516829	0.177236	0.112245	0.547634	0	1	0	0	1	0	0.0204918	0	0.818227
DIA_maxlfq_top1	0	DIA	Spectronaut	ROTS	2	0.921231	0.996827	1	0.566025	0.691736	0.961986	0.526442	0.91696	1	0.922679	1	1	0	0	1	0	0	0	1	0.0204918	0	0.894969
DIA_top3_top1	0	DIA	Spectronaut	ROTS	2	0.508517	0.845145	0	0.633838	0	0.630442	0.148776	0.548366	0.887755	0.578586	0.158749	1	0.641163	0	1	1	0	0	0	1	0	0.236386
DIA_dlfq_maxlfq_top3	0	DIA	Spectronaut	ROTS	3	0.453656	0.100061	0.478752	0.241007	0.593382	0.507069	0.734846	0.399028	0.0748299	0.326672	0.298047	0.0748295	0.575307	0	0	0	0	1	0	0	0	0.913924
DIA_dlfq_maxlfq_top1	0	DIA	Spectronaut	ROTS	3	0.608021	0.665608	0.886867	0.831817	0.606446	0.653995	0.751846	0.594873	0.666667	0.595796	0.529436	0.666666	0.689199	0	0	0	0	0	1	0	0	0.929248
DIA_dlfq_top3_top1	0	DIA	Spectronaut	ROTS	3	0.753986	0.665608	0.397776	0.915349	0.122451	0.81264	0.474958	0.67309	0.666667	0.635494	0.238343	0.704081	1	0	0	1	0	0	0	0	0	0.955639
DIA_maxlfq_top3_top1	0	DIA	Spectronaut	ROTS	3	0.693924	0.663493	0.526144	0.826151	0.41071	0.768718	0.857741	0.686388	0.666667	0.672698	0.445328	0.704081	0.580968	0	1	0	0	0	0	0.0204918	0	0.938186
DIA_dlfq_maxlfq_top3_top1	0	DIA	Spectronaut	ROTS	4	0.62472	0.523692	0.572385	1	0.433247	0.685606	1	0.588345	0.518707	0.557665	0.377789	0.537415	0.794137	0	0	0	0	0	0	0	0	0.906765
DIA_dlfq_maxlfq	1	DIA	Spectronaut	limma	2	0.811507	0	0	0	1	0.579154	0.351796	0.818939	0	0	0.692405	0	0.652202	0	0	0	0	1	1	0	1	0.61636
DIA_dlfq_top3	1	DIA	Spectronaut	limma	2	0.892445	0.333837	0.686091	0.408673	0.289889	0.816074	0.00153569	0.593138	0.449636	0.64449	0	0.449636	0.0965901	0	0	1	0	1	0	0.000131038	0.499957	0.487481
DIA_dlfq_top1	1	DIA	Spectronaut	limma	2	1	1	1	0.765105	0.193435	1	0	0.924799	1	0.99818	0.178267	1	0.788056	0	0	1	0	0	1	0.000131038	0.499957	0.0763514
DIA_maxlfq_top3	1	DIA	Spectronaut	limma	2	0.58306	0.328818	0.514381	0.0226944	0.730851	0.702849	0.474103	0.551644	0.445349	0.559155	0.355319	0.449636	0.171237	0	1	0	0	1	0	0.0148061	0	0.874522
DIA_maxlfq_top1	1	DIA	Spectronaut	limma	2	0.780501	0.994982	0.874191	0.222132	0.749839	0.929547	0.359694	0.880399	0.995714	0.954264	1	1	0.720852	0	1	0	0	0	1	0.0148061	0	0.920566
DIA_top3_top1	1	DIA	Spectronaut	limma	2	0	0.661056	0.693014	0.476372	0	0	0.0697133	0	0.546078	0.766298	0.00603678	1	0.0484954	0	1	1	0	0	0	1	0	0.125797
DIA_dlfq_maxlfq_top3	1	DIA	Spectronaut	limma	3	0.693117	0.220885	0.400157	0.470678	0.67358	0.699359	0.792502	0.654573	0.298328	0.401215	0.349241	0.299757	0.229073	0	0	0	0	1	0	0	1	0.68669
DIA_dlfq_maxlfq_top1	1	DIA	Spectronaut	limma	3	0.704556	0.664994	0.624731	0.811675	0.647758	0.836234	0.6698	0.874712	0.665238	0.650814	0.623557	0.666667	0.956849	0	0	0	0	0	1	0	1	0.572182
DIA_dlfq_top3_top1	1	DIA	Spectronaut	limma	3	0.692263	0.664964	0.793035	1	0.161108	0.605358	0.392898	0.505979	0.665238	0.802989	0.0614345	0.816545	0.374509	0	0	1	0	0	0	0.000131038	0.499957	0
DIA_maxlfq_top3_top1	1	DIA	Spectronaut	limma	3	0.500722	0.661619	0.693863	0.630321	0.493563	0.544132	0.753388	0.477348	0.66238	0.759905	0.453785	0.816545	0.272015	0	1	0	0	0	0	0.0148061	0	0.722144
DIA_dlfq_maxlfq_top3_top1	1	DIA	Spectronaut	limma	4	0.605042	0.553115	0.627946	0.968057	0.494002	0.671271	1	0.628153	0.572796	0.653731	0.372005	0.649879	0.687968	0	0	0	0	0	0	0	1	0.302114
DIA_dlfq_maxlfq	1	DIA	Spectronaut	ROTS	2	0.811507	0	0	0	1	0.579154	0.351796	0.739334	0	0.00865417	0.686797	0	0.799447	0	0	0	0	1	1	0	1	0.408622
DIA_dlfq_top3	1	DIA	Spectronaut	ROTS	2	0.892445	0.333837	0.686091	0.408673	0.289889	0.816074	0.00153569	0.678546	0.449636	0.647647	0.000620242	0.449636	0.0939452	0	0	1	0	1	0	0.000131038	0.499957	0.422609
DIA_dlfq_top1	1	DIA	Spectronaut	ROTS	2	1	1	1	0.765105	0.193435	1	0	1	1	1	0.178823	1	0.841388	0	0	1	0	0	1	0.000131038	0.499957	0.359276
DIA_maxlfq_top3	1	DIA	Spectronaut	ROTS	2	0.58306	0.328818	0.514381	0.0226944	0.730851	0.702849	0.474103	0.644071	0.445349	0.563706	0.355243	0.449636	0	0	1	0	0	1	0	0.0148061	0	1
DIA_maxlfq_top1	1	DIA	Spectronaut	ROTS	2	0.780501	0.994982	0.874191	0.222132	0.749839	0.929547	0.359694	0.937441	0.995714	0.957485	0.989172	1	0.830328	0	1	0	0	0	1	0.0148061	0	0.848366
DIA_top3_top1	1	DIA	Spectronaut	ROTS	2	0	0.661056	0.693014	0.476372	0	0	0.0697133	0.0842936	0.546078	0.768823	0.000591512	1	0.131827	0	1	1	0	0	0	1	0	0.32898
DIA_dlfq_maxlfq_top3	1	DIA	Spectronaut	ROTS	3	0.693117	0.220885	0.400157	0.470678	0.67358	0.699359	0.792502	0.687317	0.298328	0.406669	0.347553	0.299757	0.616055	0	0	0	0	1	0	0	1	0.734305
DIA_dlfq_maxlfq_top1	1	DIA	Spectronaut	ROTS	3	0.704556	0.664994	0.624731	0.811675	0.647758	0.836234	0.6698	0.892258	0.665238	0.65538	0.618264	0.666667	1	0	0	0	0	0	1	0	1	0.330342
DIA_dlfq_top3_top1	1	DIA	Spectronaut	ROTS	3	0.692263	0.664964	0.793035	1	0.161108	0.605358	0.392898	0.587613	0.665238	0.80549	0.0600115	0.816545	0.762842	0	0	1	0	0	0	0.000131038	0.499957	0.885867
DIA_maxlfq_top3_top1	1	DIA	Spectronaut	ROTS	3	0.500722	0.661619	0.693863	0.630321	0.493563	0.544132	0.753388	0.555268	0.66238	0.763338	0.448335	0.816545	0.673869	0	1	0	0	0	0	0.0148061	0	0.995013
DIA_dlfq_maxlfq_top3_top1	1	DIA	Spectronaut	ROTS	4	0.605042	0.553115	0.627946	0.968057	0.494002	0.671271	1	0.680614	0.572796	0.657719	0.368541	0.649879	0.966314	0	0	0	0	0	0	0	1	0.624011
DIA_dlfq_maxlfq	2	DIA	Spectronaut	limma	2	0.174437	0	0.984642	0	1	0.410299	0.551098	0.199748	0	0.447932	0.165006	0	0.514914	0	0	0	0	1	1	0	0	0.466641
DIA_dlfq_top3	2	DIA	Spectronaut	limma	2	0.927686	0.185629	0.373574	0.190266	0.217687	0.945325	0	0.731029	0.240964	0.887866	0.642063	0.240964	0.731244	0	0	1	0	1	0	0	0	0.709296
DIA_dlfq_top1	2	DIA	Spectronaut	limma	2	1	1	1	0.818692	0.147906	1	0.0433169	1	1	1	0.499334	1	0.134778	0	0	1	0	0	1	0	0	0.659981
DIA_maxlfq_top3	2	DIA	Spectronaut	limma	2	0.400026	0.167665	0.674058	0.0892972	0.577374	0.483353	0.512439	0.271528	0.228916	0.658402	0.155434	0.240964	0.45082	0	1	0	0	1	0	0.0882353	0	0.654938
DIA_maxlfq_top1	2	DIA	Spectronaut	limma	2	0.575254	0.982036	0.960658	0.569994	0.72222	0.708361	0.528618	0.68588	0.987952	0.864031	0.10207	1	0	0	1	0	0	0	1	0.0882353	0	0.681237
DIA_top3_top1	2	DIA	Spectronaut	limma	2	0	0.796407	0	0.758504	0	0	0.193597	0.046683	0.746988	0.0429227	0	1	0.0677269	0	1	1	0	0	0	1	0	0
DIA_dlfq_maxlfq_top3	2	DIA	Spectronaut	limma	3	0.494201	0.117764	0.677425	0.309385	0.598354	0.612992	0.822731	0.400768	0.156626	0.664733	0.320834	0.160643	0.567367	0	0	0	0	1	0	0	0	1
DIA_dlfq_maxlfq_top1	2	DIA	Spectronaut	limma	3	0.56147	0.660679	0.981767	0.94679	0.623375	0.70622	0.84088	0.628543	0.662651	0.770654	0.25547	0.666667	0.488807	0	0	0	0	0	1	0	0	0.617245
DIA_dlfq_top3_top1	2	DIA	Spectronaut	limma	3	0.65061	0.660679	0.457858	0.96901	0.121865	0.648442	0.45078	0.592571	0.662651	0.643596	0.380465	0.746988	0.644116	0	0	1	0	0	0	0	0	0.778812
DIA_maxlfq_top3_top1	2	DIA	Spectronaut	limma	3	0.332503	0.648703	0.544906	0.864283	0.433198	0.397238	0.809884	0.334697	0.654618	0.521785	0.0858346	0.746988	0.381687	0	1	0	0	0	0	0.0882353	0	0.425202
DIA_dlfq_maxlfq_top3_top1	2	DIA	Spectronaut	limma	4	0.505645	0.521956	0.665489	1	0.444198	0.591223	1	0.489145	0.534137	0.650192	0.260651	0.580321	0.539804	0	0	0	0	0	0	0	0	0.859419
DIA_dlfq_maxlfq	2	DIA	Spectronaut	ROTS	2	0.174437	0	0.984642	0	1	0.410299	0.551098	0	0	0.351444	0.242605	0	0.941289	0	0	0	0	1	1	0	0	0.563846
DIA_dlfq_top3	2	DIA	Spectronaut	ROTS	2	0.927686	0.185629	0.373574	0.190266	0.217687	0.945325	0	0.680444	0.240964	0.847712	0.691269	0.240964	0.743624	0	0	1	0	1	0	0	0	0.928838
DIA_dlfq_top1	2	DIA	Spectronaut	ROTS	2	1	1	1	0.818692	0.147906	1	0.0433169	0.966045	1	0.976103	1	1	0.167945	0	0	1	0	0	1	0	0	0.900634
DIA_maxlfq_top3	2	DIA	Spectronaut	ROTS	2	0.400026	0.167665	0.674058	0.0892972	0.577374	0.483353	0.512439	0.220774	0.228916	0.61451	0.128664	0.240964	0.465469	0	1	0	0	1	0	0.0882353	0	0.681397
DIA_maxlfq_top1	2	DIA	Spectronaut	ROTS	2	0.575254	0.982036	0.960658	0.569994	0.72222	0.708361	0.528618	0.725319	0.987952	0.867794	0.272341	1	0.0164765	0	1	0	0	0	1	0.0882353	0	0.707667
DIA_top3_top1	2	DIA	Spectronaut	ROTS	2	0	0.796407	0	0.758504	0	0	0.193597	0.0451135	0.746988	0	0.060077	1	0.092024	0	1	1	0	0	0	1	0	0.669051
DIA_dlfq_maxlfq_top3	2	DIA	Spectronaut	ROTS	3	0.494201	0.117764	0.677425	0.309385	0.598354	0.612992	0.822731	0.300406	0.156626	0.604555	0.354179	0.160643	0.991038	0	0	0	0	1	0	0	0	0.896221
DIA_dlfq_maxlfq_top1	2	DIA	Spectronaut	ROTS	3	0.56147	0.660679	0.981767	0.94679	0.623375	0.70622	0.84088	0.563788	0.662651	0.73178	0.504982	0.666667	0.854952	0	0	0	0	0	1	0	0	0.669051
DIA_dlfq_top3_top1	2	DIA	Spectronaut	ROTS	3	0.65061	0.660679	0.457858	0.96901	0.121865	0.648442	0.45078	0.563868	0.662651	0.607938	0.583782	0.746988	0.733955	0	0	1	0	0	0	0	0	0.870538
DIA_maxlfq_top3_top1	2	DIA	Spectronaut	ROTS	3	0.332503	0.648703	0.544906	0.864283	0.433198	0.397238	0.809884	0.330402	0.654618	0.494101	0.153694	0.746988	0.331378	0	1	0	0	0	0	0.0882353	0	0.585258
DIA_dlfq_maxlfq_top3_top1	2	DIA	Spectronaut	ROTS	4	0.505645	0.521956	0.665489	1	0.444198	0.591223	1	0.439616	0.534137	0.609594	0.399159	0.580321	1	0	0	0	0	0	0	0	0	0.566789
DIA_dlfq_maxlfq	3	DIA	Spectronaut	limma	2	0	0	0.985558	0	1	0.0174422	0.5547	0.101752	0	0	0.0547717	0	0.698331	0	0	0	0	1	1	0	0	0.81
DIA_dlfq_top3	3	DIA	Spectronaut	limma	2	0.927568	0.157773	0.304583	0.199259	0.230448	0.94619	0	0.893978	0.216495	0.925261	0.742915	0.216495	0.31958	0	0	1	0	1	0	0	0	0.570503
DIA_dlfq_top1	3	DIA	Spectronaut	limma	2	1	1	0.966331	0.905877	0.150427	1	0.0147748	1	1	1	0.314783	1	0.00451576	0	0	1	0	0	1	0	0	0.894666
DIA_maxlfq_top3	3	DIA	Spectronaut	limma	2	0.638091	0.141531	0.720592	0.114551	0.621971	0.636083	0.551573	0.46339	0.195876	0.748055	1	0.216495	0.146153	0	1	0	0	1	0	0.0933333	0	0.643119
DIA_maxlfq_top1	3	DIA	Spectronaut	limma	2	0.78382	0.983759	1	0.679894	0.748012	0.761326	0.569833	0.731776	0.979381	0.886089	0.333471	1	0	0	1	0	0	0	1	0.0933333	0	0.287865
DIA_top3_top1	3	DIA	Spectronaut	limma	2	0.125501	0.825986	0	0.818715	0	0	0.158053	0.184263	0.762887	0.282714	0.199195	1	0.597701	0	1	1	0	0	0	1	0	0
DIA_dlfq_maxlfq_top3	3	DIA	Spectronaut	limma	3	0.515247	0.099768	0.670244	0.315408	0.617473	0.533238	0.812847	0.486373	0.137457	0.557772	0.599229	0.14433	0.650899	0	0	0	0	1	0	0	0	0.480126
DIA_dlfq_maxlfq_top1	3	DIA	Spectronaut	limma	3	0.565168	0.661253	0.983963	0.952576	0.632813	0.592923	0.844004	0.611176	0.659794	0.628696	0.234342	0.666667	0.703794	0	0	0	0	0	1	0	0	0.703755
DIA_dlfq_top3_top1	3	DIA	Spectronaut	limma	3	0.694418	0.661253	0.423638	1	0.126958	0.64873	0.44692	0.692747	0.659794	0.735992	0.418965	0.738832	0.475585	0	0	1	0	0	0	0	0	0.571397
DIA_maxlfq_top3_top1	3	DIA	Spectronaut	limma	3	0.527105	0.650425	0.573531	0.889796	0.456661	0.465803	0.81898	0.45981	0.646048	0.638953	0.510888	0.738832	0.619698	0	1	0	0	0	0	0.0933333	0	0.405224
DIA_dlfq_maxlfq_top3_top1	3	DIA	Spectronaut	limma	4	0.571518	0.518175	0.662844	0.98529	0.458476	0.560173	1	0.562526	0.525773	0.640353	0.440856	0.572165	0.373162	0	0	0	0	0	0	0	0	0.169221
DIA_dlfq_maxlfq	3	DIA	Spectronaut	ROTS	2	0	0	0.985558	0	1	0.0174422	0.5547	0	0	0.416649	0	0	1	0	0	0	0	1	1	0	0	0.535802
DIA_dlfq_top3	3	DIA	Spectronaut	ROTS	2	0.927568	0.157773	0.304583	0.199259	0.230448	0.94619	0	0.721518	0.216495	0.870241	0.395692	0.216495	0.783754	0	0	1	0	1	0	0	0	0.715
DIA_dlfq_top1	3	DIA	Spectronaut	ROTS	2	1	1	0.966331	0.905877	0.150427	1	0.0147748	0.860836	1	0.915946	0.394168	1	0.110512	0	0	1	0	0	1	0	0	1
DIA_maxlfq_top3	3	DIA	Spectronaut	ROTS	2	0.638091	0.141531	0.720592	0.114551	0.621971	0.636083	0.551573	0.291391	0.195876	0.722834	0.316281	0.216495	0.169202	0	1	0	0	1	0	0.0933333	0	0.704358
DIA_maxlfq_top1	3	DIA	Spectronaut	ROTS	2	0.78382	0.983759	1	0.679894	0.748012	0.761326	0.569833	0.60133	0.979381	0.796446	0.21791	1	0.329331	0	1	0	0	0	1	0.0933333	0	0.378063
DIA_top3_top1	3	DIA	Spectronaut	ROTS	2	0.125501	0.825986	0	0.818715	0	0	0.158053	0.127461	0.762887	0.355851	0.502347	1	0.649246	0	1	1	0	0	0	1	0	0.42816
DIA_dlfq_maxlfq_top3	3	DIA	Spectronaut	ROTS	3	0.515247	0.099768	0.670244	0.315408	0.617473	0.533238	0.812847	0.337637	0.137457	0.669908	0.237324	0.14433	0.775582	0	0	0	0	1	0	0	0	0.974294
DIA_dlfq_maxlfq_top1	3	DIA	Spectronaut	ROTS	3	0.565168	0.661253	0.983963	0.952576	0.632813	0.592923	0.844004	0.487389	0.659794	0.709681	0.204026	0.666667	0.824055	0	0	0	0	0	1	0	0	0.4225
DIA_dlfq_top3_top1	3	DIA	Spectronaut	ROTS	3	0.694418	0.661253	0.423638	1	0.126958	0.64873	0.44692	0.569939	0.659794	0.714013	0.430736	0.738832	0.458619	0	0	1	0	0	0	0	0	0.922718
DIA_maxlfq_top3_top1	3	DIA	Spectronaut	ROTS	3	0.527105	0.650425	0.573531	0.889796	0.456661	0.465803	0.81898	0.340061	0.646048	0.625043	0.345513	0.738832	0.688705	0	1	0	0	0	0	0.0933333	0	0.469235
DIA_dlfq_maxlfq_top3_top1	3	DIA	Spectronaut	ROTS	4	0.571518	0.518175	0.662844	0.98529	0.458476	0.560173	1	0.433756	0.525773	0.679661	0.3044	0.572165	0.514626	0	0	0	0	0	0	0	0	0.456044
DIA_dlfq_maxlfq	4	DIA	Spectronaut	limma	2	0	0	1	0	1	0	0.228966	0.0316248	0	0.147542	0.604139	0	0.0576206	0	0	0	0	1	1	0	1	0.347198
DIA_dlfq_top3	4	DIA	Spectronaut	limma	2	0.821146	0.158999	0.160348	0.191758	0.276424	0.874133	0	0.544835	0.142857	0.384551	0.0442647	0.142857	0.24415	0	0	1	0	1	0	0	1	0.550741
DIA_dlfq_top1	4	DIA	Spectronaut	limma	2	1	1	0.928876	0.7153	0.143871	0.981646	0.0207504	0.906179	1	0.778521	0.0558879	1	0.0459851	0	0	1	0	0	1	0	1	0.808328
DIA_maxlfq_top3	4	DIA	Spectronaut	limma	2	0.729737	0.152542	0.662327	0.104118	0.550727	0.774333	0.442814	0.618173	0.134454	0.689321	1	0.142857	0.11826	0	1	0	0	1	0	0.0343138	0	0
DIA_maxlfq_top1	4	DIA	Spectronaut	limma	2	0.967499	0.993543	0.989327	0.577173	0.709355	1	0.430049	1	0.991597	1	0.992523	1	0.197535	0	1	0	0	0	1	0.0343138	0	0.243052
DIA_top3_top1	4	DIA	Spectronaut	limma	2	0.604269	0.834544	0	0.756081	0	0.704749	0.165411	0.518892	0.84874	0.336486	0	1	0.025431	0	1	1	0	0	0	1	0	0.423671
DIA_dlfq_maxlfq_top3	4	DIA	Spectronaut	limma	3	0.513609	0.103847	0.607558	0.259489	0.60905	0.549488	0.694665	0.398211	0.092437	0.407138	0.549468	0.095238	0.48653	0	0	0	0	1	0	0	1	0.731896
DIA_dlfq_maxlfq_top1	4	DIA	Spectronaut	limma	3	0.624182	0.664514	0.972734	0.924618	0.617742	0.660549	0.688661	0.645935	0.663866	0.642021	0.55085	0.666667	0.164902	0	0	0	0	0	1	0	1	0.628463
DIA_dlfq_top3_top1	4	DIA	Spectronaut	limma	3	0.815185	0.664514	0.363075	0.920561	0.140098	0.853509	0.522201	0.656635	0.663866	0.499852	0.0333842	0.714286	0	0	0	1	0	0	0	0	1	0.694516
DIA_maxlfq_top3_top1	4	DIA	Spectronaut	limma	3	0.773783	0.66021	0.550552	0.971375	0.420027	0.826361	0.837824	0.712355	0.658263	0.675269	0.664174	0.714286	0.127944	0	1	0	0	0	0	0.0343138	0	0.246478
DIA_dlfq_maxlfq_top3_top1	4	DIA	Spectronaut	limma	4	0.679114	0.523271	0.62348	1	0.44673	0.722477	1	0.603284	0.519608	0.55607	0.449469	0.547619	0.115676	0	0	0	0	0	0	0	1	0.677618
DIA_dlfq_maxlfq	4	DIA	Spectronaut	ROTS	2	0	0	1	0	1	0	0.228966	0	0	0	0.583847	0	0.351456	0	0	0	0	1	1	0	1	0.432852
DIA_dlfq_top3	4	DIA	Spectronaut	ROTS	2	0.821146	0.158999	0.160348	0.191758	0.276424	0.874133	0	0.540057	0.142857	0.275522	0.0167171	0.142857	0.333419	0	0	1	0	1	0	0	1	0.688881
DIA_dlfq_top1	4	DIA	Spectronaut	ROTS	2	1	1	0.928876	0.7153	0.143871	0.981646	0.0207504	0.898907	1	0.709478	0.0426858	1	0.193628	0	0	1	0	0	1	0	1	0.68018
DIA_maxlfq_top3	4	DIA	Spectronaut	ROTS	2	0.729737	0.152542	0.662327	0.104118	0.550727	0.774333	0.442814	0.591016	0.134454	0.617403	0.816037	0.142857	0.28245	0	1	0	0	1	0	0.0343138	0	0.448512
DIA_maxlfq_top1	4	DIA	Spectronaut	ROTS	2	0.967499	0.993543	0.989327	0.577173	0.709355	1	0.430049	0.975788	0.991597	0.956728	0.908226	1	0.281495	0	1	0	0	0	1	0.0343138	0	0.113806
DIA_top3_top1	4	DIA	Spectronaut	ROTS	2	0.604269	0.834544	0	0.756081	0	0.704749	0.165411	0.531594	0.84874	0.272084	0.00194887	1	0.165467	0	1	1	0	0	0	1	0	0.621772
DIA_dlfq_maxlfq_top3	4	DIA	Spectronaut	ROTS	3	0.513609	0.103847	0.607558	0.259489	0.60905	0.549488	0.694665	0.377024	0.092437	0.297641	0.4722	0.095238	0.926887	0	0	0	0	1	0	0	1	0.746131
DIA_dlfq_maxlfq_top1	4	DIA	Spectronaut	ROTS	3	0.624182	0.664514	0.972734	0.924618	0.617742	0.660549	0.688661	0.624898	0.663866	0.555402	0.511586	0.666667	0.572036	0	0	0	0	0	1	0	1	0.554022
DIA_dlfq_top3_top1	4	DIA	Spectronaut	ROTS	3	0.815185	0.664514	0.363075	0.920561	0.140098	0.853509	0.522201	0.656853	0.663866	0.419028	0.0204506	0.714286	0.680265	0	0	1	0	0	0	0	1	0.610609
DIA_maxlfq_top3_top1	4	DIA	Spectronaut	ROTS	3	0.773783	0.66021	0.550552	0.971375	0.420027	0.826361	0.837824	0.699466	0.658263	0.615405	0.575404	0.714286	0.498293	0	1	0	0	0	0	0.0343138	0	0.0607429
DIA_dlfq_maxlfq_top3_top1	4	DIA	Spectronaut	ROTS	4	0.679114	0.523271	0.62348	1	0.44673	0.722477	1	0.58956	0.519608	0.471869	0.39491	0.547619	1	0	0	0	0	0	0	0	1	1
DIA_dlfq_maxlfq	5	DIA	Spectronaut	limma	2	0	0	0.892912	0	1	0	0.407095	0.307582	0	0.175583	0.396047	0	0.430554	0	0	0	0	1	1	0	0	0.962884
DIA_dlfq_top3	5	DIA	Spectronaut	limma	2	0.894404	0.104524	0	0.138831	0.208117	0.944662	0	0.581488	0.113043	0.583138	0.140634	0.113043	0	0	0	1	0	1	0	0	0	0.842053
DIA_dlfq_top1	5	DIA	Spectronaut	limma	2	1	1	0.701899	0.716256	0.125382	1	0.0131838	0.900755	1	0.951047	0.089064	1	0.666753	0	0	1	0	0	1	0	0	0.9768
DIA_maxlfq_top3	5	DIA	Spectronaut	limma	2	0.776333	0.0858035	0.831447	0.0807156	0.672902	0.861855	0.508826	0.681835	0.0695652	0.656743	1	0.113043	0.00718523	0	1	0	0	1	0	0.151899	0	0.94438
DIA_maxlfq_top1	5	DIA	Spectronaut	limma	2	0.896817	0.981279	1	0.602019	0.782245	0.970112	0.510241	1	0.956522	1	0.848963	1	0.333674	0	1	0	0	0	1	0.151899	0	0.981366
DIA_top3_top1	5	DIA	Spectronaut	limma	2	0.449797	0.876755	0.0233668	0.697156	0	0.460127	0.131963	0.356926	0.843478	0.816384	0	1	0.746378	0	1	1	0	0	0	1	0	0.0363241
DIA_dlfq_maxlfq_top3	5	DIA	Spectronaut	limma	3	0.55527	0.0634426	0.574786	0.222032	0.627007	0.602172	0.750799	0.523635	0.0608696	0.471821	0.512227	0.0753623	0.15762	0	0	0	0	1	0	0	0	0.907359
DIA_dlfq_maxlfq_top1	5	DIA	Spectronaut	limma	3	0.617838	0.660426	0.864937	1	0.635876	0.656704	0.753205	0.736112	0.652174	0.708877	0.444691	0.666666	0.392139	0	0	0	0	0	1	0	0	0.953707
DIA_dlfq_top3_top1	5	DIA	Spectronaut	limma	3	0.782307	0.660426	0.241755	0.792185	0.111166	0.801596	0.444802	0.613056	0.652174	0.783523	0.0765661	0.704347	0.861403	0	0	1	0	0	0	0	0	0.902792
DIA_maxlfq_top3_top1	5	DIA	Spectronaut	limma	3	0.707728	0.647946	0.618271	0.883595	0.485049	0.764031	0.825675	0.679587	0.623188	0.824375	0.616321	0.704347	0.804533	0	1	0	0	0	0	0.151899	0	0.911927
DIA_dlfq_maxlfq_top3_top1	5	DIA	Spectronaut	limma	4	0.664661	0.50806	0.574937	0.965786	0.464774	0.706126	1	0.638098	0.497101	0.697149	0.412451	0.537681	0.776392	0	0	0	0	0	0	0	0	0.967982
DIA_dlfq_maxlfq	5	DIA	Spectronaut	ROTS	2	0	0	0.892912	0	1	0	0.407095	0	0	0	0.165705	0	0.199473	0	0	0	0	1	1	0	0	0.962895
DIA_dlfq_top3	5	DIA	Spectronaut	ROTS	2	0.894404	0.104524	0	0.138831	0.208117	0.944662	0	0.422203	0.113043	0.418985	0.0991265	0.113043	0.857585	0	0	1	0	1	0	0	0	0.898079
DIA_dlfq_top1	5	DIA	Spectronaut	ROTS	2	1	1	0.701899	0.716256	0.125382	1	0.0131838	0.767151	1	0.854594	0.0487042	1	0.416266	0	0	1	0	0	1	0	0	0.935166
DIA_maxlfq_top3	5	DIA	Spectronaut	ROTS	2	0.776333	0.0858035	0.831447	0.0807156	0.672902	0.861855	0.508826	0.35324	0.0695652	0.501572	0.518638	0.113043	0.746081	0	1	0	0	1	0	0.151899	0	0.916636
DIA_maxlfq_top1	5	DIA	Spectronaut	ROTS	2	0.896817	0.981279	1	0.602019	0.782245	0.970112	0.510241	0.737003	0.956522	0.910598	0.388298	1	0.360571	0	1	0	0	0	1	0.151899	0	0.921564
DIA_top3_top1	5	DIA	Spectronaut	ROTS	2	0.449797	0.876755	0.0233668	0.697156	0	0.460127	0.131963	0.258441	0.843478	0.673637	0.00299278	1	0.289932	0	1	1	0	0	0	1	0	0
DIA_dlfq_maxlfq_top3	5	DIA	Spectronaut	ROTS	3	0.55527	0.0634426	0.574786	0.222032	0.627007	0.602172	0.750799	0.258481	0.0608696	0.306852	0.261157	0.0753623	1	0	0	0	0	1	0	0	0	0.949122
DIA_dlfq_maxlfq_top1	5	DIA	Spectronaut	ROTS	3	0.617838	0.660426	0.864937	1	0.635876	0.656704	0.753205	0.501385	0.652174	0.588397	0.200903	0.666666	0.420846	0	0	0	0	0	1	0	0	0.962886
DIA_dlfq_top3_top1	5	DIA	Spectronaut	ROTS	3	0.782307	0.660426	0.241755	0.792185	0.111166	0.801596	0.444802	0.482598	0.652174	0.649072	0.0502745	0.704347	0.0764865	0	0	1	0	0	0	0	0	0.74449
DIA_maxlfq_top3_top1	5	DIA	Spectronaut	ROTS	3	0.707728	0.647946	0.618271	0.883595	0.485049	0.764031	0.825675	0.449561	0.623188	0.695269	0.30331	0.704347	0.384337	0	1	0	0	0	0	0.151899	0	0.918244
DIA_dlfq_maxlfq_top3_top1	5	DIA	Spectronaut	ROTS	4	0.664661	0.50806	0.574937	0.965786	0.464774	0.706126	1	0.423006	0.497101	0.559898	0.203911	0.537681	0.773548	0	0	0	0	0	0	0	0	1
DIA_dlfq_maxlfq	6	DIA	Spectronaut	limma	2	0	0.203361	0.553789	0.0820151	1	0	0.367997	0.406436	0.354837	0.0290161	0.280758	0	0.690079	0	0	0	0	1	1	0	0	0.935485
DIA_dlfq_top3	6	DIA	Spectronaut	limma	2	0.84147	0.260504	0	0.173887	0.326582	0.892736	0	0.653911	0.387095	0.0183672	0.24145	0.0499994	0.995648	0	0	1	0	1	0	0	0	0.835944
DIA_dlfq_top1	6	DIA	Spectronaut	limma	2	1	1	0.968399	0.630797	0.226245	1	0.0486512	0.898262	1	0.834666	0.180263	1	0.842921	0	0	1	0	0	1	0	0	0.947141
DIA_maxlfq_top3	6	DIA	Spectronaut	limma	2	0.492564	0	0.499903	0	0.782536	0.651388	0.474036	0.503903	0	0.19043	1	0.0499994	0.0049548	0	1	0	0	1	0	0.820106	0	0.772639
DIA_maxlfq_top1	6	DIA	Spectronaut	limma	2	0.740607	0.739496	1	0.444818	0.820946	0.843497	0.501527	0.915685	0.612903	0.948992	0.874609	1	0.0973284	0	1	0	0	0	1	0.820106	0	0.711661
DIA_top3_top1	6	DIA	Spectronaut	limma	2	0.087644	0.682353	0.198766	0.425135	0	0.0873213	0.19275	0	0.580644	0.0823602	0.00216319	1	0.146727	0	1	1	0	0	0	1	0	0
DIA_dlfq_maxlfq_top3	6	DIA	Spectronaut	limma	3	0.444489	0.154622	0.351231	0.361631	0.703039	0.514708	0.704108	0.521417	0.24731	0.0792711	0.507403	0.0333343	0.866885	0	0	0	0	1	0	0	0	0.989026
DIA_dlfq_maxlfq_top1	6	DIA	Spectronaut	limma	3	0.57626	0.647619	0.840729	0.964342	0.682397	0.614499	0.720668	0.740128	0.655913	0.604225	0.44521	0.666667	1	0	0	0	0	0	1	0	0	0.988257
DIA_dlfq_top3_top1	6	DIA	Spectronaut	limma	3	0.646956	0.647619	0.389055	0.741773	0.184276	0.660019	0.486944	0.517391	0.655913	0.311798	0.141292	0.683334	0.670318	0	0	1	0	0	0	0	0	0.935593
DIA_maxlfq_top3_top1	6	DIA	Spectronaut	limma	3	0.43966	0.47395	0.566223	0.783964	0.534494	0.527402	0.84867	0.473196	0.397848	0.407261	0.625591	0.683334	0.112208	0	1	0	0	0	0	0.820106	0	0.734464
DIA_dlfq_maxlfq_top3_top1	6	DIA	Spectronaut	limma	4	0.526761	0.480952	0.53681	1	0.526052	0.579157	1	0.563033	0.489246	0.350639	0.429874	0.516667	0.662544	0	0	0	0	0	0	0	0	0.94105
DIA_dlfq_maxlfq	6	DIA	Spectronaut	ROTS	2	0	0.203361	0.553789	0.0820151	1	0	0.367997	0.427605	0.354837	0	0.288728	0	0.91179	0	0	0	0	1	1	0	0	0.947228
DIA_dlfq_top3	6	DIA	Spectronaut	ROTS	2	0.84147	0.260504	0	0.173887	0.326582	0.892736	0	0.757912	0.387095	0.0939699	0.153735	0.0499994	0.39953	0	0	1	0	1	0	0	0	0.812583
DIA_dlfq_top1	6	DIA	Spectronaut	ROTS	2	1	1	0.968399	0.630797	0.226245	1	0.0486512	1	1	0.90803	0.118144	1	0.993367	0	0	1	0	0	1	0	0	0.847109
DIA_maxlfq_top3	6	DIA	Spectronaut	ROTS	2	0.492564	0	0.499903	0	0.782536	0.651388	0.474036	0.538635	0	0.251911	0.830218	0.0499994	0.278055	0	1	0	0	1	0	0.820106	0	0.676889
DIA_maxlfq_top1	6	DIA	Spectronaut	ROTS	2	0.740607	0.739496	1	0.444818	0.820946	0.843497	0.501527	0.951308	0.612903	1	0.746071	1	0.370018	0	1	0	0	0	1	0.820106	0	0.746787
DIA_top3_top1	6	DIA	Spectronaut	ROTS	2	0.087644	0.682353	0.198766	0.425135	0	0.0873213	0.19275	0.0989554	0.580644	0.155612	0	1	0	0	1	1	0	0	0	1	0	0.230596
DIA_dlfq_maxlfq_top3	6	DIA	Spectronaut	ROTS	3	0.444489	0.154622	0.351231	0.361631	0.703039	0.514708	0.704108	0.574718	0.24731	0.115293	0.424227	0.0333343	0.736863	0	0	0	0	1	0	0	0	1
DIA_dlfq_maxlfq_top1	6	DIA	Spectronaut	ROTS	3	0.57626	0.647619	0.840729	0.964342	0.682397	0.614499	0.720668	0.792971	0.655913	0.63601	0.384314	0.666667	0.843132	0	0	0	0	0	1	0	0	0.958764
DIA_dlfq_top3_top1	6	DIA	Spectronaut	ROTS	3	0.646956	0.647619	0.389055	0.741773	0.184276	0.660019	0.486944	0.618956	0.655913	0.385871	0.0906263	0.683334	0.900372	0	0	1	0	0	0	0	0	0.935855
DIA_maxlfq_top3_top1	6	DIA	Spectronaut	ROTS	3	0.43966	0.47395	0.566223	0.783964	0.534494	0.527402	0.84867	0.529633	0.397848	0.469174	0.52543	0.683334	0.408157	0	1	0	0	0	0	0.820106	0	0.876154
DIA_dlfq_maxlfq_top3_top1	6	DIA	Spectronaut	ROTS	4	0.526761	0.480952	0.53681	1	0.526052	0.579157	1	0.629069	0.489246	0.401587	0.356149	0.516667	0.769724	0	0	0	0	0	0	0	0	0.888007

## Sheet: view_combination_feature_cases
Supp. Data5. Tab2 The minmax scaled view combination features for TPD_dis dataset.
view_name	data_idx	acq	platform	dea	view_num	v_cr_pro	v_miss	v_HSIC	v_pca	v_mmd	v_mi	v_entropy	d_cr	d_miss	d_HSIC	d_mmd	d_mi	d_entropy	count_mr	dlfq_mr	maxlfq_mr	top0_mr	top1_mr	top3_mr	comb_mr	mr_reduce
DIA_dlfq_maxlfq	0	DIA	DIANN	limma	2	0.294211	0	1	0	0.999997	0.806537	0.0358383	0.53204	0.537378	0.812585	0.425767	0	0.0355724	0	0	0	0	1	1	0	1
DIA_dlfq_top3	0	DIA	DIANN	limma	2	0.967724	0.362758	1	0.386673	0.999997	1	0	0.856617	0.629469	0.927406	1	0.199063	0.011285	0	0	1	0	1	0	5.47938e-05	0.95122
DIA_dlfq_top1	0	DIA	DIANN	limma	2	1	1	1	0.716351	1	0.615998	0.212934	1	1	1	0.73157	1	0	0	0	1	0	0	1	5.97751e-05	0.946785
DIA_maxlfq_top3	0	DIA	DIANN	limma	2	0.267494	0.045958	2.53221e-07	0.000467755	1.02189e-05	0.61108	0.191579	0.241423	0	0.352773	0.131379	0.196721	0.736676	0	1	0	0	1	0	0.465593	0
DIA_maxlfq_top1	0	DIA	DIANN	limma	2	0.292212	0.683206	7.11266e-09	0.272875	1.45552e-05	0.349619	0.34391	0.537598	0.370531	0.545958	0.0559109	0.997658	0.756263	0	1	0	0	0	1	0.465593	0
DIA_top3_top1	0	DIA	DIANN	limma	2	0	0.320374	0	0.257245	0	0	0.41034	0	0.27844	0	0	0.997658	0.7608	0	1	1	0	0	0	1	0
DIA_dlfq_maxlfq_top3	0	DIA	DIANN	limma	3	0.462271	0.136239	0.666667	0.452322	0.666668	0.805872	0.585235	0.54336	0.388949	0.697588	0.519049	0.131928	0.387399	0	0	0	0	1	0	0	1
DIA_dlfq_maxlfq_top1	0	DIA	DIANN	limma	3	0.419344	0.561069	0.666667	0.740585	0.666671	0.590718	0.724534	0.689879	0.63597	0.786181	0.404416	0.665886	0.422608	0	0	0	0	0	1	0	1
DIA_dlfq_top3_top1	0	DIA	DIANN	limma	3	0.768864	0.561044	0.666667	1	0.666666	0.538666	0.716718	0.618872	0.63597	0.642469	0.57719	0.73224	0.43418	0	0	1	0	0	0	5.47938e-05	0.95122
DIA_maxlfq_top3_top1	0	DIA	DIANN	limma	3	0.237936	0.349846	8.67781e-08	0.532513	8.25806e-06	0.320233	0.811093	0.259674	0.216324	0.299577	0.0624298	0.730679	1	0	1	0	0	0	0	0.465593	0
DIA_dlfq_maxlfq_top3_top1	0	DIA	DIANN	limma	4	0.448354	0.402049	0.5	0.905264	0.500003	0.563872	1	0.527946	0.469303	0.606454	0.390771	0.565183	0.852527	0	0	0	0	0	0	0	1
Supp. Data5. Tab3 The minmax scaled view combination features for TPD_ret dataset.
view_name	data_idx	acq	platform	dea	view_num	v_cr_pro	v_miss	v_HSIC	v_pca	v_mmd	v_mi	v_entropy	d_cr	d_miss	d_HSIC	d_mmd	d_mi	d_entropy	count_mr	dlfq_mr	maxlfq_mr	top0_mr	top1_mr	top3_mr	comb_mr	mr_reduce
DIA_dlfq_maxlfq	0	DIA	DIANN	limma	2	0.345718	0	1	0	0.999999	0.841483	0.0715762	0.432699	0.434644	0.785971	0.255893	0	0.201763	0	0	0	0	1	1	0	1
DIA_dlfq_top3	0	DIA	DIANN	limma	2	1	0.389032	1	0.434524	1	1	0	0.879819	0.54729	0.93122	1	0.20075	0.113967	0	0	1	0	1	0	1.37283e-05	0.99722
DIA_dlfq_top1	0	DIA	DIANN	limma	2	0.99327	1	1	0.790046	1	0.591535	0.263707	1	1	1	0.564959	1	0	0	0	1	0	0	1	0.000237957	0.951807
DIA_maxlfq_top3	0	DIA	DIANN	limma	2	0.347773	0.156626	6.56029e-07	0.156501	3.91276e-05	0.655077	0.0958053	0.261284	0	0.521714	0.244073	0.19137	0.126974	0	1	0	0	1	0	0.370897	0
DIA_maxlfq_top1	0	DIA	DIANN	limma	2	0.348483	0.767871	4.84302e-07	0.455485	4.90168e-05	0.363708	0.285443	0.554305	0.45271	0.722209	0.0703369	0.990619	0.939856	0	1	0	0	0	1	0.370897	0
DIA_top3_top1	0	DIA	DIANN	limma	2	0	0.378822	0	0.45367	0	0	0.40966	0	0.337938	0	0	0.990619	0.188513	0	1	1	0	0	0	1	0
DIA_dlfq_maxlfq_top3	0	DIA	DIANN	limma	3	0.504153	0.181886	0.666667	0.43578	0.666679	0.832187	0.583126	0.524601	0.327311	0.746301	0.499988	0.130707	0.438557	0	0	0	0	1	0	0	1
DIA_dlfq_maxlfq_top1	0	DIA	DIANN	limma	3	0.448774	0.58929	0.666667	0.765437	0.666683	0.598908	0.74967	0.662335	0.629118	0.83606	0.297063	0.66354	0.228149	0	0	0	0	0	1	0	1
DIA_dlfq_top3_top1	0	DIA	DIANN	limma	3	0.808504	0.589285	0.666667	1	0.666667	0.530512	0.758502	0.626606	0.628409	0.64374	0.521653	0.730457	0.214699	0	0	1	0	0	0	1.37283e-05	0.99722
DIA_maxlfq_top3_top1	0	DIA	DIANN	limma	3	0.293664	0.43444	3.8011e-07	0.678337	2.93814e-05	0.339595	0.761537	0.271863	0.263549	0.414641	0.104803	0.724203	1	0	1	0	0	0	0	0.370897	0
DIA_dlfq_maxlfq_top3_top1	0	DIA	DIANN	limma	4	0.485447	0.448725	0.5	0.905405	0.500014	0.5753	1	0.521351	0.462097	0.660186	0.355877	0.562226	0.380833	0	0	0	0	0	0	0	1
Supp. Data5. Tab4 The minmax scaled view combination features forCRC dataset.
view_name	data_idx	acq	platform	dea	view_num	v_cr_pro	v_miss	v_HSIC	v_pca	v_mmd	v_mi	v_entropy	d_cr	d_miss	d_HSIC	d_mmd	d_mi	d_entropy	count_mr	dlfq_mr	maxlfq_mr	top0_mr	top1_mr	top3_mr	comb_mr	mr_reduce
DIA_dlfq_maxlfq	0	DIA	Spectronaut	limma	2	0.569988	0.713109	0.999687	0.107286	0.1121	0.844968	0.0897907	0.72454	0.696751	0.766142	0.900405	0	0.360665	0	0	0	0	1	1	0	0
DIA_dlfq_top3	0	DIA	Spectronaut	limma	2	0.93392	0.833787	1	0.194865	0.26225	1	0	0.968629	0.830325	0.938557	0.949955	0.440476	0.0335303	0	0	1	0	1	0	0	0
DIA_dlfq_top1	0	DIA	Spectronaut	limma	2	1	1	0.997671	0.394594	1	0.913815	0.0338226	1	1	1	1	1	0	0	0	1	0	0	1	0	0
DIA_maxlfq_top3	0	DIA	Spectronaut	limma	2	0.0965218	0	0.579352	0	0	0.164606	0.420243	0	0	0	0	0.440476	0.338119	0	1	0	0	1	0	0.873565	0
DIA_maxlfq_top1	0	DIA	Spectronaut	limma	2	0.221605	0.166213	0.710098	0.290729	0.663816	0.275337	0.491583	0.139386	0.169675	0.339544	0.0139718	1	0.400724	0	1	0	0	0	1	0.873565	0
DIA_top3_top1	0	DIA	Spectronaut	limma	2	0	0.0455344	0	0.225557	0.241545	0	0.550451	0.0228905	0.0361011	0.0635666	0.00125127	1	0.849288	0	1	1	0	0	0	1	0
DIA_dlfq_maxlfq_top3	0	DIA	Spectronaut	limma	3	0.542004	0.515632	0.85968	0.579405	0.124783	0.669858	0.363391	0.56439	0.509025	0.568233	0.616787	0.293651	0.226041	0	0	0	0	1	0	0	0
DIA_dlfq_maxlfq_top1	0	DIA	Spectronaut	limma	3	0.6125	0.626441	0.902485	0.821134	0.591972	0.67804	0.411268	0.621308	0.622142	0.701895	0.638126	0.666667	0.211694	0	0	0	0	0	1	0	0
DIA_dlfq_top3_top1	0	DIA	Spectronaut	limma	3	0.686085	0.626441	0.66589	0.743762	0.501265	0.637938	0.43239	0.66384	0.622142	0.667375	0.650402	0.813492	0.246135	0	0	1	0	0	0	0	0
DIA_maxlfq_top3_top1	0	DIA	Spectronaut	limma	3	0.11257	0.0705823	0.429817	0.576938	0.301787	0.146648	1	0.054092	0.0685921	0.13437	0.00507435	0.813492	1	0	1	0	0	0	0	0.873565	0
DIA_dlfq_maxlfq_top3_top1	0	DIA	Spectronaut	limma	4	0.49811	0.459774	0.714468	1	0.379952	0.533121	0.787726	0.475907	0.455475	0.517968	0.477597	0.646825	0.498819	0	0	0	0	0	0	0	0
Supp. Data5. Tab5 The minmax scaled view combination features for U2OS bulk dataset.
view_name	data_idx	acq	platform	dea	view_num	v_cr_pro	v_miss	v_HSIC	v_pca	v_mmd	v_mi	v_entropy	d_cr	d_miss	d_HSIC	d_mmd	d_mi	d_entropy	count_mr	dlfq_mr	maxlfq_mr	top0_mr	top1_mr	top3_mr	comb_mr	mr_reduce
DDA_dlfq_maxlfq	0	DDA	Maxquant	limma	2	0	1	0.538247	0.785533	0.926073	0.27587	0.0957862	0	1	0.765516	0.17333	0.825	0.289277	1	0	0	1	0	1	0.0863059	0
DDA_dlfq_top0	0	DDA	Maxquant	limma	2	0.498216	0.288613	0.449552	0.28795	0.0343764	0.262409	0	0.312084	0.275888	0.495452	0.0252386	0	0.760379	1	0	1	0	0	1	0.0678557	0.140625
DDA_dlfq_top3	0	DDA	Maxquant	limma	2	0.413092	0.308775	0.652379	0.346842	0.0571123	0.240883	0.104429	0.286705	0.29142	0.514748	0	0.0183333	0.459707	1	0	1	1	0	0	0.0697007	0.126562
DDA_dlfq_count	0	DDA	Maxquant	limma	2	0.988025	0.728887	1	0.276094	1	0.983449	0.998127	0.952763	0.825074	1	0.693256	0.6575	0.79401	0	0	1	1	0	1	0.00143501	0.646875
DDA_maxlfq_top0	0	DDA	Maxquant	limma	2	0.393515	0.711768	0.342061	0.749615	0.542048	0.436447	0.0989451	0.209647	0.723373	0.713525	0.296023	0.825	0.436292	1	1	0	0	0	1	0.552276	0
DDA_maxlfq_top3	0	DDA	Maxquant	limma	2	0.350322	0.70454	0	0.80855	0.35062	0.429218	0.139613	0.253368	0.715237	0.759693	0.253476	0.83	0.233714	1	1	0	1	0	0	0.576261	0.09375
DDA_maxlfq_count	0	DDA	Maxquant	limma	2	0.905191	0.515978	0.185233	0.274098	0.770267	0.877233	1	0.8257	0.43824	0.743193	1	1	0.735546	0	1	0	1	0	1	1	1
DDA_top0_top3	0	DDA	Maxquant	limma	2	0.149421	0	0.291915	0	0	0	0.061884	0.124609	0	0	0.000757119	0.01	0.726434	1	1	1	0	0	0	0.552276	0
DDA_top0_count	0	DDA	Maxquant	limma	2	0.773428	0.419604	0.637337	0.262113	0.436953	0.885053	0.999467	0.790543	0.54179	0.699068	0.403329	0.654167	0.947904	0	1	1	0	0	1	0.48442	0.517188
DDA_top3_count	0	DDA	Maxquant	limma	2	1	0.427593	0.61644	0.283858	0.653201	1	0.999352	1	0.538831	0.789899	0.586863	0.661667	0.644613	0	1	1	1	0	0	0.496105	0.704688
DDA_dlfq_maxlfq_top0	0	DDA	Maxquant	limma	3	0.327827	0.666793	0.443287	0.932443	0.500833	0.324909	0.193075	0.17391	0.66642	0.658165	0.164864	0.55	0.740605	1	0	0	0	0	1	0.0678557	0.140625
DDA_dlfq_maxlfq_top3	0	DDA	Maxquant	limma	3	0.233001	0.671105	0.396875	0.979884	0.444602	0.315324	0.248344	0.180024	0.668886	0.679986	0.142269	0.557778	0.552323	1	0	0	1	0	0	0.0697007	0.126562
DDA_dlfq_maxlfq_count	0	DDA	Maxquant	limma	3	0.646894	0.748288	0.574493	0.769236	0.89878	0.712184	0.999389	0.592821	0.754438	0.836236	0.622195	0.8275	0.206541	0	0	0	1	0	1	0.00143501	0.646875
DDA_dlfq_top0_top3	0	DDA	Maxquant	limma	3	0.35427	0.199129	0.464615	0.341186	0.0304962	0.167764	0.222312	0.241133	0.189103	0.336733	0.00866523	0.00944444	0.947875	1	0	1	0	0	0	0.0678557	0.140625
DDA_dlfq_top0_count	0	DDA	Maxquant	limma	3	0.689863	0.479035	0.69563	0.502863	0.490443	0.710303	0.998396	0.68513	0.547584	0.731507	0.373941	0.437222	0.357127	0	0	1	0	0	1	0	0.657813
DDA_dlfq_top3_count	0	DDA	Maxquant	limma	3	0.686571	0.488418	0.756273	0.550484	0.570104	0.741444	0.998054	0.74649	0.551775	0.768216	0.426706	0.445833	0	0	0	1	1	0	0	0.000410004	0.654687
DDA_maxlfq_top0_top3	0	DDA	Maxquant	limma	3	0.244404	0.472102	0.211326	0.726651	0.297556	0.288555	0.201473	0.195875	0.479536	0.491073	0.183419	0.555	0.711799	1	1	0	0	0	0	0.552276	0
DDA_maxlfq_top0_count	0	DDA	Maxquant	limma	3	0.687866	0.549117	0.38821	0.739622	0.583089	0.732911	0.999969	0.60863	0.567801	0.718595	0.566451	0.826389	0.394993	0	1	0	0	0	1	0.48442	0.517188
DDA_maxlfq_top3_count	0	DDA	Maxquant	limma	3	0.753368	0.54937	0.267224	0.789468	0.591363	0.768817	0.999848	0.693023	0.564103	0.764262	0.613446	0.830556	0.0292987	0	1	0	1	0	0	0.49549	0.709375
DDA_top0_top3_count	0	DDA	Maxquant	limma	3	0.534492	0.282399	0.515231	0.307438	0.363385	0.628351	0.999241	0.638384	0.360207	0.496322	0.330316	0.441944	0.112049	0	1	1	0	0	0	0.48442	0.517188
DDA_dlfq_maxlfq_top0_top3	0	DDA	Maxquant	limma	4	0.290195	0.502283	0.379026	0.898716	0.318372	0.274138	0.311948	0.197736	0.500986	0.541489	0.124804	0.418056	1	1	0	0	0	0	0	0.0678557	0.140625
DDA_dlfq_maxlfq_top0_count	0	DDA	Maxquant	limma	4	0.562264	0.610808	0.525405	0.955806	0.618286	0.620077	0.999153	0.515123	0.634061	0.736126	0.431863	0.660278	0.764105	0	0	0	0	0	1	0	0.657813
DDA_dlfq_maxlfq_top3_count	0	DDA	Maxquant	limma	4	0.528198	0.614295	0.498716	1	0.626212	0.634442	0.998861	0.553089	0.6348	0.762175	0.451154	0.665417	0.431507	0	0	0	1	0	0	0.000410004	0.654687
DDA_dlfq_top0_top3_count	0	DDA	Maxquant	limma	4	0.565922	0.362245	0.607937	0.571324	0.363607	0.561966	0.997495	0.577784	0.412167	0.583194	0.284907	0.333611	0.700691	0	0	1	0	0	0	0	0.657813
DDA_maxlfq_top0_top3_count	0	DDA	Maxquant	limma	4	0.499472	0.463247	0.345498	0.786434	0.458848	0.604659	0.999645	0.533978	0.492912	0.617563	0.423408	0.663472	0.743604	0	1	0	0	0	0	0.48442	0.517188
DDA_dlfq_maxlfq_top0_top3_count	0	DDA	Maxquant	limma	5	0.488926	0.510576	0.471316	0.998436	0.477065	0.539056	0.998329	0.475542	0.534985	0.648109	0.343227	0.548167	0.871248	0	0	0	0	0	0	0	0.657813
Supp. Data5. Tab6 The minmax scaled view combination features for U2OS single cell dataset.
view_name	data_idx	acq	platform	dea	view_num	v_cr_pro	v_miss	v_HSIC	v_pca	v_mmd	v_mi	v_entropy	d_cr	d_miss	d_HSIC	d_mmd	d_mi	d_entropy	count_mr	dlfq_mr	maxlfq_mr	top0_mr	top1_mr	top3_mr	comb_mr	mr_reduce
DIA_dlfq_maxlfq	0	DIA	DIANN	limma	2	0.305856	0	0.99884	0.210998	0.810206	1	0	0.596122	0	0	0.331773	0	0	0	0	0	0	1	1	0	1
DIA_dlfq_top3	0	DIA	DIANN	limma	2	0.947492	0.537859	0.998921	0.438878	0.822485	0.690664	0.321509	1	0.490446	0.592343	0.634801	0.490446	0.304777	0	0	1	0	1	0	0.00435573	0.69883
DIA_dlfq_top1	0	DIA	DIANN	limma	2	1	1	1	0.544755	1	0.274821	0.564819	0.64695	1	0.956306	1	1	0.270612	0	0	1	0	0	1	0.00494777	0.657895
DIA_maxlfq_top3	0	DIA	DIANN	limma	2	0.24828	0.0985951	0	0	0	0.43521	0.425028	0.350541	0	0.570952	0.000298098	0.484076	1	0	1	0	0	1	0	0.442466	0
DIA_maxlfq_top1	0	DIA	DIANN	limma	2	0.355047	0.561896	0.16831	0.118149	0.010075	0.163801	0.631061	0.370229	0.509554	1	0.143985	0.993631	0.569728	0	1	0	0	0	1	0.442466	0
DIA_top3_top1	0	DIA	DIANN	limma	2	0	0.0155	0.15598	0.0412154	0.00849247	0	0.76242	0	0.0191083	0.81063	0	0.993631	0.604309	0	1	1	0	0	0	1	0
DIA_dlfq_maxlfq_top3	0	DIA	DIANN	limma	3	0.438108	0.212151	0.66592	0.647997	0.54423	0.708625	0.868966	0.648888	0.163482	0.387765	0.322291	0.324841	0.633622	0	0	0	0	1	0	0	1
DIA_dlfq_maxlfq_top1	0	DIA	DIANN	limma	3	0.430582	0.520632	0.722383	0.733277	0.60676	0.479541	0.923591	0.537767	0.503185	0.652102	0.491919	0.664544	0.301783	0	0	0	0	0	1	0	1
DIA_dlfq_top3_top1	0	DIA	DIANN	limma	3	0.806749	0.517786	0.7183	0.838903	0.610326	0.321828	0.959742	0.548983	0.503185	0.786426	0.544934	0.828025	0.405483	0	0	1	0	0	0	0.00435573	0.69883
DIA_maxlfq_top3_top1	0	DIA	DIANN	limma	3	0.286619	0.225331	0.108097	0.365722	0.00618915	0.19967	0.964038	0.240256	0.176221	0.793861	0.0480945	0.823779	0.562718	0	1	0	0	0	0	0.442466	0
DIA_dlfq_maxlfq_top3_top1	0	DIA	DIANN	limma	4	0.456451	0.368975	0.553675	1	0.441876	0.427416	1	0.493974	0.336518	0.655039	0.35181	0.660297	0.309119	0	0	0	0	0	0	0	1

## Sheet: predicted_performance
Supp. Data5. Tab7 The performances of the 5-fold cv for evaluation of the optimal view_combindation recommendation.				Supp. Data5. Tab8 Predicted performance of the view_combinations used as inputs for MCP tested on TPD_dis data.
dataset	Spearman			view_name	data_idx	acq	platform	dea	view_num	pred_mcc
DIANN_0	0.542883			DIA_dlfq_maxlfq	0	DIA	DIANN	limma	2	0.730491
DIANN_1	-0.405208			DIA_dlfq_top3	0	DIA	DIANN	limma	2	0.72322
DIANN_2	0.347753			DIA_dlfq_top1	0	DIA	DIANN	limma	2	0.674734
DIANN_3	0.109574			DIA_maxlfq_top3	0	DIA	DIANN	limma	2	0.588787
DIANN_4	0.191069			DIA_maxlfq_top1	0	DIA	DIANN	limma	2	0.45547
DIANN_5	0.283776			DIA_top3_top1	0	DIA	DIANN	limma	2	0.327859
DIANN_6	-0.0254597			DIA_dlfq_maxlfq_top3	0	DIA	DIANN	limma	3	0.733091
FragPipe_0	0.797438			DIA_dlfq_maxlfq_top1	0	DIA	DIANN	limma	3	0.719846
FragPipe_1	0.566883			DIA_dlfq_top3_top1	0	DIA	DIANN	limma	3	0.711779
FragPipe_10	0.686219			DIA_maxlfq_top3_top1	0	DIA	DIANN	limma	3	0.504763
FragPipe_11	0.831202			DIA_dlfq_maxlfq_top3_top1	0	DIA	DIANN	limma	4	0.633084
FragPipe_2	0.523028
FragPipe_3	0.787038
FragPipe_4	0.40387			Supp. Data5. Tab9 Predicted performance of the view_combinations used as inputs for MCP tested on TPD_ret data.
FragPipe_5	0.365507			view_name	data_idx	acq	platform	dea	view_num	pred_mcc
FragPipe_6	-0.121474			DIA_dlfq_maxlfq	0	DIA	DIANN	limma	2	0.733206
FragPipe_7	-0.408158			DIA_dlfq_top3	0	DIA	DIANN	limma	2	0.72322
FragPipe_9	0.719013			DIA_dlfq_top1	0	DIA	DIANN	limma	2	0.674734
Maxquant_0	0.816305			DIA_maxlfq_top3	0	DIA	DIANN	limma	2	0.594092
Maxquant_1	0.846694			DIA_maxlfq_top1	0	DIA	DIANN	limma	2	0.443437
Maxquant_10	0.652037			DIA_top3_top1	0	DIA	DIANN	limma	2	0.327859
Maxquant_11	0.537368			DIA_dlfq_maxlfq_top3	0	DIA	DIANN	limma	3	0.737266
Maxquant_2	0.805048			DIA_dlfq_maxlfq_top1	0	DIA	DIANN	limma	3	0.719846
Maxquant_3	0.661442			DIA_dlfq_top3_top1	0	DIA	DIANN	limma	3	0.701141
Maxquant_4	-0.163796			DIA_maxlfq_top3_top1	0	DIA	DIANN	limma	3	0.415532
Maxquant_5	0.25258			DIA_dlfq_maxlfq_top3_top1	0	DIA	DIANN	limma	4	0.620633
Maxquant_6	-0.0399128
Maxquant_7	0.486908
Maxquant_9	0.827386			Supp. Data5. Tab10 Predicted performance of the view_combinations used as inputs for MCP tested on CRC data.
Spectronaut_0	0.413697			view_name	data_idx	acq	platform	dea	view_num	pred_mcc
Spectronaut_1	-0.22021			DIA_dlfq_maxlfq	0	DIA	Spectronaut	limma	2	0.8021
Spectronaut_2	0.146169			DIA_dlfq_top3	0	DIA	Spectronaut	limma	2	0.782905
Spectronaut_3	0.606729			DIA_dlfq_top1	0	DIA	Spectronaut	limma	2	0.77518
Spectronaut_4	0.132956			DIA_maxlfq_top3	0	DIA	Spectronaut	limma	2	0.501312
Spectronaut_5	0.0683809			DIA_maxlfq_top1	0	DIA	Spectronaut	limma	2	0.467896
Spectronaut_6	0.551159			DIA_top3_top1	0	DIA	Spectronaut	limma	2	0.327859
				DIA_dlfq_maxlfq_top3	0	DIA	Spectronaut	limma	3	0.809516
				DIA_dlfq_maxlfq_top1	0	DIA	Spectronaut	limma	3	0.779218
				DIA_dlfq_top3_top1	0	DIA	Spectronaut	limma	3	0.75581
				DIA_maxlfq_top3_top1	0	DIA	Spectronaut	limma	3	0.313837
				DIA_dlfq_maxlfq_top3_top1	0	DIA	Spectronaut	limma	4	0.787648
				Supp. Data5. Tab11 Predicted performance of the view_combinations used as inputs for MCP tested on U2OS bulk data.
				view_name	data_idx	acq	platform	dea	view_num	pred_mcc
				DDA_dlfq_maxlfq	0	DDA	Maxquant	limma	2	0.552235
				DDA_dlfq_top0	0	DDA	Maxquant	limma	2	0.723662
				DDA_dlfq_top3	0	DDA	Maxquant	limma	2	0.712295
				DDA_dlfq_count	0	DDA	Maxquant	limma	2	0.637382
				DDA_maxlfq_top0	0	DDA	Maxquant	limma	2	0.380067
				DDA_maxlfq_top3	0	DDA	Maxquant	limma	2	0.379018
				DDA_maxlfq_count	0	DDA	Maxquant	limma	2	0.358692
				DDA_top0_top3	0	DDA	Maxquant	limma	2	0.53371
				DDA_top0_count	0	DDA	Maxquant	limma	2	0.487153
				DDA_top3_count	0	DDA	Maxquant	limma	2	0.477948
				DDA_dlfq_maxlfq_top0	0	DDA	Maxquant	limma	3	0.689585
				DDA_dlfq_maxlfq_top3	0	DDA	Maxquant	limma	3	0.689585
				DDA_dlfq_maxlfq_count	0	DDA	Maxquant	limma	3	0.6122
				DDA_dlfq_top0_top3	0	DDA	Maxquant	limma	3	0.723662
				DDA_dlfq_top0_count	0	DDA	Maxquant	limma	3	0.669466
				DDA_dlfq_top3_count	0	DDA	Maxquant	limma	3	0.669466
				DDA_maxlfq_top0_top3	0	DDA	Maxquant	limma	3	0.408864
				DDA_maxlfq_top0_count	0	DDA	Maxquant	limma	3	0.300133
				DDA_maxlfq_top3_count	0	DDA	Maxquant	limma	3	0.300133
				DDA_top0_top3_count	0	DDA	Maxquant	limma	3	0.505595
				DDA_dlfq_maxlfq_top0_top3	0	DDA	Maxquant	limma	4	0.715076
				DDA_dlfq_maxlfq_top0_count	0	DDA	Maxquant	limma	4	0.686262
				DDA_dlfq_maxlfq_top3_count	0	DDA	Maxquant	limma	4	0.685414
				DDA_dlfq_top0_top3_count	0	DDA	Maxquant	limma	4	0.694435
				DDA_maxlfq_top0_top3_count	0	DDA	Maxquant	limma	4	0.347744
				DDA_dlfq_maxlfq_top0_top3_count	0	DDA	Maxquant	limma	5	0.662984
				Supp. Data5. Tab12 Predicted performance of the view_combinations used as inputs for MCP tested on U2OS single cell data.
				view_name	data_idx	acq	platform	dea	view_num	pred_mcc
				DIA_dlfq_maxlfq	0	DIA	DIANN	limma	2	0.753625
				DIA_dlfq_top3	0	DIA	DIANN	limma	2	0.721438
				DIA_dlfq_top1	0	DIA	DIANN	limma	2	0.654682
				DIA_maxlfq_top3	0	DIA	DIANN	limma	2	0.568696
				DIA_maxlfq_top1	0	DIA	DIANN	limma	2	0.440677
				DIA_top3_top1	0	DIA	DIANN	limma	2	0.330987
				DIA_dlfq_maxlfq_top3	0	DIA	DIANN	limma	3	0.744682
				DIA_dlfq_maxlfq_top1	0	DIA	DIANN	limma	3	0.719846
				DIA_dlfq_top3_top1	0	DIA	DIANN	limma	3	0.653806
				DIA_maxlfq_top3_top1	0	DIA	DIANN	limma	3	0.48456
				DIA_dlfq_maxlfq_top3_top1	0	DIA	DIANN	limma	4	0.694584

## Sheet: feature_importance
Supp. Data5. Tab13 The feature importance for optimal view combination recommendation.
Feature Name	Importance
dlfq_mr	8.61699
v_pca	2.19978
d_mi	1.797
comb_mr	1.75327
d_miss	1.13229
v_entropy	1.0493
v_mi	0.89684
mr_reduce	0.885878
d_cr	0.872026
v_mmd	0.844133
v_HSIC	0.790244
v_miss	0.759693
d_HSIC	0.505915
v_cr_pro	0.479544
d_mmd	0.382075
Supp. Data5. Tab14 The SHAP values in the SHAP analysis.											Supp. Data5. Tab15 The input values in the SHAP analysis.
dlfq_mr	comb_mr	v_pca	v_entropy	d_mi	mr_reduce	v_mi	v_HSIC	d_HSIC	d_miss		dlfq_mr	comb_mr	v_pca	v_entropy	d_mi	mr_reduce	v_mi	v_HSIC	d_HSIC	d_miss
0.0585602	0.0384689	0.0127367	0.0172772	0.0076452	-0.00868761	-0.0249906	0.00203684	0.00800301	0.000521233		0	0	0.0383427	0.460911	0.665904	0.716045	0	0.498497	0.143731	0.794366
0.0616087	0.0388768	0.0120444	0.0210497	0.00557006	-0.00868761	0.00587228	0.00203684	0.00863641	0.000521233		0	0	0.268667	0.0423321	0.75286	0.948656	0.782624	0.504343	0.456421	0.847887
0.082609	0.0636557	-0.0168217	0.0198124	-0.00905293	-0.00868761	0.023632	0.00867613	-0.00236199	-0.0188789		0	0	0.736308	0	1	1	1	1	0.856878	1
-0.0592563	-0.0593257	0.0428803	0.0179596	0.027369	0.0114229	0.00681327	-0.00681355	0.000577761	0.00684902		1	0.7548	0	0.623868	0	0	0.683614	0.217906	0.621693	0
-0.0564911	-0.0604342	0.0393693	0.0171301	0.0196026	0.0149889	0.0158752	0.00255417	-0.0158314	0.00621164		1	0.7548	0.345512	0.589975	0.24714	0	0.998768	0.627979	1	0.152113
-0.0734537	-0.14918	0.0404014	0.0127607	0.0232362	0.0114229	-0.0337192	-0.00173843	0.0115554	0.00633729		1	1	0.505376	0.179419	0.24714	0	0.203863	0	0.561446	0.0985916
0.0579202	0.0386911	0.0120444	0.020503	0.0156185	-0.00839231	0.00205501	-0.00571859	0.00802508	0.000841289		0	0	0.343131	0.803526	0.472921	0.716045	0.488746	0.406916	0.407282	0.547418
0.0798811	0.0397276	-0.0168217	0.0202201	0.00571179	-0.00868761	0.00587228	0.00442049	-0.00297331	0.000521233		0	0	0.859484	0.788049	0.637681	0.716045	0.666256	0.708826	0.66687	0.648826
0.0846591	0.0417747	-0.00951287	0.0137408	0.00557006	-0.00868761	0.00587228	0.00203684	0.00295656	0.000521233		0	0	1	0.483212	0.666667	0.948656	0.662162	0.501448	0.624915	0.648826
-0.0905825	-0.0627242	-0.047297	0.017413	0.027369	0.0114229	0.00205501	-0.00681355	-0.00187987	0.00684902		1	0.7548	0.67825	0.90412	0.16476	0	0.628748	0.281962	0.727713	0.0835681
0.0826696	0.0368556	0.0120263	-0.0364834	0.0142565	-0.00839231	0.000591457	-0.00763532	0.00795425	0.000841289		0	0	0.972194	1	0.485507	0.716045	0.611478	0.474788	0.606695	0.48216
0.0585602	0.0384689	0.0127367	0.0172772	0.0076452	-0.00868761	-0.0249906	0.00203684	0.00800301	0.000521233		0	0	0.0383427	0.460911	0.665904	0.716045	0	0.498497	0	0.794366
0.0616087	0.0388768	0.0120444	0.0210497	0.00557006	-0.00868761	0.00587228	0.00203684	0.00834654	0.000521233		0	0	0.268667	0.0423321	0.75286	0.948656	0.782624	0.504343	0.367192	0.847887
0.082609	0.0636557	-0.0168217	0.0198124	-0.00905293	-0.00868761	0.023632	0.00867613	-0.00236199	-0.0188789		0	0	0.736308	0	1	1	1	1	0.783199	1
-0.0592563	-0.0652796	0.0428803	0.0179596	0.027369	0.011052	0.00681327	-0.00681355	0.00388476	0.00640792		1	0.7548	0	0.623868	0	0	0.683614	0.217906	0.578717	0
-0.0564911	-0.0604342	0.0406241	0.0171301	0.0196026	0.012149	0.0159787	0.00255417	-0.0030872	0.00621164		1	0.7548	0.345512	0.589975	0.24714	0	0.998768	0.627979	0.968261	0.152113
-0.0734537	-0.149538	0.0404014	0.0127607	0.0232362	0.0114229	-0.0337192	-0.00173843	0.0115554	0.00633729		1	1	0.505376	0.179419	0.24714	0	0.203863	0	0.520424	0.0985916
0.0579202	0.0386911	0.0120444	0.020503	0.0156185	-0.00839231	0.00205501	-0.00571859	0.00802508	0.000841289		0	0	0.343131	0.803526	0.472921	0.716045	0.488746	0.406916	0.315303	0.547418
0.0813273	0.0397276	-0.0168217	0.0202201	0.00571179	-0.00868761	0.00587228	0.00442049	0.00795425	0.000521233		0	0	0.859484	0.788049	0.637681	0.716045	0.666256	0.708826	0.58382	0.648826
0.0846591	0.0417747	-0.00951287	0.0137408	0.00557006	-0.00868761	0.00587228	0.00203684	0.00824412	0.000521233		0	0	1	0.483212	0.666667	0.948656	0.662162	0.501448	0.556938	0.648826
-0.0905825	-0.0627242	-0.047297	0.017413	0.027369	0.0114229	0.00205501	-0.00681355	-0.00159	0.00684902		1	0.7548	0.67825	0.90412	0.16476	0	0.628748	0.281962	0.689134	0.0835681
0.0826696	0.0368556	0.0120263	-0.0364834	0.0142565	-0.00839231	0.000591457	-0.00763532	0.00795425	0.000841289		0	0	0.972194	1	0.485507	0.716045	0.611478	0.474788	0.536299	0.48216
0.0569167	0.0354153	0.0127367	0.0202201	0.00785207	-0.00868761	0.00814528	0.00323173	0.00834654	0.00342263		0	0	0	0.463892	0	1	0.832117	0.723146	0	0
0.0569167	0.0380349	0.0120444	0.0202201	0.00785207	-0.00868761	0.0159787	0.00323173	0.00334885	0.000203913		0	0.00142339	0.425937	0.0560207	0.468794	0.970238	1	0.945688	0.627342	0.469205
0.0794202	0.0525629	-0.0159348	0.0206325	-0.00924246	-0.00913164	0.0235285	0.00867613	-0.0194957	-0.0196674		0	0.00384314	0.628302	0	1	0.919643	0.953383	1	0.999046	1
-0.0755056	-0.0427612	0.0428803	0.0179596	0.027369	0.0114229	0.00681327	-0.00681355	0.000287889	0.00684902		1	0.436553	0.067856	0.5142	0.449554	0	0.779037	0	0.619782	0.336624
-0.0747125	-0.0629321	0.0406241	0.017552	-0.0348124	0.0114229	0.019127	-0.0128278	-0.00340865	0.00159615		1	0.436553	0.245748	0.430232	0.982168	0	0.836316	0.0816521	0.982038	0.87024
-0.0722848	-0.168273	0.0404014	0.0123531	-0.041548	0.0114229	-0.0317478	-0.00775273	0.00417089	0.00246484		1	1	0.468836	0.223274	0.982168	0	0	0.067569	0.749475	0.400094
0.0575207	0.0361076	0.0120444	0.0202201	0.00863201	-0.00868761	0.0114737	0.00251074	0.00802508	0.00373995		0	0	0.412156	0.86808	0.306116	1	0.870385	0.556278	0.415708	0.26861
0.0804851	0.0391376	-0.0168217	0.0202201	0.00263264	-0.00868761	0.0105327	0.00381649	-0.00297331	0.000521233		0	0	0.713884	0.698396	0.660723	1	0.873939	0.6016	0.660361	0.623413
0.0826988	0.0446404	-0.00951287	0.0119569	-0.0146182	-0.00868761	-0.00218155	0.00564192	-0.00268344	0.000521233		0	0.00142339	1	0.427045	0.816987	0.970238	0.651128	0.671086	0.791954	0.6231
-0.0843429	-0.0472215	0.0154965	0.0170053	0.000860465	0.0114229	-0.00218155	-0.00940239	-0.00180903	0.00159615		1	0.436553	0.540396	0.768305	0.80463	0	0.538451	0.0497404	0.783765	0.535653
0.0812235	0.037166	-0.027673	-0.0636708	0.00544016	-0.00839231	0.00175628	-0.0102242	-0.00297331	0.000841289		0	0	0.924661	1	0.647114	1	0.733476	0.469676	0.662947	0.512694
0.0569167	0.0354153	0.0127367	0.0202201	0.00785207	-0.00868761	0.00814528	0.00323173	0.00834654	0.00342263		0	0	0	0.463892	0	1	0.832117	0.723146	0.00940582	0
0.0569167	0.0380349	0.0120444	0.0202201	0.00785207	-0.00868761	0.0159787	0.00323173	0.00334885	0.000203913		0	0.00142339	0.425937	0.0560207	0.468794	0.970238	1	0.945688	0.630479	0.469205
0.0794202	0.0525629	-0.0159348	0.0206325	-0.00924246	-0.00913164	0.0235285	0.00867613	-0.0194957	-0.0196674		0	0.00384314	0.628302	0	1	0.919643	0.953383	1	1	1
-0.0755056	-0.0427612	0.0428803	0.0179596	0.027369	0.0114229	0.00681327	-0.00681355	0.000287889	0.00684902		1	0.436553	0.067856	0.5142	0.449554	0	0.779037	0	0.623282	0.336624
-0.0747125	-0.0629321	0.0406241	0.017552	-0.0348124	0.0114229	0.019127	-0.0128278	-0.00340865	0.00159615		1	0.436553	0.245748	0.430232	0.982168	0	0.836316	0.0816521	0.983803	0.87024
-0.0722848	-0.173869	0.0404014	0.0123531	-0.041548	0.011052	-0.0317478	-0.00775273	0.00487281	0.00260848		1	1	0.468836	0.223274	0.982168	0	0	0.067569	0.751092	0.400094
0.0575207	0.0361076	0.0120444	0.0202201	0.00863201	-0.00868761	0.0114737	0.00251074	0.00802508	0.00373995		0	0	0.412156	0.86808	0.306116	1	0.870385	0.556278	0.421056	0.26861
0.0804851	0.0391376	-0.0168217	0.0202201	0.00263264	-0.00868761	0.0105327	0.00381649	-0.00297331	0.000521233		0	0	0.713884	0.698396	0.660723	1	0.873939	0.6016	0.664403	0.623413
0.0826988	0.044356	-0.00951287	0.0119569	-0.0146182	-0.00868761	-0.00218155	0.00564192	-0.00268344	0.000521233		0	0.00142339	1	0.427045	0.816987	0.970238	0.651128	0.671086	0.793857	0.6231
-0.0843429	-0.0472215	0.0154965	0.0170053	0.000860465	0.0114229	-0.00218155	-0.00940239	-0.00180903	0.00159615		1	0.436553	0.540396	0.768305	0.80463	0	0.538451	0.0497404	0.786059	0.535653
0.0812235	0.037166	-0.027673	-0.0636708	0.00544016	-0.00839231	0.00175628	-0.0102242	-0.00297331	0.000841289		0	0	0.924661	1	0.647114	1	0.733476	0.469676	0.666344	0.512694
0.0573162	0.0375812	0.0127367	0.0196735	0.0117112	-0.00868761	0.00205501	0.00323173	0.00831496	0.00373995		0	0	0	0.608995	0	1	0.609768	0.91852	0.572813	0.322785
0.058741	0.037808	0.0120444	0.0210497	0.0117594	-0.00839231	0.0159787	-0.00571859	-0.00437838	0.00190439		0	0	0.245349	0	0.175926	1	0.900905	0.449732	0.954119	0.443038
0.0821481	0.0525629	-0.0159348	0.0206325	-0.00924246	-0.00913164	0.0235285	0.00867613	-0.0194957	-0.0196674		0	0.00678732	0.813093	0.0144565	1	0.958904	1	1	1	1
-0.0571594	-0.0593257	0.0428803	0.017413	0.027369	0.0114229	0.00205501	-0.00681355	-0.00151916	0.00684902		1	0.809955	0.00280559	0.561469	0.0648148	0	0.509508	0.467308	0.725255	0
-0.0575875	-0.0795611	0.0406241	0.0167224	-0.0385019	0.012149	0.00257671	0.00765219	-0.00218741	0.00127609		1	0.809955	0.443593	0.526971	0.898148	0	0.654805	0.816617	0.901589	0.56962
-0.107805	-0.174558	-0.0471435	0.0123531	-0.041548	0.011052	-0.0317478	-0.00775273	0.00950397	0.00194319		1	1	0.580152	0.102497	0.898148	0	0	0	0.072678	0.449367
0.0560746	0.0379891	0.0120444	0.0202201	0.0117112	-0.00868761	0.00681327	0.00262772	-0.00290247	0.00373995		0	0	0.270676	0.869238	0.080247	1	0.673394	0.611853	0.750729	0.255274
0.0798811	0.0397276	-0.0168217	0.0202201	0.00571179	-0.00868761	0.00587228	0.00442049	-0.00297331	0.000521233		0	0	0.891415	0.864501	0.632716	1	0.754858	0.911712	0.824801	0.630802
0.083213	0.0395095	-0.00951287	0.0131942	0.00584148	-0.00839231	0.00111402	-0.00830744	-0.00297331	0.000841289		0	0	1	0.475329	0.691358	1	0.633635	0.483244	0.675599	0.630802
-0.0940724	-0.0629156	-0.047297	0.017413	0.0147366	0.0114229	0.00111402	-0.00940239	0.00579448	0.00684902		1	0.809955	0.615217	0.844163	0.62037	0	0.388104	0.427975	0.566507	0.339662
0.0812235	0.0370738	-0.027673	-0.0595334	0.00562087	-0.00868761	-0.000349539	0.00476096	-0.00297331	0.000521233		0	0	0.888578	1	0.506173	1	0.612498	0.608696	0.704409	0.464135
0.0573162	0.0375812	0.0127367	0.0196735	0.0117112	-0.00868761	0.00205501	0.00323173	0.00831496	0.00373995		0	0	0	0.608995	0	1	0.609768	0.91852	0.340835	0.322785
0.0592019	0.037808	0.0120444	0.0210497	0.0117594	-0.00839231	0.0159787	-0.00571859	-0.00258102	0.00190439		0	0	0.245349	0	0.175926	1	0.900905	0.449732	0.85666	0.443038
0.0821481	0.0516315	-0.0168217	0.0206325	-0.00924246	-0.00845901	0.023632	0.00867613	-0.00444922	-0.0196674		0	0.00678732	0.813093	0.0144565	1	0.958904	1	1	0.923063	1
-0.0571594	-0.0593257	0.0428803	0.017413	0.027369	0.0114229	0.00205501	-0.00681355	-0.00151916	0.00684902		1	0.809955	0.00280559	0.561469	0.0648148	0	0.509508	0.467308	0.667291	0
-0.0582557	-0.0795611	0.0406241	0.0167224	-0.0385019	0.012149	0.00257671	0.00765219	-0.00180903	0.00127609		1	0.809955	0.443593	0.526971	0.898148	0	0.654805	0.816617	0.841352	0.56962
-0.107805	-0.168962	-0.0471435	0.0123531	-0.041548	0.0114229	-0.0317478	-0.00775273	0.0114845	0.00179954		1	1	0.580152	0.102497	0.898148	0	0	0	0	0.449367
0.0575207	0.0382734	0.0120444	0.0202201	0.0117112	-0.00868761	0.00681327	0.00262772	0.00302739	0.00373995		0	0	0.270676	0.869238	0.080247	1	0.673394	0.611853	0.621596	0.255274
0.0798811	0.0397276	-0.0168217	0.0202201	0.00571179	-0.00868761	0.00587228	0.00442049	-0.00297331	0.000521233		0	0	0.891415	0.864501	0.632716	1	0.754858	0.911712	0.70175	0.630802
0.0846591	0.0395095	-0.00951287	0.0131942	0.00584148	-0.00839231	0.00111402	-0.00830744	0.00795425	0.000841289		0	0	1	0.475329	0.691358	1	0.633635	0.483244	0.593241	0.630802
-0.0940724	-0.0629156	-0.047297	0.017413	0.0147366	0.0114229	0.00111402	-0.00940239	0.00579448	0.00684902		1	0.809955	0.615217	0.844163	0.62037	0	0.388104	0.427975	0.502881	0.339662
0.0826696	0.0370738	-0.027673	-0.0595334	0.00562087	-0.00868761	-0.000349539	0.00476096	0.00795425	0.000521233		0	0	0.888578	1	0.506173	1	0.612498	0.608696	0.604867	0.464135
0.0573162	0.0381585	0.0127367	0.0196735	0.0117112	-0.00868761	0.00205501	0.00323173	0.00831496	0.000521233		0	0	0	0.461524	0	1	0.456313	0.961808	0.475667	0.453552
0.0582268	0.0391467	0.0120444	0.0202201	0.00785207	-0.00868761	0.0159787	0.00251074	-0.00501988	0.000203913		0	0	0.276451	0.0165461	0.32	1	0.981664	0.545668	0.976836	0.628415
0.0821481	0.06254	-0.0159348	0.0198124	-0.00905293	-0.00936023	0.0235285	0.00867613	-0.0279698	-0.0188789		0	0	0.818786	0	1	1	1	1	1	1
-0.0571594	-0.0593257	0.0428803	0.0179596	0.027369	0.0114229	0.00681327	-0.00681355	-0.00180903	0.00684902		1	0.85697	0.121612	0.310034	0.3	0	0.706215	0.47297	0.847792	0
-0.0576766	-0.0781628	0.0406241	0.0167224	-0.0362702	0.012149	0.00257671	0.00765219	-0.00148758	0.00633575		1	0.85697	0.504837	0.27935	0.98	0	0.755638	0.75479	0.871692	0.371585
-0.107805	-0.168279	-0.0471435	0.0123531	-0.041548	0.0114229	-0.0317478	-0.00775273	0.0114845	0.00633729		1	1	0.645582	0.0342993	0.98	0	0	0	0.0982089	0.196721
0.056474	0.0379891	0.0120444	0.0202201	0.0117112	-0.00868761	0.00681327	0.00262772	-0.00290247	0.00373995		0	0	0.331377	0.736543	0.206667	1	0.714731	0.660149	0.766765	0.360656
0.0798811	0.0397276	-0.0168217	0.0202201	0.00571179	-0.00868761	0.00587228	0.00442049	-0.00297331	0.000521233		0	0	0.863998	0.745025	0.66	1	0.737317	0.905533	0.782453	0.608379
0.083213	0.0397276	-0.00951287	0.0137408	0.00571179	-0.00868761	0.00587228	0.00274313	-0.00268344	0.000521233		0	0	1	0.410245	0.766667	1	0.660555	0.515223	0.691682	0.608379
-0.0940724	-0.0629156	-0.047297	0.017413	0.0147366	0.0114229	0.00111402	-0.00940239	0.00550461	0.00684902		1	0.85697	0.730042	0.674038	0.753333	0	0.487284	0.409253	0.605898	0.189435
0.0812235	0.0374341	-0.027673	-0.0595334	0.00531047	-0.00868761	-0.000349539	0.00476096	-0.00297331	0.00190165		0	0	0.930173	1	0.596667	1	0.649972	0.622539	0.711699	0.441712
0.0573162	0.0381585	0.0127367	0.0196735	0.0117112	-0.00868761	0.00205501	0.00323173	0.00802508	0.000521233		0	0	0	0.461524	0	1	0.456313	0.961808	0.419875	0.453552
0.0586877	0.0382154	0.0120444	0.0202201	0.00785207	-0.00868761	0.0159787	0.00251074	-0.00258102	0.000203913		0	0	0.276451	0.0165461	0.32	1	0.981664	0.545668	0.877818	0.628415
0.0821481	0.0616087	-0.0168217	0.0198124	-0.00905293	-0.00868761	0.023632	0.00867613	-0.00444922	-0.0188789		0	0	0.818786	0	1	1	1	1	0.904144	1
-0.0571594	-0.0593257	0.0428803	0.0179596	0.027369	0.0114229	0.00681327	-0.00681355	-0.00151916	0.00684902		1	0.85697	0.121612	0.310034	0.3	0	0.706215	0.47297	0.712802	0
-0.0576766	-0.0781628	0.0406241	0.0167224	-0.0362702	0.012149	0.00257671	0.00765219	-0.00148758	0.00633575		1	0.85697	0.504837	0.27935	0.98	0	0.755638	0.75479	0.739876	0.371585
-0.107805	-0.173875	-0.0471435	0.0123531	-0.041548	0.011052	-0.0317478	-0.00775273	0.00950397	0.00589619		1	1	0.645582	0.0342993	0.98	0	0	0	0	0.196721
0.056474	0.0379891	0.0120444	0.0202201	0.0117112	-0.00868761	0.00681327	0.00262772	-0.0026126	0.00373995		0	0	0.331377	0.736543	0.206667	1	0.714731	0.660149	0.670165	0.360656
0.0798811	0.0397276	-0.0168217	0.0202201	0.00571179	-0.00868761	0.00587228	0.00442049	-0.00297331	0.000521233		0	0	0.863998	0.745025	0.66	1	0.737317	0.905533	0.687965	0.608379
0.0846591	0.0397276	-0.00951287	0.0137408	0.00571179	-0.00868761	0.00587228	0.00274313	0.00795425	0.000521233		0	0	1	0.410245	0.766667	1	0.660555	0.515223	0.593987	0.608379
-0.0940724	-0.0629156	-0.047297	0.017413	0.0147366	0.0114229	0.00111402	-0.00940239	0.00579448	0.00684902		1	0.85697	0.730042	0.674038	0.753333	0	0.487284	0.409253	0.484226	0.189435
0.0826696	0.0374341	-0.027673	-0.0595334	0.00531047	-0.00868761	-0.000349539	0.00476096	0.00266668	0.00190165		0	0	0.930173	1	0.596667	1	0.649972	0.622539	0.609086	0.441712
0.0565101	0.0384689	0.0127367	0.0196735	0.00571179	-0.00868761	0.00111402	0.00442049	-0.00290247	0.000521233		0	0	0.0805263	0.382238	0.554252	1	0.39326	0.933714	0.731615	0.767802
0.0610945	0.0385711	0.0120444	0.0202201	0.00263264	-0.00868761	0.0105327	0.00369951	0.00831496	0.000521233		0	0.000889295	0.412579	0.0071839	0.656892	0.998462	0.837743	0.551142	0.575012	0.820433
0.082609	0.0613696	-0.0168217	0.0198124	-0.00905293	-0.00868761	0.023632	0.00867613	-0.00236199	-0.0188789		0	0.00177857	0.918824	0	1	0.996923	0.969273	1	0.786976	1
-0.0571594	-0.0669816	0.0428803	0.0179596	0.0235099	0.0114229	0.0114737	-0.00173843	-0.00148758	0.00614408		1	0.903513	0	0.565518	0	0	0.865583	0.288935	0.843107	0
-0.0564911	-0.0784717	0.0393693	0.0171301	0.0196026	0.0149889	0.0158752	-0.000150369	-0.0158314	0.00569991		1	0.903513	0.340047	0.523849	0.346041	0	1	0.602505	1	0.182663
-0.0729888	-0.154337	0.0404014	0.0127607	0.0232362	0.011052	-0.0337192	-0.00173843	0.00957481	0.00589619		1	1	0.418317	0.134623	0.346041	0	0	0	0.119159	0.126935
0.056474	0.0388507	0.0120444	0.0202201	0.0117112	-0.00868761	0.00681327	0.00262772	-0.00290247	0.000521233		0	0	0.436931	0.765808	0.403714	1	0.698862	0.591264	0.716578	0.529412
0.0798811	0.0397276	-0.0168217	0.0202201	0.00571179	-0.00868761	0.00606468	0.00442049	-0.00297331	0.000521233		0	0	0.938845	0.734343	0.633431	1	0.787511	0.845406	0.83953	0.650155
0.0846591	0.040012	-0.00951287	0.0131942	0.00571179	-0.00868761	0.00111402	0.00274313	0.00824412	0.000521233		0	0.000889295	1	0.424076	0.667644	0.998462	0.602339	0.517047	0.493716	0.649123
-0.0710582	-0.0689938	-0.000842576	0.017413	0.027369	0.0114229	0.00205501	-0.00173843	-0.00187987	0.00633729		1	0.903513	0.560774	0.859598	0.230694	0	0.621861	0.297147	0.654089	0.103199
0.0812235	0.0370738	0.0120263	-0.0365576	0.0103492	-0.00868761	0.00269728	0.00345522	-0.00297331	0.000521233		0	0	0.948641	1	0.483871	1	0.677643	0.562716	0.675978	0.482972
0.0579562	0.0384689	0.0127367	0.0196735	0.00571179	-0.00868761	0.00111402	0.00442049	0.00802508	0.000521233		0	0	0.0805263	0.382238	0.554252	1	0.39326	0.933714	0.596158	0.767802
0.0610945	0.0385711	0.0120444	0.0202201	0.00263264	-0.00868761	0.0105327	0.00369951	0.00831496	0.000521233		0	0.000889295	0.412579	0.0071839	0.656892	0.998462	0.837743	0.551142	0.513279	0.820433
0.082609	0.0613696	-0.0168217	0.0198124	-0.00905293	-0.00868761	0.023632	0.00867613	-0.00236199	-0.0188789		0	0.00177857	0.918824	0	1	0.996923	0.969273	1	0.751626	1
-0.0571594	-0.0669816	0.0428803	0.0179596	0.0235099	0.0114229	0.0114737	-0.00173843	-0.00148758	0.00614408		1	0.903513	0	0.565518	0	0	0.865583	0.288935	0.721966	0
-0.0564911	-0.0794031	0.0406241	0.0171301	0.0196026	0.012149	0.0159787	-0.000150369	-0.00215583	0.00569991		1	0.903513	0.340047	0.523849	0.346041	0	1	0.602505	0.921318	0.182663
-0.0729888	-0.154337	0.0404014	0.0127607	0.0232362	0.011052	-0.0337192	-0.00173843	0.00957481	0.00589619		1	1	0.418317	0.134623	0.346041	0	0	0	0	0.126935
0.0579202	0.0388507	0.0120444	0.0202201	0.0117112	-0.00868761	0.00681327	0.00262772	0.00273752	0.000521233		0	0	0.436931	0.765808	0.403714	1	0.698862	0.591264	0.610468	0.529412
0.0798811	0.0397276	-0.0168217	0.0202201	0.00571179	-0.00868761	0.00606468	0.00442049	-0.00297331	0.000521233		0	0	0.938845	0.734343	0.633431	1	0.787511	0.845406	0.756367	0.650155
0.0846591	0.040012	-0.00951287	0.0131942	0.00571179	-0.00868761	0.00111402	0.00274313	0.00824412	0.000521233		0	0.000889295	1	0.424076	0.667644	0.998462	0.602339	0.517047	0.421635	0.649123
-0.0731551	-0.0689938	-0.000842576	0.017413	0.027369	0.0114229	0.00205501	-0.00173843	0.00550461	0.00633729		1	0.903513	0.560774	0.859598	0.230694	0	0.621861	0.297147	0.547761	0.103199
0.0826696	0.0373582	0.0120263	-0.0365576	0.0103492	-0.00868761	0.00269728	0.00345522	0.00795425	0.000521233		0	0	0.948641	1	0.483871	1	0.677643	0.562716	0.584058	0.482972
0.0573162	0.0375812	0.0127367	0.0164476	0.0117112	-0.00868761	-0.0219744	0.00323173	0.00800301	0.00373995		0	0	0	0.398845	0	1	0.347865	1	0.188749	0.307992
0.0592019	0.0379763	0.0120444	0.0202201	0.00785207	-0.00868761	0.0159787	0.00251074	-0.00229115	0.000203913		0	0.000918698	0.328895	0.0337589	0.303371	0.956522	0.99701	0.555983	0.740694	0.516569
0.0821481	0.0636557	-0.0168217	0.0198124	-0.00905293	-0.00868761	0.023632	0.00867613	-0.00415934	-0.0188789		0	0.000918698	0.669894	0	1	0.956522	1	0.975411	0.960005	1
-0.0562836	-0.0591075	0.0428803	0.0171301	0.0234617	0.012149	0.00700567	0.00463799	-0.00180903	0.00652896		1	0.768948	0.0992637	0.46113	0.289326	0	0.794222	0.73236	0.806319	0
-0.0570083	-0.0792198	0.0393693	0.0167224	-0.0296912	0.0149889	0.0190235	0.00765219	-0.00643411	0.00127609		1	0.768948	0.420302	0.405992	0.985955	0	0.840654	0.965466	1	0.483431
-0.105708	-0.173875	-0.0471435	0.0123531	-0.041548	0.011052	-0.0317478	-0.00775273	0.00480197	0.00589619		1	1	0.700533	0.0361838	0.985955	0	0	0	0.670731	0.270955
0.0569167	0.0382734	0.0120444	0.0202201	0.0117112	-0.00868761	0.00681327	0.00323173	0.00802508	0.00373995		0	0	0.376641	0.752401	0.197566	1	0.713033	0.762781	0.578587	0.274854
0.0798811	0.0397276	-0.0168217	0.0202201	0.00571179	-0.00868761	0.00587228	0.00442049	-0.00297331	0.000521233		0	0	0.834374	0.723637	0.661985	1	0.729506	0.980292	0.716251	0.597141
0.083213	0.0417747	-0.00951287	0.0137408	0.00571179	-0.00868761	0.00587228	0.00274313	-0.00268344	0.000521233		0	0.000918698	1	0.429726	0.763109	0.956522	0.66567	0.510465	0.790477	0.595841
-0.0919755	-0.0626974	-0.047297	0.0165834	0.0146069	0.012149	0.00111402	0.00362596	-0.00187987	0.00652896		1	0.768948	0.709195	0.804003	0.753745	0	0.544959	0.565942	0.825683	0.251462
0.0806195	0.0374341	0.0120263	-0.0365576	0.00531047	-0.00868761	0.00175628	0.00536497	-0.00297331	0.00190165		0	0	0.971632	1	0.594101	1	0.663292	0.70487	0.72775	0.429825
0.0573162	0.0375812	0.0127367	0.0164476	0.0117112	-0.00868761	-0.0219744	0.00323173	0.00800301	0.00373995		0	0	0	0.398845	0	1	0.347865	1	0	0.307992
0.0606481	0.0382607	0.0120444	0.0202201	0.00785207	-0.00868761	0.0159787	0.00251074	0.00863641	0.000203913		0	0.000918698	0.328895	0.0337589	0.303371	0.956522	0.99701	0.555983	0.559084	0.516569
0.082609	0.0636557	-0.0168217	0.0198124	-0.00905293	-0.00868761	0.023632	0.00867613	-0.00236199	-0.0188789		0	0.000918698	0.669894	0	1	0.956522	1	0.975411	0.86219	1
-0.0562836	-0.0591075	0.0428803	0.0171301	0.0234617	0.012149	0.00700567	0.00463799	-0.00180903	0.00652896		1	0.768948	0.0992637	0.46113	0.289326	0	0.794222	0.73236	0.739728	0
-0.0570083	-0.0792198	0.0406241	0.0167224	-0.0296912	0.012149	0.019127	0.00765219	-0.00340865	0.00127609		1	0.768948	0.420302	0.405992	0.985955	0	0.840654	0.965466	0.970046	0.483431
-0.107805	-0.168279	-0.0471435	0.0123531	-0.041548	0.0114229	-0.0317478	-0.00775273	0.0114845	0.00633729		1	1	0.700533	0.0361838	0.985955	0	0	0	0.549485	0.270955
0.0569167	0.0382734	0.0120444	0.0202201	0.0117112	-0.00868761	0.00681327	0.00323173	0.00802508	0.00373995		0	0	0.376641	0.752401	0.197566	1	0.713033	0.762781	0.432937	0.274854
0.0813273	0.0397276	-0.0168217	0.0202201	0.00571179	-0.00868761	0.00587228	0.00442049	0.00266668	0.000521233		0	0	0.834374	0.723637	0.661985	1	0.729506	0.980292	0.610745	0.597141
0.083213	0.042059	-0.00951287	0.0137408	0.00571179	-0.00868761	0.00587228	0.00274313	-0.00268344	0.000521233		0	0.000918698	1	0.429726	0.763109	0.956522	0.66567	0.510465	0.65692	0.595841
-0.0919755	-0.0626974	-0.047297	0.0165834	0.0146069	0.012149	0.00111402	0.00362596	-0.00187987	0.00652896		1	0.768948	0.709195	0.804003	0.753745	0	0.544959	0.565942	0.753086	0.251462
0.0820656	0.0377184	0.0120263	-0.0365576	0.00531047	-0.00868761	0.00175628	0.00536497	0.00266668	0.00190165		0	0	0.971632	1	0.594101	1	0.663292	0.70487	0.613422	0.429825
0.0582768	0.0485745	0.0127367	0.0192658	-0.0200954	-0.00868761	-0.00218155	0.00807809	0.00302739	-0.00747247		0	0	0.175457	0.541351	0.888889	1	0.401346	0.905961	0.634886	0.984293
0.0568307	0.0486767	0.0120444	0.0198124	-0.00905293	-0.00868761	0.023632	0.00807809	-0.00258102	-0.00429596		0	0	0.385344	0.0355023	0.925926	1	0.993318	0.859014	0.650454	0.989529
0.0816339	0.06254	-0.00862594	0.0125036	-0.00905293	-0.00936023	0.0235285	0.00867613	-0.0194957	-0.0188789		0	0	0.995595	0	1	1	1	1	0.998997	1
-0.0592563	-0.0563981	0.0428803	0.017413	0.027369	0.0114229	0.00205501	-0.00173843	0.00557545	0.00633729		1	0.942255	0	0.382479	0	0	0.591124	0	0.60117	0
-0.0564911	-0.0580661	0.0406241	0.0179596	0.027369	0.0114229	0.00681327	-0.00173843	-0.00247728	0.00633729		1	0.942255	0.258354	0.342759	0.0740739	0	0.749467	0.114662	0.953491	0.0104712
-0.0729888	-0.155133	0.0404014	0.0127607	0.0232362	0.011052	-0.0337192	-0.00173843	0.00957481	0.00589619		1	1	0.368618	0.177803	0.0740739	0	0	0.0400322	0	0.00523559
0.0588808	0.0391611	0.0120444	0.0202201	0.00571179	-0.00868761	0.00587228	0.00381649	0.00273752	0.000521233		0	0	0.431903	0.851952	0.604938	1	0.661929	0.588325	0.628837	0.657941
0.0804851	0.0397276	-0.0168217	0.0202201	0.00571179	-0.00868761	0.00587228	0.00381649	-0.00297331	0.000521233		0	0	0.90748	0.841459	0.654321	1	0.716938	0.673541	0.862458	0.664921
0.0841449	0.040012	-0.00951287	0.0129112	0.00571179	-0.00868761	0.00587228	0.00381649	0.00824412	0.000521233		0	0	1	0.73538	0.666667	1	0.664439	0.633015	0.549817	0.664921
-0.0592563	-0.0572697	0.0406241	0.017413	0.027369	0.0114229	0.00205501	-0.00173843	0.00557545	0.00633729		1	0.942255	0.463866	0.706636	0.0493824	0	0.446864	0.0515648	0.518221	0.00523559
0.0826696	0.03714	-0.027673	-0.061565	0.00575056	-0.00839231	-0.000349539	-0.0102242	0.00266668	0.000841289		0	0	0.889371	1	0.493827	1	0.622542	0.486612	0.639833	0.498255
0.0582768	0.0485745	0.0127367	0.0192658	-0.0200954	-0.00868761	-0.00218155	0.00807809	0.00273752	-0.00747247		0	0	0.175457	0.541351	0.888889	1	0.401346	0.905961	0.610474	0.984293
0.0568307	0.0486767	0.0120444	0.0198124	-0.00905293	-0.00868761	0.023632	0.00807809	-0.00229115	-0.00429596		0	0	0.385344	0.0355023	0.925926	1	0.993318	0.859014	0.653843	0.989529
0.0816339	0.06254	-0.00862594	0.0125036	-0.00905293	-0.00936023	0.0235285	0.00867613	-0.0279698	-0.0188789		0	0	0.995595	0	1	1	1	1	1	1
-0.0592563	-0.0563981	0.0428803	0.017413	0.027369	0.0114229	0.00205501	-0.00173843	0.000287889	0.00633729		1	0.942255	0	0.382479	0	0	0.591124	0	0.632191	0
-0.0564911	-0.0571347	0.0406241	0.0179596	0.027369	0.0114229	0.00681327	-0.00173843	-0.00340865	0.00633729		1	0.942255	0.258354	0.342759	0.0740739	0	0.749467	0.114662	0.977545	0.0104712
-0.0729888	-0.155133	0.0404014	0.0127607	0.0232362	0.011052	-0.0337192	-0.00173843	0.00957481	0.00589619		1	1	0.368618	0.177803	0.0740739	0	0	0.0400322	0.058876	0.00523559
0.0588808	0.0391611	0.0120444	0.0202201	0.00571179	-0.00868761	0.00587228	0.00381649	0.00273752	0.000521233		0	0	0.431903	0.851952	0.604938	1	0.661929	0.588325	0.63217	0.657941
0.0804851	0.0397276	-0.0168217	0.0202201	0.00571179	-0.00868761	0.00587228	0.00381649	-0.00297331	0.000521233		0	0	0.90748	0.841459	0.654321	1	0.716938	0.673541	0.862673	0.664921
0.0841449	0.040012	-0.00951287	0.0129112	0.00571179	-0.00868761	0.00587228	0.00381649	0.00824412	0.000521233		0	0	1	0.73538	0.666667	1	0.664439	0.633015	0.570906	0.664921
-0.0592563	-0.0572697	0.0406241	0.017413	0.027369	0.0114229	0.00205501	-0.00173843	0.00557545	0.00633729		1	0.942255	0.463866	0.706636	0.0493824	0	0.446864	0.0515648	0.556204	0.00523559
0.0812235	0.0368556	-0.027673	-0.061565	0.00575056	-0.00839231	-0.000349539	-0.0102242	-0.00297331	0.000841289		0	0	0.889371	1	0.493827	1	0.622542	0.486612	0.655488	0.498255
0.073095	-0.0839402	-0.0184882	0.0132492	-0.0430347	0.0126933	-0.026211	-0.0169889	-0.00299539	-0.0116678		0	0.682967	0.795662	0.248558	0.967195	0.000606431	0.282298	0.124417	0.776237	0.97076
0.0546193	-0.0566693	0.0152155	0.0168828	0.0256038	0.0126933	0.00205501	-0.00638491	0.00831496	0.00684902		0	0.628313	0.0323903	0	0.0271493	0.00758035	0.529992	0	0.506077	0.0292398
0.0546193	-0.0570273	0.0152155	0.0168828	0.0256038	0.0116596	0.00205501	-0.00638491	0.00831496	0.00684902		0	0.628724	0.0586951	0.0327807	0.0294118	0.02547	0.533772	0.12769	0.45098	0.0315789
0.058137	0.0295926	0.0120444	0.0210401	0.00816433	-0.00845901	0.0159787	0.00323173	-0.00408851	0.000267926		0	0.00575303	0.394578	0.990674	0.411765	1	1	0.936716	0.923978	0.594152
-0.108804	-0.0756357	-0.047297	0.0170053	-0.0386437	0.012149	-0.00218155	0.00446926	-0.00187987	-0.0473797		1	0.63345	0.798623	0.252183	0.967195	0	0.554834	0.502766	0.879751	1
-0.108804	-0.0758539	-0.047297	0.0170053	-0.0436231	0.0113067	-0.00218155	-0.0174176	-0.00176369	-0.0523299		1	0.643929	0.799624	0.253201	0.967195	0.00303213	0.541889	0.288017	0.842373	0.997661
-0.0689001	-0.17451	0.0356772	-0.0114588	-0.0351218	-0.0026528	-0.00516508	0.00613508	-0.0401196	0.00116217		1	1	0.308038	0.997215	1	0.271377	0.825312	0.739494	1	0.837427
-0.079461	-0.0443815	0.0428803	0.0141871	0.0232362	0.0114229	-0.0302575	-0.00681355	0.00584325	0.00684902		1	0.63345	0	0.0234686	0	0	0	0.121032	0.0915181	0
-0.0845616	0.0256048	0.0397091	0.0215704	0.00992956	-0.00724265	0.0159787	0.00428291	-0.00203965	0.000267926		1	0.00513664	0.400976	0.990155	0.386878	0.927229	0.971267	1	0.886788	0.57193
-0.0845616	0.0256048	0.0397091	0.0215704	0.00992956	-0.00724265	0.0159787	0.00428291	-0.00203965	0.000267926		1	0.00780769	0.402546	0.990399	0.386878	0.941783	0.995565	0.996253	0.899601	0.569591
0.0748559	-0.0608119	-0.0184882	0.0168828	0.015325	0.0126933	0.00111402	-0.00897376	-0.00297331	0.00159615		0	0.628313	0.808063	0.362642	0.653846	0.00758035	0.455708	0.209061	0.720689	0.666667
0.0748559	-0.0608119	-0.0184882	0.0168828	0.015325	0.0116596	0.00111402	-0.00897376	-0.00297331	0.00159615		0	0.628724	0.821768	0.345948	0.6546	0.02547	0.452653	0.180041	0.689863	0.666667
0.0807626	0.0248192	-0.0202912	-0.0356769	0.00512094	-0.00845901	0.0040329	0.005359	-0.00477067	0.000585246		0	0.00575303	0.876274	0.998618	0.792986	1	0.702537	0.600209	0.900072	0.80078
0.0546193	-0.0570273	0.0152155	0.0136569	0.0256038	0.0126933	-0.0219744	-0.00638491	0.00829288	0.00684902		0	0.628313	0.0500526	0.133524	0.0188537	0.00758035	0.354588	0.0829071	0.349525	0.0202729
0.0592019	0.0401318	0.0120444	0.0202201	0.00863201	-0.00868761	0.0106749	0.00262772	-0.0026126	0.00305427		0	0	0.425369	0.994843	0.275264	0.934809	0.833753	0.645572	0.772281	0.398441
0.0585979	0.0380847	0.0120444	0.0202201	0.00863201	-0.00868761	0.0114737	0.00323173	-0.0026126	0.00305427		0	0	0.437966	0.994528	0.276018	0.953305	0.843112	0.686886	0.758186	0.398441
-0.110901	-0.048166	-0.047297	0.0141871	0.0147366	0.0114229	-0.0229154	-0.00940239	0.00548254	0.00159615		1	0.63345	0.795015	0.349081	0.644796	0	0.365574	0.303938	0.604547	0.665887
-0.116493	0.0193945	-0.0564818	-0.0671558	0.00375258	-0.00724265	-0.001697	0.00701419	-0.00211049	0.000267926		1	0.00513664	0.883152	0.998679	0.784691	0.927229	0.783805	0.74742	0.92218	0.803119
-0.117369	0.0210704	-0.0491	-0.0369557	0.00375258	-0.00724265	0.00169566	0.00493037	-0.00211049	0.000267926		1	0.00760222	0.886711	0.998295	0.784691	0.942086	0.787589	0.674588	0.913991	0.801559
-0.0873268	0.0243553	0.0397091	0.0215704	0.0137887	-0.00724265	0.00681327	0.00428291	0.000693941	0.00380397		1	0.00513664	0.402358	0.994487	0.257919	0.927229	0.655611	0.705762	0.625969	0.380507
0.076302	-0.0606205	-0.0184882	0.0168828	0.0161372	0.0126933	0.00111402	-0.00897376	0.00795425	0.00159615		0	0.628313	0.80586	0.439457	0.493024	0.00758035	0.407131	0.193987	0.591156	0.504873
0.0812235	0.0373257	0.0120263	-0.0365576	0.00531047	-0.00868761	0.00175628	0.00464398	-0.00297331	0.000521233		0	0	0.987913	0.999583	0.626697	0.934809	0.693951	0.550565	0.828805	0.667251
0.0812235	0.0373257	0.0120263	-0.0365576	0.00531047	-0.00868761	0.00175628	0.00451716	-0.00297331	0.000521233		0	0	0.997074	0.99927	0.627074	0.953305	0.696473	0.535431	0.815528	0.666862
0.060987	0.0361343	0.00857498	-0.0164125	0.0113098	-0.00868761	0.0049739	0.0033284	0.00302739	0.00373995		0	0	0.42194	0.9968	0.207014	0.934809	0.671766	0.530282	0.62649	0.299415
-0.118037	0.0193945	-0.0167824	-0.0399684	0.00453253	-0.00724265	-0.000349539	0.00433232	-0.00176369	0.000585246		1	0.00513664	0.981522	0.999323	0.618024	0.927229	0.648145	0.607927	0.766672	0.662768
0.0812235	0.0367971	0.0120263	-0.0364834	0.00575056	-0.00839231	-0.000349539	-0.0102242	-0.00297331	0.000841289		0	0	1	1	0.514367	0.934809	0.623493	0.483638	0.72573	0.560234
0.0745411	-0.0839402	-0.0184882	0.0132492	-0.0430347	0.0126933	-0.026211	-0.0169889	0.00264461	-0.0116678		0	0.682967	0.795662	0.248558	0.967195	0.000606431	0.282298	0.124417	0.619412	0.97076
0.0546193	-0.0570273	0.0152155	0.0168828	0.0256038	0.0126933	0.00205501	-0.00638491	0.00802508	0.00684902		0	0.628313	0.0323903	0	0.0271493	0.00758035	0.529992	0	0.388657	0.0292398
0.0546193	-0.0570273	0.0152155	0.0168828	0.0256038	0.0116596	0.00205501	-0.00638491	0.00831496	0.00684902		0	0.628724	0.0586951	0.0327807	0.0294118	0.02547	0.533772	0.12769	0.316663	0.0315789
0.0585979	0.0295926	0.0120444	0.0210401	0.00816433	-0.00845901	0.0159787	0.00323173	-0.00258102	0.000267926		0	0.00575303	0.394578	0.990674	0.411765	1	1	0.936716	0.881538	0.594152
-0.108804	-0.0759937	-0.047297	0.0170053	-0.0386437	0.012149	-0.00218155	0.00446926	-0.00187987	-0.0473797		1	0.63345	0.798623	0.252183	0.967195	0	0.554834	0.502766	0.800154	1
-0.108804	-0.0762119	-0.047297	0.0170053	-0.0436231	0.0113067	-0.00218155	-0.0174176	-0.00176369	-0.0523299		1	0.643929	0.799624	0.253201	0.967195	0.00303213	0.541889	0.288017	0.748144	0.997661
-0.0689001	-0.17451	0.036932	-0.0114588	-0.0351218	-0.00198018	-0.0050616	0.00613508	-0.0150988	0.00116217		1	1	0.308038	0.997215	1	0.271377	0.825312	0.739494	0.96857	0.837427
-0.079461	-0.039052	0.0428803	0.0141871	0.0232362	0.011052	-0.0302575	-0.00681355	0.00386269	0.00640792		1	0.63345	0	0.0234686	0	0	0	0.121032	0	0
-0.0852299	0.0256048	0.0397091	0.0215704	0.00992956	-0.00724265	0.0159787	0.00428291	-0.0013714	0.000267926		1	0.00513664	0.400976	0.990155	0.386878	0.927229	0.971267	1	0.872967	0.57193
-0.0845616	0.0256048	0.0397091	0.0215704	0.00992956	-0.00724265	0.0159787	0.00428291	-0.00203965	0.000267926		1	0.00780769	0.402546	0.990399	0.386878	0.941783	0.995565	0.996253	0.889903	0.569591
0.076302	-0.0608119	-0.0184882	0.0168828	0.015325	0.0126933	0.00111402	-0.00897376	0.00795425	0.00159615		0	0.628313	0.808063	0.362642	0.653846	0.00758035	0.455708	0.209061	0.602741	0.666667
0.076302	-0.0608119	-0.0184882	0.0168828	0.015325	0.0116596	0.00111402	-0.00897376	0.00795425	0.00159615		0	0.628724	0.821768	0.345948	0.6546	0.02547	0.452653	0.180041	0.561406	0.666667
0.0812235	0.0248192	-0.0202912	-0.0356769	0.00512094	-0.00845901	0.0040329	0.005359	-0.00297331	0.000585246		0	0.00575303	0.876274	0.998618	0.792986	1	0.702537	0.600209	0.823174	0.80078
0.0546193	-0.0570273	0.0152155	0.0136569	0.0256038	0.0126933	-0.0219744	-0.00638491	0.00829288	0.00684902		0	0.628313	0.0500526	0.133524	0.0188537	0.00758035	0.354588	0.0829071	0.235106	0.0202729
0.0592019	0.0401318	0.0120444	0.0202201	0.00863201	-0.00868761	0.0106749	0.00262772	-0.00290247	0.00305427		0	0	0.425369	0.994843	0.275264	0.934809	0.833753	0.645572	0.714387	0.398441
0.0585979	0.0380847	0.0120444	0.0202201	0.00863201	-0.00868761	0.0114737	0.00323173	-0.00290247	0.00305427		0	0	0.437966	0.994528	0.276018	0.953305	0.843112	0.686886	0.696035	0.398441
-0.110901	-0.048166	-0.047297	0.0141871	0.0147366	0.0114229	-0.0229154	-0.00940239	0.00548254	0.00159615		1	0.63345	0.795015	0.349081	0.644796	0	0.365574	0.303938	0.516099	0.665887
-0.117161	0.0193945	-0.0564818	-0.0671558	0.00375258	-0.00724265	-0.001697	0.00701419	-0.00144224	0.000267926		1	0.00513664	0.883152	0.998679	0.784691	0.927229	0.783805	0.74742	0.880564	0.803119
-0.118037	0.0210704	-0.0491	-0.0369557	0.00375258	-0.00724265	0.00169566	0.00493037	-0.00144224	0.000267926		1	0.00760222	0.886711	0.998295	0.784691	0.942086	0.787589	0.674588	0.868873	0.801559
-0.0873268	0.0243553	0.0397091	0.0215704	0.0137887	-0.00724265	0.00681327	0.00428291	0.00569163	0.00380397		1	0.00513664	0.402358	0.994487	0.257919	0.927229	0.655611	0.705762	0.587624	0.380507
0.076302	-0.0606205	-0.0184882	0.0168828	0.0161372	0.0126933	0.00111402	-0.00897376	0.00795425	0.00159615		0	0.628313	0.80586	0.439457	0.493024	0.00758035	0.407131	0.193987	0.478838	0.504873
0.0812235	0.0373257	0.0120263	-0.0365576	0.00531047	-0.00868761	0.00175628	0.00464398	-0.00297331	0.000521233		0	0	0.987913	0.999583	0.626697	0.934809	0.693951	0.550565	0.755217	0.667251
0.0812235	0.0373257	0.0120263	-0.0365576	0.00531047	-0.00868761	0.00175628	0.00451716	-0.00297331	0.000521233		0	0	0.997074	0.99927	0.627074	0.953305	0.696473	0.535431	0.737372	0.666862
0.060987	0.0361343	0.00857498	-0.0164125	0.0113098	-0.00868761	0.0049739	0.0033284	0.00802508	0.00373995		0	0	0.42194	0.9968	0.207014	0.934809	0.671766	0.530282	0.558288	0.299415
-0.118037	0.0193945	-0.0167824	-0.0399684	0.00453253	-0.00724265	-0.000349539	0.00433232	-0.00176369	0.000585246		1	0.00513664	0.981522	0.999323	0.618024	0.927229	0.648145	0.607927	0.71329	0.662768
0.0812235	0.0367971	0.0120263	-0.0364834	0.00575056	-0.00839231	-0.000349539	-0.0102242	-0.00297331	0.000841289		0	0	1	1	0.514367	0.934809	0.623493	0.483638	0.648601	0.560234
0.0704853	-0.189322	-0.0183347	0.0118229	-0.0409596	0.0126933	-0.0317478	-0.00732409	0.00300661	0.00179954		0	1	0.663431	0.251656	0.985479	0.00160371	0.17102	0	0.866349	0.779146
0.043413	-0.105765	0.0152155	0.0168828	0.0256038	0.0126933	0.00205501	-0.0013098	0.00802508	0.00684902		0	0.881411	0.0659278	0	0.0609874	0.00552388	0.588587	0.135956	0.580432	0.0533662
0.043413	-0.107755	0.0152155	0.0168828	0.0256038	0.0116596	0.00205501	-0.0013098	0.00302739	0.00633729		0	0.888212	0.0934257	0.0276366	0.0667958	0.0324305	0.588752	0.25279	0.627381	0.0566502
0.058137	0.0295926	0.0120444	0.0210401	0.00816433	-0.00845901	0.0159787	0.00323173	-0.00408851	0.000267926		0	0.01431	0.339992	0.994478	0.263311	0.982003	0.980587	0.95435	0.912207	0.536125
-0.0918864	-0.0954806	-0.047297	0.0161758	-0.0385019	0.012149	-0.00218155	0.00250536	-0.00254812	0.00147949		1	0.885803	0.670582	0.25615	0.985479	0	0.598816	0.548267	0.885805	0.835796
-0.0918864	-0.0879192	-0.047297	0.0170053	-0.0436231	0.0113067	-0.00218155	-0.00890435	-0.00243194	0.00179954		1	0.908898	0.679143	0.239227	0.985479	0.00641483	0.55858	0.347222	0.918665	0.829228
-0.0586581	-0.080026	0.0358999	-0.0251968	-0.0351218	0.00863876	-0.00170338	0.0106718	-0.0192279	-0.0411004		1	0.685463	0.264433	0.998519	1	0.137919	0.797011	0.869336	1	1
-0.0632117	-0.0680118	0.0428803	0.0141871	0.0232362	0.0114229	-0.0302575	-0.00173843	0.00584325	0.00633729		1	0.885803	0	0.0136957	0	0	0	0.23588	0.0068031	0
-0.0852299	0.0243426	0.0397091	0.0215704	0.00992956	-0.00724265	0.0159787	0.00428291	-0.0013714	0.000267926		1	0.00439218	0.348851	0.993644	0.2091	0.994476	0.942299	1	0.761269	0.500821
-0.0852299	0.0258438	0.0397091	0.0215704	0.00992956	-0.00724265	0.0159787	0.00428291	-0.00108153	0.000267926		1	0.00779258	0.357567	0.994534	0.21394	0.9902	1	0.998111	0.849981	0.502463
0.0636495	-0.109907	-0.0184882	0.0168828	0.015325	0.0126933	0.00111402	-0.00389864	-0.00297331	0.00159615		0	0.881411	0.709327	0.41091	0.677315	0.00552388	0.452808	0.228074	0.777529	0.556103
0.0636495	-0.111183	-0.0184882	0.0168828	0.015325	0.0116596	0.00111402	-0.00389864	-0.00297331	0.00179954		0	0.887929	0.729078	0.376683	0.679251	0.0327869	0.43945	0.200004	0.804132	0.555008
0.0807626	0.0231433	-0.027673	-0.0637712	0.00512094	-0.00845901	-0.000349539	0.00476096	-0.00477067	0.000585246		0	0.01431	0.895607	0.999342	0.749597	0.982003	0.649539	0.607895	0.926185	0.771757
0.043413	-0.106123	0.0152155	0.0168828	0.0256038	0.0126933	0.00205501	-0.0013098	0.00831496	0.00684902		0	0.881411	0.0831678	0.181582	0.0425944	0.00552388	0.392446	0.208209	0.404872	0.0366721
0.0593363	0.0359549	0.00857498	-0.0168232	0.00745074	-0.00868761	0.0109394	0.0041762	-0.00258102	0.00342263		0	0	0.490302	0.997384	0.177799	1	0.837158	0.696768	0.751302	0.363437
0.0659165	0.0365665	0.00138319	-0.0168232	0.00745074	-0.00868761	0.0109394	0.0041762	-0.00229115	0.00342263		0	0	0.509241	0.997474	0.181349	1	0.856446	0.735084	0.796523	0.365079
-0.0946516	-0.0710812	-0.047297	0.0141871	0.0147366	0.0114229	-0.0229154	-0.00432728	0.00548254	0.00179954		1	0.885803	0.685288	0.383007	0.656986	0	0.385799	0.377123	0.603758	0.555008
-0.117161	0.0193945	-0.0564818	-0.0671558	0.00375258	-0.00724265	-0.001697	0.00641615	-0.00144224	0.000267926		1	0.00439218	0.89624	0.999365	0.731526	0.994476	0.779375	0.805868	0.882358	0.778872
-0.116493	0.0193945	-0.0564818	-0.0671558	0.00375258	-0.00724265	-0.000580961	0.00641615	-0.00211049	0.000267926		1	0.00736752	0.899631	0.999221	0.73314	0.990734	0.785197	0.738223	0.922882	0.77723
-0.0883974	0.0202002	0.0362397	-0.0180977	0.0133873	-0.00724265	0.000610555	0.00522738	0.0059815	0.00380397		1	0.00439218	0.463221	0.997347	0.141013	0.994476	0.647433	0.744664	0.539351	0.334428
0.0636495	-0.109607	-0.0184882	0.0168828	0.0161372	0.0126933	0.00111402	-0.00389864	-0.00297331	0.00297657		0	0.881411	0.719563	0.509198	0.514037	0.00552388	0.417626	0.253353	0.647573	0.425698
0.0812235	0.0373257	0.0120263	-0.0365576	0.00531047	-0.00868761	0.00175628	0.00476096	-0.00297331	0.000521233		0	0	0.971024	0.999803	0.584059	1	0.67972	0.584651	0.834344	0.617542
0.0812235	0.0373257	0.0120263	-0.0365576	0.00531047	-0.00868761	0.00175628	0.00464398	-0.00297331	0.000521233		0	0	0.983307	0.999692	0.585834	1	0.682658	0.570301	0.862431	0.617269
0.0705724	0.0385043	-0.00926239	-0.0616392	0.0113098	-0.00868761	0.00269728	0.00357219	0.00302739	0.00373995		0	0	0.55699	0.998699	0.135689	1	0.683371	0.596181	0.623012	0.274904
-0.118037	0.0193945	-0.0167824	-0.0399684	0.00453253	-0.00724265	-0.000349539	0.00433232	-0.00176369	0.000585246		1	0.00439218	0.955773	0.999715	0.565666	0.994476	0.649451	0.666469	0.737087	0.611385
0.0802628	0.0370153	0.0120263	-0.0344518	0.0113098	-0.00868761	0.000591457	0.0033284	-0.00297331	0.000521233		0	0	1	1	0.477057	1	0.622565	0.534191	0.740889	0.50936
0.0704853	-0.189322	-0.0183347	0.0118229	-0.0409596	0.0126933	-0.0317478	-0.00732409	0.00300661	0.00179954		0	1	0.663431	0.251656	0.985479	0.00160371	0.17102	0	0.86731	0.779146
0.043413	-0.105765	0.0152155	0.0168828	0.0256038	0.0126933	0.00205501	-0.0013098	0.00802508	0.00684902		0	0.881411	0.0659278	0	0.0609874	0.00552388	0.588587	0.135956	0.585283	0.0533662
0.0419668	-0.107755	0.0152155	0.0168828	0.0256038	0.0116596	0.00205501	-0.0013098	-0.0026126	0.00633729		0	0.888212	0.0934257	0.0276366	0.0667958	0.0324305	0.588752	0.25279	0.641054	0.0566502
0.058137	0.0295926	0.0120444	0.0210401	0.00816433	-0.00845901	0.0159787	0.00323173	-0.00437838	0.000267926		0	0.01431	0.339992	0.994478	0.263311	0.982003	0.980587	0.95435	0.917732	0.536125
-0.0925547	-0.0954806	-0.047297	0.0161758	-0.0385019	0.012149	-0.00218155	0.00250536	-0.00187987	0.00147949		1	0.885803	0.670582	0.25615	0.985479	0	0.598816	0.548267	0.872282	0.835796
-0.0918864	-0.0879192	-0.047297	0.0170053	-0.0436231	0.0113067	-0.00218155	-0.00890435	-0.00243194	0.00179954		1	0.908898	0.679143	0.239227	0.985479	0.00641483	0.55858	0.347222	0.909279	0.829228
-0.0586581	-0.080026	0.0358999	-0.0251968	-0.0351218	0.00863876	-0.00170338	0.0106718	-0.0192279	-0.0411004		1	0.685463	0.264433	0.998519	1	0.137919	0.797011	0.869336	0.999177	1
-0.0632117	-0.0736077	0.0428803	0.0141871	0.0232362	0.011052	-0.0302575	-0.00173843	0.00386269	0.00589619		1	0.885803	0	0.0136957	0	0	0	0.23588	0	0
-0.0852299	0.0243426	0.0397091	0.0215704	0.00992956	-0.00724265	0.0159787	0.00428291	-0.0013714	0.000267926		1	0.00439218	0.348851	0.993644	0.2091	0.994476	0.942299	1	0.759044	0.500821
-0.0852299	0.0258438	0.0397091	0.0215704	0.00992956	-0.00724265	0.0159787	0.00428291	-0.0013714	0.000267926		1	0.00779258	0.357567	0.994534	0.21394	0.9902	1	0.998111	0.853169	0.502463
0.0636495	-0.109907	-0.0184882	0.0168828	0.015325	0.0126933	0.00111402	-0.00389864	-0.00297331	0.00159615		0	0.881411	0.709327	0.41091	0.677315	0.00552388	0.452808	0.228074	0.774958	0.556103
0.0636495	-0.111183	-0.0184882	0.0168828	0.015325	0.0116596	0.00111402	-0.00389864	-0.00297331	0.00179954		0	0.887929	0.729078	0.376683	0.679251	0.0327869	0.43945	0.200004	0.805881	0.555008
0.0807626	0.0231433	-0.027673	-0.0637712	0.00512094	-0.00845901	-0.000349539	0.00476096	-0.00477067	0.000585246		0	0.01431	0.895607	0.999342	0.749597	0.982003	0.649539	0.607895	0.928073	0.771757
0.043413	-0.106123	0.0152155	0.0168828	0.0256038	0.0126933	0.00205501	-0.0013098	0.00831496	0.00684902		0	0.881411	0.0831678	0.181582	0.0425944	0.00552388	0.392446	0.208209	0.408779	0.0366721
0.0593363	0.0359549	0.00857498	-0.0168232	0.00745074	-0.00868761	0.0109394	0.0041762	-0.00258102	0.00342263		0	0	0.490302	0.997384	0.177799	1	0.837158	0.696768	0.75402	0.363437
0.0659165	0.0365665	0.00138319	-0.0168232	0.00745074	-0.00868761	0.0109394	0.0041762	-0.00258102	0.00342263		0	0	0.509241	0.997474	0.181349	1	0.856446	0.735084	0.803985	0.365079
-0.0946516	-0.0710812	-0.047297	0.0141871	0.0147366	0.0114229	-0.0229154	-0.00432728	0.00548254	0.00179954		1	0.885803	0.685288	0.383007	0.656986	0	0.385799	0.377123	0.593854	0.555008
-0.117161	0.0193945	-0.0564818	-0.0671558	0.00375258	-0.00724265	-0.001697	0.00641615	-0.00144224	0.000267926		1	0.00439218	0.89624	0.999365	0.731526	0.994476	0.779375	0.805868	0.876834	0.778872
-0.116493	0.0193945	-0.0564818	-0.0671558	0.00375258	-0.00724265	-0.000580961	0.00641615	-0.00211049	0.000267926		1	0.00736752	0.899631	0.999221	0.73314	0.990734	0.785197	0.738223	0.920542	0.77723
-0.0883974	0.0202002	0.0362397	-0.0180977	0.0133873	-0.00724265	0.000610555	0.00522738	0.00569163	0.00380397		1	0.00439218	0.463221	0.997347	0.141013	0.994476	0.647433	0.744664	0.537404	0.334428
0.0636495	-0.109607	-0.0184882	0.0168828	0.0161372	0.0126933	0.00111402	-0.00389864	-0.00297331	0.00297657		0	0.881411	0.719563	0.509198	0.514037	0.00552388	0.417626	0.253353	0.645868	0.425698
0.0812235	0.0373257	0.0120263	-0.0365576	0.00531047	-0.00868761	0.00175628	0.00476096	-0.00297331	0.000521233		0	0	0.971024	0.999803	0.584059	1	0.67972	0.584651	0.833471	0.617542
0.0812235	0.0373257	0.0120263	-0.0365576	0.00531047	-0.00868761	0.00175628	0.00464398	-0.00297331	0.000521233		0	0	0.983307	0.999692	0.585834	1	0.682658	0.570301	0.86462	0.617269
0.0705724	0.0385043	-0.00926239	-0.0616392	0.0113098	-0.00868761	0.00269728	0.00357219	0.00273752	0.00373995		0	0	0.55699	0.998699	0.135689	1	0.683371	0.596181	0.626047	0.274904
-0.118037	0.0193945	-0.0167824	-0.0399684	0.00453253	-0.00724265	-0.000349539	0.00433232	-0.00176369	0.000585246		1	0.00439218	0.955773	0.999715	0.565666	0.994476	0.649451	0.666469	0.732159	0.611385
0.0802628	0.0370153	0.0120263	-0.0344518	0.0113098	-0.00868761	0.000591457	0.0033284	-0.00297331	0.000521233		0	0	1	1	0.477057	1	0.622565	0.534191	0.740433	0.50936
0.0704853	-0.178031	-0.0183347	0.0118229	-0.0409596	-0.000298297	-0.0317478	-0.00665777	0.00300661	0.00179954		0	1	0.717029	0.23736	1	0.231462	0.210868	0	0.726218	0.584087
0.042809	-0.101701	0.0129593	0.0160532	0.0216965	0.0123857	0.00205501	0.00358681	0.00802508	0.00652896		0	0.783873	0.18339	0.0101068	0.151964	0.0166321	0.60854	0.72625	0.355881	0.0863472
0.0417465	-0.0904093	0.0129593	0.0160532	0.0216965	-0.00473705	0.00205501	0.00323173	0.00831496	0.00652896		0	0.818222	0.235773	0.0364872	0.158403	0.994456	0.579122	0.741664	0.390501	0.0813743
0.0593363	0.0239171	0.00857498	-0.0356769	0.00776301	-0.00845901	0.0141393	0.0041762	-0.00229115	0.00164834		0	0.00465984	0.383856	0.998567	0.171925	0.754678	1	0.938127	0.881782	0.435353
-0.0916789	-0.0817082	-0.047297	0.0161758	-0.0385019	0.012149	-0.00218155	0.00765219	-0.00187987	0.00127609		1	0.784938	0.712798	0.220718	0.99678	0	0.459111	0.82947	0.711575	0.679024
-0.0901383	-0.0832714	-0.047297	0.0161758	-0.0385019	-0.00352069	-0.00218155	0.00459256	-0.00176369	0.00127609		1	0.861448	0.740744	0.222445	0.99678	0.319473	0.398675	0.776183	0.736224	0.665009
-0.0846103	0.00527194	0.0276031	-0.0660137	-0.0180132	0.0154344	-0.00509604	0.0110269	-0.027702	-0.0404549		1	0.0518351	0.305903	0.999425	0.99678	0.018018	0.746565	0.929859	1	1
-0.0623359	-0.0607277	0.0428803	0.0133576	0.0193289	0.0120328	-0.0302575	0.00463799	0.00595943	0.00652896		1	0.784849	0	0	0.0296201	0.00138596	0	0.711957	0.00225842	0
-0.0857213	0.0305774	0.0362397	-0.0371117	0.00999592	-0.00747125	0.0168761	0.00522738	-0.00169285	0.00373995		1	0.00110948	0.379532	0.998251	0.0347714	0.810118	0.883427	1	0.827455	0.342224
-0.0857213	0.0305774	0.0362397	-0.0371117	0.00921597	-0.00747125	0.0141393	0.00522738	-0.0013714	0.00342263		1	0.00284028	0.409351	0.998439	0.053445	0.783091	0.964008	0.999862	0.854675	0.35443
0.0650956	-0.104555	-0.0184882	0.0168828	0.0151953	0.0123857	0.00111402	0.00309821	0.00795425	0.00127609		0	0.783873	0.803233	0.428898	0.716248	0.0166321	0.426173	0.518573	0.597891	0.449819
0.0640332	-0.0932138	-0.0184882	0.0168828	0.0150536	-0.00473705	0.00111402	0.00203684	0.00266668	0.00265651		0	0.817867	0.835438	0.414473	0.718395	1	0.396222	0.505949	0.617648	0.44349
0.0812235	0.0231433	-0.027673	-0.0637712	0.00512094	-0.00845901	-0.000349539	0.00476096	-0.00268344	0.000585246		0	0.00465984	0.875436	0.999763	0.722902	0.754678	0.652478	0.622662	0.869333	0.673146
0.042809	-0.101701	0.0129593	0.0160532	0.0216965	0.0123857	0.00205501	0.00358681	0.00831496	0.00652896		0	0.783784	0.21626	0.240185	0.113329	0.018018	0.395887	0.726624	0.249547	0.0559072
0.0819872	0.0378949	-0.027673	-0.0616392	0.0105299	-0.00868761	0.00347976	0.0041762	-0.00265186	0.00354675		0	4.4378e-05	0.575184	0.999361	0.119554	0.82675	0.830656	0.888126	0.688372	0.287975
0.0819872	0.0378949	-0.027673	-0.0616392	0.00745074	-0.00868761	0.00866273	0.0041762	-0.00265186	0.00342263		0	0.00106511	0.613383	0.999379	0.127924	0.810811	0.84771	0.893218	0.708986	0.290386
-0.0937758	-0.0644537	-0.047297	0.0133576	0.0146069	0.0120328	-0.0229154	0.00582676	0.00559871	0.00127609		1	0.784849	0.707779	0.405209	0.674394	0.00138596	0.285929	0.772537	0.483352	0.448011
-0.117161	0.033577	-0.0564818	-0.062918	0.00472206	-0.00747125	0.00175628	0.00641615	-0.00176369	0.000521233		1	0.00110948	0.88473	0.999748	0.676111	0.810118	0.696368	0.919776	0.846343	0.673749
-0.117161	0.033577	-0.0564818	-0.062918	0.00394211	-0.00747125	-0.001697	0.00641615	-0.00144224	0.000203913		1	0.00284028	0.900502	0.999731	0.682335	0.783091	0.703083	0.901968	0.863633	0.673146
-0.0878182	0.0338855	0.0288579	-0.0608122	0.0130751	-0.00747125	0.000591457	0.00522738	0.00569163	0.00373995		1	0.00106511	0.46833	0.999294	0.0392788	0.810811	0.615811	0.903939	0.561463	0.232218
0.0646962	-0.103157	-0.0184882	0.0128273	0.0151953	0.0123857	-0.0229154	0.00417157	0.00793217	0.00652896		0	0.783784	0.769377	0.570208	0.555591	0.018018	0.376053	0.630921	0.48711	0.349307
0.0806195	0.0373257	0.0120263	-0.0344518	0.00531047	-0.00868761	-0.000349539	0.00536497	-0.00297331	0.000521233		0	4.4378e-05	0.969318	0.999922	0.558704	0.82675	0.651419	0.737284	0.750485	0.521172
0.0806195	0.0373257	0.0120263	-0.0344518	0.00531047	-0.00868761	-0.000349539	0.00536497	-0.00297331	0.000521233		0	0.00106511	1	0.999907	0.562889	0.810811	0.649873	0.730949	0.7649	0.520042
0.0834334	0.038485	-0.027673	-0.0616392	0.0113098	-0.00868761	0.00269728	0.0041762	0.00795425	0.00373995		0	0	0.583919	0.999719	0.100021	0.827443	0.672516	0.852977	0.552092	0.216621
-0.117161	0.0332666	-0.0564818	-0.0608122	0.00503246	-0.00747125	-0.000349539	0.00641615	-0.00176369	0.000521233		1	0.00106511	0.909424	0.999901	0.51803	0.810811	0.575298	0.874555	0.688698	0.506781
0.0796588	0.0371237	0.0120263	-0.0344518	0.0113098	-0.00868761	0.000591457	0.0041762	-0.00297331	0.00190165		0	0	0.981446	1	0.459047	0.827443	0.585032	0.765337	0.648657	0.422785
0.0719315	-0.178031	-0.0183347	0.0118229	-0.0409596	-0.000298297	-0.0317478	-0.00665777	0.0139342	0.00179954		0	1	0.717029	0.23736	0.976819	0.231462	0.210868	0	0.590108	0.588156
0.042809	-0.101701	0.0129593	0.0160532	0.0216965	0.0123857	0.00205501	0.00358681	0.00831496	0.00652896		0	0.783873	0.18339	0.0101068	0.124276	0.0166321	0.60854	0.72625	0.318716	0.0886076
0.0417465	-0.0904093	0.0129593	0.0160532	0.0216965	-0.00473705	0.00205501	0.00323173	0.00831496	0.00652896		0	0.818222	0.235773	0.0364872	0.130715	0.994456	0.579122	0.741664	0.352633	0.0831826
0.0593363	0.0239171	0.00857498	-0.0356769	0.00776301	-0.00845901	0.0141393	0.0041762	-0.00258102	0.00164834		0	0.00465984	0.383856	0.998567	0.146813	0.754678	1	0.938127	0.864638	0.41953
-0.0916789	-0.0817082	-0.047297	0.0161758	-0.0385019	0.012149	-0.00218155	0.00765219	-0.00187987	0.00127609		1	0.784938	0.712798	0.220718	0.972312	0	0.459111	0.82947	0.671403	0.683544
-0.0901383	-0.0832714	-0.047297	0.0161758	-0.0385019	-0.00352069	-0.00218155	0.00459256	-0.00176369	0.00127609		1	0.861448	0.740744	0.222445	0.972312	0.319473	0.398675	0.776183	0.696987	0.669078
-0.0846103	0.0161219	0.0288579	-0.0660137	-0.0180132	0.016107	-0.00499257	0.0110269	-0.00268115	-0.00289561		1	0.0518351	0.305903	0.999425	0.972312	0.018018	0.746565	0.929859	0.977987	0.982821
-0.0623359	-0.0663236	0.0428803	0.0133576	0.0193289	0.0116619	-0.0302575	0.00463799	0.00397887	0.00608786		1	0.784849	0	0	0	0.00138596	0	0.711957	0	0.00135624
-0.0857213	0.0305774	0.0362397	-0.0371117	0.00999592	-0.00747125	0.0168761	0.00522738	-0.00169285	0.00373995		1	0.00110948	0.379532	0.998251	0.00579525	0.810118	0.883427	1	0.828139	0.323237
-0.0857213	0.0305774	0.0362397	-0.0371117	0.00921597	-0.00747125	0.0141393	0.00522738	-0.0013714	0.00342263		1	0.00284028	0.409351	0.998439	0.0251127	0.783091	0.964008	0.999862	0.854741	0.335895
0.0650956	-0.104555	-0.0184882	0.0168828	0.0151953	0.0123857	0.00111402	0.00309821	0.00824412	0.00127609		0	0.783873	0.803233	0.428898	0.691135	0.0166321	0.426173	0.518573	0.526742	0.453436
0.0640332	-0.0932636	-0.0184882	0.0168828	0.0150536	-0.00473705	0.00111402	0.00203684	0.00824412	0.00127609		0	0.817867	0.835438	0.414473	0.693282	1	0.396222	0.505949	0.546576	0.446805
0.0812235	0.0231433	-0.027673	-0.0637712	0.00512094	-0.00845901	-0.000349539	0.00476096	-0.00297331	0.000585246		0	0.00465984	0.875436	0.999763	0.698648	0.754678	0.652478	0.622662	0.810911	0.663502
0.042809	-0.101701	0.0129593	0.0160532	0.0216965	0.0123857	0.00205501	0.00358681	0.00831496	0.00652896		0	0.783784	0.21626	0.240185	0.0849968	0.018018	0.395887	0.726624	0.223783	0.0577155
0.0819872	0.0378949	-0.027673	-0.0616392	0.0105299	-0.00868761	0.00347976	0.0041762	-0.00265186	0.00354675		0	4.4378e-05	0.575184	0.999361	0.0922945	0.82675	0.830656	0.888126	0.670498	0.277125
0.0819872	0.0378949	-0.027673	-0.0616392	0.00745074	-0.00868761	0.00866273	0.0041762	-0.00265186	0.00342263		0	0.00106511	0.613383	0.999379	0.10088	0.810811	0.84771	0.893218	0.690671	0.279536
-0.0937758	-0.0644537	-0.047297	0.0133576	0.0146069	0.0120328	-0.0229154	0.00582676	0.00559871	0.00127609		1	0.784849	0.707779	0.405209	0.648208	0.00138596	0.285929	0.772537	0.45613	0.451326
-0.117161	0.033577	-0.0564818	-0.062918	0.00472206	-0.00747125	0.00175628	0.00641615	-0.00176369	0.000521233		1	0.00110948	0.88473	0.999748	0.65014	0.810118	0.696368	0.919776	0.825843	0.663201
-0.117161	0.033577	-0.0564818	-0.062918	0.00394211	-0.00747125	-0.001697	0.00641615	-0.00144224	0.000203913		1	0.00284028	0.900502	0.999731	0.656579	0.783091	0.703083	0.901968	0.843238	0.662598
-0.0878182	0.0338855	0.0288579	-0.0608122	0.0130751	-0.00747125	0.000591457	0.00522738	0.00569163	0.00373995		1	0.00106511	0.46833	0.999294	0.0103027	0.810811	0.615811	0.903939	0.56096	0.220163
0.0646962	-0.102966	-0.0184882	0.0128273	0.0160075	0.0123857	-0.0229154	0.00417157	0.00822204	0.00652896		0	0.783784	0.769377	0.570208	0.529405	0.018018	0.376053	0.630921	0.438308	0.352321
0.0806195	0.0370153	0.0120263	-0.0344518	0.00562087	-0.00868761	-0.000349539	0.00536497	-0.00297331	0.000521233		0	4.4378e-05	0.969318	0.999922	0.533054	0.82675	0.651419	0.737284	0.708499	0.514316
0.0806195	0.0373257	0.0120263	-0.0344518	0.00531047	-0.00868761	-0.000349539	0.00536497	-0.00297331	0.000521233		0	0.00106511	1	0.999907	0.537347	0.810811	0.649873	0.730949	0.722849	0.51311
0.0834334	0.038485	-0.027673	-0.0616392	0.0113098	-0.00868761	0.00269728	0.0041762	0.00795425	0.00373995		0	0	0.583919	0.999719	0.0721185	0.827443	0.672516	0.852977	0.536478	0.208635
-0.117161	0.0332666	-0.0564818	-0.0608122	0.00503246	-0.00747125	-0.000349539	0.00641615	-0.00176369	0.000521233		1	0.00106511	0.909424	0.999901	0.491307	0.810811	0.575298	0.874555	0.671543	0.499322
0.081105	0.0371237	0.0120263	-0.0344518	0.0113098	-0.00868761	0.000591457	0.0041762	0.00266668	0.00190165		0	0	0.981446	1	0.432647	0.827443	0.585032	0.765337	0.615535	0.417541
0.0740744	-0.0780079	-0.0184882	0.0132492	-0.0409596	0.0116596	-0.0282861	-0.0169889	-0.00450287	-0.00550627		0	0.518394	0.579176	0.0916648	0.981586	0.0562355	0.25078	0.264365	0.885089	0.944444
0.0546193	-0.0566693	0.0152155	0.0168828	0.0256038	0.0109933	0.00205501	-0.00571859	0.00802508	0.00684902		0	0.260884	0.0977335	0	0.058312	0.0721138	0.536775	0.13573	0.583317	0.0597884
0.0546193	-0.0566693	0.0152155	0.0168828	0.0256038	0.0116596	0.00205501	-0.00638491	0.00302739	0.00684902		0	0.316145	0.0704593	0.0401292	0.056266	0.0648363	0.536293	0.480548	0.620305	0.04709
0.06159	0.0210177	0.0048526	0.0192331	0.00841913	-0.00633215	0.0159787	0.00323173	-0.00408851	0.00482299		0	0.0616868	0.510525	0.995886	0.337596	0.996692	0.99011	0.985354	0.927526	0.374603
-0.0892796	-0.0756357	-0.000842576	0.0161758	-0.0385019	0.012149	-0.00218155	0.00704207	-0.00187987	-0.0473797		1	0.295904	0.571332	0.0851542	0.974936	0	0.52188	0.572585	0.862773	1
-0.108136	-0.0758539	-0.047297	0.0170053	-0.0436231	0.010273	-0.00218155	-0.0174176	-0.00243194	-0.0523299		1	0.333012	0.579783	0.106045	0.976982	0.0301025	0.527761	0	0.891892	0.995767
-0.0769009	-0.15461	0.00316777	-0.0503493	-0.0263111	-0.00419332	0.0242374	0.00613508	-0.0316455	0.00116217		1	1	0.518175	1	1	0.386702	0.858592	0.872039	1	0.788889
-0.0789961	-0.0441633	0.0428803	0.0133576	0.0193289	0.00931138	-0.0302575	0.00208211	0.00595943	0.00652896		1	0.260884	0	0.0276688	0	0.0721138	0	0.571199	0.130673	0
-0.0806952	0.0164184	0.0397091	0.0197633	0.0101844	-0.0051158	0.0159787	0.00428291	-0.0013714	0.00482299		1	0.0345382	0.502802	0.995209	0.294118	0.538207	0.936766	0.999869	0.810097	0.353968
-0.0902366	0.017269	0.0163957	0.0197633	0.0101844	-0.0051158	0.0159787	0.00428291	-0.0013714	0.00482299		1	0.0388755	0.513159	0.995721	0.298721	0.635792	1	1	0.861749	0.355026
0.0748559	-0.0608119	-0.0184882	0.0168828	0.015325	0.0109933	0.00111402	-0.00830744	-0.00297331	0.00159615		0	0.260884	0.642683	0.18048	0.671611	0.0721138	0.436478	0.324227	0.77706	0.668078
0.0748559	-0.0608119	-0.0184882	0.0168828	0.015325	0.0109933	0.00111402	-0.00830744	-0.00297331	0.00159615		0	0.306988	0.634036	0.204937	0.671611	0.0836917	0.438278	0.248304	0.799095	0.662434
0.0801586	0.0150478	0.0120263	-0.0407954	0.00537574	-0.00633215	0.00175628	0.00536497	-0.0044808	0.00192158		0	0.0600803	0.939297	0.999202	0.773061	1	0.699828	0.707253	0.937538	0.702646
0.0546193	-0.0570273	0.0152155	0.0136569	0.0256038	0.0109933	-0.0219744	-0.00571859	0.00829288	0.00684902		0	0.258313	0.105389	0.156015	0.0381926	0.0774065	0.357689	0.395826	0.444765	0.0356261
0.078521	0.0388399	-0.0168217	0.0202201	0.0109312	-0.00868761	0.00700567	0.00323173	-0.00265186	0.00354675		0	0.00208835	0.588536	0.993682	0.230009	0.605028	0.821217	0.706985	0.773646	0.262787
0.078521	0.0215316	-0.0168217	0.0210401	0.00841913	-0.00633215	0.0127787	0.00323173	-0.00236199	0.00482299		0	0.0268273	0.579102	0.993873	0.230861	0.660602	0.842134	0.821967	0.803193	0.258907
-0.110901	-0.048166	-0.047297	0.0141871	0.0147366	0.00960668	-0.0229154	-0.00873607	0.000311154	0.00159615		1	0.260884	0.590578	0.203747	0.650639	0.0721138	0.34988	0.381261	0.628446	0.665256
-0.116493	0.011299	-0.0564818	-0.0671558	0.00478733	-0.0051158	0.00175628	0.00641615	-0.00211049	0.00192158		1	0.0345382	0.926694	0.999075	0.756351	0.538207	0.772413	0.814831	0.890957	0.714286
-0.117369	0.011299	-0.0564818	-0.0671558	0.00400738	-0.0051158	-0.000580961	0.00433232	-0.00211049	0.00160427		1	0.0372691	0.934665	0.998868	0.758568	0.6391	0.795451	0.624013	0.91788	0.713228
-0.0955434	0.0348519	0.0163957	0.0202037	0.0134764	-0.00747125	0.00205501	0.00428291	0.00569163	0.00373995		1	0.00257027	0.535786	0.993367	0.197613	0.604036	0.645589	0.857023	0.60084	0.236332
0.0748559	-0.0606205	-0.0184882	0.0168828	0.0161372	0.0109933	0.00111402	-0.00830744	-0.00297331	0.00159615		0	0.258313	0.636518	0.296351	0.508014	0.0774065	0.395581	0.337404	0.662341	0.507848
0.0812235	0.0362365	-0.00172719	-0.012877	0.00531047	-0.00868761	0.0040329	0.00476096	-0.00297331	0.000521233		0	0.00208835	1	0.997595	0.607758	0.605028	0.682484	0.638324	0.8448	0.586949
0.0812235	0.0183525	-0.00172719	-0.012721	0.00537574	-0.00633215	0.0040329	0.00476096	-0.00297331	0.00192158		0	0.0258635	0.996997	0.997265	0.608525	0.662587	0.693923	0.600384	0.864427	0.584303
0.0807347	0.0388399	-0.0168217	0.0202201	0.0117112	-0.00868761	0.00681327	0.00323173	-0.00268344	0.00373995		0	0	0.59665	0.989838	0.174169	0.609328	0.666657	0.69545	0.655611	0.198413
-0.118037	0.0324878	-0.030536	-0.0143075	0.00472206	-0.00747125	-0.000330441	0.00433232	-0.00176369	0.000521233		1	0.00257027	0.965194	0.997077	0.590793	0.604036	0.640833	0.669282	0.759531	0.582275
0.0804851	0.0394758	-0.00951287	0.0123646	0.00602219	-0.00868761	0.00111402	0.00381649	-0.00297331	0.000521233		0	0	0.997457	0.994323	0.497852	0.609328	0.615896	0.588169	0.757342	0.491958
0.0745353	-0.0780079	-0.0184882	0.0132492	-0.0409596	0.0116596	-0.0282861	-0.0169889	-0.00270552	-0.00550627		0	0.518394	0.579176	0.0916648	0.981586	0.0562355	0.25078	0.264365	0.7834	0.944444
0.0546193	-0.0570273	0.0152155	0.0168828	0.0256038	0.0109933	0.00205501	-0.00571859	0.00802508	0.00684902		0	0.260884	0.0977335	0	0.058312	0.0721138	0.536775	0.13573	0.474049	0.0597884
0.0546193	-0.0570273	0.0152155	0.0168828	0.0256038	0.0116596	0.00205501	-0.00638491	0.00831496	0.00684902		0	0.316145	0.0704593	0.0401292	0.056266	0.0648363	0.536293	0.480548	0.499753	0.04709
0.06159	0.0210177	0.0048526	0.0192331	0.00841913	-0.00633215	0.0159787	0.00323173	-0.00437838	0.00482299		0	0.0616868	0.510525	0.995886	0.337596	0.996692	0.99011	0.985354	0.895604	0.374603
-0.0892796	-0.0759937	-0.000842576	0.0161758	-0.0385019	0.012149	-0.00218155	0.00704207	-0.00187987	-0.0473797		1	0.295904	0.571332	0.0851542	0.974936	0	0.52188	0.572585	0.7802	1
-0.108804	-0.0762119	-0.047297	0.0170053	-0.0436231	0.010273	-0.00218155	-0.0174176	-0.00176369	-0.0523299		1	0.333012	0.579783	0.106045	0.976982	0.0301025	0.527761	0	0.799543	0.995767
-0.0769009	-0.15461	0.00442256	-0.0503493	-0.0263111	-0.00352069	0.0243409	0.00613508	-0.0150988	0.00116217		1	1	0.518175	1	1	0.386702	0.858592	0.872039	0.978855	0.788889
-0.0789961	-0.0388339	0.0428803	0.0133576	0.0193289	0.0094649	-0.0302575	0.00208211	0.00397887	0.00608786		1	0.260884	0	0.0276688	0	0.0721138	0	0.571199	0	0
-0.0806952	0.0164184	0.0397091	0.0197633	0.0101844	-0.0051158	0.0159787	0.00428291	-0.0013714	0.00482299		1	0.0345382	0.502802	0.995209	0.294118	0.538207	0.936766	0.999869	0.791937	0.353968
-0.0902366	0.017269	0.0163957	0.0197633	0.0101844	-0.0051158	0.0159787	0.00428291	-0.0013714	0.00482299		1	0.0388755	0.513159	0.995721	0.298721	0.635792	1	1	0.836507	0.355026
0.0748559	-0.0608119	-0.0184882	0.0168828	0.015325	0.0109933	0.00111402	-0.00830744	-0.00297331	0.00159615		0	0.260884	0.642683	0.18048	0.671611	0.0721138	0.436478	0.324227	0.679216	0.668078
0.0748559	-0.0608119	-0.0184882	0.0168828	0.015325	0.0109933	0.00111402	-0.00830744	-0.00297331	0.00159615		0	0.306988	0.634036	0.204937	0.671611	0.0836917	0.438278	0.248304	0.694232	0.662434
0.0801586	0.0150478	0.0120263	-0.0407954	0.00537574	-0.00633215	0.00175628	0.00536497	-0.00477067	0.00192158		0	0.0600803	0.939297	0.999202	0.773061	1	0.699828	0.707253	0.885953	0.702646
0.0546193	-0.0570273	0.0152155	0.0136569	0.0256038	0.0109933	-0.0219744	-0.00571859	0.00829288	0.00684902		0	0.258313	0.105389	0.156015	0.0381926	0.0774065	0.357689	0.395826	0.324601	0.0356261
0.078521	0.0388399	-0.0168217	0.0202201	0.0109312	-0.00868761	0.00700567	0.00323173	-0.00265186	0.00354675		0	0.00208835	0.588536	0.993682	0.230009	0.605028	0.821217	0.706985	0.72053	0.262787
0.078521	0.0215316	-0.0168217	0.0210401	0.00841913	-0.00633215	0.0127787	0.00323173	-0.00265186	0.00482299		0	0.0268273	0.579102	0.993873	0.230861	0.660602	0.842134	0.821967	0.743955	0.258907
-0.110901	-0.048166	-0.047297	0.0141871	0.0147366	0.00960668	-0.0229154	-0.00873607	0.00559871	0.00159615		1	0.260884	0.590578	0.203747	0.650639	0.0721138	0.34988	0.381261	0.526581	0.665256
-0.117161	0.011299	-0.0564818	-0.0671558	0.00478733	-0.0051158	0.00175628	0.00641615	-0.00144224	0.00192158		1	0.0345382	0.926694	0.999075	0.756351	0.538207	0.772413	0.814831	0.850331	0.714286
-0.118037	0.011299	-0.0564818	-0.0671558	0.00400738	-0.0051158	-0.000580961	0.00433232	-0.00144224	0.00160427		1	0.0372691	0.934665	0.998868	0.758568	0.6391	0.795451	0.624013	0.871635	0.713228
-0.0955434	0.0348519	0.0163957	0.0202037	0.0134764	-0.00747125	0.00205501	0.00428291	0.00569163	0.00373995		1	0.00257027	0.535786	0.993367	0.197613	0.604036	0.645589	0.857023	0.542815	0.236332
0.076302	-0.0606205	-0.0184882	0.0168828	0.0161372	0.0109933	0.00111402	-0.00830744	0.00795425	0.00159615		0	0.258313	0.636518	0.296351	0.508014	0.0774065	0.395581	0.337404	0.556158	0.507848
0.0812235	0.0362365	-0.00172719	-0.012877	0.00531047	-0.00868761	0.0040329	0.00476096	-0.00297331	0.000521233		0	0.00208835	1	0.997595	0.607758	0.605028	0.682484	0.638324	0.784007	0.586949
0.0812235	0.0183525	-0.00172719	-0.012721	0.00537574	-0.00633215	0.0040329	0.00476096	-0.00297331	0.00192158		0	0.0258635	0.996997	0.997265	0.608525	0.662587	0.693923	0.600384	0.798944	0.584303
0.0821808	0.0388399	-0.0168217	0.0202201	0.0117112	-0.00868761	0.00681327	0.00323173	0.00795425	0.00373995		0	0	0.59665	0.989838	0.174169	0.609328	0.666657	0.69545	0.582975	0.198413
-0.118037	0.0324878	-0.030536	-0.0143075	0.00472206	-0.00747125	-0.000330441	0.00433232	-0.00176369	0.000521233		1	0.00257027	0.965194	0.997077	0.590793	0.604036	0.640833	0.669282	0.69784	0.582275
0.0804851	0.0394758	-0.00951287	0.0123646	0.00602219	-0.00868761	0.00111402	0.00381649	-0.00297331	0.000521233		0	0	0.997457	0.994323	0.497852	0.609328	0.615896	0.588169	0.683985	0.491958
0.0745353	-0.0257021	-0.0171897	0.0176167	0.00840561	0.0128094	-0.0229154	-0.0135635	-0.00311157	-0.00486078		0	0.105133	0.576102	0.0996219	0.736937	0	0.334222	0.413644	0.64163	0.901549
0.0546193	-0.0265331	0.0139326	0.0176167	0.0186844	0.0116596	-0.0219744	-0.00638491	0.00829288	0.00546036		0	0.0817699	0.0370751	0	0.00630632	0.0402439	0.307978	0	0.450401	0.0132743
0.0546193	-0.0265331	0.0139326	0.0176167	0.0186844	0.0126933	-0.0219744	-0.00638491	0.00829288	0.00546036		0	0.0902655	0	0.0595386	0	0.00670733	0.319436	0.343839	0.492036	0
0.0804827	0.0442809	-0.0159348	0.0206325	0.00268863	0.00403174	0.0235285	0.0068507	-0.0279698	-0.0196674		0	0.00955752	0.594699	0.984049	0.803604	0.164634	0.985724	0.990376	0.995392	1
-0.0892796	-0.0128381	0.000455897	0.0213728	0.00754578	0.012149	0.00111402	0.00264383	-0.00187987	8.94188e-05		1	0.106903	0.567816	0.10468	0.736937	0	0.588771	0.504232	0.761354	0.901549
-0.108804	-0.0130563	-0.0459985	0.0213728	0.0078172	0.0114229	0.00111402	-0.0139921	-0.00187987	-0.00486078		1	0.0941593	0.58103	0.146634	0.736937	0	0.629878	0.0665469	0.798759	0.903761
-0.0775692	-0.137412	0.00442256	-0.0503493	-0.0263111	-0.00352069	0.0275408	0.00553704	0.00434073	0.00116217		1	1	0.537911	1	1	1	0.960885	0.717217	0.86222	0.576327
-0.079461	-0.0138873	0.0415974	0.0181469	0.0163168	0.010273	-0.0302575	-0.00681355	0.00595943	0.00546036		1	0.0835398	0.0265128	0.055148	0.0036036	0.0182927	0	0.389527	0.112952	0.00884956
-0.116963	0.00390063	-0.0456305	0.0211627	0.00235502	0.0144193	0.023632	0.00790188	-0.00275198	-0.0379984		1	0.0261947	0.595846	0.982489	0.801802	0.139024	0.979596	1	0.968866	0.995575
-0.116963	0.0487909	-0.0447436	0.0211627	0.00210022	0.0262908	0.0235285	0.00790188	-0.0256311	-0.0196674		1	0.0109734	0.613105	0.98604	0.802703	0.143293	1	0.991813	1	1
0.076302	-0.0255107	-0.0171897	0.0208425	0.0092178	0.0116596	0.00111402	-0.00897376	0.00266668	0.00224164		0	0.0817699	0.589582	0.220353	0.493393	0.0402439	0.410324	0.305959	0.617795	0.605457
0.0748559	-0.0255107	-0.0171897	0.0208425	0.0092178	0.0126933	0.00111402	-0.00897376	-0.00297331	0.00224164		0	0.0902655	0.575952	0.264854	0.491291	0.00670733	0.427846	0.274677	0.644142	0.60177
0.0809435	0.0344114	-0.00172719	-0.00355888	-0.0136593	0.00470436	0.000737338	0.00778844	-0.00297331	0.000585246		0	0.00955752	0.995692	0.996391	0.846847	0.164634	0.760277	0.707079	0.833081	0.825959
0.0546193	-0.0265331	0.0139326	0.0176167	0.0145516	0.0116596	-0.0302575	-0.00638491	0.00829288	0.00546036		0	0.080708	0.0490163	0.168945	0.0033033	0.0231707	0.209138	0.244455	0.351796	0.00737463
0.0815475	0.0430622	-0.0168217	0.0202201	0.00571179	0.00598672	0.00587228	0.00381649	-0.00268344	0.000521233		0	0.00106194	0.617389	0.970794	0.537237	0.179268	0.757766	0.663459	0.804886	0.669617
0.0809435	0.0408769	-0.0168217	0.0210401	0.00633446	0.02835	0.00587228	0.00442049	-0.00268344	0.000585246		0	0.00743363	0.599071	0.972135	0.535435	0.14939	0.768387	0.775343	0.829143	0.666667
-0.110901	-0.0128649	-0.0459985	0.0213728	0.00862939	0.010273	0.00111402	-0.00940239	0.00562079	0.00224164		1	0.0835398	0.592643	0.267751	0.492492	0.0182927	0.406216	0.320102	0.557688	0.60472
-0.117631	0.0147902	-0.030536	-0.00302866	-0.00372524	0.0144193	0.0172876	0.00883962	-0.00144224	0.00172838		1	0.0261947	0.986897	0.996652	0.846246	0.139024	0.843084	0.740483	0.864147	0.824484
-0.117839	0.0404614	-0.0383217	0.0120468	-0.0043536	0.0269634	0.019127	0.00581132	-0.00211049	0.000392038		1	0.0109734	1	0.995652	0.846547	0.143293	0.863588	0.591859	0.886993	0.826696
-0.117631	0.0475723	-0.0456305	0.0207503	0.00512338	0.0282458	0.00587228	0.00547167	-0.00147382	0.000521233		1	0.00283185	0.616461	0.97225	0.536036	0.157317	0.659865	0.79378	0.69394	0.668142
0.0618763	-0.0255107	-0.00372468	0.0176167	0.0186844	0.0116596	-0.0219744	-0.00638491	0.00793217	0.00224164		0	0.080708	0.558019	0.363351	0.37012	0.0231707	0.363381	0.286298	0.542855	0.45483
0.0815475	0.0430622	-0.00951287	0.0129112	0.00571179	0.00598672	0.00587228	0.00381649	-0.00297331	0.000521233		0	0.00106194	0.957418	0.989101	0.680931	0.179268	0.692863	0.604245	0.779977	0.731379
0.0815475	0.0406855	-0.00951287	0.0137313	0.00552226	0.02835	0.00587228	0.00381649	-0.00297331	0.000585246		0	0.00743363	0.945463	0.986932	0.68003	0.14939	0.705024	0.587239	0.79834	0.730273
0.0671218	0.0510692	-0.0033567	0.0196735	0.0117112	0.0296324	0.00205501	0.00262772	-0.00268344	0.000521233		0	0	0.56879	0.94355	0.403003	0.162195	0.598789	0.619259	0.669941	0.50295
-0.118507	0.0475723	-0.0383217	0.0134414	0.00512338	0.0282458	0.00587228	0.00338785	-0.00176369	0.000521233		1	0.00283185	0.954961	0.987437	0.68033	0.157317	0.693188	0.611556	0.750692	0.73101
0.0815475	0.051321	-0.0168217	0.0196735	0.00571179	0.0296324	0.00111402	0.00369951	-0.00297331	0.000521233		0	0	0.88212	0.969636	0.562883	0.162195	0.610649	0.541719	0.708361	0.630088
0.0759814	-0.0257021	-0.0171897	0.0176167	0.00840561	0.0128094	-0.0229154	-0.0135635	0.00781599	-0.00486078		0	0.105133	0.576102	0.0996219	0.736937	0	0.334222	0.413644	0.51744	0.901549
0.0546193	-0.0265331	0.0139326	0.0176167	0.0186844	0.0116596	-0.0219744	-0.00638491	0.00829288	0.00546036		0	0.0817699	0.0370751	0	0.00630632	0.0402439	0.307978	0	0.378589	0.0132743
0.0546193	-0.0265331	0.0139326	0.0176167	0.0186844	0.0126933	-0.0219744	-0.00638491	0.00829288	0.00546036		0	0.0902655	0	0.0595386	0	0.00670733	0.319436	0.343839	0.41759	0
0.0804827	0.0442809	-0.0168217	0.0206325	0.00268863	0.00470436	0.023632	0.0068507	-0.00509071	-0.0196674		0	0.00955752	0.594699	0.984049	0.803604	0.164634	0.985724	0.990376	0.972304	1
-0.0892796	-0.0128381	0.000455897	0.0213728	0.00754578	0.012149	0.00111402	0.00264383	-0.00187987	8.94188e-05		1	0.106903	0.567816	0.10468	0.736937	0	0.588771	0.504232	0.704977	0.901549
-0.108804	-0.0130563	-0.0459985	0.0213728	0.0078172	0.0114229	0.00111402	-0.0139921	-0.00187987	-0.00486078		1	0.0941593	0.58103	0.146634	0.736937	0	0.629878	0.0665469	0.744635	0.903761
-0.0775692	-0.137412	0.00442256	-0.0503493	-0.0263111	-0.00352069	0.0275408	0.00553704	0.00434073	0.00116217		1	1	0.537911	1	1	1	0.960885	0.717217	0.826534	0.576327
-0.079461	-0.00855785	0.0415974	0.0181469	0.0163168	0.0104265	-0.0302575	-0.00681355	0.00397887	0.00501926		1	0.0835398	0.0265128	0.055148	0.0036036	0.0182927	0	0.389527	0	0.00884956
-0.116963	0.00296926	-0.0456305	0.0211627	0.00235502	0.0144193	0.023632	0.00790188	-0.00182062	-0.0379984		1	0.0261947	0.595846	0.982489	0.801802	0.139024	0.979596	1	0.952522	0.995575
-0.116963	0.0487909	-0.0456305	0.0211627	0.00210022	0.0269634	0.023632	0.00790188	-0.00275198	-0.0196674		1	0.0109734	0.613105	0.98604	0.802703	0.143293	1	0.991813	0.984464	1
0.076302	-0.0255107	-0.0171897	0.0208425	0.0092178	0.0116596	0.00111402	-0.00897376	0.00795425	0.00224164		0	0.0817699	0.589582	0.220353	0.493393	0.0402439	0.410324	0.305959	0.533669	0.605457
0.076302	-0.0255107	-0.0171897	0.0208425	0.0092178	0.0126933	0.00111402	-0.00897376	0.00795425	0.00224164		0	0.0902655	0.575952	0.264854	0.491291	0.00670733	0.427846	0.274677	0.559888	0.60177
0.0809435	0.0344114	-0.00172719	-0.00355888	-0.0136593	0.00470436	0.000737338	0.00778844	-0.00297331	0.000585246		0	0.00955752	0.995692	0.996391	0.846847	0.164634	0.760277	0.707079	0.772093	0.825959
0.0546193	-0.0265331	0.0139326	0.0176167	0.0145516	0.0116596	-0.0302575	-0.00638491	0.00829288	0.00546036		0	0.080708	0.0490163	0.168945	0.0033033	0.0231707	0.209138	0.244455	0.265393	0.00737463
0.0815475	0.0430622	-0.0168217	0.0202201	0.00571179	0.00598672	0.00587228	0.00381649	-0.00268344	0.000521233		0	0.00106194	0.617389	0.970794	0.537237	0.179268	0.757766	0.663459	0.767805	0.669617
0.0809435	0.0408769	-0.0168217	0.0210401	0.00633446	0.02835	0.00587228	0.00442049	-0.00268344	0.000585246		0	0.00743363	0.599071	0.972135	0.535435	0.14939	0.768387	0.775343	0.791453	0.666667
-0.110901	-0.0128649	-0.0459985	0.0213728	0.00862939	0.010273	0.00111402	-0.00940239	0.00562079	0.00224164		1	0.0835398	0.592643	0.267751	0.492492	0.0182927	0.406216	0.320102	0.483204	0.60472
-0.117631	0.0147902	-0.030536	-0.00302866	-0.00372524	0.0144193	0.0172876	0.00883962	-0.00144224	0.00172838		1	0.0261947	0.986897	0.996652	0.846246	0.139024	0.843084	0.740483	0.828011	0.824484
-0.118507	0.0404614	-0.0383217	0.0120468	-0.0043536	0.0269634	0.019127	0.00581132	-0.00144224	0.000392038		1	0.0109734	1	0.995652	0.846547	0.143293	0.863588	0.591859	0.851878	0.826696
-0.117631	0.0475723	-0.0456305	0.0207503	0.00512338	0.0282458	0.00587228	0.00547167	-0.00147382	0.000521233		1	0.00283185	0.616461	0.97225	0.536036	0.157317	0.659865	0.79378	0.645662	0.668142
0.0618763	-0.0255107	-0.00372468	0.0176167	0.0186844	0.0116596	-0.0219744	-0.00638491	0.00793217	0.00224164		0	0.080708	0.558019	0.363351	0.37012	0.0231707	0.363381	0.286298	0.460539	0.45483
0.0815475	0.0430622	-0.00951287	0.0129112	0.00571179	0.00598672	0.00587228	0.00381649	-0.00297331	0.000521233		0	0.00106194	0.957418	0.989101	0.680931	0.179268	0.692863	0.604245	0.725394	0.731379
0.0815475	0.0406855	-0.00951287	0.0137313	0.00552226	0.02835	0.00587228	0.00381649	-0.00297331	0.000585246		0	0.00743363	0.945463	0.986932	0.68003	0.14939	0.705024	0.587239	0.743828	0.730273
0.068568	0.0510692	-0.0033567	0.0196735	0.0117112	0.0296324	0.00205501	0.00262772	0.00295656	0.000521233		0	0	0.56879	0.94355	0.403003	0.162195	0.598789	0.619259	0.617578	0.50295
-0.118507	0.0475723	-0.0383217	0.0134414	0.00512338	0.0282458	0.00587228	0.00338785	-0.00176369	0.000521233		1	0.00283185	0.954961	0.987437	0.68033	0.157317	0.693188	0.611556	0.702189	0.73101
0.0815475	0.051321	-0.0168217	0.0196735	0.00571179	0.0296324	0.00111402	0.00369951	-0.00297331	0.000521233		0	0	0.88212	0.969636	0.562883	0.162195	0.610649	0.541719	0.649906	0.630088
0.0759814	-0.0237368	-0.0171897	0.0176167	0.00827592	0.0134194	-0.0229154	0.00377875	0.00793217	8.94188e-05		0	0.136255	0.595442	0.101091	0.730028	0.00306561	0.262586	0.507944	0.599784	0.941808
0.0546193	-0.0265331	0.0139326	0.0176167	0.0186844	0.0116596	-0.0219744	-0.00638491	0.00829288	0.00546036		0	0.100308	0.0112283	0	0.00482093	0.0141018	0.327655	0	0.303428	0.0107431
0.0546193	-0.0265331	0.0139326	0.0176167	0.0186844	0.0126933	-0.0219744	-0.00638491	0.00829288	0.00546036		0	0.115714	0	0.0734684	0.00137742	0.000613136	0.325032	0.343648	0.415933	0
0.0804827	0.0415259	-0.0168217	0.0210401	0.00166316	-0.00431555	0.0150377	0.00625266	-0.00415934	-0.0196674		0	0.0136939	0.659672	0.96604	0.748623	0.222563	0.999907	0.995536	0.953859	0.997314
-0.108804	-0.0128381	-0.0459985	0.0205432	0.00768751	0.012149	0.00111402	0.00521664	-0.00187987	-0.00607212		1	0.108182	0.611275	0.0964747	0.729339	0	0.441782	0.557036	0.726584	0.948075
-0.108804	-0.0126983	-0.0459985	0.0213728	0.0078172	0.0113067	0.00111402	-0.0139921	-0.00147382	-0.0110223		1	0.114344	0.607335	0.150767	0.730028	0.00306561	0.468184	0.069398	0.8174	0.948075
-0.100783	-0.154762	-0.0579948	-0.0503493	-0.0263111	-0.00352069	0.0275408	0.00553704	-0.0154595	0.00116217		1	1	0.753607	1	1	1	0.914333	0.918372	0.984225	0.704566
-0.0789961	-0.00855785	0.0415974	0.0181469	0.0163168	0.0104265	-0.0302575	-0.00681355	0.00397887	0.00501926		1	0.100308	4.27582e-05	0.0636062	0	0.0141018	0	0.36638	0.104525	0.00447628
-0.116963	0.0375381	-0.0456305	0.0215704	0.00107475	-0.00570214	0.0150377	0.00730384	-0.00182062	-0.0196674		1	0.00616228	0.682647	0.962903	0.746556	0.18271	0.98864	1	0.940527	1
-0.116963	0.0387085	-0.0447436	0.0215704	0.00107475	-0.00637476	0.0149342	0.00730384	-0.017157	-0.0196674		1	0.0102705	0.681344	0.969093	0.746556	0.189454	1	0.996555	1	0.998209
0.076302	-0.0255107	-0.0171897	0.0176167	0.0177237	0.0116596	-0.0219744	-0.00638491	0.00822204	0.00224164		0	0.100308	0.604036	0.239201	0.488062	0.0141018	0.344008	0.354993	0.543266	0.633542
0.076302	-0.0255107	-0.0171897	0.0176167	0.0177237	0.0126933	-0.0219744	-0.00638491	0.00293448	0.00224164		0	0.114002	0.596246	0.286131	0.487144	0.00367872	0.351934	0.306997	0.611039	0.629961
0.0809435	0.0352315	-0.00951287	0.0133236	-0.0148077	-0.00431555	0.00257671	0.00867613	-0.00297331	-0.00124692		0	0.0126669	0.985365	0.978267	0.826217	0.224402	0.725609	0.807284	0.845956	0.881229
0.0546193	-0.0265331	0.0139326	0.0176167	0.0145516	0.0116596	-0.0302575	-0.00638491	0.00829288	0.00546036		0	0.100308	0.0372856	0.18661	0.00206609	0.0141018	0.217562	0.236676	0.274629	0.00507311
0.0815475	0.0394173	-0.0168217	0.0202201	0.00602219	-0.00454415	0.00587228	0.00381649	-0.00268344	0.000521233		0	0	0.686288	0.876568	0.5	0.193746	0.772068	0.665179	0.732605	0.669352
0.0809435	0.0307945	-0.0168217	0.0210401	0.00633446	-0.00431555	0.00587228	0.00442049	-0.00268344	0.000585246		0	0.0102705	0.676974	0.88103	0.498852	0.189454	0.77498	0.778579	0.789931	0.665175
-0.110901	-0.0128649	-0.0459985	0.0181469	0.0171353	0.010273	-0.0219744	-0.00681355	0.00588859	0.00224164		1	0.100308	0.60101	0.282243	0.486455	0.0141018	0.303322	0.330938	0.549503	0.633542
-0.116963	0.0314827	-0.0383217	0.0138538	-0.0153961	-0.00570214	0.00257671	0.00972731	-0.00243194	-0.00124692		1	0.00616228	1	0.977518	0.825298	0.18271	0.781585	0.825136	0.883779	0.884214
-0.117839	0.0314827	-0.0383217	0.0138538	-0.0153961	-0.00570214	0.00276911	0.00764349	-0.00211049	-0.00124692		1	0.00924341	0.997462	0.975021	0.825528	0.191294	0.794172	0.661442	0.933875	0.883617
-0.117631	0.0356685	-0.0456305	0.0207503	0.00543378	-0.00593073	0.00587228	0.00547167	-0.00147382	0.000521233		1	0	0.692511	0.876713	0.497704	0.193746	0.66288	0.787645	0.681684	0.667562
0.06409	-0.0254329	0.00122087	0.0176167	0.0186844	0.0116596	-0.0219744	-0.00638491	0.00829288	0.00224164		0	0.100308	0.54207	0.358696	0.365932	0.0141018	0.304207	0.307401	0.494609	0.47553
0.0815475	0.0397276	-0.00951287	0.0129112	0.00571179	-0.00454415	0.00587228	0.00381649	-0.00297331	0.000521233		0	0	0.979971	0.893953	0.659894	0.193746	0.655817	0.663148	0.751401	0.767084
0.0815475	0.0306031	-0.00951287	0.0137313	0.00552226	-0.00431555	0.00587228	0.00381649	-0.00297331	0.000585246		0	0.00924341	0.974121	0.883949	0.659435	0.191294	0.661674	0.638575	0.7952	0.764996
0.0816336	0.0394758	-0.0168217	0.0196735	0.0117112	-0.00454415	0.00205501	0.00262772	0.00295656	0.000521233		0	0	0.659625	0.614606	0.374656	0.193746	0.606872	0.61702	0.619712	0.501791
-0.118507	0.0359789	-0.0383217	0.0128948	0.00512338	-0.00593073	0.00111402	0.00338785	-0.00176369	0.000521233		1	0	0.987782	0.881443	0.658747	0.193746	0.63549	0.65129	0.76221	0.767234
0.0815475	0.0397276	-0.00951287	0.0123646	0.00571179	-0.00454415	0.00111402	0.00369951	-0.00268344	0.000521233		0	0	0.95695	0.614116	0.543733	0.193746	0.572812	0.575487	0.684627	0.655327
0.0759814	-0.0237368	-0.0171897	0.0176167	0.00827592	0.0134194	-0.0229154	0.00377875	0.00793217	8.94188e-05		0	0.136255	0.595442	0.101091	0.730028	0.00306561	0.262586	0.507944	0.407441	0.941808
0.0546193	-0.0265331	0.0139326	0.0176167	0.0186844	0.0116596	-0.0219744	-0.00638491	0.00829288	0.00546036		0	0.100308	0.0112283	0	0.00482093	0.0141018	0.327655	0	0.158923	0.0107431
0.0546193	-0.0265331	0.0139326	0.0176167	0.0186844	0.0126933	-0.0219744	-0.00638491	0.00829288	0.00546036		0	0.115714	0	0.0734684	0.00137742	0.000613136	0.325032	0.343648	0.301134	0
0.0804827	0.0415259	-0.0168217	0.0210401	0.00166316	-0.00431555	0.0150377	0.00625266	-0.00415934	-0.0196674		0	0.0136939	0.659672	0.96604	0.748623	0.222563	0.999907	0.995536	0.886779	0.997314
-0.110901	-0.0128381	-0.0459985	0.0205432	0.00768751	0.012149	0.00111402	0.00521664	0.000217051	-0.00607212		1	0.108182	0.611275	0.0964747	0.729339	0	0.441782	0.557036	0.617545	0.948075
-0.108804	-0.0130563	-0.0459985	0.0213728	0.0078172	0.0113067	0.00111402	-0.0139921	-0.00147382	-0.0110223		1	0.114344	0.607335	0.150767	0.730028	0.00306561	0.468184	0.069398	0.735676	0.948075
-0.100783	-0.137563	-0.0579948	-0.0503493	-0.0263111	-0.00352069	0.0275408	0.00553704	0.00360164	0.00116217		1	1	0.753607	1	1	1	0.914333	0.918372	0.92037	0.704566
-0.0789961	-0.0138873	0.0415974	0.0181469	0.0163168	0.010273	-0.0302575	-0.00681355	0.00595943	0.00546036		1	0.100308	4.27582e-05	0.0636062	0	0.0141018	0	0.36638	0	0.00447628
-0.116963	0.0375381	-0.0456305	0.0215704	0.00107475	-0.00570214	0.0150377	0.00730384	-0.00182062	-0.0196674		1	0.00616228	0.682647	0.962903	0.746556	0.18271	0.98864	1	0.899468	1
-0.116963	0.0387085	-0.0456305	0.0215704	0.00107475	-0.00570214	0.0150377	0.00730384	-0.00275198	-0.0196674		1	0.0102705	0.681344	0.969093	0.746556	0.189454	1	0.996555	0.972404	0.998209
0.076302	-0.0255107	-0.0171897	0.0176167	0.0177237	0.0116596	-0.0219744	-0.00638491	0.00822204	0.00224164		0	0.100308	0.604036	0.239201	0.488062	0.0141018	0.344008	0.354993	0.394636	0.633542
0.076302	-0.0255107	-0.0171897	0.0176167	0.0177237	0.0126933	-0.0219744	-0.00638491	0.00822204	0.00224164		0	0.114002	0.596246	0.286131	0.487144	0.00367872	0.351934	0.306997	0.481417	0.629961
0.0809435	0.0352315	-0.00951287	0.0133236	-0.0148077	-0.00431555	0.00257671	0.00867613	-0.00297331	-0.00124692		0	0.0126669	0.985365	0.978267	0.826217	0.224402	0.725609	0.807284	0.738197	0.881229
0.0546193	-0.0265331	0.0139326	0.0176167	0.0145516	0.0116596	-0.0302575	-0.00638491	0.00829288	0.00546036		0	0.100308	0.0372856	0.18661	0.00206609	0.0141018	0.217562	0.236676	0.153352	0.00507311
0.0815475	0.0394173	-0.0168217	0.0202201	0.00602219	-0.00454415	0.00587228	0.00381649	-0.00268344	0.000521233		0	0	0.686288	0.876568	0.5	0.193746	0.772068	0.665179	0.64839	0.669352
0.0809435	0.0307945	-0.0168217	0.0210401	0.00633446	-0.00431555	0.00587228	0.00442049	-0.00268344	0.000585246		0	0.0102705	0.676974	0.88103	0.498852	0.189454	0.77498	0.778579	0.720106	0.665175
-0.110901	-0.0128649	-0.0459985	0.0181469	0.0171353	0.010273	-0.0219744	-0.00681355	0.00588859	0.00224164		1	0.100308	0.60101	0.282243	0.486455	0.0141018	0.303322	0.330938	0.451074	0.633542
-0.117631	0.0314827	-0.0383217	0.0138538	-0.0153961	-0.00570214	0.00257671	0.00972731	-0.00176369	-0.00124692		1	0.00616228	1	0.977518	0.825298	0.18271	0.781585	0.825136	0.812461	0.884214
-0.118507	0.0314827	-0.0383217	0.0138538	-0.0153961	-0.00570214	0.00276911	0.00764349	-0.00115237	-0.00124692		1	0.00924341	0.997462	0.975021	0.825528	0.191294	0.794172	0.661442	0.87615	0.883617
-0.119728	0.0356685	-0.0456305	0.0207503	0.00543378	-0.00593073	0.00587228	0.00547167	0.000623103	0.000521233		1	0	0.692511	0.876713	0.497704	0.193746	0.66288	0.787645	0.623957	0.667562
0.06409	-0.0254329	0.00122087	0.0176167	0.0186844	0.0116596	-0.0219744	-0.00638491	0.00829288	0.00224164		0	0.100308	0.54207	0.358696	0.365932	0.0141018	0.304207	0.307401	0.37012	0.47553
0.0815475	0.0397276	-0.00951287	0.0129112	0.00571179	-0.00454415	0.00587228	0.00381649	-0.00268344	0.000521233		0	0	0.979971	0.893953	0.659894	0.193746	0.655817	0.663148	0.648421	0.767084
0.0815475	0.0306031	-0.00951287	0.0137313	0.00552226	-0.00431555	0.00587228	0.00381649	-0.00268344	0.000585246		0	0.00924341	0.974121	0.883949	0.659435	0.191294	0.661674	0.638575	0.703967	0.764996
0.0816336	0.0394758	-0.0168217	0.0196735	0.0117112	-0.00454415	0.00205501	0.00262772	0.00824412	0.000521233		0	0	0.659625	0.614606	0.374656	0.193746	0.606872	0.61702	0.536451	0.501791
-0.118507	0.0359789	-0.0383217	0.0128948	0.00512338	-0.00593073	0.00111402	0.00338785	-0.00147382	0.000521233		1	0	0.987782	0.881443	0.658747	0.193746	0.63549	0.65129	0.690911	0.767234
0.0829937	0.0397276	-0.00951287	0.0123646	0.00571179	-0.00454415	0.00111402	0.00369951	0.00824412	0.000521233		0	0	0.95695	0.614116	0.543733	0.193746	0.572812	0.575487	0.589974	0.655327
0.070806	-0.196884	-0.0110259	0.00691028	-0.0379135	0.0135356	-0.00564325	0.00329246	0.00291251	0.00147949		0	1	0.965815	0.441388	0.978947	0	0.648562	0.632209	0.868518	0.8
0.043413	-0.100689	0.0152155	0.0168828	0.0256038	0.0128094	0.00205501	-0.00638491	0.00819878	0.00684902		0	0.689076	0.0609618	0.011798	0.0105263	0	0.480441	0.140579	0.563669	0
0.0423506	-0.0893978	0.0152155	0.0168828	0.0256038	-0.00444176	0.00205501	-0.00571859	0.00831496	0.00684902		0	0.729412	0.12417	0.0300305	0.0666667	1	0.484587	0.159195	0.58618	0.034375
0.0556137	0.0287762	0.0120444	0.0210401	0.00816433	-0.00845901	0.0159787	0.00251074	-0.00408851	0.00348665		0	0.00504201	0.196555	0.988392	0.0666667	0.413333	1	0.541681	0.887155	0.2375
-0.0910106	-0.0817082	-0.0399881	0.00886689	-0.0385019	0.012149	-0.00218155	0.00765219	-0.00254812	0.00127609		1	0.689076	0.990927	0.440233	0.978947	0	0.64174	0.989537	0.887381	0.8625
-0.0894701	-0.0700587	-0.0399881	0.00886689	-0.0385019	-0.00352069	-0.00218155	0.0072971	-0.00243194	0.00127609		1	0.801681	1	0.419296	1	0.426667	0.640953	1	0.88821	0.834375
-0.0844155	0.0109566	0.0391466	0.0201852	-0.015472	0.0147083	0.0235285	-0.0174176	-0.0192279	-0.0454051		1	0.0537815	0.14159	0.995663	0.978947	0.0266667	0.90028	0.013626	0.998491	1
-0.0627468	-0.0665418	0.0428803	0.0141871	0.0232362	0.011052	-0.0302575	-0.00681355	0.00386269	0.00640792		1	0.689076	0	0	0.0140351	0	0	0	0.138446	0.003125
-0.0806952	0.0336503	0.0397091	0.0207503	0.0103972	-0.00747125	0.0187155	0.00428291	-0.00169285	0.00373995		1	0	0.215994	0.986815	0	0.453333	0.878566	0.697212	0.718013	0.18125
-0.0806952	0.0336503	0.0397091	0.0207503	0.00961729	-0.00747125	0.0159787	0.00428291	-0.00108153	0.00342263		1	0	0.222605	0.98809	0.0701754	0.453333	0.94827	0.698655	0.781484	0.240625
0.0636495	-0.104614	-0.0184882	0.0160532	0.0151953	0.0135356	0.00111402	0.00417157	-0.00308949	0.00127609		0	0.689076	0.920566	0.770406	0.65614	0	0.590248	0.587441	0.773189	0.554167
0.0625871	-0.0933222	-0.0111793	0.00874432	0.0151953	-0.00473705	0.00111402	0.00381649	-0.00297331	0.00127609		0	0.729412	0.958586	0.756747	0.681871	1	0.591367	0.597135	0.780969	0.55625
0.0807626	0.022335	-0.027673	-0.0679086	0.00139152	-0.00816372	0.00772173	-0.0102242	-0.00444922	0.000587982		0	0.00504201	0.833776	0.998668	0.674854	0.413333	0.849614	0.395839	0.918055	0.679167
0.043413	-0.101047	0.0152155	0.0136569	0.0256038	0.0128094	-0.0219744	-0.00638491	0.0081767	0.00684902		0	0.689076	0.111479	0.521971	0.0304094	0	0.321676	0.0999245	0.429432	0.0125
0.0560746	0.0338358	0.00857498	-0.0114988	0.0152171	-0.00839231	0.0051663	-0.00763532	-0.0026126	0.00406001		0	0	0.328956	0.996154	0.025731	0.453333	0.786336	0.459824	0.722946	0.139583
0.0560746	0.0351273	0.00857498	-0.0114988	0.0144372	-0.00839231	0.0051663	-0.00763532	-0.00229115	0.0038668		0	0	0.373945	0.996217	0.0678363	0.453333	0.810952	0.46651	0.751606	0.170833
-0.0941867	-0.0645123	-0.047297	0.0165834	0.0146069	0.012149	0.00111402	0.00374293	0.000217051	0.00127609		1	0.689076	0.902569	0.756494	0.664327	0	0.427564	0.663179	0.638012	0.566667
-0.118037	0.033577	-0.0564818	-0.062918	0.00472206	-0.00747125	0.00194868	0.00421535	-0.00176369	0.000521233		1	0	0.851529	0.998666	0.652632	0.453333	0.806862	0.566792	0.867962	0.68125
-0.117369	0.0302689	-0.0491	-0.0371117	0.00472206	-0.00747125	0.00481539	0.00421535	-0.00211049	0.000521233		1	0	0.871889	0.998548	0.683041	0.453333	0.829834	0.57076	0.889395	0.691667
-0.0868778	0.0322171	0.0362397	0.0020856	0.0173837	-0.00717596	0.000610555	-0.00806395	0.0059815	0.00406001		1	0	0.292114	0.995976	0.0280702	0.453333	0.608945	0.465289	0.545981	0.141667
0.0636495	-0.104532	-0.0184882	0.0168828	0.0161372	0.0128094	0.00111402	-0.00897376	-0.00308949	0.00297657		0	0.689076	0.861045	0.899965	0.508187	0	0.482714	0.48692	0.655401	0.422396
0.0812235	0.0370153	-0.027673	-0.0636708	0.00547913	-0.00868761	0.00175628	0.000120114	-0.00297331	0.000521233		0	0	0.858875	0.999667	0.502339	0.453333	0.758265	0.502474	0.820538	0.513542
0.0812235	0.0370153	-0.027673	-0.0636708	0.00547913	-0.00868761	0.00175628	0.000120114	-0.00297331	0.000521233		0	0	0.88689	0.999619	0.526901	0.453333	0.770442	0.507561	0.835006	0.524479
0.0604728	0.0340775	0.00119314	-0.061565	0.0152171	-0.00839231	0.000591457	-0.00763532	0.00302739	0.00406001		0	0	0.305596	0.998718	0.0380117	0.453333	0.631977	0.372887	0.612491	0.116146
-0.118037	0.0333251	-0.0564818	-0.062918	0.00503246	-0.00747125	0.00175628	0.00421535	-0.00176369	0.000521233		1	0	0.845537	0.999618	0.507018	0.453333	0.668301	0.566505	0.735338	0.520312
0.0802628	0.0369055	-0.027673	-0.0636708	0.0152171	-0.00839231	0.00269728	-0.00763532	-0.00297331	0.00222171		0	0	0.829326	1	0.416491	0.453333	0.66234	0.487269	0.731755	0.419375
0.070806	-0.196884	-0.0110259	0.00691028	-0.0379135	0.0135356	-0.00564325	0.00329246	0.00262264	0.00147949		0	1	0.965815	0.441388	0.978947	0	0.648562	0.632209	0.85708	0.8
0.043413	-0.101047	0.0152155	0.0168828	0.0256038	0.0128094	0.00205501	-0.00638491	0.00819878	0.00684902		0	0.689076	0.0609618	0.011798	0.0105263	0	0.480441	0.140579	0.480885	0
0.0423506	-0.0893978	0.0152155	0.0168828	0.0256038	-0.00444176	0.00205501	-0.00571859	0.00831496	0.00684902		0	0.729412	0.12417	0.0300305	0.0666667	1	0.484587	0.159195	0.517167	0.034375
0.0560746	0.0287762	0.0120444	0.0210401	0.00816433	-0.00845901	0.0159787	0.00251074	-0.00229115	0.00348665		0	0.00504201	0.196555	0.988392	0.0666667	0.413333	1	0.541681	0.873881	0.2375
-0.0916789	-0.0813502	-0.0399881	0.00886689	-0.0385019	0.012149	-0.00218155	0.00765219	-0.00187987	0.00127609		1	0.689076	0.990927	0.440233	0.978947	0	0.64174	0.989537	0.864231	0.8625
-0.0901383	-0.0700587	-0.0399881	0.00886689	-0.0385019	-0.00352069	-0.00218155	0.0072971	-0.00176369	0.00127609		1	0.801681	1	0.419296	1	0.426667	0.640953	1	0.871186	0.834375
-0.0844155	0.0109566	0.0391466	0.0201852	-0.015472	0.0147083	0.0235285	-0.0174176	-0.0192279	-0.0454051		1	0.0537815	0.14159	0.995663	0.978947	0.0266667	0.90028	0.013626	1	1
-0.0627468	-0.0609459	0.0428803	0.0141871	0.0232362	0.0114229	-0.0302575	-0.00681355	0.00584325	0.00684902		1	0.689076	0	0	0.0140351	0	0	0	0	0.003125
-0.0806952	0.0336503	0.0397091	0.0207503	0.0103972	-0.00747125	0.0187155	0.00428291	-0.00169285	0.00373995		1	0	0.215994	0.986815	0	0.453333	0.878566	0.697212	0.681973	0.18125
-0.0806952	0.0336503	0.0397091	0.0207503	0.00961729	-0.00747125	0.0159787	0.00428291	-0.0013714	0.00342263		1	0	0.222605	0.98809	0.0701754	0.453333	0.94827	0.698655	0.754336	0.240625
0.0636495	-0.104614	-0.0184882	0.0160532	0.0151953	0.0135356	0.00111402	0.00417157	-0.00308949	0.00127609		0	0.689076	0.920566	0.770406	0.65614	0	0.590248	0.587441	0.734066	0.554167
0.0625871	-0.0933222	-0.0111793	0.00874432	0.0151953	-0.00473705	0.00111402	0.00381649	-0.00297331	0.00127609		0	0.729412	0.958586	0.756747	0.681871	1	0.591367	0.597135	0.748478	0.55625
0.0807626	0.022335	-0.027673	-0.0679086	0.00139152	-0.00816372	0.00772173	-0.0102242	-0.00444922	0.000587982		0	0.00504201	0.833776	0.998668	0.674854	0.413333	0.849614	0.395839	0.910321	0.679167
0.043413	-0.101047	0.0152155	0.0136569	0.0256038	0.0128094	-0.0219744	-0.00638491	0.0081767	0.00684902		0	0.689076	0.111479	0.521971	0.0304094	0	0.321676	0.0999245	0.332684	0.0125
0.0560746	0.0338358	0.00857498	-0.0114988	0.0152171	-0.00839231	0.0051663	-0.00763532	-0.0026126	0.00406001		0	0	0.328956	0.996154	0.025731	0.453333	0.786336	0.459824	0.678913	0.139583
0.0560746	0.0351273	0.00857498	-0.0114988	0.0144372	-0.00839231	0.0051663	-0.00763532	-0.00229115	0.0038668		0	0	0.373945	0.996217	0.0678363	0.453333	0.810952	0.46651	0.715128	0.170833
-0.0941867	-0.0645123	-0.047297	0.0165834	0.0146069	0.012149	0.00111402	0.00374293	0.00550461	0.00127609		1	0.689076	0.902569	0.756494	0.664327	0	0.427564	0.663179	0.578472	0.566667
-0.118037	0.033577	-0.0564818	-0.062918	0.00472206	-0.00747125	0.00194868	0.00421535	-0.00176369	0.000521233		1	0	0.851529	0.998666	0.652632	0.453333	0.806862	0.566792	0.848735	0.68125
-0.118037	0.0302689	-0.0491	-0.0371117	0.00472206	-0.00747125	0.00481539	0.00421535	-0.00144224	0.000521233		1	0	0.871889	0.998548	0.683041	0.453333	0.829834	0.57076	0.875174	0.691667
-0.0868778	0.0325014	0.0362397	0.0020856	0.0173837	-0.00717596	0.000610555	-0.00806395	0.0059815	0.00406001		1	0	0.292114	0.995976	0.0280702	0.453333	0.608945	0.465289	0.47877	0.141667
0.0650956	-0.104532	-0.0184882	0.0168828	0.0161372	0.0128094	0.00111402	-0.00897376	0.00783806	0.00297657		0	0.689076	0.861045	0.899965	0.508187	0	0.482714	0.48692	0.598425	0.422396
0.0812235	0.0370153	-0.027673	-0.0636708	0.00547913	-0.00868761	0.00175628	0.000120114	-0.00297331	0.000521233		0	0	0.858875	0.999667	0.502339	0.453333	0.758265	0.502474	0.793009	0.513542
0.0812235	0.0370153	-0.027673	-0.0636708	0.00547913	-0.00868761	0.00175628	0.000120114	-0.00297331	0.000521233		0	0	0.88689	0.999619	0.526901	0.453333	0.770442	0.507561	0.812275	0.524479
0.0604728	0.0340775	0.00119314	-0.061565	0.0152171	-0.00839231	0.000591457	-0.00763532	0.00831496	0.00406001		0	0	0.305596	0.998718	0.0380117	0.453333	0.631977	0.372887	0.551374	0.116146
-0.118037	0.0333251	-0.0564818	-0.062918	0.00503246	-0.00747125	0.00175628	0.00421535	-0.00176369	0.000521233		1	0	0.845537	0.999618	0.507018	0.453333	0.668301	0.566505	0.695288	0.520312
0.0802628	0.0369055	-0.027673	-0.0636708	0.0152171	-0.00839231	0.00269728	-0.00763532	-0.00297331	0.00222171		0	0	0.829326	1	0.416491	0.453333	0.66234	0.487269	0.690074	0.419375
0.0748559	-0.0237368	-0.00988085	0.0127041	0.00827592	0.0135356	0.00111402	0.00476961	-0.00308949	0.00192158		0	0.193548	0.953751	0.284916	0.771739	0	0.495863	0.654897	0.786034	0.871859
0.0546193	-0.0261751	0.0139326	0.0176167	0.0186844	0.0128094	-0.0219744	-0.00638491	0.0081767	0.00546036		0	0.132033	0.0844908	0.00348488	0.0130435	0	0.37043	0.304932	0.531744	0.0150754
0.0546193	-0.0244279	0.0139326	0.0176167	0.0186844	0.0116596	-0.0219744	-0.00638491	0.00829288	0.00546036		0	0.134284	0.101995	0.00888315	0.0173913	0.0249433	0.366144	0.393604	0.581708	0.0201005
0.0563698	0.0260907	0.0120444	0.0206325	-0.00428519	-0.00633215	0.023632	0.00807809	-0.00530975	-0.00289561		0	0.0285071	0.383078	0.992458	0.843478	0.498866	1	0.956909	0.985309	0.984925
-0.107928	-0.0128381	-0.0386896	0.0132343	0.00768751	0.012149	0.00111402	0.00825696	-0.00187987	8.94188e-05		1	0.132033	0.962831	0.307722	0.771739	0	0.515855	0.788975	0.855855	0.89196
-0.108804	-0.0110909	-0.0386896	0.0132343	0.00768751	0.0120328	0.00111402	0.00617314	-0.00176369	8.94188e-05		1	0.140285	0.97174	0.269392	0.771739	0.00680273	0.518616	0.605173	0.876695	0.886935
-0.0682354	-0.126972	0.036932	-0.0221809	-0.0314323	-0.0032254	0.0298174	-0.00900313	0.00396235	0.00148222		1	1	0.326042	0.998193	1	1	0.896552	0	0.932058	0.469849
-0.0789961	-0.0138873	0.0415974	0.0181469	0.0163168	0.0114229	-0.0302575	-0.00681355	0.00584325	0.00546036		1	0.132033	0	0	0	0	0	0.349675	0.180782	0
-0.0819992	0.0522242	0.0397091	0.0203427	-0.00416408	-0.00747125	0.023632	0.00912927	-0.00297102	-0.0188789		1	0	0.390227	0.990594	0.841304	0.399093	0.940119	1	0.973912	1
-0.0819992	0.0524632	0.0384543	0.0203427	-0.00416408	-0.00814387	0.0235285	0.00912927	-0.0192279	-0.0164224		1	0.00375094	0.393322	0.992696	0.841304	0.419501	0.958969	0.979456	1	0.994975
0.0748559	-0.0252926	-0.0171897	0.020013	0.00908811	0.0135356	0.00111402	0.00417157	-0.00308949	0.00192158		0	0.132033	0.859882	0.511268	0.518841	0	0.460716	0.582934	0.724545	0.592965
0.0748559	-0.0235454	-0.0171897	0.020013	0.00908811	0.0123857	0.00111402	0.00405459	-0.00297331	0.00192158		0	0.134284	0.872192	0.477025	0.52029	0.0249433	0.460208	0.551225	0.748146	0.592965
0.0807626	0.0243787	0.0120263	-0.0396534	-0.0196566	-0.00633215	-0.00134689	0.00646941	-0.0044808	0.00192158		0	0.0285071	0.94055	0.999319	0.871739	0.498866	0.797472	0.537268	0.901134	0.775544
0.0546193	-0.0265331	0.0139326	0.0176167	0.0145516	0.0128094	-0.0302575	-0.00638491	0.0081767	0.00546036		0	0.132033	0.0914462	0.231367	0.0101449	0	0.245525	0.349404	0.431411	0.0117253
0.0568307	0.0362332	0.00857498	-0.00946715	0.00531047	-0.00868761	0.0040329	0.00536497	-0.00290247	0.000521233		0	0	0.451472	0.996589	0.565942	0.399093	0.770183	0.753947	0.830322	0.666667
0.057569	0.0353857	0.00857498	-0.0168232	0.00531047	-0.00868761	0.0040329	0.00536497	-0.00290247	0.000521233		0	0	0.46379	0.997106	0.567391	0.430839	0.775038	0.776656	0.855672	0.666667
-0.110436	-0.0126467	-0.0459985	0.0173173	0.0084997	0.012149	-0.0229154	0.00374293	0.000194974	0.00192158		1	0.132033	0.816513	0.500702	0.514493	0	0.344824	0.581274	0.637777	0.592965
-0.117369	0.0436826	-0.0167824	-0.0366944	-0.0195355	-0.00747125	-0.00134689	0.00615775	-0.00243194	0.000521233		1	0	0.945667	0.999323	0.871014	0.399093	0.784175	0.596325	0.920609	0.78727
-0.117369	0.0436826	-0.0167824	-0.0366944	-0.0195355	-0.00747125	-0.00134689	0.00591396	-0.00211049	0.000521233		1	0.00375094	0.954127	0.999301	0.871014	0.419501	0.791379	0.52821	0.936251	0.78392
-0.083738	0.0312262	0.0362397	-0.017843	0.00472206	-0.00747125	-0.000330441	0.00641615	-0.00169285	0.000521233		1	0	0.407167	0.99675	0.56087	0.399093	0.633029	0.776377	0.718231	0.664992
0.0753414	-0.0252926	-0.0171897	0.0176167	0.0147771	0.0135356	-0.0219744	0.00190944	0.0028183	0.00192158		0	0.132033	0.776211	0.656557	0.390942	0	0.377818	0.516209	0.63547	0.447655
0.0812235	0.0373257	0.0120263	-0.0365576	0.00531047	-0.00868761	0.00175628	0.00476096	-0.00297331	0.000521233		0	0	0.987563	0.99977	0.706884	0.399093	0.703137	0.617619	0.844152	0.705611
0.0812235	0.0373257	0.0120263	-0.0365576	0.00531047	-0.00868761	0.00175628	0.00476096	-0.00297331	0.000521233		0	0	1	0.999764	0.707609	0.430839	0.706024	0.59834	0.860301	0.704774
0.0572124	0.0335051	0.00857498	-0.0359847	0.0113098	-0.00868761	0.000610555	0.00357219	-0.0026126	0.000521233		0	0	0.466636	0.998531	0.426087	0.399093	0.605944	0.664096	0.708909	0.502513
-0.118037	0.033577	-0.0167824	-0.0357306	0.00472206	-0.00747125	-0.000349539	0.00433232	-0.00176369	0.000521233		1	0	0.96571	0.999771	0.704348	0.399093	0.638352	0.620547	0.803217	0.707286
0.0812235	0.0373257	0.0120263	-0.0344518	0.00531047	-0.00868761	-0.000349539	0.00476096	-0.00297331	0.000521233		0	0	0.997473	1	0.587174	0.399093	0.606255	0.603362	0.77041	0.613568
0.076302	-0.0237368	-0.00988085	0.0127041	0.00827592	0.0135356	0.00111402	0.00476961	0.0025505	0.00192158		0	0.193548	0.953751	0.284916	0.771739	0	0.495863	0.654897	0.630625	0.871859
0.0546193	-0.0265331	0.0139326	0.0176167	0.0186844	0.0128094	-0.0219744	-0.00638491	0.0081767	0.00546036		0	0.132033	0.0844908	0.00348488	0.0130435	0	0.37043	0.304932	0.386786	0.0150754
0.0546193	-0.0247859	0.0139326	0.0176167	0.0186844	0.0116596	-0.0219744	-0.00638491	0.00829288	0.00546036		0	0.134284	0.101995	0.00888315	0.0173913	0.0249433	0.366144	0.393604	0.440006	0.0201005
0.0563698	0.0251593	0.0120444	0.0206325	-0.00428519	-0.00633215	0.023632	0.00807809	-0.00437838	-0.00289561		0	0.0285071	0.383078	0.992458	0.843478	0.498866	1	0.956909	0.944762	0.984925
-0.107928	-0.0128381	-0.0386896	0.0132343	0.00768751	0.012149	0.00111402	0.00825696	-0.00187987	8.94188e-05		1	0.132033	0.962831	0.307722	0.771739	0	0.515855	0.788975	0.713947	0.89196
-0.108804	-0.0110909	-0.0386896	0.0132343	0.00768751	0.0120328	0.00111402	0.00617314	-0.00176369	8.94188e-05		1	0.140285	0.97174	0.269392	0.771739	0.00680273	0.518616	0.605173	0.732515	0.886935
-0.0689036	-0.126972	0.036932	-0.0221809	-0.0314323	-0.0032254	0.0298174	-0.00900313	0.0046306	0.00148222		1	1	0.326042	0.998193	1	1	0.896552	0	0.858605	0.469849
-0.0789961	-0.00855785	0.0415974	0.0181469	0.0163168	0.011052	-0.0302575	-0.00681355	0.00386269	0.00501926		1	0.132033	0	0	0	0	0	0.349675	0	0
-0.0819992	0.0512928	0.0397091	0.0203427	-0.00416408	-0.00747125	0.023632	0.00912927	-0.00203965	-0.0188789		1	0	0.390227	0.990594	0.841304	0.399093	0.940119	1	0.926691	1
-0.0819992	0.0515318	0.0397091	0.0203427	-0.00416408	-0.00747125	0.023632	0.00912927	-0.00203965	-0.0164224		1	0.00375094	0.393322	0.992696	0.841304	0.419501	0.958969	0.979456	0.944491	0.994975
0.076302	-0.0252926	-0.0171897	0.020013	0.00908811	0.0135356	0.00111402	0.00417157	0.00783806	0.00192158		0	0.132033	0.859882	0.511268	0.518841	0	0.460716	0.582934	0.577119	0.592965
0.076302	-0.0235454	-0.0171897	0.020013	0.00908811	0.0123857	0.00111402	0.00405459	0.00795425	0.00192158		0	0.134284	0.872192	0.477025	0.52029	0.0249433	0.460208	0.551225	0.601049	0.592965
0.0812235	0.0243787	0.0120263	-0.0396534	-0.0196566	-0.00633215	-0.00134689	0.00646941	-0.00297331	0.00192158		0	0.0285071	0.94055	0.999319	0.871739	0.498866	0.797472	0.537268	0.81133	0.775544
0.0546193	-0.0265331	0.0139326	0.0176167	0.0145516	0.0128094	-0.0302575	-0.00638491	0.0081767	0.00546036		0	0.132033	0.0914462	0.231367	0.0101449	0	0.245525	0.349404	0.275598	0.0117253
0.0568307	0.0362332	0.00857498	-0.00946715	0.00531047	-0.00868761	0.0040329	0.00536497	-0.00290247	0.000521233		0	0	0.451472	0.996589	0.565942	0.399093	0.770183	0.753947	0.752747	0.666667
0.057569	0.0353857	0.00857498	-0.0168232	0.00531047	-0.00868761	0.0040329	0.00536497	-0.00290247	0.000521233		0	0	0.46379	0.997106	0.567391	0.430839	0.775038	0.776656	0.77642	0.666667
-0.110436	-0.0126467	-0.0459985	0.0173173	0.0084997	0.012149	-0.0229154	0.00374293	0.00548254	0.00192158		1	0.132033	0.816513	0.500702	0.514493	0	0.344824	0.581274	0.482154	0.592965
-0.118037	0.0436826	-0.0167824	-0.0366944	-0.0195355	-0.00747125	-0.00134689	0.00615775	-0.00176369	0.000521233		1	0	0.945667	0.999323	0.871014	0.399093	0.784175	0.596325	0.833081	0.78727
-0.118037	0.0436826	-0.0167824	-0.0366944	-0.0195355	-0.00747125	-0.00134689	0.00591396	-0.00144224	0.000521233		1	0.00375094	0.954127	0.999301	0.871014	0.419501	0.791379	0.52821	0.845203	0.78392
-0.085835	0.0312262	0.0362397	-0.017843	0.00472206	-0.00747125	-0.000330441	0.00641615	0.000404069	0.000521233		1	0	0.407167	0.99675	0.56087	0.399093	0.633029	0.776377	0.623727	0.664992
0.0753414	-0.0252926	-0.0171897	0.0176167	0.0147771	0.0135356	-0.0219744	0.00190944	0.00810586	0.00192158		0	0.132033	0.776211	0.656557	0.390942	0	0.377818	0.516209	0.48398	0.447655
0.0812235	0.0373257	0.0120263	-0.0365576	0.00531047	-0.00868761	0.00175628	0.00476096	-0.00297331	0.000521233		0	0	0.987563	0.99977	0.706884	0.399093	0.703137	0.617619	0.743569	0.705611
0.0812235	0.0373257	0.0120263	-0.0365576	0.00531047	-0.00868761	0.00175628	0.00476096	-0.00297331	0.000521233		0	0	1	0.999764	0.707609	0.430839	0.706024	0.59834	0.758501	0.704774
0.0586585	0.0335051	0.00857498	-0.0359847	0.0113098	-0.00868761	0.000610555	0.00357219	0.00273752	0.000521233		0	0	0.466636	0.998531	0.426087	0.399093	0.605944	0.664096	0.607123	0.502513
-0.118037	0.033577	-0.0167824	-0.0357306	0.00472206	-0.00747125	-0.000349539	0.00433232	-0.00176369	0.000521233		1	0	0.96571	0.999771	0.704348	0.399093	0.638352	0.620547	0.696041	0.707286
0.0812235	0.0373257	0.0120263	-0.0344518	0.00531047	-0.00868761	-0.000349539	0.00476096	-0.00297331	0.000521233		0	0	0.997473	1	0.587174	0.399093	0.606255	0.603362	0.657843	0.613568
0.0740744	-0.0780079	-0.0111793	0.00594037	-0.0430347	0.0126933	-0.026211	-0.0169889	-0.00479275	-0.0116678		0	0.527372	0.969033	0.257351	0.98538	0.00447028	0.378494	0	0.900164	0.960357
0.0546193	-0.0566693	0.0152155	0.0168828	0.0256038	0.0128094	0.00205501	-0.00638491	0.00819878	0.00684902		0	0.368841	0.112227	0	0.0419103	0	0.552011	0.392823	0.515708	0.0426165
0.0546193	-0.0564511	0.0152155	0.0168828	0.0219788	0.0123857	0.00205501	0.00162717	0.00831496	0.00652896		0	0.374772	0.129039	0.0269119	0.042885	0.0406795	0.563511	0.503536	0.535123	0.0436075
0.058137	0.0296424	0.0120444	0.0210401	0.00816433	-0.00845901	0.0159787	0.00323173	-0.00408851	0.00164834		0	0.0193887	0.289672	0.993634	0.356725	1	1	0.815315	0.92785	0.443013
-0.108136	-0.0756357	-0.0399881	0.00886689	-0.0385019	0.012149	-0.00218155	0.00799857	-0.00254812	-0.0473797		1	0.368841	0.982028	0.251642	0.983431	0	0.571082	0.684385	0.894742	1
-0.108136	-0.0756357	-0.0399881	0.00886689	-0.0385019	0.0120328	-0.00218155	0.00600511	-0.00243194	-0.0473797		1	0.39188	0.989188	0.247609	0.983431	0.00715243	0.576844	0.535883	0.905435	0.999009
-0.0682354	-0.159934	0.0282954	-0.052381	-0.040243	-0.00389802	-0.0074417	-0.0101548	-0.0316455	0.00148222		1	1	0.219625	0.999208	1	0.343317	0.821234	0.123195	1	0.793855
-0.0789961	-0.0443815	0.0428803	0.0141871	0.0232362	0.0114229	-0.0302575	-0.00681355	0.00584325	0.00684902		1	0.368841	0	0.00633482	0	0	0	0.48753	0.0547334	0
-0.0852299	0.036383	0.0397091	0.0207503	0.00961729	-0.00747125	0.0159787	0.00428291	-0.00108153	0.00158433		1	0	0.296227	0.992901	0.324561	0.722843	0.965214	1	0.857891	0.421209
-0.0852299	0.0257132	0.0397091	0.0215704	0.00992956	-0.00724265	0.0159787	0.00428291	-0.00108153	0.00164834		1	0.00661496	0.299058	0.993298	0.324561	0.762181	0.99232	0.997137	0.880185	0.420218
0.0748559	-0.0608119	-0.0184882	0.0168828	0.015325	0.0128094	0.00111402	-0.00897376	-0.00308949	0.00159615		0	0.368841	0.918524	0.353375	0.67024	0	0.500529	0.359069	0.770205	0.667658
0.0748559	-0.0608119	-0.0184882	0.0168828	0.015325	0.0116596	0.00111402	-0.00897376	-0.00297331	0.00159615		0	0.374772	0.927923	0.336689	0.670565	0.0406795	0.506283	0.346473	0.780241	0.667658
0.0807626	0.0229251	-0.027673	-0.0679086	0.00525063	-0.00816372	0.00175628	-0.0102242	-0.00477067	0.000905302		0	0.0193887	0.880436	0.999638	0.780702	1	0.733243	0.312837	0.942671	0.732408
0.0546193	-0.0570273	0.0152155	0.0136569	0.0256038	0.0128094	-0.0219744	-0.00638491	0.0081767	0.00684902		0	0.368841	0.115064	0.133113	0.0282651	0	0.371841	0.461297	0.368522	0.0287413
0.0581984	0.0368024	0.00857498	-0.00946715	0.00823069	-0.00868761	0.00963432	0.0041762	-0.0026126	0.00373995		0	0	0.424178	0.996154	0.241066	0.722843	0.839075	0.736046	0.76715	0.302279
0.0581984	0.0389325	0.00857498	0.00373871	0.00863201	-0.00868761	0.00963432	0.0041762	-0.0026126	0.00373995		0	0.000456211	0.435187	0.996111	0.241391	0.774251	0.851944	0.771996	0.781053	0.302279
-0.110436	-0.0479478	-0.047297	0.0133576	0.0146069	0.012149	-0.0229154	0.00362596	0.000194974	0.00127609		1	0.368841	0.857339	0.334518	0.655621	0	0.382642	0.569266	0.618304	0.666336
-0.117369	0.033577	-0.0564818	-0.062918	0.00472206	-0.00747125	0.00194868	0.00433232	-0.00243194	0.000521233		1	0	0.88839	0.999646	0.769331	0.722843	0.785843	0.602527	0.917544	0.738355
-0.117369	0.0193945	-0.0564818	-0.0671558	0.00375258	-0.00724265	-0.000580961	0.00421535	-0.00211049	0.000267926		1	0.00661496	0.891729	0.999538	0.769331	0.762181	0.7968	0.552072	0.92854	0.737694
-0.0867476	0.0357738	0.0397091	0.0189433	0.0134764	-0.00747125	0.00681327	0.00428291	0.0059815	0.00373995		1	0	0.363455	0.99588	0.216374	0.722843	0.652511	0.828222	0.597603	0.280476
0.076302	-0.0606205	-0.0184882	0.0168828	0.0161372	0.0128094	0.00111402	-0.00897376	0.0025505	0.00159615		0	0.368841	0.837667	0.409006	0.506173	0	0.440324	0.434026	0.634318	0.507598
0.0812235	0.0373257	0.0120263	-0.0385892	0.00516873	-0.00868761	0.00175628	0.000120114	-0.00297331	0.000521233		0	0	0.97377	0.999899	0.615335	0.722843	0.714673	0.50262	0.849392	0.610175
0.0812235	0.0373257	0.0120263	-0.0385892	0.00516873	-0.00868761	0.00175628	0.000120114	-0.00297331	0.000521233		0	0.000456211	0.982982	0.999794	0.615497	0.774251	0.722067	0.495844	0.858126	0.61001
0.060383	0.036545	0.00857498	-0.0168232	0.0113098	-0.00868761	0.0049739	0.0041762	0.00302739	0.00373995		0	0	0.464132	0.99732	0.181774	0.722843	0.678843	0.69939	0.628582	0.228444
-0.118037	0.033577	-0.0167824	-0.0378364	0.00472206	-0.00747125	0.00175628	0.00433232	-0.00176369	0.000521233		1	0	0.93913	0.999811	0.602664	0.722843	0.654449	0.638022	0.765498	0.605715
0.0812235	0.0370153	0.0120263	-0.0344518	0.00562087	-0.00868761	-0.000349539	0.00464398	-0.00297331	0.000521233		0	0	1	1	0.504288	0.722843	0.642071	0.55398	0.747183	0.512389
0.0745353	-0.0780079	-0.0111793	0.00594037	-0.0430347	0.0126933	-0.026211	-0.0169889	-0.00299539	-0.0116678		0	0.527372	0.969033	0.257351	0.98538	0.00447028	0.378494	0	0.843022	0.960357
0.0546193	-0.0570273	0.0152155	0.0168828	0.0256038	0.0128094	0.00205501	-0.00638491	0.00819878	0.00684902		0	0.368841	0.112227	0	0.0419103	0	0.552011	0.392823	0.46802	0.0426165
0.0546193	-0.0568091	0.0152155	0.0168828	0.0219788	0.0123857	0.00205501	0.00162717	0.00831496	0.00652896		0	0.374772	0.129039	0.0269119	0.042885	0.0406795	0.563511	0.503536	0.485388	0.0436075
0.058137	0.0296424	0.0120444	0.0210401	0.00816433	-0.00845901	0.0159787	0.00323173	-0.00408851	0.00164834		0	0.0193887	0.289672	0.993634	0.356725	1	1	0.815315	0.90536	0.443013
-0.108804	-0.0759937	-0.0399881	0.00886689	-0.0385019	0.012149	-0.00218155	0.00799857	-0.00187987	-0.0473797		1	0.368841	0.982028	0.251642	0.983431	0	0.571082	0.684385	0.832476	1
-0.108804	-0.0759937	-0.0399881	0.00886689	-0.0385019	0.0120328	-0.00218155	0.00600511	-0.00176369	-0.0473797		1	0.39188	0.989188	0.247609	0.983431	0.00715243	0.576844	0.535883	0.841595	0.999009
-0.0682354	-0.159934	0.0295502	-0.052381	-0.040243	-0.0032254	-0.00733823	-0.0101548	-0.0153887	0.00148222		1	1	0.219625	0.999208	1	0.343317	0.821234	0.123195	0.970472	0.793855
-0.0789961	-0.039052	0.0428803	0.0141871	0.0232362	0.011052	-0.0302575	-0.00681355	0.00386269	0.00640792		1	0.368841	0	0.00633482	0	0	0	0.48753	0	0
-0.0852299	0.036383	0.0397091	0.0207503	0.00961729	-0.00747125	0.0159787	0.00428291	-0.0013714	0.00158433		1	0	0.296227	0.992901	0.324561	0.722843	0.965214	1	0.84475	0.421209
-0.0852299	0.0257132	0.0397091	0.0215704	0.00992956	-0.00724265	0.0159787	0.00428291	-0.0013714	0.00164834		1	0.00661496	0.299058	0.993298	0.324561	0.762181	0.99232	0.997137	0.869093	0.420218
0.0748559	-0.0608119	-0.0184882	0.0168828	0.015325	0.0128094	0.00111402	-0.00897376	-0.00308949	0.00159615		0	0.368841	0.918524	0.353375	0.67024	0	0.500529	0.359069	0.714506	0.667658
0.0748559	-0.0608119	-0.0184882	0.0168828	0.015325	0.0116596	0.00111402	-0.00897376	-0.00297331	0.00159615		0	0.374772	0.927923	0.336689	0.670565	0.0406795	0.506283	0.346473	0.723335	0.667658
0.0807626	0.0229251	-0.027673	-0.0679086	0.00525063	-0.00816372	0.00175628	-0.0102242	-0.0044808	0.000905302		0	0.0193887	0.880436	0.999638	0.780702	1	0.733243	0.312837	0.906285	0.732408
0.0546193	-0.0570273	0.0152155	0.0136569	0.0256038	0.0128094	-0.0219744	-0.00638491	0.0081767	0.00684902		0	0.368841	0.115064	0.133113	0.0282651	0	0.371841	0.461297	0.317803	0.0287413
0.0581984	0.0368024	0.00857498	-0.00946715	0.00823069	-0.00868761	0.00963432	0.0041762	-0.0026126	0.00373995		0	0	0.424178	0.996154	0.241066	0.722843	0.839075	0.736046	0.739377	0.302279
0.0581984	0.0389325	0.00857498	0.00373871	0.00863201	-0.00868761	0.00963432	0.0041762	-0.0026126	0.00373995		0	0.000456211	0.435187	0.996111	0.241391	0.774251	0.851944	0.771996	0.75328	0.302279
-0.110436	-0.0479478	-0.047297	0.0133576	0.0146069	0.012149	-0.0229154	0.00362596	0.00548254	0.00127609		1	0.368841	0.857339	0.334518	0.655621	0	0.382642	0.569266	0.558024	0.666336
-0.118037	0.033577	-0.0564818	-0.062918	0.00472206	-0.00747125	0.00194868	0.00433232	-0.00176369	0.000521233		1	0	0.88839	0.999646	0.769331	0.722843	0.785843	0.602527	0.882566	0.738355
-0.117369	0.0193945	-0.0564818	-0.0671558	0.00375258	-0.00724265	-0.000580961	0.00421535	-0.00211049	0.000267926		1	0.00661496	0.891729	0.999538	0.769331	0.762181	0.7968	0.552072	0.89372	0.737694
-0.0867476	0.0357738	0.0397091	0.0189433	0.0134764	-0.00747125	0.00681327	0.00428291	0.0059815	0.00373995		1	0	0.363455	0.99588	0.216374	0.722843	0.652511	0.828222	0.571281	0.280476
0.076302	-0.0606205	-0.0184882	0.0168828	0.0161372	0.0128094	0.00111402	-0.00897376	0.00783806	0.00159615		0	0.368841	0.837667	0.409006	0.506173	0	0.440324	0.434026	0.578417	0.507598
0.0812235	0.0373257	0.0120263	-0.0385892	0.00516873	-0.00868761	0.00175628	0.000120114	-0.00297331	0.000521233		0	0	0.97377	0.999899	0.615335	0.722843	0.714673	0.50262	0.810683	0.610175
0.0812235	0.0373257	0.0120263	-0.0385892	0.00516873	-0.00868761	0.00175628	0.000120114	-0.00297331	0.000521233		0	0.000456211	0.982982	0.999794	0.615497	0.774251	0.722067	0.495844	0.819155	0.61001
[truncated: 802 more rows]
