# Supplementary material
Source: Research Square preprint supplement (doi:10.21203/rs.3.rs-9367379/v1)
Supplement: Supplementary file 9 [file fa5f63c32254e694e345363b.xlsx]

## Sheet: TPD_dis_DEPs
Supp.Data6.Tab1 The DEPs detected by different method from the TPD_dis data. "1" means labeled as DEP by the corresponding method, "0" means non-DEP.								Supp.Data6.Tab2 The DEPs detected by the Top3 methods from the TPD_dis data. "1" means labeled as DEP by the corresponding method, "0" means non-DEP.
protein	dlfq	top3	maxlfq	top1	MCP			protein	dlfq	maxlfq	MCP
sp|O00339|MATN2_HUMAN	1	0	1	0	0			sp|O00339|MATN2_HUMAN	1	1	0
sp|O14498|ISLR_HUMAN	1	0	0	0	1			sp|O14498|ISLR_HUMAN	1	0	1
sp|O75882|ATRN_HUMAN	1	0	0	0	0			sp|O75882|ATRN_HUMAN	1	0	0
sp|O76074|PDE5A_HUMAN	1	1	1	0	1			sp|O76074|PDE5A_HUMAN	1	1	1
sp|O94875|SRBS2_HUMAN	1	0	1	0	0			sp|O94875|SRBS2_HUMAN	1	1	0
sp|O95171|SCEL_HUMAN	1	1	0	0	1			sp|O95171|SCEL_HUMAN	1	0	1
sp|O95436|NPT2B_HUMAN	1	0	1	0	1			sp|O95436|NPT2B_HUMAN	1	1	1
sp|P00325|ADH1B_HUMAN	1	0	0	0	1			sp|P00325|ADH1B_HUMAN	1	0	1
sp|P00915|CAH1_HUMAN	1	0	0	0	1			sp|P00915|CAH1_HUMAN	1	0	1
sp|P01266|THYG_HUMAN	1	1	1	1	1			sp|P01266|THYG_HUMAN	1	1	1
sp|P02042|HBD_HUMAN	1	0	0	0	1			sp|P02042|HBD_HUMAN	1	0	1
sp|P02462|CO4A1_HUMAN	1	0	0	0	0			sp|P02462|CO4A1_HUMAN	1	0	0
sp|P02511|CRYAB_HUMAN	1	0	0	0	0			sp|P02511|CRYAB_HUMAN	1	0	0
sp|P02549|SPTA1_HUMAN	1	0	0	0	1			sp|P02549|SPTA1_HUMAN	1	0	1
sp|P02656|APOC3_HUMAN	1	0	0	0	0			sp|P02656|APOC3_HUMAN	1	0	0
sp|P02679|FIBG_HUMAN	1	0	0	0	0			sp|P02679|FIBG_HUMAN	1	0	0
sp|P02730|B3AT_HUMAN	1	0	0	0	1			sp|P02730|B3AT_HUMAN	1	0	1
sp|P02743|SAMP_HUMAN	1	0	0	0	0			sp|P02743|SAMP_HUMAN	1	0	0
sp|P02751|FINC_HUMAN	1	1	1	1	1			sp|P02751|FINC_HUMAN	1	1	1
sp|P02760|AMBP_HUMAN	1	0	0	0	0			sp|P02760|AMBP_HUMAN	1	0	0
sp|P04083|ANXA1_HUMAN	1	1	1	1	0			sp|P04083|ANXA1_HUMAN	1	1	0
sp|P05546|HEP2_HUMAN	1	0	0	0	0			sp|P05546|HEP2_HUMAN	1	0	0
sp|P07202|PERT_HUMAN	1	1	1	1	1			sp|P07202|PERT_HUMAN	1	1	1
sp|P08294|SODE_HUMAN	1	1	1	1	1			sp|P08294|SODE_HUMAN	1	1	1
sp|P08572|CO4A2_HUMAN	1	0	0	0	0			sp|P08572|CO4A2_HUMAN	1	0	0
sp|P08727|K1C19_HUMAN	1	1	1	1	0			sp|P08727|K1C19_HUMAN	1	1	0
sp|P09668|CATH_HUMAN	1	1	1	1	0			sp|P09668|CATH_HUMAN	1	1	0
sp|P09758|TACD2_HUMAN	1	1	1	1	1			sp|P09758|TACD2_HUMAN	1	1	1
sp|P11277|SPTB1_HUMAN	1	0	0	0	1			sp|P11277|SPTB1_HUMAN	1	0	1
sp|P12277|KCRB_HUMAN	1	0	0	0	0			sp|P12277|KCRB_HUMAN	1	0	0
sp|P15090|FABP4_HUMAN	1	1	1	0	1			sp|P15090|FABP4_HUMAN	1	1	1
sp|P16157|ANK1_HUMAN	1	0	0	0	1			sp|P16157|ANK1_HUMAN	1	0	1
sp|P17931|LEG3_HUMAN	1	1	1	1	0			sp|P17931|LEG3_HUMAN	1	1	0
sp|P21266|GSTM3_HUMAN	1	0	0	0	0			sp|P21266|GSTM3_HUMAN	1	0	0
sp|P22352|GPX3_HUMAN	1	0	0	0	1			sp|P22352|GPX3_HUMAN	1	0	1
sp|P22748|CAH4_HUMAN	1	0	0	0	1			sp|P22748|CAH4_HUMAN	1	0	1
sp|P23219|PGH1_HUMAN	1	0	0	0	0			sp|P23219|PGH1_HUMAN	1	0	0
sp|P24821|TENA_HUMAN	1	1	1	0	0			sp|P24821|TENA_HUMAN	1	1	0
sp|P27487|DPP4_HUMAN	1	1	1	1	1			sp|P27487|DPP4_HUMAN	1	1	1
sp|P29762|RABP1_HUMAN	1	1	1	1	1			sp|P29762|RABP1_HUMAN	1	1	1
sp|P33908|MA1A1_HUMAN	1	0	0	0	0			sp|P33908|MA1A1_HUMAN	1	0	0
sp|P39059|COFA1_HUMAN	1	0	0	0	0			sp|P39059|COFA1_HUMAN	1	0	0
sp|P43251|BTD_HUMAN	1	0	0	0	1			sp|P43251|BTD_HUMAN	1	0	1
sp|P50479|PDLI4_HUMAN	1	1	1	1	1			sp|P50479|PDLI4_HUMAN	1	1	1
sp|P51159|RB27A_HUMAN	1	1	1	1	0			sp|P51159|RB27A_HUMAN	1	1	0
sp|P52926|HMGA2_HUMAN	1	1	1	1	1			sp|P52926|HMGA2_HUMAN	1	1	1
sp|P61916|NPC2_HUMAN	1	1	1	1	0			sp|P61916|NPC2_HUMAN	1	1	0
sp|P68871|HBB_HUMAN	1	0	0	0	1			sp|P68871|HBB_HUMAN	1	0	1
sp|P69891|HBG1_HUMAN	1	0	0	0	1			sp|P69891|HBG1_HUMAN	1	0	1
sp|P69892|HBG2_HUMAN	1	0	0	0	1			sp|P69892|HBG2_HUMAN	1	0	1
sp|P69905|HBA_HUMAN	1	0	0	0	1			sp|P69905|HBA_HUMAN	1	0	1
sp|P78562|PHEX_HUMAN	1	0	0	0	0			sp|P78562|PHEX_HUMAN	1	0	0
sp|Q03692|COAA1_HUMAN	1	1	1	1	1			sp|Q03692|COAA1_HUMAN	1	1	1
sp|Q07654|TFF3_HUMAN	1	0	1	1	1			sp|Q07654|TFF3_HUMAN	1	1	1
sp|Q12912|IRAG2_HUMAN	1	0	0	0	0			sp|Q12912|IRAG2_HUMAN	1	0	0
sp|Q13228|SBP1_HUMAN	1	0	0	0	1			sp|Q13228|SBP1_HUMAN	1	0	1
sp|Q13642|FHL1_HUMAN	1	0	0	0	0			sp|Q13642|FHL1_HUMAN	1	0	0
sp|Q14376|GALE_HUMAN	1	1	1	1	1			sp|Q14376|GALE_HUMAN	1	1	1
sp|Q14764|MVP_HUMAN	1	1	1	1	0			sp|Q14764|MVP_HUMAN	1	1	0
sp|Q15714|T22D1_HUMAN	1	1	1	1	1			sp|Q15714|T22D1_HUMAN	1	1	1
sp|Q16651|PRSS8_HUMAN	1	0	0	0	1			sp|Q16651|PRSS8_HUMAN	1	0	1
sp|Q16853|AOC3_HUMAN	1	0	0	0	1			sp|Q16853|AOC3_HUMAN	1	0	1
sp|Q53RD9|FBLN7_HUMAN	1	0	0	0	0			sp|Q53RD9|FBLN7_HUMAN	1	0	0
sp|Q5SZK8|FREM2_HUMAN	1	0	1	0	1			sp|Q5SZK8|FREM2_HUMAN	1	1	1
sp|Q5VTB9|RN220_HUMAN	1	1	1	1	1			sp|Q5VTB9|RN220_HUMAN	1	1	1
sp|Q6UX53|TMT1B_HUMAN	1	1	1	1	1			sp|Q6UX53|TMT1B_HUMAN	1	1	1
sp|Q6UX72|B3GN9_HUMAN	1	0	0	0	0			sp|Q6UX72|B3GN9_HUMAN	1	0	0
sp|Q86UN3|R4RL2_HUMAN	1	0	1	0	1			sp|Q86UN3|R4RL2_HUMAN	1	1	1
sp|Q86UX2|ITIH5_HUMAN	1	0	0	0	1			sp|Q86UX2|ITIH5_HUMAN	1	0	1
sp|Q86XX4|FRAS1_HUMAN	1	0	0	0	1			sp|Q86XX4|FRAS1_HUMAN	1	0	1
sp|Q8IZH2|XRN1_HUMAN	1	0	0	0	0			sp|Q8IZH2|XRN1_HUMAN	1	0	0
sp|Q8N6C5|IGSF1_HUMAN	1	1	1	1	1			sp|Q8N6C5|IGSF1_HUMAN	1	1	1
sp|Q8NFH4|NUP37_HUMAN	1	0	0	0	0			sp|Q8NFH4|NUP37_HUMAN	1	0	0
sp|Q8WVN8|UB2Q2_HUMAN	1	0	0	0	0			sp|Q8WVN8|UB2Q2_HUMAN	1	0	0
sp|Q92817|EVPL_HUMAN	1	0	1	0	1			sp|Q92817|EVPL_HUMAN	1	1	1
sp|Q9BW04|SARG_HUMAN	1	1	1	1	1			sp|Q9BW04|SARG_HUMAN	1	1	1
sp|Q9H3U7|SMOC2_HUMAN	1	0	0	0	1			sp|Q9H3U7|SMOC2_HUMAN	1	0	1
sp|Q9NZC9|SMAL1_HUMAN	1	0	0	0	1			sp|Q9NZC9|SMAL1_HUMAN	1	0	1
sp|Q9UBG0|MRC2_HUMAN	1	0	1	0	0			sp|Q9UBG0|MRC2_HUMAN	1	1	0
sp|Q9UH62|ARMX3_HUMAN	1	1	1	0	0			sp|Q9UH62|ARMX3_HUMAN	1	1	0
sp|Q9Y2P4|S27A6_HUMAN	1	0	0	0	0			sp|Q9Y2P4|S27A6_HUMAN	1	0	0
sp|Q9Y646|CBPQ_HUMAN	1	0	0	0	0			sp|Q9Y646|CBPQ_HUMAN	1	0	0
sp|Q9Y6M1|IF2B2_HUMAN	1	0	1	0	1			sp|Q9Y6M1|IF2B2_HUMAN	1	1	1
sp|O00231|PSD11_HUMAN	0	1	0	1	0			sp|O00154|BACH_HUMAN	0	1	0
sp|O00299|CLIC1_HUMAN	0	1	0	1	0			sp|O00469|PLOD2_HUMAN	0	1	0
sp|O00469|PLOD2_HUMAN	0	1	1	1	0			sp|O14907|TX1B3_HUMAN	0	1	0
sp|O14737|PDCD5_HUMAN	0	1	0	0	0			sp|O15143|ARC1B_HUMAN	0	1	0
sp|O14907|TX1B3_HUMAN	0	1	1	1	0			sp|O15460|P4HA2_HUMAN	0	1	0
sp|O14979|HNRDL_HUMAN	0	1	0	0	0			sp|O43516|WIPF1_HUMAN	0	1	0
sp|O15143|ARC1B_HUMAN	0	1	1	1	0			sp|O60282|KIF5C_HUMAN	0	1	0
sp|O15144|ARPC2_HUMAN	0	1	0	0	0			sp|O60437|PEPL_HUMAN	0	1	0
sp|O15264|MK13_HUMAN	0	1	0	0	0			sp|O75223|GGCT_HUMAN	0	1	0
sp|O15371|EIF3D_HUMAN	0	1	0	0	0			sp|O75348|VATG1_HUMAN	0	1	0
sp|O15400|STX7_HUMAN	0	1	0	0	0			sp|O75390|CISY_HUMAN	0	1	0
sp|O15460|P4HA2_HUMAN	0	1	1	0	0			sp|O95571|ETHE1_HUMAN	0	1	0
sp|O15511|ARPC5_HUMAN	0	1	0	1	0			sp|O95715|CXL14_HUMAN	0	1	0
sp|O43169|CYB5B_HUMAN	0	1	0	0	0			sp|P01033|TIMP1_HUMAN	0	1	0
sp|O43324|MCA3_HUMAN	0	1	0	0	0			sp|P02794|FRIH_HUMAN	0	1	0
sp|O43516|WIPF1_HUMAN	0	1	1	0	0			sp|P04179|SODM_HUMAN	0	1	0
sp|O43583|DENR_HUMAN	0	1	0	1	0			sp|P05362|ICAM1_HUMAN	0	1	0
sp|O43852|CALU_HUMAN	0	1	0	1	0			sp|P06703|S10A6_HUMAN	0	1	0
sp|O60282|KIF5C_HUMAN	0	1	1	0	0			sp|P07203|GPX1_HUMAN	0	1	0
sp|O60437|PEPL_HUMAN	0	1	1	0	0			sp|P07225|PROS_HUMAN	0	1	0
sp|O60493|SNX3_HUMAN	0	1	0	1	0			sp|P07737|PROF1_HUMAN	0	1	0
sp|O60502|OGA_HUMAN	0	1	0	0	0			sp|P07858|CATB_HUMAN	0	1	0
sp|O60739|EIF1B_HUMAN	0	1	0	0	0			sp|P10809|CH60_HUMAN	0	1	0
sp|O60749|SNX2_HUMAN	0	1	0	0	0			sp|P11177|ODPB_HUMAN	0	1	0
sp|O60763|USO1_HUMAN	0	1	0	1	0			sp|P11498|PYC_HUMAN	0	1	0
sp|O60812|HNRC1_HUMAN	0	1	0	1	0			sp|P11717|MPRI_HUMAN	0	1	0
sp|O75083|WDR1_HUMAN	0	1	0	1	0			sp|P12235|ADT1_HUMAN	0	1	0
sp|O75223|GGCT_HUMAN	0	1	1	1	0			sp|P13796|PLSL_HUMAN	0	1	0
sp|O75347|TBCA_HUMAN	0	1	0	0	0			sp|P13804|ETFA_HUMAN	0	1	0
sp|O75348|VATG1_HUMAN	0	1	1	1	0			sp|P16401|H15_HUMAN	0	1	0
sp|O75367|H2AY_HUMAN	0	1	0	1	0			sp|P16949|STMN1_HUMAN	0	1	0
sp|O75390|CISY_HUMAN	0	1	1	0	0			sp|P16989|YBOX3_HUMAN	0	1	0
sp|O75396|SC22B_HUMAN	0	1	0	1	0			sp|P20700|LMNB1_HUMAN	0	1	0
sp|O75400|PR40A_HUMAN	0	1	0	0	0			sp|P21796|VDAC1_HUMAN	0	1	0
sp|O75531|BAF_HUMAN	0	1	0	1	0			sp|P23297|S10A1_HUMAN	0	1	0
sp|O75947|ATP5H_HUMAN	0	1	0	1	0			sp|P23381|SYWC_HUMAN	0	1	0
sp|O76027|ANXA9_HUMAN	0	1	0	1	0			sp|P26038|MOES_HUMAN	0	1	0
sp|O95372|LYPA2_HUMAN	0	1	0	1	0			sp|P26447|S10A4_HUMAN	0	1	0
sp|O95571|ETHE1_HUMAN	0	1	1	1	0			sp|P27816|MAP4_HUMAN	0	1	0
sp|O95715|CXL14_HUMAN	0	1	1	1	0			sp|P31947|1433S_HUMAN	0	1	0
sp|O95757|HS74L_HUMAN	0	1	0	0	0			sp|P31949|S10AB_HUMAN	0	1	0
sp|O95831|AIFM1_HUMAN	0	1	0	0	0			sp|P34897|GLYM_HUMAN	0	1	0
sp|O95848|NUD14_HUMAN	0	1	0	1	0			sp|P36776|LONM_HUMAN	0	1	0
sp|P00338|LDHA_HUMAN	0	1	0	0	0			sp|P36957|ODO2_HUMAN	0	1	0
sp|P00367|DHE3_HUMAN	0	1	0	1	0			sp|P38117|ETFB_HUMAN	0	1	0
sp|P00491|PNPH_HUMAN	0	1	0	1	0			sp|P40926|MDHM_HUMAN	0	1	0
sp|P00505|AATM_HUMAN	0	1	0	0	0			sp|P41250|GARS_HUMAN	0	1	0
sp|P00568|KAD1_HUMAN	0	1	0	1	0			sp|P42224|STAT1_HUMAN	0	1	0
sp|P01033|TIMP1_HUMAN	0	1	1	1	0			sp|P42765|THIM_HUMAN	0	1	0
sp|P01903|DRA_HUMAN	0	1	0	0	0			sp|P43304|GPDM_HUMAN	0	1	0
sp|P02545|LMNA_HUMAN	0	1	0	1	0			sp|P43490|NAMPT_HUMAN	0	1	0
sp|P02792|FRIL_HUMAN	0	1	0	1	0			sp|P45880|VDAC2_HUMAN	0	1	0
sp|P02794|FRIH_HUMAN	0	1	1	1	0			sp|P46940|IQGA1_HUMAN	0	1	0
sp|P04075|ALDOA_HUMAN	0	1	0	1	0			sp|P48735|IDHP_HUMAN	0	1	0
sp|P04080|CYTB_HUMAN	0	1	0	1	0			sp|P49748|ACADV_HUMAN	0	1	0
sp|P04179|SODM_HUMAN	0	1	1	1	0			sp|P50213|IDH3A_HUMAN	0	1	0
sp|P04406|G3P_HUMAN	0	1	0	1	0			sp|P50454|SERPH_HUMAN	0	1	0
sp|P05141|ADT2_HUMAN	0	1	0	1	0			sp|P53634|CATC_HUMAN	0	1	0
sp|P05198|IF2A_HUMAN	0	1	0	1	0			sp|P54819|KAD2_HUMAN	0	1	0
sp|P05362|ICAM1_HUMAN	0	1	1	0	0			sp|P55263|ADK_HUMAN	0	1	0
sp|P05387|RLA2_HUMAN	0	1	0	1	0			sp|P61604|CH10_HUMAN	0	1	0
sp|P05783|K1C18_HUMAN	0	1	0	0	0			sp|P62328|TYB4_HUMAN	0	1	0
sp|P06396|GELS_HUMAN	0	1	0	1	0			sp|P62861|RS30_HUMAN	0	1	0
sp|P06576|ATPB_HUMAN	0	1	0	1	0			sp|P62877|RBX1_HUMAN	0	1	0
sp|P06703|S10A6_HUMAN	0	1	1	1	0			sp|P63313|TYB10_HUMAN	0	1	0
sp|P06733|ENOA_HUMAN	0	1	0	1	0			sp|Q00059|TFAM_HUMAN	0	1	0
sp|P06737|PYGL_HUMAN	0	1	0	1	0			sp|Q02978|M2OM_HUMAN	0	1	0
sp|P06748|NPM_HUMAN	0	1	0	1	0			sp|Q04837|SSBP_HUMAN	0	1	0
sp|P07108|ACBP_HUMAN	0	1	0	1	0			sp|Q04941|PLP2_HUMAN	0	1	0
sp|P07203|GPX1_HUMAN	0	1	1	0	0			sp|Q06210|GFPT1_HUMAN	0	1	0
sp|P07225|PROS_HUMAN	0	1	1	1	0			sp|Q07812|BAX_HUMAN	0	1	0
sp|P07355|ANXA2_HUMAN	0	1	0	1	0			sp|Q13596|SNX1_HUMAN	0	1	0
sp|P07437|TBB5_HUMAN	0	1	0	1	0			sp|Q14195|DPYL3_HUMAN	0	1	0
sp|P07737|PROF1_HUMAN	0	1	1	1	0			sp|Q16698|DECR_HUMAN	0	1	0
sp|P07858|CATB_HUMAN	0	1	1	1	0			sp|Q16890|TPD53_HUMAN	0	1	0
sp|P07900|HS90A_HUMAN	0	1	0	1	0			sp|Q5RI15|COX20_HUMAN	0	1	0
sp|P07910|HNRPC_HUMAN	0	1	0	1	0			sp|Q6NVY1|HIBCH_HUMAN	0	1	0
sp|P08174|DAF_HUMAN	0	1	0	1	0			sp|Q8IVF2|AHNK2_HUMAN	0	1	0
sp|P08670|VIME_HUMAN	0	1	0	1	0			sp|Q8TD06|AGR3_HUMAN	0	1	0
sp|P08708|RS17_HUMAN	0	1	0	0	0			sp|Q8TEA8|DTD1_HUMAN	0	1	0
sp|P08865|RSSA_HUMAN	0	1	0	1	0			sp|Q96C19|EFHD2_HUMAN	0	1	0
sp|P09234|RU1C_HUMAN	0	1	0	1	0			sp|Q99584|S10AD_HUMAN	0	1	0
sp|P09382|LEG1_HUMAN	0	1	0	1	0			sp|Q99715|COCA1_HUMAN	0	1	0
sp|P09429|HMGB1_HUMAN	0	1	0	1	0			sp|Q9BPX5|ARP5L_HUMAN	0	1	0
sp|P09651|ROA1_HUMAN	0	1	0	1	0			sp|Q9BTT0|AN32E_HUMAN	0	1	0
sp|P09874|PARP1_HUMAN	0	1	0	1	0			sp|Q9BUF5|TBB6_HUMAN	0	1	0
sp|P10515|ODP2_HUMAN	0	1	0	1	0			sp|Q9BV40|VAMP8_HUMAN	0	1	0
sp|P10620|MGST1_HUMAN	0	1	0	1	0			sp|Q9BZG1|RAB34_HUMAN	0	1	0
sp|P10809|CH60_HUMAN	0	1	1	1	0			sp|Q9HBL7|PLRKT_HUMAN	0	1	0
sp|P11142|HSP7C_HUMAN	0	1	0	1	0			sp|Q9P2K5|MYEF2_HUMAN	0	1	0
sp|P11177|ODPB_HUMAN	0	1	1	0	0			sp|Q9UHD8|SEPT9_HUMAN	0	1	0
sp|P11217|PYGM_HUMAN	0	1	0	1	0			sp|Q9UKK3|PARP4_HUMAN	0	1	0
sp|P11310|ACADM_HUMAN	0	1	0	0	0			sp|Q9Y3Z3|SAMH1_HUMAN	0	1	0
sp|P11498|PYC_HUMAN	0	1	1	0	0			sp|Q9Y5L4|TIM13_HUMAN	0	1	0
sp|P11717|MPRI_HUMAN	0	1	1	1	0			sp|Q9Y6N5|SQOR_HUMAN	0	1	0
sp|P12235|ADT1_HUMAN	0	1	1	0	0			sp|P06732|KCRM_HUMAN	0	0	1
sp|P12236|ADT3_HUMAN	0	1	0	1	0			sp|P06753|TPM3_HUMAN	0	0	1
sp|P13073|COX41_HUMAN	0	1	0	1	0			sp|P36222|CH3L1_HUMAN	0	0	1
sp|P13489|RINI_HUMAN	0	1	0	0	0			sp|Q13231|CHIT1_HUMAN	0	0	1
sp|P13611|CSPG2_HUMAN	0	1	0	0	0			sp|Q8NDA2|HMCN2_HUMAN	0	0	1
sp|P13639|EF2_HUMAN	0	1	0	1	0			sp|Q96Q05|TPPC9_HUMAN	0	0	1
sp|P13796|PLSL_HUMAN	0	1	1	0	0			sp|Q9UKX2|MYH2_HUMAN	0	0	1
sp|P13797|PLST_HUMAN	0	1	0	1	0
sp|P14649|MYL6B_HUMAN	0	1	0	1	0
sp|P14866|HNRPL_HUMAN	0	1	0	1	0
sp|P15311|EZRI_HUMAN	0	1	0	1	0
sp|P15531|NDKA_HUMAN	0	1	0	1	0
sp|P15880|RS2_HUMAN	0	1	0	1	0
sp|P16401|H15_HUMAN	0	1	1	1	0
sp|P16949|STMN1_HUMAN	0	1	1	1	0
sp|P16989|YBOX3_HUMAN	0	1	1	0	0
sp|P17096|HMGA1_HUMAN	0	1	0	0	0
sp|P17661|DESM_HUMAN	0	1	0	1	0
sp|P17844|DDX5_HUMAN	0	1	0	1	0
sp|P17980|PRS6A_HUMAN	0	1	0	1	0
sp|P18077|RL35A_HUMAN	0	1	0	1	0
sp|P18124|RL7_HUMAN	0	1	0	1	0
sp|P18754|RCC1_HUMAN	0	1	0	0	0
sp|P19105|ML12A_HUMAN	0	1	0	1	0
sp|P19338|NUCL_HUMAN	0	1	0	1	0
sp|P19971|TYPH_HUMAN	0	1	0	1	0
sp|P20618|PSB1_HUMAN	0	1	0	0	0
sp|P20674|COX5A_HUMAN	0	1	0	1	0
sp|P20700|LMNB1_HUMAN	0	1	1	1	0
sp|P21333|FLNA_HUMAN	0	1	0	0	0
sp|P21397|AOFA_HUMAN	0	1	0	1	0
sp|P21980|TGM2_HUMAN	0	1	0	1	0
sp|P22392|NDKB_HUMAN	0	1	0	0	0
sp|P22570|ADRO_HUMAN	0	1	0	1	0
sp|P23246|SFPQ_HUMAN	0	1	0	1	0
sp|P23297|S10A1_HUMAN	0	1	1	1	0
sp|P23368|MAOM_HUMAN	0	1	0	0	0
sp|P23381|SYWC_HUMAN	0	1	1	0	0
sp|P23528|COF1_HUMAN	0	1	0	1	0
sp|P23919|KTHY_HUMAN	0	1	0	0	0
sp|P24534|EF1B_HUMAN	0	1	0	1	0
sp|P24752|THIL_HUMAN	0	1	0	1	0
sp|P25398|RS12_HUMAN	0	1	0	1	0
sp|P25705|ATPA_HUMAN	0	1	0	1	0
sp|P25774|CATS_HUMAN	0	1	0	0	0
sp|P25789|PSA4_HUMAN	0	1	0	1	0
sp|P26038|MOES_HUMAN	0	1	1	1	0
sp|P26368|U2AF2_HUMAN	0	1	0	1	0
sp|P26373|RL13_HUMAN	0	1	0	1	0
sp|P26447|S10A4_HUMAN	0	1	1	1	0
sp|P26640|SYVC_HUMAN	0	1	0	0	0
sp|P26641|EF1G_HUMAN	0	1	0	0	0
sp|P27338|AOFB_HUMAN	0	1	0	0	0
sp|P27635|RL10_HUMAN	0	1	0	1	0
sp|P27658|CO8A1_HUMAN	0	1	0	1	0
sp|P27816|MAP4_HUMAN	0	1	1	0	0
sp|P28065|PSB9_HUMAN	0	1	0	1	0
sp|P28066|PSA5_HUMAN	0	1	0	1	0
sp|P28482|MK01_HUMAN	0	1	0	1	0
sp|P29373|RABP2_HUMAN	0	1	0	1	0
sp|P29590|PML_HUMAN	0	1	0	1	0
sp|P29692|EF1D_HUMAN	0	1	0	1	0
sp|P29966|MARCS_HUMAN	0	1	0	1	0
sp|P30048|PRDX3_HUMAN	0	1	0	1	0
sp|P30049|ATPD_HUMAN	0	1	0	1	0
sp|P30050|RL12_HUMAN	0	1	0	1	0
sp|P30084|ECHM_HUMAN	0	1	0	1	0
sp|P30613|KPYR_HUMAN	0	1	0	1	0
sp|P30740|ILEU_HUMAN	0	1	0	1	0
sp|P31483|TIA1_HUMAN	0	1	0	1	0
sp|P31937|3HIDH_HUMAN	0	1	0	1	0
sp|P31939|PUR9_HUMAN	0	1	0	1	0
sp|P31943|HNRH1_HUMAN	0	1	0	1	0
sp|P31947|1433S_HUMAN	0	1	1	1	0
sp|P31949|S10AB_HUMAN	0	1	1	1	0
sp|P32969|RL9_HUMAN	0	1	0	1	0
sp|P34897|GLYM_HUMAN	0	1	1	1	0
sp|P34932|HSP74_HUMAN	0	1	0	0	0
sp|P35232|PHB1_HUMAN	0	1	0	1	0
sp|P35268|RL22_HUMAN	0	1	0	1	0
sp|P35443|TSP4_HUMAN	0	1	0	1	0
sp|P35914|HMGCL_HUMAN	0	1	0	1	0
sp|P36222|CH3L1_HUMAN	0	1	0	1	1
sp|P36542|ATPG_HUMAN	0	1	0	1	0
sp|P36543|VATE1_HUMAN	0	1	0	0	0
sp|P36776|LONM_HUMAN	0	1	1	0	0
sp|P36957|ODO2_HUMAN	0	1	1	1	0
sp|P36969|GPX4_HUMAN	0	1	0	1	0
sp|P37108|SRP14_HUMAN	0	1	0	1	0
sp|P37802|TAGL2_HUMAN	0	1	0	1	0
sp|P38117|ETFB_HUMAN	0	1	1	1	0
sp|P38159|RBMX_HUMAN	0	1	0	1	0
sp|P38606|VATA_HUMAN	0	1	0	1	0
sp|P38646|GRP75_HUMAN	0	1	0	1	0
sp|P38919|IF4A3_HUMAN	0	1	0	1	0
sp|P39019|RS19_HUMAN	0	1	0	1	0
sp|P39023|RL3_HUMAN	0	1	0	1	0
sp|P39656|OST48_HUMAN	0	1	0	1	0
sp|P39687|AN32A_HUMAN	0	1	0	1	0
sp|P40227|TCPZ_HUMAN	0	1	0	1	0
sp|P40429|RL13A_HUMAN	0	1	0	1	0
sp|P40926|MDHM_HUMAN	0	1	1	1	0
sp|P40939|ECHA_HUMAN	0	1	0	1	0
sp|P41250|GARS_HUMAN	0	1	1	1	0
sp|P42126|ECI1_HUMAN	0	1	0	1	0
sp|P42166|LAP2A_HUMAN	0	1	0	1	0
sp|P42167|LAP2B_HUMAN	0	1	0	1	0
sp|P42224|STAT1_HUMAN	0	1	1	1	0
sp|P42677|RS27_HUMAN	0	1	0	1	0
sp|P42765|THIM_HUMAN	0	1	1	1	0
sp|P42766|RL35_HUMAN	0	1	0	0	0
sp|P43034|LIS1_HUMAN	0	1	0	0	0
sp|P43304|GPDM_HUMAN	0	1	1	0	0
sp|P43307|SSRA_HUMAN	0	1	0	0	0
sp|P43353|AL3B1_HUMAN	0	1	0	1	0
sp|P43490|NAMPT_HUMAN	0	1	1	1	0
sp|P43686|PRS6B_HUMAN	0	1	0	0	0
sp|P45880|VDAC2_HUMAN	0	1	1	1	0
sp|P46776|RL27A_HUMAN	0	1	0	1	0
sp|P46777|RL5_HUMAN	0	1	0	1	0
sp|P46778|RL21_HUMAN	0	1	0	1	0
sp|P46779|RL28_HUMAN	0	1	0	1	0
sp|P46783|RS10_HUMAN	0	1	0	1	0
sp|P46940|IQGA1_HUMAN	0	1	1	1	0
sp|P48047|ATPO_HUMAN	0	1	0	1	0
sp|P49006|MRP_HUMAN	0	1	0	0	0
sp|P49207|RL34_HUMAN	0	1	0	1	0
sp|P49368|TCPG_HUMAN	0	1	0	1	0
sp|P49441|INPP_HUMAN	0	1	0	1	0
sp|P49748|ACADV_HUMAN	0	1	1	1	0
sp|P50454|SERPH_HUMAN	0	1	1	1	0
sp|P50990|TCPQ_HUMAN	0	1	0	1	0
sp|P50995|ANX11_HUMAN	0	1	0	1	0
sp|P51149|RAB7A_HUMAN	0	1	0	1	0
sp|P51157|RAB28_HUMAN	0	1	0	1	0
sp|P51553|IDH3G_HUMAN	0	1	0	0	0
sp|P51608|MECP2_HUMAN	0	1	0	0	0
sp|P51991|ROA3_HUMAN	0	1	0	1	0
sp|P52272|HNRPM_HUMAN	0	1	0	1	0
sp|P52434|RPAB3_HUMAN	0	1	0	0	0
sp|P52597|HNRPF_HUMAN	0	1	0	0	0
sp|P52907|CAZA1_HUMAN	0	1	0	0	0
sp|P53004|BIEA_HUMAN	0	1	0	1	0
sp|P54577|SYYC_HUMAN	0	1	0	1	0
sp|P54727|RD23B_HUMAN	0	1	0	1	0
sp|P54819|KAD2_HUMAN	0	1	1	1	0
sp|P55084|ECHB_HUMAN	0	1	0	1	0
sp|P55209|NP1L1_HUMAN	0	1	0	1	0
sp|P55265|DSRAD_HUMAN	0	1	0	0	0
sp|P55786|PSA_HUMAN	0	1	0	1	0
sp|P56381|ATP5E_HUMAN	0	1	0	1	0
sp|P56385|ATP5I_HUMAN	0	1	0	1	0
sp|P57735|RAB25_HUMAN	0	1	0	0	0
sp|P59998|ARPC4_HUMAN	0	1	0	1	0
sp|P60174|TPIS_HUMAN	0	1	0	1	0
sp|P60842|IF4A1_HUMAN	0	1	0	1	0
sp|P60866|RS20_HUMAN	0	1	0	0	0
sp|P60900|PSA6_HUMAN	0	1	0	0	0
sp|P61019|RAB2A_HUMAN	0	1	0	1	0
sp|P61158|ARP3_HUMAN	0	1	0	1	0
sp|P61160|ARP2_HUMAN	0	1	0	1	0
sp|P61247|RS3A_HUMAN	0	1	0	1	0
sp|P61313|RL15_HUMAN	0	1	0	1	0
sp|P61353|RL27_HUMAN	0	1	0	1	0
sp|P61604|CH10_HUMAN	0	1	1	1	0
sp|P61978|HNRPK_HUMAN	0	1	0	1	0
sp|P61981|1433G_HUMAN	0	1	0	1	0
sp|P62081|RS7_HUMAN	0	1	0	0	0
sp|P62140|PP1B_HUMAN	0	1	0	1	0
sp|P62241|RS8_HUMAN	0	1	0	1	0
sp|P62249|RS16_HUMAN	0	1	0	1	0
sp|P62263|RS14_HUMAN	0	1	0	1	0
sp|P62266|RS23_HUMAN	0	1	0	0	0
sp|P62269|RS18_HUMAN	0	1	0	0	0
sp|P62273|RS29_HUMAN	0	1	0	1	0
sp|P62277|RS13_HUMAN	0	1	0	0	0
sp|P62280|RS11_HUMAN	0	1	0	1	0
sp|P62314|SMD1_HUMAN	0	1	0	1	0
sp|P62318|SMD3_HUMAN	0	1	0	1	0
sp|P62328|TYB4_HUMAN	0	1	1	1	0
sp|P62424|RL7A_HUMAN	0	1	0	1	0
sp|P62750|RL23A_HUMAN	0	1	0	1	0
sp|P62753|RS6_HUMAN	0	1	0	1	0
sp|P62829|RL23_HUMAN	0	1	0	1	0
sp|P62841|RS15_HUMAN	0	1	0	1	0
sp|P62851|RS25_HUMAN	0	1	0	1	0
sp|P62854|RS26_HUMAN	0	1	0	1	0
sp|P62857|RS28_HUMAN	0	1	0	1	0
sp|P62861|RS30_HUMAN	0	1	1	1	0
sp|P62877|RBX1_HUMAN	0	1	1	1	0
sp|P62888|RL30_HUMAN	0	1	0	0	0
sp|P62899|RL31_HUMAN	0	1	0	0	0
sp|P62906|RL10A_HUMAN	0	1	0	1	0
sp|P62910|RL32_HUMAN	0	1	0	1	0
sp|P62913|RL11_HUMAN	0	1	0	1	0
sp|P62917|RL8_HUMAN	0	1	0	1	0
sp|P63104|1433Z_HUMAN	0	1	0	0	0
sp|P63173|RL38_HUMAN	0	1	0	1	0
sp|P63220|RS21_HUMAN	0	1	0	0	0
sp|P63241|IF5A1_HUMAN	0	1	0	1	0
sp|P63244|RACK1_HUMAN	0	1	0	1	0
sp|P63261|ACTG_HUMAN	0	1	0	1	0
sp|P63279|UBC9_HUMAN	0	1	0	1	0
sp|P63313|TYB10_HUMAN	0	1	1	1	0
sp|P67809|YBOX1_HUMAN	0	1	0	1	0
sp|P67936|TPM4_HUMAN	0	1	0	0	0
sp|P68032|ACTC_HUMAN	0	1	0	1	0
sp|P68104|EF1A1_HUMAN	0	1	0	1	0
sp|P68366|TBA4A_HUMAN	0	1	0	1	0
sp|P68371|TBB4B_HUMAN	0	1	0	1	0
sp|P78344|IF4G2_HUMAN	0	1	0	0	0
sp|P78371|TCPB_HUMAN	0	1	0	0	0
sp|P82979|SARNP_HUMAN	0	1	0	0	0
sp|P83731|RL24_HUMAN	0	1	0	1	0
sp|P84090|ERH_HUMAN	0	1	0	1	0
sp|P84098|RL19_HUMAN	0	1	0	0	0
sp|P99999|CYC_HUMAN	0	1	0	1	0
sp|Q00059|TFAM_HUMAN	0	1	1	1	0
sp|Q00325|S25A3_HUMAN	0	1	0	1	0
sp|Q00610|CLH1_HUMAN	0	1	0	0	0
sp|Q00839|HNRPU_HUMAN	0	1	0	0	0
sp|Q01105|SET_HUMAN	0	1	0	1	0
sp|Q01130|SRSF2_HUMAN	0	1	0	1	0
sp|Q01658|NC2B_HUMAN	0	1	0	0	0
sp|Q01813|PFKAP_HUMAN	0	1	0	1	0
sp|Q01831|XPC_HUMAN	0	1	0	0	0
sp|Q02218|ODO1_HUMAN	0	1	0	1	0
sp|Q02878|RL6_HUMAN	0	1	0	1	0
sp|Q04206|TF65_HUMAN	0	1	0	0	0
sp|Q04837|SSBP_HUMAN	0	1	1	0	0
sp|Q04917|1433F_HUMAN	0	1	0	1	0
sp|Q04941|PLP2_HUMAN	0	1	1	1	0
sp|Q06210|GFPT1_HUMAN	0	1	1	1	0
sp|Q07020|RL18_HUMAN	0	1	0	1	0
sp|Q07021|C1QBP_HUMAN	0	1	0	0	0
sp|Q07666|KHDR1_HUMAN	0	1	0	1	0
sp|Q07812|BAX_HUMAN	0	1	1	1	0
sp|Q08211|DHX9_HUMAN	0	1	0	0	0
sp|Q09028|RBBP4_HUMAN	0	1	0	1	0
sp|Q10567|AP1B1_HUMAN	0	1	0	0	0
sp|Q12792|TWF1_HUMAN	0	1	0	1	0
sp|Q12874|SF3A3_HUMAN	0	1	0	0	0
sp|Q13011|ECH1_HUMAN	0	1	0	1	0
sp|Q13162|PRDX4_HUMAN	0	1	0	0	0
sp|Q13185|CBX3_HUMAN	0	1	0	0	0
sp|Q13247|SRSF6_HUMAN	0	1	0	1	0
sp|Q13263|TIF1B_HUMAN	0	1	0	1	0
sp|Q13310|PABP4_HUMAN	0	1	0	0	0
sp|Q13409|DC1I2_HUMAN	0	1	0	1	0
sp|Q13427|PPIG_HUMAN	0	1	0	1	0
sp|Q13442|HAP28_HUMAN	0	1	0	0	0
sp|Q13541|4EBP1_HUMAN	0	1	0	0	0
sp|Q13554|KCC2B_HUMAN	0	1	0	1	0
sp|Q13557|KCC2D_HUMAN	0	1	0	1	0
sp|Q13576|IQGA2_HUMAN	0	1	0	0	0
sp|Q13596|SNX1_HUMAN	0	1	1	1	0
sp|Q13630|FCL_HUMAN	0	1	0	0	0
sp|Q13838|DX39B_HUMAN	0	1	0	1	0
sp|Q14103|HNRPD_HUMAN	0	1	0	1	0
sp|Q14195|DPYL3_HUMAN	0	1	1	1	0
sp|Q14247|SRC8_HUMAN	0	1	0	1	0
sp|Q14444|CAPR1_HUMAN	0	1	0	0	0
sp|Q14571|ITPR2_HUMAN	0	1	0	0	0
sp|Q14847|LASP1_HUMAN	0	1	0	0	0
sp|Q14974|IMB1_HUMAN	0	1	0	0	0
sp|Q15005|SPCS2_HUMAN	0	1	0	0	0
sp|Q15008|PSMD6_HUMAN	0	1	0	0	0
sp|Q15020|SART3_HUMAN	0	1	0	0	0
sp|Q15024|EXOS7_HUMAN	0	1	0	1	0
sp|Q15027|ACAP1_HUMAN	0	1	0	1	0
sp|Q15029|U5S1_HUMAN	0	1	0	1	0
sp|Q15056|IF4H_HUMAN	0	1	0	1	0
sp|Q15149|PLEC_HUMAN	0	1	0	1	0
sp|Q15165|PON2_HUMAN	0	1	0	1	0
sp|Q15181|IPYR_HUMAN	0	1	0	0	0
sp|Q15287|RNPS1_HUMAN	0	1	0	1	0
sp|Q15370|ELOB_HUMAN	0	1	0	1	0
sp|Q15417|CNN3_HUMAN	0	1	0	1	0
sp|Q15428|SF3A2_HUMAN	0	1	0	0	0
sp|Q15435|PP1R7_HUMAN	0	1	0	1	0
sp|Q15437|SC23B_HUMAN	0	1	0	1	0
sp|Q15637|SF01_HUMAN	0	1	0	0	0
sp|Q16186|ADRM1_HUMAN	0	1	0	1	0
sp|Q16698|DECR_HUMAN	0	1	1	1	0
sp|Q16822|PCKGM_HUMAN	0	1	0	0	0
sp|Q16836|HCDH_HUMAN	0	1	0	1	0
sp|Q16864|VATF_HUMAN	0	1	0	1	0
sp|Q16890|TPD53_HUMAN	0	1	1	0	0
sp|Q16891|MIC60_HUMAN	0	1	0	1	0
sp|Q1KMD3|HNRL2_HUMAN	0	1	0	0	0
sp|Q53EL6|PDCD4_HUMAN	0	1	0	1	0
sp|Q562R1|ACTBL_HUMAN	0	1	0	1	0
sp|Q5RI15|COX20_HUMAN	0	1	1	0	0
sp|Q5T5P2|SKT_HUMAN	0	1	0	1	0
sp|Q5VWQ8|DAB2P_HUMAN	0	1	0	1	0
sp|Q5VWZ2|LYPL1_HUMAN	0	1	0	1	0
sp|Q68EM7|RHG17_HUMAN	0	1	0	0	0
sp|Q6DKJ4|NXN_HUMAN	0	1	0	0	0
sp|Q6EMK4|VASN_HUMAN	0	1	0	0	0
sp|Q6NUK1|SCMC1_HUMAN	0	1	0	0	0
sp|Q6NVY1|HIBCH_HUMAN	0	1	1	1	0
sp|Q6P179|ERAP2_HUMAN	0	1	0	0	0
sp|Q6PKG0|LARP1_HUMAN	0	1	0	1	0
sp|Q6YP21|KAT3_HUMAN	0	1	0	1	0
sp|Q71U36|TBA1A_HUMAN	0	1	0	1	0
sp|Q71UM5|RS27L_HUMAN	0	1	0	1	0
sp|Q86UE4|LYRIC_HUMAN	0	1	0	0	0
sp|Q86V81|THOC4_HUMAN	0	1	0	1	0
sp|Q86VP6|CAND1_HUMAN	0	1	0	0	0
sp|Q86Y82|STX12_HUMAN	0	1	0	1	0
sp|Q8IXI2|MIRO1_HUMAN	0	1	0	1	0
sp|Q8NBS9|TXND5_HUMAN	0	1	0	0	0
sp|Q8NC51|SERB1_HUMAN	0	1	0	0	0
sp|Q8NDC0|MISSL_HUMAN	0	1	0	0	0
sp|Q8NF91|SYNE1_HUMAN	0	1	0	1	0
sp|Q8NFU3|TSTD1_HUMAN	0	1	0	1	0
sp|Q8NFV4|ABHDB_HUMAN	0	1	0	0	0
sp|Q8TCU6|PREX1_HUMAN	0	1	0	1	0
sp|Q8TD06|AGR3_HUMAN	0	1	1	1	0
sp|Q8TEA8|DTD1_HUMAN	0	1	1	1	0
sp|Q8WVY7|UBCP1_HUMAN	0	1	0	0	0
sp|Q8WW12|PCNP_HUMAN	0	1	0	1	0
sp|Q8WWM7|ATX2L_HUMAN	0	1	0	0	0
sp|Q92506|DHB8_HUMAN	0	1	0	1	0
sp|Q92598|HS105_HUMAN	0	1	0	0	0
sp|Q92616|GCN1_HUMAN	0	1	0	0	0
sp|Q92804|RBP56_HUMAN	0	1	0	1	0
sp|Q92841|DDX17_HUMAN	0	1	0	0	0
sp|Q92882|OSTF1_HUMAN	0	1	0	1	0
sp|Q92945|FUBP2_HUMAN	0	1	0	1	0
sp|Q96A57|TM230_HUMAN	0	1	0	1	0
sp|Q96AE4|FUBP1_HUMAN	0	1	0	1	0
sp|Q96AG4|LRC59_HUMAN	0	1	0	0	0
sp|Q96C19|EFHD2_HUMAN	0	1	1	1	0
sp|Q96C90|PP14B_HUMAN	0	1	0	1	0
sp|Q96CT7|CC124_HUMAN	0	1	0	1	0
sp|Q96D15|RCN3_HUMAN	0	1	0	1	0
sp|Q96EL3|RM53_HUMAN	0	1	0	1	0
sp|Q96EP5|DAZP1_HUMAN	0	1	0	1	0
sp|Q96FF7|MISP3_HUMAN	0	1	0	1	0
sp|Q96Q05|TPPC9_HUMAN	0	1	0	1	1
sp|Q96QK1|VPS35_HUMAN	0	1	0	0	0
sp|Q99536|VAT1_HUMAN	0	1	0	1	0
sp|Q99584|S10AD_HUMAN	0	1	1	1	0
sp|Q99613|EIF3C_HUMAN	0	1	0	1	0
sp|Q99614|TTC1_HUMAN	0	1	0	0	0
sp|Q99623|PHB2_HUMAN	0	1	0	1	0
sp|Q99733|NP1L4_HUMAN	0	1	0	0	0
sp|Q99798|ACON_HUMAN	0	1	0	1	0
sp|Q99961|SH3G1_HUMAN	0	1	0	1	0
sp|Q99962|SH3G2_HUMAN	0	1	0	1	0
sp|Q9BPX5|ARP5L_HUMAN	0	1	1	1	0
sp|Q9BRA2|TXD17_HUMAN	0	1	0	1	0
sp|Q9BSJ8|ESYT1_HUMAN	0	1	0	0	0
sp|Q9BTT0|AN32E_HUMAN	0	1	1	1	0
sp|Q9BUT1|DHRS6_HUMAN	0	1	0	1	0
sp|Q9BV40|VAMP8_HUMAN	0	1	1	1	0
sp|Q9BVA1|TBB2B_HUMAN	0	1	0	1	0
sp|Q9BWM7|SFXN3_HUMAN	0	1	0	1	0
sp|Q9BYX7|ACTBM_HUMAN	0	1	0	1	0
sp|Q9BZG1|RAB34_HUMAN	0	1	1	0	0
sp|Q9BZZ5|API5_HUMAN	0	1	0	1	0
sp|Q9C005|DPY30_HUMAN	0	1	0	1	0
sp|Q9H299|SH3L3_HUMAN	0	1	0	1	0
sp|Q9H3K6|BOLA2_HUMAN	0	1	0	1	0
sp|Q9H4A6|GOLP3_HUMAN	0	1	0	1	0
sp|Q9H788|SH24A_HUMAN	0	1	0	0	0
sp|Q9H910|JUPI2_HUMAN	0	1	0	0	0
sp|Q9H930|SP14L_HUMAN	0	1	0	1	0
sp|Q9HBL7|PLRKT_HUMAN	0	1	1	1	0
sp|Q9NPE3|NOP10_HUMAN	0	1	0	1	0
sp|Q9NQ88|TIGAR_HUMAN	0	1	0	1	0
sp|Q9NQH7|XPP3_HUMAN	0	1	0	0	0
sp|Q9NQT5|EXOS3_HUMAN	0	1	0	1	0
sp|Q9NR28|DBLOH_HUMAN	0	1	0	0	0
sp|Q9NRH3|TBG2_HUMAN	0	1	0	1	0
sp|Q9NS91|RAD18_HUMAN	0	1	0	1	0
sp|Q9NTX5|ECHD1_HUMAN	0	1	0	0	0
sp|Q9NVA2|SEP11_HUMAN	0	1	0	1	0
sp|Q9NX46|ADPRS_HUMAN	0	1	0	0	0
sp|Q9NX63|MIC19_HUMAN	0	1	0	1	0
sp|Q9NYB9|ABI2_HUMAN	0	1	0	1	0
sp|Q9NYF8|BCLF1_HUMAN	0	1	0	1	0
sp|Q9NZL9|MAT2B_HUMAN	0	1	0	1	0
sp|Q9P016|THYN1_HUMAN	0	1	0	0	0
sp|Q9P0M6|H2AW_HUMAN	0	1	0	1	0
sp|Q9P1U1|ARP3B_HUMAN	0	1	0	1	0
sp|Q9P2E9|RRBP1_HUMAN	0	1	0	1	0
sp|Q9UBE0|SAE1_HUMAN	0	1	0	0	0
sp|Q9UBQ5|EIF3K_HUMAN	0	1	0	0	0
sp|Q9UHD8|SEPT9_HUMAN	0	1	1	1	0
sp|Q9UHL4|DPP2_HUMAN	0	1	0	1	0
sp|Q9UHV9|PFD2_HUMAN	0	1	0	1	0
sp|Q9UI15|TAGL3_HUMAN	0	1	0	1	0
sp|Q9UII2|ATIF1_HUMAN	0	1	0	1	0
sp|Q9UIJ7|KAD3_HUMAN	0	1	0	1	0
sp|Q9UJS0|S2513_HUMAN	0	1	0	0	0
sp|Q9UJZ1|STML2_HUMAN	0	1	0	0	0
sp|Q9UKM9|RALY_HUMAN	0	1	0	1	0
sp|Q9ULV4|COR1C_HUMAN	0	1	0	0	0
sp|Q9UM22|EPDR1_HUMAN	0	1	0	1	0
sp|Q9UMY4|SNX12_HUMAN	0	1	0	1	0
sp|Q9UPN3|MACF1_HUMAN	0	1	0	0	0
sp|Q9UQ35|SRRM2_HUMAN	0	1	0	0	0
sp|Q9UQ80|PA2G4_HUMAN	0	1	0	1	0
sp|Q9Y2Z0|SGT1_HUMAN	0	1	0	1	0
sp|Q9Y3D6|FIS1_HUMAN	0	1	0	1	0
sp|Q9Y3F4|STRAP_HUMAN	0	1	0	1	0
sp|Q9Y3I0|RTCB_HUMAN	0	1	0	1	0
sp|Q9Y3U8|RL36_HUMAN	0	1	0	1	0
sp|Q9Y3Y2|CHTOP_HUMAN	0	1	0	1	0
sp|Q9Y3Z3|SAMH1_HUMAN	0	1	1	0	0
sp|Q9Y5B9|SP16H_HUMAN	0	1	0	0	0
sp|Q9Y5L4|TIM13_HUMAN	0	1	1	1	0
sp|Q9Y5S9|RBM8A_HUMAN	0	1	0	1	0
sp|Q9Y5X3|SNX5_HUMAN	0	1	0	1	0
sp|Q9Y6N5|SQOR_HUMAN	0	1	1	1	0
sp|Q9Y6W5|WASF2_HUMAN	0	1	0	0	0
sp|O00154|BACH_HUMAN	0	0	1	1	0
sp|P13804|ETFA_HUMAN	0	0	1	0	0
sp|P21796|VDAC1_HUMAN	0	0	1	0	0
sp|P48735|IDHP_HUMAN	0	0	1	0	0
sp|P50213|IDH3A_HUMAN	0	0	1	0	0
sp|P53634|CATC_HUMAN	0	0	1	1	0
sp|P55263|ADK_HUMAN	0	0	1	1	0
sp|Q02978|M2OM_HUMAN	0	0	1	0	0
sp|Q8IVF2|AHNK2_HUMAN	0	0	1	0	0
sp|Q99715|COCA1_HUMAN	0	0	1	0	0
sp|Q9BUF5|TBB6_HUMAN	0	0	1	0	0
sp|Q9P2K5|MYEF2_HUMAN	0	0	1	1	0
sp|Q9UKK3|PARP4_HUMAN	0	0	1	1	0
sp|A1X283|SPD2B_HUMAN	0	0	0	1	0
sp|O00193|SMAP_HUMAN	0	0	0	1	0
sp|O00291|HIP1_HUMAN	0	0	0	1	0
sp|O00303|EIF3F_HUMAN	0	0	0	1	0
sp|O00330|ODPX_HUMAN	0	0	0	1	0
sp|O00429|DNM1L_HUMAN	0	0	0	1	0
sp|O00534|VMA5A_HUMAN	0	0	0	1	0
sp|O14773|TPP1_HUMAN	0	0	0	1	0
sp|O14874|BCKD_HUMAN	0	0	0	1	0
sp|O14879|IFIT3_HUMAN	0	0	0	1	0
sp|O15347|HMGB3_HUMAN	0	0	0	1	0
sp|O15372|EIF3H_HUMAN	0	0	0	1	0
sp|O43818|U3IP2_HUMAN	0	0	0	1	0
sp|O60701|UGDH_HUMAN	0	0	0	1	0
sp|O60762|DPM1_HUMAN	0	0	0	1	0
sp|O60832|DKC1_HUMAN	0	0	0	1	0
sp|O60869|EDF1_HUMAN	0	0	0	1	0
sp|O60936|NOL3_HUMAN	0	0	0	1	0
sp|O75410|TACC1_HUMAN	0	0	0	1	0
sp|O75436|VP26A_HUMAN	0	0	0	1	0
sp|O75506|HSBP1_HUMAN	0	0	0	1	0
sp|O75694|NU155_HUMAN	0	0	0	1	0
sp|O75821|EIF3G_HUMAN	0	0	0	1	0
sp|O94919|ENDD1_HUMAN	0	0	0	1	0
sp|O95202|LETM1_HUMAN	0	0	0	1	0
sp|O95352|ATG7_HUMAN	0	0	0	1	0
sp|P00390|GSHR_HUMAN	0	0	0	1	0
sp|P02452|CO1A1_HUMAN	0	0	0	1	0
sp|P02749|APOH_HUMAN	0	0	0	1	0
sp|P06454|PTMA_HUMAN	0	0	0	1	0
sp|P09525|ANXA4_HUMAN	0	0	0	1	0
sp|P09960|LKHA4_HUMAN	0	0	0	1	0
sp|P0C0L4|CO4A_HUMAN	0	0	0	1	0
sp|P11387|TOP1_HUMAN	0	0	0	1	0
sp|P11802|CDK4_HUMAN	0	0	0	1	0
sp|P12268|IMDH2_HUMAN	0	0	0	1	0
sp|P16278|BGAL_HUMAN	0	0	0	1	0
sp|P18621|RL17_HUMAN	0	0	0	1	0
sp|P18859|ATP5J_HUMAN	0	0	0	1	0
sp|P19474|RO52_HUMAN	0	0	0	1	0
sp|P20810|ICAL_HUMAN	0	0	0	1	0
sp|P22033|MUTA_HUMAN	0	0	0	1	0
sp|P22314|UBA1_HUMAN	0	0	0	1	0
sp|P23193|TCEA1_HUMAN	0	0	0	1	0
sp|P23470|PTPRG_HUMAN	0	0	0	1	0
sp|P24539|AT5F1_HUMAN	0	0	0	1	0
sp|P25208|NFYB_HUMAN	0	0	0	1	0
sp|P30519|HMOX2_HUMAN	0	0	0	1	0
sp|P30520|PURA2_HUMAN	0	0	0	1	0
sp|P31146|COR1A_HUMAN	0	0	0	1	0
sp|P31946|1433B_HUMAN	0	0	0	1	0
sp|P33316|DUT_HUMAN	0	0	0	1	0
sp|P34949|MPI_HUMAN	0	0	0	1	0
sp|P35637|FUS_HUMAN	0	0	0	1	0
sp|P36578|RL4_HUMAN	0	0	0	1	0
sp|P41091|IF2G_HUMAN	0	0	0	1	0
sp|P41219|PERI_HUMAN	0	0	0	1	0
sp|P41226|UBA7_HUMAN	0	0	0	1	0
sp|P41236|IPP2_HUMAN	0	0	0	1	0
sp|P42892|ECE1_HUMAN	0	0	0	1	0
sp|P46459|NSF_HUMAN	0	0	0	1	0
sp|P46781|RS9_HUMAN	0	0	0	1	0
sp|P46782|RS5_HUMAN	0	0	0	1	0
sp|P47224|MSS4_HUMAN	0	0	0	1	0
sp|P47756|CAPZB_HUMAN	0	0	0	1	0
sp|P47914|RL29_HUMAN	0	0	0	1	0
sp|P47985|UCRI_HUMAN	0	0	0	1	0
sp|P49257|LMAN1_HUMAN	0	0	0	1	0
sp|P49458|SRP09_HUMAN	0	0	0	1	0
sp|P49755|TMEDA_HUMAN	0	0	0	1	0
sp|P49959|MRE11_HUMAN	0	0	0	1	0
sp|P50552|VASP_HUMAN	0	0	0	1	0
sp|P51397|DAP1_HUMAN	0	0	0	1	0
sp|P51812|KS6A3_HUMAN	0	0	0	1	0
sp|P51858|HDGF_HUMAN	0	0	0	1	0
sp|P52815|RM12_HUMAN	0	0	0	1	0
sp|P53597|SUCA_HUMAN	0	0	0	1	0
sp|P53621|COPA_HUMAN	0	0	0	1	0
sp|P54725|RD23A_HUMAN	0	0	0	1	0
sp|P55795|HNRH2_HUMAN	0	0	0	1	0
sp|P57764|GSDMD_HUMAN	0	0	0	1	0
sp|P60660|MYL6_HUMAN	0	0	0	1	0
sp|P61086|UBE2K_HUMAN	0	0	0	1	0
sp|P62304|RUXE_HUMAN	0	0	0	1	0
sp|P62701|RS4X_HUMAN	0	0	0	1	0
sp|P62937|PPIA_HUMAN	0	0	0	1	0
sp|P63027|VAMP2_HUMAN	0	0	0	1	0
sp|P63151|2ABA_HUMAN	0	0	0	1	0
sp|P78417|GSTO1_HUMAN	0	0	0	1	0
sp|P80723|BASP1_HUMAN	0	0	0	1	0
sp|P85037|FOXK1_HUMAN	0	0	0	1	0
sp|P98179|RBM3_HUMAN	0	0	0	1	0
sp|Q00688|FKBP3_HUMAN	0	0	0	1	0
sp|Q01518|CAP1_HUMAN	0	0	0	1	0
sp|Q02818|NUCB1_HUMAN	0	0	0	1	0
sp|Q02880|TOP2B_HUMAN	0	0	0	1	0
sp|Q05655|KPCD_HUMAN	0	0	0	1	0
sp|Q07955|SRSF1_HUMAN	0	0	0	1	0
sp|Q08AM6|VAC14_HUMAN	0	0	0	1	0
sp|Q12765|SCRN1_HUMAN	0	0	0	1	0
sp|Q12906|ILF3_HUMAN	0	0	0	1	0
sp|Q13144|EI2BE_HUMAN	0	0	0	1	0
sp|Q13177|PAK2_HUMAN	0	0	0	1	0
sp|Q13347|EIF3I_HUMAN	0	0	0	1	0
sp|Q13451|FKBP5_HUMAN	0	0	0	1	0
sp|Q13561|DCTN2_HUMAN	0	0	0	1	0
sp|Q14683|SMC1A_HUMAN	0	0	0	1	0
sp|Q15063|POSTN_HUMAN	0	0	0	1	0
sp|Q15075|EEA1_HUMAN	0	0	0	1	0
sp|Q15365|PCBP1_HUMAN	0	0	0	1	0
sp|Q15532|SSXT_HUMAN	0	0	0	1	0
sp|Q15717|ELAV1_HUMAN	0	0	0	1	0
sp|Q15785|TOM34_HUMAN	0	0	0	1	0
sp|Q16543|CDC37_HUMAN	0	0	0	1	0
sp|Q16610|ECM1_HUMAN	0	0	0	1	0
sp|Q16769|QPCT_HUMAN	0	0	0	1	0
sp|Q3KQU3|MA7D1_HUMAN	0	0	0	1	0
sp|Q53GS9|UBP39_HUMAN	0	0	0	1	0
sp|Q5JTV8|TOIP1_HUMAN	0	0	0	1	0
sp|Q5PSV4|BRM1L_HUMAN	0	0	0	1	0
sp|Q6QNY1|BL1S2_HUMAN	0	0	0	1	0
sp|Q6XQN6|PNCB_HUMAN	0	0	0	1	0
sp|Q7Z7H5|TMED4_HUMAN	0	0	0	1	0
sp|Q86UP2|KTN1_HUMAN	0	0	0	1	0
sp|Q86X10|RLGPB_HUMAN	0	0	0	1	0
sp|Q8IWB7|WDFY1_HUMAN	0	0	0	1	0
sp|Q8IYI6|EXOC8_HUMAN	0	0	0	1	0
sp|Q8NCW5|NNRE_HUMAN	0	0	0	1	0
sp|Q8NI27|THOC2_HUMAN	0	0	0	1	0
sp|Q8TED1|GPX8_HUMAN	0	0	0	1	0
sp|Q8WTS6|SETD7_HUMAN	0	0	0	1	0
sp|Q8WUD6|CHPT1_HUMAN	0	0	0	1	0
sp|Q8WUM4|PDC6I_HUMAN	0	0	0	1	0
sp|Q969X5|ERGI1_HUMAN	0	0	0	1	0
sp|Q96AB3|ISOC2_HUMAN	0	0	0	1	0
sp|Q96HE7|ERO1A_HUMAN	0	0	0	1	0
sp|Q96HS1|PGAM5_HUMAN	0	0	0	1	0
sp|Q96HY6|DDRGK_HUMAN	0	0	0	1	0
sp|Q96RT1|ERBIN_HUMAN	0	0	0	1	0
sp|Q96SZ5|AEDO_HUMAN	0	0	0	1	0
sp|Q96TA1|NIBA2_HUMAN	0	0	0	1	0
sp|Q99714|HCD2_HUMAN	0	0	0	1	0
sp|Q99832|TCPH_HUMAN	0	0	0	1	0
sp|Q9BQ04|RBM4B_HUMAN	0	0	0	1	0
sp|Q9BR76|COR1B_HUMAN	0	0	0	1	0
sp|Q9BTZ2|DHRS4_HUMAN	0	0	0	1	0
sp|Q9BX68|HINT2_HUMAN	0	0	0	1	0
sp|Q9BXK5|B2L13_HUMAN	0	0	0	1	0
sp|Q9BY32|ITPA_HUMAN	0	0	0	1	0
sp|Q9BY67|CADM1_HUMAN	0	0	0	1	0
sp|Q9BYG4|PAR6G_HUMAN	0	0	0	1	0
sp|Q9GZT3|SLIRP_HUMAN	0	0	0	1	0
sp|Q9H0B6|KLC2_HUMAN	0	0	0	1	0
sp|Q9NR56|MBNL1_HUMAN	0	0	0	1	0
sp|Q9NRN5|OLFL3_HUMAN	0	0	0	1	0
sp|Q9NSE4|SYIM_HUMAN	0	0	0	1	0
sp|Q9NTZ6|RBM12_HUMAN	0	0	0	1	0
sp|Q9NUQ6|SPS2L_HUMAN	0	0	0	1	0
sp|Q9NYJ1|COA4_HUMAN	0	0	0	1	0
sp|Q9P0L0|VAPA_HUMAN	0	0	0	1	0
sp|Q9UBQ0|VPS29_HUMAN	0	0	0	1	0
sp|Q9UHQ9|NB5R1_HUMAN	0	0	0	1	0
sp|Q9UI12|VATH_HUMAN	0	0	0	1	0
sp|Q9UJ70|NAGK_HUMAN	0	0	0	1	0
sp|Q9UJU6|DBNL_HUMAN	0	0	0	1	0
sp|Q9UK22|FBX2_HUMAN	0	0	0	1	0
sp|Q9UK45|LSM7_HUMAN	0	0	0	1	0
sp|Q9UKK9|NUDT5_HUMAN	0	0	0	1	0
sp|Q9UL12|SARDH_HUMAN	0	0	0	1	0
sp|Q9UMS4|PRP19_HUMAN	0	0	0	1	0
sp|Q9UN86|G3BP2_HUMAN	0	0	0	1	0
sp|Q9UNZ2|NSF1C_HUMAN	0	0	0	1	0
sp|Q9UQB8|BAIP2_HUMAN	0	0	0	1	0
sp|Q9Y305|ACOT9_HUMAN	0	0	0	1	0
sp|Q9Y5A9|YTHD2_HUMAN	0	0	0	1	0
sp|Q9Y5J7|TIM9_HUMAN	0	0	0	1	0
sp|Q9Y6Y8|S23IP_HUMAN	0	0	0	1	0
sp|P06732|KCRM_HUMAN	0	0	0	0	1
sp|P06753|TPM3_HUMAN	0	0	0	0	1
sp|Q13231|CHIT1_HUMAN	0	0	0	0	1
sp|Q8NDA2|HMCN2_HUMAN	0	0	0	0	1
sp|Q9UKX2|MYH2_HUMAN	0	0	0	0	1

## Sheet: TPD_dis_patient_representations
Supp.Data6.Tab3 The patient representation with MCP-based features (concatenate the views) for the TPD_dis data
22.78515508	22.13484534	22.8861996	21.02274686	22.48286176	25.89063666	29.49833697	30.51186637	24.18901807	24.26564262	29.78007457	27.40739166	24.584747	0	23.60382071	21.618773	23.52894752	22.37462085	23.96512221	26.34938172	02	23.32061894	22.87010232	20.13028058	21.22049549	24.03946607	23.61274788	31.50848713	23.67946831	20.75331602	31.90857114	22.00648766	03	25.26061532	17.85657906	21.6333411	19.21695612	19.73486413	21.56064464	23.7359714	17.38939603	22.02911568	04	18.89612775	22.79759873	24.18958185	19.70352439	23.40594259	05	20.81149951
23.3467	19.0541	0	0	20.9907	27.6	36.4494	31.7511	26.0178	26.3707	29.0873	0	23.3596	27.5644	25.1277	0	24.6456	22.2354	25.2781	25.9898	0	22.1901	23.4937	0	22.9072	0	0	33.3497	23.9294	23.1659	33.6901	0	24.75	26.9391	19.7333	0	18.1386	20.8793	22.6164	27.2951	24.9084	0	24.8392	20.9374	23.3303	23.9457	0	22.2971	0	0
19.1113	20.1136	0	0	19.2083	25.4005	31.1028	29.7358	25.3357	24.591	27.1744	0	24.1995	26.5411	24.614	0	24.8451	21.5039	24.9091	22.798	20.8782	23.075	21.1178	0	21.4252	20.1635	22.3579	31.4494	23.4039	21.5205	31.6652	20.6101	0	27.4581	0	18.2471	17.3846	18.2015	20.9462	26.4919	21.0294	0	20.8218	20.3582	22.6466	21.2318	0	21.7997	18.9494	0
27.7169	0	17.1527	16.9217	23.4046	29.3227	38.2159	33.6979	26.6242	28.2695	27.9118	0	23.326	27.5391	28.4848	0	26.3139	25.4889	26.4411	31.2487	23.5973	21.8598	24.7452	0	25.5748	21.6765	0	34.7581	27.7375	23.5164	35.1754	22.6221	28.2817	29.9148	20.6958	19.3378	17.9692	23.8176	24.4258	28.6476	28.3839	0	26.432	22.7365	24.6439	0	21.8142	20.7242	0	20.0764
25.4472	22.8728	19.2849	22.5131	0	24.3991	34.7548	28.7158	24.101	22.8505	32.1445	0	23.371	22.3253	21.3079	23.4475	22.5553	24.296	23.6215	27.338	22.2903	25.595	0	24.4614	23.637	24.0705	21.8628	29.8247	22.0046	20.3849	30.3443	0	0	27.4436	22.718	22.397	21.6016	21.4538	22.7028	23.0803	24.6075	23.4916	21.2159	22.0179	0	20.7358	0	23.2179	20.9506	21.5676
25.117	22.4008	20.6213	21.8076	0	26.4603	32.9903	30.7364	23.6501	24.8893	30.5276	0	23.8414	24.6218	23.4507	22.2012	23.4486	22.3194	23.1953	26.3363	21.6382	23.7386	21.5042	20.3244	21.8908	23.8673	24.3547	32.0359	22.7309	0	32.4849	23.9904	19.0783	26.9878	18.4448	22.1234	19.1564	21.4324	22.8393	23.4981	24.8604	21.5626	24.4182	21.1641	0	24.0768	19.2345	22.9644	19.3272	22.7186
20.5433	19.2842	20.7957	0	23.4568	24.1783	33.2483	28.6958	20.9393	22.8927	26.6302	21.1867	24.9453	28.2083	24.6446	21.1725	0	23.4596	22.9344	25.0857	20.7159	21.3847	23.0527	23.9226	21.5778	21.1012	23.2951	29.8754	20.9893	0	30.5316	0	0	27.3584	17.4245	21.1573	16.9805	0	21.9087	24.0537	23.2097	21.6687	21.2009	20.0506	21.5735	23.3512	0	22.6661	20.0748	21.6787
26.6375	0	0	0	23.137	28.3437	38.1123	32.7699	25.9328	27.1412	27.5629	0	23.6782	26.0677	27.7869	23.5558	25.5062	25.8934	25.631	29.307	23.7233	0	25.7653	0	24.6303	22.1022	0	34.0272	25.416	0	34.3179	0	26.8633	28.587	19.8113	0	19.4249	23.8169	24.4708	27.666	26.8658	0	25.0293	21.6517	23.9989	22.5916	21.6475	19.3707	0	20.0864
19.9505	0	0	19.6887	0	23.8432	37.7026	28.6334	0	22.7982	25.5783	0	23.1091	25.7564	27.737	0	0	23.8879	0	28.107	22.7105	20.4449	24.2734	22.405	23.6286	0	0	30.5292	0	0	30.3884	0	22.4688	25.743	20.1357	19.6817	19.4704	26.182	22.1802	26.478	27.9611	0	22.9553	21.9984	22.4941	0	0	20.1319	0	0
26.263	0	0	0	23.3048	27.0104	37.7839	31.6972	24.3624	25.5158	26.9519	0	23.5016	27.8863	27.418	0	24.3244	25.8224	24.0216	28.2251	22.2788	20.7334	25.5353	20.893	24.0713	22.7047	0	33.079	26.5688	22.2935	33.3676	0	24.5261	29.0117	0	0	17.8636	22.9507	24.4297	26.7443	27.0264	0	23.9718	22.529	22.6693	23.1407	19.432	20.7163	0	19.8774
22.5997	21.859	22.9362	20.4388	21.7199	27.6675	33.0483	32.0138	25.0669	26.0076	30.8354	0	23.9758	26.1118	23.1753	22.5176	25.0111	21.053	25.0501	26.374	21.4364	24.0791	23.1423	21.1394	22.5425	23.3392	23.2191	33.1161	25.6732	21.5833	33.8403	20.4905	0	26.3168	0	21.5371	19.4033	21.2382	22.283	23.2135	23.9582	21.8813	21.9062	22.0595	0	27.2451	0	23.7485	20.0064	21.5926
19.4115	18.3409	0	0	20.8981	24.9321	30.3711	29.9868	23.0188	24.1222	26.6092	19.9367	24.0023	27.8324	24.7714	0	22.3901	23.8629	22.0975	24.3127	22.5783	0	27.8574	0	22.1004	0	0	31.3061	22.8918	0	31.4138	0	0	28.8361	16.3661	19.3818	17.8652	19.4322	23.3643	27.4737	19.4398	0	0	21.8125	23.1375	19.8051	18.5912	20.9649	19.647	0
23.0496	0	19.7956	0	21.3294	28.918	34.4311	33.2608	26.5014	27.9501	28.4115	20.9092	23.048	28.1921	25.6952	0	26.1408	24.6336	26.0579	27.2541	21.6133	21.1012	23.5616	0	21.6827	21.6959	0	34.7342	26.8261	22.4836	35.0128	20.3348	21.9719	28.3258	0	18.7815	17.0665	20.7856	23.771	28.1623	24.0295	19.4891	22.4096	22.4626	24.649	23.2545	20.7152	22.2906	0	0
22.4922	0	0	0	0	27.2863	37.8908	32.1878	26.7578	26.5702	28.1248	0	22.9265	27.207	26.1847	0	26.1266	24.1784	26.1085	25.4473	22.824	0	24.6358	0	22.5194	0	0	33.6156	28.5926	25.4731	34.4998	24.3964	25.8131	28.401	21.4605	0	0	23.9549	23.1975	25.8227	27.3065	0	23.1252	22.3027	21.1117	0	18.4002	0	0	0
27.194	20.7518	0	19.3058	20.4197	25.8507	35.6731	29.3733	23.3231	24.1512	28.0139	0	23.7113	27.144	25.9922	0	22.9801	24.3575	22.6895	28.9545	20.6049	21.8515	23.7799	19.8709	24.6125	22.2041	23.2203	30.9537	22.3856	21.9211	30.9602	19.423	22.3261	27.7648	0	20.9161	18.1578	23.1557	22.8305	23.688	26.2462	20.8671	23.0721	21.1524	0	26.1284	0	22.2534	0	20.662
23.0274	21.9558	22.3875	21.8731	0	25.0016	30.2634	29.6422	23.2368	23.6891	31.7036	0	24.2859	25.2415	22.7471	24.5356	22.5373	0	22.4429	25.1962	0	24.541	0	22.921	21.3449	24.1742	25.2433	30.67	22.2115	19.8265	31.2768	23.118	0	25.6217	18.5923	21.3497	20.789	19.5667	22.1544	22.8839	20.126	21.8338	21.6808	19.9805	20.9125	25.9367	0	24.025	19.5818	22.5824
25.4734	0	0	0	23.9362	27.5279	37.081	32.1154	25.2048	26.386	27.2515	0	23.94	27.6841	27.5254	0	25.1474	25.2167	24.5408	27.8337	22.9659	0	25.0841	22.9325	23.0968	22.323	0	33.5377	23.2059	0	33.8061	22.0502	24.333	29.0703	0	19.18	17.7018	23.4711	24.2487	28.2221	26.4346	0	24.1844	22.2258	24.0866	20.6329	18.496	22.474	0	20.4589
24.0716	0	0	0	22.3419	24.7185	30.013	28.7284	23.4762	23.8218	27.4336	0	24.131	24.5893	24.3824	22.0366	22.4275	23.5163	23.0449	25.1945	21.8902	20.1683	25.3095	0	23.0413	23.6753	23.8567	30.4983	23.7548	22.0851	30.7278	21.3623	22.5988	28.5956	0	20.9921	20.1705	21.9285	23.8536	25.7174	21.9945	21.3803	24.425	22.7689	23.3762	22.8519	21.5715	21.813	19.7043	20.9247
27.1079	19.0346	17.9566	0	21.8055	27.5727	37.5211	31.7462	24.8809	26.1596	27.0188	0	23.1215	28.0203	25.1746	0	24.712	22.7138	24.2972	28.1815	21.6043	22.7385	24.1657	0	24.1405	21.8447	21.4641	33.3479	22.423	0	33.5249	0	21.1595	28.6622	0	20.9762	19.2757	23.3128	22.1281	23.9702	27.4346	21.4699	24.1616	23.0372	21.029	25.7384	0	21.183	0	19.6039
0	19.2324	0	0	0	27.0573	33.6872	31.157	24.3463	25.0305	27.9081	0	23.5858	25.1854	26.3564	0	24.73	23.5667	25.1037	27.9246	0	0	24.3281	0	21.6891	0	26.4142	33.0684	24.5029	21.9531	33.6407	0	24.0818	26.7168	0	20.9452	0	21.9538	22.5845	29.0778	23.7012	21.1529	23.5191	21.2022	23.5062	21.6047	0	24.325	0	0
27.7102	0	0	0	23.8162	28.1487	38.7787	31.8925	24.9929	26.0933	26.8264	0	23.2971	27.543	28.3727	0	24.6703	25.6512	23.7266	29.8992	23.2149	0	26.3974	0	26.1496	21.9291	0	33.8008	24.6239	21.0188	33.9307	0	25.6465	29.5626	0	0	18.4529	24.8978	24.0402	28.7961	28.6729	0	26.9652	22.5571	24.8535	21.5214	20.9497	21.5238	0	20.9543
24.6317	20.735	0	0	22.7116	28.1101	35.0765	31.8219	25.7395	26.7445	28.6243	0	23.9609	24.7929	26.4995	0	25.712	24.8927	25.3315	27.2132	22.1463	21.8432	24.2335	19.6228	22.9653	22.7197	24.9947	33.3109	24.8833	21.6958	33.6317	19.244	20.5699	28.0886	0	22.8356	18.9243	20.9668	24.6439	26.065	25.3864	23.8428	23.1103	22.2101	21.246	24.3668	20.8301	21.0758	0	20.0972
26.3196	19.6674	19.9965	17.5602	0	24.1551	34.9208	28.6079	22.0563	23.5644	25.3459	21.6464	22.9314	26.4478	24.084	21.6464	22.3884	19.3114	21.2905	27.6267	0	25.0606	21.7377	22.122	23.0647	21.0583	21.3365	30.0162	24.2808	23.3838	30.256	0	20.1663	27.5729	0	21.4176	16.6814	22.301	21.2483	23.3646	25.6391	21.199	22.7964	21.7269	22.4743	21.4685	25.7472	22.4811	19.2447	19.5059
23.9192	22.0008	20.8772	22.0308	20.8162	24.1658	31.037	28.6715	21.7563	22.2299	31.1927	30.0529	24.0655	22.6468	21.7684	23.0029	23.088	22.5327	0	26.9222	0	24.6057	22.2508	26.3292	20.823	23.8697	24.2273	29.9114	25.3878	0	30.4203	24.218	0	27.3133	19.4279	22.2159	20.7301	20.9199	20.0703	24.4738	20.1714	22.1126	20.4861	20.346	0	24.7478	0	23.4311	19.3379	21.543
22.4263	0	19.1598	0	23.426	27.5302	37.4083	31.6927	25.1878	26.0086	26.5635	0	23.3472	27.4505	26.7933	18.6886	25.1628	24.6324	25.0556	26.315	23.3058	0	25.8806	0	22.628	0	0	33.3125	25.5345	22.8645	33.7238	19.4191	21.7329	28.6398	21.8706	0	18.6725	22.7359	23.0195	27.8917	25.3337	0	23.7034	22.307	23.6466	0	0	20.6593	17.7632	20.8914
25.2758	22.0849	22.1971	22.3981	20.5646	23.4672	37.0582	28.384	24.2276	22.8282	31.3241	0	23.5533	0	23.4577	23.0579	22.0017	0	21.2352	28.774	0	26.3663	22.1464	22.9024	23.0283	24.1842	23.8928	29.932	21.6968	0	30.2502	22.8396	0	26.6596	0	21.7239	20.6545	25.0935	22.1163	24.9202	26.4443	21.8076	23.2182	20.5404	21.8502	26.0506	0	24.0067	0	21.7875
22.709	19.2622	0	0	22.4883	26.9882	35.0395	31.3252	24.154	24.9624	28.0267	0	23.0638	26.3656	26.6678	0	23.9549	25.3301	24.1432	28.2052	23.258	0	23.3906	0	23.3354	22.8788	24.4301	32.456	22.794	22.4754	33.1353	0	20.883	27.7153	0	20.7181	19.795	21.6063	22.9367	27.0037	24.4274	18.4026	24.1633	22.2894	22.8136	25.9563	22.1377	22.894	19.7114	20.1003
21.2341	20.0257	19.2878	0	21.9545	24.2251	32.5743	28.7565	22.3442	22.6564	29.2318	0	22.4324	27.4685	24.3127	0	21.7055	19.8664	20.6378	25.254	18.5563	23.6614	0	0	21.0938	20.1939	24.9695	30.7752	20.3782	0	30.5037	0	0	28.1897	0	22.1082	19.1875	20.4421	20.6684	24.3776	22.5525	22.0729	20.8308	20.2732	21.6348	24.5227	23.2967	22.9398	19.5707	20.1321
0	19.3225	0	0	0	26.3803	36.3101	30.8022	23.3398	24.5629	25.8962	24.5988	24.0715	26.8108	24.3383	0	23.4091	24.9432	23.018	27.8445	22.1041	0	0	0	23.0548	0	23.3674	32.302	23.9893	0	32.5736	0	25.4081	28.2762	0	21.0878	0	24.0884	21.8377	26.0817	27.0272	20.7512	24.8343	20.7134	19.9163	0	0	22.9383	19.3939	0
24.6501	0	0	0	19.8299	22.8636	34.2709	29.257	22.517	22.8676	25.7483	0	23.2462	24.8802	22.9403	0	22.0726	0	21.4363	26.9336	0	21.0382	23.4878	21.4518	22.622	21.495	26.0753	30.6982	21.7979	0	30.8854	0	0	27.8195	0	22.4922	0	22.5816	0	23.9119	24.0372	21.6386	22.5369	21.9338	19.7509	21.8397	23.545	22.6258	20.1306	0
0	18.6898	0	0	20.6662	25.6126	37.0456	30.2093	23.0458	24.4695	26.4125	24.1909	23.3472	26.7908	26.1186	0	22.7001	23.0323	22.4812	26.7925	0	19.692	23.5648	23.1187	23.1991	0	26.4342	31.7341	25.3828	21.6961	31.9301	0	26.1276	28.0232	19.4383	20.8513	0	25.1687	20.1587	25.9021	26.1793	20.4296	25.5761	0	0	0	0	21.8797	19.5368	0
25.3513	0	0	0	24.385	27.1694	37.6665	31.9006	25.1278	25.7021	26.4481	21.8898	23.1945	25.9306	27.9671	0	24.5522	24.5952	24.4859	29.4062	22.6751	0	25.1451	0	23.4893	0	0	33.7627	26.1994	24.3114	34.1221	0	26.8763	28.4211	0	0	0	23.9335	23.1361	27.3361	29.0232	0	24.2564	22.6196	23.1155	0	0	21.3014	0	0
21.3916	22.1411	23.1751	20.8459	0	25.01	29.8136	29.7533	23.5042	24.6973	30.0597	0	24.421	23.502	22.5007	24.6436	23.006	20.5269	23.1936	27.418	0	25.7971	19.9532	0	21.321	23.8148	23.8529	31.1342	21.3053	0	31.3973	0	0	26.6772	0	21.3017	19.0382	0	20.8617	22.9716	19.9129	22.1819	0	21.4217	22.3031	25.7451	18.1521	24.7024	19.8917	23.7445
23.3807	0	0	0	22.5646	29.3708	38.7781	33.1443	26.9579	28.5132	28.7623	25.3002	23.6249	27.9928	27.4923	0	26.8995	24.6887	26.5945	27.2305	0	23.7482	24.729	22.6316	23.1987	0	0	34.7481	27.5808	24.3731	35.1497	0	23.7624	28.2713	0	0	0	23.4134	0	25.6853	28.2572	0	25.225	0	22.6887	22.3665	0	0	0	0
27.8417	0	23.2607	0	22.9967	27.9561	37.5938	32.0242	25.1726	26.9684	27.5148	0	23.7712	28.1185	28.1768	0	25.0852	25.2535	24.5356	28.3044	23.1945	21.6709	25.1647	0	24.5664	21.4299	0	33.6784	25.2932	22.2098	34.0431	19.4349	24.9785	28.8898	0	21.4766	0	23.6305	24.3087	27.4432	28.0572	0	25.3249	22.4607	23.4567	20.5225	21.8328	21.0753	0	20.8474
21.0877	22.3888	23.213	22.1257	0	24.3104	28.4471	28.9472	24.6384	23.0725	31.6534	0	23.4337	0	19.7995	23.9657	22.313	0	22.1365	24.8231	0	24.6008	26.2968	25.0311	20.5821	23.8845	23.4084	30.5394	21.3345	0	30.7645	25.5255	0	27.4819	19.8489	23.0881	18.7604	18.9563	21.0192	24.6768	0	20.7755	0	0	0	23.5255	0	24.494	20.6495	22.7614
25.7342	0	0	22.7513	25.0216	27.1802	35.9995	31.3102	24.8747	25.7994	27.3102	0	23.3017	26.5246	26.9257	0	24.8114	24.3565	24.8974	27.6384	22.8317	22.2704	24.2546	0	23.526	22.9415	23.9225	32.9362	24.3611	20.2645	33.4502	21.1654	22.8072	28.2541	0	20.2312	16.7672	22.8687	23.7268	26.9797	25.0815	20.5531	24.3799	21.4212	23.1833	23.8928	20.9116	21.7788	20.192	0
24.8228	0	0	0	22.4328	27.4139	37.1742	32.0644	26.1512	27.0064	27.6238	0	23.7085	26.941	27.0142	0	25.4592	25.3475	25.6233	26.9721	23.6325	21.7194	24.1555	0	22.4751	21.8229	24.0455	32.9498	24.8904	23.9443	33.5686	0	22.5655	28.6359	0	0	18.5488	20.7797	23.737	26.7758	26.1794	16.7782	24.166	22.4255	23.4445	23.033	26.4142	22.1925	19.9102	20.8199
22.3746	19.7482	0	18.7079	0	22.4597	32.8124	27.3799	0	21.9448	26.218	0	21.352	25.3616	24.8635	0	22.2673	0	19.1011	25.9022	0	19.6697	24.7315	0	21.4893	21.212	24.1471	28.8731	21.0093	0	29.2986	22.5313	17.816	27.3835	0	21.9797	17.9986	21.6184	19.8972	25.042	22.9954	21.2137	21.1213	18.7711	19.8582	22.8203	0	23.8045	20.6122	20.9377
23.6195	0	0	0	0	23.7782	38.0246	28.0355	0	22.6512	25.735	0	23.5315	27.4548	26.6088	0	21.2226	24.0217	26.8373	26.3562	20.9289	23.9034	23.9345	19.4302	23.5407	0	0	29.927	21.3784	0	30.1257	0	21.0053	27.8995	21.1422	0	0	23.3602	21.5997	25.9368	27.3958	0	24.0902	21.4021	20.7534	23.5486	0	21.9871	0	21.6447
24.0228	0	0	0	20.6908	25.616	33.576	30.1899	23.278	24.0901	25.993	0	23.0143	27.0838	24.4639	0	23.1306	24.0918	22.7828	28.8374	22.3266	22.9147	21.7634	0	22.6746	21.7195	22.6548	31.1304	23.7891	0	31.6741	0	21.5274	27.8393	0	21.1847	19.6864	19.6496	22.756	23.8188	23.026	22.6289	23.2698	22.6486	0	25.0442	23.4104	22.2049	20.8775	19.0047
21.3215	0	0	0	18.8036	24.1454	35.5483	28.4299	22.6659	21.6481	25.2938	0	23.1226	28.4694	25.6559	0	23.1937	24.2622	23.3862	26.6261	21.4873	22.6534	22.7882	0	22.5074	20.9603	22.1758	30.4018	22.0019	18.6055	30.602	0	18.9896	29.0178	0	20.0197	17.3628	20.7524	22.0675	28.439	24.5298	0	23.3212	21.8625	24.4571	26.0742	21.5193	21.4895	0	20.0232
24.7851	22.3561	20.8619	20.9092	21.6941	24.2374	33.6214	28.8058	22.4454	22.934	27.9103	0	23.1212	24.614	22.7326	23.6312	24.8458	23.4196	22.1052	25.173	22.0711	24.5972	23.1792	21.1504	23.1032	23.9639	25.5373	30.3764	22.3223	0	30.6694	0	0	27.4023	0	22.269	22.9388	20.8473	21.9643	25.3508	25.5732	22.6219	22.4507	21.1802	22.355	23.2717	20.7079	23.5396	19.2892	21.8306
26.5644	18.6159	0	0	25.3216	26.8623	36.631	31.2648	24.0146	25.0256	27.1011	0	21.1548	26.8488	24.7033	0	23.8378	23.9131	23.6435	29.3062	21.929	23.3415	22.2284	0	23.9586	24.0613	24.0291	32.3857	23.3325	21.0651	33.0491	0	20.2833	27.265	20.0092	21.021	18.4266	23.2734	21.922	23.9359	26.3796	21.1998	22.9747	20.774	23.3012	25.52	24.3635	21.0049	0	17.9658
25.8736	0	0	17.3911	20.6461	26.4735	35.0112	31.314	24.7335	25.5311	27.3506	0	22.2221	28.4115	26.126	0	24.5686	25.9289	24.5813	27.4266	22.7414	23.4676	27.0065	0	24.848	21.8311	24.1458	32.7512	25.3683	0	33.1526	0	21.1185	27.9311	0	21.1335	17.5114	20.9724	22.0116	25.1205	24.8535	19.1322	22.5383	21.8116	22.4282	20.2466	0	21.7067	0	19.2494
27.6974	19.1197	20.3943	17.3593	22.2438	26.6943	37.0128	30.9322	24.5077	25.0188	27.1795	24.722	22.9519	25.9005	26.1147	0	23.4266	24.6153	23.8055	29.5539	22.7864	24.4226	22.8306	22.3782	25.2742	21.3446	22.1222	32.1129	24.2246	19.8818	32.4884	19.9367	22.9384	28.4116	21.6685	20.7381	17.9949	24.2462	24.1744	25.9244	27.2286	20.7135	25.1874	21.4167	22.3088	25.9816	0	23.2209	0	20.3597
24.977	0	0	0	25.0146	25.597	36.0517	30.1513	23.748	24.2206	26.5835	0	23.7305	27.0045	25.9923	0	22.7388	24.866	22.4502	26.7637	22.0327	21.4207	25.7608	0	23.4795	22.6938	22.9395	31.4177	23.919	0	31.6083	20.8049	23.5795	27.8029	0	19.8258	18.2407	22.324	24.2803	26.9188	24.9139	0	23.8952	21.6544	22.4258	23.8668	20.5288	21.9837	0	20.7253
27.7228	21.5594	0	0	23.1574	26.1269	38.2237	30.6571	25.2045	25.2539	26.6882	0	23.0457	26.8808	28.3484	0	24.494	25.5869	24.7794	29.5838	23.5849	0	24.9494	23.7183	25.2691	22.0405	0	32.3981	23.1997	23.2134	32.5613	0	27.7273	28.6684	19.9199	21.9818	18.0483	24.8308	23.6767	28.2561	28.294	0	25.7911	21.8906	24.0258	21.2781	0	22.9647	0	20.8572
19.6932	19.8715	20.2621	18.8226	18.7857	23.9868	34.5793	28.5296	23.2549	23.3877	27.2311	0	22.1679	25.9926	27.9199	0	22.7362	24.7941	21.8724	31.1358	21.8908	22.9771	21.9445	0	25.0391	21.417	19.9304	30.2122	22.8573	20.575	30.2344	0	23.5793	26.5102	0	20.757	19.0663	24.0118	23.2256	26.4353	25.4958	0	24.3121	21.5682	22.2159	26.9463	0	22.4548	0	19.3537
25.0217	0	0	0	23.5243	29.9931	34.8336	34.246	27.4705	29.0434	28.2223	0	23.9065	26.6011	25.4086	0	27.191	25.3716	26.9781	27.9065	21.4424	23.2215	22.9352	0	22.5559	20.4438	24.3236	35.2881	26.8974	26.1113	35.8595	20.7922	21.2498	28.1285	0	21.4934	19.6796	19.142	24.3292	24.4487	25.9466	22.5533	23.0338	21.8647	0	26.0522	20.0885	22.0111	0	21.3944
21.8824	20.9136	21.367	20.2232	19.8407	26.5403	35.3559	31.2287	23.5802	25.0545	26.7665	0	22.6921	26.8623	27.5217	0	23.5628	24.0164	24.5115	31.4581	21.7709	24.2001	22.6705	0	25.567	0	22.2071	32.7317	24.6391	21.5709	32.9916	0	25.1964	27.6466	0	20.307	18.222	23.3967	22.4059	26.9355	26.3749	18.3004	25.1306	21.8428	22.4098	26.477	0	22.9924	0	22.2159
28.1694	19.314	0	0	24.6376	27.1355	36.378	31.1244	24.5788	25.1212	26.631	0	22.1949	27.0439	28.0571	0	24.326	26.2333	24.2346	28.9826	23.7557	22.1097	25.8953	0	25.2592	20.7951	20.7754	32.7152	22.2328	21.495	32.8504	0	26.4118	29.1184	0	19.6149	19.2844	23.6736	23.6384	27.993	26.5103	0	26.6664	22.6877	23.9123	23.21	0	21.735	18.6015	19.976
20.4739	20.4583	0	16.6007	0	26.8594	34.2316	31.0869	24.2645	24.8955	25.8445	23.8329	22.9443	26.8948	25.0125	0	24.0873	25.938	23.8536	27.8606	23.2839	19.5599	24.9237	0	22.132	20.6003	22.3367	32.6918	24.9208	21.3484	32.8218	0	21.8417	28.3842	0	20.2451	18.6456	21.7286	23.0222	26.3711	24.4242	20.7727	22.6523	22.4631	21.1416	22.0174	0	22.3097	19.6463	19.3503
27.6639	20.3391	0	0	0	24.0888	35.0028	28.4265	22.6023	22.8573	26.6724	22.8732	22.1545	27.3497	26.3187	0	21.905	25.5973	23.169	29.0258	21.672	21.5193	25.3004	0	24.1353	20.3329	25.2533	30.3301	21.619	0	30.4128	0	26.5529	27.4346	0	20.9538	17.0903	23.059	22.4668	26.9691	25.1841	21.3454	24.7562	21.7181	21.6528	20.0554	0	22.8474	0	20.392
27.8113	19.3804	0	0	24.6728	27.2976	38.4295	31.6694	25.2125	25.4194	26.3948	20.9185	23.2434	26.1866	28.2258	0	25.1423	24.6185	23.3324	28.1521	23.8669	0	25.2063	0	25.2361	21.5333	0	32.5241	24.8247	23.8888	33.5835	0	24.3749	28.9034	0	0	18.4462	24.5609	24.2682	28.2495	27.5935	0	25.2522	23.2235	24.3438	0	20.5997	23.7654	0	19.409
28.2271	0	0	0	0	25.4331	35.6262	30.1334	23.1392	24.5288	25.4302	0	22.1404	27.0364	27.5179	0	23.6258	26.5776	22.7784	31.6007	22.7664	22.2555	21.0645	21.407	25.2185	0	0	31.4215	23.9249	21.6143	31.6758	0	26.177	27.1042	0	19.0337	16.3833	22.7899	22.7198	27.4675	26.4933	0	23.3052	22.1652	22.6402	0	22.7848	21.1571	0	0
27.9409	0	0	0	23.4492	26.456	36.806	30.8693	23.7788	24.9951	26.7694	22.5507	23.7207	27.4803	27.1743	0	23.4599	24.7987	23.242	28.8088	23.313	21.5678	25.0264	20.7706	24.7981	22.0821	0	32.2304	23.0944	0	32.584	19.9403	26.2254	28.2757	0	19.4149	17.3656	23.8265	23.9835	27.7662	25.7418	0	25.456	23.4202	23.0529	21.9249	19.8623	0	0	0
27.0502	0	16.291	0	23.8006	28.094	37.5612	32.7768	25.9537	27.1617	27.347	0	22.7182	27.5035	28.1385	0	25.6964	26.4861	25.6889	27.4575	23.3492	21.186	25.5962	0	24.6937	21.6372	0	34.1712	26.9747	25.0332	34.5495	0	25.2384	29.2771	18.8392	18.3475	0	23.6229	24.302	27.8587	27.4086	0	25.0339	22.7856	24.3903	0	22.9574	21.3138	0	18.3176
20.5639	21.4265	0	0	0	28.5787	32.4324	33.0707	26.2627	27.1571	27.186	0	23.259	28.344	25.2203	0	25.9791	26.0242	25.8345	24.7917	24.136	0	26.6513	0	21.4044	19.2258	20.6885	34.1988	26.7324	21.5771	34.9466	0	0	28.9421	0	0	18.1805	18.7399	23.2707	24.7256	20.3199	19.2819	0	22.6818	20.8334	0	0	20.8986	19.0636	0
24.6708	0	0	0	0	24.8882	37.8109	29.2302	0	23.6229	27.0329	0	22.747	28.0107	26.9178	0	22.1509	22.4992	0	28.0575	20.4317	0	23.8396	0	23.8386	0	0	30.7557	22.331	0	31.3575	20.7928	23.1984	28.4643	0	0	0	23.2636	24.7771	27.6333	27.5421	0	24.5666	22.2454	23.401	23.4404	22.5488	20.9878	0	0
28.2056	19.5485	0	0	23.5207	27.5782	37.7218	31.8005	23.8365	25.9633	26.8328	0	22.0761	27.6891	28.6744	0	24.5625	25.984	24.6997	29.0082	22.4351	22.3906	25.2884	0	25.6102	22.4171	0	33.6272	23.9998	20.8656	33.7033	0	26.014	28.9792	19.8622	19.3612	0	24.6114	24.142	27.4878	28.0677	0	25.779	22.2994	23.8383	21.8824	22.0581	22.7224	19.4581	19.7966
29.1898	19.8091	0	0	22.955	26.8813	37.0412	30.9833	23.863	24.9536	27.571	21.2973	22.2492	28.0572	27.8677	0	24.1484	25.9777	24.1125	31.9806	21.9763	21.4602	25.1718	0	25.7399	21.5373	0	33.0744	25.2077	21.1086	33.0661	21.115	25.6237	28.2315	0	0	17.8196	23.5462	23.3328	27.5398	26.8722	18.3568	26.4659	22.8349	23.2512	20.6388	21.3026	21.852	0	18.6709
0	0	0	22.043	0	25.5849	35.4981	30.7209	23.4915	24.3492	27.8631	0	22.6648	27.3368	27.0556	0	22.5855	25.5764	23.688	28.5499	22.9335	23.0837	20.9926	0	24.4086	0	24.7375	31.7785	23.217	0	32.1194	0	27.7562	28.6812	0	21.0034	17.4298	23.7173	22.8425	25.8397	27.0662	21.046	24.772	21.373	21.2646	0	0	22.903	19.4506	0
21.2337	18.9429	0	17.2522	0	26.5637	29.8954	30.9087	23.5407	24.8125	27.5943	0	21.9387	24.851	26.6856	0	23.6809	24.5591	23.4522	28.5044	22.0666	22.0154	18.4678	21.0936	21.6157	20.3232	0	32.4638	22.6127	0	32.4404	0	0	26.4399	21.1367	19.7359	17.7613	0	20.9602	22.8305	19.0192	0	0	21.1245	0	0	0	21.2585	0	18.4972
22.5477	0	0	0	0	23.9989	35.2779	28.6744	22.8474	22.8087	24.1846	21.6375	23.2146	26.8569	26.7207	0	21.9602	24.0011	26.0657	28.0938	22.0006	20.3665	24.0448	0	22.1914	0	21.962	30.0699	23.045	21.2225	30.5437	0	19.6639	27.9673	0	20.639	17.9464	22.5144	21.6239	25.461	25.856	20.8605	22.8596	22.0077	20.5162	20.6224	23.849	21.4766	0	17.6646
23.4522	21.9446	22.4327	21.5833	0	26.4913	32.7361	30.7724	24.0086	25.3559	31.0383	0	23.6397	22.7384	21.6987	23.5742	23.91	21.1824	23.5959	27.249	0	24.9946	22.1533	24.408	21.5879	24.2048	23.1571	32.5066	22.707	21.5692	32.6063	24.5697	18.4832	27.1652	19.9847	22.6459	18.549	19.9689	22.3179	24.1223	24.7697	21.5094	22.4865	20.3275	19.9924	22.6905	0	23.9124	19.7131	22.1499
23.725	0	20.7274	19.063	22.2673	26.8617	35.769	30.931	23.5909	24.8032	27.8544	0	23.7698	27.8555	27.054	0	23.3289	23.58	24.5724	27.2161	21.3266	20.1571	24.8035	20.6244	22.7311	20.9493	0	32.4529	23.4281	0	32.6006	21.1309	22.2694	29.1974	0	20.2331	19.0649	20.696	23.8696	26.8131	26.2948	19.1737	22.3127	21.269	22.9296	25.3775	0	22.0074	0	19.6367
21.7212	0	22.4442	17.5747	20.1632	24.8139	35.5551	29.5023	23.1422	23.8177	26.8119	0	21.9465	26.6664	25.8294	0	22.9164	23.1439	22.7149	27.9598	21.4971	24.3899	24.596	0	23.4246	21.2498	22.896	30.9872	22.5349	20.3024	31.476	26.7065	20.8249	27.2882	0	20.8054	19.6908	24.2149	22.6262	25.1007	25.4846	20.304	23.6321	21.5851	21.4073	28.3759	0	23.6222	18.6568	20.7938
26.3261	0	22.316	0	24.5115	25.6531	37.6983	30.1572	25.6348	25.4506	26.4581	0	22.1184	27.2818	27.3601	0	25.4083	25.1353	25.3442	30.1654	23.4894	21.7516	24.8732	0	24.3314	21.8328	0	31.9305	22.6063	0	32.2718	0	25.9768	28.5689	0	0	18.7327	24.4673	22.3781	26.9561	27.8517	18.809	25.9494	22.3953	23.6152	25.3357	0	23.2402	18.3162	20.6726
24.3025	0	0	0	0	24.3016	35.9046	28.6199	23.0473	23.0011	25.8927	0	23.116	28.9733	23.9222	0	22.2382	23.4903	23.0806	28.1028	19.6684	23.4449	26.2499	0	23.3606	21.6755	20.5636	30.2448	21.9389	0	30.6284	0	21.8608	29.2626	0	20.3995	18.0768	22.8564	22.4425	0	24.5489	21.1544	23.536	21.1029	0	22.5965	0	22.4839	0	20.3184
25.6442	0	0	0	24.2471	26.8798	37.6944	31.13	24.6019	25.5608	26.0991	0	22.4439	27.0433	27.6852	0	24.5553	25.9194	24.5652	28.6315	23.3865	22.4855	25.1339	0	24.3235	22.0197	0	32.1483	24.2375	0	33.0388	0	26.8948	29.0237	0	0	17.9865	25.3143	23.8263	28.191	27.7985	0	25.7595	23.032	24.1492	22.8167	24.3952	22.4397	19.1998	20.4789
24.4199	23.1321	22.103	20.4872	22.2003	24.5144	34.5456	29.0561	25.9143	22.6065	31.5154	0	23.8472	22.278	22.9846	23.6568	24.0034	23.5976	23.5246	25.5782	0	23.6015	21.4139	22.2553	22.6105	24.5199	25.3249	30.5509	22.7344	0	30.9686	22.4828	0	26.8252	0	22.4594	21.7765	21.4993	23.0653	25.7705	25.0248	22.5698	22.4613	20.9199	0	22.8931	0	23.8477	19.4502	21.8575
21.925	19.632	0	0	0	27.1079	30.0241	30.9242	24.282	25.5207	28.7788	0	24.1964	24.1855	23.9045	21.2664	24.4722	20.4018	24.2816	25.8074	0	25.4898	0	22.0119	22.0318	22.3944	26.3907	32.4146	22.579	0	32.9792	22.4324	0	26.4098	21.9843	21.9196	18.7433	0	21.9874	22.3064	20.4372	21.4216	0	19.6085	0	26.7432	21.1508	23.0723	19.7471	21.1641
21.6676	0	0	0	0	26.1164	31.0309	31.3173	23.7732	24.6119	26.9568	0	23.4708	27.09	26.4675	0	23.379	25.3636	23.0749	25.4245	24.0306	0	24.2921	0	21.7905	0	25.2341	32.4649	25.2088	21.348	32.936	0	19.9747	28.1776	0	18.742	0	20.1016	23.8471	28.3304	19.8285	19.5039	23.181	21.7302	23.1639	22.7075	24.7295	22.949	18.0419	0
25.0811	0	0	0	22.0688	27.978	36.8291	32.387	26.0304	27.1028	27.1208	0	24.0862	26.7687	26.7328	0	25.0143	24.985	24.6719	26.7334	22.4798	22.1628	24.7919	0	23.7981	23.8209	0	33.6943	25.6468	22.7323	33.8072	0	23.8386	28.2531	0	0	17.353	22.727	24.4733	26.1851	24.7267	0	23.5039	22.417	23.205	23.8809	21.786	21.8744	0	21.3032
24.6517	0	0	0	22.2759	26.8084	37.8845	31.5396	25.1545	25.6953	26.5864	0	23.8796	28.2056	27.0086	0	25.0909	25.7876	24.827	28.0142	23.3643	0	25.5715	23.1019	23.6053	21.1221	19.697	33.0797	26.1534	25.2339	33.4483	21.5189	25.22	29.5229	0	18.766	16.9789	23.6984	24.218	26.6758	27.912	0	24.8265	22.863	23.8632	24.163	19.3087	21.9959	0	0
22.6927	0	0	22.5314	0	25.2148	35.4249	29.709	23.8341	23.8617	26.0882	21.8367	23.0053	28.62	24.026	0	23.1705	24.154	22.6966	27.0903	21.3168	22.7702	20.7326	23.1475	22.3466	20.8973	22.3822	31.0956	22.7814	0	31.373	0	0	27.5451	0	21.8923	20.5059	21.1234	21.3145	23.3373	24.7183	21.172	21.312	21.6927	0	22.2275	0	22.4958	19.8668	17.7627
25.2421	0	0	21.6774	23.9007	24.7299	37.4179	28.9365	24.0287	22.4726	26.0988	0	23.175	27.1542	26.7297	0	23.4507	24.4949	23.1319	27.8616	21.9939	0	24.6832	0	23.0791	23.2971	24.5964	30.8588	24.146	22.4548	31.1706	0	25.2907	28.3607	0	22.0809	18.1621	23.4648	23.0001	27.5442	26.2921	20.8386	25.7585	22.4662	23.0614	22.6216	21.4358	21.6094	19.0793	0
21.7921	23.15	22.164	19.2708	0	24.77	32.3676	29.8967	22.4521	23.481	30.2821	0	24.0027	0	22.0876	22.7351	22.1903	19.0821	22.9271	24.9682	0	22.322	22.0431	21.8273	21.8516	23.7527	25.2192	31.1489	23.6935	20.9442	31.5214	19.0949	0	27.5541	0	22.6503	22.8178	0	22.9539	0	23.842	23.1907	0	21.6419	0	26.3176	0	23.3453	18.8286	21.6042
25.0073	20.6634	0	0	22.8822	27.5017	36.566	31.9459	25.0889	26.0175	27.7727	0	24.3445	28.3027	25.9487	0	25.0837	25.4358	24.5146	26.8755	23.0687	19.9239	24.3394	0	23.4679	22.3953	0	33.5197	26.6349	23.4325	33.9462	22.6255	22.2608	29.0351	0	21.0666	0	21.3119	23.7807	27.1018	26.4498	0	24.7281	22.6221	22.9981	20.4811	21.3163	21.2799	19.7146	19.1826
27.7877	0	21.4252	0	0	24.0431	37.432	28.3695	0	22.5452	25.909	22.6462	23.3869	27.7588	25.9629	0	0	23.2091	0	30.1918	22.707	24.1963	0	0	24.627	20.7642	0	29.6879	22.6565	21.168	29.8906	0	21.5939	27.1654	0	18.129	0	23.8565	21.6657	24.9747	26.338	0	23.7609	20.8475	0	24.7348	0	21.9524	0	0
25.1171	19.4348	22.9511	17.1809	22.8624	26.2027	36.383	30.455	23.8542	24.5665	26.3677	0	24.2963	26.6123	26.7367	0	23.5664	23.8343	23.4753	27.2936	20.5411	21.8214	22.0859	20.3543	23.2674	21.6398	0	32.4001	22.9598	22.0051	32.2077	0	25.8402	27.6203	0	19.3339	0	23.5157	22.595	25.4879	26.3633	20.9303	23.3818	21.0364	20.8826	0	0	20.4535	19.5942	20.5464
25.6251	22.4814	22.1249	21.6304	0	25.6438	34.7971	30.8959	24.2401	25.1437	33.2343	0	24.3687	23.6987	23.0743	24.123	23.4982	0	23.8014	27.3022	0	24.9299	20.8039	26.1702	24.0652	24.2611	25.8092	31.7207	22.7112	0	32.0055	23.6167	0	27.7106	18.6898	22.0827	21.7903	21.1529	22.3533	22.5221	24.1346	22.9757	22.0159	19.8877	21.2886	23.2242	0	23.4831	20.4472	22.8311
21.6689	19.5494	21.3835	0	0	25.8518	33.9148	29.7897	23.3346	23.7151	26.2933	0	23.9547	26.054	21.5113	0	23.4882	20.5831	23.3072	30.0313	19.3708	23.9895	0	0	21.857	0	24.7047	31.0753	23.1008	0	31.6826	18.9676	21.5871	27.1918	19.3395	22.9453	18.637	22.5509	21.8609	24.3971	24.2184	21.4728	21.5483	21.2179	0	30.4255	0	23.5394	20.6175	19.933
22.4652	20.3536	0	0	23.0751	27.2116	32.5236	32.2251	26.6317	27.0789	28.5011	21.0493	24.0678	24.7915	25.531	0	26.003	24.6232	25.838	26.7861	21.2226	21.7029	23.7511	20.8343	21.4433	23.1783	24.3499	33.8056	25.0824	21.41	34.465	21.0232	17.9584	26.7332	18.1956	20.3582	20.224	0	25.4738	23.9828	20.9813	0	20.3416	22.2931	0	22.5706	21.1216	21.2367	19.5534	19.6747
26.3331	0	0	0	23.8473	27.6781	37.2856	32.3984	26.537	26.5058	26.7599	0	23.7024	27.654	27.0356	0	25.568	25.9732	24.6421	27.7424	22.8662	20.0015	26.5843	0	23.9346	21.5295	0	33.6012	24.6086	24.7075	34.0495	0	24.9478	28.9798	0	0	19.9735	22.6297	25.1595	26.9057	26.1772	18.0479	25.1042	22.8787	23.8284	0	0	24.7343	0	0
24.1155	0	0	0	22.5429	28.1906	35.7481	32.6228	25.6967	27.1046	28.2002	0	23.6817	27.1466	26.0019	0	25.7608	24.8849	25.4267	27.5616	21.0861	20.4477	24.116	0	22.9091	22.0027	22.4159	33.7026	26.7964	23.0383	34.3257	20.4822	24.5344	28.7431	0	0	17.7417	21.1927	25.0349	26.3533	25.8766	19.2128	25.0078	21.7286	23.6048	23.3015	22.4343	21.2124	19.6744	21.1361
0	19.5	0	21.7763	20.2527	23.4397	33.5447	28.1632	0	22.4943	27.1319	20.7772	24.0152	25.807	24.2248	0	23.1382	22.1556	0	27.2096	0	0	23.1741	0	21.9658	23.7255	27.2664	29.4501	21.8715	20.5167	30.0617	21.6041	23.6247	26.4168	0	21.266	0	22.7552	21.5465	26.3787	22.456	21.3339	23.5555	0	20.5177	0	17.5956	24.5885	19.7652	0
20.5138	22.9492	0	20.9621	20.8622	27.5879	32.8606	32.2424	24.4298	25.8445	31.5916	0	23.4576	26.6268	22.7787	23.0598	23.8477	18.694	24.2679	24.9902	0	22.2945	24.3179	20.253	22.6956	22.6412	25.0986	33.5985	24.805	22.1732	33.9374	0	0	27.0034	0	23.3127	0	21.3679	19.9863	23.8326	22.0542	22.5406	0	19.9491	21.7975	21.0361	20.8956	23.2508	18.1329	21.1412
19.568	0	0	0	18.5371	24.4806	30.444	28.729	23.6754	23.6689	26.9508	0	23.7856	21.5779	25.3771	0	22.1132	22.5573	22.6726	23.6563	0	19.2649	0	0	21.4084	21.0581	19.9069	30.4018	21.4954	19.7622	30.5301	0	0	26.8954	0	20.7606	17.4415	17.8535	21.3691	25.815	20.4117	20.5083	0	17.2215	0	0	0	21.493	18.6696	20.1885
23.9537	0	0	21.9133	24.0922	27.9371	37.0921	32.1956	24.9793	26.7715	27.1245	0	23.5624	27.3926	26.9898	0	25.1151	26.3775	25.0355	25.9107	23.2805	21.6626	25.9948	0	23.5479	21.9684	0	33.5186	24.5417	21.5297	33.9106	0	24.2017	29.1089	0	0	18.3627	22.73	24.1025	27.9318	27.0688	0	23.7893	22.9392	24.6247	0	20.5924	21.6586	0	19.7687
0	0	0	0	19.4063	24.7987	35.2668	29.3736	22.8196	23.9798	27.1894	0	23.4968	26.5939	26.3005	0	22.9021	24.548	22.7661	27.3464	22.9328	0	26.4433	21.9337	22.0181	0	24.125	30.9347	24.0003	0	31.1811	0	23.3396	28.1436	0	20.9246	17.658	22.6122	21.4576	25.8842	25.5194	0	23.969	21.5759	21.5485	22.2643	21.6494	23.704	19.7504	0
0	19.2466	0	0	20.9318	26.1967	32.3798	30.4302	23.4781	24.6737	26.9925	0	23.3666	25.3755	23.4292	0	23.4766	22.5966	23.1215	25.8685	0	21.5307	0	20.279	20.2505	21.7252	0	31.919	24.7328	19.8158	32.2015	0	17.9793	25.3764	0	20.2985	19.4599	21.0855	0	22.9757	23.0919	0	0	19.3491	0	0	0	21.2172	0	0
26.2262	22.2236	23.0885	22.2608	19.3963	24.2417	35.537	28.1681	21.7731	23.0612	32.4796	0	23.9348	22.9656	21.6383	24.5171	22.7305	0	21.3857	28.7622	0	25.4116	22.6919	27.4254	23.6912	24.126	23.9863	29.8703	22.9099	20.284	30.2989	22.6483	19.2249	27.4227	20.078	22.4193	20.9849	23.4977	21.6653	24.7851	25.7739	22.3023	22.834	21.0345	20.8616	25.6288	17.9534	24.4405	19.7046	23.1485
26.5278	0	19.3212	0	23.2088	26.4525	38.4615	30.9622	25.2081	25.7966	27.0397	24.4119	22.8449	27.7029	27.3458	0	23.9358	24.8872	25.1227	28.0799	23.1764	21.2379	25.1912	20.3261	24.4969	21.3887	0	32.4319	25.1193	22.9413	32.4538	0	25.6655	28.6231	0	0	0	23.5973	23.5632	28.3563	28.265	17.592	24.8972	22.9062	24.1716	0	22.1795	20.2229	19.5968	0
0	20.1344	23.4308	0	19.1858	24.8841	34.6014	29.862	23.7608	24.2999	28.8378	21.4637	23.3271	26.0386	24.0359	19.0996	23.5497	0	22.6425	25.781	0	24.0085	0	0	21.3324	22.0993	24.5399	31.2371	22.5667	20.5988	31.4732	0	19.731	26.8419	0	23.0321	17.8299	22.211	23.7215	23.5396	24.4221	21.0829	22.7521	0	0	26.3442	0	24.517	19.6656	21.0284
27.5457	0	0	0	23.446	28.4879	38.2945	32.4782	25.6701	26.4997	26.9299	24.0717	23.5548	27.3334	28.2168	0	25.5323	25.1088	25.3397	27.9094	23.6652	0	25.8583	0	25.2025	0	0	33.9785	27.216	25.4389	34.3816	0	24.487	29.3338	0	0	18.88	24.4677	23.9343	28.7106	27.7548	0	25.419	23.5195	24.7136	21.6279	21.0514	20.2534	0	21.5998
22.8367	21.64	22.8809	19.7303	22.8924	25.2897	31.4417	29.6889	23.0603	24.5601	29.3212	0	24.2488	24.8618	23.8284	0	22.3858	23.0179	22.8026	26.1364	21.663	23.1959	23.2695	22.0563	21.7057	23.5874	25.567	30.7943	20.4118	0	31.7221	24.2242	19.9035	27.7229	0	20.993	20.2588	22.6895	23.6832	24.6986	20.4078	20.2622	22.6633	19.9394	20.9572	23.0054	0	23.4422	19.2157	20.8692
21.3377	0	23.7431	0	22.2041	25.8281	33.1437	30.2364	23.6481	24.8363	26.2955	19.766	23.3758	28.8068	26.1462	0	23.6721	26.2174	23.3037	26.6639	23.7777	0	23.7589	0	22.5843	0	20.0365	31.0605	23.9316	20.2818	31.8856	0	18.7347	28.924	0	18.5671	18.351	0	23.0183	27.1775	21.5109	18.1679	19.1566	23.0594	24.1187	22.7277	21.4174	21.3775	19.1656	0
23.5886	0	0	0	23.1636	28.2685	36.1128	32.487	26.645	27.2189	27.6987	0	24.0898	26.4071	26.6209	0	25.8451	24.6264	25.807	25.917	21.1758	21.0799	24.4753	0	22.5519	22.2295	0	33.7988	26.1717	24.7286	34.6992	0	23.4204	28.1382	0	0	0	22.9847	24.5488	26.0801	23.5609	0	24.283	23.369	22.9185	19.3169	20.9917	20.7754	0	20.1167
25.4211	0	0	22.511	23.6838	26.2867	36.5576	30.474	23.0714	24.8762	26.0141	24.8843	23.1533	28.6056	27.8339	0	23.2364	26.3351	22.9617	27.403	23.8241	23.3466	27.4057	0	23.9222	21.2325	0	32.1283	21.4784	0	32.2589	21.1765	25.2328	28.9853	0	20.5631	19.6254	23.4672	24.1116	25.3622	26.0831	0	24.866	23.1518	21.0927	22.3186	22.4326	22.3079	0	0
21.0248	22.0397	23.0039	22.059	20.1197	22.1631	30.2251	27.1543	23.5943	22.4217	31.0753	0	24.3074	21.878	21.5788	23.1741	19.7579	0	0	24.9144	0	24.4786	0	23.2677	20.1068	23.8712	23.3987	28.0706	20.442	0	28.9647	0	0	25.8607	0	21.8084	19.7506	18.5805	0	22.7285	19.0198	19.5147	20.4837	19.1937	20.9623	24.3422	0	23.9775	20.1624	21.8294
25.0877	21.6978	21.3429	20.1251	21.4241	25.2631	35.2441	30.0101	23.2284	24.1809	30.9929	0	24.6202	25.2512	24.6756	22.6384	22.6121	21.8893	22.5342	27.5368	20.7092	22.2116	21.9879	18.8723	22.0788	23.6244	23.9073	31.5055	21.6213	0	31.4654	26.2626	22.8597	27.5086	18.6891	20.7428	19.6657	22.3776	22.8869	24.6314	24.5952	21.4165	24.8157	20.7563	21.9013	23.0319	20.5644	22.2455	18.705	21.6373
22.8385	0	0	0	22.5152	27.6424	38.0331	31.821	25.2249	26.0248	26.703	0	23.2106	27.922	25.3765	0	25.4515	25.6032	25.2634	26.9587	23.286	21.9757	24.1297	0	23.2115	0	0	33.4859	24.9939	22.2063	33.8039	0	24.5584	29.397	0	0	0	23.0648	23.7477	27.044	27.9978	0	23.3946	22.0566	23.3819	23.7184	0	21.9199	0	21.6947
21.6331	0	0	0	20.1997	29.6435	36.7151	33.9501	27.4438	28.2023	27.3486	22.4367	23.7769	27.1611	26.2451	0	26.7275	25.728	26.8726	25.5089	23.1969	18.5802	26.4721	0	22.9388	0	0	34.8006	26.9724	24.1619	35.5197	0	26.2656	28.9299	0	0	19.021	22.8497	23.2393	24.4217	25.4376	0	22.9919	21.2322	20.7852	0	0	22.0067	0	0
0	19.7019	0	0	24.1262	25.9562	36.8652	30.3941	24.1767	24.267	26.3906	0	23.7649	26.837	24.7154	0	23.7034	25.9312	24.572	28.1404	20.5055	20.7003	0	0	24.5167	0	24.9068	31.738	24.8412	20.9131	32.5751	0	26.8314	28.2893	20.022	20.5596	0	24.9488	21.1061	25.5498	26.3687	20.2441	25.4235	20.5663	20.9452	0	0	22.7108	19.8351	0
26.0723	0	0	0	23.259	26.2133	39.5588	30.855	24.0864	24.4804	26.1163	0	23.2738	28.0581	28.3015	0	24.5338	23.7152	24.409	29.1306	0	0	25.2767	0	25.6154	0	0	32.5961	23.6391	0	32.6194	20.0465	30.4614	29.1798	0	0	0	24.2762	23.7693	27.5094	29.0414	0	27.3451	21.0618	23.3982	25.0629	22.4038	26.1475	0	20.9428
21.0663	19.8546	19.9995	0	0	24.8609	31.2644	30.0611	22.9461	23.5657	25.9858	0	22.4796	25.8767	24.5829	0	22.821	23.3743	22.766	24.8144	21.4563	23.7128	20.8141	24.0185	21.0808	19.9031	24.0109	31.3677	23.2704	19.4815	31.578	0	0	27.4504	0	22.9318	19.1946	0	21.3703	22.522	21.6046	21.3849	19.029	21.927	21.7898	26.7964	0	22.3445	19.4438	18.4798
23.4723	0	0	0	23.4385	25.2568	33.5138	29.2337	22.7987	23.0695	29.8703	0	23.5416	25.7055	25.7878	0	22.3104	22.9987	23.0212	27.4365	20.0876	23.1291	22.2921	20.2419	22.0233	23.6334	22.8328	30.8086	21.5491	0	30.9811	24.8433	19.1942	26.7623	0	20.3679	18.164	21.7283	22.4827	24.9937	22.2607	0	22.7037	21.4875	22.5464	21.4693	23.0765	21.0736	19.4019	18.6344
21.8081	0	0	23.2944	23.4083	26.8733	27.2735	31.7801	24.3481	25.4547	28.2103	29.1397	24.4244	0	24.6122	22.6556	24.2779	23.7404	23.547	23.9795	0	21.2394	24.394	21.1675	21.1731	23.0037	22.1335	32.3671	26.0242	23.1504	33.2424	22.4961	0	27.1721	0	21.6308	19.7022	0	22.5848	0	22.9139	20.9503	0	23.2368	0	22.3896	19.9006	22.0028	19.0413	21.8972
27.8106	0	0	0	22.3576	26.5134	38.1604	31.6723	24.0962	24.9188	26.2064	0	23.9244	26.8752	26.5259	0	24.3119	25.543	23.9793	27.2646	22.7566	21.137	26.1991	0	25.3515	21.9027	0	33.0314	25.4429	21.6529	33.0462	0	25.7145	28.7097	19.7879	0	19.5808	23.403	24.1254	27.733	26.4648	0	25.5818	22.4378	23.9525	0	19.5916	22.7745	0	19.7627
22.4684	19.8003	20.453	0	0	24.3026	34.3095	28.9993	22.5251	23.1956	25.3279	0	23.2183	27.0909	25.2447	0	22.1499	23.6091	20.9727	27.324	22.0592	23.221	20.8973	0	22.5798	20.6237	24.9511	30.8401	22.444	20.1016	30.5805	0	26.7426	27.8576	0	22.0339	17.6747	23.4942	21.6221	24.1669	23.8428	21.5269	24.0477	20.6034	0	26.6185	0	22.6569	19.8553	18.622
25.782	20.9908	21.1166	19.6267	0	25.0706	31.9291	28.9222	21.9641	23.4507	27.6946	0	23.6547	25.6944	23.801	23.9597	21.8439	25.7228	22.09	25.0197	21.9599	23.4159	24.6767	22.9794	22.311	23.8491	25.2539	30.5205	23.0621	0	31.1995	20.5638	21.7218	27.2381	0	21.5253	18.1585	20.7812	22.8467	27.3238	24.0245	22.2446	24.4667	21.3122	22.6599	22.0868	24.0949	23.7157	19.9365	21.0563
25.2213	0	0	0	23.2822	27.5327	36.5485	31.9722	24.7656	25.7171	26.7661	0	23.5287	26.6882	27.072	0	24.7342	24.9162	24.7819	29.4089	22.5947	22.3306	24.7068	19.5475	24.1698	22.2454	22.3686	33.4792	25.6546	21.6201	33.8729	20.6122	21.9344	28.4139	0	20.2629	18.831	22.7737	23.18	28.1582	25.5429	20.2795	24.953	22.4552	22.504	23.7247	20.9567	21.8582	19.2222	0
22.3924	0	21.8063	0	0	25.4174	36.3499	29.8996	23.4165	24.4176	28.0079	0	23.2257	29.0445	25.1619	0	22.7223	20.7207	23.4054	27.4104	0	0	21.8269	0	23.6784	0	0	31.4884	22.7118	22.4151	31.7598	0	0	28.0314	0	0	17.8283	21.138	22.757	29.403	25.8444	0	24.7804	21.5027	24.882	19.45	24.9276	21.6597	0	0
26.3529	0	19.1382	0	23.9419	27.2499	36.9586	31.3851	25.3546	26.1314	27.8952	0	23.724	27.4721	26.7348	0	25.0794	25.4488	25.2594	27.5397	23.4617	22.2726	25.8222	0	23.8511	22.256	0	33.2657	26.1089	22.8924	33.2152	18.9029	25.2156	27.9776	19.5792	20.5927	0	22.002	25.3	27.5079	24.5112	0	24.2969	23.3534	23.3597	0	21.5575	20.5519	19.8987	0
24.2344	20.4798	0	16.1863	0	25.5069	36.9342	30.1365	23.5863	25.337	26.673	0	22.4326	26.9736	24.813	0	23.6055	23.7217	23.3976	27.289	22.4414	22.0225	20.9285	23.8022	23.3023	21.1002	23.9868	32.0369	23.8553	20.8589	32.0659	0	20.3871	27.4879	0	22.2252	19.0956	22.6317	22.3712	23.7619	26.7905	21.2807	22.7628	22.1568	0	23.419	0	21.9306	22.4829	19.3404
22.4516	22.3937	23.4092	22.204	20.19	25.6527	31.9549	29.9284	23.1478	23.8097	31.1254	0	23.838	24.3497	22.5458	23.1182	22.7638	20.6779	22.4561	26.5342	22.2199	24.0315	23.9116	21.2247	21.4329	23.8591	22.867	31.2507	21.5946	0	31.561	19.7775	24.6541	27.2066	19.7712	21.6282	19.6646	19.3223	21.9398	25.6255	23.9156	21.2228	24.2491	21.3287	22.4385	24.5516	18.103	23.8372	19.5549	23.5697
26.7946	19.6103	21.7349	19.0401	22.9337	26.4866	36.9383	31.331	25.0067	25.5783	28.3872	0	23.8699	26.3822	26.276	0	24.0695	25.5856	23.5338	29.4363	22.4067	22.4713	24.7723	20.6272	24.4797	22.7631	25.105	32.1308	24.0217	21.8665	32.9433	0	28.7532	28.7496	20.506	21.5521	17.6789	21.9261	23.2585	26.258	26.3721	19.6609	24.5788	21.9016	23.6056	23.449	19.7881	22.8554	0	21.3902
22.0065	23.0096	0	21.7531	0	25.2735	32.4158	29.6338	23.5599	24.2382	26.2145	0	22.9412	26.6476	22.6809	0	23.3781	21.6689	22.0759	26.6851	21.2815	0	0	0	21.7247	21.2564	0	31.3584	23.6863	21.0805	31.5908	0	18.9073	27.1798	0	20.6194	17.6063	21.2397	22.4846	24.2528	20.8512	0	0	21.0051	22.0693	0	0	21.7767	0	0
24.8876	19.2283	0	0	24.9237	27.5431	36.7303	31.9621	24.6536	26.0781	27.3889	0	23.7167	27.51	27.1357	20.9907	24.4839	25.5702	24.4013	28.1543	23.1521	23.257	25.9469	0	23.0914	21.5672	0	33.3404	23.7727	0	33.8265	0	24.3836	29.4043	0	20.6854	18.0245	23.0885	24.5195	27.5767	26.2641	0	24.1296	22.3219	23.8309	19.4634	0	20.7513	0	20.6726
25.5083	0	20.1138	0	23.0689	29.1889	37.4584	33.6541	27.0988	28.186	27.693	0	23.8858	27.7678	27.9513	0	26.7334	24.4549	26.711	29.1378	23.145	0	26.0002	0	24.4549	19.1868	0	34.943	26.4345	22.5487	35.5018	0	23.7816	28.5256	0	0	0	22.7825	23.5102	25.6728	26.9371	19.6728	24.3627	22.9544	23.1613	0	26.0405	22.8919	0	21.2846
25.6939	19.0165	0	0	23.0611	27.7514	33.3613	32.4961	25.641	26.6449	27.8561	0	23.8076	27.9387	27.0197	0	25.6295	24.7636	25.7894	29.7867	22.1728	22.0179	24.4198	0	24.6718	22.6989	0	34.0355	24.9766	21.4141	34.4775	22.4233	23.2026	27.8837	0	18.0792	0	20.9185	25.3282	26.9864	24.5486	0	24.5211	21.6204	22.2343	21.0131	19.7575	20.1146	19.6944	0
25.047	19.42	0	19.8348	0	27.2931	39.3508	31.7634	24.6614	25.1751	28.8337	23.9458	22.7592	25.9614	26.7803	0	24.1066	23.4329	23.3967	32.0927	0	24.0447	22.9784	22.0705	25.6893	20.2788	0	33.0963	25.0264	0	33.0224	0	24.0857	26.7501	21.1239	21.465	18.9336	25.793	23.0029	27.5291	28.1039	0	26.851	21.2252	23.2022	26.7549	0	21.017	0	0
21.5944	22.5781	24.0623	21.1145	21.2918	25.3393	29.0588	30.2563	23.0109	23.8179	29.5061	20.7486	23.5649	25.0386	22.0483	23.4532	23.6021	19.8707	23.0399	26.7763	0	24.3585	0	0	21.4845	23.6452	24.2616	31.5044	23.7783	19.6357	31.929	19.6526	0	26.1539	0	22.4315	19.3116	0	0	23.5409	0	21.5008	0	21.6198	20.2224	26.4935	0	24.9199	20.1857	23.2621
22.6826	22.7331	22.5307	22.5703	19.8171	23.2299	30.6798	27.7682	21.7209	22.1646	32.4207	0	23.725	0	21.1148	24.2598	22.32	18.3945	20.4962	26.8575	0	23.8113	22.5944	22.3628	20.6728	24.2631	24.6116	29.3621	22.2464	0	29.5395	22.6979	0	27.7816	0	22.9884	20.5654	19.4917	20.9487	22.955	20.8726	22.5735	25.1095	18.8689	0	25.7606	0	23.9061	20.2314	22.6583
28.4054	0	0	0	24.0116	28.4353	37.6242	32.5665	25.8805	26.8145	27.3416	0	23.9558	28.0062	27.9282	0	25.8599	25.8543	25.1429	28.6374	23.937	21.6826	25.4051	0	25.1364	22.2501	0	34.1541	25.4249	22.0285	34.5445	0	25.6523	29.2209	0	0	16.7589	24.1899	23.9339	26.9496	26.9787	0	26.2563	23.3827	23.0712	21.8059	0	21.3007	0	20.8503
20.8	22.0172	23.3921	22.4087	20.17	27.7327	30.1177	31.9186	24.889	26.6968	30.4921	0	24.0409	0	22.4752	23.42	24.6504	19.4954	24.6055	25.2732	0	25.4205	0	21.5875	21.4259	24.6584	23.7305	32.9764	23.5502	22.0389	33.4008	17.0633	19.8991	26.7822	0	22.3841	20.0554	17.9311	22.5582	0	0	23.8698	0	19.6255	20.7794	21.5344	0	24.3988	0	22.1416
26.1279	19.743	0	0	21.8426	26.6767	36.3215	30.741	22.9067	24.1666	26.7452	0	23.2801	26.6791	26.2801	0	23.2097	24.939	23.5013	27.6878	22.2757	22.2611	22.8852	0	23.7182	21.5261	25.3403	31.9644	25.1787	23.0754	32.4648	0	23.7127	28.6562	0	21.6791	17.9283	24.6863	22.0606	27.121	25.9631	21.8595	26.2534	21.3289	21.9862	20.7357	21.0869	23.3195	0	0
0	19.7604	0	0	0	27.1164	30.9344	30.8602	24.1046	25.0823	26.9024	25.1003	23.2508	26.1222	24.7174	0	23.7943	24.3205	23.7601	25.7421	21.9615	18.7373	23.4199	0	22.0563	0	24.8382	32.647	22.9165	0	32.6298	0	24.163	28.7642	0	21.1055	17.4727	18.4229	21.3364	24.3101	20.4573	19.1249	21.0971	20.5979	22.2278	22.0092	18.4447	21.5248	20.158	0
23.5351	20.079	0	0	22.726	26.7811	36.8027	31.2823	23.4472	25.0572	26.5582	0	22.6766	28.5092	26.221	0	23.4048	25.0032	23.676	27.7465	23.0384	21.9092	25.9291	0	22.8698	0	19.8164	32.6039	22.8558	21.14	32.9469	0	24.7577	29.3354	19.9826	19.0079	18.6387	22.2282	22.7349	27.1914	25.8877	18.0602	24.7312	22.7098	23.8327	24.9379	0	22.5076	0	21.05
0	22.5045	22.0367	21.2996	21.5737	24.9066	29.282	29.4445	22.7593	23.7835	30.3091	0	23.6649	23.1341	22.4216	24.3537	22.1206	20.3336	23.663	25.2684	0	23.5229	0	19.9129	20.4911	24.0799	25.5178	31.3684	21.565	0	31.3714	19.7598	0	25.7862	0	21.8069	20.2772	0	22.0151	24.3459	0	21.7615	19.9115	21.2296	21.6031	24.8665	0	23.5583	19.8082	21.2196
26.3793	0	0	0	24.0296	27.5835	37.3274	32.2015	25.2355	26.1216	27.4637	24.5365	22.6962	25.744	27.4823	0	24.6393	25.1276	25.0049	28.1315	23.2504	24.2959	24.8784	0	23.5505	21.8211	0	33.8162	25.0921	20.7557	33.8931	0	24.7253	27.9283	0	0	0	24.4828	23.532	27.188	27.7154	0	25.8486	22.7569	23.0465	21.8495	21.6478	0	0	0
26.5055	21.3568	0	0	23.941	26.0874	37.2416	31.0053	24.4588	25.8843	26.9166	0	23.1406	27.6168	27.4191	0	24.4767	24.6451	25.389	28.1207	23.2928	23.607	23.893	20.0755	24.6588	21.1098	24.6695	32.6325	25.0387	23.5673	32.8318	0	24.1034	28.4695	0	23.312	21.6475	23.1545	23.735	28.2329	26.0321	20.5087	24.149	23.5374	23.7981	22.9852	20.2603	21.5228	0	0
21.7469	22.6487	22.2696	22.7111	0	25.9059	27.8781	30.6028	23.178	24.2458	29.251	0	21.7341	22.7196	22.0175	23.3462	23.2561	0	22.8711	25.8436	0	25.8549	23.5856	25.1911	21.5546	22.8675	24.3554	32.094	23.4932	19.2684	32.329	23.3414	0	26.7847	20.4068	22.2333	20.7839	20.2581	20.4722	0	0	23.3257	19.6568	18.2933	22.8047	23.1398	25.4855	24.0381	18.9006	21.9107
24.4129	22.8137	23.4183	21.2332	19.8831	24.7059	29.6415	30.0128	22.9858	24.0494	32.9872	0	23.6295	0	20.8745	23.7006	22.7695	0	22.0262	25.8411	0	25.4659	0	23.7098	22.1592	24.7525	24.5889	31.3225	23.085	0	31.5981	21.248	0	26.4041	19.6725	21.7315	21.2031	20.5172	0	23.4414	0	21.553	21.747	20.4668	20.8396	24.7406	23.6893	24.6968	20.1055	22.4016
22.1232	0	0	0	22.7594	28.4345	36.0536	33.4246	26.1382	27.5561	28.4268	0	23.1171	26.535	27.3211	22.2393	25.8767	24.1326	25.7052	31.0811	20.7856	24.1927	25.131	0	24.8611	21.8497	0	34.9961	27.9464	23.4506	35.2411	21.6301	22.7618	26.9089	19.729	0	0	23.2158	24.4171	24.9137	24.5676	18.6114	24.2418	21.5725	21.4386	21.237	19.2214	23.3507	0	0
22.304	22.2218	21.9102	21.8033	23.3908	26.6646	32.2922	31.21	24.6887	25.2026	27.9516	0	22.7163	24.8945	23.8893	22.4169	24.4265	21.7182	24.6192	26.1512	0	25.2174	22.3942	23.5339	21.8095	23.084	23.8522	32.5644	23.1363	22.1138	32.9628	24.4887	18.3779	26.6553	0	21.2291	19.5094	20.0913	22.4502	24.2565	21.0077	21.4564	21.3536	20.2985	20.5994	22.8954	21.1654	23.5114	18.739	21.9803
24.0074	0	21.1104	0	0	25.626	31.4743	31.1663	24.3305	25.1477	29.3395	0	22.8365	24.2005	24.7524	21.7495	24.4473	0	24.1903	27.6326	0	22.2983	22.8777	21.1019	22.1737	22.8549	24.203	32.408	24.3251	20.7602	32.9761	23.8863	0	27.3809	0	21.8133	19.7555	20.0337	0	24.4316	21.359	21.6717	21.513	20.7098	0	23.275	0	22.7131	20.0424	19.8737
21.4762	19.3218	0	18.3134	0	25.7648	34.8783	30.1475	23.4509	24.2513	25.9884	19.8021	23.4938	28.6097	23.648	0	23.0027	24.6386	22.6727	24.8063	22.0506	20.2968	24.191	0	22.4276	20.8257	0	31.5214	22.591	0	31.9063	0	16.9993	27.0517	0	18.726	17.2802	20.6229	22.2622	23.6438	24.0765	18.6615	0	19.6552	18.5546	0	23.1077	20.7564	19.3002	0
25.5549	19.4072	0	16.6791	22.7694	25.7115	36.2594	30.5269	23.4363	25.2496	26.2913	23.0001	22.5178	27.22	27.2197	0	24.1903	23.6322	24.2486	28.4249	21.5897	0	25.5637	0	24.731	21.6089	23.2306	32.1028	22.6517	0	32.4364	0	24.8619	28.4194	0	21.5152	20.3048	21.9913	21.2187	27.642	26.2041	20.6134	25.0115	21.7823	23.3947	22.6903	21.4434	23.3223	0	20.6215
20.8156	0	0	0	0	25.7096	33.3067	30.4075	23.322	24.7333	28.9842	0	20.7626	21.0127	20.4827	0	22.3728	0	22.2539	26.4385	0	21.7265	0	22.3241	22.6206	0	0	31.7356	23.5849	0	31.9626	0	18.0671	23.2331	21.1788	20.8944	0	20.5135	0	0	22.0585	0	0	0	0	0	0	0	0	0
0	20.5735	0	0	0	23.9564	37.2577	27.9271	22.7462	23.3092	27.3172	0	23.9281	26.494	28.9775	0	22.5188	23.9993	22.424	28.798	22.7573	0	24.2364	20.0412	24.1882	0	25.1868	29.7139	21.511	0	30.2598	0	27.2163	27.2752	21.9112	0	0	24.2418	22.342	26.6276	25.8111	19.8616	24.8227	21.8446	21.4904	0	0	22.4195	0	0
23.1863	0	0	17.2444	21.9008	26.6692	35.3979	31.5098	23.8563	25.0374	26.7688	0	22.0844	25.3426	27.1106	0	23.9505	24.9102	23.8637	27.6312	23.4979	0	26.9694	24.1271	23.9654	0	19.7491	33.4482	25.7492	21.0989	33.1546	0	21.3459	28.7126	0	19.2961	0	21.442	23.7959	24.6387	24.1511	18.0343	24.0019	22.0285	0	22.1411	0	20.9052	0	0
23.7303	22.2461	21.8839	22.7862	20.9907	23.3428	29.9398	28.0011	23.4115	21.8943	33.4795	0	24.6648	22.2808	22.4275	23.3523	23.2679	0	24.3594	25.0388	0	24.325	0	22.0867	20.9811	23.7554	26.3598	28.6972	22.3992	0	29.8092	22.7675	0	27.2935	18.9356	22.5992	21.5954	19.9884	21.8772	23.415	0	21.4901	21.9599	22.2656	21.2166	25.8652	0	23.9185	20.2487	22.6595
22.7685	0	0	0	20.6269	28.1384	34.8344	33.4043	26.1853	27.2408	27.498	0	23.4879	28.6979	26.211	0	25.6387	25.8653	25.3998	25.4546	22.8107	0	26.1747	0	22.7699	22.3936	0	34.3378	25.9238	21.8802	35.0869	0	23.5672	28.688	0	0	18.8517	21.3322	23.3855	25.7762	24.245	0	22.4601	22.0834	22.284	23.0094	0	23.4705	0	0
24.3949	0	0	17.1607	22.8711	26.9299	36.5452	31.8065	25.1217	26.2841	27.7805	0	22.4995	26.5935	26.5794	0	24.9583	23.6998	24.9986	28.241	22.2753	23.594	24.7743	24.0693	23.252	21.178	0	33.0516	24.9437	23.6124	33.7114	20.8491	26.5807	28.538	20.4541	18.9734	18.5358	23.1655	21.9773	27.2763	26.6237	0	24.0325	21.8532	23.2827	20.9991	0	22.992	0	0
24.3139	20.7525	20.8473	20.2185	21.0579	26.3443	33.2736	30.4914	24.7986	24.5691	29.6664	22.4905	24.2422	24.7768	25.7932	21.2199	25.2966	22.6859	24.2103	28.2824	19.7268	24.1065	21.3972	21.0277	21.6975	23.8626	22.3584	32.2792	23.0164	20.2991	32.3038	26.6339	21.6472	25.61	0	19.7764	18.2319	24.4281	23.3352	25.3147	22.7901	19.8168	22.4671	20.7349	21.1148	20.2111	0	22.8472	18.6653	21.3062
22.5843	22.1384	22.7142	21.9267	0	22.7212	27.3625	27.2727	0	21.8788	31.7071	20.9268	24.0349	0	20.2229	23.5767	24.3327	18.9877	0	24.4232	0	23.8786	25.3643	22.9305	20.0491	24.7424	24.5299	29.1815	24.8475	0	29.4539	20.7296	0	26.8804	0	22.773	21.0382	20.2817	0	0	20.0916	21.3404	0	18.8232	0	26.3265	24.96	23.5325	19.0915	22.0226
22.5823	0	0	22.2631	0	25.2891	36.183	29.3161	21.1069	23.2737	28.9233	0	22.4306	27.4196	25.1882	0	21.6017	25.1944	24.8007	26.8323	21.7951	0	23.4025	20.497	22.6231	22.242	0	30.2481	24.0856	20.42	31.266	20.6696	23.4064	27.6407	0	0	19.484	22.3864	22.5514	26.0117	25.2824	0	22.7117	21.4296	22.4325	22.3514	0	22.1485	19.2616	0
28.4362	0	0	0	22.7386	26.791	36.2001	30.7411	23.9096	25.0525	27.0496	0	22.8639	28.1765	27.38	0	23.9712	25.6598	24.4059	29.4778	23.5058	23.8342	25.2847	0	25.4334	0	24.2267	31.8302	22.8966	0	32.3321	0	25.6206	28.5994	19.8888	20.6017	17.2059	23.8339	23.3143	26.5028	26.1007	19.9222	25.8133	21.5362	22.9491	24.2797	0	21.464	18.3661	0
22.3515	0	19.4705	0	19.6132	26.0239	34.1449	30.7982	23.7501	24.3113	27.338	0	22.63	27.2631	24.325	0	23.7985	23.0396	23.3665	26.0484	22.2901	20.3204	22.8852	0	22.2974	20.9849	21.9698	32.0006	23.9993	21.4119	32.373	0	22.1489	27.3912	18.9916	21.4854	18.7144	20.3501	22.5574	23.3338	23.3902	20.7119	21.3182	21.8427	21.4221	26.0153	19.3947	22.275	0	20.1878
23.6884	0	19.8863	0	23.3584	28.3336	36.2618	31.8918	26.0542	26.1607	28.4396	28.0812	22.7324	26.0279	26.696	0	24.3781	24.9742	24.9211	28.3493	23.4548	21.735	25.7876	0	23.6219	21.9224	0	33.0705	25.7078	23.6663	33.4759	0	25.3673	28.2281	0	23.1948	18.7742	23.4852	22.4707	24.5793	26.8257	0	25.7423	21.4201	21.8928	22.7974	0	0	0	0
25.4055	20.4222	0	0	24.1683	28.027	37.037	32.4055	25.6595	26.443	26.6818	22.5281	23.0148	27.0177	27.1135	0	25.6687	25.8951	25.5136	27.0214	23.0908	21.3796	25.4422	0	23.6553	22.2742	0	33.4805	26.1517	24.5825	34.1348	0	23.9615	28.2331	0	0	18.07	23.123	25.496	27.487	25.9994	0	24.0305	22.7853	23.8319	0	0	20.7817	0	20.009
26.2188	18.3177	0	0	23.7839	27.99	37.2025	32.136	25.483	25.9251	26.536	0	23.9189	27.0783	27.2121	0	25.2431	25.4127	25.1628	28.2792	23.0966	0	25.2319	0	24.6013	21.9228	0	33.7998	26.8946	22.4742	34.2274	20.5608	26.7837	28.8623	0	0	17.0568	23.4197	23.6778	27.4778	25.8833	0	23.9747	22.0208	23.1154	19.3388	20.2298	21.2924	0	0
23.3498	0	0	0	22.9055	29.3418	37.7901	33.6401	26.9399	28.2654	27.6222	0	23.3697	28.0521	27.2537	0	26.5757	25.9067	26.5911	27.8859	23.3111	0	25.2533	0	23.4214	0	0	35.0011	26.1639	22.4484	35.6593	0	21.5756	29.2906	0	0	0	22.8666	22.9532	27.1913	27.3754	0	23.668	23.0197	22.6179	22.9714	19.7173	21.1956	0	20.0483
28.5609	20.6019	0	0	22.4755	27.0152	36.3462	31.9047	25.3786	25.672	27.7474	0	23.5039	27.9576	28.2792	21.7631	25.2133	24.6186	24.9151	30.0168	22.5782	22.6064	25.3487	0	25.9538	22.8711	0	33.2038	24.6893	24.6011	33.3147	0	24.0211	27.9739	0	0	18.4746	23.5044	23.5203	25.9889	27.2691	0	25.8127	22.8959	20.4404	0	22.4728	22.2198	0	20.0747
22.0744	22.4984	20.7251	22.116	19.9166	25.2782	33.7456	29.9025	22.8877	23.9878	27.7438	0	23.3803	26.6676	24.7997	22.3575	22.8678	25.6978	22.7842	25.8894	22.9474	22.3175	25.0715	24.8934	22.492	22.0046	22.1572	31.1332	22.5244	19.8703	31.4452	22.514	20.1068	28.4494	20.694	20.5311	17.3595	20.0831	24.2142	24.2565	22.8366	21.3096	21.8463	22.7191	20.6017	25.401	0	22.3749	19.5466	20.2704
0	0	21.5652	0	18.3802	24.2732	26.9904	28.7555	22.183	23.0134	26.0438	0	22.8193	27.5057	19.6431	0	21.8643	20.4904	21.6603	25.5742	19.246	22.3226	0	0	21.1364	0	0	29.92	22.7935	21.1014	30.4502	16.7108	18.2946	27.7072	0	20.7264	17.5786	0	21.0448	23.7588	0	0	0	19.1767	19.2925	0	0	20.9855	20.8344	0
26.0064	0	0	21.3338	24.5282	27.7286	38.5922	32.1704	25.8247	26.1535	28.083	0	23.2259	27.5265	27.6693	0	24.434	25.6044	24.979	27.6978	24.4632	0	25.2676	0	24.1033	22.1347	0	33.1575	23.4282	0	33.9538	0	25.2586	28.9734	0	0	17.6825	23.8424	23.4628	27.3372	28.5011	0	25.0261	23.6077	23.1588	24.0103	0	19.9963	0	20.1812
21.5284	19.7807	0	20.1252	21.9	27.4907	31.7625	32.1517	25.2243	25.7528	29.2894	0	21.905	26.7941	24.2269	0	24.7843	19.7172	24.9272	25.6244	0	23.4524	23.8365	0	22.2854	22.3762	17.7672	33.0561	26.9046	25.0526	33.7486	0	0	27.3026	0	0	16.9442	20.9011	0	22.4311	21.7466	20.5921	21.5416	20.4984	0	0	0	23.16	0	0
22.2569	19.5424	0	0	21.0051	24.9591	33.7184	29.3058	23.1767	22.8745	27.5274	24.023	23.4857	28.6191	26.337	0	22.3049	23.1772	21.767	26.261	21.263	0	22.7897	0	22.5663	21.3407	0	30.9285	22.8591	0	30.9995	19.6256	22.7292	27.9152	0	0	16.5891	23.2405	22.8279	26.2987	24.3558	19.5541	22.0906	21.5948	22.2794	20.2108	19.2731	21.4473	19.726	18.7905
26.0474	22.463	21.3466	20.4482	20.4874	24.6898	36.5239	30.0642	23.748	24.6241	28.8491	0	24.1139	24.0062	25.0824	0	23.3842	22.1625	22.749	27.5332	21.7507	26.0142	21.9823	21.3281	23.7966	22.8115	26.0247	31.7717	23.7923	20.6455	31.7163	21.1841	17.042	27.9453	0	22.0199	22.08	23.1666	22.7894	23.2391	24.6693	22.0084	22.2127	21.1441	0	27.6275	0	22.7782	19.825	22.1164
21.8726	22.4949	21.9416	20.6283	20.5015	25.2783	30.7673	29.2337	23.0216	24.0209	29.3506	23.1991	24.3731	22.2802	22.6516	23.8264	23.2247	0	22.6943	25.4615	0	24.5748	0	21.7823	21.4195	24.5972	23.9753	31.2032	22.2032	18.8978	31.4613	21.5129	0	27.4821	0	22.394	21.1872	0	21.0564	25.5099	21.6515	22.7457	0	20.6923	24.0543	25.9804	0	23.3729	20.1786	21.9951
26.0289	0	0	0	23.6939	29.2337	36.0396	33.3924	26.3734	27.8092	28.9609	0	23.4648	26.2526	26.9552	0	26.1321	25.9527	26.1936	30.0924	22.4901	21.9667	24.82	0	23.7212	22.344	0	34.9235	27.3784	24.1886	35.3499	0	24.4541	28.8735	0	19.7561	16.4317	21.2368	25.0577	26.1364	25.9617	19.7971	24.9847	22.5054	22.1942	24.4126	21.6408	21.5164	0	20.0212
27.6738	0	0	16.7801	23.5328	25.9525	36.9499	30.9942	24.2798	25.0589	26.8029	21.5042	21.6436	27.9829	28.5086	0	24.244	25.8074	23.886	29.9041	23.0309	22.3608	25.5089	0	25.5953	22.3103	0	32.1292	23.8916	23.3501	32.7313	21.9184	25.8702	28.6606	0	19.2853	18.3341	24.004	22.8316	26.6273	27.1991	17.1035	26.0657	22.7553	23.608	23.3891	20.5206	22.0033	0	20.6474
21.1812	20.2176	0	0	21.217	27.5065	33.5929	31.7651	24.8414	26.1755	27.5437	0	23.1432	23.0526	24.1058	20.8719	24.5804	20.4629	24.2648	26.4685	21.536	23.6158	0	22.3592	21.6297	22.2561	25.6914	33.2384	26.7159	26.5505	33.5825	21.8743	0	26.7214	0	22.7209	16.915	19.1564	22.3926	23.4223	23.4276	21.6826	0	21.1859	0	26.1661	0	22.9366	0	18.3395
23.954	21.2921	24.7957	20.9289	0	26.3891	33.9012	31.5939	24.4103	25.4298	30.5245	0	24.8325	24.0748	22.1108	24.9391	23.936	20.7985	23.7513	27.2812	0	24.5473	21.4631	0	21.7549	23.7863	24.7622	32.1337	22.9614	18.4497	32.9079	24.3861	0	26.3981	0	21.6221	21.8182	19.2253	21.5336	23.5716	21.2515	20.0618	20.8411	22.0279	21.517	25.3293	18.6907	25.5942	0	23.0538
23.1181	0	0	0	20.5809	27.0284	35.6677	30.9949	25.3874	24.6623	29.3227	0	23.1528	26.2863	27.4898	0	25.1418	23.2038	25.0622	28.3075	22.1258	20.2749	23.6813	22.9446	23.4065	22.7666	24.0691	32.5229	23.8862	0	32.8339	23.6532	24.4079	26.9443	21.1276	20.3816	0	22.1608	23.0323	26.089	24.3794	0	24.1661	21.9786	23.0116	0	0	20.8164	19.6943	0
26.9812	0	0	16.1469	23.8754	26.7541	38.2078	31.2962	23.9692	25.8697	26.6552	0	23.5091	27.634	27.7783	0	24.2431	24.2756	24.2851	28.4387	23.1849	22.3313	25.8792	0	24.5408	22.269	0	32.8212	23.8301	0	33.0047	0	24.3971	28.5135	20.6578	18.7387	17.1755	24.1326	22.7167	27.6844	26.7595	0	25.7795	22.6243	23.7881	20.3934	20.5845	21.4236	0	20.7942
27.6003	0	0	0	24.3838	27.9941	37.2794	32.1982	25.558	26.7826	26.7246	24.0985	23.3399	26.7934	28.1506	0	25.1593	25.798	25.2334	29.4384	21.9341	22.0261	25.3718	0	25.6139	21.8175	0	33.8115	23.6292	20.0057	34.1046	19.3348	26.753	28.3853	0	20.5457	20.7786	23.5614	24.6425	26.8219	26.6622	0	26.046	22.2446	24.7108	21.0782	20.07	21.1986	0	0
22.7291	22.76	21.2897	22.0084	20.4535	24.3955	31.4148	28.9297	22.1138	22.5532	30.2014	0	23.3273	23.5761	21.6446	22.678	21.8812	0	22.7621	25.5693	0	24.758	22.5692	24.8383	21.4589	24.1526	24.3522	30.4963	25.0566	0	30.4589	18.8155	0	27.2656	19.195	22.1775	20.6906	20.0601	19.3536	23.9723	19.9429	21.9046	20.2203	20.2744	21.7848	26.4521	0	23.7706	20.2537	23.02
26.414	0	0	0	22.7342	28.3049	38.2266	32.6188	25.9613	27.125	27.5559	21.2843	23.4477	27.8339	28.0991	0	25.6459	25.2545	25.1766	29.2707	22.9499	21.934	25.0575	0	24.1566	21.3991	0	34.1722	26.992	23.9236	34.4499	0	27.0584	29.1639	0	0	0	24.6734	24.3525	28.3187	28.6396	0	26.1596	22.5976	23.4418	21.7781	21.7613	21.4999	0	20.1963
24.6418	23.0197	23.1786	19.7302	0	22.959	34.6219	28.0074	20.3243	23.0124	30.553	0	24.055	21.6519	22.4281	23.2035	19.1171	19.0966	0	26.936	0	22.0252	0	20.6448	22.6406	23.772	26.6053	29.4178	20.065	0	29.5166	25.9053	0	26.3079	0	21.8352	22.9943	20.8433	21.4505	0	22.2401	19.9381	17.5745	19.9289	0	18.4193	0	22.9134	19.6564	21.8548
25.6437	20.9574	0	0	22.7893	29.1977	36.0206	33.3341	25.8025	27.0359	28.4858	0	22.2122	26.6534	26.811	0	25.2	25.6834	25.5916	27.5632	22.3639	22.0106	24.8954	0	23.8713	22.6703	0	34.6966	26.7429	24.994	34.8534	20.3493	24.3129	27.9383	22.2126	21.1299	17.9622	22.4133	23.118	27.0453	24.1193	0	24.3386	22.0198	22.2854	21.4801	20.6351	20.6272	0	0
28.3918	0	0	0	24.3054	26.8388	38.2614	31.8721	24.7358	25.7945	26.4146	23.6765	23.4735	26.9376	27.9345	0	24.4812	24.5916	23.9328	29.3609	24.3589	0	25.0862	0	25.829	22.2036	0	33.4473	22.6144	0	33.6361	0	26.9777	28.4437	0	0	0	23.8141	22.8325	27.9546	28.4397	0	26.0682	22.8406	23.1237	22.148	22.058	20.5458	0	0
23.133	20.0628	0	0	19.6469	25.0698	36.2493	29.3955	22.8724	23.5814	26.4413	0	22.7141	26.8242	26.7328	0	22.473	23.9582	22.0298	28.1615	19.028	0	25.2111	0	23.1537	0	23.3677	31.2083	21.345	19.7007	31.5399	19.4928	23.7903	27.9963	0	19.7425	18.4119	22.8363	21.9976	28.5244	24.6975	19.1323	24.1612	21.5652	23.0673	22.3441	22.4949	22.1137	0	19.4004
0	19.3951	0	0	0	24.1263	32.2827	28.6518	21.0423	22.3171	29.5331	21.0219	21.9766	23.5943	26.7026	21.5095	21.7535	24.5665	0	25.4249	22.9072	17.6269	24.8876	0	21.3197	20.2124	0	30.0208	18.7433	0	30.6034	0	0	26.4908	0	21.1851	17.6929	20.8374	22.5092	0	24.1391	0	20.3278	22.1629	0	0	0	19.7102	19.4185	0
22.7458	19.6204	20.2894	0	0	24.6071	34.0977	29.3071	22.377	23.5192	26.7229	0	22.1293	26.0718	24.4275	0	22.3849	26.8121	22.7972	28.582	20.7999	0	0	0	22.851	21.4739	21.9713	30.6862	21.8374	0	31.0962	19.9942	21.9998	27.0581	19.3389	0	17.4749	22.2254	21.5428	28.3633	23.9126	20.1787	23.0705	19.9721	24.0695	0	23.5389	20.0151	0	0
23.2388	0	19.0603	0	0	25.5477	29.9171	29.8568	23.3664	24.4728	27.5119	0	23.1517	25.2287	23.1497	20.2035	23.7834	22.2289	23.5497	26.3991	19.6141	21.5628	24.8307	0	22.9906	21.5628	19.9321	31.9072	22.6617	22.1221	31.8738	0	19.1044	25.7959	0	20.5944	0	22.8522	22.0869	21.5847	24.2433	18.9748	20.4182	20.9161	0	21.4222	23.4563	21.1893	0	0
21.1258	0	0	0	0	25.1989	35.3148	29.5252	24.5065	24.5169	25.3552	0	22.6081	27.4384	23.6068	0	22.943	25.6495	23.6428	28.0535	22.2982	20.6353	0	24.1412	22.2159	0	20.0534	31.3306	22.6083	21.8436	31.5894	0	19.9091	27.8524	0	19.77	17.6973	20.8202	21.6434	24.6311	25.0824	18.5556	21.811	21.6393	21.4301	21.8055	0	21.7427	18.888	17.812
27.6099	0	0	0	23.8896	27.0392	37.8208	31.3246	24.97	25.6664	26.3425	0	23.4792	27.69	27.3112	0	24.4342	25.1929	24.5473	29.2329	23.4885	22.3538	24.4984	0	25.6813	21.5613	0	33.2128	24.2476	23.213	33.276	0	27.4902	28.9104	0	21.7475	0	24.3048	23.2813	27.7939	26.3289	20.7156	26.112	22.034	23.5976	23.2129	22.5883	21.3059	19.548	21.3834
27.8938	0	0	0	21.4381	27.6352	36.3845	32.0789	25.4201	26.6563	27.585	0	23.8539	28.606	27.9027	0	25.2977	25.3855	24.9662	28.6549	23.1316	24.2238	25.6188	0	24.5835	22.0881	0	33.8111	27.7708	24.7851	34.0021	20.2899	23.9765	28.65	0	0	17.0221	24.1	24.6237	27.6111	26.1915	0	25.2449	23.0856	23.9337	20.0749	18.7527	23.6435	0	17.901
24.1474	0	19.899	0	0	25.3186	38.524	30.403	23.2233	24.6679	25.6015	0	23.2538	29.1359	25.542	0	24.7517	25.641	23.8544	27.6544	23.5158	22.292	25.6621	0	22.998	0	19.7099	31.8735	22.0915	22.5874	32.2791	0	23.5158	29.1391	0	0	18.3119	23.408	23.9086	26.2426	27.4818	19.6055	24.1601	22.9326	21.9374	24.7165	0	23.0339	20.3103	19.9791
22.6704	0	0	0	20.7971	25.0134	36.9664	29.451	24.3636	23.6794	26.534	0	22.4908	28.485	27.7246	0	22.3867	25.0621	22.8276	27.3372	23.5258	0	26.0298	0	23.1133	20.5322	17.8335	30.9207	21.0638	19.3771	31.353	21.3836	23.0574	29.0647	0	18.928	17.1451	22.4458	23.359	26.6885	27.1688	17.7486	23.8006	22.4963	22.8911	0	0	21.2656	0	0
26.1276	0	0	0	22.8145	25.8952	36.1798	30.232	24.5636	25.0845	25.9975	0	23.1076	27.0107	26.6535	0	23.5224	25.1766	24.3838	28.9334	23.1264	0	25.1542	0	24.4518	21.744	0	31.6126	24.6871	23.1944	31.6415	0	23.5888	27.1536	0	17.8488	18.0474	23.8687	24.0328	26.7746	25.2368	0	25.1496	22.4083	23.6825	22.9875	0	22.3804	0	0
23.4926	0	0	0	22.9731	26.3841	38.0203	30.9573	26.0451	26.5081	26.1786	0	23.0811	28.5985	23.6714	0	25.7165	25.2094	25.5929	26.8398	19.9456	0	20.7613	0	22.8947	22.8684	22.1021	32.3699	24.48	23.4638	33.102	22.3261	21.8	28.229	0	0	18.0801	23.7136	22.9994	27.9432	26.2769	0	24.197	20.8153	23.5131	19.7752	21.0711	22.0529	0	0
21.6513	20.5729	0	0	19.8835	28.55	35.8876	32.7723	25.418	26.7465	27.5677	0	22.5791	24.4505	27.6095	0	25.0931	24.534	25.2704	29.2348	22.1691	0	23.7283	20.588	25.1137	0	0	34.0847	26.8025	25.0008	34.5789	0	22.5956	26.9111	0	20.8316	17.5085	24.6685	23.6562	26.9735	27.7475	0	23.378	22.7354	22.0218	26.5436	0	21.1888	0	0
20.5581	18.6425	0	0	0	25.0763	31.3095	28.9673	23.0166	24.0144	25.815	0	22.3343	26.5458	26.2896	0	22.8524	23.281	22.7632	25.1613	21.2167	23.1367	22.3488	24.4552	22.236	20.4363	19.9825	30.6668	21.4844	19.4715	31.0024	0	0	27.1213	0	20.1962	0	0	21.8506	23.7287	21.8608	21.0754	21.1939	22.154	0	23.01	0	22.1433	0	19.0429
28.9808	19.2713	0	0	24.0067	28.3954	37.7654	32.6226	25.5306	26.8215	26.7498	26.2296	23.5745	28.0983	28.7879	0	25.2719	24.6049	24.9865	30.1813	22.2029	0	25.5988	0	25.6735	21.1737	0	34.2326	25.3928	24.5189	34.4457	20.1942	26.2868	28.1584	0	21.2721	18.431	24.5907	24.4261	27.8774	27.449	0	26.7381	22.2618	23.0601	22.8783	0	21.2558	0	21.3513
27.6769	0	0	19.1965	0	25.8865	38.1505	30.5787	23.9627	24.6993	26.8059	24.9419	22.0279	27.0075	28.9325	0	24.2148	24.9206	23.6968	30.693	21.11	23.6831	23.3269	24.4537	25.6268	20.6136	0	31.9774	23.7068	0	32.2886	21.7185	24.7894	27.4475	0	0	0	25.1155	22.674	26.3058	28.5385	0	25.3913	21.1999	22.1897	23.9543	29.2033	0	0	0
23.1991	19.0476	0	22.3462	0	28.0108	37.2996	32.1893	24.6551	26.053	26.8357	0	23.38	27.5221	26.6965	0	24.4628	25.3902	24.3825	27.5711	23.2702	0	26.3795	0	23.1911	19.6803	20.1617	33.3119	25.3864	20.7991	34.0666	0	22.6049	28.9283	0	0	18.9373	22.5467	22.5996	27.4303	26.0534	0	24.5648	22.8265	22.9614	23.7127	18.2629	21.8854	0	20.684
25.5965	22.453	22.4854	18.1439	22.4408	25.9166	34.6967	29.276	23.0937	23.5791	27.6222	0	23.9365	23.9922	24.7353	21.1574	22.1848	20.0571	22.7196	27.9069	20.9251	24.8592	0	21.1946	23.3761	22.936	26.1572	30.7635	25.5537	23.1242	31.0335	19.5113	0	27.9664	0	22.4175	23.8688	22.713	22.7571	23.7447	23.9918	22.1347	20.4217	20.4925	25.1746	23.1875	23.9194	22.7497	19.1128	21.8975
25.5886	19.7237	20.6291	15.1263	23.6518	26.3356	36.3653	30.7726	24.1498	24.7806	26.5348	22.529	22.2471	27.9136	27.0695	0	23.5018	25.1447	22.5893	28.0514	23.1096	21.5919	24.5697	0	23.0577	21.6936	19.8473	32.3256	22.9501	20.0056	32.7523	20.5083	23.4075	28.6165	0	19.603	17.6769	22.5592	24.6687	26.5078	24.9779	20.2837	24.5366	22.662	22.0709	23.8684	21.4991	22.6544	0	20.1189
26.299	19.4102	20.2996	18.5469	21.5813	26.73	35.7576	30.9812	23.4551	24.9354	26.7289	0	22.8443	26.7821	27.0788	0	23.9575	22.0046	23.5328	28.8486	0	21.9452	22.6835	0	23.5856	22.4414	20.0812	32.5559	24.6478	22.6009	32.6492	23.5689	22.3536	27.3001	19.8607	20.1922	17.5407	22.9092	22.0658	24.7494	24.2369	19.2585	21.283	21.4358	0	20.9784	0	21.7272	0	19.0294
22.3097	0	0	0	21.4407	27.4257	32.9613	31.2816	25.3965	26.1151	26.8938	0	23.191	28.0085	22.2649	0	24.9713	23.6529	24.9045	26.064	22.9015	0	24.2942	0	22.2165	0	0	32.6003	27.275	24.4705	32.8963	0	24.7611	28.8189	0	18.5422	18.4448	23.5314	22.8719	26.3335	23.515	18.0748	24.4343	21.8398	22.7442	25.9529	27.298	22.6743	0	19.6016
22.8999	21.9119	22.7964	21.9337	0	25.2512	30.0083	29.6705	22.6122	23.4494	30.5771	0	23.4366	23.4132	21.9211	23.3622	22.2616	0	21.6208	26.292	0	25.7944	20.1802	20.7869	21.0283	24.0959	21.2966	31.7827	25.0875	23.1768	31.7621	21.4226	18.421	26.3226	19.3829	22.4131	18.9464	18.7458	19.444	26.3203	19.1604	21.0333	21.0866	19.8085	22.6161	24.0303	0	24.4332	0	22.7439
28.1906	0	0	0	21.9378	28.8981	37.1755	32.8469	26.3226	27.1734	27.4229	22.3674	23.4508	28.4539	28.7074	0	25.8325	24.7926	25.5089	29.798	23.4071	22.826	26.1103	0	26.1279	21.4772	0	33.7944	26.1915	21.7418	34.3305	20.6464	23.3119	28.5201	0	0	18.676	23.1126	23.1432	26.7412	27.4479	0	24.8091	23.1755	23.8315	22.2041	18	21.535	0	0
23.2968	0	0	23.0538	0	26.8788	37.0009	31.196	24.025	25.2979	26.1171	0	23.3793	28.7609	22.7763	0	24.072	24.8914	23.9047	27.3171	23.0401	0	0	0	23.4863	0	20.1747	33.0687	26.1021	22.399	33.293	0	21.5164	29.1882	0	20.329	16.9001	23.2488	23.3336	28.5548	27.0854	0	26.0927	22.7441	25.6793	24.9641	25.7908	21.1619	18.7888	0
22.6034	19.9577	19.9435	21.0869	22.2725	25.8818	29.2072	30.2766	23.3106	24.2601	32.0632	0	24.2088	0	23.1242	23.4736	22.8451	0	22.8912	26.1932	0	21.7216	0	20.8897	20.918	24.1436	24.4105	31.5059	22.7828	18.6906	32.0943	24.6526	0	23.3324	0	21.1054	19.5215	0	20.5992	26.8296	20.3509	0	0	18.4439	22.6795	0	24.0209	21.7522	18.9318	20.3775
27.2432	21.197	23.3144	19.9247	20.826	23.9067	38.0262	29.4309	25.765	23.5617	26.8087	0	23.3515	25.8172	25.037	0	23.2464	22.381	0	29.0586	0	22.6344	21.8922	24.4941	24.7686	21.6997	25.9093	31.1526	21.3465	0	31.4511	0	0	28.4525	20.8846	22.3783	22.8561	24.4779	22.9011	23.8855	27.9294	21.863	24.0302	21.4506	0	25.7999	0	23.5078	0	21.7701
25.3376	19.2558	0	22.2802	20.058	24.0592	36.4011	28.9663	22.3428	22.6768	25.0559	0	23.4887	28.1027	24.9518	0	21.401	23.1322	24.6794	27.9414	21.2304	0	26.704	0	23.3037	0	0	30.8079	21.7937	0	30.7643	17.7088	23.8215	27.8633	0	19.8786	0	21.3576	23.9885	26.63	25.2251	0	22.4465	21.8921	22.8967	0	20.8006	21.311	20.3744	22.9614
26.2805	0	20.9392	0	22.9451	28.291	38.1798	32.7069	25.4763	26.3499	27.1713	0	23.1128	26.1291	27.6719	0	24.8851	25.6526	24.4756	29.7053	23.0627	0	26.4679	0	24.7537	22.4597	0	34.0886	25.7496	21.9629	34.4554	0	24.6473	28.5013	0	19.5237	19.6857	24.516	23.9783	26.7055	26.8294	0	25.5214	22.3989	23.1451	22.6565	27.3585	0	0	20.4972
28.0027	21.5382	0	18.6545	0	26.0411	38.4573	30.6866	0	24.0383	29.2847	0	22.9465	27.1153	26.5397	0	23.0071	24.8655	21.2633	29.6477	21.985	26.3959	23.2735	23.9443	26.6162	21.2763	22.6033	32.6859	23.8822	19.1327	32.1861	0	21.9647	28.1019	21.5388	21.8601	20.669	24.9669	22.6579	24.8487	27.9771	20.8888	24.8554	22.51	0	24.9273	0	21.6834	0	17.3603
25.1137	21.0895	21.3235	0	22.8224	28.5749	30.9323	33.5493	26.9647	27.307	28.3883	29.068	25.067	0	22.6901	23.9411	26.5873	23.0737	26.396	25.6809	19.7457	23.5165	19.7421	23.0189	22.4136	24.7821	25.6778	35.1196	26.2648	21.4895	35.791	26.0613	0	25.838	19.5718	21.904	19.2905	0	22.1755	23.9728	21.2489	0	19.9768	19.3195	0	23.9103	0	22.9088	0	21.4244
24.3108	18.4045	0	16.9191	0	27.27	36.2837	31.7681	24.8657	25.763	25.8867	0	21.8303	27.5815	25.3815	0	24.7483	24.6365	24.725	31.2288	19.9808	21.09	21.7159	23.0595	24.2445	0	0	33.3311	24.8959	21.1182	33.6613	0	25.5117	27.3477	21.0189	20.1255	15.4536	23.6271	21.877	24.4318	27.2064	18.4203	23.359	21.0486	20.4951	22.3132	0	0	0	0
26.7376	0	0	0	22.1665	28.3522	38.0508	32.55	26.1056	27.2412	27.8499	24.4267	23.9434	27.9837	27.9464	0	25.9098	24.4659	25.6403	29.0385	23.4709	0	25.3525	21.8128	24.5784	21.6512	0	34.3971	24.576	22.9122	34.6828	20.513	25.3345	28.0099	0	0	0	23.6948	23.9972	25.8046	27.8544	18.1539	23.3776	22.8086	22.8961	22.6936	24.6704	21.673	0	0
25.4963	19.962	17.7468	0	22.2293	27.6341	35.7596	32.2115	24.4855	26.269	28.2052	0	22.3404	27.1222	27.8746	0	24.505	23.8817	24.4933	29.1824	22.9799	22.9234	23.4028	0	24.5186	22.5006	22.028	33.6434	24.398	20.5947	33.8793	20.7245	24.3971	27.9521	0	21.7283	18.0267	23.1387	24.2018	26.3884	25.6774	20.7997	24.0473	22.4369	22.2393	23.0378	23.5299	22.3742	0	20.2954
25.7919	19.7597	0	0	25.0027	29.0104	37.3728	33.1677	26.5754	27.3974	28.1145	0	23.8395	27.2342	26.805	0	26.1027	25.2408	26.0443	27.3686	23.7058	21.5358	25.4366	0	23.1191	22.4243	0	34.5512	27.0637	22.9293	34.8868	0	23.1986	28.7684	0	18.0781	18.2036	22.9292	24.765	27.5099	25.9477	0	23.946	22.816	24.3158	19.9049	20.5736	21.1694	19.8655	19.6183
25.2185	0	0	20.0027	20.4998	24.7349	35.0917	28.9353	23.374	23.7908	27.8541	0	23.5487	25.4401	27.8533	20.783	23.16	23.8921	23.0513	27.6903	23.4869	21.8794	24.1882	20.0395	23.1836	23.233	0	30.3148	22.9533	20.1678	30.6616	22.5433	25.3912	26.9931	18.4114	0	19.5258	24.0274	24.159	25.8062	23.5336	0	23.7282	20.4807	21.7404	0	0	21.7998	0	0
23.1221	0	0	0	0	25.2775	38.2063	30.0518	23.673	24.3008	27.1897	0	22.2006	25.5818	26.8485	0	22.6186	23.4809	24.2972	28.4522	22.8063	21.9574	24.9245	20.7064	24.0774	0	20.1901	31.7701	22.6703	20.4453	31.9705	0	25.906	27.2526	0	18.0688	17.4856	25.1908	22.1797	27.1713	27.5736	0	24.3042	22.4029	23.5807	0	0	21.2175	0	0
25.2353	22.1529	21.6826	19.4856	23.8157	27.0844	34.5884	31.6654	25.3095	25.926	30.4854	25.2111	24.2136	24.5023	26.3011	23.7618	24.835	24.377	24.4611	26.7151	0	24.0118	20.9766	23.8718	22.7723	23.1948	24.8542	33.4768	25.4231	22.9578	33.4815	24.1331	21.696	27.6381	0	21.4681	22.7268	20.571	25.0723	24.154	24.478	21.746	23.9601	21.4047	0	24.4807	22.4756	23.1095	18.7287	22.1183
27.5226	19.2008	0	0	24.6815	29.0926	37.8943	34.068	26.7725	27.7758	27.427	0	22.9763	26.7998	27.092	0	26.4922	25.4486	26.4311	28.3737	22.9312	23.4364	25.2416	0	24.6103	21.7763	0	35.6065	26.5119	22.4141	35.8331	0	24.2818	28.914	19.371	0	18.8282	23.6772	24.1086	28.3201	26.1604	0	24.6541	23.0343	24.6188	19.6013	0	21.8928	0	20.2438
20.9421	0	0	0	21.023	30.4036	35.0347	35.0638	28.0317	28.7013	26.7705	0	23.1788	27.6896	24.9147	0	27.3728	25.2191	27.5131	27.1479	23.2031	22.0339	25.8049	0	23.1107	0	0	36.5877	29.7231	29.125	36.8989	0	25.136	28.6749	0	0	18.2376	21.9367	22.1085	25.9538	24.5268	0	22.987	22.6865	22.4456	24.1298	22.3074	22.219	0	0
25.6905	20.1335	20.8318	18.3276	20.515	26.3695	35.3769	30.813	23.4214	24.5476	28.2511	0	23.3215	24.9649	23.8986	22.7403	22.8784	21.6595	22.9342	28.9647	0	26.1703	22.1323	18.8976	23.4721	22.4104	22.2677	31.9437	23.6879	20.5717	32.2002	0	20.6614	27.8918	0	22.1246	20.2226	22.9134	21.7477	24.8075	24.7551	21.4484	22.8048	20.7766	20.1205	28.9749	0	23.8758	0	22.6271
26.2919	0	0	17.5234	23.6629	26.4997	37.1325	30.8209	24.3544	25.6117	26.4205	0	23.7098	26.9621	27.577	0	24.1924	23.5163	24.0617	30.3691	21.6884	21.077	22.6955	21.2096	24.3	21.7176	0	32.7783	22.3671	19.0608	32.6877	0	24.1357	27.2105	0	0	0	23.6037	23.1194	26.42	25.226	0	23.9908	22.5127	22.4362	22.6895	23.7666	20.267	0	0
24.2114	19.6006	0	0	24.2969	27.1645	38.0658	30.1506	24.5451	24.7796	27.3275	0	23.5643	26.9904	27.5703	0	23.7232	25.5499	23.3713	28.563	20.2314	22.2128	24.9447	22.1187	24.5802	23.2516	23.815	32.3435	24.0295	21.4313	31.9494	21.9998	28.3754	27.9535	20.7069	19.9539	0	25.5257	24.2029	26.9993	27.3878	20.1674	25.5179	20.7038	21.7021	0	21.8877	21.8187	0	0
25.0321	0	0	0	24.7934	26.6412	36.1222	31.2913	24.2954	25.2947	27.5894	0	23.5589	27.2453	26.5504	0	23.913	25.6944	23.7392	27.7156	23.5368	0	23.3394	0	21.2526	22.3244	20.3223	32.8468	25.6665	23.0011	32.9477	0	21.9894	29.0265	0	0	17.8487	21.3414	24.0002	28.3459	25.0981	0	23.423	22.449	24.644	19.52	21.5671	20.6948	20.9125	0
22.4357	21.4392	21.4247	21.0506	0	25.5263	30.4937	29.447	22.7417	23.6187	27.3918	0	23.3655	26.9952	23.9199	22.2166	22.5339	27.048	22.5829	26.0819	23.2996	22.5007	24.3264	23.6442	21.2127	24.0901	23.2741	31.0394	23.5487	20.9741	31.3791	22.9951	21.6899	27.2836	18.5053	21.3414	19.9145	21.0001	23.1962	24.5613	20.2371	21.7312	19.2571	22.9639	21.2684	23.8192	0	23.1302	19.2107	21.3911
22.9002	19.4129	0	0	0	26.7083	36.7613	31.022	24.8532	24.9832	27.0031	0	23.5299	27.7475	26.3355	22.4682	25.2511	24.1342	25.1573	27.9523	22.8252	21.0206	23.8451	0	22.7044	20.2486	21.4227	32.7266	24.3085	22.0234	32.9518	0	22.1668	27.8748	0	18.7124	0	20.3668	22.7894	26.7277	24.0616	21.5401	22.9312	22.4951	22.962	24.117	0	22.2426	0	21.4316
27.4132	0	0	0	24.874	27.6149	38.0878	31.819	25.0653	26.306	26.9876	0	23.4843	27.8929	28.3432	0	24.6848	25.6646	24.5676	28.7315	24.186	0	25.5851	0	24.9393	21.9152	0	33.2973	26.8887	25.7386	33.6414	24.3727	25.6841	28.9776	0	0	17.2042	24.5013	24.1894	28.5408	27.4033	0	25.7125	23.0786	24.6073	22.1739	0	20.1951	20.5202	0
28.6514	18.634	0	0	23.7382	26.1758	33.6315	30.5308	22.9726	24.324	26.9099	0	23.0554	27.7501	24.5924	0	22.1415	25.6848	22.8822	25.8031	22.7155	23.5784	25.5068	0	23.1998	21.9365	21.2685	32.0176	23.8002	20.0429	32.0702	0	24.0253	28.5754	0	18.4729	18.3724	21.9341	22.1111	24.9594	22.193	19.6236	23.2713	20.9899	21.2365	21.3983	0	21.6933	18.6559	19.6507
24.6436	22.664	21.698	21.9236	21.5008	26.9212	31.461	31.8016	24.5793	25.4256	31.917	0	23.9444	25.3883	24.3927	23.6559	24.5675	21.8352	24.2138	26.7515	0	24.6118	21.4658	20.6508	21.3563	24.0415	24.2385	32.7762	23.7497	20.554	33.0284	24.2696	19.3981	26.6615	20.1983	22.1934	20.3847	18.6553	23.4328	25.2388	21.407	20.6144	22.5775	21.7697	20.599	23.7082	18.8848	23.92	0	22.3299
25.6411	0	0	20.8834	22.7948	26.0225	36.4666	29.8322	24.0989	25.0926	28.1476	0	23.2806	27.6291	27.7981	25.2733	23.6732	24.1279	24.7205	29.0839	22.228	24.7411	26.0256	24.8088	24.4133	22.3122	0	31.0009	23.8861	21.5267	31.5791	0	23.118	27.4032	0	0	19.5095	24.0048	22.5603	27.9237	26.8268	23.3914	24.3493	22.0998	24.3531	0	23.0999	22.2232	0	22.0131
24.4033	0	0	21.4782	0	25.8449	36.6192	32.0546	25.9192	25.4496	27.719	0	23.2656	26.4752	22.0486	0	24.1889	24.9131	23.9181	29.2596	21.8825	20.5976	0	0	23.2976	0	23.1187	32.6465	26.422	25.5452	33.3051	0	22.6234	26.6653	0	0	20.9601	22.2996	22.7259	23.5828	23.5079	20.7708	22.9364	22.9348	0	26.4784	0	22.4735	0	0
21.4464	0	0	0	21.7346	26.0059	36.2865	30.7948	24.0903	24.9272	26.8969	0	23.7061	28.1431	26.7855	0	23.1979	23.6653	23.6316	26.1408	22.8967	23.3088	26.1512	0	22.992	22.7743	0	31.8483	23.4597	0	32.534	22.0356	21.9802	28.4818	21.5243	0	18.8802	21.1317	21.9309	23.8924	24.4253	0	21.8612	20.9954	21.9544	0	0	20.6007	19.5118	0
21.8378	20.2018	20.3656	18.4708	21.8698	27.1036	34.5515	31.5826	24.5178	25.1823	28.5692	0	23.5473	27.0534	22.0572	0	24.3039	21.0087	24.2395	26.9117	21.6043	21.2692	21.2103	21.0506	22.3898	21.3902	22.7767	32.8568	27.0479	23.3662	33.5246	0	0	27.6835	20.1187	21.3122	0	21.2979	20.607	22.2528	24.1386	20.058	22.2637	0	0	24.4222	0	21.5089	19.6224	18.8005
25.389	22.496	20.8986	21.4617	0	25.3153	34.9861	29.3927	23.2789	25.099	31.3069	0	23.7573	22.7564	22.7712	24.2772	23.7276	24.1461	23.3856	27.6068	0	25.3601	23.5142	22.5716	23.4262	23.3836	24.878	31.2249	21.8565	0	31.6937	22.5886	0	27.9718	0	22.6215	21.6197	23.6626	22.6146	21.6147	25.9611	22.5126	22.7652	21.6727	18.1515	23.7493	19.2339	23.3422	20.0755	23.2869
25.3352	18.9899	0	0	0	22.3351	35.8757	26.3101	24.5268	22.442	25.9955	19.9179	23.456	27.3421	24.8059	0	23.4015	21.5222	26.5876	27.3192	0	22.91	0	0	22.9892	20.8079	23.1318	28.3499	24.2815	0	28.3596	18.1274	22.9249	28.5707	0	21.7243	19.2582	22.7672	18.7153	27.6644	24.9024	20.8729	24.046	21.2919	22.8921	27.186	23.7592	21.8714	19.27	20.1966
0	19.7128	0	0	22.1868	26.1543	28.7002	30.5618	23.5366	24.5512	27.0831	0	23.8295	24.3881	24.318	0	23.4975	24.2889	23.3525	26.482	19.2402	18.6147	22.6901	21.0309	21.4097	0	27.3018	32.194	22.1209	20.8149	32.5153	0	0	24.8842	0	19.6985	18.2231	20.4333	21.0733	25.3186	20.2715	19.4675	22.1539	0	21.443	24.3248	21.8306	23.16	19.995	18.3295
27.2686	0	0	0	24.3123	27.1856	37.7628	31.8979	24.8506	26.2421	27.3151	0	23.0029	28.3954	27.8992	0	24.6552	25.8779	24.5569	28.8373	22.9008	21.1565	25.3714	0	24.4516	21.4804	0	33.2493	25.5805	20.4692	33.4646	0	27.0291	29.2749	0	20.523	18.8473	24.1416	24.0108	28.1762	26.3069	0	26.0194	22.6787	23.9806	20.3705	21.1612	21.6204	0	19.9868
21.3777	0	0	0	19.6342	28.8735	34.7466	32.8038	25.7644	26.4584	27.0865	0	23.0147	28.4486	25.832	0	25.4249	25.4307	25.1842	25.7443	23.0103	0	27.8597	0	23.2746	21.101	22.4548	33.8305	25.2715	21.2772	34.5938	0	22.9956	27.9105	0	0	18.1549	21.1315	22.7353	25.0988	23.6781	0	22.1968	21.9495	21.0714	0	0	0	18.7617	0
27.3565	0	0	0	22.6071	27.7695	38.4777	31.8257	25.0251	25.675	28.7447	0	24.1309	27.6847	28.3841	21.6944	24.1225	25.713	24.2645	28.5108	23.2221	24.6363	26.0816	0	24.9504	20.3466	0	33.246	24.3066	0	33.4957	0	25.1012	29.6946	0	0	16.973	24.6353	23.9678	28.2563	28.0695	0	25.8866	22.8293	24.9222	21.4704	0	0	0	0
23.6095	22.2727	23.4606	22.5569	19.7777	23.456	33.1272	27.7706	22.3371	22.3717	32.0423	0	23.3812	22.6233	22.1659	24.0755	21.9087	19.6838	0	26.9069	0	25.5165	21.6441	25.3769	21.2909	24.4079	24.3803	29.5766	21.0153	0	29.603	0	0	26.2926	0	22.8908	20.9877	22.0216	21.233	24.1586	22.2668	21.9259	22.7435	20.1459	20.4678	26.2579	21.6331	24.5593	19.0536	21.9271
24.1785	19.2747	0	0	20.1707	26.9708	37.3076	31.6757	24.2038	25.7972	28.1107	21.152	24.1447	27.7343	27.1114	0	24.3294	25.6544	24.3537	27.1335	23.5829	19.6277	25.4577	0	23.4526	0	19.0437	33.4088	21.874	0	33.7861	0	25.0055	28.7532	20.0748	21.4271	15.9997	22.2395	23.1221	23.8017	26.8233	0	22.1046	22.3641	19.7688	22.3771	23.0652	22.5505	19.7228	21.6075
23.1927	21.4866	20.3188	22.0161	20.4915	24.6273	32.3777	29.4334	22.672	23.4066	26.1375	0	23.6211	24.1162	23.8854	0	21.7727	19.2414	22.8998	25.3998	19.8271	24.2977	24.2763	20.6688	20.5178	22.1899	24.7318	30.4831	22.9937	19.2022	30.9288	21.8219	0	27.4952	0	21.4338	21.8143	20.9519	22.1537	22.6839	20.5718	20.9475	20.0041	20.1676	0	24.9034	0	22.7466	19.9149	21.0235
24.7284	0	0	0	23.5864	24.8705	37.9129	29.6832	23.8612	23.5914	26.7862	22.3532	23.1566	28.1056	26.8313	0	23.8586	25.0887	22.9533	28.7501	22.0397	23.4952	25.9324	0	23.5513	21.1953	0	31.4518	22.0283	0	31.6478	0	23.6871	29.1261	0	0	19.5113	23.89	23.4215	28.7395	27.0222	0	23.7002	21.9548	24.5019	22.4909	21.6996	22.5185	0	21.1615
25.3186	0	0	0	20.9563	28.963	37.2638	33.052	26.1985	27.8305	27.871	0	23.9201	28.6356	27.3087	20.3491	26.2191	24.0652	25.8302	27.3839	24.174	0	25.9644	21.0963	23.9569	20.8608	0	34.5349	25.1652	24.0783	34.7999	20.9875	25.9097	29.1709	0	0	0	22.7122	23.6492	25.16	26.3993	0	23.7021	22.6711	21.2496	23.3857	21.9711	21.134	0	19.2286
24.1823	20.1463	0	19.5876	20.4116	27.4588	36.3884	31.9054	24.3998	25.7366	27.3899	0	23.0765	28.1074	26.0799	0	24.1169	25.2629	23.9454	29.5076	22.7926	20.5505	26.5136	18.3152	24.8082	20.821	0	33.3907	24.4972	19.7101	33.5621	0	21.2604	27.1989	20.444	19.7756	16.7503	23.571	23.5341	27.0015	25.6143	0	23.5816	22.0724	22.4029	0	0	21.0916	20.8787	0
24.5373	21.1999	21.0576	20.3803	21.5462	27.1441	30.78	31.0761	23.9463	24.9737	30.3872	21.9387	24.3241	25.7393	23.8286	22.8373	23.2504	21.1791	23.7537	26.4138	25.2436	22.7187	24.5003	23.0543	21.9002	23.6803	24.1244	32.661	23.868	21.551	32.8367	22.8545	0	25.7435	18.0273	20.9229	20.6501	23.1227	22.2554	24.9601	25.8511	19.3484	25.288	19.6368	22.8523	21.641	0	23.0645	18.4052	21.1436
24.603	0	0	17.972	21.9431	30.4994	37.0541	35.1102	28.0129	28.933	28.4768	0	23.5132	26.8066	26.9234	0	27.6773	22.2628	27.3709	28.0058	0	22.0506	23.4709	0	24.0914	21.3165	19.7845	35.8605	27.9176	23.7397	36.9782	22.1009	23.6171	28.0469	22.5764	0	18.8675	22.4762	22.3492	26.9812	25.9953	0	25.6471	21.3035	23.6523	0	18.7986	21.0903	0	0
26.561	0	19.1356	0	24.3748	26.5529	37.6341	30.9194	23.5087	24.7556	27.0045	0	23.1962	27.3718	27.9536	0	23.7582	25.4334	23.0503	29.015	23.2965	21.7381	24.8815	0	24.8363	21.6173	24.6281	32.6137	21.8194	0	32.6468	0	27.2556	29.04	19.5029	19.7341	18.4316	24.59	24.1129	28.3575	26.6949	20.1038	25.7191	22.9866	23.7432	0	0	22.1395	19.6653	19.7769
23.5879	0	0	22.4365	22.144	25.8955	34.9453	30.5959	23.3485	24.8823	26.6412	0	23.6991	25.5521	26.3698	22.2549	23.2408	25.5504	23.1314	26.0614	22.7768	21.0292	25.3466	0	22.057	22.4516	0	32.3082	22.9318	20.7637	32.3884	21.4378	23.6407	28.2566	0	19.9248	20.3099	20.997	24.4906	24.3541	22.963	0	22.2238	22.7984	21.247	19.8235	21.261	21.9814	19.0417	0
22.1475	22.6413	22.6675	21.7986	20.3607	26.0306	31.1627	30.3794	24.6502	23.3082	30.5961	0	24.3583	25.5973	23.2712	23.7078	24.1188	23.5944	23.7998	25.5519	23.1114	24.2749	24.9759	22.2726	22.7835	24.2105	22.955	31.5398	24.2378	20.7197	31.9491	22.1354	0	27.5256	0	22.1761	19.7829	18.5938	23.5809	25.252	23.6558	19.9577	22.3247	19.6885	20.1107	23.7453	0	24.3902	19.4679	22.645
24.6016	0	21.2058	17.7971	21.0083	21.891	34.0726	26.7957	22.7912	23.4193	27.7609	0	23.1998	28.5201	24.319	0	0	0	23.3584	27.1323	0	22.3133	20.7809	0	22.1965	21.4685	23.2932	28.6842	0	0	28.8384	20.7378	19.8469	27.6661	0	21.4492	16.8605	18.5066	21.0725	24.6058	23.9927	20.8048	19.8722	19.7316	20.8628	24.6271	22.0319	23.0162	19.9128	20.6358
0	0	0	0	21.7565	24.3453	28.7377	29.0949	22.294	23.1765	24.9133	0	23.942	22.9121	24.7571	20.43	22.1112	23.7739	22.6135	21.6584	21.0407	0	22.8762	20.8443	20.2466	21.0699	0	30.3911	22.6646	0	30.6992	0	0	27.2435	0	21.1003	16.8943	0	21.813	0	18.6899	0	0	19.8271	0	0	0	19.85	0	0
26.1752	17.7223	20.0063	0	21.6628	27.4922	37.4254	32.0166	25.9188	26.2545	27.3751	0	22.8974	28.5615	27.6239	0	25.3013	25.4549	25.1832	26.8868	23.3575	0	26.8496	0	24.7496	21.8654	0	32.9018	26.2578	24.8927	33.6194	0	24.1653	28.7322	0	0	0	23.2144	24.2972	27.9353	25.9921	0	24.2712	21.6541	23.4551	19.8323	0	0	0	0
24.2708	0	23.1068	0	24.2305	28.3631	36.6332	32.9602	25.3932	26.7916	27.5669	0	23.4962	27.8142	26.7319	0	25.0598	25.659	24.8845	28.7217	22.9835	21.5544	24.9311	0	23.4517	22.1867	0	34.3891	22.4115	0	34.8703	0	24.4813	29.9605	0	19.8662	18.7695	23.3877	24.4647	27.7276	25.1309	0	23.8295	21.8608	24.2442	0	22.6252	21.0795	0	18.2377
27.1819	0	0	0	24.6581	27.9837	36.2921	32.2389	25.0417	26.8991	28.3305	21.7991	23.6085	27.6838	27.1506	0	25.251	24.8499	25.0375	28.5869	22.9562	23.213	24.3165	19.2541	24.9684	21.2432	0	33.8366	23.8766	20.5358	34.1341	24.7384	24.5352	28.9371	0	19.1536	0	23.4703	24.3834	26.9493	26.8704	0	25.4224	22.5988	23.1662	22.7155	22.8744	20.468	0	0
22.7846	22.0843	20.6868	21.3889	19.5234	23.5129	31.8413	28.1267	20.4595	22.9001	30.3116	0	23.2455	23.4936	22.438	22.7541	21.1656	0	20.8998	25.5047	0	24.8294	20.4971	23.3229	21.2533	23.8065	22.8985	30.0166	20.7125	0	29.8556	0	0	27.3494	20.2506	22.1366	19.7235	20.3402	21.1782	23.5677	21.9239	20.5437	21.5215	20.3356	20.3313	23.9581	0	22.6153	19.9015	21.2845
24.6654	0	21.3844	0	0	22.7336	34.8438	27.8327	0	21.3922	25.1345	0	22.8351	27.5205	24.8122	0	22.5447	0	23.9817	29.4786	0	22.5017	23.7167	0	22.9424	0	25.5496	29.4285	23.5871	0	30.1102	0	0	27.7567	0	21.5267	19.0351	20.9124	0	23.0239	25.8563	21.3021	23.3842	21.6303	23.4045	27.8674	0	22.7373	20.2307	0
19.22	0	23.9111	0	0	25.9742	35.4058	31.9618	25.2016	26.3329	26.2533	0	23.7848	27.0922	26.5463	0	24.7224	25.1662	24.8011	25.8104	23.2307	0	25.4616	0	22.2951	0	24.5632	33.1762	26.8255	24.7097	33.5189	0	21.4952	27.8131	0	20.8852	17.4618	21.4236	22.9591	26.1419	22.7078	20.417	21.8785	21.7741	21.9839	22.2766	0	22.1211	19.8254	0
24.0909	22.3638	22.6528	21.8974	20.5032	26.521	33.9948	30.6052	23.357	24.7588	30.7636	0	23.965	24.3534	23.7758	23.3977	23.2078	21.1722	23.0538	26.5401	18.7115	24.0265	21.1108	21.6378	21.7077	24.1602	24.649	32.1299	24.1206	21.3334	31.9728	23.2712	22.9319	27.0818	0	22.4026	20.8402	21.5605	21.0447	24.6393	23.8016	21.1392	23.0889	19.7976	21.5335	23.6808	21.8967	24.1484	0	22.1178
24.4619	0	0	0	19.8838	25.8194	35.7711	30.0576	22.6221	23.8899	29.2217	0	22.8271	27.7657	25.1423	0	22.4555	21.6333	22.4593	27.5122	0	22.0255	21.4583	25.4779	23.4321	22.6724	0	31.7634	22.5824	18.7717	31.8742	0	20.7049	27.6015	19.6484	0	16.9022	23.1694	21.0707	25.0309	24.0216	0	23.4167	20.5646	20.7953	26.0672	0	23.8454	0	0
22.3705	21.8001	22.4473	22.5286	0	22.35	30.2709	27.2793	22.7796	23.4995	31.7374	0	23.3862	22.5856	21.3613	23.1982	0	0	0	25.8088	0	24.6977	0	24.7569	20.8466	24.3153	24.1253	28.7072	27.5139	0	29.2986	21.4959	0	26.3361	20.0065	23.0957	19.3012	18.7853	22.0173	22.8048	0	21.716	22.3683	19.499	0	25.2518	0	24.2574	20.3573	20.769
23.5756	0	0	0	0	29.0706	34.2192	33.4174	26.4875	27.3356	27.5903	0	23.1683	28.7664	23.8902	0	25.9544	25.3785	25.8991	28.0024	22.6144	0	23.4501	0	24.0173	0	22.7936	33.6058	27.2301	24.4312	35.0323	0	0	29.5619	0	0	17.4378	24.5665	21.9919	26.3379	25.8224	19.1373	26.4584	21.6609	21.629	24.0452	24.8032	21.399	19.9219	0
23.3227	20.5429	21.2041	0	21.0922	23.8854	35.1427	28.8552	22.419	22.8612	26.5423	0	22.7713	23.007	25.3821	0	21.7008	22.7261	20.9345	29.2204	21.6857	26.7681	22.9252	0	22.7331	21.9424	26.2897	30.4589	21.4771	0	30.3841	21.0542	19.8275	27.5104	0	22.4639	20.0396	22.7484	22.4115	24.4387	24.1377	20.3902	20.6385	22.0213	21.0177	29.955	20.0513	23.0911	20.2695	19.0773
26.166	0	0	0	24.4516	27.2848	38.394	32.0546	25.9166	26.7135	26.5559	0	23.839	27.6625	28.5608	21.7487	25.2965	25.0872	25.1744	29.6429	23.4921	0	24.8056	0	25.1775	21.8702	20.4094	33.4482	22.9702	0	33.7933	22.5953	27.0819	29.1413	24.231	0	18.3672	24.4744	24.7507	27.4519	27.4786	0	26.3003	21.429	25.1659	23.3273	0	21.4542	0	20.7692
21.8601	22.0703	0	14.3602	0	26.3566	31.3122	30.5278	23.6209	24.7186	28.3497	0	24.0469	23.0391	23.1546	20.8072	23.6616	20.8907	23.1454	25.1112	21.6572	24.0201	24.7605	0	20.9334	22.8484	24.6862	31.2228	23.9159	20.8156	32.1857	0	0	27.9286	17.568	22.3503	22.7007	18.4009	22.8128	0	21.2096	23.1534	0	22.4196	0	27.2102	0	21.7971	19.404	21.4112
20.4253	0	0	0	0	25.5977	33.6539	30.0545	23.0788	24.2413	26.0812	0	22.9949	27.2844	25.4702	0	23.4115	20.5919	23.2376	27.743	21.0524	0	23.0563	0	22.9728	0	23.1023	32.1378	20.8155	0	32.2965	0	20.7016	28.2186	0	20.4459	19.1299	21.4534	22.2844	28.6989	25.0616	19.7932	23.4772	22.2244	23.3946	22.4686	0	22.6913	0	0
24.5656	20.3701	21.6397	18.2495	22.8803	25.2506	35.9497	29.8762	23.0528	23.611	26.6693	0	23.3704	26.6261	26.8822	20.0624	22.2461	23.8786	22.6948	27.5854	22.0152	21.9735	23.0563	20.4641	22.3334	21.8283	22.9359	31.4183	22.8891	0	31.4927	0	22.544	28.4138	18.578	20.2971	18.8352	22.792	22.5484	24.6488	24.8641	20.8918	23.9615	21.7653	21.4937	23.629	0	22.3399	0	20.3039
19.1341	20.1352	18.4285	0	20.7982	25.9414	36.1534	30.4538	23.3466	24.3884	26.9093	0	22.5882	27.5574	25.7032	0	23.1264	24.9097	23.1618	28.7545	23.216	19.3337	20.7208	0	23.7172	0	24.3777	31.804	24.6051	20.4835	32.1525	0	27.066	28.336	18.4924	21.9184	16.2209	23.681	22.0266	25.3084	25.4641	19.916	23.4603	21.5178	19.7829	0	0	22.0537	19.019	18.9815
23.4324	21.9463	23.9398	22.0486	20.3796	22.2586	32.0503	27.8322	23.7838	22.8482	31.1077	0	23.8358	0	21.1367	22.5177	22.1064	19.2882	23.6209	27.4447	0	24.2413	20.9771	25.7645	21.3465	23.8343	22.8715	29.5472	21.9449	0	29.6693	25.5294	0	26.7516	0	21.7669	20.2194	20.4037	22.3983	24.1191	20.5449	21.2332	20.3619	17.1243	23.9509	26.05	0	24.8261	19.2651	22.6955
25.2749	0	0	0	20.6856	27.2441	37.2787	31.0496	23.8553	25.326	27.2231	0	22.9725	28.6271	25.2767	0	24.3003	25.0715	24.0329	27.8309	22.1421	21.8631	24.7776	0	24.5024	20.1992	19.158	32.5208	22.3087	0	33.3193	0	23.3568	28.9233	0	19.2143	19.5053	22.7298	22.1783	27.8819	27.0165	0	23.5869	21.2231	23.0052	23.5048	23.6522	21.1128	0	19.6331
26.2885	19.9249	22.1843	18.679	0	25.5544	36.0506	29.8915	23.3643	24.5636	26.6164	0	22.3891	26.9033	27.9532	0	22.9881	24.3247	23.5058	32.1873	22.1207	21.6807	22.2492	0	23.5728	0	18.5494	31.9407	24.6925	22.6836	32.0144	0	21.6007	27.985	0	20.6484	17.0841	23.145	22.9177	25.7612	24.89	20.9354	23.6836	22.2489	21.0731	23.8568	0	22.7674	19.0527	19.7164
27.0859	17.8876	20.9749	0	23.6747	28.8321	36.1145	32.7183	25.5283	27.0086	27.1157	20.7053	22.7374	27.398	26.9795	0	25.2945	24.8382	25.1909	29.4361	23.2916	21.5547	24.7305	24.6647	25.5661	21.7094	0	34.4899	25.663	22.4308	34.8853	20.4355	25.2784	28.8298	18.3689	21.0608	16.9621	23.0384	24.5299	26.8569	26.3766	19.2698	24.9208	22.5773	22.928	22.1311	0	19.8711	0	19.2299
26.332	19.4147	18.8182	0	22.4584	26.6098	37.0106	32.0621	24.8516	26.3469	28.0777	0	23.3149	28.903	27.2811	0	24.5608	25.8377	24.4422	27.3245	23.6659	20.7268	25.2423	0	24.0876	21.3626	0	33.4351	25.4865	21.5278	33.7355	22.045	26.7501	28.949	0	19.4479	18.0566	22.2785	23.9548	26.2005	25.4259	19.0674	24.3703	22.4524	22.4255	21.2349	18.9406	21.1962	20.287	0
24.4625	0	0	20.0453	21.928	26.4106	36.055	31.055	23.6362	24.3032	26.3243	0	23.1406	28.1908	26.1334	21.5648	23.5055	24.3039	23.1455	29.4983	21.0572	23.9813	26.6884	20.065	24.8576	21.8894	0	32.547	22.145	0	32.7016	0	20.0591	28.386	0	20.0586	16.1873	22.1989	22.8025	26.1986	25.6263	18.7196	23.5432	21.5053	21.8472	21.0696	25.2958	22.4244	18.9926	0
26.5291	0	0	0	0	28.6206	38.4117	33.0247	26.3748	27.2603	27.1275	0	23.4885	26.9486	28.3172	0	25.9435	26.1612	25.5881	28.7098	0	0	25.6213	0	24.9979	0	0	34.3229	25.9244	22.7825	34.8501	0	27.384	29.3804	0	0	21.8368	24.3432	23.5315	27.8057	26.7369	0	25.8628	0	23.3805	23.6501	0	0	0	0
24.7795	22.8223	21.4365	20.2601	21.9206	26.0821	35.5077	29.938	24.4017	24.8564	29.0567	24.7438	22.7307	25.4013	23.9339	23.1106	24.3008	23.4347	26.0793	26.6338	21.6279	22.6406	22.727	0	23.6064	23.0133	25.2248	31.3642	22.4601	0	32.0487	23.9467	0	26.9208	21.3683	21.3167	24.6438	22.4156	23.6208	26.2212	24.4237	22.0524	23.0367	21.7138	22.1951	23.4753	0	22.3563	19.4915	23.0231
21.9099	0	0	22.8848	0	24.8025	35.6972	28.5108	21.9938	23.4008	25.2447	0	23.6405	25.6869	24.56	22.4891	22.5454	22.2327	21.6047	28.5341	20.1689	22.5996	26.1872	20.9772	23.9689	20.6048	0	30.4637	20.4337	0	30.7211	0	20.5384	27.7217	0	20.5449	0	24.5391	21.2816	25.4473	26.3098	0	22.3002	20.9582	22.4614	0	0	21.4952	0	0
24.0442	0	0	0	24.5116	28.1205	36.1576	32.0918	25.4202	26.2776	27.1287	0	22.4226	27.7469	25.8032	0	24.5294	25.306	25.0132	26.7344	23.1375	0	24.545	0	24.1633	20.6636	0	33.7613	26.6289	23.6642	34.0971	0	21.7373	29.0557	0	0	17.8892	21.0129	23.8741	27.2528	24.9099	0	24.996	22.0008	23.2091	0	0	20.7518	0	0
22.4146	19.3462	0	0	0	23.281	36.5248	28.0473	22.0312	22.8215	25.3476	0	22.8917	26.485	21.6544	0	21.5938	0	19.3919	26.5166	18.8712	23.0253	23.9778	0	22.0301	0	24.5345	30.0409	20.6398	0	29.8133	0	19.4301	28.7026	0	21.4492	0	23.4597	21.7945	24.3483	26.0814	20.5885	24.3278	20.4701	20.7064	23.7208	0	22.7525	19.9638	20.7411
20.374	0	0	20.3635	0	28.5518	34.1743	33.162	25.4571	26.62	26.4764	0	22.9243	27.6687	25.874	0	25.0613	22.9298	25.1777	27.8108	21.6767	0	24.6748	0	23.7281	0	22.3321	33.9698	27.7974	23.1768	34.8833	19.1369	24.7827	28.5252	0	21.8254	18.7674	20.7506	22.7325	28.3744	23.5541	0	23.8767	21.5346	23.2993	22.4554	23.3083	22.2401	0	20.0486
23.2817	0	0	0	22.3485	27.0328	34.8739	31.398	24.4132	25.5835	27.0154	0	24.38	26.6004	25.7951	0	24.1515	23.9014	24.0906	26.2791	21.6982	21.7326	22.7238	0	22.2544	21.9706	0	32.6716	22.8728	0	33.0267	20.2587	21.3212	28.453	0	21.1728	18.2595	21.3649	24.1109	24.6939	24.9347	19.6603	22.8683	21.174	21.4916	22.2633	22.7335	21.4866	19.943	23.564
21.0143	17.5904	0	0	18.6191	26.644	33.3914	30.9345	24.5993	25.637	27.152	0	24.0529	28.9353	24.7671	0	24.4596	25.8674	24.0847	24.8148	22.8061	0	27.1453	0	22.404	21.485	0	32.2992	24.8029	21.6583	32.7679	0	18.0695	28.3782	0	18.8883	18.4012	0	24.1339	24.1039	22.2454	0	20.9716	22.2542	21.454	0	0	19.7764	20.3269	0
23.9067	0	0	0	20.681	25.8375	32.5165	31.3938	24.8474	25.009	29.784	0	22.5845	27.6469	23.5099	0	24.5882	22.9442	24.6604	26.5959	0	20.1817	22.6075	0	23.13	19.7281	21.0321	32.169	24.3069	21.8389	33.0141	0	21.1566	27.4292	0	0	16.043	0	22.8309	26.8441	21.1665	0	22.2346	21.9099	24.7693	0	22.7694	20.6298	0	0
21.72	22.1261	22.3034	22.294	21.3859	24.395	29.1447	29.5021	22.5227	24.7403	30.9335	0	23.7137	0	23.0997	23.3748	23.329	0	23.556	25.1669	0	24.2121	22.3664	23.5334	20.4211	24.2587	24.8855	30.5522	22.8737	21.3502	31.4333	22.9485	0	27.0181	18.7029	22.2185	20.7176	0	20.6718	23.848	0	21.1064	0	0	20.8543	25.1162	0	23.5913	19.5104	21.9397
23.5316	0	0	0	0	24.3761	35.3829	28.7942	24.7081	23.7037	28.3887	0	24.2053	27.2362	24.2949	22.0367	23.0045	22.0519	23.7668	27.1918	0	0	23.1833	0	22.9829	23.6284	24.0313	30.3625	22.9088	20.9242	31.021	21.0005	21.9772	28.0711	20.3931	22.0376	17.8196	20.5945	22.477	23.5195	27.8448	20.6087	23.5922	21.2862	0	25.3578	0	21.4991	19.6179	0
25.5371	23.1816	20.109	21.6038	24.6086	27.7308	36.8084	31.7627	25.567	25.8591	28.4049	23.632	22.5936	26.3903	26.8138	0	25.2692	24.8556	26.0023	28.3309	22.131	20.0863	24.1944	20.9842	24.4723	21.9598	23.1129	33.3842	25.9238	21.7155	33.6157	24.8701	22.7802	27.6081	19.464	21.9185	18.8998	22.3975	23.5821	26.275	25.0974	0	24.7938	22.2747	23.4611	25.7102	21.1902	0	0	0
22.0717	19.2299	0	19.7868	20.6114	27.5989	35.5272	32.0582	24.6473	25.7481	27.3862	0	23.0649	27.6041	27.2377	20.7788	24.2336	25.4791	24.2364	30.6031	23.0145	23.3047	25.7998	0	25.2581	0	21.6954	33.4532	25.0517	21.2239	33.6548	22.0973	25.7677	28.1343	0	19.6291	18.384	22.7346	22.647	27.8692	24.5136	19.1768	25.2049	22.3204	23.265	24.253	0	23.0416	0	21.3476
22.4714	0	0	0	24.4938	25.4762	36.2034	29.9369	23.0365	24.6009	26.5486	0	22.7389	27.7884	24.4659	0	23.9567	24.906	21.4612	26.1554	22.4236	22.7582	23.1638	0	22.5768	21.6672	21.7813	31.3272	23.0204	0	31.4993	0	29.2472	27.9893	0	21.2582	20.1246	21.2889	22.8885	24.0227	25.5891	22.2117	22.8018	22.4118	24.2427	26.4435	0	20.2735	19.1476	19.6392
24.9752	0	0	0	24.2339	26.5727	37.5569	30.8504	24.7936	25.9606	27.0137	0	23.595	27.635	26.8448	0	24.6712	25.6828	24.5282	27.5721	23.8873	22.1107	25.669	0	22.8566	22.0253	0	32.9047	22.0409	0	32.9918	0	22.7109	29.6088	0	20.1561	17.2988	22.9024	23.7358	28.5021	27.4871	0	23.4052	23.5734	24.5155	22.5142	21.5614	22.0165	0	20.5053
24.1132	22.227	23.5891	22.0866	0	27.199	33.2902	31.6926	24.4154	25.4732	30.4471	0	23.6725	26.3267	21.4773	24.0213	23.8351	20.4875	23.9225	27.3014	20.1531	23.6569	22.7044	24.6408	22.1603	24.0168	24.6704	32.7634	23.7584	19.5956	33.2241	20.6339	23.1124	27.8886	19.1191	22.8464	21.1041	20.5556	23.131	25.5529	24.5059	23.2534	23.5974	21.6155	22.9357	24.3953	20.6093	23.6657	19.9255	22.5976
20.7887	0	19.0772	0	20.9516	23.7698	36.9142	29.006	22.5768	23.4735	26.4038	0	23.1784	27.215	27.6862	0	21.5893	25.6678	28.2991	29.1648	23.4324	0	22.357	0	24.162	0	25.6645	30.3334	22.9275	19.3993	30.6499	0	26.4169	28.0086	0	21.3906	16.8829	24.8702	22.8212	26.1867	26.2926	20.1008	25.6277	22.7014	20.7198	21.5225	24.1502	22.0292	20.3768	19.7876
24.4181	23.3242	0	0	25.0588	27.2468	37.1233	31.2447	24.3255	25.3023	27.9342	0	23.7446	27.2246	25.669	0	24.2048	25.7582	24.5688	27.6568	23.9725	23.0699	25.4323	0	24.0157	22.1324	24.1928	32.4525	24.5975	22.8448	33.0663	0	25.3414	27.9395	0	21.5527	0	23.0034	24.3995	28.1459	27.0843	21.3489	24.3951	22.554	23.9466	23.6825	23.0133	21.948	0	19.8368
24.8052	0	0	0	23.5605	25.347	37.3213	30.1797	24.0448	24.8857	27.6055	0	23.2577	28.1009	26.7284	0	23.6369	23.8013	24.4056	27.9377	22.4192	22.8498	25.0004	0	23.5644	23.1319	0	31.5411	22.2139	19.2712	32.1908	0	21.3974	28.7675	0	20.0808	17.8332	22.0783	23.8214	28.1758	27.2362	18.133	22.9023	22.6011	23.9173	23.2138	23.3055	22.761	0	21.1014
23.8303	0	0	0	0	25.4845	34.1052	30.301	23.4299	24.9387	26.4076	0	23.0215	28.7439	25.0491	0	23.159	25.3178	22.6885	26.0443	23.3837	0	26.2634	0	23.0004	21.1295	0	32.0855	22.2265	0	32.0646	0	18.8028	28.6126	0	20.6807	16.395	22.3158	23.9143	0	22.4882	20.4297	21.9225	22.7717	0	20.3962	0	22.1366	20.4214	20.5227
27.6856	0	0	0	24.7591	28.8921	38.4306	33.3511	25.831	26.8845	26.8597	0	22.6292	27.4964	28.966	0	25.5544	25.7642	25.4597	29.0863	23.5321	0	26.0685	0	25.4412	23.3059	0	34.8718	26.1187	22.2713	34.9139	0	27.1748	29.2238	0	0	18.7107	24.8121	23.367	27.9332	27.01	0	26.2758	23.1023	24.0273	21.2101	0	20.0312	0	20.2343
21.157	20.4771	0	0	21.1248	26.0026	33.486	30.3692	23.5836	24.753	27.3118	0	23.6996	26.4065	26.154	0	23.3787	22.7996	23.9679	27.8651	21.1668	0	22.3122	25.9977	24.1129	0	25.6895	31.5316	23.5766	21.6261	32.1892	0	23.8845	27.5713	0	21.6783	0	24.5448	20.8592	29.5023	21.4619	21.5183	25.9172	21.5875	23.784	19.3296	18.6005	24.0752	0	19.7562
26.9433	0	0	0	23.582	25.4532	38.6776	30.4952	23.2481	25.3271	25.9729	0	23.8291	27.6965	27.6144	0	23.3657	25.543	22.3311	28.9357	23.1198	0	25.8725	0	25.0831	22.3418	0	31.5446	25.0517	22.634	32.1436	0	26.6856	29.8893	0	0	0	25.3852	23.4403	28.9972	28.6435	17.2873	25.6201	22.9513	24.5983	22.1373	21.2263	21.2489	0	20.9931
27.9443	0	0	0	22.8086	27.5938	36.9974	31.805	25.0459	26.2222	26.5765	0	23.0462	27.5892	27.3749	0	25.2064	24.9229	24.9971	28.2589	22.5319	21.5571	24.1431	0	25.3882	20.3757	0	33.2066	24.4194	21.9283	33.6873	0	25.7529	28.567	0	0	19.2876	24.3694	23.1357	27.7737	26.2262	0	25.5006	22.0388	22.7471	21.987	21.4454	21.6977	19.597	20.1964
18.4801	19.147	19.0473	0	21.0018	24.411	34.8976	28.5028	22.1983	22.7842	27.0911	0	23.3487	27.36	27.6872	0	21.307	0	23.0198	27.7339	20.8571	0	22.7117	0	23.3782	21.6498	26.4618	30.2242	21.0617	0	30.3421	0	25.024	28.2868	0	21.4094	17.186	24.4838	21.3828	25.7651	23.3662	19.293	23.2696	20.5285	19.1881	0	0	22.9384	19.8131	0
22.8828	0	0	22.7354	22.0309	25.1633	36.805	29.6177	22.1027	23.5242	25.9806	0	23.4056	29.0668	27.2411	0	22.74	25.2996	21.9618	26.2776	22.9902	0	26.2855	0	23.0124	21.1698	0	31.3734	22.42	0	31.5993	19.4833	25.1218	28.3561	0	21.0269	17.985	22.0848	23.1298	24.9097	25.6345	0	23.2972	22.3763	20.877	0	21.8107	21.9767	19.7171	19.1585
27.5965	20.3265	0	0	23.9241	27.5182	38.2287	31.9094	25.0759	25.8919	27.0393	0	23.8089	27.9535	28.0816	0	24.5072	24.6764	24.4394	31.4035	23.4402	20.8947	24.7669	0	24.7072	21.9741	19.6435	33.402	25.9637	21.8189	33.5983	0	25.8843	29.0679	0	0	18.7924	24.0597	24.3178	27.6851	26.9126	0	26.4848	23.4865	24.0761	21.0786	21.1205	20.9848	0	0
22.7524	21.7226	24.2291	22.3969	0	25.9953	33.2953	30.4355	24.4175	25.2307	28.3147	0	24.165	23.5799	28.4992	22.6282	23.4179	24.9031	23.3618	27.9974	21.1271	24.4176	22.9402	23.2773	24.0098	22.5165	19.5217	31.7302	22.2379	19.3328	32.1605	0	19.3786	25.6875	0	19.574	18.904	24.1537	22.9055	25.9274	25.4645	0	23.1441	21.6399	24.6294	23.8323	0	23.0227	0	23.0407
25.2047	19.934	19.6414	20.8298	19.7705	28.7815	34.7839	32.7311	25.8534	26.9459	26.9665	0	23.2253	28.4173	25.319	22.1833	25.5111	25.116	25.3483	30.3133	22.293	18.9134	24.7438	0	21.8008	20.67	19.5786	34.2106	25.0189	22.4344	34.6482	0	19.6582	27.6506	0	19.9811	17.4632	21.4732	22.4991	23.4619	23.7336	21.5261	0	22.0823	20.7961	24.4784	0	21.4259	19.9608	20.0708
22.7486	22.7326	22.5887	22.9118	20.8331	26.3	32.5714	30.9843	24.1951	24.7483	30.3839	21.6837	23.4635	23.8697	22.0648	24.0383	23.2657	21.4085	24.522	25.8175	21.4357	24.4103	22.7277	23.5306	22.3734	23.6442	23.5089	32.2237	24.4839	23.4551	32.8296	20.2728	0	26.6132	22.3469	21.8158	20.9796	19.1664	21.8988	23.3026	22.0239	22.1333	20.6752	20.5376	0	26.7439	0	24.0872	19.7627	22.5038
24.5855	0	0	0	21.1989	25.7001	38.2889	29.6897	22.1703	23.954	26.7615	0	22.8155	28.7808	26.5362	0	22.4143	24.5473	0	27.4748	22.9852	22.8056	25.8458	0	23.496	22.0169	0	31.4219	23.4956	22.569	31.2901	0	22.5594	29.2687	19.3345	0	17.8168	23.6565	22.6865	28.1953	26.5245	18.5106	24.4214	22.5408	24.4307	23.9437	18.6423	20.8448	0	18.7804
25.4592	20.2079	0	16.2835	24.7352	27.763	37.7899	32.8192	25.2022	26.2682	27.1236	0	23.4017	27.9192	27.8673	0	24.9724	25.4473	24.7332	27.6495	23.6717	21.2448	25.6771	0	23.7336	21.4343	0	34.2854	26.1628	23.5197	34.5394	0	26.0009	29.5538	0	19.1807	0	24.3401	23.5778	27.5983	25.6929	0	25.204	22.637	23.9031	20.9254	20.119	21.5791	0	20.4631
27.4714	0	18.0695	0	24.6508	28.477	38.2581	32.9259	25.2164	26.6558	26.8853	0	22.819	28.4312	28.9736	0	24.9611	25.5643	24.8658	28.1771	23.4323	0	26.2544	0	24.9608	21.4003	0	34.4811	26.6203	21.9838	34.3755	0	28.1552	29.9465	0	0	17.3788	24.3927	23.8119	28.2196	26.5292	0	25.6312	23.1905	24.6232	19.9589	22.2295	22.343	0	20.6089
23.5684	22.0463	22.5962	21.8542	22.8551	25.6197	34.6119	29.8864	22.8465	24.1216	30.0486	0	23.6548	23.8516	23.8763	22.1344	22.7177	22.8323	22.7382	27.486	21.0922	24.8632	24.8139	26.0985	22.5501	23.4407	21.6407	31.6701	22.196	0	31.6654	16.9539	25.7543	27.7125	17.7176	22.7117	19.7109	21.9378	21.2121	24.6403	24.0882	21.4872	22.2885	21.8222	21.3408	0	0	24.2695	19.557	21.6455
23.4416	0	0	0	0	27.1774	38.5973	31.0198	23.9324	25.327	26.0915	0	23.4123	29.1831	27.1609	0	23.6574	25.6637	23.1766	27.9374	18.9438	0	26.4301	0	23.9469	0	0	32.8438	23.1607	0	33.0927	0	26.6025	29.0629	0	0	0	23.3543	22.9643	26.3634	27.8996	0	24.967	22.317	21.8635	24.2495	22.8718	21.6321	20.239	0
24.7875	0	0	0	23.9012	27.2736	37.528	31.9394	24.7138	25.2112	26.8678	0	23.01	27.14	26.7596	0	24.2153	25.3745	24.3191	27.4712	23.5451	22.1816	25.6784	0	23.5959	21.5427	0	33.1287	23.4172	20.0551	33.5793	0	22.334	29.0066	0	0	17.9587	23.439	23.8659	28.2427	27.1391	0	22.1548	22.6228	24.6249	21.9727	20.5746	22.1122	0	19.9982
27.3829	0	0	0	23.7625	27.812	38.7219	32.046	26.1767	25.8906	26.0927	23.7751	23.5939	27.4302	28.1433	0	25.3758	26.0018	25.5882	29.9599	24.3244	0	25.9762	0	25.2432	22.3075	0	33.6061	22.883	0	33.761	0	27.7706	28.7989	0	0	0	25.0265	24.0214	26.0724	27.7114	0	25.9365	22.649	24.4422	22.5104	21.3644	0	0	0
21.4606	0	21.0626	0	19.8723	25.8568	34.3074	30.9174	23.293	24.4929	27.6407	0	22.4821	28.0267	26.7445	0	23.1366	22.3078	22.485	27.76	22.0109	20.9135	24.9823	0	23.1109	0	23.6272	32.2965	23.3564	21.5928	32.4908	0	23.8443	28.0129	0	21.0301	18.8893	21.2581	22.1658	29.7679	22.4243	20.37	22.8038	21.8696	24.1837	23.4084	22.5613	22.868	19.3605	18.6031
23.609	21.6321	23.2102	22.8863	24.4673	24.3228	31.9367	28.9294	23.4273	22.8311	33.674	20.8462	23.4681	22.6443	21.6925	23.7275	0	19.3358	24.0168	26.8847	22.5288	25.9162	22.6489	27.0208	21.3366	24.3711	24.333	30.2437	22.1325	0	30.6603	22.5818	0	27.4985	18.9733	23.3666	19.0739	20.4317	23.5086	24.2678	22.396	20.9184	22.7129	0	0	24.8131	0	24.5904	19.3924	23.2201
29.2858	0	0	0	23.372	27.2042	38.1303	30.7154	23.4284	24.9663	26.4154	20.7395	22.8275	26.9642	28.913	0	24.3199	25.5712	22.6318	32.984	22.5093	21.3275	23.6223	22.6875	26.2324	22.0867	0	32.5293	25.2737	0	32.6972	18.3255	26.0573	28.9737	20.9159	20.1431	18.7508	25.02	24.512	26.4604	28.2989	0	27.0202	22.3101	23.0468	22.152	21.6922	22.2602	0	19.4214
23.3855	0	0	0	23.793	28.5046	36.3482	32.5547	25.2828	26.7674	26.8467	0	23.559	28.6041	25.7321	0	25.3095	24.7599	25.1231	27.0584	23.3411	23.0419	25.8981	0	24.2503	20.3366	0	34.164	26.3514	25.4622	34.5081	0	21.8869	29.4217	0	0	18.3704	23.2799	23.5189	27.2559	26.3568	0	24.9478	22.415	23.7205	22.6901	0	20.6855	0	0
22.7369	0	0	0	0	23.636	32.0562	28.6935	22.5759	23.9209	27.0167	0	23.1252	26.0785	26.4299	0	0	24.7894	20.6455	27.9361	21.4409	0	25.7811	0	23.589	21.3541	0	30.5545	22.2533	0	30.8822	0	0	29.2004	0	20.0674	17.663	0	22.9797	25.5584	21.0837	19.9214	0	22.0212	21.6822	0	22.8477	22.7399	19.9813	0
21.5457	20.3754	22.1391	0	19.7601	25.4146	34.4368	29.5884	22.4	23.6747	27.1068	0	22.9481	27.335	26.1984	0	22.3648	24.9677	22.9871	26.8342	23.3165	20.4472	24.6984	0	22.4519	0	24.5146	31.3468	25.8799	24.0189	31.4604	0	21.9832	28.4674	0	20.7213	17.4587	20.8349	23.6088	27.9824	22.5689	21.0915	21.9352	21.9681	22.837	24.5194	20.6245	22.7498	15.7579	17.9616
22.3561	22.8642	22.4507	21.8337	0	26.7073	33.6401	31.4248	24.4774	25.5965	28.5328	0	23.4428	28.1153	26.0155	24.579	24.1229	25.377	23.73	26.5651	23.2251	24.0542	25.8421	23.703	22.0018	24.2147	24.2533	32.4243	23.4184	21.9464	33.2656	0	22.6819	27.3093	18.2673	21.6166	18.3155	21.7224	23.0512	28.7803	20.7461	20.5443	21.7558	22.8969	24.0084	23.774	23.0987	24.6236	19.1619	22.922
26.0607	0	0	21.2853	22.9953	28.6051	36.1492	32.7828	25.7727	26.8473	28.2598	24.4352	23.4899	27.4526	26.8852	0	25.8764	24.0925	25.6096	27.8427	23.0725	22.3621	24.6367	0	23.8285	21.2938	0	33.992	24.9521	23.2056	34.875	20.013	24.1304	28.6248	0	17.3168	0	22.4084	23.8677	27.5198	25.7013	20.1876	23.8262	22.6792	24.0429	0	20.9603	21.4547	19.6028	0
28.1825	0	22.8224	0	23.6925	27.5785	38.1462	31.5956	24.651	25.9914	26.7635	0	23.0835	27.8639	28.5162	0	24.2651	25.3965	24.8915	28.9533	22.6797	0	25.2747	23.9625	25.4447	21.3208	0	33.0085	23.5494	20.7491	33.2956	0	27.5217	28.7149	0	0	0	24.5855	23.577	28.2889	27.3999	0	25.5275	22.0143	24.4497	21.8443	0	22.6588	0	0
26.5038	0	0	17.2361	19.5812	26.3197	35.8641	30.923	24.0604	24.6675	26.8136	0	22.3662	27.1991	24.979	21.5553	22.7661	25.4984	24.0164	29.627	21.8069	24.7053	26.2211	0	25.6484	21.0969	0	32.1748	23.7031	0	32.7027	0	20.8454	27.7357	0	20.4223	17.3585	23.7623	22.0509	26.7378	25.3831	19.8797	23.0051	20.8018	22.0548	0	0	21.9347	20.3431	19.0587
0	0	0	0	0	29.8447	34.4303	34.321	27.8475	29.3717	27.8377	0	23.3825	25.4757	25.837	0	27.1783	23.5896	27.2158	30.7546	21.6803	24.181	24.6527	0	23.3313	0	19.8068	35.4831	25.9931	23.82	36.1732	0	22.2277	27.775	0	0	0	21.3346	23.3314	26.9605	25.9843	19.8191	24.3232	22.2717	22.8802	23.3249	22.5202	22.9021	0	20.9603
24.6969	0	0	22.7302	0	25.0132	36.8252	29.4474	21.9493	23.6183	25.9597	23.4476	23.4282	26.6738	23.9905	21.9134	22.2663	23.8219	0	28.3983	20.6287	21.9631	21.1702	0	22.776	0	24.1451	30.8184	22.1227	0	31.2737	0	0	27.9133	19.6857	23.268	19.5015	23.2809	22.3189	25.2524	25.9855	22.046	22.3138	21.092	0	26.6108	22.6363	21.8132	0	0
24.2474	19.7696	0	0	20.4116	22.6842	34.9632	27.5345	0	21.7614	25.5159	0	22.7065	27.08	24.4468	0	20.3428	21.9983	20.1749	26.3273	18.8231	20.8219	23.1389	0	22.9577	0	20.4247	29.4698	22.432	0	29.5034	0	21.228	28.1876	0	19.9316	16.2979	22.6871	20.7147	24.8325	23.7322	20.5574	22.6149	19.6851	20.2239	22.9794	0	21.8948	20.0442	19.1249
22.5523	22.7639	23.4676	22.6027	20.213	25.4706	29.9372	30.2561	22.6508	23.8887	31.1582	0	24.0992	0	21.6315	23.8276	22.5998	19.3286	22.3099	25.3831	0	25.4279	23.7409	23.5113	21.3222	24.5708	24.8056	31.1554	22.6662	20.27	31.7121	22.2038	0	26.8838	18.5879	22.7277	21.5653	19.3468	20.521	22.5293	19.4595	22.3545	18.6705	19.4522	0	25.0462	0	24.7561	19.4178	22.4468
27.2259	0	0	0	23.4944	27.2916	35.2612	31.6951	25.1152	25.9162	27.1649	26.565	23.3444	27.1974	25.613	0	24.7469	25.1818	24.8714	27.306	21.9859	22.156	24.0644	19.8005	24.6156	22.4667	0	32.8982	22.0374	0	33.3367	0	22.4223	28.1158	0	0	19.0298	21.6015	23.8384	27.6969	23.7672	19.4545	24.4755	22.7165	24.3192	21.1196	22.3339	21.3608	0	19.5296
26.9234	0	0	0	25.3342	27.8032	37.5751	32.2996	25.3873	26.7607	27.2045	21.0771	24.0595	28.5937	27.636	0	25.2849	24.1581	24.8511	29.5203	24.115	22.1784	25.2117	0	24.4972	21.0681	0	33.323	25.1866	23.0367	33.7174	18.5778	25.3758	29.2312	20.2575	20.3027	0	22.9867	24.1678	27.3338	28.0625	17.4942	25.856	23.5598	24.2218	22.2776	17.951	22.6753	18.8707	19.9687
25.2624	21.2742	0	0	22.0026	24.2473	37.5633	28.4801	21.9522	23.3305	26.1734	0	22.9947	27.158	26.9898	0	22.4047	24.3873	20.405	31.5149	22.3601	0	24.0346	0	25.8052	0	0	30.3955	22.4733	0	30.4601	0	26.2995	26.7933	0	0	0	25.5127	22.3622	26.9235	28.3861	0	25.397	21.4552	23.5317	21.357	0	20.4257	0	0
25.0609	19.9678	0	0	0	24.3243	35.0509	28.637	23.0463	22.9473	25.5538	0	22.8393	24.0014	24.8805	0	21.9357	0	21.9066	26.5202	0	21.9052	23.1596	21.1397	22.5169	0	23.4548	30.1747	24.6692	21.4639	30.2546	0	0	26.415	0	21.8554	18.1388	21.7965	21.5656	23.1341	24.2375	20.7504	20.1589	20.3714	0	24.8616	23.4428	22.1752	19.879	19.322
27.0247	20.4387	0	0	23.9149	27.8112	37.1691	32.9458	25.6293	26.8516	26.7883	21.9551	23.5782	27.9089	27.6412	19.5773	25.2064	25.9541	25.1403	27.1038	23.7141	19.9505	25.0895	0	24.2876	21.5556	0	34.2925	26.8755	22.6413	34.386	0	24.5085	29.4247	0	20.0326	17.0812	22.8376	24.4797	28.4618	24.734	0	25.6881	22.7519	24.335	26.1929	21.9226	22.0717	0	20.9495
24.7367	22.1216	21.2624	19.0351	20.2292	24.2475	34.9657	28.667	20.7376	22.7742	28.626	0	23.7924	22.8755	25.0919	22.3684	21.9189	20.1257	23.3614	26.9774	19.9672	25.7149	0	22.2905	23.2238	23.2029	24.2958	30.8941	18.3803	0	30.8305	22.5821	0	27.8105	0	22.5532	23.3879	23.1541	22.4591	21.474	24.4056	22.3312	21.2824	21.2818	21.9087	26.718	0	22.7822	19.074	21.5845
24.6623	0	0	0	21.8951	27.0309	37.2219	31.6288	24.3279	25.5572	26.2815	0	23.512	28.5526	26.772	0	24.5773	25.3726	23.3095	27.4725	22.1921	21.019	24.3356	0	23.6641	21.8154	20.2573	33.5083	25.9147	21.3445	33.457	0	25.299	29.4299	0	19.4672	17.9628	22.8367	23.0238	27.3658	26.6066	0	24.5936	21.9213	23.3984	23.2791	21.0456	21.1815	0	0
25.2641	19.6258	0	0	22.1004	28.6731	36.3672	32.7173	25.2867	26.3488	27.8414	0	23.7579	28.503	27.0527	0	24.789	24.5681	24.5165	27.9936	22.7827	20.3284	26.0043	0	23.851	23.1436	0	34.099	24.3863	22.2107	34.4835	22.1393	23.0759	27.9953	22.1086	19.3243	18.7388	21.9478	23.8671	24.5229	25.3054	18.6689	22.7363	22.2398	20.4225	0	0	21.1107	19.5287	19.1246
25.6677	21.6032	22.2149	22.1483	21.9799	26.2037	36.5485	30.2476	23.3227	24.2207	29.2273	0	24.0931	26.2636	27.9607	23.077	22.621	24.4914	22.9602	28.28	21.508	22.4138	24.7631	22.6166	23.5696	23.1491	23.8082	31.8111	25.1477	24.0539	31.8647	22.6298	24.8949	28.1214	0	21.6901	19.4303	22.1651	23.1376	27.2595	25.4677	0	24.497	21.2614	23.9686	23.9202	0	22.1611	19.1713	21.4416
26.8789	19.9405	0	0	23.9131	28.0223	36.7541	32.8298	25.5708	26.1145	26.8455	21.8678	23.4867	27.5742	27.5665	0	25.4746	25.4863	25.1444	29.0027	23.8262	22.2621	24.7453	0	24.191	21.8931	0	34.2655	24.6441	20.6926	34.7897	19.6391	26.4363	28.9683	0	18.3694	18.2974	23.9138	24.1261	26.738	26.2927	0	25.0598	22.6863	22.5935	20.9835	20.6559	22.006	19.8156	19.5287
23.8509	20.8938	0	0	24.1462	26.0486	39.1388	30.4468	24.2842	24.9212	27.5123	24.1418	23.4173	27.6389	28.8623	0	23.862	25.5952	23.2198	27.6974	23.6616	0	26.0674	0	23.2404	21.3004	0	31.9236	24.9847	22.3205	32.2455	0	25.461	28.8841	0	0	0	24.1468	23.4802	26.0746	28.1653	18.3917	24.7168	21.9277	22.1566	21.5769	0	19.5149	0	18.6148
27.6424	0	19.4331	0	23.9583	26.4153	38.2074	31.4556	25.0175	25.5712	26.4284	24.6227	24.4818	27.8423	27.5815	0	24.3175	24.8585	24.6389	28.5606	24.086	0	25.3207	0	25.293	21.73	0	33.0578	24.1941	23.2604	33.3892	18.6145	25.8197	29.1814	0	0	16.4258	23.6391	23.6304	27.0493	27.5537	0	25.4402	22.2622	23.6401	22.6407	21.9972	21.5869	0	20.6738
19.7255	19.9178	0	0	22.4464	24.1643	34.2401	28.4568	21.8534	23.4376	26.1501	0	22.8328	27.2006	24.6018	0	21.0801	22.9763	0	28.1713	20.9431	19.7213	21.9665	0	22.34	21.2414	0	30.2791	21.1172	0	30.1654	0	22.4435	26.9469	0	20.3513	18.89	23.2328	21.0803	26.2822	22.7555	0	20.7586	21.9089	21.3594	0	23.7986	20.5035	18.7579	0
21.4759	0	0	0	17.2997	25.269	31.1933	29.5808	22.1495	23.8299	27.5513	0	22.6292	23.104	22.8033	21.1694	22.0141	24.9324	23.0074	25.5131	21.2405	20.9755	22.2076	22.3427	20.9806	21.5383	0	31.0669	23.5811	20.6972	30.9376	0	18.3797	26.1206	21.2601	20.7	17.5234	21.2089	21.4888	24.3126	19.6694	0	0	20.1542	0	0	0	21.6222	19.8538	18.2279
24.9512	20.0129	19.7244	17.457	21.6558	25.6735	35.5802	30.4779	23.7476	24.4074	26.4601	20.8338	23.4387	26.7788	25.2876	0	23.353	21.8161	23.4509	26.8644	22.372	20.0308	22.0596	19.4015	22.4113	21.9617	24.11	31.6145	23.2821	0	32.161	21.2729	19.2935	27.6864	0	21.3553	21.8243	22.4778	22.3416	23.8822	24.2098	22.0285	20.6578	21.5718	21.0434	23.2396	0	22.1537	18.9495	20.6858
25.8079	20.7388	20.8041	19.9364	23.3207	25.7379	36.3408	30.2495	23.14	23.9029	29.3152	0	23.5999	25.0522	26.7856	21.9752	22.8513	23.0719	22.413	29.9706	21.5523	23.7532	22.7811	22.1999	24.0053	23.0522	23.4012	31.5387	24.0579	19.9112	31.8033	26.6237	27.0133	28.1252	19.2147	21.5923	17.728	22.6598	23.4487	25.3179	24.6563	19.9959	24.8188	21.194	22.1847	22.2543	0	22.6733	20.1495	21.2947
24.4728	0	0	21.2084	21.1263	27.8432	35.7399	32.5309	25.4708	26.517	28.8963	0	23.6085	26.3181	26.1082	0	25.2074	24.4536	25.2251	27.6549	21.7333	21.9739	24.5851	22.4367	23.3082	23.6705	0	33.7559	23.4546	0	34.1423	24.9024	22.9266	27.2541	0	0	18.6528	23.2958	21.567	26.8912	26.8393	0	25.2367	20.9861	23.6545	20.5177	23.1207	20.6545	0	0
25.3412	0	0	21.0303	19.9641	25.7688	36.0225	29.5087	21.9558	22.3919	28.4228	22.7338	23.3117	26.6101	27.0463	21.2406	21.9812	24.2537	22.6187	27.9386	20.6175	22.8125	26.2715	23.6737	23.4359	20.961	0	31.6203	21.8856	0	31.4451	19.4838	27.3683	28.0132	21.4201	20.9046	19.5042	21.9926	21.3232	24.9088	24.699	0	24.3576	20.3399	21.8271	24.2672	0	21.722	0	20.4212
24.7957	0	0	16.2956	22.9681	26.4347	35.2651	31.1797	24.4112	25.3335	26.0981	0	24.2529	26.6323	26.2873	0	24.1563	22.6852	24.1957	27.1471	22.4965	19.7881	22.9782	0	22.4876	22.1469	20.7005	32.5361	23.4806	0	32.8694	0	22.4026	27.9506	0	18.5073	17.5352	21.1044	21.7785	25.2598	24.5763	0	23.595	21.1564	21.3384	22.0935	0	20.7143	19.3078	0
22.7114	0	0	0	0	24.9648	27.1744	29.374	22.0909	23.3445	29.3431	0	22.7015	27.4104	26.064	0	22.0976	21.4819	22.8187	24.2144	0	22.8474	21.1304	0	20.2449	20.3129	0	30.6117	22.4407	21.3018	31.0153	0	0	25.6006	0	19.5528	16.9613	18.1828	20.7041	23.4164	0	19.8352	0	20.9015	21.92	0	0	20.9402	0	0
22.9092	20.6653	21.3674	0	22.1296	27.8576	37.3549	31.9344	24.8391	26.1801	27.3296	0	22.9125	26.9785	26.7581	0	24.4955	24.8864	24.7264	29.9365	23.4684	20.8615	22.7641	0	24.227	21.2507	24.791	33.2278	27.0738	26.2174	33.6108	20.7279	28.7028	28.35	0	21.8106	0	24.5322	23.8093	26.7157	26.2262	20.9376	26.2246	22.6896	23.516	0	0	23.6629	0	20.0308
24.5901	0	0	0	0	26.5714	37.7811	31.4607	24.3743	25.9488	27.3841	23.1962	22.6743	27.988	27.9242	0	23.9797	24.4987	23.9493	28.1652	0	0	23.6644	0	23.1652	19.9153	21.4974	32.9462	24.539	20.1371	33.4329	0	23.5923	28.67	0	21.2978	16.1202	23.8704	22.5227	25.0594	27.126	20.4533	25.5249	21.3118	0	25.2558	0	21.9688	19.0955	0
24.0195	0	0	0	0	27.955	35.486	32.6284	25.5538	27.0499	27.5169	0	22.6955	27.9433	25.5193	0	25.3012	25.1547	25.0575	26.4611	21.7032	22.519	21.7164	0	22.8465	19.9365	22.6237	34.2225	26.4868	23.1647	34.4905	0	20.6344	28.865	0	21.2136	20.1309	21.4526	22.4606	22.9823	24.0349	22.0058	23.0338	21.3943	0	25.4524	23.5878	22.1242	19.3234	19.9651
22.397	0	0	16.3594	19.2524	29.484	34.4383	33.6635	27.2382	28.6138	27.7172	0	24.1918	26.7379	26.9135	23.7163	26.8797	24.124	26.7766	26.5639	22.2262	23.2051	25.5599	0	22.8545	21.3972	21.333	34.9906	26.3333	22.433	35.7423	0	0	28.5519	0	18.3715	0	20.7277	21.9988	26.0508	23.5718	18.3632	22.2955	21.1526	22.5078	21.1631	0	22.5338	0	0
22.1649	0	0	0	0	27.8744	33.3458	33.2476	26.03	27.4289	27.5179	0	23.4962	27.9553	24.5703	0	26.0703	24.6091	25.2722	27.4862	22.7255	22.1361	23.8449	0	22.7957	20.6642	22.3578	34.6504	27.159	24.0198	35.0796	0	22.5561	28.3219	0	20.8454	18.3803	22.4032	22.3372	29.7092	23.7917	20.8315	22.6718	22.8429	25.0006	27.1789	23.5479	22.2883	19.6787	0
21.7715	20.2046	22.1454	0	0	25.7299	31.0253	29.8268	22.9783	24.0103	26.4001	0	22.5476	25.6785	25.7364	0	22.8446	19.9656	22.173	25.8303	18.094	22.5463	0	0	21.5649	0	0	31.1129	23.7425	19.9184	31.5699	0	18.6225	27.6497	0	19.4693	17.1647	22.0933	20.8613	26.4249	23.0167	0	20.8159	20.37	23.2378	0	0	21.8956	0	17.0084
24.2406	20.6345	21.9796	0	23.9759	26.2091	36.5707	32.7393	25.5911	26.53	28.853	28.6507	24.1138	25.2746	26.6375	0	25.4302	23.4386	25.214	27.8262	19.4015	20.8031	24.0773	0	21.7659	23.4968	0	33.8669	26.5516	23.1296	34.2318	22.9335	24.0506	27.4164	19.6843	18.6543	16.7899	22.3465	24.7037	24.968	25.0959	20.5821	23.9813	22.024	21.763	25.5344	21.7295	22.0954	0	20.5792
23.7826	17.8483	20.7913	0	19.0867	28.4404	32.6479	32.2127	25.0716	26.4752	27.4781	0	22.8685	27.8405	22.3285	0	24.6806	26.3186	24.6471	27.0459	22.4302	25.349	0	22.1483	23.1836	0	20.5871	33.5589	25.0342	21.0477	33.9457	0	20.1922	29.8479	21.8179	20.8188	17.3613	20.5895	22.263	27.2267	22.0695	20.0808	23.8198	21.9969	23.8924	25.1311	25.9935	22.4119	0	20.3045
22.768	0	0	0	21.083	27.3078	37.5493	31.6323	25.153	25.83	27.0448	0	23.6211	26.8176	26.0255	0	25.1915	25.2028	25.0276	27.189	22.5839	22.2134	23.9183	0	23.1878	21.3828	21.515	33.4831	26.0189	22.4131	33.8684	23.8167	21.488	28.0457	0	0	19.5557	22.8753	23.1236	25.5489	26.7524	0	24.9948	21.3131	21.7436	23.2437	22.2612	21.5305	0	0
20.7455	19.6032	21.5122	0	21.2967	30.4177	30.5111	34.4842	27.4223	28.4609	27.7265	0	23.303	29.3961	24.5399	0	27.074	23.9641	26.9975	25.8993	21.4219	0	23.2581	0	23.527	20.2196	0	35.4753	26.0245	20.5748	36.2991	0	21.6424	28.6321	0	20.6136	18.7547	0	23	22.5738	21.3058	20.4164	21.9021	20.4715	0	21.6451	0	22.4553	0	19.1636
23.5708	18.974	22.2433	0	22.1741	29.0102	38.5061	33.3645	26.3683	27.3193	27.6305	0	23.3045	27.8634	26.433	0	25.7633	25.2037	26.0977	27.0386	23.5166	0	26.3683	0	22.8607	0	0	34.1987	27.8019	26.7669	34.9843	0	23.4378	28.7819	0	20.2272	18.3246	22.645	23.1793	26.5981	26.5545	19.6196	23.755	21.598	23.3273	23.2166	23.6848	23.3274	0	20.5263
25.0506	0	0	0	20.7504	24.5801	38.3439	29.0632	22.6038	22.4196	26.823	0	22.1871	28.7056	28.2139	0	21.5018	24.5351	24.1197	27.61	22.5647	21.749	25.65	0	23.5262	21.3624	0	30.5769	21.648	0	30.8295	20.6193	23.3244	27.97	20.5203	19.1345	18.5025	24.0341	23.0458	26.5114	27.3448	18.6283	24.0194	21.9138	22.12	23.4035	25.8864	22.472	0	0
21.4707	0	0	0	0	27.2484	33.5957	31.7404	24.8266	25.9354	27.4	0	23.2652	28.7525	24.1073	0	24.4064	25.5731	23.9908	25.8732	24.0625	0	26.9765	0	22.6691	0	22.7693	32.8915	22.949	0	33.198	0	20.507	28.6345	0	19.0748	18.8388	19.7445	23.3309	26.0427	23.7514	0	22.7087	23.6765	22.4819	0	22.717	19.91	0	0
25.1805	0	0	17.9258	21.9302	30.0475	33.9421	35.2392	28.2077	29.2747	27.3115	0	23.6214	25.85	26.4779	0	27.157	23.9299	27.4832	27.4257	21.6618	24.1646	19.9689	0	22.6111	0	24.1427	36.4308	27.3239	24.492	37.0004	0	21.5062	28.4845	21.5727	21.2523	19.8518	21.9583	22.8397	24.2709	22.4982	21.7641	22.9117	22.5386	0	25.7596	0	23.2235	0	20.8636
23.0227	0	0	0	21.4409	27.162	36.4309	32.1955	25.1875	25.7921	27.8722	21.2147	24.0342	28.2164	25.546	0	24.3866	23.7776	24.3878	25.7356	21.3985	20.4057	25.2659	0	22.9709	20.3279	0	32.9672	26.0248	22.53	33.6866	0	19.4069	28.523	21.725	21.3912	18.347	21.2173	23.5882	25.9845	25.4601	0	22.397	21.3423	22.182	0	21.3354	22.0261	0	18.0323
26.9936	0	0	19.5958	0	25.1035	36.7875	29.5188	22.1476	23.8669	26.4807	0	23.4275	26.7617	27.8296	0	24.9785	23.9336	27.4367	30.6792	22.5246	22.4095	23.916	21.671	24.3625	20.0558	0	31.3523	21.7543	21.1037	31.7681	18.313	24.1416	27.0524	0	0	17.2622	23.9468	23.0165	24.5401	27.1676	0	23.8321	21.3641	20.8539	0	0	21.6722	0	0
24.1975	20.7073	0	21.1903	0	30.6232	33.9383	34.9452	27.9449	28.784	28.7013	0	23.7281	27.6852	25.3389	0	27.4038	24.4751	27.6433	28.166	22.2634	0	23.1354	0	23.0297	19.6881	0	36.2221	28.7507	24.4901	36.7737	21.5741	23.8077	28.5277	0	0	17.2258	21.0137	22.1747	27.5554	26.102	0	22.3348	21.8932	23.2727	23.2068	0	21.8777	20.2393	19.7664
24.2703	0	0	0	0	24.0326	34.5712	28.5617	24.9599	23.7759	25.565	21.4189	23.4157	28.8469	25.1187	0	22.0357	21.6983	22.7442	25.8126	20.0562	0	28.5918	0	24.0553	0	0	30.0754	20.5815	0	30.3374	0	20.9578	28.3327	0	19.5326	17.924	21.0582	21.1346	25.1781	23.4225	0	21.2024	20.72	21.5418	0	0	21.5566	19.6663	0
26.1027	0	18.2893	16.3044	24.396	27.8442	37.5049	32.1267	25.1604	25.9159	27.0198	0	23.0861	27.5864	27.8331	0	24.9017	25.1664	24.8389	28.5185	22.408	22.4983	25.0414	0	23.2277	21.5924	20.1535	33.8126	22.3676	0	33.8054	21.6492	25.7502	28.4109	0	19.4076	20.151	23.6296	23.0635	28.7784	25.5054	17.962	24.5741	22.1352	24.9956	21.5401	22.2496	23.0863	0	20.8709
25.4951	0	0	16.7224	0	24.4897	36.4157	29.0301	23.8428	23.0851	25.0085	0	22.493	27.8993	26.857	0	22.1866	23.3542	22.4159	28.1621	20.9751	20.4153	25.2367	21.6996	23.6257	0	0	30.6331	20.8795	0	30.879	0	21.7226	28.1557	20.4226	19.8159	0	22.6297	22.4781	26.0665	25.0756	0	23.9698	19.8072	21.9252	25.3222	0	21.8057	0	0
24.6984	20.2135	20.1501	15.4829	0	23.9194	36.0854	28.5366	21.8294	22.0723	25.7402	0	22.2487	26.4775	25.511	20.6955	22.1472	20.3679	22.2815	26.8295	19.2926	21.7187	0	21.2055	23.5918	0	23.7212	29.8865	22.1934	0	30.0874	0	19.7502	28.7587	19.6823	22.2775	17.7502	23.4244	21.8987	23.9257	25.0231	21.4165	23.7752	20.9621	19.996	24.1173	0	22.4989	19.4426	20.9464
25.2497	19.9304	0	0	22.9951	25.9613	36.8683	30.5445	23.805	24.4353	26.5402	0	23.6799	28.2544	27.8171	0	23.24	25.6823	23.6125	26.9409	23.4929	20.1387	25.9794	0	23.6478	21.3217	20.7488	32.0904	21.301	0	32.3376	0	27.3632	29.3783	0	20.0782	17.2163	22.9189	23.2772	27.2195	26.5875	0	24.2928	22.1081	23.0233	20.0811	21.2054	20.5015	20.4025	0
20.7695	0	0	0	23.031	24.8811	33.9852	29.7073	22.4699	23.4043	25.8076	0	23.4096	25.3374	24.7143	20.3965	22.2297	22.5075	21.7723	27.932	19.5583	20.4151	22.0114	22.3203	22.3006	21.384	0	31.2021	24.6057	23.3383	31.0899	0	22.463	28.0938	0	20.8763	17.4642	23.1963	20.3748	23.5233	23.7192	17.8215	21.0608	20.4216	20.867	0	22.8846	21.3208	0	18.1722
26.456	19.2006	0	0	23.5809	28.7934	36.3862	33.0048	25.8972	27.0636	27.4364	0	23.0669	28.2006	26.1986	0	25.6371	25.4723	25.5075	27.5479	22.6577	22.0013	23.8137	0	24.2379	22.3064	21.7355	34.3865	26.4829	23.2557	34.8208	20.4587	24.673	28.8049	0	19.753	18.7343	22.2739	24.4375	26.0783	24.8962	19.7113	25.0031	22.8018	22.8751	22.5476	20.9864	21.5663	0	19.7615
28.6088	0	0	0	0	26.679	38.6401	31.2253	23.5565	25.6794	28.1501	0	22.6376	27.7453	28.2068	0	23.8308	22.7602	24.7373	30.5045	23.0043	0	25.3507	0	25.948	0	0	32.4615	23.345	22.2936	33.4403	0	25.4562	28.6341	21.3989	0	19.0299	25.4174	22.4415	26.4068	28.6151	0	26.5795	23.0255	24.4794	22.8176	0	21.1882	0	0
24.2525	19.5236	0	0	20.3966	27.1242	36.9226	31.6879	24.5253	25.5133	27.2832	0	23.8317	27.2999	26.4856	0	24.3534	24.3379	23.9116	26.5365	23.7337	0	25.8966	0	23.76	0	0	33.2055	22.8343	19.0168	33.4071	0	24.1198	28.9544	0	18.5012	18.1815	21.8579	23.3008	24.809	25.8094	0	22.2226	22.3834	20.9153	0	22.0799	20.406	20.067	20.8829
24.773	0	0	0	22.8742	27.0689	37.3106	31.9235	25.3581	26.4508	26.4343	0	22.744	27.043	27.7448	0	25.0783	24.3504	24.9668	26.7738	22.702	22.2269	26.0021	0	23.1827	0	0	32.6501	27.4884	26.4237	33.4778	20.5858	23.9372	28.4256	0	0	0	22.3541	23.597	28.1477	26.5983	0	22.2211	21.2944	23.0201	21.8429	22.3108	22.7231	0	20.5358
22.9016	22.0371	23.1049	21.9365	20.9818	24.3905	28.8285	29.1903	21.9614	23.5743	30.9423	0	24.2468	0	21.0941	24.2206	21.5596	0	22.3999	25.5266	0	24.8127	0	21.7515	21.1046	24.5397	23.8172	30.2802	22.7656	20.7135	31.3795	25.8783	19.4332	26.0132	0	22.3077	19.7864	18.3089	21.4963	23.3894	20.9674	21.943	0	20.1334	20.4031	22.5936	0	24.2879	19.1559	21.9202
25.6532	22.7335	22.568	22.3646	0	25.2452	34.8427	29.767	22.587	23.563	31.9656	0	24.3058	0	23.1252	24.0019	23.0995	23.2241	22.8446	27.8989	0	24.4681	21.9013	23.9677	22.5874	24.4717	25.3012	30.5741	23.0015	20.8065	31.3064	21.9641	19.6963	26.3347	0	23.0891	22.8378	23.298	22.1106	26.6745	25.758	21.7005	22.4607	21.1361	0	27.2573	0	23.3259	18.9207	21.8709
23.676	0	0	0	24.5726	27.7818	36.832	32.0698	25.1366	25.9785	26.7864	0	23.1694	26.0459	26.8368	0	25.2217	25.9335	24.9388	27.0627	22.7202	0	24.0871	0	23.298	21.6861	0	33.3623	23.8027	20.759	33.9983	0	23.2501	27.2012	0	17.8843	18.5939	23.0249	22.6756	27.5675	25.9149	0	23.3829	22.5438	24.1159	22.3355	24.1854	21.8214	0	0
21.9824	20.1526	0	22.8926	22.4137	26.8214	35.2709	31.292	24.095	25.2284	28.4372	0	23.5733	27.08	24.9654	0	23.8864	23.8205	24.4504	26.5504	23.4175	23.4551	23.9402	0	22.2937	24.6251	21.497	32.3425	26.1342	24.4436	32.9178	0	21.1142	28.2809	0	21.7361	18.3806	22.6218	23.4313	25.9392	26.3951	19.0176	23.4848	22.0749	22.9217	24.4777	21.3399	21.3766	0	21.1688
20.5948	22.2809	20.8082	18.8727	0	25.7301	34.1005	30.8407	23.9579	24.7311	31.3795	0	23.5914	23.8864	24.374	22.2048	23.4084	22.3324	23.293	25.8037	0	25.2007	25.744	21.165	22.2453	20.6005	23.5452	32.5971	23.673	20.1844	32.9164	0	0	26.4836	19.2307	22.8099	18.8203	21.7317	22.608	23.5992	24.7173	20.5426	21.244	21.1049	0	28.0409	0	22.9706	18.8016	20.9627
22.5069	0	0	18.9123	20.969	25.4837	37.4806	29.9826	24.7612	22.8343	27.8284	0	23.4053	28.3236	23.8195	0	23.5641	22.3606	24.2672	26.423	22.6824	22.0853	23.7335	0	23.6052	22.3269	0	31.0096	22.4018	22.2581	31.7212	0	23.4149	28.5698	20.9002	19.9567	0	22.2112	22.8508	27.7902	27.3454	0	22.3824	22.1511	23.8868	21.9434	20.9546	22.2999	0	20.3527
24.3395	0	0	0	22.942	25.987	38.3324	30.2745	23.5945	23.8842	25.9718	0	23.9577	27.8348	27.6511	0	24.8463	25.9924	24.1911	27.4048	24.4639	0	26.2157	0	23.9442	0	0	31.3278	24.4644	0	32.6318	0	26.6231	29.1158	0	0	18.6501	24.5945	23.3638	26.9015	27.6675	0	25.2558	21.4168	23.7344	0	0	0	0	0
28.54	18.3075	0	0	23.7813	27.975	37.337	32.61	25.2434	26.1324	26.9427	19.9397	23.3066	28.4377	27.6368	0	25.0484	25.1484	24.7673	29.1202	23.2354	23.132	25.5759	0	25.7488	21.4923	24.0546	34.2036	23.3464	0	34.1985	0	25.5608	28.7707	0	0	18.0502	24.0878	24.1993	27.801	26.7767	0	26.9384	22.8283	24.5888	21.0538	18.1069	21.7265	0	0
20.321	19.8587	0	0	0	24.5689	32.3119	28.9363	22.6182	22.8112	24.5893	18.2635	22.1418	24.4254	26.0012	20.8247	21.2348	23.7008	22.4678	23.9789	22.1931	21.1756	25.7079	0	21.7356	0	19.5703	30.3492	21.9304	0	30.5478	0	0	27.1701	0	20.746	17.6973	19.7189	21.2675	23.2793	21.2727	20.9018	0	21.3998	0	23.1533	0	20.2041	0	18.2173
22.1607	0	0	0	0	26.4924	35.0281	30.6619	23.6003	24.5509	28.0092	0	24.0252	28.4824	26.4527	0	23.3559	23.3004	22.9187	26.1873	22.8307	21.097	26.9615	0	23.0068	20.482	0	31.7968	22.7827	0	32.2468	0	20.1025	28.0617	0	20.5015	17.9979	22.4051	22.5405	23.889	23.3437	19.1883	22.5698	21.6961	20.1483	20.2412	0	21.3079	20.2304	18.3617
23.6225	0	0	19.615	22.1273	26.5625	36.8598	31.3033	23.8894	24.7481	26.107	0	23.6295	28.5115	26.2645	0	23.6394	24.2962	23.8888	27.2259	22.3888	20.8898	25.9466	0	22.7378	22.1517	20.8982	32.5544	23.1894	21.0603	32.9888	0	19.7297	28.7747	0	19.5117	18.4588	20.9248	23.7749	26.8856	25.1339	0	23.7673	21.1561	23.5516	23.7995	22.0716	22.4393	20.4321	0
25.1462	0	0	16.0255	0	27.6172	37.2469	31.9137	24.6027	25.8189	26.3827	0	23.0966	27.2845	26.7594	0	24.5218	23.0249	23.9743	28.9531	21.0593	23.7307	22.144	0	23.9083	20.2098	20.2507	33.2162	25.5761	22.3675	33.6193	0	21.2013	27.5242	0	20.5681	0	22.8597	21.8633	24.2885	26.047	20.5159	21.4826	21.7203	0	26.6869	21.2604	22.0274	0	20.3194
24.4196	19.2304	0	18.2427	21.9554	26.7738	34.7218	31.3978	24.4139	25.2721	28.06	0	23.714	24.2843	23.2982	0	24.244	23.0584	23.661	27.8044	23.2607	19.612	22.6583	20.4202	22.9535	21.466	25.8379	32.5888	24.3226	22.3567	33.123	0	19.9832	27.232	20.8684	22.6125	18.6051	21.4048	22.4901	24.2859	24.794	21.4128	23.8271	22.6056	0	27.2501	0	21.8222	19.6902	20.3189
26.715	20.8426	0	20.9806	24.4003	29.0163	36.4094	33.1448	26.4324	28.0267	28.1721	0	24.018	25.1686	26.7246	21.5503	26.3534	23.6811	25.8974	28.3319	21.6301	22.6345	23.1145	21.5246	23.6121	21.2524	20.3241	34.9879	26.2474	24.1141	35.5363	20.4338	21.4008	27.8471	0	21.4607	18.0333	23.7958	24.7286	24.8247	26.6335	19.4889	23.0721	22.0162	20.1388	23.764	0	22.1202	0	0
21.9326	22.8291	21.7407	21.6948	0	25.7446	33.908	30.4578	23.0145	24.5311	30.6636	0	23.1706	23.6081	20.5579	22.3552	22.9452	0	22.7985	27.1007	0	24.6304	22.0004	23.6099	22.249	23.2774	24.4994	31.5313	23.8706	22.7653	32.1369	0	0	27.5453	19.829	23.8581	0	21.6376	20.6306	24.228	23.9449	22.2586	21.994	20.3015	20.5123	22.4594	0	23.5034	20.4875	23.3129
25.6568	18.8921	20.9573	0	0	23.442	36.6547	28.0305	0	21.6543	25.0139	0	22.4186	28.4155	27.1428	0	21.6489	0	22.9076	25.6504	18.4052	23.5297	24.6302	24.0552	23.4659	0	19.5038	29.7721	20.4768	0	29.8514	0	23.3818	28.5725	0	19.968	16.0154	22.7333	21.2651	24.725	24.7695	20.7858	23.3128	20.511	20.4313	25.8347	0	22.6791	0	20.3001
0	19.1581	0	0	0	25.8719	36.2723	29.4832	22.3283	23.7657	26.1831	19.4574	22.8463	27.0943	26.1039	0	22.7519	25.7461	21.6533	28.3349	23.2898	0	23.0538	0	24.1243	0	25.951	31.3572	24.1514	22.3067	31.3735	21.2559	27.8169	28.9459	0	22.293	16.0374	23.9139	22.3287	25.8448	25.1187	21.8913	24.8776	21.1426	18.1437	26.2419	0	22.0305	0	0
22.7588	22.9121	0	19.1839	24.8083	27.1847	33.9191	30.9495	23.8161	24.0609	26.816	0	22.5055	27.2184	25.5042	0	24.1779	23.852	24.1914	26.3633	21.571	21.2319	25.3988	0	22.3558	20.9114	24.4812	32.0425	22.5481	0	32.3935	0	23.4666	28.2556	0	22.5761	20.7381	22.8253	23.0494	25.0747	23.8353	21.1416	24.8156	21.4465	24.6888	24.6169	0	20.6939	19.2026	0
23.9702	19.4272	19.4629	0	0	25.2908	34.4053	28.915	22.3029	23.0295	26.4326	21.3631	22.5907	26.5908	23.7708	0	21.5751	21.8431	21.7149	25.8384	20.3848	22.326	23.6322	0	22.5011	0	25.3447	30.8243	22.215	0	30.973	0	18.426	27.8512	20.3483	22.705	21.3182	20.5686	19.7865	21.6621	24.5738	21.7539	0	21.0172	23.1541	24.1989	0	21.3725	20.2026	0
20.4864	19.0107	0	0	0	24.5553	31.4249	28.5645	22.4119	23.6848	26.0431	0	22.7483	26.1155	25.1398	21.8965	21.8361	24.3982	21.8354	24.1492	20.9479	21.0635	22.7134	0	22.1217	20.0778	23.4778	30.0604	21.6169	19.0708	30.3393	0	0	27.2472	18.7691	21.251	18.5733	0	21.8367	21.5316	19.0517	20.7314	0	20.15	22.5214	0	0	21.2285	19.3356	0
28.8496	0	0	20.7111	23.7619	27.5394	37.8484	31.0699	22.7464	24.9151	27.1004	0	23.7255	28.2756	27.6878	0	23.6457	25.4552	23.7076	29.8991	23.5827	22.0196	24.8486	21.0418	26.4988	19.9143	0	32.9339	24.2111	0	33.2721	19.1642	27.3918	28.8599	0	0	0	25.0326	24.1449	27.3394	27.27	0	26.3234	22.3694	23.3951	22.1337	0	20.8254	20.0037	0
27.7454	18.0151	0	0	23.9083	27.6713	38.1054	31.7168	24.6412	25.1432	25.8706	24.367	23.7598	27.8316	28.2936	0	23.7432	25.9113	24.4327	28.7668	23.6144	20.6662	26.7125	0	25.1931	20.2469	0	33.163	23.6598	0	33.0796	0	26.8647	28.6511	0	0	18.989	23.5544	22.8739	27.8474	27.0977	0	26.056	22.5866	25.0557	21.3093	20.0086	21.8781	0	20.9342
22.3685	0	0	0	23.2497	26.7765	32.938	31.806	24.3991	24.9531	26.8171	0	23.0547	27.7383	24.9513	0	24.4233	24.7609	23.4479	25.582	22.3423	0	26.7655	0	22.5342	22.7266	0	32.763	23.1776	20.2553	33.4457	22.5966	21.7452	28.1041	0	20.5841	18.2657	19.5372	22.4196	26.2129	21.6315	0	0	20.9303	0	23.2309	0	21.9944	19.3986	0
22.757	0	0	0	19.5161	28.2061	34.279	31.9103	25.2147	25.9716	27.4274	0	22.6983	28.4689	25.124	0	25.1042	23.7148	24.5761	26.6292	22.7159	21.7867	24.6556	0	23.6338	20.9706	0	33.4223	25.9195	22.217	33.8891	20.3476	20.6391	27.985	0	20.7198	17.0925	21.7262	23.7864	25.6411	24.0721	19.9381	23.6507	21.4441	22.0211	0	0	21.1859	0	17.4642
21.5326	16.5137	0	0	0	23.5917	34.6888	28.6574	0	22.4903	25.1813	0	23.0062	24.7011	25.7383	0	22.2923	0	24.013	26.5359	0	18.2265	20.7386	0	22.4237	0	23.5765	29.319	22.4118	20.5463	30.2182	0	0	27.5326	0	21.9637	20.8387	22.3807	0	23.7376	22.7209	20.8457	20.5024	18.461	0	26.897	0	22.275	19.9803	19.3533
0	19.3502	20.8769	16.2561	0	25.326	28.0301	29.7707	22.9585	23.3559	26.2062	0	23.8966	26.3698	25.7393	22.0203	22.4819	22.9836	22.0779	25.2716	20.5179	0	25.4897	0	19.0104	20.7218	0	31.3539	23.0001	21.5662	31.1963	0	0	27.2599	0	19.6211	16.8495	17.9905	21.3798	22.9928	17.8779	0	0	20.4225	0	0	0	22.5816	18.6138	19.6364
26.4465	21.844	22.2904	20.519	22.809	24.9593	37.2936	30.063	23.8008	23.9779	27.8138	22.0871	23.6198	25.4559	26.5239	0	23.847	22.8844	22.3422	27.5412	22.9599	23.4865	24.6694	0	24.7277	22.7821	26.0553	31.025	23.8698	19.5852	31.5979	23.4705	28.5268	28.204	0	20.7912	20.9409	22.8369	23.1855	26.496	24.7221	0	24.1676	20.6321	22.885	26.9518	0	21.6174	0	22.1278
25.7012	0	0	17.254	21.5662	26.6122	36.7628	30.6406	23.0509	24.4855	26.04	0	23.1454	27.9435	27.4636	0	23.3293	24.8593	23.5811	28.0234	21.9563	0	24.8874	0	23.9943	22.1929	0	32.3233	21.8444	0	32.5313	19.346	23.4287	28.1747	0	0	18.0227	22.7545	23.6297	27.9773	25.9358	0	22.3146	22.0948	23.9005	0	21.6142	21.5169	19.2076	0
22.9467	21.6976	22.8216	20.4228	22.5567	26.6478	35.9575	31.3399	23.9383	25.3321	27.8661	0	24.5416	28.5315	26.295	23.9412	24.2525	26.1765	24.748	26.2122	23.1471	21.2159	26.0954	20.525	22.2438	21.882	22.1977	32.5084	23.2304	20.5943	33.0743	21.6064	21.0716	28.9744	0	21.1714	18.4551	21.4634	24.7765	24.9645	26.4323	19.6315	22.869	22.2307	21.0729	23.4516	24.5541	22.5086	0	21.1325
23.2018	22.754	22.4587	20.7735	20.6788	25.6057	31.8518	29.9252	23.0427	24.0804	30.4881	0	23.217	0	22.0573	24.978	23.0197	0	22.5273	25.7417	0	24.2608	20.3964	19.9328	22.3251	24.1843	24.1987	31.5286	23.5743	20.4235	31.888	0	0	27.0529	18.7478	21.7673	23.9051	0	20.5467	0	20.0377	22.2452	21.9267	21.6587	0	25.7951	0	23.9287	19.9488	22.849
25.742	19.8395	0	0	22.0485	27.2702	36.8576	31.9966	25.0791	25.805	26.0451	0	23.8795	26.6369	25.3218	0	24.6164	24.223	24.4668	30.3081	22.9226	21.6569	24.3732	20.6468	22.8208	21.7923	22.9531	33.3688	25.4537	22.8103	33.5518	21.5266	22.4199	27.885	0	21.7272	19.8166	22.475	23.4539	26.0338	25.3749	20.6265	23.8897	22.4126	22.7002	24.295	0	22.0327	19.4201	0
28.0298	0	0	19.0445	22.6856	27.8849	37.6833	32.5961	25.3841	26.0333	27.6894	24.1723	23.0864	27.4164	27.8275	0	25.1404	25.7124	25.0186	30.2915	22.9767	18.4017	25.8481	0	25.965	22.0614	0	33.8229	25.5463	21.8352	33.9892	0	25.9906	28.8269	18.4358	22.4847	18.4388	24.2965	24.1595	27.6924	28.6887	0	25.5037	23.4108	23.8883	22.1387	19.7386	21.3081	0	20.2745
22.5293	17.9284	0	0	0	27.207	33.2833	31.6909	24.8523	25.6573	27.666	0	23.882	28.7779	24.5417	0	24.4117	23.7128	24.1437	25.42	22.1346	21.0732	27.4551	0	22.7551	21.9723	0	32.6257	25.8168	21.5064	33.2329	0	20.8506	28.9439	0	19.4501	17.3428	19.3563	23.6908	24.7056	22.3312	0	21.2566	22.0703	20.4461	0	0	20.7251	0	0
24.197	20.2662	0	0	22.1881	27.0561	38.0176	31.3161	23.2711	24.4643	26.7429	0	22.3068	27.8762	28.2787	0	23.3127	25.6625	23.6621	28.4757	22.2284	0	24.823	0	24.3428	0	24.0907	32.7527	25.832	22.5391	32.8495	0	26.1975	29.0924	0	20.1612	20.4828	23.5831	23.359	27.4012	26.2477	19.0532	25.2242	22.9402	23.6884	22.886	21.6864	21.5345	0	0
0	0	20.5031	17.3995	0	25.914	33.2551	30.6269	24.1134	24.6883	27.7136	0	22.4562	27.1196	25.7065	22.8577	23.0411	23.0897	23.3082	29.3145	24.4724	26.0085	20.2392	24.1597	25.0407	21.6239	20.1974	32.1773	23.8457	21.1378	32.3649	0	19.2003	27.4987	0	18.9925	17.9714	22.8267	21.3785	26.8495	21.4076	21.4349	23.2404	20.0735	20.0152	22.6835	0	24.0155	19.0714	18.0653
26.0189	0	20.9737	20.0543	23.1854	26.3564	36.8516	30.6931	24.9771	24.473	26.2676	0	23.3712	25.6146	26.9558	20.5609	23.7063	23.5922	24.5159	29.1114	22.7581	24.9179	25.4776	0	23.6917	21.6959	0	32.3034	21.6439	0	32.5045	22.4106	23.614	27.7014	0	18.2915	17.8772	23.1947	23.0297	25.8996	26.0963	0	23.576	21.9794	21.5016	0	21.3983	22.066	0	0
25.8987	0	0	0	22.7325	28.3711	37.8541	33.1671	25.7697	27.3402	27.1523	24.1376	23.7044	27.994	26.8848	0	25.7538	24.809	25.2808	28.0621	23.0289	0	25.1451	0	23.7573	20.8061	0	34.4341	27.955	23.0118	34.9227	0	27.9642	29.2444	0	0	16.0299	23.7008	25.3642	28.4251	26.2176	0	24.9792	22.5039	24.4683	0	0	22.5947	0	0
20.4515	0	0	0	0	29.338	33.2934	34.182	27.0305	27.8909	27.3525	0	23.1829	27.7849	24.2983	20.5759	26.1413	25.1977	26.0395	24.8612	23.6149	0	27.0575	0	23.171	0	0	35.1283	26.889	24.8215	35.3991	0	20.7788	28.7225	0	19.6652	18.4203	0	23.4165	25.8194	21.1109	17.4499	0	23.0842	22.9286	19.874	20.9245	22.6628	0	0
25.072	0	0	0	23.2327	27.8447	37.8638	32.3458	25.3666	26.8101	26.4637	0	24.6686	27.9838	27.372	0	25.2857	25.1246	24.2685	28.3725	23.8903	18.9934	24.8527	0	22.6567	21.8093	0	33.2448	24.2489	0	33.8981	0	25.811	28.8269	0	0	18.2521	23.5841	22.5507	26.7731	26.2703	0	25.3125	22.5451	22.8056	21.0419	0	19.5507	0	20.6649
23.2032	20.4874	20.0479	18.6491	18.3707	28.398	35.9674	32.5663	25.1363	26.3336	27.9575	0	23.1878	23.8031	24.8894	20.3963	24.8971	21.8496	24.6406	28.3708	19.7223	22.956	0	0	22.1416	21.4264	24.604	34.1112	26.3442	22.1467	34.4787	20.9764	0	27.6922	0	22.4924	20.5768	20.5449	22.2628	22.1216	24.1268	20.9408	0	19.9522	20.5686	26.3942	0	22.394	19.9599	20.5249
22.0941	0	0	0	21.4729	25.3538	33.995	30.1883	23.1375	22.5844	25.7334	0	22.3698	24.6276	24.072	21.2886	21.783	23.6254	22.3275	25.0374	21.194	0	21.7086	0	22.5294	0	25.7551	31.2679	22.5508	18.8051	31.536	0	0	27.5339	0	21.6583	20.9691	20.1248	0	22.8502	22.8591	21.1834	19.9072	21.8423	0	24.3755	0	23.1663	0	19.0021
27.3116	19.6164	23.7613	0	24.238	28.001	37.0677	32.4859	25.9868	26.4981	27.2837	21.8589	23.7091	26.7804	27.6075	0	25.5658	25.2977	25.4094	29.8646	22.5945	22.3966	23.7737	20.247	24.3229	21.1815	0	34.4404	23.9137	22.7792	35.1911	0	25.3807	28.1414	0	18.8994	19.1892	23.075	23.2651	26.8301	25.9146	0	25.2784	22.0745	23.1124	22.797	21.1517	21.6707	0	20.4761
23.327	22.5011	21.2343	22.6575	0	24.8914	32.7546	29.6291	22.6152	23.8059	31.056	0	23.5167	21.3762	21.2887	24.0627	22.4138	0	21.6813	27.4569	0	24.9029	21.7508	25.0102	21.1638	24.3368	22.9371	31.0026	22.103	0	31.1387	20.1763	0	27.7978	0	23.3666	19.9074	21.1916	20.3982	22.5669	22.5182	22.7476	20.9378	18.9548	0	23.0258	23.5258	23.5822	0	22.2771
22.0977	22.6395	21.7781	22.2611	20.1657	26.3405	31.5309	30.5873	23.1965	24.466	30.547	0	23.3644	0	23.9794	23.6184	22.8635	0	22.8776	25.1251	0	24.7645	0	22.4938	20.7642	23.1076	24.5428	32.0734	23.0921	0	32.2718	23.2836	0	27.3306	0	23.1073	20.9975	16.8757	22.018	18.8591	20.583	20.7631	0	18.9388	0	25.6706	0	23.5693	20.4244	22.3012
28.2833	22.2631	22.1677	19.8944	21.4073	26.0149	37.1456	29.9506	22.826	24.7013	33.0844	0	23.4125	24.9571	23.7251	23.5395	22.5511	22.5114	22.455	28.4565	0	25.6784	21.7275	24.6246	25.0538	24.134	24.1628	31.7939	23.7169	19.0843	31.9518	26.2103	19.9278	27.5811	0	22.7464	21.4053	23.4085	22.9472	24.3209	25.8996	21.6761	23.3189	22.3315	22.0744	23.1276	24.9741	23.8508	0	22.6955
25.9343	19.7092	0	18.9973	24.3935	25.6764	36.019	29.8527	22.5071	23.8461	28.7033	22.8679	22.534	28.8996	27.4875	20.741	22.5028	22.6071	21.9564	28.329	23.4479	22.6347	26.4899	0	24.6699	21.4972	0	31.8089	24.5078	21.3778	32.0485	21.6561	24.1886	27.9444	0	19.5831	17.9791	22.3333	23.8819	26.4987	24.0422	18.3501	23.4191	22.9456	22.5756	23.373	0	21.226	0	17.5984
22.4767	22.6106	22.745	22.5694	0	26.2666	31.5882	31.1036	23.1064	24.7269	31.9648	0	23.9609	0	21.6403	24.0045	22.9051	22.3449	22.7991	26.8822	0	24.5914	23.2037	25.1837	22.0378	23.6818	24.5282	32.3626	24.1626	19.4812	32.5982	19.2315	21.52	27.3134	0	23.0696	21.1118	20.0635	21.2477	22.9895	20.8537	21.1616	0	19.573	19.6207	23.7344	0	23.7394	19.4818	22.3775
27.4923	0	0	0	0	25.4632	37.4032	30.0689	23.9958	24.0573	27.3005	0	22.6372	27.8967	27.0825	0	22.3377	25.6108	23.5949	29.2553	22.5987	23.1053	22.7203	22.3172	24.8687	0	20.7892	32.2694	21.4147	0	32.1656	0	23.4006	28.7374	0	21.0285	19.1722	23.0531	22.8651	24.799	26.2119	20.4955	24.6222	21.9719	20.4202	26.982	0	21.6292	0	20.5734
23.5626	22.6145	23.9737	22.7088	0	25.7418	31.1073	30.3418	23.19	24.4065	32.1923	0	23.1544	24.0967	21.4773	23.1215	22.9842	0	22.9986	27.0276	0	26.3952	0	25.0866	21.9212	23.6591	23.68	31.6546	21.7268	0	32.4516	19.275	0	27.4905	0	22.5256	21.1927	20.4289	22.8477	25.3741	21.047	21.7734	22.2102	20.1379	21.643	26.3988	0	25.268	19.6732	23.5247
21.3941	19.9877	20.5845	15.6666	0	25.7536	31.2946	30.2026	22.8798	24.1174	27.1645	0	22.8746	26.7604	23.9909	0	22.4752	23.2954	21.658	26.3018	20.1226	23.0624	0	0	21.4163	0	20.7563	31.7658	23.8761	22.2067	31.6192	0	0	26.9885	0	19.0606	17.1716	20.261	20.4075	26.8027	19.3036	19.8162	19.741	21.1866	22.2909	20.5345	24.0725	21.6219	18.1002	17.1968
25.2067	21.7835	0	0	0	27.2219	34.4162	31.8019	24.5125	25.5615	28.7864	0	22.7503	26.9243	24.7501	20.0882	24.3377	22.679	24.0791	29.0063	20.765	23.758	21.2376	19.6782	24.5445	20.7569	22.7901	33.3943	27.0916	22.9149	33.613	0	20.3963	26.999	23.4818	22.375	18.1757	22.0107	0	23.035	25.0546	21.1652	23.8569	21.2811	0	23.9735	0	20.8284	18.2673	0
23.2673	21.8571	21.0851	21.9778	22.971	27.8695	32.5024	32.5863	25.4313	26.5109	28.7121	31.2017	24.5817	23.8567	23.6653	23.4736	25.171	23.9066	24.8668	27.3373	21.0138	23.386	23.7572	0	22.7296	22.8314	21.8936	34.0202	24.8524	21.4335	34.5896	21.7912	0	27.4749	20.6804	22.2479	21.0964	19.5595	22.6086	24.0634	0	21.8276	23.0847	21.7592	22.6404	25.3817	20.4015	23.5793	19.258	21.6063
25.809	0	20.4927	0	24.15	26.8548	35.437	31.352	25.3523	25.1944	26.999	0	23.0944	26.2375	26.889	21.6164	24.858	24.9261	23.6208	29.5929	22.3922	21.1649	23.8185	20.1902	24.1211	22.0077	0	32.9216	26.4387	21.9268	33.2006	18.4781	21.5305	27.8894	21.7587	0	18.312	22.2059	23.0743	26.5686	26.8727	0	23.5673	22.2119	23.6628	0	0	21.3527	0	0
0	19.5605	22.3989	0	18.8328	25.3466	31.8094	30.0922	23.6128	24.149	24.7091	0	22.5139	24.1371	24.5863	21.2463	22.8228	22.0157	23.0598	26.8974	19.1562	0	22.9015	19.4773	20.9511	21.0851	0	31.1056	24.4798	22.3818	31.7559	0	0	26.1812	0	19.5806	16.8605	22.6995	0	23.8319	20.6886	18.5799	0	0	0	0	0	21.497	20.7304	19.5329
23.5199	21.4024	21.7022	18.8546	21.0581	26.2505	27.6535	29.8739	22.9521	23.7919	29.487	0	24.7367	22.0218	20.8453	22.5148	22.7747	21.0057	22.3664	25.9803	0	23.629	24.2993	19.3633	19.2086	24.7848	24.9066	31.4412	21.4792	0	31.6826	24.3003	0	26.2315	0	21.487	20.6696	0	22.3546	0	22.9319	20.7417	20.8557	22.1767	0	23.143	0	22.7788	19.2216	20.8102
25.7758	19.9853	0	18.6785	19.8565	25.0072	34.4489	29.4589	21.844	23.4374	26.0916	0	23.4102	27.5592	25.729	0	23.0875	25.8314	21.6224	25.4983	24.075	22.1257	22.6059	0	23.5948	0	23.6614	30.449	23.4568	22.3883	30.7463	18.0583	20.5741	28.3106	0	20.5812	18.6791	19.9755	21.5458	23.5625	24.2535	19.3331	23.742	22.6051	0	24.4306	0	23.4547	19.5599	22.4625
26.2677	0	0	0	23.6966	26.352	36.3545	30.7239	25.5308	25.0143	27.1345	0	23.5325	27.9623	25.8644	0	23.922	25.0779	24.9796	29.0849	22.9964	22.9837	25.2888	0	24.0621	21.9512	21.9542	32.4966	24.3723	0	32.5832	0	24.7635	28.7797	0	0	18.4114	23.281	23.9138	28.3811	25.873	0	25.3289	22.3401	24.4377	23.7933	24.5368	21.9325	19.6289	19.515
23.3855	0	0	16.9187	22.1726	24.9899	37.2888	29.479	23.3018	23.5117	26.7474	21.1356	23.2649	28.1947	26.2769	0	23.2594	23.8723	22.0203	28.3935	23.2091	21.4845	22.6724	0	23.401	21.5571	20.894	31.04	24.8246	23.9285	31.3465	22.0257	20.8589	28.8993	19.639	0	18.2472	22.6942	24.25	26.357	26.1676	0	24.3188	21.4845	22.5364	23.1345	19.7746	22.4375	18.8797	19.7743
23.7646	22.2515	23.1088	21.1739	19.2715	27.9752	33.5309	32.5658	25.5147	26.5568	30.5498	0	24.6066	23.2635	22.9014	23.5489	25.0232	19.8686	24.6489	26.4874	0	23.0881	21.7265	21.9352	20.6821	23.8546	25.0957	33.4078	25.1479	21.0408	33.6811	25.0547	0	27.4343	19.6361	21.68	19.695	20.152	21.7688	23.8159	22.2567	22.2975	0	21.0718	19.4754	19.5884	0	23.8054	20.2059	21.8438
29.0005	0	0	0	23.6342	27.942	36.7568	32.6312	25.5376	26.5616	26.7746	0	23.6402	27.3896	26.8502	0	25.073	26.2141	24.9237	29.9532	23.4725	0	25.832	0	25.059	22.0791	0	34.422	26.6269	24.6419	34.2792	0	26.0792	29.1302	0	19.2674	18.1658	24.9188	24.3225	26.7411	25.796	0	24.2224	23.1548	23.4491	22.13	0	21.967	0	19.2377
26.127	0	0	0	23.5959	27.5826	33.0133	32.8194	24.5952	24.8933	27.6083	0	23.4746	26.4039	25.8568	0	24.011	24.1854	24.2419	26.4379	22.722	0	24.1246	20.6288	24.0396	21.4555	0	34.0296	24.6001	0	34.1744	18.9281	24.3602	27.0378	0	0	0	0	0	25.4218	26.1638	0	24.1119	21.6769	22.3177	0	21.0785	0	0	0
24.0688	22.3175	22.2578	22.6421	21.4244	24.3007	30.6413	28.814	21.978	22.8675	32.0365	0	22.6609	0	23.2023	23.3507	21.6568	0	20.3735	26.9881	0	24.6292	21.8018	24.9387	21.2022	24.4877	24.2398	30.6088	22.4331	0	31.0002	24.8183	22.1784	26.3424	19.3007	22.7496	19.904	21.3509	23.3693	23.5787	25.3447	21.1688	22.1438	20.8112	21.9944	25.4723	0	24.1447	19.5659	21.7337
21.2587	0	0	0	21.057	25.8121	36.2755	29.9659	22.9234	24.1129	28.6375	0	22.6549	28.4824	24.9638	0	22.6382	23.0546	23.5583	26.5718	20.0447	19.8631	20.7045	24.1955	22.8886	0	21.7573	31.8176	21.7029	0	31.8353	0	20.279	28.9191	0	19.5439	17.9702	20.76	21.8861	29.5892	24.0468	0	22.5474	21.2678	25.6066	21.4715	23.5433	21.4743	0	0
27.7323	0	0	0	24.8627	26.4587	38.0708	30.4493	24.4239	25.173	25.7432	0	23.3663	26.661	28.8158	0	23.4314	26.9183	23.9275	30.5796	23.5119	22.8494	25.5022	0	25.4645	21.1081	0	32.6326	25.9541	24.8251	32.8495	19.3382	27.6798	29.5359	0	19.8143	19.9053	23.2961	24.2028	28.3015	26.1491	18.607	26.2148	22.5921	23.8404	21.2187	22.1797	22.3611	0	0
0	19.5663	0	0	0	24.3589	33.2916	28.2367	23.9584	22.3726	27.9256	0	23.7941	24.9203	24.287	0	22.8688	0	25.2949	26.2775	0	23.3383	22.9088	0	22.0326	0	27.3929	29.6628	22.9466	21.6501	30.0743	0	0	27.643	0	23.3148	18.2876	21.5164	21.4101	23.4517	22.6112	21.2612	23.9332	15.8841	0	25.2607	0	22.495	19.6225	20.7228
25.2255	0	0	0	23.8966	26.8455	36.7794	31.9951	25.6496	26.1935	27.341	20.307	24.0657	27.1879	27.841	0	25.471	25.6601	25.2288	27.2209	23.3464	21.4121	25.9475	21.3701	23.5428	22.1124	0	33.465	26.1538	23.6613	33.9644	18.9035	23.3808	28.7519	0	0	18.1238	22.5188	24.0002	27.922	26.3163	0	23.3597	22.9091	23.7812	21.4715	21.3181	22.4852	18.8993	20.2453
21.7481	20.8724	22.0419	19.2503	24.692	27.2596	32.8658	31.6548	24.6201	25.8019	27.3126	26.8242	23.8735	23.5817	25.9462	0	24.8299	25.4231	24.0217	25.5424	20.9205	22.7447	22.4441	22.1505	21.495	21.5983	23.9128	33.041	24.3128	20.5436	33.6716	23.9617	18.8602	27.1175	0	22.0471	22.0289	19.7958	24.9552	25.567	23.1658	21.5008	19.1441	21.5847	0	25.846	0	23.2732	18.8776	20.9884
24.6952	22.1775	21.9889	21.6308	0	25.7999	31.1832	30.1353	22.9502	23.7648	31.6628	0	24.5239	22.312	22.8067	21.9854	23.1953	0	22.3144	27.7699	0	24.1514	0	24.1583	20.8447	24.5317	24.5776	31.5992	22.5417	20.6282	31.8517	26.9667	0	26.5273	0	21.9591	19.9265	21.2554	0	23.6116	20.8944	20.5885	21.85	19.9964	0	23.0413	0	23.2397	0	21.2805
25.5427	19.7177	0	18.3909	24.1047	26.8296	36.9383	31.8665	26.7952	26.0533	27.3159	22.0131	22.9415	26.2075	28.3416	0	26.4826	24.4888	26.3445	29.262	21.7983	0	25.2492	0	23.8599	22.2554	0	33.3043	24.0188	23.0255	33.4917	0	23.3562	27.9855	0	17.5402	0	23.4115	24.4724	26.3778	25.5578	0	23.6167	22.5958	23.8402	0	18.6707	0	0	0
24.8694	18.7763	21.2639	20.3431	0	24.0449	36.0207	28.3449	22.2049	22.7181	27.3091	24.5686	22.7835	26.9321	24.8479	20.6477	21.4298	20.751	20.4222	27.5428	0	24.1434	0	20.2011	23.0408	21.9074	22.6102	30.1003	19.6409	0	29.9459	0	22.9011	29.1463	0	22.0923	19.1898	22.6003	20.504	26.5586	24.4425	21.2755	23.9659	21.6418	21.7406	22.5852	19.0116	22.4416	18.9894	21.8775
24.071	22.4055	22.0894	22.236	0	24.3795	31.3814	29.2306	22.2415	23.0958	31.7804	0	23.2398	0	20.151	23.1602	21.6545	18.7334	22.0384	26.8851	0	25.5073	20.7527	25.0416	21.7755	24.4862	21.3594	30.3725	22.0384	21.1823	30.8085	20.9611	0	27.005	20.4976	21.504	20.4627	21.5446	18.2605	25.1193	22.2949	21.509	21.6053	0	21.6473	23.3777	0	24.3083	18.3658	22.3281
23.9906	0	0	0	22.7017	27.4086	35.661	31.3822	24.1839	25.4177	25.9816	22.8824	23.002	26.0197	27.6388	0	23.6573	25.9623	23.7978	31.412	23.3508	20.0881	24.2175	0	24.7008	21.6721	0	32.9035	24.5865	21.8005	32.9724	0	24.8164	28.2223	0	19.7606	16.428	23.8023	23.2667	26.1746	25.8767	0	24.8323	22.2059	23.3376	20.7595	0	0	0	0
26.1609	0	0	0	22.0245	27.5418	38.4931	31.7455	25.232	26.0587	27.4816	0	23.4027	27.3997	27.1542	0	24.9514	25.1531	24.5153	27.9776	23.8895	20.0359	25.4255	0	24.5344	21.7604	21.8826	32.923	23.0053	0	33.6423	0	24.8149	29.2551	0	0	0	23.9039	24.2908	27.7569	26.361	0	24.3543	22.9487	24.5226	20.5023	20.165	22.0977	0	0
25.2684	20.3547	21.7613	19.2968	19.334	25.6085	37.3324	29.8897	23.0032	24.4729	26.2921	0	22.8218	27.515	27.9717	0	22.6476	24.5803	22.2846	29.6318	22.4222	22.2821	23.2912	21.5359	23.3427	0	0	31.4272	22.6366	21.4537	31.679	0	22.4009	27.4524	19.3875	19.2337	0	23.5738	23.8302	25.1944	26.1481	18.2955	22.7079	22.0986	20.2744	24.0783	0	22.4047	19.7225	19.9594
26.4225	22.148	21.9736	21.4593	22.7456	24.7452	35.7211	29.5074	23.5579	23.4942	30.4076	0	23.2956	24.5091	24.6981	23.1847	22.3386	24.0453	22.8785	28.7936	20.5982	23.9473	23.0943	22.7603	23.3304	23.6387	22.9718	31.1377	22.8921	0	31.2393	24.0035	24.9828	27.5799	0	21.77	22.5212	22.8356	22.7898	24.3536	24.0333	21.9166	23.497	20.5907	22.226	23.8781	0	23.2935	19.8824	21.8946
26.1023	0	0	0	24.4168	26.6403	37.9764	31.645	24.2097	25.3846	26.3792	0	23.2437	26.415	27.5343	0	24.2898	25.7159	24.7202	27.8999	22.9387	0	24.5752	0	24.6665	20.9394	0	33.3182	24.1972	19.7769	33.4261	0	25.7348	28.3193	0	0	20.351	25.1392	23.2035	27.3663	27.0979	0	25.1347	22.7828	23.9375	20.216	20.5993	0	0	0
25.1166	21.4835	21.8784	22.5486	21.2181	24.9999	32.9	29.2038	23.2956	23.8215	31.9389	21.5531	24.1283	24.388	22.777	22.9643	21.9101	21.5956	22.4842	26.5308	21.3388	25.3664	19.9363	24.7129	21.8684	24.1164	24.2128	30.281	24.6758	20.4812	30.9833	25.7065	20.6077	27.5599	21.6638	22.2607	20.5805	20.875	21.5778	22.5311	22.883	21.9972	22.613	19.7328	21.3251	24.4805	0	23.6721	19.3944	22.4815
26.6212	18.398	0	18.9838	23.9834	27.3527	37.914	31.9536	25.4904	26.6995	27.1307	23.0425	23.7483	27.9825	25.9117	0	24.9654	25.13	24.7361	28.1367	23.9832	23.3896	24.0923	0	24.6751	21.9169	0	33.5588	26.0172	22.4362	33.9782	0	22.521	28.6074	0	20.3179	0	23.4999	24.2179	27.9184	27.0942	0	24.265	23.5307	23.7225	22.3056	0	21.8482	0	20.9
23.772	0	0	0	25.12	25.7793	36.17	30.1182	22.9314	23.7236	26.1575	20.6213	23.9232	27.7056	27.0583	0	25.1826	24.3665	21.48	27.5494	22.5607	0	25.1345	0	22.42	22.7378	0	31.4791	22.0407	0	31.9318	20.4669	23.689	27.489	0	21.3723	0	22.5902	24.4062	24.7876	28.4739	0	23.1703	21.9773	0	22.6285	0	21.4811	0	0
28.0151	0	0	0	24.2089	26.2999	38.1685	30.4206	24.0024	24.5272	27.5618	23.691	23.2015	28.3731	27.9967	0	23.2715	25.4255	24.1256	29.2887	23.7748	21.2429	25.1378	0	25.4967	22.1492	0	31.9057	23.0254	0	32.3306	0	29.4482	29.5269	0	20.0845	17.3353	25.579	24.1844	27.8835	27.5692	0	26.2619	22.1258	23.759	22.685	0	23.0953	0	22.0087
21.9296	20.4651	0	0	0	29.0454	35.0224	33.1593	26.1434	27.6534	27.1934	0	23.151	24.263	25.0745	0	25.8672	25.1631	25.8164	27.7598	22.5251	20.3104	23.2306	21.7346	22.4917	20.5834	0	34.5208	24.6566	20.2596	35.07	0	21.451	27.3941	0	20.2785	16.9103	22.7409	23.5149	25.0766	24.6625	18.8677	23.2732	21.8834	23.1135	0	0	21.43	0	17.2682
24.4826	21.7067	22.1282	21.8871	19.6334	25.5821	29.9777	30.1877	23.0631	23.4866	31.2145	0	24.1214	0	22.5233	22.2862	22.2029	0	22.3889	24.9323	0	24.593	0	24.2124	20.9223	24.4196	24.0696	31.0026	24.2036	23.1534	31.472	22.0302	0	26.6795	19.2169	21.6276	20.7645	20.7922	20.789	23.1493	20.6838	22.7783	22.0579	18.7004	19.6908	23.8093	0	23.5939	18.7109	20.2608
28.1274	0	0	0	23.9742	29.5061	38.4414	33.4614	26.1715	26.9164	26.1508	0	22.2142	27.0409	27.6922	0	25.9008	24.8931	25.8879	29.3226	23.3791	0	25.8771	23.5514	25.85	20.3391	0	34.8636	24.079	22.2489	35.1666	0	27.1987	28.6359	23.0142	19.2935	19.4407	25.143	22.3934	27.1335	26.7473	0	26.2788	22.2747	23.2585	22.3865	0	0	0	0
21.4895	20.5003	21.5038	18.3041	21.1108	26.051	33.5962	29.7978	23.3441	23.9927	26.2787	20.6944	23.5216	25.5769	25.2746	21.0533	23.8264	23.3204	23.1436	25.4981	20.1397	23.1896	23.9019	0	21.5631	21.9559	23.8897	31.3046	23.5611	18.7202	31.7747	0	19.9705	27.8819	0	21.4164	20.3434	20.1801	22.6914	24.1757	22.573	20.5857	20.9944	21.8218	0	22.3859	0	21.996	19.3132	19.3297
25.0063	19.9849	0	0	23.3961	28.4124	35.3914	32.7609	25.5646	26.8434	27.5427	0	22.7897	27.3504	26.5962	0	25.3527	26.1212	25.1931	27.6544	23.3797	21.5471	25.8021	0	23.3653	22.7616	0	34.1838	26.1707	22.2485	34.363	0	23.5747	28.3749	0	19.3602	19.0393	21.5201	24.9866	27.7444	23.4536	0	23.0533	22.6168	23.7766	0	20.9199	19.7257	0	19.2285
24.8283	20.6717	0	0	23.8155	26.3524	34.817	31.0514	24.2405	24.6932	26.1745	23.3244	23.1686	28.1356	26.0766	0	23.4116	26.9562	24.0574	28.1315	22.3569	21.3186	25.0408	0	23.7429	22.4477	24.1886	32.7011	22.2806	21.83	32.9506	0	20.5792	28.1485	0	19.978	17.7104	21.4124	22.7848	25.291	26.3861	20.6342	22.78	21.7593	23.6373	22.7999	20.0693	20.5852	0	0
26.2072	0	0	18.5562	21.5371	27.8203	37.3292	32.2366	25.06	26.4253	27.8776	0	23.2399	28.2625	26.8836	0	24.8428	23.4873	24.9021	27.7089	0	17.5039	23.508	0	24.5419	0	0	33.5872	25.5982	23.0262	34.137	0	24.0237	28.5666	18.5197	0	18.0356	22.3585	22.0156	27.8242	27.2029	0	25.501	19.5947	24.0947	22.0234	0	22.426	0	0
23.1864	0	0	0	0	28.3185	37.709	32.6154	25.2544	26.3859	26.727	28.1899	22.7886	27.5485	26.7745	0	24.9391	25.6459	24.6916	28.0534	23.2726	0	23.8965	0	23.0998	0	0	34.1435	25.342	20.3057	34.5612	19.5605	23.9268	30.2839	0	20.5234	18.3446	23.6102	23.3193	27.8827	27.0523	0	23.3859	22.7097	23.979	23.9144	23.3075	22.6222	0	22.0459
26.2726	0	0	0	18.1068	26.2949	34.6284	30.3996	23.3787	24.4799	26.8322	0	22.4683	29.2134	25.6499	0	23.3205	26.0775	22.8329	27.6277	23.2553	21.56	23.5292	22.253	25.0998	0	19.7997	31.9611	24.411	20.3123	32.0906	0	23.0789	29.0009	0	20.7838	15.0457	21.7475	22.8311	24.9682	24.2744	19.2637	25.4805	22.6089	20.58	0	24.9029	21.2937	0	18.615
19.8849	0	0	18.5245	22.2004	25.4834	33.789	29.9817	22.6159	23.4703	26.5445	0	23.2027	26.622	26.8717	22.5136	22.0667	22.0908	21.7882	29.5231	0	22.7967	24.7373	0	22.8856	21.3713	0	31.0284	21.4164	20.1699	31.6149	0	18.4721	29.0243	0	20.8194	17.4527	20.8012	0	26.8459	23.207	18.9191	20.5973	0	22.1223	23.8393	0	24.3545	19.9659	0
25.7923	0	21.4847	0	23.6938	28.2123	37.6622	32.4175	25.1715	26.8642	26.7146	0	23.4285	26.7424	27.8258	0	24.9803	25.1455	24.6888	27.7136	22.6079	21.8048	25.2192	0	23.2732	22.1116	23.2295	34.0823	25.1639	21.5906	34.17	0	24.6318	29.1414	0	20.0173	21.0045	23.5125	23.0931	25.1032	25.7376	21.4396	25.2049	22.1798	23.2956	23.8949	20.8846	23.4556	0	20.7771
24.8561	0	0	19.5343	23.2631	28.8127	37.2049	33.0993	25.921	27.2197	27.487	22.3203	23.8179	27.1781	26.8831	0	25.4595	24.0476	25.4072	28.1485	23.7283	22.8302	24.745	0	23.9032	21.5901	0	34.5192	25.1171	22.5382	34.7629	0	24.2554	28.3616	0	18.5764	0	22.4272	23.7964	26.0158	27.1171	0	24.168	22.0702	22.2792	21.281	23.6536	21.8575	0	20.2634
21.4095	0	0	0	0	31.1064	28.8853	36.0245	28.9336	30.3657	27.6027	22.44	24.3971	23.1966	24.142	0	27.9272	24.8854	28.1398	25.7168	22.2569	23.095	0	0	21.7102	21.6524	25.7893	35.9171	29.2066	28.3233	36.6107	0	0	27.5692	0	20.7512	18.4728	0	23.8306	26.9983	0	21.9957	0	21.8721	0	25.4669	0	23.8363	0	0
20.0132	19.8416	0	0	19.3439	26.7585	37.6766	30.8542	23.8619	25.2897	27.1527	0	22.5691	27.8841	26.5033	21.7296	23.7607	24.4134	23.1029	28.5334	20.4271	0	0	0	24.6899	0	25.0114	32.8567	24.0157	21.9108	32.9296	23.6005	30.3828	28.5738	0	21.9647	0	25.0903	21.5047	27.0688	25.6491	20.0561	25.7478	0	19.6682	21.3654	0	22.0313	19.2577	19.8942
22.6895	20.7256	23.2724	0	20.9452	23.882	33.8381	28.8087	21.6943	22.9339	25.6774	0	23.1096	26.4686	23.0338	20.3069	26.4365	23.203	0	26.7085	21.5537	22.1745	22.9322	18.699	23.0888	22.0964	24.7052	30.4653	20.606	18.3629	30.6553	0	20.4387	27.3609	0	21.9004	20.3545	20.0189	21.8218	0	23.2477	22.6621	22.5775	22.1188	0	25.0116	0	22.5579	20.0211	19.1734
24.8737	0	0	0	24.0369	28.6918	36.3516	32.7223	25.6033	26.4709	26.5025	21.609	23.4324	28.3478	26.2224	0	25.4284	24.9685	25.2164	27.323	23.2839	22.5918	25.2349	0	24.1058	22.1068	0	34.2974	25.4187	22.8509	34.7693	18.9594	21.5289	29.1842	0	0	17.9407	23.0386	25.0121	27.4164	25.6861	0	24.4632	22.4431	23.0625	19.9522	0	22.8849	19.2872	20.2361
24.7115	0	0	0	0	26.7717	36.045	31.1103	23.7027	25.1745	27.5453	0	22.8803	28.9153	22.2494	0	23.4514	24.5611	23.3071	26.9558	21.8808	21.6471	0	0	23.7812	18.8116	19.9981	33.0866	24.5642	20.1748	32.9934	0	21.0261	29.9398	0	19.7925	16.7318	22.0134	22.0596	28.2905	23.6779	18.7223	25.7542	22.6039	25.2931	24.2652	26.0415	21.8444	0	19.458
0	19.9837	22.287	19.7482	0	29.9075	32.6741	34.6367	27.0793	27.9842	27.6965	0	23.0845	28.4127	22.9233	20.8762	26.0701	21.5827	26.4036	24.9573	20.5859	21.068	27.5581	0	22.0413	22.4696	19.2096	34.9471	28.855	28.4773	35.7109	16.1156	0	28.1137	18.7597	19.6816	17.4465	20.0639	22.4285	0	20.3862	18.8704	0	23.3541	20.8299	0	0	23.0871	0	18.9331
24.5353	0	0	0	24.452	27.9441	33.2185	32.6686	25.185	26.659	28.0366	23.795	23.2716	26.8703	27.121	0	25.0021	24.4607	24.7017	27.1019	21.7453	0	24.4872	0	22.1381	21.0914	23.5182	33.6824	26.1419	22.9521	34.325	19.8129	22.7586	28.1727	17.3159	21.5294	18.9871	21.2972	24.4255	25.8869	24.9403	20.2631	23.9869	21.8	20.8757	21.6961	21.5611	21.4903	19.0429	0
27.6667	0	0	0	22.2056	28.6736	38.104	33.1572	25.8951	27.1562	27.9117	0	23.5425	28.0671	26.3045	0	25.5762	23.3962	25.4089	30.8218	22.8709	21.0223	24.5648	20.3164	26.1481	21.5148	0	34.631	25.2236	22.4047	35.0451	19.8805	25.6212	29.4461	20.4305	0	0	22.3953	22.4497	28.2348	27.5751	0	25.1201	23.2152	23.9256	21.134	23.7928	0	0	0
24.2802	0	22.0365	17.2941	0	30.6163	37.4168	34.6105	27.553	28.5961	28.3818	0	22.8198	28.1662	26.1768	0	27.2168	23.7925	26.9319	28.2178	0	21.2337	25.6494	0	23.2416	21.1397	21.9113	35.6763	29.2296	25.9332	36.2459	20.8964	23.0375	29.22	0	0	0	23.29	22.5673	25.5094	26.3427	19.7693	25.1687	21.8005	22.122	24.4281	0	22.5961	18.5766	20.6178
21.8928	0	0	0	19.0925	24.5334	34.7922	29.0378	21.8856	23.014	28.0944	0	22.8486	28.2437	24.3025	0	21.0755	18.6352	23.1216	26.5124	0	0	0	0	21.999	0	0	30.2808	21.9276	0	30.644	0	0	27.9737	0	20.4611	15.6619	22.6534	21.076	29.1244	24.1401	0	21.1477	21.8304	24.6046	0	0	21.2147	0	0
0	20.081	0	0	21.2515	26.4101	34.1407	30.4791	23.6486	24.9289	26.7585	20.534	22.8196	26.6853	25.6298	0	23.5241	26.5886	22.9825	26.5694	21.7856	19.8699	0	0	23.343	21.5153	25.5152	32.1869	22.3501	0	32.1577	0	22.6863	27.9512	0	19.8886	17.4377	23.2738	22.5012	23.6739	22.9625	21.3223	22.2569	19.7487	0	22.312	19.6294	22.5313	0	0
22.1293	19.9146	21.7836	0	0	26.6555	34.5182	30.6839	23.5982	24.5586	26.9428	0	22.7498	24.9806	25.6539	20.9762	23.6338	24.7108	24.0621	25.7543	22.3845	22.8037	23.7469	21.9835	21.6244	22.0571	25.5836	32.3976	22.5169	19.6361	32.3999	0	18.0485	28.2921	0	23.2529	21.7589	20.2313	21.9305	22.1947	22.5294	22.454	19.8828	21.5355	0	24.7339	0	20.9622	0	18.9337
22.0127	21.9548	23.1418	21.899	0	26.0948	32.7152	30.1803	24.2824	24.6745	32.0434	0	23.4474	0	21.7856	23.4601	23.9988	20.9859	23.7024	25.5717	0	24.4696	0	21.666	21.8664	23.3468	23.3283	31.5206	24.373	19.7936	31.9626	21.796	0	25.9806	0	22.0965	19.9462	20.165	24.0202	24.4149	21.4645	20.2016	21.1064	20.8861	20.8627	26.8131	24.6603	25.0001	19.484	22.7413
24.418	20.5624	21.28	16.1426	0	27.1446	35.7923	31.1251	24.0607	25.2414	27.9062	0	22.8304	27.3899	24.7541	0	23.9333	24.2491	23.8579	29.7502	22.0559	23.4694	21.4719	18.2404	22.2562	21.5906	23.3542	32.8822	24.0606	23.246	32.7446	21.147	24.1084	28.9401	0	20.9412	19.9013	22.4566	22.0215	24.2876	24.5729	22.001	24.7831	20.9809	19.5894	27.798	0	22.8399	0	21.3487
22.7646	22.5032	23.2423	20.906	0	24.7666	28.8934	30.0801	22.5673	23.949	31.273	0	23.5787	0	21.5644	23.5924	23.0164	0	22.3909	26.0675	0	25.1477	23.6201	22.9293	21.3875	23.7155	23.5186	31.2945	22.9587	19.8895	31.6026	19.7063	0	25.6782	22.0153	22.0639	20.735	18.2162	0	23.5212	17.6841	21.4466	20.8848	20.1833	20.3925	26.2768	0	24.4209	19.6708	22.426
22.7395	18.389	0	0	20.9971	26.318	35.0682	30.9118	23.5299	24.8043	26.4078	21.2472	22.6946	28.791	24.0371	0	23.3113	25.5726	22.776	27.076	23.641	22.3336	25.1748	0	24.1566	21.8532	20.597	32.5657	23.4553	19.7558	32.5082	0	23.6378	29.8161	0	19.7073	17.531	21.1829	22.3971	25.1876	23.5103	18.4554	23.5853	22.4472	21.7475	24.586	22.9597	21.0214	19.4725	19.1253
20.7236	0	21.5816	0	19.8433	24.8005	29.7236	29.4395	22.5293	23.1149	27.4067	21.6675	23.1866	28.5257	24.5839	0	22.2852	21.4979	21.9053	25.2773	18.0706	21.7701	22.9956	0	21.9465	21.3492	0	31.0867	23.4294	21.2399	30.7902	0	18.757	29.3009	0	19.4529	18.338	0	22.7757	22.7855	19.1136	20.1789	0	19.3218	22.3953	20.5995	0	20.9119	19.4774	0
19.639	19.9518	20.6013	0	17.829	26.3647	30.593	30.3568	23.5298	24.7986	26.7749	0	22.5593	26.81	22.3289	0	23.0716	23.5592	23.1025	24.2018	23.0441	23.7656	0	0	21.3658	0	20.2842	32.319	22.5901	19.6572	32.1687	0	19.8779	27.1463	0	19.187	19.0931	19.644	21.6245	25.7634	18.367	17.8721	20.472	21.5153	22.7173	22.1296	0	21.1058	0	0
0	18.6146	21.3107	0	19.7185	27.703	34.98	31.9096	24.5221	25.9803	29.8143	0	22.569	25.0712	27.8431	0	24.3962	23.8441	23.7462	31.1032	20.6584	21.5402	0	22.6663	24.0538	21.9417	0	33.6317	24.9835	22.1254	33.7838	0	20.3192	26.4575	21.1631	19.8457	16.9694	24.2389	21.9544	24.377	23.853	0	23.0497	20.3219	0	0	0	22.6387	0	0
21.4716	22.9395	23.7277	22.5787	0	25.9991	28.5437	30.6808	22.8166	24.4931	29.3262	0	24.033	22.2954	22.0912	24.7165	23.0323	20.0913	21.861	26.2719	0	24.6914	20.9072	0	20.8511	24.5284	24.6117	31.7213	22.7874	21.4552	32.2088	0	0	26.7775	0	22.2204	21.534	0	20.2364	24.2425	19.2541	21.2015	0	21.1358	21.6611	26.1927	0	24.9996	19.7188	23.3377
23.5073	19.9773	0	18.3839	19.0029	26.3061	36.2415	30.7725	23.3229	24.6411	28.7332	0	22.3992	27.3447	25.6202	0	23.0942	21.9007	22.441	27.5316	21.3092	0	23.6775	0	21.9568	0	24.2717	32.4414	23.2595	0	32.4276	0	22.7041	27.868	0	22.0523	19.8598	22.1327	22.2951	28.8707	23.9537	19.277	23.9127	21.0293	23.6571	22.0607	23.0083	22.2135	0	18.945
23.307	0	0	0	18.6188	26.455	36.7022	31.2134	25.0387	25.0004	26.7538	21.3409	23.2353	28.0773	26.8886	0	23.5497	24.2687	24.8489	27.9938	21.9749	20.7603	25.8689	0	21.9406	22.1057	0	32.8604	22.3286	20.4345	32.9778	19.6416	25.596	28.8801	21.5201	21.5677	18.6879	21.9151	22.2718	26.6195	24.4081	0	21.6444	20.3039	21.7197	22.8116	0	20.7458	0	0
0	19.4174	0	18.5264	20.6362	26.4993	34.6199	31.2209	24.2232	25.366	27.0323	0	22.5099	26.7954	23.232	0	23.8818	23.8651	23.6766	25.9141	20.1092	21.2779	0	0	22.7465	22.5338	0	32.7948	25.1174	20.9688	33.1396	0	20.6737	27.046	0	19.7184	17.0884	21.4955	21.6306	25.1613	22.6285	0	21.9073	20.7549	20.5458	0	0	20.9099	20.409	17.6859
25.3386	0	0	0	23.1279	27.3231	37.8016	31.7692	25.1096	26.1854	26.5933	0	23.4801	27.6253	27.4874	0	24.939	25.641	24.9846	28.6613	23.9331	0	25.2188	20.3744	24.0212	21.8593	0	33.6267	23.4371	0	33.722	0	26.793	29.0107	0	0	0	24.2203	24.0477	28.2594	26.8744	0	25.0938	22.4064	24.9472	0	0	21.4955	19.8074	0
19.4314	20.8298	0	17.3883	0	25.5327	30.3898	30.2075	22.764	23.8	24.6818	0	21.7648	26.2478	23.5551	18.6735	22.2244	25.6489	22.0693	23.5659	23.2728	18.5268	20.2807	0	21.1526	22.0921	0	31.4098	23.4933	21.169	31.6025	0	19.3623	27.5207	0	20.3476	18.659	19.2659	21.0957	21.7831	19.2501	20.6476	0	22.4121	19.2639	21.1109	21.5671	22.5319	19.3849	19.0029
23.7832	20.5979	21.6742	20.2693	21.1216	24.8928	32.2032	29.466	22.9119	23.9086	28.9905	0	24.0298	22.8726	25.0857	22.7447	23.295	22.2292	22.225	26.5426	18.1374	23.5105	21.9672	21.1825	20.7229	23.2558	25.5802	30.7778	24.2085	22.9879	31.141	27.2122	23.2972	27.1126	0	22.1726	19.3605	20.3156	22.7824	23.8438	22.093	20.6931	20.9848	20.3308	21.274	22.4435	20.9825	23.4564	19.0327	22.2245
26.8838	0	0	18.4451	22.9652	28.8114	37.4916	32.8366	25.1969	26.1112	27.0742	23.8534	23.2396	27.1338	27.7547	0	24.9395	25.3946	25.0206	30.0621	23.9382	21.5381	27.0451	0	24.481	19.7612	0	34.4327	25.0685	0	34.1711	0	25.9817	29.2933	0	0	19.3289	23.7442	23.3447	27.4207	25.7579	0	24.8636	22.5226	23.6789	22.011	0	21.2676	19.0003	21.0505
24.97	21.6908	21.3045	21.4804	22.8509	28.0077	35.2054	31.9284	25.0381	26.2849	27.5228	20.73	23.9142	26.3686	24.5104	23.9314	24.6249	24.3283	24.5009	26.4496	22.7026	21.8538	23.547	20.5027	23.0997	22.5443	26.1753	33.0848	24.8152	22.2985	33.7575	20.7215	24.2877	27.7204	0	22.0371	19.7705	20.5191	24.1066	26.5236	24.7668	22.2344	24.1211	21.9065	22.5875	24.2754	0	23.1978	20.1048	20.3361
27.647	19.7008	0	0	23.9223	27.9095	37.5256	32.2083	25.0437	25.7421	26.7495	0	22.3371	27.1374	27.9082	0	24.698	26.1795	24.5935	30.0828	24.1338	0	26.1829	0	25.3686	21.1758	0	33.4437	25.4566	21.8799	33.7798	0	28.0339	28.9576	0	0	19.5	23.9528	23.2767	28.2152	26.218	0	25.2002	22.9472	24.324	0	0	21.4558	0	18.4521
26.1633	0	0	0	23.9287	28.0572	38.1227	31.9207	24.9005	25.5617	26.0073	0	23.5097	26.2191	27.965	0	24.3213	25.7025	24.2123	29.6883	23.9175	22.3109	25.9015	0	24.254	0	0	33.658	25.2099	20.7696	33.7352	0	27.0489	29.5752	0	0	20.0452	24.4933	22.7599	27.9205	25.826	0	24.735	22.8086	24.4402	0	0	22.5172	0	0
25.9864	18.9162	0	0	0	24.1003	36.3669	28.7739	22.1544	22.8946	26.8616	0	23.6723	25.3748	23.9679	0	21.9711	21.6521	0	29.1718	0	0	19.5105	18.3321	23.6276	19.2923	26.296	29.8846	20.1338	0	30.4813	0	20.3059	26.9324	0	21.9628	17.477	23.8032	0	23.6063	24.7164	19.8127	18.6049	20.2245	18.7431	23.2892	0	22.1501	18.5844	0
24.8192	0	0	0	24.6337	25.8344	34.8132	30.4738	24.4906	25.4303	25.2387	0	22.2581	26.4357	25.5423	20.3007	24.3128	24.1013	24.0469	26.6418	23.2292	24.0837	25.0169	24.2509	23.4296	21.4269	0	30.8644	22.7428	0	32.752	0	26.2268	28.0202	0	22.4424	0	22.8163	20.7743	26.4657	27.1433	20.3494	22.335	22.4026	24.5654	0	0	0	0	21.6032
27.1087	20.7916	0	16.9163	23.7862	28.686	36.6604	33.0548	25.7522	26.6877	27.9202	0	23.856	28.7598	27.1711	0	25.4149	25.6611	25.287	28.6441	23.4777	20.5153	25.0522	0	24.9185	21.3418	22.0917	34.5663	26.7365	25.0301	34.7941	19.818	24.8959	29.2276	0	0	17.6875	23.047	23.8387	27.2608	26.0418	0	26.139	22.7159	23.5024	22.207	25.5552	21.3768	0	19.6847
23.4531	22.0296	22.0342	21.4166	18.1216	25.0282	33.0776	29.5993	22.4907	23.1707	29.1908	23.1725	23.5575	22.8717	20.8614	21.8805	21.5851	22.0566	22.6351	26.2276	0	25.9111	21.6899	23.1858	21.6706	23.4054	26.5566	30.8638	23.3179	0	31.2229	21.6602	0	27.7479	0	22.7572	22.8397	20.9153	20.4237	21.6414	22.4764	22.9517	21.6293	18.8549	20.8442	26.3353	0	23.487	19.3379	22.5235
25.7847	0	0	0	0	28.5789	37.5493	33.0726	27.7596	27.3468	27.3487	0	23.0761	27.7921	26.7051	0	27.2029	24.3465	27.4985	28.1211	22.5709	22.0467	24.84	0	24.9476	0	0	34.3694	29.0732	26.1183	35.0094	0	24.6606	29.4655	0	19.9415	18.6378	23.621	22.0203	27.7679	24.7627	0	25.0524	22.8062	23.7569	22.9885	23.8452	23.8314	0	0
26.9828	0	0	0	24.6385	27.25	37.7559	31.8934	24.3299	25.5844	27.2415	21.1262	22.8681	26.8809	27.4074	0	24.3075	25.5613	24.0029	28.9562	23.0461	23.1339	24.7806	0	24.954	21.8146	0	33.0385	24.0766	21.9132	33.4911	0	25.0428	28.1329	0	0	19.7922	24.1118	24.5417	28.0542	26.3204	0	26.2446	22.5375	23.688	23.5163	21.4379	20.5751	19.1271	20.669
23.0517	0	0	0	20.077	25.6283	36.2447	30.2589	23.0728	23.9288	26.7452	0	22.6394	27.0679	26.33	0	22.7455	25.1384	25.1991	28.4432	23.4832	21.7239	23.1757	20.3418	23.0287	0	0	32.0129	22.2233	0	32.0927	0	27.0916	28.279	0	20.1041	0	23.4737	23.254	28.0544	24.2596	0	21.8577	23.5308	23.5435	0	21.0951	21.6812	0	0
25.3428	19.6513	0	0	20.8873	25.1409	33.3081	29.8214	22.6755	23.2019	24.3627	0	23.8689	25.6898	26.2314	21.676	21.2173	24.7761	21.6464	31.8648	21.6771	22.7209	26.7047	0	22.5915	21.4011	0	30.9035	22.2369	0	31.01	0	20.2409	28.3009	0	21.2873	17.5273	21.8215	19.8014	26.8205	22.753	19.0047	19.3892	20.4043	21.7157	0	0	23.8704	18.5723	20.7709
23.8711	22.2368	21.0513	21.7692	19.3446	23.043	30.8343	27.4685	19.4026	21.1551	32.0413	0	24.2241	21.5793	21.0144	23.2879	0	0	22.4116	26.4217	0	25.3576	23.511	26.8741	21.0669	24.6491	24.7377	29.0743	0	0	29.4501	21.1206	0	27.7671	19.0278	21.9667	21.3105	21.0468	0	20.7682	21.0201	21.4133	20.4607	18.9859	20.2122	21.2256	0	23.5761	19.1104	21.4203
22.9824	21.7003	21.5575	19.1526	20.3362	24.7941	32.769	29.3025	22.6942	22.8431	27.3385	0	23.2339	27.2738	24.4053	0	22.2955	23.8147	22.6311	26.246	24.5276	22.6494	20.4094	19.0196	22.4869	20.5905	22.2978	31.1292	21.4686	0	31.0939	0	18.8364	27.0894	0	21.1079	20.4629	20.8399	22.8303	23.4381	21.935	20.0972	21.4425	23.2649	0	28.9064	0	22.1252	20.1339	20.3854
22.8857	18.8737	0	0	24.3769	26.3233	34.4952	30.3147	23.8903	24.4131	26.63	0	22.2969	26.8754	26.1199	0	23.6079	23.8807	23.9858	27.5597	22.5885	20.4094	23.5092	0	23.1937	20.3462	0	31.6304	24.3625	0	31.8104	0	22.7381	27.1433	0	20.0446	17.7911	23.2425	21.2085	26.1077	23.6528	19.4263	21.7265	21.973	22.9672	0	22.6941	22.0294	0	0
24.4118	22.603	20.626	22.4122	18.3039	25.5556	34.0832	29.6637	23.0848	22.6541	29.1133	26.054	22.3839	22.8356	21.9158	22.5537	22.213	22.9819	23.5587	30.4931	21.0997	24.8307	22.1388	25.5058	22.2781	23.2831	22.6702	30.9629	21.2471	0	31.2393	22.2312	17.9626	27.1546	0	22.5017	19.7096	22.5875	21.4933	23.9641	22.6831	22.9057	23.6585	20.3507	20.5151	21.4486	0	23.4678	18.4828	21.421
24.5561	21.1776	22.6958	20.8848	22.8211	27.5895	32.498	31.7218	24.7353	25.537	29.7358	0	24.396	24.9279	25.2036	22.4647	24.7864	21.434	24.559	26.9847	21.2942	23.0326	23.0904	21.5802	21.6988	23.658	23.5505	33.8634	23.8997	19.8955	33.6204	24.4089	25.0567	26.8738	0	22.2677	19.5002	21.245	23.2292	25.7409	23.414	19.8397	23.4546	20.3607	23.1534	22.5927	0	23.5409	19.3807	21.7452
24.4154	20.0568	17.5698	17.8007	20.2868	26.2128	35.9933	29.9842	23.0937	24.2705	26.4619	0	21.9171	25.0987	25.5343	0	23.2117	23.8968	23.1427	29.0161	22.0579	21.5945	22.1566	0	22.5566	21.5264	24.5795	31.4631	22.0853	0	31.4928	0	20.6649	28.345	18.5244	22.8634	18.9487	22.062	22.0938	23.0795	24.8003	21.8745	22.1985	22.2491	20.2664	23.9148	0	22.0039	0	19.937
21.8432	21.9153	22.0034	20.248	18.928	26.2504	32.3406	30.2901	23.2529	23.8058	28.5191	0	22.9315	23.5038	22.6626	21.5311	22.9378	19.8684	22.286	26.2267	20.4534	24.0757	26.5965	21.827	21.4314	22.2101	25.7916	32.025	22.8916	0	32.0635	24.5	0	27.3963	17.9982	22.1046	22.5929	19.664	21.5733	21.5607	22.2806	21.6577	0	19.9018	0	24.2996	0	23.0464	19.473	22.1709
22.7686	21.73	0	0	20.8799	29.666	36.5844	33.9482	26.8169	27.6331	27.4309	0	23.9081	25.7053	25.9979	0	26.1818	25.7854	26.4724	25.5199	23.7334	22.4742	23.5912	0	22.0076	0	21.9257	35.6622	25.633	24.4879	35.7204	0	21.1224	28.7453	0	0	19.3245	22.3471	22.696	24.2965	25.1655	18.6322	23.546	21.979	20.8188	24.041	21.4789	22.8804	0	21.7166
20.743	0	0	0	0	25.7826	35.4315	30.0287	23.5546	23.8602	24.9868	0	21.954	28.3118	23.1635	0	22.8767	25.2713	23.5794	25.792	22.0709	20.981	25.9397	0	22.1257	0	22.8884	31.0953	23.2995	21.7641	31.6118	0	21.0028	28.3553	0	18.6801	18.1164	21.0356	22.2462	24.9195	23.7369	21.4254	21.4447	20.8766	20.4298	22.9741	24.1475	22.0657	19.213	19.5216
21.3609	20.6707	0	0	0	27.879	36.6996	32.3083	25.0165	26.6273	28.1101	0	24.2656	26.9521	27.5014	0	24.8889	23.7386	24.568	28.504	21.2337	0	0	23.2268	24.3007	21.696	23.2021	33.8757	26.3462	22.3656	34.2326	0	26.7474	28.2007	0	21.6229	0	24.0952	22.3728	28.2248	27.5715	20.5436	25.854	23.3872	22.8547	22.2373	21.9554	22.3114	0	17.9918
0	18.9615	0	0	0	24.4192	27.3772	29.2173	23.0843	23.5664	26.7422	18.9165	24.1112	24.7088	23.0909	20.0796	21.9676	22.5525	23.4982	23.8352	20.7263	21.0019	0	0	20.3758	22.8216	0	30.4243	21.405	0	30.8956	18.9494	0	26.6196	0	20.2621	17.5665	0	22.7893	0	0	0	0	20.4014	0	0	0	23.1039	0	19.9363
22.7632	20.71	0	0	19.2575	25.9448	27.1947	30.6433	23.5768	24.6411	28.2387	23.2401	23.2307	0	29.0161	21.4367	23.3399	24.0738	23.275	24.3235	0	20.0794	19.7923	20.6511	20.9629	21.0007	0	32.0054	23.3647	20.0583	32.2986	0	0	25.561	0	20.0822	18.0583	21.6483	19.2721	0	0	0	0	0	20.6335	0	0	19.6533	0	17.9858
27.125	19.4503	0	20.9153	24.9161	26.5334	37.5551	31.0733	23.8428	25.0736	26.7436	0	23.5694	27.4719	27.7083	0	23.5168	26.2231	23.7897	27.9864	23.751	21.5663	26.1664	0	24.5163	22.2119	0	32.2664	23.9549	20.095	32.818	0	23.6259	29.3819	0	20.2774	19.1531	24.1423	23.8967	28.1302	27.3244	0	25.1392	23.2608	24.1846	21.1635	20.1968	21.8943	0	18.446
26.9377	0	0	0	24.6361	27.6393	38.6623	31.7986	25.4912	25.8994	26.478	23.7902	22.447	27.1551	28.8752	0	24.8815	25.8709	24.733	29.1026	22.9963	22.0959	25.0963	0	24.5604	21.6218	0	33.5687	24.5779	0	33.4902	0	28.1652	29.1538	0	0	19.1216	25.6549	22.8429	27.5062	28.0532	0	26.0702	21.6708	23.8341	22.8323	0	21.1105	0	20.79
27.7588	0	0	0	23.7164	27.0605	37.3046	30.917	24.6302	25.3021	27.8663	0	23.6832	27.4853	27.9115	0	24.1559	25.2253	24.3327	28.4371	22.9048	21.6693	24.7966	0	24.9408	21.67	0	32.5522	23.0037	21.9067	32.6384	20.2219	25.6332	28.5663	0	0	17.9906	23.8075	22.7173	28.2837	26.2141	0	26.073	21.9786	24.2934	23.0295	19.4541	23.232	0	20.7371
25.8998	21.5675	22.0987	22.3061	22.0437	26.3732	36.121	30.8751	23.8651	25.3488	29.8057	0	24.029	26.1498	26.4718	23.0698	24.3239	23.8272	23.7551	28.175	21.971	23.7111	23.3451	24.4206	23.492	22.2794	24.5807	32.5842	25.235	23.4287	32.9459	23.0029	25.476	28.4512	0	21.0364	18.71	23.3745	24.2032	27.2548	25.2109	19.6973	24.8311	21.8313	23.3549	22.7195	0	21.9614	19.3071	21.6351
23.8155	20.9126	22.247	22.1025	22.6327	27.1559	34.6359	31.7472	24.5688	25.5345	29.5278	21.5063	24.513	25.6138	25.4155	23.2155	24.2231	24.0003	24.1529	28.4369	20.9764	25.1068	23.7654	21.6657	22.5752	23.453	22.9358	33.4124	24.1949	21.4547	33.437	22.7301	22.389	27.6221	20.798	21.2631	19.8796	21.2692	22.725	25.5126	22.3565	19.912	21.8604	21.3812	23.4635	25.5113	23.9232	24.3826	0	22.1857
26.17	19.9763	0	0	24.098	28.8307	36.9713	33.3647	26.3196	27.9769	27.5933	0	24.2321	27.6103	26.3419	0	26.1278	24.6066	25.7868	28.204	23.377	22.3953	24.7631	0	23.8906	22.0333	0	34.6579	26.7323	23.4987	35.1525	0	24.2041	29.0627	0	19.2642	17.5923	22.7618	24.5129	26.7815	26.1919	0	24.6515	22.4086	23.7654	22.0989	20.1092	21.2233	0	21.0317
19.3611	0	0	0	0	26.0569	34.9909	30.1256	23.2244	24.5051	26.1193	0	23.3104	28.7645	22.7645	0	23.2034	20.7465	23.2545	26.7998	19.9572	22.5094	21.167	0	22.7679	0	21.946	31.7511	23.0189	19.1703	32.0832	0	20.945	27.5022	0	21.0013	16.1175	21.8431	21.6837	25.7784	24.3527	0	21.7589	19.8314	20.4283	25.4909	0	20.2297	0	0
21.8325	19.0693	0	0	21.2037	26.4577	36.9897	31.1392	23.6798	25.1874	26.6413	0	23.0331	28.3721	26.8851	0	23.432	25.753	22.5967	27.4023	23.6323	0	25.7267	0	22.7677	21.0106	23.666	33.1183	26.218	24.5673	32.8198	0	25.9224	29.6242	19.6964	18.2169	17.8846	22.807	23.1275	24.8971	25.4479	0	22.3352	21.3689	21.7699	0	0	21.5361	0	0
27.5348	0	19.9061	0	24.7681	28.2158	37.4269	32.6237	25.3151	26.0544	27.4618	23.4474	23.4295	27.3997	27.9715	0	25.0351	24.9907	24.5982	30.0962	23.2368	0	25.1346	0	24.7203	22.3746	0	34.1768	25.701	21.8094	34.5851	19.0794	25.1401	28.6728	0	0	0	24.5402	24.3407	27.9323	26.5585	0	25.9455	22.9928	24.0455	23.0122	21.6942	22.456	18.4649	20.8056
22.7558	19.9477	21.9087	19.9852	20.8442	24.206	26.6699	28.3185	22.8445	23.0727	29.1573	0	24.9173	22.7094	23.6848	22.1664	21.6885	22.6293	21.6283	24.9868	0	22.4911	22.6636	21.7999	0	24.2457	24.9338	29.6434	0	0	30.0791	22.7857	0	23.6531	20.2906	20.8083	20.4066	0	21.4376	0	0	20.7405	0	0	0	21.6098	0	22.1477	18.752	21.3152
24.991	22.1173	23.0393	22.3858	0	25.8225	31.9435	29.2153	22.0577	23.4282	32.5146	0	23.9928	0	21.7758	24.5835	21.4931	0	22.7743	26.2739	0	24.9704	0	24.3203	21.7072	24.5653	26.149	30.3857	21.1528	0	30.9148	26.8047	0	27.3124	19.5036	22.2515	22.7155	19.3332	22.8738	23.311	18.5636	21.8639	22.8176	20.8494	20.6774	25.2055	17.8934	24.1217	19.4001	22.9093
20.5406	0	20.2587	0	0	23.2539	33.071	28.1906	23.1882	22.7434	25.8828	0	22.385	25.6133	25.0185	21.1433	21.518	24.768	20.3341	25.5309	22.0291	0	23.2642	20.0907	22.4909	21.7076	22.0589	29.824	0	0	30.2611	0	23.5853	26.7298	0	20.6937	17.4677	22.4928	21.764	25.0474	22.9615	0	21.7624	21.7164	22.3311	21.5779	0	22.9658	0	0
26.9058	0	0	18.5592	22.3824	25.6968	36.4422	30.1193	23.5014	24.4517	26.4141	0	24.1394	26.1363	28.0816	18.972	22.9712	24.098	22.9667	30.4435	22.6501	23.1146	24.3899	0	24.2246	22.9928	0	32.0603	23.2468	21.8853	32.2133	0	23.5545	28.0246	0	18.2317	17.6291	23.4461	22.8865	26.5695	25.9623	0	24.6293	20.9746	22.3939	0	0	20.2957	0	0
0	18.4201	0	0	0	23.5409	33.1182	28.2752	19.5032	22.0563	25.6113	0	21.9732	19.9378	23.9885	21.4662	19.6459	24.7314	0	26.0998	21.0132	23.671	24.0977	19.5347	22.5491	22.9092	0	30.0961	19.5942	0	30.0574	0	0	26.2503	0	20.7251	18.8933	24.3743	21.109	24.465	21.7036	19.6562	21.6433	20.6875	0	0	0	0	0	20.531
21.0037	20.464	0	0	19.6757	31.5403	33.3924	35.4239	28.3576	29.2341	27.7637	0	23.434	27.0368	25.2755	0	27.8122	25.9159	27.8108	24.9419	23.4753	0	25.388	0	22.2491	0	0	36.5148	28.0967	26.6602	36.9191	0	0	28.5568	0	19.244	18.5914	19.6858	23.709	24.3816	22.6941	0	0	22.7852	20.8838	25.4115	0	21.1306	19.7526	0
22.298	19.2846	23.5814	18.1171	22.812	27.7144	32.5561	31.9506	24.3114	25.2234	25.6381	0	22.1719	28.3356	26.4906	0	23.8919	26.0735	23.6742	26.7023	23.4498	0	27.7197	0	22.7585	20.7057	0	33.6029	24.0544	19.3722	33.6297	0	23.2167	28.7731	0	20.0394	20.4929	20.8649	23.1094	24.4287	20.345	17.6985	21.5578	21.7571	21.2206	21.3882	20.3976	21.4495	0	0
21.6639	19.7179	0	0	20.5817	29.4348	30.2557	33.5371	26.3104	26.736	26.5051	0	21.8371	27.1559	22.1549	0	25.6808	25.5509	25.8255	23.9508	23.0891	0	26.9795	0	20.8605	0	0	34.7546	27.9477	25.1819	35.2999	0	19.4878	28.9499	0	0	18.6562	0	22.7634	24.2514	19.4307	0	0	22.1254	20.1079	0	0	22.1733	0	0
23.6114	19.6852	21.292	17.4307	23.141	26.2765	33.4545	31.4654	24.6654	24.8499	26.5563	0	23.3061	26.5201	25.2193	0	24.3388	23.3558	24.272	27.6669	21.6415	20.8815	23.1073	0	21.879	21.8433	0	32.8119	25.0808	21.5021	33.1944	0	23.2213	27.2966	0	19.8802	18.3834	21.25	22.1997	25.1905	21.3939	0	21.4638	21.3021	20.4578	0	0	19.8384	0	18.8082
28.0621	19.8225	0	19.2239	24.294	26.8289	37.1073	31.4583	24.0481	24.6617	27.2254	0	23.5001	27.5866	27.6762	21.2913	24.0817	24.7525	24.2363	30.6659	22.4751	20.1174	26.0561	21.756	25.2727	21.7517	0	32.6855	23.2581	20.4425	33.2648	21.0744	24.2122	28.4209	0	0	18.8505	23.9797	23.2947	27.3254	26.2897	0	25.4045	22.5465	23.744	0	0	21.9282	0	20.5537
28.0839	0	0	17.2763	23.7963	28.1983	37.5892	33.1044	25.9949	27.3921	28.2342	22.5794	23.5796	27.9535	27.2015	0	25.6318	24.7202	25.4224	28.1548	23.2853	22.1482	24.3059	0	25.255	21.5829	0	34.6441	23.9164	20.8633	35.0309	19.3046	25.2044	28.819	0	0	0	22.9435	24.6437	27.625	26.6834	0	25.4321	22.985	23.7712	21.8766	22.0059	20.9121	0	21.1475
23.3883	20.9439	21.2828	18.2809	21.3145	24.6989	33.3639	29.3873	22.672	22.8019	26.574	0	22.9162	24.902	24.6596	21.2556	22.5276	22.6001	22.9679	26.6845	20.5285	22.3433	22.1519	19.6743	22.3316	21.9753	21.4157	31.0345	21.168	0	31.1244	0	23.1079	27.376	0	21.5667	19.6613	21.4331	22.2047	23.623	21.7839	19.958	21.8306	21.1548	18.2701	23.586	0	20.8033	18.9417	19.8483
21.2491	22.0594	22.5755	20.7105	18.5134	24.4184	28.9869	28.7541	21.8257	22.4297	30.3106	0	23.65	23.7626	21.8414	23.6643	21.5937	0	21.1732	25.3568	0	24.9488	24.1951	23.5521	20.6974	24.3961	25.5977	30.0726	24.7808	0	30.4417	24.0522	0	27.491	17.928	23.0055	22.0413	0	0	22.742	19.2956	22.2612	20.4121	19.6153	20.4101	26.1442	0	24.0562	19.3383	22.3006
24.4952	0	20.4919	0	22.1001	28.8888	36.7924	32.8529	25.8058	26.7727	29.1146	21.8173	22.648	27.428	27.1699	0	25.4973	23.5367	25.326	28.9671	22.5075	23.6496	24.8405	21.3299	23.7407	22.8949	0	34.6467	27.1846	24.0484	34.4452	22.0089	25.3766	28.5683	21.6621	19.4331	20.5953	22.8738	23.7752	27.9562	24.196	18.4011	23.2421	22.6837	23.9337	0	23.0707	20.8466	0	0
27.9732	0	0	20.9025	24.7875	27.6684	36.5006	32.3419	24.6541	26.0658	27.7073	21.3016	23.3601	27.5126	27.701	0	24.6437	25.9004	24.4024	29.1877	23.0788	22.0169	25.179	0	25.6766	21.5123	0	33.6859	26.3528	21.7888	34.2005	21.5344	25.3041	28.7473	0	19.9681	0	23.0218	23.9568	27.4369	25.7121	0	25.8138	22.3666	23.2518	20.8561	21.4313	20.8258	19.6406	19.9535
22.6967	0	19.3304	0	21.587	27.3292	36.2996	31.4566	23.5861	24.6918	28.4383	0	22.5869	27.7079	24.8079	0	23.3672	23.6641	23.323	26.875	21.6222	23.3234	22.218	0	22.8533	21.6046	22.8027	33.0038	26.4966	21.3515	33.2289	20.3807	20.4056	29.2545	0	20.5954	18.7383	22.7449	22.0389	28.5443	23.7937	19.3869	24.4201	21.9906	25.8661	24.8573	26.2186	22.6233	0	0
28.4722	20.2156	21.563	16.5876	23.4331	29.458	35.9564	33.2064	26.142	27.0959	28.4612	0	23.8843	28.2177	27.6776	0	25.8397	24.8005	25.4858	29.6375	22.9959	21.3952	25.2419	0	24.6316	22.0117	0	34.1006	24.3808	19.7368	35.1674	0	23.3123	29.389	0	20.6275	0	22.332	23.4745	27.1325	25.3367	0	25.5831	21.9723	23.421	21.2477	21.5759	21.639	0	19.3783
25.1013	20.5873	19.4499	17.776	20.5536	24.6439	35.9912	29.2817	22.2832	22.7176	26.4397	0	22.3248	26.9092	25.4626	0	21.4379	22.4889	22.0812	27.0794	19.5107	25.3885	22.1549	20.0338	23.1976	21.8066	23.6353	31.2184	22.7037	0	31.105	0	19.4808	28.3634	19.146	20.3887	20.1542	23.2999	22.3127	22.9955	23.8154	20.5688	22.4891	21.5011	0	24.4717	0	22.4458	0	19.2946
23.0017	18.3953	0	0	21.1726	28.2972	37.0854	32.5902	25.5732	26.8499	27.2167	0	22.8359	27.1168	25.1191	0	25.2744	24.9027	24.973	27.747	23.076	21.2251	22.1723	0	24.1241	21.8056	0	34.4794	24.6924	20.6033	34.4891	20.5431	21.5243	27.4968	0	0	18.9307	24.0688	23.914	26.9052	25.2299	17.8288	23.8859	21.9094	23.102	0	0	21.2456	0	0
28.3285	0	0	0	23.7387	27.1773	37.8803	31.2875	23.8724	25.4186	27.1911	24.003	23.7313	28.2096	28.081	0	24.0791	25.986	23.8095	28.8415	23.6444	21.3672	25.1616	0	25.318	21.8409	0	33.0746	22.8007	20.0594	33.3029	17.8785	26.9146	28.925	0	0	17.4942	23.4349	23.696	26.9698	26.7379	0	25.4841	22.8217	23.5469	20.6293	0	0	0	18.9436
20.8974	21.742	22.4264	21.0258	21.0528	28.6277	27.5686	32.8687	25.5524	26.7398	29.1162	0	23.5662	22.8538	22.0683	21.8508	25.1554	22.26	25.13	24.0353	0	25.0596	0	22.175	20.9758	24.15	21.6944	34.0539	25.4334	23.6059	34.414	0	0	25.7064	20.157	21.2879	19.1471	0	22.2023	24.7079	18.1804	22.3163	0	0	21.659	24.2863	0	22.884	0	21.366
28.4835	0	0	17.0049	22.7533	29.5389	37.3768	32.9562	26.675	28.1846	27.9702	22.0154	22.8535	27.9948	27.3947	0	26.3801	26.1423	26.404	29.3155	23.9491	21.3233	24.8426	0	26.1053	21.4449	0	34.653	25.2332	20.7253	34.9876	0	26.6919	30.203	0	19.6652	0	23.504	24.201	28.2136	27.7086	18.665	26.5426	22.9379	24.6722	20.1341	24.97	21.9764	0	20.27
21.113	22.1103	20.5727	20.4437	21.9444	23.7139	28.6064	28.4835	22.5723	23.2927	29.0325	0	23.5316	21.8861	22.0731	22.1586	21.9589	0	21.8152	23.4432	0	21.954	0	22.0832	20.3095	23.0638	23.6408	29.9076	21.6713	19.6566	30.1353	23.4519	0	26.8309	0	22.9126	18.1875	19.2995	21.1755	25.0222	0	20.4672	0	19.07	0	24.0828	0	22.291	19.55	19.3854
20.6188	0	19.679	18.7569	0	29.4399	35.1578	33.6234	26.0739	27.344	28.0572	0	22.0004	25.9838	26.7588	0	25.7782	25.0995	25.891	26.1049	22.3906	22.5104	20.3862	0	23.6606	21.5073	0	34.8089	26.7295	21.8575	35.4325	0	23.3422	28.0794	21.9419	0	18.8394	21.5931	22.7752	23.8348	22.9043	20.3314	22.1928	22.1319	20.0503	21.7799	0	21.1678	0	20.0676
23.1493	0	19.6797	0	0	25.0592	31.8282	29.4573	22.2566	23.3518	25.9368	0	22.885	26.0074	23.5172	20.4494	22.4887	22.9454	21.7296	26.6346	20.9834	21.2913	23.4294	0	22.3743	21.963	24.609	30.8826	23.1942	20.4709	31.2409	0	19.9244	27.1553	0	21.5757	21.3983	19.8798	21.5443	0	23.9043	22.4978	22.4309	20.1477	23.1365	0	0	21.5882	19.6842	0
22.2415	20.1996	0	0	0	29.2419	33.5632	33.2484	26.5662	27.0863	27.5327	22.0312	23.4468	28.1551	25.847	0	26.014	25.933	25.9302	25.4808	23.0406	0	26.5003	0	22.7874	0	0	34.2951	26.3379	22.443	34.9707	0	21.4569	28.7848	0	0	18.9793	19.6288	23.2433	25.6078	24.0961	0	20.1332	22.006	22.241	19.5138	0	21.7834	19.4601	0
26.9174	0	0	22.3689	21.5398	26.3719	36.4278	31.1586	23.4619	24.6677	27.5558	21.6313	23.2409	28.4358	26.6887	0	23.3848	24.1168	23.9942	29.475	20.9967	0	23.8558	20.8443	23.8524	22.2544	0	32.6754	22.7987	0	32.6968	22.6482	21.0108	27.182	0	20.3982	17.7445	22.5615	21.628	25.5947	25.4336	0	22.0921	21.7377	22.0633	0	0	0	0	0
26.3476	0	0	0	23.3223	26.922	36.8978	31.0405	24.0774	25.4336	27.0507	24.521	23.7788	27.7665	26.7829	0	23.7259	25.3361	23.909	30.3513	23.3096	21.3726	24.3074	23.45	24.5762	22.0207	0	32.8902	23.4356	0	33.0771	0	25.3868	28.3234	0	19.2989	0	22.996	25.0871	27.2429	27.6019	0	25.2293	23.2195	23.9236	0	22.0527	21.527	0	20.1332
21.851	22.0524	0	20.7037	0	25.4577	31.6321	29.83	22.7714	23.8099	27.4934	0	23.445	24.8787	22.8696	23.5062	22.9289	22.8582	22.56	26.8515	21.2673	22.7559	0	24.4605	21.4136	21.6935	19.9235	31.6232	22.7767	0	31.4035	0	0	25.546	20.0107	21.2673	19.6396	19.053	21.6375	22.9567	24.8408	21.7992	0	20.7619	0	0	0	21.6913	0	20.1961
25.7055	0	0	0	23.416	27.339	38.1045	31.6771	25.5579	25.5762	27.3439	0	23.3924	27.8405	26.9241	0	25.2937	25.8236	24.9581	27.8625	22.5777	0	25.7699	0	24.9258	21.3738	0	33.0685	24.9555	21.6133	33.407	0	25.015	29.5356	0	0	17.9391	23.7842	23.3168	27.0116	27.231	0	25.7112	22.1345	22.5908	21.9858	0	21.6348	0	0
24.4844	19.8003	0	16.7268	22.8909	27.086	35.8103	32.1551	25.4187	26.4401	26.3547	0	23.9189	26.6411	25.9184	20.1062	25.1691	23.7683	25.0804	27.4201	21.2969	20.3269	23.3145	0	21.4814	23.2726	21.9382	33.2307	25.2884	25.6843	33.5952	0	24.4464	27.6011	0	20.3145	18.3816	22.1962	23.3634	24.2558	24.1307	20.7425	20.7866	22.3078	23.6057	24.2917	0	21.2354	0	21.0569
0	0	0	0	0	23.0325	25.9676	28.3478	25.1915	23.0749	24.4335	0	23.6814	0	20.763	21.2856	22.1984	0	22.3418	21.4096	19.2309	20.5609	23.6944	0	21.9135	22.7146	21.1154	29.7637	21.3232	20.3268	30.1855	0	0	28.4078	0	20.1704	18.9366	22.1573	0	0	0	0	0	20.4986	0	20.5931	0	21.2424	19.8419	21.9949
22.0463	16.9749	0	18.0518	19.6088	26.0859	33.9654	30.5007	23.6971	25.0302	28.2679	0	23.0352	27.9482	25.8363	20.2299	23.3528	22.0323	23.3587	27.84	22.1446	0	23.3894	0	22.3737	0	25.7013	32.0069	22.6905	20.9922	32.2911	0	21.17	28.3357	0	19.4286	17.6747	20.9511	22.4209	29.7644	22.5249	20.0597	23.2216	21.6699	24.5872	22.5043	23.1921	22.4598	0	20.4345
28.4007	0	0	22.7277	23.8723	27.4005	38.171	31.9109	24.7332	26.0753	28.2028	0	23.1274	28.3349	27.8004	0	24.535	24.9366	24.9698	29.7433	22.8971	0	24.8722	0	25.3195	22.3054	0	33.2464	24.0088	22.7507	33.718	0	25.2722	28.1274	0	0	17.7357	25.0103	23.4564	27.6076	27.2236	0	26.5099	23.1618	23.6738	22.7667	22.2978	21.3628	0	20.3875
25.6813	19.9471	21.1078	0	22.5481	26.7044	34.9726	30.9556	24.2638	24.3946	27.386	0	22.485	27.8909	25.7611	0	25.392	26.7998	24.8167	26.8044	23.0093	22.9597	25.7474	24.3344	24.2053	21.7403	0	31.9677	25.3868	26.0077	32.1237	0	21.6343	28.5638	0	19.4592	18.4884	20.3197	23.3301	26.4006	23.4638	18.4534	23.484	21.1785	23.4583	22.1056	22.5827	20.9727	0	18.5819
20.2795	0	0	0	20.2497	26.3058	36.0165	30.6416	23.7941	23.6983	25.9805	0	22.2865	27.01	25.5532	0	23.0998	25.2054	22.7916	26.7733	21.3512	0	22.9738	26.8417	22.7126	0	24.5387	32.1545	25.7813	20.9024	32.2957	0	20.9237	28.0777	0	20.528	18.606	22.7127	20.2843	27.5473	23.92	20.1739	22.3863	21.5059	22.0994	20.1061	19.4274	22.7924	0	18.4575
21.1848	18.5659	22.0446	0	20.3748	24.4707	33.7575	27.7712	22.9844	22.7043	25.2161	24.4824	23.3659	28.098	27.248	0	22.8428	24.5773	24.044	26.9782	21.1784	19.2837	25.1595	0	22.0807	0	24.4597	29.6316	21.8906	0	29.6421	0	20.8617	28.6425	0	20.8529	16.625	20.6123	21.4942	27.9051	22.6664	19.39	22.5492	20.9034	23.1815	23.4546	20.9243	22.2806	19.7084	0
21.6891	18.5262	0	0	20.1216	24.3884	34.5466	28.7946	22.0183	21.7747	25.0294	0	23.4409	27.2229	24.9607	22.5796	21.1352	23.9961	23.3654	22.8092	23.2763	0	27.191	0	21.9364	0	0	30.2862	20.5798	0	30.3198	0	0	27.4144	0	19.4825	16.5652	20.3819	23.6255	26.4775	22.9334	0	20.4759	22.9306	22.3111	0	0	22.0849	20.9876	19.7154
20.0836	19.4933	0	0	19.6354	25.4078	34.4469	29.7339	23.4282	23.9922	25.7171	0	23.7287	25.1505	23.2944	0	22.9243	19.2259	22.8082	25.8044	0	22.8605	22.3786	0	22.1213	19.8555	28.3004	30.9804	22.0074	0	31.0259	0	18.9109	27.8022	0	23.392	17.0188	21.4292	0	23.339	24.339	22.7172	21.2388	18.8142	18.2121	25.9492	0	22.4983	19.415	0
27.2457	0	0	0	23.5968	26.288	38.1388	31.2393	24.8959	25.9538	25.7642	0	23.2416	27.9898	27.6184	0	24.9822	25.2867	24.5193	27.4774	24.8043	0	26.1116	0	24.4932	21.9708	0	32.3336	23.0142	0	32.6478	19.6414	25.8145	28.3619	0	18.8319	18.5851	23.4817	23.741	27.5368	27.2952	0	25.043	23.2844	23.602	0	0	23.3584	0	0
28.1793	0	0	0	24.6752	27.9837	37.7395	31.663	24.6908	25.8594	29.1269	0	23.6388	28.1906	27.6915	0	24.7925	25.2958	24.6347	28.7887	23.0875	0	24.1093	0	25.7422	0	0	32.9809	22.57	0	33.3135	0	26.0099	28.6378	0	0	0	24.3215	23.5176	27.4661	26.9543	0	26.2633	21.2533	22.823	21.7931	22.0126	0	0	20.6278
22.6103	0	0	0	19.5572	26.9844	34.2228	31.3513	24.1726	25.2192	26.7077	0	22.9115	24.5509	22.2491	0	23.6085	23.2332	23.566	23.6214	20.3084	20.874	25.7471	0	21.7949	0	0	32.6383	24.2138	0	33.0661	0	0	28.7281	0	19.68	18.1079	21.3816	0	24.1618	22.9902	0	0	20.6509	23.1637	0	0	20.9049	18.9741	0
24.6391	0	0	0	21.9638	27.3994	36.9796	31.8846	24.5617	25.8355	27.5583	0	23.6172	28.0413	26.9858	0	24.2574	25.578	24.0124	27.2041	24.1356	20.1787	26.3506	0	24.4523	21.3191	0	33.2606	23.711	0	33.734	20.7136	25.4978	28.6921	0	0	18.514	22.941	23.5547	26.4078	26.4303	0	24.3102	23.2398	22.0291	0	21.4257	21.069	0	0
25.0537	20.3459	0	0	24.169	29.5635	35.185	33.7736	26.4594	27.7551	28.2372	19.3828	23.0068	27.4994	26.7221	0	26.1778	26.6246	25.941	26.0292	22.1129	22.0862	25.0599	0	23.0751	22.7504	0	34.7877	26.426	22.0589	35.5493	0	25.4197	28.3044	0	19.2965	17.8537	21.6753	24.9346	26.2606	24.995	0	24.1531	22.4175	22.7236	0	20.2189	20.6309	0	20.656
25.3192	18.6928	22.2098	0	23.0478	25.4278	35.8765	29.7042	23.6311	23.8665	25.7624	0	23.1446	26.8941	26.8443	0	22.82	23.7452	22.9099	27.2676	23.8778	21.7735	25.5822	18.94	23.6303	21.6911	18.974	31.0285	22.2203	0	31.8622	0	23.94	27.9215	0	20.1523	19.2245	23.1762	22.8264	24.8006	24.9975	19.8042	23.6156	21.2817	23.0252	20.8377	21.6945	22.2824	19.9352	18.8744
24.2548	20.9385	0	0	22.8437	26.7597	34.2741	30.7001	23.7029	24.9531	26.1205	0	22.6908	27.1649	27.0914	21.0772	23.375	25.7985	23.9653	27.2434	23.9966	21.0953	24.1319	0	22.6451	21.1966	23.2535	32.6961	23.251	20.3499	32.5829	0	22.917	28.4474	0	21.8288	19.4032	23.671	22.3684	24.3401	23.3492	20.4517	22.7541	22.658	23.1325	23.1965	21.4082	22.637	20.634	20.0302
25.4105	19.9711	19.2024	0	19.8752	26.9723	33.9755	30.9166	23.8039	25.0667	26.5742	0	22.3653	24.4217	27.1999	0	23.6637	26.0488	23.3095	28.5191	23.9793	22.3556	26.3329	0	24.9171	21.2799	20.543	32.4358	23.2341	0	32.6584	0	20.9403	27.6806	19.5293	20.4216	17.7465	20.2544	24.9116	25.8372	23.0533	20.5391	22.5329	22.6881	21.4722	22.7216	0	22.2196	20.429	17.0507
29.0273	0	0	0	24.7223	28.2214	37.7064	32.4895	25.0987	26.0407	26.3907	23.0686	23.6591	27.361	27.4802	0	24.7511	24.6017	24.4468	30.7385	23.9181	20.9907	25.894	0	25.6072	22.4687	0	33.5728	24.7669	22.744	34.0727	20.7173	27.2904	28.6332	0	20.1391	19.2827	23.7141	22.9183	27.7486	28.437	16.8954	25.7815	22.5856	24.3129	20.9611	21.974	22.0884	0	20.4893
21.9397	0	0	0	0	25.8953	36.7784	30.5292	27.2557	25.4034	26.613	23.1593	22.8319	29.0588	25.1676	0	23.8598	25.1117	25.7225	26.7706	22.9072	22.5395	24.3573	0	23.4382	0	0	32.4104	24.823	23.7196	32.5986	21.0272	20.628	29.4309	0	0	0	22.347	22.7123	27.2006	28.0559	0	22.7245	21.8711	22.8884	0	23.2242	22.1579	19.4794	18.2526
27.252	0	0	0	23.5116	28.0536	38.3264	32.6539	25.2833	26.8525	27.3224	0	23.0283	27.9212	28.4751	0	24.9725	25.5323	24.7068	31.1243	23.897	21.4225	25.3518	0	25.1778	22.0224	0	34.2818	26.5843	22.5761	34.4264	0	27.8681	29.9345	0	18.6805	17.4471	24.4016	24.0482	27.5925	26.9966	0	25.7564	22.6335	24.2115	22.0038	0	21.7802	0	20.8413
25.3576	21.8966	22.5922	20.6384	22.9308	25.5707	34.3917	29.8879	22.515	23.9627	31.0818	0	23.5273	23.6926	25.3536	23.4378	22.7383	22.0071	22.1149	27.3435	21.13	24.9676	22.6799	19.3525	22.5761	24.127	24.8282	31.8144	21.2725	20.7472	31.7255	27.6232	22.9067	27.5353	0	22.1192	21.0209	21.5917	23.7586	23.963	22.7545	21.7645	23.3944	21.0811	20.6081	24.5087	19.7456	23.9163	18.8002	22.4066
25.7825	22.1943	22.326	22.6824	0	25.3867	36.8303	30.1012	22.8587	24.2632	31.4927	0	23.3981	23.1702	25.057	24.8227	22.4317	21.3169	22.2807	27.7973	0	24.9834	24.3875	25.5358	24.104	24.1586	22.9113	32.1906	21.4072	0	31.9185	19.8301	21.0616	25.9083	0	21.6083	20.7092	25.0806	21.1333	25.4809	24.2592	21.6451	23.2279	0	21.9046	26.685	0	24.2979	18.7352	21.1284
22.9176	0	17.2605	0	22.2943	22.9652	38.4073	28.5108	0	23.0306	26.1048	0	22.2742	28.1568	27.3659	0	22.3121	25.5533	0	27.3449	22.3468	22.3463	26.6039	0	23.7035	0	21.6547	30.7543	22.3779	0	30.3148	0	26.0489	29.1527	0	0	20.0725	24.2243	22.5144	26.7288	26.265	0	24.2434	22.2858	22.954	24.8297	21.0513	21.4346	0	20.1303
24.0887	20.6926	19.6538	0	20.7015	27.0745	36.4078	30.9458	23.9561	24.9373	27.013	0	22.6082	26.1163	25.3099	0	23.4895	23.5969	22.9867	26.6083	22.1122	24.5373	19.5702	0	22.9128	20.5144	23.9346	32.9456	22.6594	0	32.7262	0	20.5814	27.7487	0	22.5861	18.6006	22.0734	21.2879	23.4807	24.5685	21.5294	20.7408	21.0197	0	27.0396	0	22.2613	0	18.6206
21.4721	0	0	0	20.1927	26.7512	32.1201	31.1523	23.7556	24.5312	26.9644	22.4723	22.2882	28.4806	24.0408	0	23.3043	23.6349	22.6837	24.6753	23.6508	0	26.4172	0	23.0735	21.0292	20.3312	32.6801	23.3649	21.8038	32.7415	0	20.1757	29.6694	0	18.9177	18.8273	22.4672	22.162	25.0093	19.872	19.1901	19.8774	22.8845	21.2489	19.3443	19.316	21.382	0	0
24.8845	0	0	18.6326	23.5975	27.1199	37.572	31.7779	24.5687	25.1699	26.7107	0	23.034	26.6511	27.3944	0	24.1537	25.4567	23.7705	27.7197	23.1641	18.972	25.5304	0	23.3718	21.3806	0	33.3584	22.7779	0	33.2952	0	24.8759	29.3483	0	18.9398	17.8474	24.1184	23.0911	26.6508	25.7091	0	24.8395	22.6279	22.8256	21.1763	19.792	22.2201	0	19.5172
0	0	0	0	0	24.5414	29.3121	29.3571	21.5154	22.9367	24.8267	0	22.3412	23.5742	27.5865	0	21.8496	23.9184	21.9275	22.8654	22.5453	0	23.1641	0	20.2073	21.3568	0	30.7594	22.0937	0	30.8497	0	0	26.3903	0	20.5053	18.0167	19.9836	22.1622	23.1353	17.8025	0	0	20.8309	19.0768	0	0	20.4777	0	0
24.5067	20.3788	20.6659	20.6746	21.9099	26.6291	34.184	30.2617	24.7809	24.0249	27.3731	0	23.3045	27.8792	27.1977	21.242	23.0289	25.2366	24.0026	27.4365	22.2158	22.9356	26.4159	19.5228	24.0569	21.2096	0	32.3988	25.7574	24.4348	32.4614	21.019	22.7408	28.6576	0	19.9994	18.1579	21.7612	23.767	25.151	26.9357	0	22.904	22.3314	21.2514	21.4123	18.9459	21.1769	0	0
22.7147	21.4716	0	0	20.3206	27.5325	35.6455	32.0337	24.9581	25.7297	28.3614	19.7468	22.2063	28.5458	26.8769	0	24.5018	21.2607	24.3555	28.2611	22.4723	0	26.5861	0	23.3477	21.2211	0	33.7605	24.9743	21.0844	34.0359	0	23.9334	27.7584	0	19.3346	17.9538	23.0806	21.6809	25.6794	23.4853	20.0145	23.0351	21.8716	21.0929	21.5519	21.5418	21.6025	0	0
27.4249	20.6004	0	18.624	23.88	26.6816	35.7174	31.3398	24.1288	24.9545	28.4949	0	24.0693	27.5705	27.7237	20.3298	24.0255	25.9739	23.5531	28.9726	23.4756	21.6446	25.2952	0	24.3024	22.3859	22.6312	33.0956	22.3674	0	33.1872	18.9718	22.2488	27.9644	0	19.9473	20.2134	22.6353	23.953	24.662	24.3129	17.8858	23.1005	22.8416	22.0445	21.4374	20.1538	21.916	0	0
23.8436	19.8599	0	17.3764	19.5039	25.7982	35.5493	30.0197	23.051	23.7127	25.7667	0	22.6085	27.4779	27.6016	0	22.519	26.2401	22.6968	27.094	23.6586	0	25.8072	0	23.2508	21.1206	0	31.7758	24.0564	20.8697	31.685	21.7035	24.2749	28.8423	0	19.7315	17.0927	21.218	23.6853	25.5416	23.9425	0	20.2959	22.8713	21.288	22.4543	19.6326	21.98	0	18.7675
28.0784	19.5106	19.4203	0	22.7142	27.5551	38.327	31.794	24.251	25.3669	25.968	0	23.5671	26.5878	27.9679	0	23.957	26.8594	24.6834	28.9231	23.3215	21.6712	26.1576	0	25.2641	22.0025	0	33.5519	25.8515	20.6835	33.4276	0	26.4973	29.299	0	19.9075	20.7559	24.677	23.5666	27.6988	27.3352	0	25.547	22.0985	23.5082	21.2534	21.9333	21.7095	0	20.3225
Supp.Data6.Tab4 Patient representation by dlfq view of TPD_dis data
21.74036596	22.78515508	17.37024266	22.13484534	22.24266926	22.8861996	21.02274686	22.48286176	25.89063666	29.49833697	30.51186637	23.43934392	25.32926616	24.18901807	23.01455537	26.32286627	24.26564262	23.13122695	29.78007457	22.34391972	29.44321433	20.84937602	0	23.60382071	23.16087544	26.21750908	24.34135361	21.618773	23.52894752	26.68277639	22.37462085	23.96512221	26.28483441	21.24563712	26.34938172	02	03	26.79823564	23.32061894	22.87010232	04	20.51864383	21.22049549	24.03946607	21.95565845	23.61274788	24.56739034	31.50848713	23.67946831	20.75331602
24.6468	23.3467	19.7936	19.0541	24.4113	0	0	20.9907	27.6	36.4494	31.7511	24.4403	25.8031	26.0178	24.1093	30.562	26.3707	26.97	29.0873	25.1823	26.2786	23.5631	27.5644	25.1277	27.0166	23.9356	0	0	24.6456	26.9185	22.2354	25.2781	23.1765	21.0101	25.9898	0	0	26.4281	22.1901	23.4937	20.5236	24.0825	22.9072	0	20.6875	0	21.7616	33.3497	23.9294	23.1659
25.0699	19.1113	16.6748	20.1136	25.0364	0	0	19.2083	25.4005	31.1028	29.7358	23.8941	24.2503	25.3357	19.4594	24.6079	24.591	23.6594	27.1744	22.508	27.4244	19.2139	26.5411	24.614	25.481	27.5818	18.0139	0	24.8451	23.3026	21.5039	24.9091	22.9101	22.7549	22.798	20.8782	0	25.9412	23.075	21.1178	0	22.9147	21.4252	20.1635	21.0135	22.3579	22.6496	31.4494	23.4039	21.5205
25.3098	27.7169	21.09	0	25.7986	17.1527	16.9217	23.4046	29.3227	38.2159	33.6979	25.6844	25.8958	26.6242	24.4545	28.3343	28.2695	26.736	27.9118	25.2668	27.2817	23.6986	27.5391	28.4848	26.8812	26.6278	21.0509	0	26.3139	27.2691	25.4889	26.4411	25.1649	24.6176	31.2487	23.5973	0	25.6713	21.8598	24.7452	0	24.5985	25.5748	21.6765	19.9778	0	21.7422	34.7581	27.7375	23.5164
21.9324	25.4472	19.8036	22.8728	21.819	19.2849	22.5131	0	24.3991	34.7548	28.7158	23.3474	24.6467	24.101	19.3271	25.353	22.8505	21.9543	32.1445	23.0816	30.4383	22.6302	22.3253	21.3079	25.0147	28.9105	25.5811	23.4475	22.5553	22.5625	24.296	23.6215	26.8967	20.4709	27.338	22.2903	0	26.8186	25.595	0	0	22.693	23.637	24.0705	23.264	21.8628	26.3266	29.8247	22.0046	20.3849
22.6241	25.117	19.5248	22.4008	22.875	20.6213	21.8076	0	26.4603	32.9903	30.7364	22.8702	24.3668	23.6501	23.0772	26.7037	24.8893	25.5418	30.5276	23.2389	29.1476	22.7077	24.6218	23.4507	24.634	27.6684	22.0435	22.2012	23.4486	25.1503	22.3194	23.1953	26.6433	22.2904	26.3363	21.6382	18.3308	26.8314	23.7386	21.5042	17.0587	23.5029	21.8908	23.8673	21.8642	24.3547	23.2244	32.0359	22.7309	0
24.1072	20.5433	0	19.2842	24.4452	20.7957	0	23.4568	24.1783	33.2483	28.6958	24.1071	26.1596	20.9393	19.8441	24.2951	22.8927	25.4008	26.6302	24.2649	27.7073	23.6541	28.2083	24.6446	25.7563	24.0848	21.2697	21.1725	0	26.531	23.4596	22.9344	23.9721	21.298	25.0857	20.7159	0	23.1062	21.3847	23.0527	20.3724	23.0567	21.5778	21.1012	20.8566	23.2951	24.118	29.8754	20.9893	0
25.1547	26.6375	0	0	25.2594	0	0	23.137	28.3437	38.1123	32.7699	24.9253	26.2696	25.9328	24.4604	25.9233	27.1412	26.2731	27.5629	24.5573	27.0216	22.4768	26.0677	27.7869	26.4804	25.6708	0	23.5558	25.5062	26.795	25.8934	25.631	24.0811	22.8346	29.307	23.7233	18.5414	25.4297	0	25.7653	0	23.6177	24.6303	22.1022	20.6412	0	21.7242	34.0272	25.416	0
25.033	19.9505	23.3294	0	24.3418	0	19.6887	0	23.8432	37.7026	28.6334	24.1346	26.8259	0	21.2776	24.5743	22.7982	23.2101	25.5783	23.3855	25.8929	22.523	25.7564	27.737	25.8928	25.5761	20.5036	0	0	23.1902	23.8879	0	24.591	22.6207	28.107	22.7105	0	23.4586	20.4449	24.2734	0	23.3172	23.6286	0	20.992	0	0	30.5292	0	0
24.9666	26.263	20.4511	0	26.1747	0	0	23.3048	27.0104	37.7839	31.6972	24.4982	25.8714	24.3624	22.6356	26.8619	25.5158	25.0842	26.9519	24.1243	27.6281	22.3281	27.8863	27.418	25.7739	25.123	20.0788	0	24.3244	26.8797	25.8224	24.0216	24.246	23.0104	28.2251	22.2788	0	24.3569	20.7334	25.5353	18.6486	23.7798	24.0713	22.7047	19.5491	0	22.4425	33.079	26.5688	22.2935
22.4817	22.5997	19.8159	21.859	23.7747	22.9362	20.4388	21.7199	27.6675	33.0483	32.0138	23.2702	24.2109	25.0669	22.4454	27.1642	26.0076	24.8297	30.8354	24.021	29.6777	24.7916	26.1118	23.1753	25.5184	28.2735	22.2899	22.5176	25.0111	24.7488	21.053	25.0501	26.3598	20.8263	26.374	21.4364	22.8811	26.531	24.0791	23.1423	0	23.5183	22.5425	23.3392	21.4992	23.2191	23.5726	33.1161	25.6732	21.5833
26.3001	19.4115	17.1385	18.3409	27.1333	0	0	20.8981	24.9321	30.3711	29.9868	25.3425	26.6108	23.0188	21.1465	25.162	24.1222	23.0726	26.6092	23.1182	26.3261	21.9371	27.8324	24.7714	26.9071	23.8269	19.368	0	22.3901	28.3535	23.8629	22.0975	22.9076	24.6101	24.3127	22.5783	0	25.7043	0	27.8574	0	25.1028	22.1004	0	19.8182	0	21.8317	31.3061	22.8918	0
25.752	23.0496	19.5436	0	25.8438	19.7956	0	21.3294	28.918	34.4311	33.2608	26.1241	25.8346	26.5014	23.4716	29.0177	27.9501	26.5801	28.4115	25.3566	26.983	24.305	28.1921	25.6952	27.1643	25.7908	20.5714	0	26.1408	26.4518	24.6336	26.0579	24.4676	22.3848	27.2541	21.6133	19.0943	26.1388	21.1012	23.5616	18.4754	25.4582	21.6827	21.6959	20.2465	0	22.7962	34.7342	26.8261	22.4836
24.959	22.4922	20.8127	0	24.4566	0	0	0	27.2863	37.8908	32.1878	24.3032	25.4388	26.7578	24.2557	28.3967	26.5702	25.0489	28.1248	25.843	25.7075	25.0235	27.207	26.1847	25.8614	24.71	0	0	26.1266	26.8133	24.1784	26.1085	23.3272	22.3689	25.4473	22.824	22.0669	22.0201	0	24.6358	18.4087	23.6088	22.5194	0	22.2854	0	0	33.6156	28.5926	25.4731
24.1475	27.194	22.0534	20.7518	25.5573	0	19.3058	20.4197	25.8507	35.6731	29.3733	23.8649	24.4742	23.3231	21.1783	24.7727	24.1512	25.2221	28.0139	23.3025	28.3176	22.0316	27.144	25.9922	25.4699	25.3321	21.6869	0	22.9801	27.6017	24.3575	22.6895	24.4761	21.9361	28.9545	20.6049	0	24.6318	21.8515	23.7799	18.796	23.3928	24.6125	22.2041	21.949	23.2203	25.1095	30.9537	22.3856	21.9211
22.229	23.0274	0	21.9558	22.6553	22.3875	21.8731	0	25.0016	30.2634	29.6422	23.6638	23.9319	23.2368	20.4763	24.219	23.6891	25.9858	31.7036	23.0518	30.0872	20.6078	25.2415	22.7471	25.3646	29.7896	23.5773	24.5356	22.5373	24.3781	0	22.4429	26.8859	20.6281	25.1962	0	20.8513	26.0834	24.541	0	19.2035	22.4083	21.3449	24.1742	21.9804	25.2433	26.1912	30.67	22.2115	19.8265
24.8752	25.4734	18.919	0	25.8669	0	0	23.9362	27.5279	37.081	32.1154	25.2716	25.8315	25.2048	21.8321	26.4182	26.386	26.3123	27.2515	24.5122	27.5217	22.4788	27.6841	27.5254	26.8557	25.3331	19.6767	0	25.1474	27.1053	25.2167	24.5408	24.5819	23.4966	27.8337	22.9659	0	24.4979	0	25.0841	17.0729	24.4813	23.0968	22.323	20.4846	0	21.8809	33.5377	23.2059	0
23.5658	24.0716	19.1943	0	25.7954	0	0	22.3419	24.7185	30.013	28.7284	24.6433	24.489	23.4762	20.8293	25.3166	23.8218	23.6595	27.4336	23.302	28.6373	22.1966	24.5893	24.3824	25.6961	30.6781	23.6628	22.0366	22.4275	25.8731	23.5163	23.0449	26.6269	22.9958	25.1945	21.8902	0	26.1022	20.1683	25.3095	17.2663	23.0943	23.0413	23.6753	0	23.8567	21.6112	30.4983	23.7548	22.0851
24.8511	27.1079	21.0462	19.0346	25.5037	17.9566	0	21.8055	27.5727	37.5211	31.7462	25.1638	25.1375	24.8809	21.4767	25.0831	26.1596	25.5137	27.0188	24.2563	27.6515	23.3858	28.0203	25.1746	26.3904	25.4212	20.8361	0	24.712	26.9496	22.7138	24.2972	24.8693	23.3581	28.1815	21.6043	20.3344	24.6293	22.7385	24.1657	19.432	23.8727	24.1405	21.8447	21.2733	21.4641	23.4767	33.3479	22.423	0
23.6301	0	20.5057	19.2324	24.1543	0	0	0	27.0573	33.6872	31.157	25.5988	20.8253	24.3463	20.9767	26.4912	25.0305	24.4884	27.9081	24.1481	24.4828	21.492	25.1854	26.3564	27.0506	26.9082	19.2433	0	24.73	29.194	23.5667	25.1037	24.0835	22.6131	27.9246	0	0	27.5852	0	24.3281	20.176	22.2505	21.6891	0	0	26.4142	21.106	33.0684	24.5029	21.9531
25.8815	27.7102	21.5243	0	25.678	0	0	23.8162	28.1487	38.7787	31.8925	25.3055	26.0364	24.9929	24.0194	29.5751	26.0933	27.7709	26.8264	25.6414	27.4776	23.7434	27.543	28.3727	26.6408	26.0241	0	0	24.6703	26.8848	25.6512	23.7266	24.5465	24.2567	29.8992	23.2149	0	0	0	26.3974	19.3957	23.9263	26.1496	21.9291	0	0	22.571	33.8008	24.6239	21.0188
24.1007	24.6317	20.2951	20.735	25.3208	0	0	22.7116	28.1101	35.0765	31.8219	25.3217	25.0094	25.7395	24.0664	28.2913	26.7445	25.7298	28.6243	25.1707	28.4092	23.942	24.7929	26.4995	26.5793	26.1675	20.8938	0	25.712	26.171	24.8927	25.3315	25.3631	23.2064	27.2132	22.1463	0	25.1305	21.8432	24.2335	18.9382	25.4372	22.9653	22.7197	21.9536	24.9947	24.1714	33.3109	24.8833	21.6958
24.0608	26.3196	20.7948	19.6674	25.4531	19.9965	17.5602	0	24.1551	34.9208	28.6079	23.7051	25.1246	22.0563	18.1004	22.8217	23.5644	22.6192	25.3459	22.0451	27.9345	21.7747	26.4478	24.084	24.6592	25.7351	22.5966	21.6464	22.3884	26.4043	19.3114	21.2905	24.1557	23.3733	27.6267	0	19.9766	23.4084	25.0606	21.7377	0	22.3966	23.0647	21.0583	22.0294	21.3365	25.5548	30.0162	24.2808	23.3838
22.9331	23.9192	17.1532	22.0008	22.3167	20.8772	22.0308	20.8162	24.1658	31.037	28.6715	22.1986	26.5295	21.7563	21.2578	24.5381	22.2299	26.436	31.1927	23.7511	30.0189	19.4945	22.6468	21.7684	23.7638	29.1594	24.6468	23.0029	23.088	25.4242	22.5327	0	27.4481	21.1554	26.9222	0	0	27.1012	24.6057	22.2508	16.5479	21.594	20.823	23.8697	22.0838	24.2273	25.1572	29.9114	25.3878	0
25.1221	22.4263	19.9463	0	26.0874	19.1598	0	23.426	27.5302	37.4083	31.6927	23.0249	25.3992	25.1878	23.3777	26.501	26.0086	25.9016	26.5635	24.0109	26.7686	22.7474	27.4505	26.7933	25.398	24.1222	0	18.6886	25.1628	27.5575	24.6324	25.0556	23.8709	22.9701	26.315	23.3058	0	25.5671	0	25.8806	0	22.7305	22.628	0	20.9267	0	20.5742	33.3125	25.5345	22.8645
23.2458	25.2758	21.3317	22.0849	22.2634	22.1971	22.3981	20.5646	23.4672	37.0582	28.384	23.4501	25.4867	24.2276	19.7403	22.5732	22.8282	24.2253	31.3241	23.4355	30.2254	21.605	0	23.4577	24.9101	29.51	24.6391	23.0579	22.0017	23.6319	0	21.2352	27.0903	21.1416	28.774	0	0	27.7932	26.3663	22.1464	0	22.2949	23.0283	24.1842	22.8057	23.8928	24.7311	29.932	21.6968	0
24.2421	22.709	20.0592	19.2622	25.4741	0	0	22.4883	26.9882	35.0395	31.3252	25.3182	23.2894	24.154	24.0141	27.3293	24.9624	25.6732	28.0267	25.469	26.8181	24.1109	26.3656	26.6678	26.8362	27.2295	0	0	23.9549	28.2568	25.3301	24.1432	24.1555	22.7337	28.2052	23.258	22.4058	24.823	0	23.3906	0	24.5176	23.3354	22.8788	19.778	24.4301	22.6585	32.456	22.794	22.4754
24.0647	21.2341	18.1675	20.0257	23.7798	19.2878	0	21.9545	24.2251	32.5743	28.7565	24.888	22.1413	22.3442	19.9031	26.3649	22.6564	22.5432	29.2318	23.2059	28.2162	22.3443	27.4685	24.3127	26.0404	25.8248	20.7921	0	21.7055	25.8959	19.8664	20.6378	22.8173	22.6049	25.254	18.5563	0	26.7623	23.6614	0	16.2152	24.1801	21.0938	20.1939	21.5647	24.9695	24.5445	30.7752	20.3782	0
22.5301	0	22.3583	19.3225	25.7738	0	0	0	26.3803	36.3101	30.8022	24.7223	24.5227	23.3398	21.3738	26.1513	24.5629	22.7072	25.8962	23.2675	26.0266	22.3909	26.8108	24.3383	26.1218	28.6274	20.6929	0	23.4091	29.3707	24.9432	23.018	23.7871	24.0081	27.8445	22.1041	23.505	23.5995	0	0	20.4915	23.8195	23.0548	0	20.8681	23.3674	22.1857	32.302	23.9893	0
22.1172	24.6501	20.2846	0	25.4112	0	0	19.8299	22.8636	34.2709	29.257	21.0911	23.2044	22.517	21.109	25.8035	22.8676	23.0212	25.7483	23.8949	29.1802	21.494	24.8802	22.9403	22.7972	24.8187	22.1107	0	22.0726	26.8317	0	21.4363	24.1055	21.2604	26.9336	0	0	25.0974	21.0382	23.4878	0	19.5947	22.622	21.495	20.9163	26.0753	24.9973	30.6982	21.7979	0
24.0693	0	21.8285	18.6898	26.4115	0	0	20.6662	25.6126	37.0456	30.2093	23.2276	24.2586	23.0458	20.1261	25.5461	24.4695	21.9328	26.4125	22.9277	25.4937	21.4968	26.7908	26.1186	25.5642	27.3574	19.9828	0	22.7001	28.8682	23.0323	22.4812	23.4422	22.7055	26.7925	0	0	26.3566	19.692	23.5648	19.4502	22.8505	23.1991	0	19.572	26.4342	22.0297	31.7341	25.3828	21.6961
24.7833	25.3513	21.249	0	25.0005	0	0	24.385	27.1694	37.6665	31.9006	24.6276	26.9435	25.1278	22.3046	28.0147	25.7021	26.4779	26.4481	25.2112	27.0012	23.4853	25.9306	27.9671	26.0722	25.1155	26.9756	0	24.5522	26.878	24.5952	24.4859	24.5597	23.2299	29.4062	22.6751	20.9159	24.6877	0	25.1451	0	24.1897	23.4893	0	19.8077	0	21.5111	33.7627	26.1994	24.3114
22.1774	21.3916	17.4862	22.1411	24.0328	23.1751	20.8459	0	25.01	29.8136	29.7533	25.053	23.824	23.5042	21.2807	26.6031	24.6973	24.8078	30.0597	23.6725	30.4831	22.2646	23.502	22.5007	25.4748	29.596	21.0777	24.6436	23.006	24.4782	20.5269	23.1936	27.6083	21.3417	27.418	0	0	27.2867	25.7971	19.9532	17.4912	24.2053	21.321	23.8148	22.5567	23.8529	22.0691	31.1342	21.3053	0
24.9778	23.3807	22.9912	0	24.4507	0	0	22.5646	29.3708	38.7781	33.1443	23.9416	25.7891	26.9579	23.0451	28.7374	28.5132	24.7791	28.7623	25.2816	26.9593	24.3593	27.9928	27.4923	25.6514	26.3165	0	0	26.8995	26.9895	24.6887	26.5945	24.6996	23.913	27.2305	0	0	27.9108	23.7482	24.729	0	23.1259	23.1987	0	0	0	20.2005	34.7481	27.5808	24.3731
24.8848	27.8417	21.3368	0	25.7205	23.2607	0	22.9967	27.9561	37.5938	32.0242	25.5565	26.2236	25.1726	21.6019	29.5292	26.9684	27.2087	27.5148	24.6841	27.8062	23.1857	28.1185	28.1768	26.6596	26.5571	0	0	25.0852	27.3736	25.2535	24.5356	24.782	23.6215	28.3044	23.1945	0	24.7023	21.6709	25.1647	19.728	24.4804	24.5664	21.4299	19.8776	0	22.5451	33.6784	25.2932	22.2098
21.1083	21.0877	0	22.3888	20.7366	23.213	22.1257	0	24.3104	28.4471	28.9472	21.8479	24.086	24.6384	20.1069	24.1048	23.0725	22.7189	31.6534	22.4615	30.0647	20.2109	0	19.7995	22.8283	29.6376	22.6777	23.9657	22.313	25.2861	0	22.1365	27.2214	21.4739	24.8231	0	0	26.8255	24.6008	26.2968	16.4213	21.3222	20.5821	23.8845	22.8999	23.4084	25.2165	30.5394	21.3345	0
24.4454	25.7342	19.6979	0	25.2932	0	22.7513	25.0216	27.1802	35.9995	31.3102	24.5361	25.61	24.8747	22.9982	26.7234	25.7994	26.6369	27.3102	24.0974	28.1822	22.2195	26.5246	26.9257	26.6143	25.7151	22.3063	0	24.8114	26.6666	24.3565	24.8974	24.754	23.1417	27.6384	22.8317	21.993	25.0401	22.2704	24.2546	0	23.9625	23.526	22.9415	21.0121	23.9225	23.3054	32.9362	24.3611	20.2645
24.688	24.8228	20.6899	0	25.1696	0	0	22.4328	27.4139	37.1742	32.0644	24.8911	25.5272	26.1512	22.8686	27.2164	27.0064	25.8634	27.6238	25.7279	27.6339	22.5125	26.941	27.0142	25.9263	25.6988	0	0	25.4592	26.5468	25.3475	25.6233	24.3975	22.6941	26.9721	23.6325	0	23.7758	21.7194	24.1555	0	23.9237	22.4751	21.8229	20.0883	24.0455	20.8925	32.9498	24.8904	23.9443
24.7946	22.3746	19.7382	19.7482	24.6281	0	18.7079	0	22.4597	32.8124	27.3799	23.5654	21.7942	0	19.2324	23.6583	21.9448	23.3141	26.218	21.024	28.336	19.8096	25.3616	24.8635	23.7521	26.5471	21.6995	0	22.2673	27.3302	0	19.1011	24.8647	21.5456	25.9022	0	0	25.4049	19.6697	24.7315	16.8279	21.8288	21.4893	21.212	21.436	24.1471	25.1708	28.8731	21.0093	0
24.6205	23.6195	20.7772	0	24.5948	0	0	0	23.7782	38.0246	28.0355	23.8535	25.4491	0	0	24.9014	22.6512	23.8955	25.735	22.2175	26.9532	20.1154	27.4548	26.6088	24.8938	24.7598	0	0	21.2226	26.885	24.0217	26.8373	23.9413	21.6977	26.3562	20.9289	0	23.8533	23.9034	23.9345	0	23.3395	23.5407	0	20.8196	0	22.3235	29.927	21.3784	0
24.8694	24.0228	19.971	0	25.0564	0	0	20.6908	25.616	33.576	30.1899	23.878	24.3466	23.278	20.3086	24.8073	24.0901	24.4243	25.993	21.804	28.7659	20.9766	27.0838	24.4639	25.3586	24.1509	21.8325	0	23.1306	27.7385	24.0918	22.7828	22.7265	22.8724	28.8374	22.3266	19.8378	24.0965	22.9147	21.7634	0	22.9361	22.6746	21.7195	22.0328	22.6548	25.0696	31.1304	23.7891	0
25.3205	21.3215	18.6853	0	25.5107	0	0	18.8036	24.1454	35.5483	28.4299	24.8453	25.9945	22.6659	20.055	24.5212	21.6481	23.739	25.2938	23.4038	27.255	22.1468	28.4694	25.6559	25.9435	25.8967	0	0	23.1937	26.7318	24.2622	23.3862	22.9638	22.3693	26.6261	21.4873	0	22.5247	22.6534	22.7882	0	22.6352	22.5074	20.9603	20.4278	22.1758	22.2982	30.4018	22.0019	18.6055
21.8013	24.7851	20.4559	22.3561	23.8134	20.8619	20.9092	21.6941	24.2374	33.6214	28.8058	23.641	22.7382	22.4454	20.2584	24.5161	22.934	22.712	27.9103	22.4558	28.8744	21.1685	24.614	22.7326	25.2757	28.2908	22.9913	23.6312	24.8458	25.2772	23.4196	22.1052	25.6229	22.2631	25.173	22.0711	0	24.3502	24.5972	23.1792	0	22.4697	23.1032	23.9639	21.9218	25.5373	24.6329	30.3764	22.3223	0
24.043	26.5644	21.6245	18.6159	24.2727	0	0	25.3216	26.8623	36.631	31.2648	23.255	25.1064	24.0146	22.382	26.6664	25.0256	25.8109	27.1011	23.7094	28.6825	22.821	26.8488	24.7033	25.5907	25.1753	21.9687	0	23.8378	27.1371	23.9131	23.6435	24.3703	23.3831	29.3062	21.929	0	25.7323	23.3415	22.2284	19.8119	22.8873	23.9586	24.0613	21.6709	24.0291	25.169	32.3857	23.3325	21.0651
25.4051	25.8736	20.2011	0	26.0179	0	17.3911	20.6461	26.4735	35.0112	31.314	24.0992	25.4236	24.7335	22.1071	24.9432	25.5311	23.9644	27.3506	22.3962	26.3394	22.5343	28.4115	26.126	25.3524	24.0718	20.9464	0	24.5686	28.5393	25.9289	24.5813	23.5215	23.38	27.4266	22.7414	0	23.9396	23.4676	27.0065	0	24.633	24.848	21.8311	20.8065	24.1458	23.9988	32.7512	25.3683	0
25.0235	27.6974	21.1467	19.1197	24.841	20.3943	17.3593	22.2438	26.6943	37.0128	30.9322	23.4654	24.695	24.5077	21.5535	26.0735	25.0188	25.4485	27.1795	24.0134	27.852	22.1286	25.9005	26.1147	25.8694	26.3377	20.617	0	23.4266	27.5112	24.6153	23.8055	25.3485	22.971	29.5539	22.7864	0	25.5935	24.4226	22.8306	0	23.7902	25.2742	21.3446	20.6773	22.1222	23.9536	32.1129	24.2246	19.8818
24.7134	24.977	19.992	0	25.1694	0	0	25.0146	25.597	36.0517	30.1513	24.8216	25.3536	23.748	22.5422	25.4871	24.2206	25.767	26.5835	24.8006	27.8123	23.3166	27.0045	25.9923	26.2402	26.2722	20.1623	0	22.7388	28.2277	24.866	22.4502	24.8413	22.9995	26.7637	22.0327	18.6077	25.1625	21.4207	25.7608	18.7813	24.6755	23.4795	22.6938	20.4877	22.9395	23.1299	31.4177	23.919	0
25.0682	27.7228	21.751	21.5594	25.5406	0	0	23.1574	26.1269	38.2237	30.6571	24.042	26.2665	25.2045	22.6063	25.4463	25.2539	26.0253	26.6882	23.4881	27.3796	22.7396	26.8808	28.3484	26.5631	25.372	20.8428	0	24.494	27.1117	25.5869	24.7794	24.5598	23.3923	29.5838	23.5849	20.6889	25.0164	0	24.9494	18.9956	24.5456	25.2691	22.0405	0	0	23.1339	32.3981	23.1997	23.2134
25.0269	19.6932	22.2446	19.8715	24.3076	20.2621	18.8226	18.7857	23.9868	34.5793	28.5296	24.4879	27.5075	23.2549	21.1259	24.8346	23.3877	23.556	27.2311	23.2179	27.6266	22.6951	25.9926	27.9199	26.8258	25.0645	21.6323	0	22.7362	28.1566	24.7941	21.8724	24.4678	22.1872	31.1358	21.8908	0	24.1405	22.9771	21.9445	0	23.2927	25.0391	21.417	0	19.9304	24.6565	30.2122	22.8573	20.575
23.5293	25.0217	20.2342	0	24.7015	0	0	23.5243	29.9931	34.8336	34.246	24.7881	25.1155	27.4705	23.7942	28.1146	29.0434	25.9589	28.2223	24.4301	27.9264	23.606	26.6011	25.4086	25.816	25.8745	21.7515	0	27.191	26.5078	25.3716	26.9781	24.4579	22.3861	27.9065	21.4424	0	23.7584	23.2215	22.9352	0	24.5917	22.5559	20.4438	22.1569	24.3236	22.3075	35.2881	26.8974	26.1113
24.243	21.8824	22.1704	20.9136	24.2628	21.367	20.2232	19.8407	26.5403	35.3559	31.2287	25.7839	26.6884	23.5802	22.7532	25.5061	25.0545	24.5359	26.7665	23.9426	27.471	23.4893	26.8623	27.5217	26.7005	27.4053	20.3323	0	23.5628	28.1508	24.0164	24.5115	25.1713	23.0716	31.4581	21.7709	22.0291	23.6924	24.2001	22.6705	18.9344	24.5097	25.567	0	20.3009	22.2071	23.7525	32.7317	24.6391	21.5709
25.401	28.1694	21.843	19.314	25.9435	0	0	24.6376	27.1355	36.378	31.1244	25.2363	25.3657	24.5788	23.4234	27.2752	25.1212	26.6196	26.631	24.0342	27.3518	23.0429	27.0439	28.0571	26.3642	26.2859	21.1389	0	24.326	27.1247	26.2333	24.2346	25.1656	23.8004	28.9826	23.7557	0	24.272	22.1097	25.8953	19.9295	24.3728	25.2592	20.7951	20.6184	20.7754	21.7772	32.7152	22.2328	21.495
23.9633	20.4739	18.7532	20.4583	25.0168	0	16.6007	0	26.8594	34.2316	31.0869	25.1786	24.9943	24.2645	21.8919	25.2636	24.8955	23.6124	25.8445	22.6335	27.7024	22.5053	26.8948	25.0125	26.4179	27.547	21.3854	0	24.0873	28.2338	25.938	23.8536	24.5438	22.7713	27.8606	23.2839	0	24.3893	19.5599	24.9237	17.4027	25.1175	22.132	20.6003	20.893	22.3367	22.5567	32.6918	24.9208	21.3484
24.1713	27.6639	21.2392	20.3391	25.1864	0	0	0	24.0888	35.0028	28.4265	25.1155	23.8911	22.6023	20.7701	24.9909	22.8573	22.446	26.6724	22.4737	26.449	22.4722	27.3497	26.3187	26.5123	27.5385	20.264	0	21.905	27.9515	25.5973	23.169	24.0236	23.2283	29.0258	21.672	19.2601	24.9484	21.5193	25.3004	19.5337	24.8825	24.1353	20.3329	20.5333	25.2533	22.4116	30.3301	21.619	0
25.5968	27.8113	0	19.3804	26.5897	0	0	24.6728	27.2976	38.4295	31.6694	24.695	26.6054	25.2125	21.8229	26.9445	25.4194	27.866	26.3948	25.5672	26.929	23.2042	26.1866	28.2258	26.5826	25.7234	20.5598	0	25.1423	26.3948	24.6185	23.3324	23.7307	21.9712	28.1521	23.8669	0	25.9462	0	25.2063	0	23.3365	25.2361	21.5333	0	0	21.3093	32.5241	24.8247	23.8888
25.6371	28.2271	21.1346	0	24.5338	0	0	0	25.4331	35.6262	30.1334	24.876	25.5871	23.1392	20.7407	24.7911	24.5288	23.5239	25.4302	22.4542	26.3674	22.5469	27.0364	27.5179	26.3115	24.5789	21.2523	0	23.6258	25.4077	26.5776	22.7784	23.811	21.7421	31.6007	22.7664	18.4566	24.4602	22.2555	21.0645	0	24.6436	25.2185	0	20.007	0	22.5913	31.4215	23.9249	21.6143
25.0701	27.9409	21.9618	0	25.7721	0	0	23.4492	26.456	36.806	30.8693	24.5155	25.9783	23.7788	22.4676	26.6405	24.9951	28.9204	26.7694	24.1844	28.5032	22.3478	27.4803	27.1743	26.2682	26.7392	21.0372	0	23.4599	27.1977	24.7987	23.242	25.4011	23.5839	28.8088	23.313	0	22.4792	21.5678	25.0264	19.7736	24.4523	24.7981	22.0821	0	0	23.2715	32.2304	23.0944	0
25.5256	27.0502	19.7828	0	26	16.291	0	23.8006	28.094	37.5612	32.7768	25.8177	25.6789	25.9537	23.3768	27.1399	27.1617	26.5203	27.347	24.4754	27.0836	22.4873	27.5035	28.1385	27.0516	24.9286	19.8083	0	25.6964	27.6874	26.4861	25.6889	24.7573	24.1259	27.4575	23.3492	0	22.7729	21.186	25.5962	0	24.6259	24.6937	21.6372	20.7118	0	21.2366	34.1712	26.9747	25.0332
25.6617	20.5639	17.6495	21.4265	25.9453	0	0	0	28.5787	32.4324	33.0707	24.0421	24.5428	26.2627	23.6455	27.591	27.1571	24.0449	27.186	22.7496	26.1801	22.322	28.344	25.2203	25.6557	25.8927	0	0	25.9791	28.2098	26.0242	25.8345	22.9101	23.3666	24.7917	24.136	19.4434	24.8037	0	26.6513	15.6405	24.1585	21.4044	19.2258	19.8951	20.6885	22.3362	34.1988	26.7324	21.5771
25.8135	24.6708	19.9254	0	24.7984	0	0	0	24.8882	37.8109	29.2302	23.8843	26.1688	0	22.7147	27.6307	23.6229	27.8442	27.0329	26.6678	26.2667	23.2853	28.0107	26.9178	26.3199	24.4331	0	0	22.1509	27.6214	22.4992	0	22.7267	23.7627	28.0575	20.4317	0	24.7333	0	23.8396	0	23.494	23.8386	0	20.6489	0	21.0363	30.7557	22.331	0
24.8043	28.2056	21.0762	19.5485	25.8576	0	0	23.5207	27.5782	37.7218	31.8005	25.189	26.1466	23.8365	23.8604	27.0382	25.9633	26.5332	26.8328	25.2914	27.2774	23.3442	27.6891	28.6744	26.3708	26.3745	20.7919	0	24.5625	26.8041	25.984	24.6997	24.9323	23.8546	29.0082	22.4351	0	23.4703	22.3906	25.2884	19.0755	24.6816	25.6102	22.4171	20.6482	0	21.5352	33.6272	23.9998	20.8656
25.1202	29.1898	21.9294	19.8091	25.6367	0	0	22.955	26.8813	37.0412	30.9833	25.434	26.0705	23.863	25.0195	27.9852	24.9536	28.0024	27.571	26.5005	27.8823	23.4814	28.0572	27.8677	26.8007	26.0868	21.3928	0	24.1484	27.0438	25.9777	24.1125	25.651	23.8521	31.9806	21.9763	0	23.801	21.4602	25.1718	20.655	24.4551	25.7399	21.5373	20.5809	0	23.1005	33.0744	25.2077	21.1086
23.9968	0	22.3102	0	26.2438	0	22.043	0	25.5849	35.4981	30.7209	25.3068	25.1505	23.4915	21.9059	26.0655	24.3492	24.4961	27.8631	24.2353	25.1645	22.3764	27.3368	27.0556	26.4678	27.9286	20.5144	0	22.5855	28.4896	25.5764	23.688	22.7047	23.648	28.5499	22.9335	0	26.0865	23.0837	20.9926	0	23.0018	24.4086	0	0	24.7375	22.8943	31.7785	23.217	0
24.083	21.2337	20.1376	18.9429	23.6295	0	17.2522	0	26.5637	29.8954	30.9087	23.5156	28.2372	23.5407	21.5097	27.3341	24.8125	23.7008	27.5943	22.507	26.5989	22.8911	24.851	26.6856	25.2771	24.2003	22.6419	0	23.6809	27.0516	24.5591	23.4522	25.3092	21.6845	28.5044	22.0666	0	21.8657	22.0154	18.4678	20.2861	22.1094	21.6157	20.3232	21.0661	0	25.3919	32.4638	22.6127	0
24.9355	22.5477	20.2932	0	25.5506	0	0	0	23.9989	35.2779	28.6744	23.1734	23.8308	22.8474	20.0161	24.3048	22.8087	22.4979	24.1846	21.5903	26.5949	20.3366	26.8569	26.7207	24.3585	24.3578	20.1086	0	21.9602	26.818	24.0011	26.0657	22.4243	23.3471	28.0938	22.0006	0	22.8255	20.3665	24.0448	0	22.6388	22.1914	0	22.2577	21.962	23.2592	30.0699	23.045	21.2225
21.2974	23.4522	19.3818	21.9446	22.5007	22.4327	21.5833	0	26.4913	32.7361	30.7724	23.3495	24.8462	24.0086	20.9902	25.8884	25.3559	24.3237	31.0383	23.1013	30.3457	22.2643	22.7384	21.6987	24.6338	29.1709	23.9302	23.5742	23.91	24.8592	21.1824	23.5959	27.0352	21.8627	27.249	0	0	27.951	24.9946	22.1533	0	22.5604	21.5879	24.2048	22.5439	23.1571	25.0194	32.5066	22.707	21.5692
25.9578	23.725	19.7484	0	25.7196	20.7274	19.063	22.2673	26.8617	35.769	30.931	25.4254	26.614	23.5909	22.669	27.1566	24.8032	25.8671	27.8544	24.1624	27.0756	23.3517	27.8555	27.054	26.5482	24.9189	20.4226	0	23.3289	27.3348	23.58	24.5724	25.0791	24.0391	27.2161	21.3266	0	25.7242	20.1571	24.8035	17.0809	24.8449	22.7311	20.9493	20.0714	0	22.7677	32.4529	23.4281	0
24.9511	21.7212	20.7131	0	24.2112	22.4442	17.5747	20.1632	24.8139	35.5551	29.5023	23.6742	23.5152	23.1422	20.719	24.5933	23.8177	24.0143	26.8119	23.4185	28.3171	21.6213	26.6664	25.8294	25.3031	26.3554	23.2649	0	22.9164	26.7373	23.1439	22.7149	23.6067	22.4583	27.9598	21.4971	20.7179	25.2462	24.3899	24.596	20.315	23.5275	23.4246	21.2498	21.5939	22.896	24.4321	30.9872	22.5349	20.3024
24.5559	26.3261	21.8544	0	24.3117	22.316	0	24.5115	25.6531	37.6983	30.1572	23.4601	25.7393	25.6348	23.4597	27.0298	25.4506	25.9974	26.4581	24.5938	27.5876	23.4279	27.2818	27.3601	25.4283	24.732	21.5862	0	25.4083	26.7551	25.1353	25.3442	24.0327	24.4396	30.1654	23.4894	21.1735	24.2044	21.7516	24.8732	19.8432	24.5735	24.3314	21.8328	20.1713	0	22.9072	31.9305	22.6063	0
23.891	24.3025	19.9747	0	26.2173	0	0	0	24.3016	35.9046	28.6199	24.1073	24.3486	23.0473	18.9668	23.5793	23.0011	22.6794	25.8927	22.2777	27.6464	21.1545	28.9733	23.9222	25.3799	25.7753	21.4475	0	22.2382	27.945	23.4903	23.0806	24.486	22.1065	28.1028	19.6684	0	24.1499	23.4449	26.2499	0	24.1098	23.3606	21.6755	21.1532	20.5636	23.4922	30.2448	21.9389	0
24.9827	25.6442	20.4991	0	25.6527	0	0	24.2471	26.8798	37.6944	31.13	24.0589	25.5384	24.6019	21.7192	26.7525	25.5608	26.0593	26.0991	23.9358	27.1057	22.1343	27.0433	27.6852	25.7232	25.0494	0	0	24.5553	27.7503	25.9194	24.5652	23.7752	23.4908	28.6315	23.3865	0	21.7737	22.4855	25.1339	0	23.992	24.3235	22.0197	20.6606	0	21.5972	32.1483	24.2375	0
22.127	24.4199	21.0349	23.1321	22.9888	22.103	20.4872	22.2003	24.5144	34.5456	29.0561	23.8557	21.8941	25.9143	20.8607	24.5964	22.6065	24.0478	31.5154	23.4278	30.6663	21.6345	22.278	22.9846	25.5173	28.8088	22.8597	23.6568	24.0034	25.705	23.5976	23.5246	26.488	21.6709	25.5782	0	20.581	27.2033	23.6015	21.4139	0	23.1933	22.6105	24.5199	22.5459	25.3249	25.3218	30.5509	22.7344	0
22.5619	21.925	18.6317	19.632	23.0462	0	0	0	27.1079	30.0241	30.9242	22.1942	23.4664	24.282	22.7904	27.8589	25.5207	23.5484	28.7788	22.9293	29.4271	22.5913	24.1855	23.9045	24.0218	27.8525	21.8336	21.2664	24.4722	25.2327	20.4018	24.2816	26.1331	20.6892	25.8074	0	19.9376	24.2982	25.4898	0	19.1778	21.7348	22.0318	22.3944	23.3961	26.3907	23.3585	32.4146	22.579	0
26.7995	21.6676	18.9644	0	25.0918	0	0	0	26.1164	31.0309	31.3173	25.5484	24.086	23.7732	21.8529	25.9867	24.6119	23.4738	26.9568	23.5528	25.9756	23.1774	27.09	26.4675	27.5636	26.1121	20.7759	0	23.379	26.8684	25.3636	23.0749	22.753	20.566	25.4245	24.0306	0	24.8714	0	24.2921	0	23.8574	21.7905	0	19.7931	25.2341	22.4976	32.4649	25.2088	21.348
24.0214	25.0811	21.0035	0	24.734	0	0	22.0688	27.978	36.8291	32.387	24.5279	25.6652	26.0304	22.7265	27.2204	27.1028	25.6961	27.1208	25.3475	27.2787	23.1529	26.7687	26.7328	26.323	25.3919	21.1977	0	25.0143	25.9175	24.985	24.6719	24.5702	22.6424	26.7334	22.4798	0	26.0291	22.1628	24.7919	0	23.9162	23.7981	23.8209	20.3969	0	23.0132	33.6943	25.6468	22.7323
25.0664	24.6517	20.1267	0	25.0461	0	0	22.2759	26.8084	37.8845	31.5396	25.7325	25.9742	25.1545	22.7312	26.8054	25.6953	26.7844	26.5864	25.2456	26.3203	22.8493	28.2056	27.0086	26.7547	25.2929	18.9815	0	25.0909	27.9784	25.7876	24.827	22.6786	23.7464	28.0142	23.3643	0	24.5405	0	25.5715	16.8557	24.0756	23.6053	21.1221	19.5517	19.697	20.14	33.0797	26.1534	25.2339
23.3872	22.6927	19.6283	0	25.4263	0	22.5314	0	25.2148	35.4249	29.709	23.1771	23.8208	23.8341	21.5605	24.8429	23.8617	23.676	26.0882	22.1296	27.9975	22.1384	28.62	24.026	24.7102	26.4458	22.0386	0	23.1705	27.4604	24.154	22.6966	23.6402	22.9612	27.0903	21.3168	0	24.0312	22.7702	20.7326	0	23.6934	22.3466	20.8973	21.4947	22.3822	24.1367	31.0956	22.7814	0
24.2546	25.2421	0	0	25.7729	0	21.6774	23.9007	24.7299	37.4179	28.9365	24.4896	24.961	24.0287	21.9493	25.6068	22.4726	25.4885	26.0988	24.246	26.8234	22.3493	27.1542	26.7297	26.1506	26.2639	0	0	23.4507	27.7833	24.4949	23.1319	23.29	22.8489	27.8616	21.9939	0	25.6314	0	24.6832	0	22.3567	23.0791	23.2971	0	24.5964	23.0338	30.8588	24.146	22.4548
0	21.7921	0	23.15	23.5775	22.164	19.2708	0	24.77	32.3676	29.8967	22.9392	22.5751	22.4521	20.0315	25.0796	23.481	22.449	30.2821	22.9618	29.9966	22.5205	0	22.0876	25.1094	27.9485	24.2697	22.7351	22.1903	24.998	19.0821	22.9271	26.4456	21.256	24.9682	0	0	25.8937	22.322	22.0431	0	23.5339	21.8516	23.7527	22.886	25.2192	24.2942	31.1489	23.6935	20.9442
24.9823	25.0073	20.7857	20.6634	25.4773	0	0	22.8822	27.5017	36.566	31.9459	24.757	25.6507	25.0889	24.6325	28.4464	26.0175	26.1512	27.7727	25.1107	27.291	24.0764	28.3027	25.9487	25.9634	25.3884	0	0	25.0837	27.2792	25.4358	24.5146	23.7369	22.7026	26.8755	23.0687	0	24.2521	19.9239	24.3394	0	23.8011	23.4679	22.3953	20.5266	0	22.1307	33.5197	26.6349	23.4325
24.8141	27.7877	21.3718	0	25.6263	21.4252	0	0	24.0431	37.432	28.3695	22.4931	26.3542	0	20.6073	24.8631	22.5452	24.4966	25.909	23.1732	26.5034	21.5494	27.7588	25.9629	25.6908	24.2518	21.3178	0	0	26.367	23.2091	0	23.2692	21.1893	30.1918	22.707	0	25.9711	24.1963	0	0	22.8545	24.627	20.7642	21.2317	0	24.6955	29.6879	22.6565	21.168
24.064	25.1171	21.0083	19.4348	24.6259	22.9511	17.1809	22.8624	26.2027	36.383	30.455	23.3945	26.0744	23.8542	21.5329	25.8029	24.5665	23.8315	26.3677	23.1646	27.4811	21.5438	26.6123	26.7367	25.6402	25.7419	21.0001	0	23.5664	26.3079	23.8343	23.4753	24.9571	21.8927	27.2936	20.5411	0	26.7404	21.8214	22.0859	18.8294	23.3225	23.2674	21.6398	21.0002	0	23.7182	32.4001	22.9598	22.0051
21.8653	25.6251	20.4034	22.4814	23.5339	22.1249	21.6304	0	25.6438	34.7971	30.8959	23.9796	25.1005	24.2401	20.5598	25.5975	25.1437	25.5283	33.2343	23.515	29.5895	21.9262	23.6987	23.0743	24.9968	29.682	24.4748	24.123	23.4982	23.8796	0	23.8014	27.1116	21.0276	27.3022	0	16.482	27.3246	24.9299	20.8039	0	23.2922	24.0652	24.2611	22.5155	25.8092	24.9555	31.7207	22.7112	0
22.3139	21.6689	20.3529	19.5494	25.8001	21.3835	0	0	25.8518	33.9148	29.7897	23.5338	23.1585	23.3346	21.9784	26.001	23.7151	23.4695	26.2933	22.5192	28.8938	22.1652	26.054	21.5113	25.3603	28.1271	22.4441	0	23.4882	26.1224	20.5831	23.3072	24.5258	21.5734	30.0313	19.3708	20.8402	25.2396	23.9895	0	0	22.3855	21.857	0	23.1958	24.7047	25.9476	31.0753	23.1008	0
23.8497	22.4652	0	20.3536	26.0731	0	0	23.0751	27.2116	32.5236	32.2251	24.094	26.2824	26.6317	21.6413	27.4102	27.0789	25.2232	28.5011	23.5122	28.0462	23.079	24.7915	25.531	25.9389	23.5884	21.9659	0	26.003	26.6437	24.6232	25.838	24.5023	21.8057	26.7861	21.2226	18.9625	26.5546	21.7029	23.7511	16.7212	24.4661	21.4433	23.1783	20.1872	24.3499	21.2298	33.8056	25.0824	21.41
24.768	26.3331	21.3638	0	25.5077	0	0	23.8473	27.6781	37.2856	32.3984	24.6693	25.8244	26.537	22.3077	26.213	26.5058	26.0568	26.7599	24.0242	27.2474	21.1158	27.654	27.0356	25.7526	26.2003	19.9549	0	25.568	26.3399	25.9732	24.6421	23.5876	22.3649	27.7424	22.8662	21.7615	25.263	20.0015	26.5843	19.8845	23.7521	23.9346	21.5295	19.4988	0	22.8578	33.6012	24.6086	24.7075
24.8796	24.1155	0	0	25.1133	0	0	22.5429	28.1906	35.7481	32.6228	25.2466	26.5466	25.6967	23.33	28.0402	27.1046	26.4283	28.2002	25.1046	27.1048	23.246	27.1466	26.0019	27.2361	24.5014	0	0	25.7608	26.9454	24.8849	25.4267	24.1484	23.4975	27.5616	21.0861	23.7558	26.2804	20.4477	24.116	0	24.8061	22.9091	22.0027	19.9187	22.4159	22.8565	33.7026	26.7964	23.0383
23.3641	0	20.5852	19.5	25.0438	0	21.7763	20.2527	23.4397	33.5447	28.1632	25.4512	22.2007	0	19.4817	24.5272	22.4943	22.2294	27.1319	23.219	25.121	21.821	25.807	24.2248	26.7914	28.5918	19.2105	0	23.1382	29.2643	22.1556	0	23.2234	22.7182	27.2096	0	0	24.9742	0	23.1741	19.8129	23.7569	21.9658	23.7255	20.4219	27.2664	22.7114	29.4501	21.8715	20.5167
22.0134	20.5138	20.3236	22.9492	21.8386	0	20.9621	20.8622	27.5879	32.8606	32.2424	22.1499	24.6543	24.4298	23.3272	28.2967	25.8445	24.472	31.5916	24.3125	29.3819	24.1436	26.6268	22.7787	24.0903	28.7475	23.5288	23.0598	23.8477	25.0476	18.694	24.2679	27.8237	20.154	24.9902	0	17.4544	23.0532	22.2945	24.3179	0	22.3956	22.6956	22.6412	23.0046	25.0986	24.1242	33.5985	24.805	22.1732
24.3211	19.568	17.7871	0	23.326	0	0	18.5371	24.4806	30.444	28.729	23.9741	26.2147	23.6754	20.1954	26.0415	23.6689	22.3921	26.9508	22.1094	27.1571	22.0927	21.5779	25.3771	25.2079	23.8758	19.4431	0	22.1132	27.2162	22.5573	22.6726	24.5801	21.3675	23.6563	0	22.3061	23.9238	19.2649	0	0	23.2241	21.4084	21.0581	20.8775	19.9069	22.8561	30.4018	21.4954	19.7622
24.874	23.9537	20.2034	0	25.808	0	21.9133	24.0922	27.9371	37.0921	32.1956	25.5661	25.2688	24.9793	22.942	27.1255	26.7715	26.1144	27.1245	24.494	27.4314	23.0956	27.3926	26.9898	27.2896	24.9937	24.1063	0	25.1151	27.3208	26.3775	25.0355	24.3501	22.7955	25.9107	23.2805	20.8783	23.4189	21.6626	25.9948	0	24.2671	23.5479	21.9684	19.1276	0	22.5665	33.5186	24.5417	21.5297
23.6262	0	18.5213	0	25.5425	0	0	19.4063	24.7987	35.2668	29.3736	24.7739	25.4216	22.8196	20.2931	25.1953	23.9798	22.643	27.1894	23.4948	27.1362	21.8526	26.5939	26.3005	26.8544	24.8444	20.8432	0	22.9021	29.6705	24.548	22.7661	23.3556	22.3279	27.3464	22.9328	0	24.8386	0	26.4433	0	24.47	22.0181	0	19.3693	24.125	23.6977	30.9347	24.0003	0
23.8906	0	19.4382	19.2466	23.9077	0	0	20.9318	26.1967	32.3798	30.4302	22.5543	26.9407	23.4781	20.6122	25.2461	24.6737	22.2838	26.9925	21.7669	25.8652	21.7363	25.3755	23.4292	24.1499	25.8323	20.9793	0	23.4766	27.1203	22.5966	23.1215	24.6509	20.4969	25.8685	0	19.9095	22.2026	21.5307	0	0	22.0797	20.2505	21.7252	20.6088	0	22.6387	31.919	24.7328	19.8158
23.7174	26.2262	20.784	22.2236	22.6634	23.0885	22.2608	19.3963	24.2417	35.537	28.1681	23.958	25.8899	21.7731	19.0356	24.3582	23.0612	25.4504	32.4796	24.6216	30.4078	20.3004	22.9656	21.6383	24.3322	29.7721	23.5371	24.5171	22.7305	25.4299	0	21.3857	27.5793	21.5227	28.7622	0	0	26.6216	25.4116	22.6919	19.7942	23.6804	23.6912	24.126	22.48	23.9863	25.4597	29.8703	22.9099	20.284
25.4714	26.5278	20.469	0	26.0621	19.3212	0	23.2088	26.4525	38.4615	30.9622	25.4531	26.6371	25.2081	21.9036	27.2373	25.7966	26.0394	27.0397	24.7496	26.7752	23.4919	27.7029	27.3458	26.4413	25.1425	20.9944	0	23.9358	26.5134	24.8872	25.1227	24.3589	23.9206	28.0799	23.1764	21.3684	24.0503	21.2379	25.1912	0	25.01	24.4969	21.3887	0	0	22.0794	32.4319	25.1193	22.9413
22.5442	0	20.2506	20.1344	24.5352	23.4308	0	19.1858	24.8841	34.6014	29.862	23.5967	21.4331	23.7608	20.9388	26.6504	24.2999	23.922	28.8378	23.1612	28.8371	22.9478	26.0386	24.0359	25.0856	28.3985	22.21	19.0996	23.5497	25.5377	0	22.6425	25.4063	21.8157	25.781	0	0	26.1635	24.0085	0	0	22.736	21.3324	22.0993	22.3682	24.5399	23.7845	31.2371	22.5667	20.5988
25.6035	27.5457	20.0987	0	25.8078	0	0	23.446	28.4879	38.2945	32.4782	24.4311	25.9072	25.6701	22.2698	27.1632	26.4997	26.9081	26.9299	25.0979	26.7632	21.335	27.3334	28.2168	26.3287	26.1558	0	0	25.5323	27.1749	25.1088	25.3397	23.6188	24.2652	27.9094	23.6652	0	27.7896	0	25.8583	0	24.3863	25.2025	0	0	0	21.8613	33.9785	27.216	25.4389
21.8047	22.8367	21.5359	21.64	24.1247	22.8809	19.7303	22.8924	25.2897	31.4417	29.6889	24.0672	22.8424	23.0603	22.3975	26.4848	24.5601	25.6195	29.3212	23.9045	29.6175	21.6863	24.8618	23.8284	25.5368	27.3697	22.636	0	22.3858	25.1544	23.0179	22.8026	25.8979	21.1723	26.1364	21.663	0	26.6167	23.1959	23.2695	19.7651	23.9632	21.7057	23.5874	21.7772	25.567	25.766	30.7943	20.4118	0
26.1772	21.3377	0	0	26.7248	23.7431	0	22.2041	25.8281	33.1437	30.2364	24.9563	25.5811	23.6481	21.806	25.982	24.8363	24.4519	26.2955	23.3907	26.9088	22.5603	28.8068	26.1462	26.4592	24.2368	19.7252	0	23.6721	26.6892	26.2174	23.3037	21.9084	24.0027	26.6639	23.7777	0	24.1737	0	23.7589	17.3261	24.0507	22.5843	0	19.7904	20.0365	21.397	31.0605	23.9316	20.2818
24.4516	23.5886	18.8708	0	24.599	0	0	23.1636	28.2685	36.1128	32.487	24.4865	25.8242	26.645	23.1434	26.8371	27.2189	25.6303	27.6987	23.2453	27.3141	23.128	26.4071	26.6209	26.0145	24.6101	0	0	25.8451	26.0824	24.6264	25.807	24.6301	22.3075	25.917	21.1758	0	24.6789	21.0799	24.4753	0	24.1403	22.5519	22.2295	20.7561	0	23.0349	33.7988	26.1717	24.7286
25.666	25.4211	20.393	0	26.2906	0	22.511	23.6838	26.2867	36.5576	30.474	25.1892	25.4897	23.0714	22.8313	25.6878	24.8762	24.7447	26.0141	24.0252	26.8827	21.7963	28.6056	27.8339	26.5381	23.8612	0	0	23.2364	28.6496	26.3351	22.9617	23.6417	23.7644	27.403	23.8241	21.0568	23.4153	23.3466	27.4057	0	24.3884	23.9222	21.2325	19.7847	0	23.4045	32.1283	21.4784	0
20.8178	21.0248	17.0013	22.0397	22.2154	23.0039	22.059	20.1197	22.1631	30.2251	27.1543	21.1522	24.5123	23.5943	19.8246	23.1415	22.4217	21.8236	31.0753	21.1166	29.7826	16.7634	21.878	21.5788	22.5211	29.4307	24.242	23.1741	19.7579	24.5161	0	0	27.0398	19.0132	24.9144	0	19.3968	25.9356	24.4786	0	19.3659	21.1829	20.1068	23.8712	22.3005	23.3987	24.8548	28.0706	20.442	0
23.3978	25.0877	20.2662	21.6978	23.3412	21.3429	20.1251	21.4241	25.2631	35.2441	30.0101	24.1012	24.3264	23.2284	21.8382	25.9862	24.1809	25.4561	30.9929	23.6694	28.4094	21.2712	25.2512	24.6756	25.7059	27.932	22.9728	22.6384	22.6121	25.668	21.8893	22.5342	26.7244	22.1024	27.5368	20.7092	17.6697	27.4686	22.2116	21.9879	18.0137	23.3448	22.0788	23.6244	21.0554	23.9073	23.8909	31.5055	21.6213	0
25.0244	22.8385	0	0	24.6112	0	0	22.5152	27.6424	38.0331	31.821	25.7947	25.5141	25.2249	21.6959	26.5298	26.0248	25.4297	26.703	24.2039	27.2262	23.7875	27.922	25.3765	25.6434	24.6638	0	0	25.4515	26.8859	25.6032	25.2634	23.5889	23.6457	26.9587	23.286	0	22.8354	21.9757	24.1297	0	23.287	23.2115	0	21.5515	0	20.7712	33.4859	24.9939	22.2063
25.0678	21.6331	20.2184	0	25.9647	0	0	20.1997	29.6435	36.7151	33.9501	23.6586	25.384	27.4438	24.424	27.4396	28.2023	24.0925	27.3486	23.0698	26.7793	23.3743	27.1611	26.2451	25.9332	24.4986	20.5742	0	26.7275	28.2434	25.728	26.8726	23.6003	23.5199	25.5089	23.1969	0	24.8738	18.5802	26.4721	0	24.0761	22.9388	0	21.4865	0	21.7481	34.8006	26.9724	24.1619
23.3857	0	21.9872	19.7019	26.6374	0	0	24.1262	25.9562	36.8652	30.3941	23.9114	24.0794	24.1767	21.8728	26.234	24.267	23.4044	26.3906	22.506	26.7245	22.3712	26.837	24.7154	24.9545	27.9696	0	0	23.7034	28.7636	25.9312	24.572	23.5912	23.8943	28.1404	20.5055	19.3681	23.6779	20.7003	0	20.0882	24.0497	24.5167	0	20.5627	24.9068	22.0231	31.738	24.8412	20.9131
25.2911	26.0723	23.2773	0	24.6478	0	0	23.259	26.2133	39.5588	30.855	24.6247	26.2013	24.0864	22.4409	26.094	24.4804	26.4279	26.1163	25.473	26.6606	22.0249	28.0581	28.3015	27.2778	25.3231	0	0	24.5338	27.6431	23.7152	24.409	23.3948	23.425	29.1306	0	0	28.5312	0	25.2767	20.8856	23.5183	25.6154	0	20.9657	0	22.1947	32.5961	23.6391	0
23.1313	21.0663	18.519	19.8546	25.0951	19.9995	0	0	24.8609	31.2644	30.0611	24.393	23.3164	22.9461	19.3763	25.3538	23.5657	23.1425	25.9858	22.0302	28.2306	22.2948	25.8767	24.5829	25.2564	25.8443	21.3404	0	22.821	27.1691	23.3743	22.766	24.7839	22.697	24.8144	21.4563	17.7178	24.1674	23.7128	20.8141	0	24.2266	21.0808	19.9031	21.993	24.0109	23.8052	31.3677	23.2704	19.4815
23.5754	23.4723	18.7593	0	24.0056	0	0	23.4385	25.2568	33.5138	29.2337	24.4825	23.5872	22.7987	22.1583	25.9473	23.0695	25.74	29.8703	23.551	28.0616	22.5265	25.7055	25.7878	26.111	25.9703	21.9707	0	22.3104	25.3525	22.9987	23.0212	26.126	22.3266	27.4365	20.0876	20.9464	27.4311	23.1291	22.2921	18.6957	24.629	22.0233	23.6334	20.4695	22.8328	22.4178	30.8086	21.5491	0
22.7322	21.8081	18.1329	0	24.8058	0	23.2944	23.4083	26.8733	27.2735	31.7801	23.8017	25.6021	24.3481	22.2016	27.8331	25.4547	24.4671	28.2103	23.9154	28.3104	22.5236	0	24.6122	25.7579	30.6163	24.3489	22.6556	24.2779	24.1299	23.7404	23.547	25.5624	22.8837	23.9795	0	19.6798	26.6835	21.2394	24.394	0	22.7533	21.1731	23.0037	0	22.1335	22.6223	32.3671	26.0242	23.1504
24.8509	27.8106	19.8027	0	24.6636	0	0	22.3576	26.5134	38.1604	31.6723	24.0768	25.8967	24.0962	23.1174	25.6112	24.9188	26.7564	26.2064	24.7449	27.5888	21.1701	26.8752	26.5259	26.4155	25.7513	21.5076	0	24.3119	26.6231	25.543	23.9793	24.0976	23.1161	27.2646	22.7566	0	23.4072	21.137	26.1991	19.1988	22.2574	25.3515	21.9027	20.1174	0	23.6381	33.0314	25.4429	21.6529
22.0808	22.4684	20.5723	19.8003	24.773	20.453	0	0	24.3026	34.3095	28.9993	24.2375	21.7768	22.5251	20.098	25.2603	23.1956	22.4441	25.3279	22.1207	26.0919	21.9456	27.0909	25.2447	25.6126	28.1316	21.0574	0	22.1499	28.9048	23.6091	20.9727	24.4225	22.1412	27.324	22.0592	19.649	24.1022	23.221	20.8973	18.8497	24.6654	22.5798	20.6237	21.2099	24.9511	22.4263	30.8401	22.444	20.1016
23.9831	25.782	20.7331	20.9908	24.8492	21.1166	19.6267	0	25.0706	31.9291	28.9222	25.2481	22.3504	21.9641	20.5972	24.7571	23.4507	22.2545	27.6946	23.0917	26.9256	21.8289	25.6944	23.801	26.3476	29.5423	20.1432	23.9597	21.8439	27.5261	25.7228	22.09	24.2748	23.7489	25.0197	21.9599	0	24.7929	23.4159	24.6767	0	23.6058	22.311	23.8491	21.4827	25.2539	23.3589	30.5205	23.0621	0
24.5531	25.2213	19.8578	0	25.5605	0	0	23.2822	27.5327	36.5485	31.9722	23.7253	25.4696	24.7656	23.4963	27.2511	25.7171	26.4916	26.7661	24.7534	27.4518	22.4649	26.6882	27.072	25.6573	26.45	20.6504	0	24.7342	27.8727	24.9162	24.7819	24.393	23.0568	29.4089	22.5947	19.9604	24.7447	22.3306	24.7068	0	22.9212	24.1698	22.2454	20.1792	22.3686	22.7976	33.4792	25.6546	21.6201
26.0866	22.3924	19.621	0	26.0106	21.8063	0	0	25.4174	36.3499	29.8996	25.8048	26.3041	23.4165	22.8453	27.1997	24.4176	27.3473	28.0079	25.5292	26.8681	23.3977	29.0445	25.1619	26.6307	24.412	22.5039	0	22.7223	27.0195	20.7207	23.4054	22.7317	22.3752	27.4104	0	0	25.5765	0	21.8269	19.7022	23.3055	23.6784	0	19.5198	0	0	31.4884	22.7118	22.4151
25.417	26.3529	19.8664	0	26.0369	19.1382	0	23.9419	27.2499	36.9586	31.3851	25.4263	25.8374	25.3546	20.9068	26.7584	26.1314	26.8793	27.8952	23.4869	27.6563	22.5101	27.4721	26.7348	26.9611	26.247	0	0	25.0794	26.3996	25.4488	25.2594	24.3536	22.9133	27.5397	23.4617	0	25.2026	22.2726	25.8222	0	24.667	23.8511	22.256	21.0089	0	21.4461	33.2657	26.1089	22.8924
22.9538	24.2344	20.4344	20.4798	25.0948	0	16.1863	0	25.5069	36.9342	30.1365	24.3673	24.889	23.5863	22.4931	25.9192	25.337	23.674	26.673	23.7667	27.7213	22.8737	26.9736	24.813	24.7615	26.397	21.8677	0	23.6055	26.8709	23.7217	23.3976	23.4726	22.9047	27.289	22.4414	20.6192	23.4809	22.0225	20.9285	0	24.4756	23.3023	21.1002	21.6884	23.9868	23.5469	32.0369	23.8553	20.8589
23.438	22.4516	19.2672	22.3937	23.3692	23.4092	22.204	20.19	25.6527	31.9549	29.9284	23.4671	25.4009	23.1478	20.8618	25.8287	23.8097	24.738	31.1254	23.1041	29.8083	21.3917	24.3497	22.5458	25.0569	29.7475	22.4062	23.1182	22.7638	25.5403	20.6779	22.4561	27.3797	21.8386	26.5342	22.2199	18.5196	26.7925	24.0315	23.9116	19.2042	23.4152	21.4329	23.8591	22.4497	22.867	24.3135	31.2507	21.5946	0
25.181	26.7946	21.5942	19.6103	24.9345	21.7349	19.0401	22.9337	26.4866	36.9383	31.331	24.4099	25.8407	25.0067	22.6492	27.6759	25.5783	26.65	28.3872	24.8121	28.3577	23.2015	26.3822	26.276	26.0277	26.0724	22.0339	0	24.0695	26.61	25.5856	23.5338	24.9963	22.8216	29.4363	22.4067	18.5814	26.2441	22.4713	24.7723	21.0118	24.0942	24.4797	22.7631	21.6729	25.105	23.6021	32.1308	24.0217	21.8665
24.6888	22.0065	20.1121	23.0096	26.4023	0	21.7531	0	25.2735	32.4158	29.6338	23.3598	25.6308	23.5599	21.4721	25.5135	24.2382	23.6619	26.2145	21.9026	25.3542	21.6149	26.6476	22.6809	25.1668	24.5252	20.5172	0	23.3781	27.1117	21.6689	22.0759	22.2069	23.5006	26.6851	21.2815	18.8981	24.2456	0	0	0	23.8944	21.7247	21.2564	20.4452	0	23.722	31.3584	23.6863	21.0805
25.0953	24.8876	20.7088	19.2283	25.8664	0	0	24.9237	27.5431	36.7303	31.9621	25.0699	26.5028	24.6536	23.4783	26.8235	26.0781	26.2902	27.3889	24.5593	27.2154	23.3442	27.51	27.1357	26.6525	26.2931	18.7994	20.9907	24.4839	27.5521	25.5702	24.4013	24.2545	23.8691	28.1543	23.1521	0	24.722	23.257	25.9469	0	24.9564	23.0914	21.5672	20.0448	0	22.0325	33.3404	23.7727	0
24.7148	25.5083	21.6808	0	26.3383	20.1138	0	23.0689	29.1889	37.4584	33.6541	24.149	26.4767	27.0988	24.8949	27.3043	28.186	25.6383	27.693	25.5231	26.8274	23.323	27.7678	27.9513	25.5078	24.9073	0	0	26.7334	26.8999	24.4549	26.711	24.1052	22.8202	29.1378	23.145	0	0	0	26.0002	0	23.3652	24.4549	19.1868	20.3877	0	23.4367	34.943	26.4345	22.5487
24.878	25.6939	20.6105	19.0165	24.2502	0	0	23.0611	27.7514	33.3613	32.4961	24.7717	25.7706	25.641	23.2908	26.8395	26.6449	26.4413	27.8561	24.3484	27.7475	24.3412	27.9387	27.0197	26.4207	26.1596	20.7251	0	25.6295	26.3862	24.7636	25.7894	25.0635	22.8149	29.7867	22.1728	21.3384	25.0556	22.0179	24.4198	17.2883	25.3458	24.6718	22.6989	20.574	0	23.2528	34.0355	24.9766	21.4141
25.1704	25.047	23.0528	19.42	23.2554	0	19.8348	0	27.2931	39.3508	31.7634	24.112	26.127	24.6614	22.2487	27.8206	25.1751	25.0025	28.8337	25.7319	27.4947	24.2401	25.9614	26.7803	26.0075	25.5047	22.1086	0	24.1066	25.5139	23.4329	23.3967	24.6234	20.4	32.0927	0	0	24.9904	24.0447	22.9784	0	23.0673	25.6893	20.2788	20.7105	0	23.7914	33.0963	25.0264	0
23.0869	21.5944	17.117	22.5781	23.5277	24.0623	21.1145	21.2918	25.3393	29.0588	30.2563	23.5788	24.6564	23.0109	21.716	25.8769	23.8179	24.9367	29.5061	23.5189	30.2526	22.0702	25.0386	22.0483	24.8423	28.8135	23.8177	23.4532	23.6021	24.9493	19.8707	23.0399	26.3106	21.3068	26.7763	0	0	27.8283	24.3585	0	0	23.1109	21.4845	23.6452	22.7004	24.2616	24.0093	31.5044	23.7783	19.6357
22.6401	22.6826	18.7285	22.7331	21.6494	22.5307	22.5703	19.8171	23.2299	30.6798	27.7682	22.7042	24.1867	21.7209	19.6455	22.6797	22.1646	23.424	32.4207	22.4711	30.1645	20.1256	0	21.1148	24.044	29.3424	24.6813	24.2598	22.32	24.3153	18.3945	20.4962	27.1225	20.5018	26.8575	0	0	25.7533	23.8113	22.5944	0	22.7085	20.6728	24.2631	23.2523	24.6116	26.0979	29.3621	22.2464	0
24.8309	28.4054	21.7678	0	25.8775	0	0	24.0116	28.4353	37.6242	32.5665	24.2562	25.8636	25.8805	23.3601	27.724	26.8145	27.7764	27.3416	25.4234	27.7915	22.5304	28.0062	27.9282	25.7318	27.1893	0	0	25.8599	26.9727	25.8543	25.1429	25.5908	22.7062	28.6374	23.937	20.9128	27.2067	21.6826	25.4051	20.3433	24.5019	25.1364	22.2501	20.7967	0	22.5372	34.1541	25.4249	22.0285
21.4778	20.8	18.4869	22.0172	22.8513	23.3921	22.4087	20.17	27.7327	30.1177	31.9186	24.1739	25.2915	24.889	22.4437	28.0377	26.6968	23.8941	30.4921	23.3085	29.8251	22.1586	0	22.4752	25.9683	30.528	24.5207	23.42	24.6504	23.3036	19.4954	24.6055	26.8582	21.256	25.2732	0	18.6926	27.8277	25.4205	0	0	23.273	21.4259	24.6584	23.1973	23.7305	24.4054	32.9764	23.5502	22.0389
24.956	26.1279	21.8169	19.743	25.5998	0	0	21.8426	26.6767	36.3215	30.741	24.2853	25.0115	22.9067	22.3979	26.4641	24.1666	23.7467	26.7452	24.1867	25.1793	23.6147	26.6791	26.2801	25.875	27.245	19.3022	0	23.2097	28.3889	24.939	23.5013	23.6881	24.0953	27.6878	22.2757	24.7051	23.5584	22.2611	22.8852	19.7826	23.8583	23.7182	21.5261	20.1236	25.3403	21.4022	31.9644	25.1787	23.0754
24.0135	0	19.0402	19.7604	26.6257	0	0	0	27.1164	30.9344	30.8602	24.8526	25.1975	24.1046	23.1026	27.1202	25.0823	22.7878	26.9024	23.362	27.2516	22.7199	26.1222	24.7174	25.651	23.7452	19.3126	0	23.7943	29.378	24.3205	23.7601	23.5924	25.9442	25.7421	21.9615	21.2456	23.0083	18.7373	23.4199	0	24.5326	22.0563	0	19.6866	24.8382	23.2703	32.647	22.9165	0
24.9932	23.5351	18.6984	20.079	25.3138	0	0	22.726	26.7811	36.8027	31.2823	26.2092	26.2265	23.4472	22.3851	26.32	25.0572	26.7869	26.5582	25.4569	27.1344	22.2387	28.5092	26.221	27.0946	25.1953	21.2932	0	23.4048	27.0529	25.0032	23.676	24.1827	24.4419	27.7465	23.0384	0	23.4554	21.9092	25.9291	0	24.4092	22.8698	0	20.6202	19.8164	22.2687	32.6039	22.8558	21.14
21.5359	0	18.199	22.5045	23.1848	22.0367	21.2996	21.5737	24.9066	29.282	29.4445	23.8027	25.0248	22.7593	20.9207	25.8093	23.7835	22.8749	30.3091	22.7636	29.9109	20.4682	23.1341	22.4216	25.8956	29.1787	23.805	24.3537	22.1206	22.5499	20.3336	23.663	26.7291	19.961	25.2684	0	19.467	27.4171	23.5229	0	18.5832	22.5676	20.4911	24.0799	22.6455	25.5178	25.486	31.3684	21.565	0
24.9198	26.3793	19.9641	0	25.796	0	0	24.0296	27.5835	37.3274	32.2015	23.2271	24.121	25.2355	23.6915	28.0196	26.1216	26.9719	27.4637	24.3156	26.7262	22.8831	25.744	27.4823	25.0348	23.8774	0	0	24.6393	26.5796	25.1276	25.0049	23.8204	23.0258	28.1315	23.2504	0	25.2832	24.2959	24.8784	0	22.9373	23.5505	21.8211	0	0	21.9431	33.8162	25.0921	20.7557
24.4556	26.5055	20.5722	21.3568	25.7212	0	0	23.941	26.0874	37.2416	31.0053	25.4813	25.4775	24.4588	22.2057	26.3125	25.8843	26.3646	26.9166	24.7341	27.8425	22.4884	27.6168	27.4191	25.7411	25.6987	21.6248	0	24.4767	26.0898	24.6451	25.389	25.3025	23.172	28.1207	23.2928	18.9078	21.6822	23.607	23.893	0	25.4592	24.6588	21.1098	21.5794	24.6695	24.0672	32.6325	25.0387	23.5673
20.3879	21.7469	17.9771	22.6487	20.9672	22.2696	22.7111	0	25.9059	27.8781	30.6028	23.1159	24.1642	23.178	20.0753	26.5522	24.2458	23.0103	29.251	23.2924	30.2189	21.3229	22.7196	22.0175	24.0159	27.6533	23.9805	23.3462	23.2561	24.1713	0	22.8711	26.2666	20.9815	25.8436	0	0	27.8354	25.8549	23.5856	0	22.3098	21.5546	22.8675	23.2993	24.3554	26.1023	32.094	23.4932	19.2684
22.0474	24.4129	17.9425	22.8137	22.0153	23.4183	21.2332	19.8831	24.7059	29.6415	30.0128	22.0056	25.3249	22.9858	21.346	25.7605	24.0494	24.1935	32.9872	22.9282	30.7233	20.0161	0	20.8745	23.9115	29.2093	23.5883	23.7006	22.7695	24.2941	0	22.0262	27.2661	21.0654	25.8411	0	0	27.2648	25.4659	0	0	21.2318	22.1592	24.7525	22.5649	24.5889	24.9735	31.3225	23.085	0
23.3559	22.1232	21.3914	0	24.1777	0	0	22.7594	28.4345	36.0536	33.4246	26.2414	26.6142	26.1382	24.0692	26.4332	27.5561	26.7342	28.4268	25.394	26.9749	23.8496	26.535	27.3211	27.4286	24.9987	20.5081	22.2393	25.8767	26.2615	24.1326	25.7052	24.995	23.8557	31.0811	20.7856	0	27.7493	24.1927	25.131	0	25.4186	24.8611	21.8497	19.4717	0	23.5964	34.9961	27.9464	23.4506
22.3585	22.304	18.3959	22.2218	23.0596	21.9102	21.8033	23.3908	26.6646	32.2922	31.21	23.9075	24.7279	24.6887	22.3609	25.984	25.2026	26.0596	27.9516	23.7527	30.0431	22.0713	24.8945	23.8893	25.1324	27.2474	23.5953	22.4169	24.4265	24.7595	21.7182	24.6192	26.4871	22.4704	26.1512	0	22.2941	25.7283	25.2174	22.3942	18.7723	23.0668	21.8095	23.084	22.3154	23.8522	25.0029	32.5644	23.1363	22.1138
24.6583	24.0074	18.9684	0	24.2787	21.1104	0	0	25.626	31.4743	31.1663	23.4569	23.4232	24.3305	22.5794	26.1575	25.1477	26.0419	29.3395	24.7583	28.2	22.5662	24.2005	24.7524	25.2934	25.5721	21.9869	21.7495	24.4473	26.3285	0	24.1903	24.0289	20.8712	27.6326	0	18.5552	28.4037	22.2983	22.8777	0	23.7955	22.1737	22.8549	21.1256	24.203	25.096	32.408	24.3251	20.7602
24.793	21.4762	18.5522	19.3218	26.4557	0	18.3134	0	25.7648	34.8783	30.1475	23.9699	26.9667	23.4509	20.9269	25.3107	24.2513	22.6868	25.9884	23.1094	26.8309	21.1451	28.6097	23.648	25.7641	24.8187	21.0466	0	23.0027	27.7973	24.6386	22.6727	22.8709	23.0442	24.8063	22.0506	18.4854	23.9815	20.2968	24.191	0	22.8192	22.4276	20.8257	20.9207	0	24.8165	31.5214	22.591	0
25.3071	25.5549	21.4887	19.4072	24.9193	0	16.6791	22.7694	25.7115	36.2594	30.5269	24.1491	25.1937	23.4363	21.9169	26.0177	25.2496	27.0029	26.2913	24.6904	26.8631	21.3272	27.22	27.2197	25.9336	26.3596	19.5996	0	24.1903	27.8155	23.6322	24.2486	23.8311	21.8387	28.4249	21.5897	0	24.5954	0	25.5637	21.591	23.1294	24.731	21.6089	19.3508	23.2306	23.1191	32.1028	22.6517	0
20.4524	20.8156	21.5198	0	0	0	0	0	25.7096	33.3067	30.4075	19.4379	25.5375	23.322	24.8287	29.8505	24.7333	25.5449	28.9842	25.3849	25.3059	24.9337	21.0127	20.4827	18.778	23.2293	0	0	22.3728	21.6659	0	22.2539	23.3164	0	26.4385	0	0	21.6521	21.7265	0	0	0	22.6206	0	0	0	23.5856	31.7356	23.5849	0
23.5223	0	22.4985	20.5735	26.3258	0	0	0	23.9564	37.2577	27.9271	23.446	25.2324	22.7462	23.3416	25.7913	23.3092	24.5572	27.3172	24.0223	26.0746	23.2266	26.494	28.9775	26.8326	28.5066	0	0	22.5188	27.6198	23.9993	22.424	23.5108	23.0193	28.798	22.7573	0	26.328	0	24.2364	0	23.0242	24.1882	0	19.6399	25.1868	21.8985	29.7139	21.511	0
25.0463	23.1863	20.0231	0	25.7716	0	17.2444	21.9008	26.6692	35.3979	31.5098	25.8896	23.9082	23.8563	22.8675	27.0916	25.0374	25.0524	26.7688	24.4104	27.3366	22.6398	25.3426	27.1106	26.5257	25.0588	0	0	23.9505	27.9918	24.9102	23.8637	23.9914	24.4252	27.6312	23.4979	0	23.0952	0	26.9694	19.2124	25.0316	23.9654	0	20.2259	19.7491	22.3305	33.4482	25.7492	21.0989
20.9608	23.7303	20.1782	22.2461	22.578	21.8839	22.7862	20.9907	23.3428	29.9398	28.0011	23.1356	23.3252	23.4115	19.5313	25.1693	21.8943	23.5927	33.4795	22.7017	30.2112	20.9704	22.2808	22.4275	25.5987	29.6993	24.3128	23.3523	23.2679	24.0909	0	24.3594	27.0593	20.8072	25.0388	0	18.939	27.5615	24.325	0	18.9285	23.272	20.9811	23.7554	22.2783	26.3598	25.0759	28.6972	22.3992	0
25.7651	22.7685	19.2263	0	26.3784	0	0	20.6269	28.1384	34.8344	33.4043	24.7289	26.0773	26.1853	23.3047	27.196	27.2408	24.2287	27.498	24.6082	26.7639	23.6352	28.6979	26.211	26.3442	24.574	0	0	25.6387	28.4802	25.8653	25.3998	23.4212	24.0166	25.4546	22.8107	0	24.2008	0	26.1747	0	24.2953	22.7699	22.3936	20.3167	0	21.7804	34.3378	25.9238	21.8802
25.3433	24.3949	20.2504	0	24.7715	0	17.1607	22.8711	26.9299	36.5452	31.8065	25.1127	26.0688	25.1217	22.5707	27.251	26.2841	25.4823	27.7805	24.0984	27.8769	22.8039	26.5935	26.5794	25.867	24.7629	21.8615	0	24.9583	26.8204	23.6998	24.9986	24.3195	23.725	28.241	22.2753	19.1815	26.0451	23.594	24.7743	20.3158	22.8451	23.252	21.178	21.0324	0	21.8937	33.0516	24.9437	23.6124
24.0249	24.3139	24.3277	20.7525	23.9249	20.8473	20.2185	21.0579	26.3443	33.2736	30.4914	23.8896	25.6661	24.7986	21.7389	25.7686	24.5691	24.9717	29.6664	22.9829	27.4171	22.8325	24.7768	25.7932	26.0483	27.2162	21.9158	21.2199	25.2966	24.9663	22.6859	24.2103	24.7372	21.2489	28.2824	19.7268	0	27.2083	24.1065	21.3972	0	23.345	21.6975	23.8626	20.3507	22.3584	24.277	32.2792	23.0164	20.2991
0	22.5843	16.9241	22.1384	21.7047	22.7142	21.9267	0	22.7212	27.3625	27.2727	21.9692	24.4352	0	21.6038	25.7896	21.8788	22.0415	31.7071	22.0898	29.2568	21.0205	0	20.2229	23.1513	30.1201	23.6783	23.5767	24.3327	24.4557	18.9877	0	26.7186	19.8588	24.4232	0	0	26.7791	23.8786	25.3643	0	21.4334	20.0491	24.7424	22.2914	24.5299	24.279	29.1815	24.8475	0
24.8983	22.5823	0	0	25.2281	0	22.2631	0	25.2891	36.183	29.3161	24.5911	25.2629	21.1069	22.0935	27.168	23.2737	23.2672	28.9233	22.607	27.1083	22.0574	27.4196	25.1882	26.0887	25.3231	21.5995	0	21.6017	27.2066	25.1944	24.8007	25.0024	21.4493	26.8323	21.7951	19.671	25.3557	0	23.4025	0	24.2594	22.6231	22.242	19.9228	0	23.5546	30.2481	24.0856	20.42
24.4246	28.4362	20.8492	0	26.4593	0	0	22.7386	26.791	36.2001	30.7411	23.5597	25.0245	23.9096	22.9601	26.6573	25.0525	25.7892	27.0496	24.1234	26.7438	23.313	28.1765	27.38	25.5755	26.1028	21.0498	0	23.9712	28.1499	25.6598	24.4059	23.7054	23.6137	29.4778	23.5058	0	23.8846	23.8342	25.2847	19.5329	23.8162	25.4334	0	19.6363	24.2267	22.6318	31.8302	22.8966	0
23.0699	22.3515	20.1138	0	23.9886	19.4705	0	19.6132	26.0239	34.1449	30.7982	24.6136	25.2824	23.7501	23.249	28.5053	24.3113	27.0526	27.338	24.0898	27.7047	23.1297	27.2631	24.325	26.3704	24.8405	21.5975	0	23.7985	27.6965	23.0396	23.3665	24.4554	22.8662	26.0484	22.2901	0	26.2716	20.3204	22.8852	20.0764	24.8244	22.2974	20.9849	21.5953	21.9698	24.3952	32.0006	23.9993	21.4119
25.3071	23.6884	21.8538	0	26.701	19.8863	0	23.3584	28.3336	36.2618	31.8918	24.7237	25.0033	26.0542	24.5379	29.1885	26.1607	25.6541	28.4396	25.5049	26.2049	26.023	26.0279	26.696	25.2103	25.0232	0	0	24.3781	28.1772	24.9742	24.9211	23.705	23.4186	28.3493	23.4548	18.9788	24.2716	21.735	25.7876	0	24.2633	23.6219	21.9224	0	0	21.291	33.0705	25.7078	23.6663
24.9352	25.4055	19.0752	20.4222	26.2807	0	0	24.1683	28.027	37.037	32.4055	24.1479	26.2044	25.6595	23.7463	26.7597	26.443	26.3046	26.6818	24.447	27.2675	23.5217	27.0177	27.1135	25.196	24.8103	0	0	25.6687	27.4715	25.8951	25.5136	24.4102	23.6325	27.0214	23.0908	18.8751	23.8982	21.3796	25.4422	0	25.2338	23.6553	22.2742	0	0	0	33.4805	26.1517	24.5825
25.2921	26.2188	19.7096	18.3177	25.4885	0	0	23.7839	27.99	37.2025	32.136	23.9367	26.1577	25.483	23.2889	27.0621	25.9251	26.6424	26.536	24.8624	26.9979	21.708	27.0783	27.2121	26.3268	26.5298	21.1438	0	25.2431	27.483	25.4127	25.1628	23.9971	22.8519	28.2792	23.0966	22.0743	23.7575	0	25.2319	0	23.165	24.6013	21.9228	20.35	0	21.6509	33.7998	26.8946	22.4742
25.0491	23.3498	19.9176	0	25.4596	0	0	22.9055	29.3418	37.7901	33.6401	25.0173	25.5088	26.9399	25.0884	27.8281	28.2654	26.1287	27.6222	25.3164	26.3583	22.9517	28.0521	27.2537	26.413	24.3909	0	0	26.5757	27.0483	25.9067	26.5911	22.9357	23.4571	27.8859	23.3111	20.7522	24.5894	0	25.2533	0	23.5454	23.4214	0	19.87	0	21.5029	35.0011	26.1639	22.4484
25.0285	28.5609	21.9566	20.6019	26.0573	0	0	22.4755	27.0152	36.3462	31.9047	24.3962	26.0445	25.3786	22.5862	26.1193	25.672	26.9372	27.7474	25.1068	28.4857	22.7714	27.9576	28.2792	25.7884	27.1863	21.048	21.7631	25.2133	27.0677	24.6186	24.9151	25.1067	22.8688	30.0168	22.5782	19.1526	24.8727	22.6064	25.3487	21.1055	24.0235	25.9538	22.8711	20.0262	0	23.0793	33.2038	24.6893	24.6011
24.3491	22.0744	19.5098	22.4984	24.7439	20.7251	22.116	19.9166	25.2782	33.7456	29.9025	24.6325	26.4217	22.8877	20.852	26.3007	23.9878	24.8487	27.7438	23.9306	27.9597	22.8164	26.6676	24.7997	25.5798	25.8865	23.5851	22.3575	22.8678	26.677	25.6978	22.7842	23.9442	23.779	25.8894	22.9474	21.7307	23.5895	22.3175	25.0715	0	24.0637	22.492	22.0046	21.1698	22.1572	22.6103	31.1332	22.5244	19.8703
23.6571	0	18.9959	0	24.3586	21.5652	0	18.3802	24.2732	26.9904	28.7555	24.0008	27.6255	22.183	19.8615	24.6814	23.0134	21.8175	26.0438	21.1528	25.8683	19.4701	27.5057	19.6431	24.844	24.1471	19.8278	0	21.8643	27.3982	20.4904	21.6603	23.8228	22.0804	25.5742	19.246	0	23.8228	22.3226	0	18.9232	20.8575	21.1364	0	19.9219	0	21.4581	29.92	22.7935	21.1014
25.1765	26.0064	20.7281	0	25.7097	0	21.3338	24.5282	27.7286	38.5922	32.1704	24.3102	25.7308	25.8247	24.3274	27.6197	26.1535	26.9519	28.083	24.9777	27.6271	23.5748	27.5265	27.6693	26.4268	26.2773	0	0	24.434	26.6236	25.6044	24.979	24.3957	23.2593	27.6978	24.4632	0	26.0398	0	25.2676	0	24.2881	24.1033	22.1347	20.8408	0	21.0984	33.1575	23.4282	0
23.8505	21.5284	20.6294	19.7807	23.8929	0	20.1252	21.9	27.4907	31.7625	32.1517	24.2198	24.9975	25.2243	23.4787	29.632	25.7528	24.5034	29.2894	23.3856	27.9244	23.9128	26.7941	24.2269	25.5544	25.199	21.5082	0	24.7843	24.6665	19.7172	24.9272	24.6362	24.4548	25.6244	0	22.4435	26.4248	23.4524	23.8365	15.7686	23.6823	22.2854	22.3762	20.4036	17.7672	25.4585	33.0561	26.9046	25.0526
25.5817	22.2569	19.0055	19.5424	26.8172	0	0	21.0051	24.9591	33.7184	29.3058	24.8718	24.1911	23.1767	21.7228	25.7767	22.8745	24.3845	27.5274	24.0386	26.6417	21.8963	28.6191	26.337	26.7894	24.0604	0	0	22.3049	28.2223	23.1772	21.767	24.4812	23.8044	26.261	21.263	0	26.0876	0	22.7897	0	24.593	22.5663	21.3407	20.045	0	24.3408	30.9285	22.8591	0
23.1861	26.0474	19.8035	22.463	24.668	21.3466	20.4482	20.4874	24.6898	36.5239	30.0642	24.7403	24.07	23.748	22.549	26.2168	24.6241	27.6582	28.8491	25.1438	29.8546	21.9365	24.0062	25.0824	26.7847	27.0643	23.3224	0	23.3842	23.5758	22.1625	22.749	26.5043	20.9099	27.5332	21.7507	18.6495	25.6711	26.0142	21.9823	0	24.4145	23.7966	22.8115	22.5406	26.0247	24.0215	31.7717	23.7923	20.6455
20.892	21.8726	19.4097	22.4949	23.3636	21.9416	20.6283	20.5015	25.2783	30.7673	29.2337	23.3217	22.5268	23.0216	20.7793	24.9077	24.0209	23.3598	29.3506	22.812	30.0563	21.3602	22.2802	22.6516	24.8861	28.6772	22.0582	23.8264	23.2247	24.34	0	22.6943	26.6189	20.9316	25.4615	0	18.8493	26.2654	24.5748	0	18.2781	24.1513	21.4195	24.5972	22.8216	23.9753	25.1445	31.2032	22.2032	18.8978
24.6647	26.0289	20.1171	0	25.8682	0	0	23.6939	29.2337	36.0396	33.3924	25.9094	26.3809	26.3734	24.8195	29.5311	27.8092	27.111	28.9609	25.1268	27.5302	24.6453	26.2526	26.9552	26.6484	26.0805	20.6276	0	26.1321	27.0278	25.9527	26.1936	25.4197	23.3157	30.0924	22.4901	0	24.7501	21.9667	24.82	0	24.9369	23.7212	22.344	21.0308	0	21.4871	34.9235	27.3784	24.1886
25.1276	27.6738	20.8801	0	25.611	0	16.7801	23.5328	25.9525	36.9499	30.9942	24.4057	26.2039	24.2798	22.7709	25.9825	25.0589	27.1613	26.8029	23.85	27.3845	22.2442	27.9829	28.5086	26.3817	24.4897	19.7829	0	24.244	27.6079	25.8074	23.886	23.7995	24.322	29.9041	23.0309	21.6771	21.7447	22.3608	25.5089	18.2316	24.0888	25.5953	22.3103	20.112	0	22.5901	32.1292	23.8916	23.3501
22.1511	21.1812	19.8011	20.2176	25.9786	0	0	21.217	27.5065	33.5929	31.7651	25.2676	24.6352	24.8414	21.7481	25.8006	26.1755	24.7737	27.5437	23.6005	28.6812	22.9585	23.0526	24.1058	26.2005	28.4401	23.5873	20.8719	24.5804	26.2187	20.4629	24.2648	26.1723	24.112	26.4685	21.536	20.4994	25.1849	23.6158	0	17.6224	25.3015	21.6297	22.2561	22.9165	25.6914	23.333	33.2384	26.7159	26.5505
23.2385	23.954	19.1378	21.2921	23.792	24.7957	20.9289	0	26.3891	33.9012	31.5939	24.2412	24.3483	24.4103	20.3317	26.4209	25.4298	26.043	30.5245	24.1955	29.8287	21.7406	24.0748	22.1108	26.7805	29.7662	23.444	24.9391	23.936	24.3151	20.7985	23.7513	26.2395	19.7896	27.2812	0	0	27.2727	24.5473	21.4631	17.2427	22.9357	21.7549	23.7863	21.7134	24.7622	26.018	32.1337	22.9614	18.4497
24.1957	23.1181	20.5231	0	25.7708	0	0	20.5809	27.0284	35.6677	30.9949	25.8021	25.5474	25.3874	24.3968	28.4638	24.6623	27.5633	29.3227	26.1718	26.4433	23.5607	26.2863	27.4898	27.3542	24.3468	20.8571	0	25.1418	27.042	23.2038	25.0622	24.1116	23.3492	28.3075	22.1258	0	27.2955	20.2749	23.6813	18.6917	24.4964	23.4065	22.7666	0	24.0691	23.2473	32.5229	23.8862	0
24.839	26.9812	20.6913	0	25.767	0	16.1469	23.8754	26.7541	38.2078	31.2962	25.5203	26.2169	23.9692	22.4954	25.7413	25.8697	27.5776	26.6552	25.6833	27.1774	22.6921	27.634	27.7783	26.1193	26.242	21.775	0	24.2431	26.0507	24.2756	24.2851	24.9903	24.4258	28.4387	23.1849	0	24.0242	22.3313	25.8792	18.5357	24.3571	24.5408	22.269	20.2491	0	21.6438	32.8212	23.8301	0
23.9762	27.6003	21.8915	0	24.858	0	0	24.3838	27.9941	37.2794	32.1982	24.4093	25.7831	25.558	24.6918	26.6047	26.7826	28.2608	26.7246	24.8897	26.6395	22.015	26.7934	28.1506	25.1267	26.3089	0	0	25.1593	26.8272	25.798	25.2334	23.7422	22.215	29.4384	21.9341	0	29.554	22.0261	25.3718	0	24.2847	25.6139	21.8175	0	0	22.7075	33.8115	23.6292	20.0057
21.1849	22.7291	0	22.76	22.0793	21.2897	22.0084	20.4535	24.3955	31.4148	28.9297	21.262	25.0852	22.1138	20.0358	23.0741	22.5532	23.2727	30.2014	22.1362	30.5825	20.146	23.5761	21.6446	23.9262	28.4088	24.3129	22.678	21.8812	24.8094	0	22.7621	27.0239	19.6268	25.5693	0	0	25.9583	24.758	22.5692	16.2557	20.6633	21.4589	24.1526	22.3823	24.3522	24.8382	30.4963	25.0566	0
25.0063	26.414	20.3795	0	25.737	0	0	22.7342	28.3049	38.2266	32.6188	25.435	26.6267	25.9613	23.7484	26.8712	27.125	27.1975	27.5559	25.2269	26.8386	22.0503	27.8339	28.0991	26.1826	26.0258	19.3339	0	25.6459	27.29	25.2545	25.1766	24.3691	22.6889	29.2707	22.9499	0	24.0019	21.934	25.0575	0	24.6343	24.1566	21.3991	21.4626	0	20.7992	34.1722	26.992	23.9236
20.6919	24.6418	17.0789	23.0197	22.3906	23.1786	19.7302	0	22.959	34.6219	28.0074	23.7426	23.6879	20.3243	21.5875	24.8056	23.0124	25.9302	30.553	23.8871	30.2307	21.7903	21.6519	22.4281	24.8374	27.3467	22.2016	23.2035	19.1171	23.0151	19.0966	0	25.992	20.6391	26.936	0	0	28.485	22.0252	0	0	22.2795	22.6406	23.772	21.4986	26.6053	24.7661	29.4178	20.065	0
24.1854	25.6437	21.5121	20.9574	24.609	0	0	22.7893	29.1977	36.0206	33.3341	24.8208	25.4846	25.8025	23.1438	28.7888	27.0359	26.4684	28.4858	26.3541	27.3172	25.3559	26.6534	26.811	26.3902	25.7713	20.6688	0	25.2	26.8104	25.6834	25.5916	24.9048	23.5708	27.5632	22.3639	0	26.1991	22.0106	24.8954	19.5587	23.5251	23.8713	22.6703	19.9155	0	22.7938	34.6966	26.7429	24.994
24.8465	28.3918	21.8705	0	25.7748	0	0	24.3054	26.8388	38.2614	31.8721	23.8211	25.3634	24.7358	22.8097	25.7489	25.7945	27.6495	26.4146	24.1755	27.6226	21.5147	26.9376	27.9345	26.5628	24.6541	21.7455	0	24.4812	26.844	24.5916	23.9328	24.1467	22.749	29.3609	24.3589	0	23.2054	0	25.0862	19.8653	22.5914	25.829	22.2036	19.7992	0	21.8041	33.4473	22.6144	0
25.5343	23.133	18.7776	20.0628	25.5087	0	0	19.6469	25.0698	36.2493	29.3955	26.0284	24.3243	22.8724	23.3135	25.5102	23.5814	26.4805	26.4413	27.0261	25.7691	22.9257	26.8242	26.7328	27.1441	25.1208	20.2708	0	22.473	28.8297	23.9582	22.0298	23.2538	23.5185	28.1615	19.028	0	25.7153	0	25.2111	18.3391	23.2954	23.1537	0	20.019	23.3677	22.1096	31.2083	21.345	19.7007
24.6618	0	19.4144	19.3951	22.9893	0	0	0	24.1263	32.2827	28.6518	24.9947	27.9554	21.0423	18.6501	23.7165	22.3171	22.3008	29.5331	24.1508	26.1905	21.0175	23.5943	26.7026	26.2496	23.6349	0	21.5095	21.7535	27.8424	24.5665	0	24.5145	22.9312	25.4249	22.9072	17.0765	22.4701	17.6269	24.8876	0	22.5531	21.3197	20.2124	19.7095	0	22.3543	30.0208	18.7433	0
25.9477	22.7458	21.0956	19.6204	24.6624	20.2894	0	0	24.6071	34.0977	29.3071	25.1968	24.9447	22.377	21.1958	26.0947	23.5192	24.4987	26.7229	22.5722	26.6977	22.0506	26.0718	24.4275	25.8392	23.4727	20.1137	0	22.3849	23.8012	26.8121	22.7972	22.4284	22.0696	28.582	20.7999	0	24.8539	0	0	0	21.1756	22.851	21.4739	18.4624	21.9713	22.8017	30.6862	21.8374	0
23.4885	23.2388	20.4823	0	24.4482	19.0603	0	0	25.5477	29.9171	29.8568	23.9025	26.148	23.3664	21.4965	26.7096	24.4728	22.9625	27.5119	22.5524	27.2192	21.9647	25.2287	23.1497	25.0146	25.2969	20.5459	20.2035	23.7834	25.9228	22.2289	23.5497	24.7681	21.1892	26.3991	19.6141	0	26.9088	21.5628	24.8307	0	25.3744	22.9906	21.5628	21.5566	19.9321	22.6809	31.9072	22.6617	22.1221
25.3102	21.1258	18.3769	0	24.6715	0	0	0	25.1989	35.3148	29.5252	24.6099	23.9442	24.5065	19.1295	24.122	24.5169	23.0096	25.3552	22.322	25.6943	21.7117	27.4384	23.6068	25.4436	23.9366	20.8275	0	22.943	26.1897	25.6495	23.6428	23.1194	22.5188	28.0535	22.2982	0	23.7702	20.6353	0	0	23.7492	22.2159	0	20.5354	20.0534	22.3189	31.3306	22.6083	21.8436
24.2039	27.6099	22.0505	0	25.5223	0	0	23.8896	27.0392	37.8208	31.3246	24.9125	25.4883	24.97	22.6336	27.6164	25.6664	27.214	26.3425	24.9603	27.0685	22.4578	27.69	27.3112	27.1365	26.6424	19.9272	0	24.4342	27.1486	25.1929	24.5473	24.2656	23.2942	29.2329	23.4885	23.3727	25.7118	22.3538	24.4984	20.5641	23.6909	25.6813	21.5613	20.4645	0	23.5543	33.2128	24.2476	23.213
25.0511	27.8938	21.6445	0	26.0513	0	0	21.4381	27.6352	36.3845	32.0789	27.1022	26.9303	25.4201	22.4205	27.0287	26.6563	26.9361	27.585	24.6696	27.6367	22.9163	28.606	27.9027	27.5336	26.2515	18.8153	0	25.2977	27.5942	25.3855	24.9662	24.8339	23.1596	28.6549	23.1316	0	21.9013	24.2238	25.6188	20.2757	24.6747	24.5835	22.0881	19.6539	0	22.4906	33.8111	27.7708	24.7851
25.4008	24.1474	19.6852	0	25.5168	19.899	0	0	25.3186	38.524	30.403	24.4161	25.9364	23.2233	19.9167	26.6332	24.6679	25.5209	25.6015	24.1569	27.376	23.0195	29.1359	25.542	26.2713	25.7744	0	0	24.7517	27.6379	25.641	23.8544	24.0095	23.601	27.6544	23.5158	0	24.6882	22.292	25.6621	0	24.0579	22.998	0	0	19.7099	23.0864	31.8735	22.0915	22.5874
25.49	22.6704	19.5081	0	26.1012	0	0	20.7971	25.0134	36.9664	29.451	25.1466	26.3743	24.3636	21.9786	25.8607	23.6794	24.8446	26.534	23.6454	25.6545	22.9811	28.485	27.7246	25.9797	24.0763	0	0	22.3867	27.8432	25.0621	22.8276	23.328	24.5281	27.3372	23.5258	19.7855	24.185	0	26.0298	0	24.781	23.1133	20.5322	19.9558	17.8335	21.3285	30.9207	21.0638	19.3771
24.8535	26.1276	22.2975	0	24.4805	0	0	22.8145	25.8952	36.1798	30.232	24.9953	26.4751	24.5636	22.4367	25.0458	25.0845	25.8037	25.9975	23.8523	26.6948	22.3205	27.0107	26.6535	25.577	24.8318	21.1124	0	23.5224	26.2195	25.1766	24.3838	24.5213	22.9743	28.9334	23.1264	0	25.1075	0	25.1542	0	23.5644	24.4518	21.744	20.9581	0	22.5618	31.6126	24.6871	23.1944
25.5807	23.4926	20.109	0	25.6676	0	0	22.9731	26.3841	38.0203	30.9573	24.1442	25.7471	26.0451	21.7749	24.8124	26.5081	25.1216	26.1786	23.8316	27.2816	22.358	28.5985	23.6714	26.172	24.6838	0	0	25.7165	26.7841	25.2094	25.5929	22.6242	21.2071	26.8398	19.9456	0	25.4636	0	20.7613	0	23.0426	22.8947	22.8684	20.0567	22.1021	21.5282	32.3699	24.48	23.4638
25.217	21.6513	23.2626	20.5729	23.513	0	0	19.8835	28.55	35.8876	32.7723	24.4489	26.6675	25.418	23.6487	28.3294	26.7465	24.9917	27.5677	25.3216	26.4561	24.5662	24.4505	27.6095	25.6924	25.9311	20.7628	0	25.0931	22.1864	24.534	25.2704	24.858	23.3926	29.2348	22.1691	22.8433	25.2105	0	23.7283	0	23.9399	25.1137	0	19.4653	0	22.3432	34.0847	26.8025	25.0008
24.0223	20.5581	17.9384	18.6425	25.6126	0	0	0	25.0763	31.3095	28.9673	24.5943	22.8223	23.0166	19.0659	24.7506	24.0144	22.7938	25.815	22.565	27.6781	22.5853	26.5458	26.2896	25.3415	24.1874	21.8751	0	22.8524	23.6989	23.281	22.7632	22.4332	23.2581	25.1613	21.2167	0	23.2516	23.1367	22.3488	0	23.8562	22.236	20.4363	21.9816	19.9825	24.8162	30.6668	21.4844	19.4715
24.9718	28.9808	22.7507	19.2713	25.094	0	0	24.0067	28.3954	37.7654	32.6226	24.7936	27.1316	25.5306	25.0163	28.0739	26.8215	28.4635	26.7498	25.8429	28.1937	23.9223	28.0983	28.7879	26.2056	26.6746	25.2754	0	25.2719	26.8571	24.6049	24.9865	25.4078	23.3793	30.1813	22.2029	0	23.7326	0	25.5988	20.2991	24.022	25.6735	21.1737	20.412	0	22.1056	34.2326	25.3928	24.5189
24.5904	27.6769	23.0671	0	23.7781	0	19.1965	0	25.8865	38.1505	30.5787	23.3504	26.4814	23.9627	22.8553	25.6823	24.6993	23.1225	26.8059	23.9637	26.6849	22.815	27.0075	28.9325	25.3705	24.731	0	0	24.2148	26.3058	24.9206	23.6968	23.7846	22.7651	30.693	21.11	0	25.0961	23.6831	23.3269	0	23.4669	25.6268	20.6136	0	0	22.7896	31.9774	23.7068	0
25.8019	23.1991	19.5356	19.0476	25.8789	0	22.3462	0	28.0108	37.2996	32.1893	25.1607	26.3638	24.6551	22.3374	26.2763	26.053	25.69	26.8357	24.4411	27.1176	23.1278	27.5221	26.6965	25.9421	25.7902	0	0	24.4628	28.3159	25.3902	24.3825	23.9495	24.4524	27.5711	23.2702	20.666	21.8385	0	26.3795	0	24.0645	23.1911	19.6803	20.0684	20.1617	0	33.3119	25.3864	20.7991
21.8936	25.5965	19.8034	22.453	23.9509	22.4854	18.1439	22.4408	25.9166	34.6967	29.276	23.5792	23.0125	23.0937	20.714	25.6471	23.5791	23.2864	27.6222	22.8877	30.0156	21.3611	23.9922	24.7353	25.5311	25.7899	23.3683	21.1574	22.1848	23.9997	20.0571	22.7196	26.3092	21.8814	27.9069	20.9251	18.2939	27.0832	24.8592	0	0	22.6439	23.3761	22.936	22.7776	26.1572	24.902	30.7635	25.5537	23.1242
24.6875	25.5886	20.3607	19.7237	25.8278	20.6291	15.1263	23.6518	26.3356	36.3653	30.7726	25.2517	25.7845	24.1498	22.1941	26.1826	24.7806	26.4289	26.5348	23.8526	27.701	22.8703	27.9136	27.0695	26.0402	26.3529	20.9882	0	23.5018	26.8935	25.1447	22.5893	25.2799	23.3191	28.0514	23.1096	19.3476	24.4072	21.5919	24.5697	17.0403	25.0851	23.0577	21.6936	20.9364	19.8473	22.6314	32.3256	22.9501	20.0056
23.395	26.299	21.4961	19.4102	24.3581	20.2996	18.5469	21.5813	26.73	35.7576	30.9812	23.9954	25.7263	23.4551	22.2909	26.6667	24.9354	26.5295	26.7289	24.4764	27.2308	22.9101	26.7821	27.0788	25.2804	24.1422	21.8474	0	23.9575	27.1709	22.0046	23.5328	25.6677	23.4956	28.8486	0	0	25.0874	21.9452	22.6835	19.0112	24.2098	23.5856	22.4414	21.2689	20.0812	24.0862	32.5559	24.6478	22.6009
25.5771	22.3097	15.3136	0	26.0389	0	0	21.4407	27.4257	32.9613	31.2816	24.05	26.5478	25.3965	20.9469	25.0915	26.1151	24.8644	26.8938	23.4832	26.1745	20.8222	28.0085	22.2649	26.0721	25.3993	20.205	0	24.9713	26.3033	23.6529	24.9045	22.2967	23.9839	26.064	22.9015	0	24.7831	0	24.2942	19.0586	24.466	22.2165	0	19.7908	0	21.5808	32.6003	27.275	24.4705
23.4808	22.8999	18.0532	21.9119	23.2872	22.7964	21.9337	0	25.2512	30.0083	29.6705	24.0477	25.8558	22.6122	21.851	26.824	23.4494	24.8595	30.5771	23.8047	30.2182	22.3695	23.4132	21.9211	25.2637	29.4195	23.1748	23.3622	22.2616	24.6798	0	21.6208	27.9771	22.0371	26.292	0	0	26.0831	25.7944	20.1802	0	23.1665	21.0283	24.0959	22.4137	21.2966	25.4157	31.7827	25.0875	23.1768
25.6116	28.1906	20.9455	0	26.5431	0	0	21.9378	28.8981	37.1755	32.8469	24.3313	26.2519	26.3226	24.2595	28.3081	27.1734	27.2003	27.4229	24.5641	27.4985	23.472	28.4539	28.7074	25.8845	26.5361	20.6337	0	25.8325	27.0206	24.7926	25.5089	24.3401	22.8024	29.798	23.4071	0	0	22.826	26.1103	20.145	23.0058	26.1279	21.4772	20.1858	0	22.2927	33.7944	26.1915	21.7418
24.6819	23.2968	21.0396	0	26.1339	0	23.0538	0	26.8788	37.0009	31.196	23.9987	23.0133	24.025	19.5718	26.2201	25.2979	23.7876	26.1171	23.24	28.1507	22.5543	28.7609	22.7763	25.6134	25.4377	0	0	24.072	28.0828	24.8914	23.9047	24.6387	22.0305	27.3171	23.0401	0	25.2875	0	0	0	23.9103	23.4863	0	20.3215	20.1747	21.9739	33.0687	26.1021	22.399
23.0814	22.6034	0	19.9577	21.0288	19.9435	21.0869	22.2725	25.8818	29.2072	30.2766	25.2091	23.9739	23.3106	23.841	27.4213	24.2601	28.9331	32.0632	26.0038	28.5047	22.6102	0	23.1242	25.7153	29.9362	21.8968	23.4736	22.8451	24.4124	0	22.8912	25.5904	22.2156	26.1932	0	0	29.4467	21.7216	0	0	24.7353	20.918	24.1436	19.6591	24.4105	23.9279	31.5059	22.7828	18.6906
22.357	27.2432	22.1959	21.197	24.4908	23.3144	19.9247	20.826	23.9067	38.0262	29.4309	24.418	22.6778	25.765	20.7881	25.3793	23.5617	24.0311	26.8087	22.9999	29.2969	21.5208	25.8172	25.037	25.3884	26.8619	23.7456	0	23.2464	27.1399	22.381	0	26.5892	21.6304	29.0586	0	20.734	23.0195	22.6344	21.8922	0	23.955	24.7686	21.6997	22.9076	25.9093	25.1261	31.1526	21.3465	0
25.9073	25.3376	20.3298	19.2558	24.9042	0	22.2802	20.058	24.0592	36.4011	28.9663	25.1179	27.7394	22.3428	19.8312	24.5068	22.6768	24.4303	25.0559	23.0712	27.2893	21.6434	28.1027	24.9518	26.3893	24.7823	0	0	21.401	28.1172	23.1322	24.6794	22.4694	22.7192	27.9414	21.2304	0	23.967	0	26.704	0	23.8133	23.3037	0	21.3096	0	23.5909	30.8079	21.7937	0
24.6091	26.2805	21.9332	0	26.1101	20.9392	0	22.9451	28.291	38.1798	32.7069	24.8379	26.1854	25.4763	24.6582	27.417	26.3499	26.3626	27.1713	24.5496	27.1675	23.0648	26.1291	27.6719	26.4607	25.4155	0	0	24.8851	27.0621	25.6526	24.4756	23.9252	23.3544	29.7053	23.0627	20.8268	25.9888	0	26.4679	0	23.3554	24.7537	22.4597	20.9375	0	21.7849	34.0886	25.7496	21.9629
24.1245	28.0027	23.0844	21.5382	25.2516	0	18.6545	0	26.0411	38.4573	30.6866	25.2344	24.9763	0	21.6937	25.434	24.0383	26.646	29.2847	25.2254	28.4091	23.7209	27.1153	26.5397	26.6921	26.7983	20.5749	0	23.0071	26.7843	24.8655	21.2633	26.1574	23.2813	29.6477	21.985	21.9724	25.4177	26.3959	23.2735	21.1052	24.0343	26.6162	21.2763	21.5982	22.6033	25.5258	32.6859	23.8822	19.1327
21.9443	25.1137	0	21.0895	23.0599	21.3235	0	22.8224	28.5749	30.9323	33.5493	22.5033	27.3834	26.9647	25.5111	28.0221	27.307	25.161	28.3883	23.5601	26.404	23.3005	0	22.6901	22.9852	24.5797	21.2881	23.9411	26.5873	25.3844	23.0737	26.396	23.5065	0	25.6809	19.7457	0	27.8751	23.5165	19.7421	0	22.4158	22.4136	24.7821	20.3961	25.6778	22.2838	35.1196	26.2648	21.4895
25.3814	24.3108	22.1723	18.4045	25.0341	0	16.9191	0	27.27	36.2837	31.7681	25.0063	27.2885	24.8657	20.1846	25.6656	25.763	23.8394	25.8867	22.85	24.905	21.799	27.5815	25.3815	26.2224	25.434	21.2708	0	24.7483	25.3119	24.6365	24.725	23.1983	26.0635	31.2288	19.9808	0	24.0315	21.09	21.7159	0	22.8471	24.2445	0	19.7825	0	23.9955	33.3311	24.8959	21.1182
24.7683	26.7376	21.6797	0	26.0233	0	0	22.1665	28.3522	38.0508	32.55	25.1195	27.1185	26.1056	22.8071	27.2018	27.2412	26.4942	27.8499	25.1467	26.9131	23.3372	27.9837	27.9464	25.8608	25.0034	20.9739	0	25.9098	26.8149	24.4659	25.6403	23.8575	21.8	29.0385	23.4709	0	25.5257	0	25.3525	18.8276	23.3894	24.5784	21.6512	20.5899	0	23.8618	34.3971	24.576	22.9122
25.4717	25.4963	21.4421	19.962	25.7373	17.7468	0	22.2293	27.6341	35.7596	32.2115	26.633	26.2086	24.4855	25.0511	27.6658	26.269	29.0483	28.2052	26.0863	27.0619	24.4161	27.1222	27.8746	26.9107	25.5848	20.8972	0	24.505	28.2555	23.8817	24.4933	24.6197	24.505	29.1824	22.9799	0	26.0808	22.9234	23.4028	19.5277	25.3498	24.5186	22.5006	21.0399	22.028	23.2664	33.6434	24.398	20.5947
25.031	25.7919	19.7477	19.7597	26.0195	0	0	25.0027	29.0104	37.3728	33.1677	25.6491	25.9294	26.5754	24.3249	28.2083	27.3974	26.9482	28.1145	25.0667	27.9868	23.3664	27.2342	26.805	26.9993	26.1407	19.8597	0	26.1027	25.6638	25.2408	26.0443	25.2239	23.5668	27.3686	23.7058	0	23.62	21.5358	25.4366	0	24.1705	23.1191	22.4243	19.8298	0	21.8687	34.5512	27.0637	22.9293
24.1877	25.2185	19.5142	0	23.8703	0	20.0027	20.4998	24.7349	35.0917	28.9353	25.2567	25.1565	23.374	21.2482	24.4387	23.7908	26.3128	27.8541	24.5249	26.8917	21.9548	25.4401	27.8533	25.4707	25.4984	21.5689	20.783	23.16	25.4323	23.8921	23.0513	25.2866	21.1247	27.6903	23.4869	21.0296	28.1251	21.8794	24.1882	18.7525	25.8118	23.1836	23.233	21.3455	0	24.2632	30.3148	22.9533	20.1678
25.7092	23.1221	22.0093	0	24.4747	0	0	0	25.2775	38.2063	30.0518	25.7512	27.0891	23.673	22.426	25.9985	24.3008	24.6818	27.1897	24.2516	25.8652	23.26	25.5818	26.8485	26.6983	24.9947	23.4761	0	22.6186	26.3689	23.4809	24.2972	23.9087	23.5102	28.4522	22.8063	0	24.787	21.9574	24.9245	17.6581	24.212	24.0774	0	0	20.1901	23.3359	31.7701	22.6703	20.4453
22.4234	25.2353	20.3982	22.1529	24.3328	21.6826	19.4856	23.8157	27.0844	34.5884	31.6654	24.1466	24.3419	25.3095	22.7564	27.4444	25.926	25.6295	30.4854	24.4948	29.5141	22.5348	24.5023	26.3011	25.242	26.7311	23.5645	23.7618	24.835	25.4554	24.377	24.4611	26.3531	21.8154	26.7151	0	0	25.6677	24.0118	20.9766	0	24.3182	22.7723	23.1948	21.8217	24.8542	22.7398	33.4768	25.4231	22.9578
25.829	27.5226	19.0996	19.2008	25.9594	0	0	24.6815	29.0926	37.8943	34.068	25.8217	26.3097	26.7725	23.7533	27.847	27.7758	27.6215	27.427	25.398	27.4486	22.4673	26.7998	27.092	27.1571	25.7313	19.827	0	26.4922	27.2511	25.4486	26.4311	25.2706	24.4868	28.3737	22.9312	19.9516	0	23.4364	25.2416	0	24.1792	24.6103	21.7763	19.7114	0	22.1991	35.6065	26.5119	22.4141
25.9098	20.9421	20.6304	0	25.342	0	0	21.023	30.4036	35.0347	35.0638	22.6585	25.4565	28.0317	23.1975	26.8002	28.7013	24.4453	26.7705	23.6923	25.0777	24.101	27.6896	24.9147	25.1936	24.5104	0	0	27.3728	27.499	25.2191	27.5131	22.6874	22.9096	27.1479	23.2031	0	25.0465	22.0339	25.8049	0	23.2592	23.1107	0	21.4538	0	20.2544	36.5877	29.7231	29.125
22.3697	25.6905	20.7248	20.1335	23.7189	20.8318	18.3276	20.515	26.3695	35.3769	30.813	23.6618	25.0213	23.4214	21.6071	25.3466	24.5476	23.3654	28.2511	22.2131	30.5185	22.0223	24.9649	23.8986	24.6308	27.5999	22.9317	22.7403	22.8784	26.2528	21.6595	22.9342	27.1118	23.492	28.9647	0	0	25.3995	26.1703	22.1323	20.1254	22.9198	23.4721	22.4104	21.3718	22.2677	24.0806	31.9437	23.6879	20.5717
24.9321	26.2919	22.1386	0	24.9695	0	17.5234	23.6629	26.4997	37.1325	30.8209	25.4384	27.0991	24.3544	22.3107	26.1755	25.6117	24.3037	26.4205	24.1729	27.4752	22.3804	26.9621	27.577	27.0999	24.7211	21.1396	0	24.1924	25.3388	23.5163	24.0617	24.8859	23.6418	30.3691	21.6884	0	25.0106	21.077	22.6955	18.2392	24.4971	24.3	21.7176	20.512	0	24.1693	32.7783	22.3671	19.0608
23.5933	24.2114	23.8066	19.6006	26.2759	0	0	24.2969	27.1645	38.0658	30.1506	24.458	25.0659	24.5451	21.8764	26.3772	24.7796	23.5976	27.3275	24.2959	26.9027	23.0563	26.9904	27.5703	26.7345	26.4538	0	0	23.7232	28.628	25.5499	23.3713	24.4532	22.5811	28.563	20.2314	0	24.8977	22.2128	24.9447	20.5457	24.7046	24.5802	23.2516	19.3273	23.815	20.68	32.3435	24.0295	21.4313
25.9608	25.0321	19.1149	0	26.1391	0	0	24.7934	26.6412	36.1222	31.2913	25.5846	25.8168	24.2954	22.8477	27.5702	25.2947	26.8121	27.5894	25.0248	27.6622	23.0831	27.2453	26.5504	26.9842	25.3196	0	0	23.913	26.3722	25.6944	23.7392	23.1455	24.0531	27.7156	23.5368	0	23.3976	0	23.3394	0	23.297	21.2526	22.3244	20.1572	20.3223	22.561	32.8468	25.6665	23.0011
23.0201	22.4357	17.7013	21.4392	22.7517	21.4247	21.0506	0	25.5263	30.4937	29.447	22.9491	25.2871	22.7417	22.0254	25.5744	23.6187	23.9305	27.3918	22.9287	29.3419	22.1929	26.9952	23.9199	24.5856	27.2837	24.1082	22.2166	22.5339	26.2098	27.048	22.5829	25.324	22.5868	26.0819	23.2996	20.8407	25.8592	22.5007	24.3264	0	21.9598	21.2127	24.0901	21.0489	23.2741	24.2775	31.0394	23.5487	20.9741
24.7695	22.9002	19.496	19.4129	25.1181	0	0	0	26.7083	36.7613	31.022	24.7421	26.1267	24.8532	23.0679	26.8452	24.9832	24.9277	27.0031	24.0807	26.9401	23.0244	27.7475	26.3355	25.8956	26.1257	22.2647	22.4682	25.2511	27.2472	24.1342	25.1573	23.3219	23.8454	27.9523	22.8252	0	24.8558	21.0206	23.8451	0	23.4023	22.7044	20.2486	21.1474	21.4227	23.9716	32.7266	24.3085	22.0234
25.2981	27.4132	23.0231	0	25.6963	0	0	24.874	27.6149	38.0878	31.819	26.0196	26.4641	25.0653	23.4397	27.4809	26.306	27.9707	26.9876	25.1713	27.6176	22.7309	27.8929	28.3432	27.3492	26.3643	0	0	24.6848	26.5814	25.6646	24.5676	24.5099	24.1784	28.7315	24.186	0	25.4689	0	25.5851	0	24.208	24.9393	21.9152	0	0	21.8897	33.2973	26.8887	25.7386
24.7797	28.6514	19.7905	18.634	26.0176	0	0	23.7382	26.1758	33.6315	30.5308	24.643	23.7798	22.9726	20.8997	27.4399	24.324	25.3041	26.9099	23.5228	27.773	22.2409	27.7501	24.5924	25.8775	24.2999	19.8372	0	22.1415	25.4895	25.6848	22.8822	23.7694	23.4838	25.8031	22.7155	0	22.9721	23.5784	25.5068	20.0973	23.6754	23.1998	21.9365	21.1243	21.2685	22.0349	32.0176	23.8002	20.0429
23.1788	24.6436	17.5106	22.664	23.3539	21.698	21.9236	21.5008	26.9212	31.461	31.8016	23.167	25.2523	24.5793	22.89	26.8535	25.4256	26.117	31.917	23.9259	30.0946	22.8471	25.3883	24.3927	24.7792	29.0608	23.1285	23.6559	24.5675	25.8347	21.8352	24.2138	26.6785	21.2367	26.7515	0	0	27.8831	24.6118	21.4658	17.1093	23.2574	21.3563	24.0415	21.3324	24.2385	24.3544	32.7762	23.7497	20.554
25.2367	25.6411	21.9759	0	24.4869	0	20.8834	22.7948	26.0225	36.4666	29.8322	24.198	25.2384	24.0989	22.3925	25.7295	25.0926	25.5255	28.1476	22.5158	27.6406	23.0826	27.6291	27.7981	25.6757	25.9669	25.6193	25.2733	23.6732	23.9367	24.1279	24.7205	24.2083	24.0793	29.0839	22.228	0	26.1204	24.7411	26.0256	0	23.344	24.4133	22.3122	21.3187	0	24.6372	31.0009	23.8861	21.5267
23.9175	24.4033	0	0	24.4231	0	21.4782	0	25.8449	36.6192	32.0546	22.5598	24.4611	25.9192	22.6424	27.1013	25.4496	24.2819	27.719	24.4458	28.1137	24.7625	26.4752	22.0486	25.0571	24.6354	20.112	0	24.1889	24.9206	24.9131	23.9181	23.5338	19.3872	29.2596	21.8825	0	25.248	20.5976	0	0	23.2913	23.2976	0	20.517	23.1187	23.34	32.6465	26.422	25.5452
24.9979	21.4464	19.4756	0	26.6352	0	0	21.7346	26.0059	36.2865	30.7948	22.6399	25.83	24.0903	23.3424	26.3285	24.9272	24.2235	26.8969	23.8162	26.9893	21.6997	28.1431	26.7855	25.3476	24.8494	20.3609	0	23.1979	28.4895	23.6653	23.6316	24.7343	20.2983	26.1408	22.8967	0	25.4896	23.3088	26.1512	0	22.7058	22.992	22.7743	20.7115	0	22.8579	31.8483	23.4597	0
22.5832	21.8378	19.2	20.2018	25.1986	20.3656	18.4708	21.8698	27.1036	34.5515	31.5826	23.7608	24.2776	24.5178	20.9101	28.6732	25.1823	25.8363	28.5692	23.5506	27.797	22.5534	27.0534	22.0572	24.6476	26.2003	21.0056	0	24.3039	27.0491	21.0087	24.2395	25.3449	22.9457	26.9117	21.6043	21.2598	27.1908	21.2692	21.2103	17.364	22.6965	22.3898	21.3902	21.7616	22.7767	22.3932	32.8568	27.0479	23.3662
21.8625	25.389	20.8924	22.496	23.2933	20.8986	21.4617	0	25.3153	34.9861	29.3927	24.8627	22.9458	23.2789	20.5225	25.5156	25.099	25.8471	31.3069	23.2729	30.1916	22.5225	22.7564	22.7712	25.4642	28.6962	24.4919	24.2772	23.7276	25.4236	24.1461	23.3856	27.1973	21.4018	27.6068	0	0	25.8782	25.3601	23.5142	0	23.1365	23.4262	23.3836	22.66	24.878	25.7034	31.2249	21.8565	0
23.3805	25.3352	20.5904	18.9899	25.3523	0	0	0	22.3351	35.8757	26.3101	23.0862	26.0746	24.5268	21.0095	25.4837	22.442	23.7815	25.9955	23.003	29.0588	20.2103	27.3421	24.8059	26.0333	24.7331	19.4921	0	23.4015	26.6787	21.5222	26.5876	24.96	22.8986	27.3192	0	0	24.1202	22.91	0	0	21.4637	22.9892	20.8079	21.6853	23.1318	23.2216	28.3499	24.2815	0
24.9668	0	18.3871	19.7128	24.5185	0	0	22.1868	26.1543	28.7002	30.5618	23.8141	21.9356	23.5366	21.3463	25.7254	24.5512	23.3747	27.0831	22.7191	25.5006	20.7179	24.3881	24.318	25.2915	28.7283	20.0765	0	23.4975	27.7681	24.2889	23.3525	25.1173	23.5491	26.482	19.2402	0	24.0695	18.6147	22.6901	17.6078	22.4765	21.4097	0	19.4749	27.3018	22.0277	32.194	22.1209	20.8149
25.025	27.2686	20.8843	0	26.0035	0	0	24.3123	27.1856	37.7628	31.8979	25.3519	26.963	24.8506	23.4618	27.3954	26.2421	27.7542	27.3151	25.1569	27.2433	22.9289	28.3954	27.8992	26.4338	26.1356	20.972	0	24.6552	26.3452	25.8779	24.5569	25.0928	24.1383	28.8373	22.9008	0	24.1251	21.1565	25.3714	18.4067	25.0551	24.4516	21.4804	19.8408	0	22.5122	33.2493	25.5805	20.4692
25.7607	21.3777	19.46	0	26.4277	0	0	19.6342	28.8735	34.7466	32.8038	23.9428	24.3893	25.7644	22.8988	26.7206	26.4584	23.5778	27.0865	24.3574	25.9385	22.9479	28.4486	25.832	26.3618	23.6516	0	0	25.4249	28.5983	25.4307	25.1842	22.4977	23.3031	25.7443	23.0103	21.4287	25.7455	0	27.8597	0	23.8222	23.2746	21.101	0	22.4548	22.6588	33.8305	25.2715	21.2772
25.6	27.3565	22.2398	0	25.8241	0	0	22.6071	27.7695	38.4777	31.8257	26.1027	26.2035	25.0251	22.857	27.5172	25.675	27.7252	28.7447	25.7969	27.7908	20.6263	27.6847	28.3841	27.7303	26.6553	19.0718	21.6944	24.1225	27.1694	25.713	24.2645	24.4189	24.6558	28.5108	23.2221	0	27.5314	24.6363	26.0816	0	24.8721	24.9504	20.3466	0	0	21.7932	33.246	24.3066	0
21.3122	23.6095	18.9094	22.2727	22.7607	23.4606	22.5569	19.7777	23.456	33.1272	27.7706	23.6069	25.2952	22.3371	19.1194	23.4007	22.3717	23.4531	32.0423	22.6027	30.2705	20.8654	22.6233	22.1659	24.8615	30.0227	24.1301	24.0755	21.9087	25.0056	19.6838	0	28.3051	22.355	26.9069	0	19.9519	27.0866	25.5165	21.6441	17.7543	23.4174	21.2909	24.4079	22.145	24.3803	25.8479	29.5766	21.0153	0
25.0324	24.1785	21.6467	19.2747	24.425	0	0	20.1707	26.9708	37.3076	31.6757	25.3043	25.9413	24.2038	22.9241	26.5748	25.7972	25.7511	28.1107	24.6146	27.4027	22.5601	27.7343	27.1114	26.4059	25.499	0	0	24.3294	28.4168	25.6544	24.3537	25.1837	20.9447	27.1335	23.5829	0	23.7881	19.6277	25.4577	0	24.5286	23.4526	0	20.8127	19.0437	22.4753	33.4088	21.874	0
22.2394	23.1927	0	21.4866	24.3048	20.3188	22.0161	20.4915	24.6273	32.3777	29.4334	22.3443	23.6669	22.672	20.357	23.8282	23.4066	22.9806	26.1375	21.8607	29.8943	20.3052	24.1162	23.8854	24.8847	25.537	21.5253	0	21.7727	24.3282	19.2414	22.8998	25.6094	21.1993	25.3998	19.8271	0	26.328	24.2977	24.2763	18.4332	23.3067	20.5178	22.1899	21.8038	24.7318	23.3745	30.4831	22.9937	19.2022
25.196	24.7284	18.8685	0	25.6445	0	0	23.5864	24.8705	37.9129	29.6832	25.0489	26.4801	23.8612	24.1174	27.1945	23.5914	27.8867	26.7862	26.4883	27.5901	23.68	28.1056	26.8313	26.7569	25.7489	0	0	23.8586	27.4999	25.0887	22.9533	23.8707	21.8966	28.7501	22.0397	0	23.7521	23.4952	25.9324	0	23.6209	23.5513	21.1953	19.2284	0	21.4048	31.4518	22.0283	0
25.0939	25.3186	20.5957	0	26.0662	0	0	20.9563	28.963	37.2638	33.052	25.3684	25.6356	26.1985	22.5251	27.2284	27.8305	25.3507	27.871	24.37	27.6276	23.3535	28.6356	27.3087	26.8029	27.2905	20.6235	20.3491	26.2191	28.9146	24.0652	25.8302	24.8931	23.8686	27.3839	24.174	0	22.8809	0	25.9644	0	24.9981	23.9569	20.8608	19.9581	0	22.3668	34.5349	25.1652	24.0783
25.6146	24.1823	20.4559	20.1463	25.554	0	19.5876	20.4116	27.4588	36.3884	31.9054	25.1724	28.2168	24.3998	21.5983	26.8076	25.7366	24.3755	27.3899	23.1557	27.056	22.5345	28.1074	26.0799	26.0722	25.0428	0	0	24.1169	25.8379	25.2629	23.9454	23.7754	24.3789	29.5076	22.7926	0	23.8587	20.5505	26.5136	17.7373	24.2603	24.8082	20.821	20.9307	0	22.5823	33.3907	24.4972	19.7101
22.7248	24.5373	17.8011	21.1999	22.439	21.0576	20.3803	21.5462	27.1441	30.78	31.0761	22.8433	24.8324	23.9463	22.6503	25.3181	24.9737	26.9903	30.3872	23.7349	29.6175	20.7148	25.7393	23.8286	25.1455	29.0237	23.4167	22.8373	23.2504	25.6339	21.1791	23.7537	26.4032	20.2146	26.4138	25.2436	0	28.063	22.7187	24.5003	0	21.8187	21.9002	23.6803	21.8484	24.1244	25.3652	32.661	23.868	21.551
24.4096	24.603	22.049	0	23.9456	0	17.972	21.9431	30.4994	37.0541	35.1102	25.8425	24.0157	28.0129	25.5278	28.9194	28.933	26.7746	28.4768	26.3908	26.5071	24.962	26.8066	26.9234	25.9678	24.4585	20.3037	0	27.6773	26.5802	22.2628	27.3709	25.518	22.2104	28.0058	0	25.7849	23.8409	22.0506	23.4709	0	23.5691	24.0914	21.3165	20.4397	19.7845	22.7381	35.8605	27.9176	23.7397
25.2519	26.561	20.0831	0	26.2144	19.1356	0	24.3748	26.5529	37.6341	30.9194	26.0824	26.1033	23.5087	22.2922	26.6864	24.7556	26.6727	27.0045	24.5261	27.1839	22.6366	27.3718	27.9536	27.0149	26.9494	20.6066	0	23.7582	27.7245	25.4334	23.0503	24.6712	23.8451	29.015	23.2965	0	24.4449	21.7381	24.8815	20.4735	25.1377	24.8363	21.6173	19.7031	24.6281	21.888	32.6137	21.8194	0
25.33	23.5879	17.8213	0	25.6131	0	22.4365	22.144	25.8955	34.9453	30.5959	25.764	25.3821	23.3485	21.8489	26.4396	24.8823	25.3205	26.6412	24.3318	27.1766	22.188	25.5521	26.3698	26.7663	24.3957	21.3366	22.2549	23.2408	27.4663	25.5504	23.1314	24.5435	23.2062	26.0614	22.7768	0	25.9998	21.0292	25.3466	18.6305	24.5592	22.057	22.4516	20.654	0	22.2595	32.3082	22.9318	20.7637
22.3997	22.1475	19.6328	22.6413	22.7716	22.6675	21.7986	20.3607	26.0306	31.1627	30.3794	22.7832	25.7235	24.6502	20.3261	25.391	23.3082	23.3573	30.5961	22.7064	29.8733	19.9845	25.5973	23.2712	24.26	29.3177	22.0194	23.7078	24.1188	26.2819	23.5944	23.7998	27.0746	22.0746	25.5519	23.1114	0	26.2557	24.2749	24.9759	0	22.274	22.7835	24.2105	21.8938	22.955	24.3835	31.5398	24.2378	20.7197
24.2329	24.6016	20.4631	0	25.1566	21.2058	17.7971	21.0083	21.891	34.0726	26.7957	23.6913	23.9094	22.7912	21.0658	24.7268	23.4193	24.4209	27.7609	22.5428	28.1447	21.3003	28.5201	24.319	23.9501	25.348	19.4756	0	0	24.1624	0	23.3584	24.6678	21.3233	27.1323	0	19.2578	25.6558	22.3133	20.7809	0	21.1171	22.1965	21.4685	21.1373	23.2932	23.7678	28.6842	0	0
24.8903	0	16.3116	0	23.8794	0	0	21.7565	24.3453	28.7377	29.0949	22.4044	23.9496	22.294	18.8663	23.4563	23.1765	19.9677	24.9133	21.1537	26.4481	20.8977	22.9121	24.7571	24.3206	24.7619	20.8328	20.43	22.1112	28.428	23.7739	22.6135	22.3978	21.0324	21.6584	21.0407	0	23.6018	0	22.8762	0	22.9124	20.2466	21.0699	20.0057	0	21.661	30.3911	22.6646	0
25.0618	26.1752	19.5886	17.7223	25.8828	20.0063	0	21.6628	27.4922	37.4254	32.0166	24.4418	26.5432	25.9188	22.8594	26.7878	26.2545	26.5279	27.3751	24.0612	26.6883	22.4724	28.5615	27.6239	25.7543	24.2664	0	0	25.3013	28.5745	25.4549	25.1832	23.3145	24.4981	26.8868	23.3575	0	24.2257	0	26.8496	0	23.4988	24.7496	21.8654	19.7295	0	21.2217	32.9018	26.2578	24.8927
25.7587	24.2708	20.0143	0	25.925	23.1068	0	24.2305	28.3631	36.6332	32.9602	25.5442	26.2956	25.3932	24.0779	28.3177	26.7916	27.0465	27.5669	24.9818	27.3995	23.7099	27.8142	26.7319	26.6794	25.2313	20.1701	0	25.0598	27.3708	25.659	24.8845	24.8567	25.0244	28.7217	22.9835	0	24.452	21.5544	24.9311	16.9131	24.7443	23.4517	22.1867	20.0106	0	21.787	34.3891	22.4115	0
24.886	27.1819	21.4698	0	25.3808	0	0	24.6581	27.9837	36.2921	32.2389	25.0037	25.6477	25.0417	23.4203	27.6248	26.8991	27.0973	28.3305	24.6376	27.7562	23.4557	27.6838	27.1506	26.7989	26.298	20.4407	0	25.251	27.1099	24.8499	25.0375	24.8192	23.5532	28.5869	22.9562	19.7256	26.9388	23.213	24.3165	20.5436	24.872	24.9684	21.2432	20.6784	0	21.5998	33.8366	23.8766	20.5358
21.7597	22.7846	17.7011	22.0843	22.4723	20.6868	21.3889	19.5234	23.5129	31.8413	28.1267	22.4441	24.6766	20.4595	19.9374	24.3446	22.9001	22.2537	30.3116	21.9623	29.7479	21.7522	23.4936	22.438	23.9563	28.5504	24.4239	22.7541	21.1656	24.8529	0	20.8998	27.4795	22.5765	25.5047	0	19.5235	27.0777	24.8294	20.4971	18.7133	21.3694	21.2533	23.8065	22.3529	22.8985	24.9407	30.0166	20.7125	0
23.834	24.6654	19.7112	0	25.8862	21.3844	0	0	22.7336	34.8438	27.8327	23.36	24.4889	0	20.5453	24.4117	21.3922	23.7457	25.1345	23.5346	28.7886	22.5316	27.5205	24.8122	25.1818	24.3701	21.8493	0	22.5447	27.6289	0	23.9817	22.8796	22.7008	29.4786	0	0	24.07	22.5017	23.7167	0	23.5885	22.9424	0	21.2402	25.5496	25.8034	29.4285	23.5871	0
24.7126	19.22	20.7353	0	25.5016	23.9111	0	0	25.9742	35.4058	31.9618	24.9395	24.6229	25.2016	22.9099	26.5371	26.3329	23.6765	26.2533	23.4227	26.8939	23.3168	27.0922	26.5463	26.6922	27.4455	0	0	24.7224	28.5407	25.1662	24.8011	22.6508	23.4796	25.8104	23.2307	0	25.2607	0	25.4616	0	24.0912	22.2951	0	20.3894	24.5632	21.4602	33.1762	26.8255	24.7097
22.0562	24.0909	18.9564	22.3638	23.2344	22.6528	21.8974	20.5032	26.521	33.9948	30.6052	23.6685	24.6873	23.357	22.045	26.3788	24.7588	25.4923	30.7636	23.3589	29.7353	22.1833	24.3534	23.7758	24.9622	29.1625	23.8819	23.3977	23.2078	24.8696	21.1722	23.0538	27.1606	21.9325	26.5401	18.7115	19.0791	26.8329	24.0265	21.1108	17.8784	22.6962	21.7077	24.1602	21.7883	24.649	24.2441	32.1299	24.1206	21.3334
24.3826	24.4619	21.7154	0	24.376	0	0	19.8838	25.8194	35.7711	30.0576	25.0806	25.2988	22.6221	23.7081	28.2295	23.8899	26.3915	29.2217	25.3151	27.8102	24.1658	27.7657	25.1423	25.327	25.3377	22.5164	0	22.4555	25.5937	21.6333	22.4593	24.3831	22.4273	27.5122	0	22.0066	26.9345	22.0255	21.4583	0	24.2007	23.4321	22.6724	20.9295	0	22.8308	31.7634	22.5824	18.7717
20.3395	22.3705	0	21.8001	21.8939	22.4473	22.5286	0	22.35	30.2709	27.2793	22.8262	24.7275	22.7796	17.9436	24.0558	23.4995	23.1061	31.7374	21.2772	30.094	19.8714	22.5856	21.3613	24.0534	30.2739	24.2384	23.1982	0	25.3877	0	0	27.3077	21.3072	25.8088	0	18.4529	26.8822	24.6977	0	0	22.622	20.8466	24.3153	22.9755	24.1253	23.8736	28.7072	27.5139	0
25.8772	23.5756	21.1912	0	24.8796	0	0	0	29.0706	34.2192	33.4174	23.6666	21.7603	26.4875	25.096	28.6841	27.3356	24.9271	27.5903	23.5955	27.235	23.7559	28.7664	23.8902	24.6763	25.8161	0	0	25.9544	27.9423	25.3785	25.8991	23.6545	22.7691	28.0024	22.6144	18.6089	23.0612	0	23.4501	0	23.4761	24.0173	0	19.7288	22.7936	22.8838	33.6058	27.2301	24.4312
23.0662	23.3227	20.8424	20.5429	24.9119	21.2041	0	21.0922	23.8854	35.1427	28.8552	24.1443	25.2766	22.419	20.2561	25.4151	22.8612	25.1509	26.5423	22.9901	28.9318	22.2984	23.007	25.3821	25.308	25.8574	23.0602	0	21.7008	26.6028	22.7261	20.9345	26.5101	23.9209	29.2204	21.6857	20.2185	25.1448	26.7681	22.9252	16.969	24.849	22.7331	21.9424	21.7009	26.2897	23.7066	30.4589	21.4771	0
24.9555	26.166	21.0892	0	25.6353	0	0	24.4516	27.2848	38.394	32.0546	24.8307	25.7647	25.9166	22.1748	27.1921	26.7135	27.6524	26.5559	24.7671	27.4994	21.6256	27.6625	28.5608	26.2531	26.1353	0	21.7487	25.2965	26.6692	25.0872	25.1744	24.8983	23.06	29.6429	23.4921	0	24.1594	0	24.8056	19.7198	23.7618	25.1775	21.8702	20.3385	20.4094	21.039	33.4482	22.9702	0
22.1871	21.8601	18.9121	22.0703	23.1515	0	14.3602	0	26.3566	31.3122	30.5278	22.9587	24.172	23.6209	21.3001	25.5172	24.7186	21.8331	28.3497	22.0606	30.6152	21.9439	23.0391	23.1546	25.4586	26.5332	22.2424	20.8072	23.6616	23.6637	20.8907	23.1454	26.5329	23.1191	25.1112	21.6572	0	25.2637	24.0201	24.7605	16.8541	23.4341	20.9334	22.8484	22.443	24.6862	23.3399	31.2228	23.9159	20.8156
23.9777	20.4253	19.6222	0	25.0067	0	0	0	25.5977	33.6539	30.0545	24.7669	25.0405	23.0788	21.0327	25.0169	24.2413	24.1579	26.0812	23.6617	27.4645	22.3889	27.2844	25.4702	26.3825	25.8457	19.6998	0	23.4115	28.9042	20.5919	23.2376	23.8607	22.5283	27.743	21.0524	0	26.5617	0	23.0563	0	24.2364	22.9728	0	19.5187	23.1023	21.2391	32.1378	20.8155	0
24.0665	24.5656	19.5012	20.3701	24.3998	21.6397	18.2495	22.8803	25.2506	35.9497	29.8762	24.5203	26.0747	23.0528	21.3447	26.6227	23.611	25.8215	26.6693	24.166	27.396	22.1605	26.6261	26.8822	26.0122	25.4206	21.355	20.0624	22.2461	26.7374	23.8786	22.6948	25.1702	23.6986	27.5854	22.0152	0	25.6294	21.9735	23.0563	18.4786	24.4689	22.3334	21.8283	21.0409	22.9359	23.0487	31.4183	22.8891	0
23.952	19.1341	21.5888	20.1352	26.0302	18.4285	0	20.7982	25.9414	36.1534	30.4538	25.1802	24.8316	23.3466	21.6751	26.161	24.3884	23.3099	26.9093	22.7848	26.1709	22.971	27.5574	25.7032	26.3033	24.6479	20.5304	0	23.1264	29.6446	24.9097	23.1618	23.7289	23.5405	28.7545	23.216	0	24.3176	19.3337	20.7208	20.2741	25.0801	23.7172	0	19.9167	24.3777	22.5486	31.804	24.6051	20.4835
23.4037	23.4324	0	21.9463	23.1066	23.9398	22.0486	20.3796	22.2586	32.0503	27.8322	22.1793	24.7511	23.7838	20.5323	24.3274	22.8482	24.7728	31.1077	23.5422	30.3424	20.49	0	21.1367	24.6954	29.0324	24.8398	22.5177	22.1064	24.0984	19.2882	23.6209	26.9462	21.4793	27.4447	0	0	27.486	24.2413	20.9771	0	20.9913	21.3465	23.8343	22.45	22.8715	26.422	29.5472	21.9449	0
25.3181	25.2749	19.8056	0	25.0799	0	0	20.6856	27.2441	37.2787	31.0496	25.1607	25.5246	23.8553	23.2948	27.705	25.326	26.855	27.2231	24.9983	26.2905	23.9134	28.6271	25.2767	25.855	23.5493	20.4	0	24.3003	29.038	25.0715	24.0329	22.5918	22.9931	27.8309	22.1421	24.727	23.3902	21.8631	24.7776	0	22.7644	24.5024	20.1992	20.5255	19.158	21.852	32.5208	22.3087	0
24.341	26.2885	21.438	19.9249	25.7214	22.1843	18.679	0	25.5544	36.0506	29.8915	25.2037	25.6995	23.3643	22.7515	26.914	24.5636	25.4717	26.6164	24.0373	26.6225	24.0641	26.9033	27.9532	25.6241	24.9195	21.2328	0	22.9881	26.6957	24.3247	23.5058	23.7944	23.7631	32.1873	22.1207	0	22.7018	21.6807	22.2492	0	24.0108	23.5728	0	21.8606	18.5494	24.6728	31.9407	24.6925	22.6836
25.0169	27.0859	21.5459	17.8876	25.9226	20.9749	0	23.6747	28.8321	36.1145	32.7183	26.2629	25.4704	25.5283	23.919	27.3108	27.0086	26.4772	27.1157	25.1179	27.4238	24.0155	27.398	26.9795	26.7608	25.4349	20.3214	0	25.2945	27.4372	24.8382	25.1909	25.2177	23.4288	29.4361	23.2916	19.0312	24.7356	21.5547	24.7305	21.0385	25.6415	25.5661	21.7094	20.0157	0	22.0915	34.4899	25.663	22.4308
24.8336	26.332	20.1669	19.4147	26.6187	18.8182	0	22.4584	26.6098	37.0106	32.0621	25.6038	25.959	24.8516	23.561	26.9516	26.3469	26.571	28.0777	24.2444	27.5127	23.4823	28.903	27.2811	26.7384	25.5764	20.6233	0	24.5608	28.7285	25.8377	24.4422	25.1332	23.7866	27.3245	23.6659	18.0724	22.8056	20.7268	25.2423	19.0271	25.5413	24.0876	21.3626	20.1731	0	22.7819	33.4351	25.4865	21.5278
25.1992	24.4625	21.0668	0	25.1489	0	20.0453	21.928	26.4106	36.055	31.055	25.1792	26.6509	23.6362	21.4495	25.3299	24.3032	24.4763	26.3243	23.5236	27.5861	22.3233	28.1908	26.1334	26.9464	24.1702	20.0586	21.5648	23.5055	27.3235	24.3039	23.1455	24.2308	26.0309	29.4983	21.0572	0	25.4505	23.9813	26.6884	0	23.3769	24.8576	21.8894	19.2881	0	23.8556	32.547	22.145	0
25.1162	26.5291	19.3435	0	25.3064	0	0	0	28.6206	38.4117	33.0247	25.2246	25.9434	26.3748	24.5133	28.1304	27.2603	26.5101	27.1275	25.1555	26.5862	22.6771	26.9486	28.3172	26.0406	25.9902	0	0	25.9435	27.3247	26.1612	25.5881	23.9869	23.6259	28.7098	0	0	0	0	25.6213	0	23.9501	24.9979	0	0	0	22.4242	34.3229	25.9244	22.7825
24.3321	24.7795	20.6248	22.8223	23.1074	21.4365	20.2601	21.9206	26.0821	35.5077	29.938	22.7103	23.1629	24.4017	24.5773	27.4397	24.8564	25.5166	29.0567	23.7946	28.992	23.6638	25.4013	23.9339	24.4203	26.4066	22.9714	23.1106	24.3008	26.2856	23.4347	26.0793	25.6897	19.7245	26.6338	21.6279	0	24.9336	22.6406	22.727	0	22.0642	23.6064	23.0133	22.0668	25.2248	25.7026	31.3642	22.4601	0
25.5688	21.9099	22.5314	0	24.496	0	22.8848	0	24.8025	35.6972	28.5108	23.8998	27.3588	21.9938	20.0871	24.0264	23.4008	23.2592	25.2447	22.4647	28.1343	21.6517	25.6869	24.56	25.4537	26.6421	0	22.4891	22.5454	26.7629	22.2327	21.6047	24.212	21.8477	28.5341	20.1689	0	22.3431	22.5996	26.1872	0	23.4029	23.9689	20.6048	21.1299	0	22.4308	30.4637	20.4337	0
24.9327	24.0442	20.657	0	25.052	0	0	24.5116	28.1205	36.1576	32.0918	23.4197	24.8755	25.4202	23.246	27.7469	26.2776	25.2745	27.1287	24.2478	26.9872	22.9472	27.7469	25.8032	25.9304	24.3896	20.7292	0	24.5294	27.6407	25.306	25.0132	24.9221	24.2844	26.7344	23.1375	0	22.3819	0	24.545	0	24.0303	24.1633	20.6636	18.9383	0	22.5997	33.7613	26.6289	23.6642
24.3779	22.4146	19.2542	19.3462	24.8214	0	0	0	23.281	36.5248	28.0473	23.6806	23.4896	22.0312	19.2128	23.1352	22.8215	21.1782	25.3476	21.7887	27.4314	19.8716	26.485	21.6544	25.2777	24.4434	19.7599	0	21.5938	26.8967	0	19.3919	23.7082	21.4574	26.5166	18.8712	0	24.7801	23.0253	23.9778	0	21.8533	22.0301	0	21.3185	24.5345	24.2695	30.0409	20.6398	0
24.4797	20.374	18.6399	0	24.7976	0	20.3635	0	28.5518	34.1743	33.162	24.9091	25.0185	25.4571	22.054	25.3856	26.62	25.5473	26.4764	24.385	27.0995	23.28	27.6687	25.874	26.2213	25.112	18.3087	0	25.0613	28.7036	22.9298	25.1777	23.7069	22.5098	27.8108	21.6767	20.5945	26.1813	0	24.6748	0	24.2377	23.7281	0	20.4197	22.3321	22.341	33.9698	27.7974	23.1768
24.6445	23.2817	18.2767	0	25.0976	0	0	22.3485	27.0328	34.8739	31.398	23.5859	24.9479	24.4132	23.0877	25.9679	25.5835	24.4325	27.0154	23.2605	27.6271	22.6079	26.6004	25.7951	26.2895	24.6398	20.5087	0	24.1515	26.7833	23.9014	24.0906	24.39	22.7628	26.2791	21.6982	18.6892	26.8815	21.7326	22.7238	18.4971	24.0398	22.2544	21.9706	20.7178	0	22.103	32.6716	22.8728	0
25.5308	21.0143	18.687	17.5904	27.0703	0	0	18.6191	26.644	33.3914	30.9345	24.7017	25.2808	24.5993	22.7456	26.0829	25.637	24.0274	27.152	23.0171	26.3074	22.36	28.9353	24.7671	25.8023	23.6784	19.649	0	24.4596	28.3141	25.8674	24.0847	23.8347	23.6842	24.8148	22.8061	0	24.9518	0	27.1453	0	24.7651	22.404	21.485	19.6279	0	20.69	32.2992	24.8029	21.6583
25.9005	23.9067	21.0847	0	24.941	0	0	20.681	25.8375	32.5165	31.3938	26.1221	25.9615	24.8474	25.4975	28.6257	25.009	27.8769	29.784	26.5959	26.6499	24.3209	27.6469	23.5099	28.0483	24.1842	19.5191	0	24.5882	27.1288	22.9442	24.6604	23.3723	23.301	26.5959	0	21.4848	27.1319	20.1817	22.6075	0	24.5857	23.13	19.7281	18.8063	21.0321	24.0002	32.169	24.3069	21.8389
21.3349	21.72	0	22.1261	22.1078	22.3034	22.294	21.3859	24.395	29.1447	29.5021	22.3226	23.6612	22.5227	20.7103	24.7923	24.7403	25.7454	30.9335	23.7327	29.869	20.9309	0	23.0997	24.0421	29.1254	24.4385	23.3748	23.329	24.5092	0	23.556	26.818	20.4243	25.1669	0	17.8653	27.3973	24.2121	22.3664	0	23.2826	20.4211	24.2587	21.9477	24.8855	24.4673	30.5522	22.8737	21.3502
23.7213	23.5316	20.0468	0	25.302	0	0	0	24.3761	35.3829	28.7942	23.6329	24.5013	24.7081	21.8716	26.4938	23.7037	25.7679	28.3887	24.6298	28.0242	23.7568	27.2362	24.2949	25.2205	26.5845	21.6396	22.0367	23.0045	27.4552	22.0519	23.7668	24.893	22.6292	27.1918	0	21.4709	26.3275	0	23.1833	0	24.8885	22.9829	23.6284	20.8358	24.0313	22.9894	30.3625	22.9088	20.9242
24.9825	25.5371	21.2058	23.1816	23.8384	20.109	21.6038	24.6086	27.7308	36.8084	31.7627	23.5621	24.7186	25.567	24.8343	28.3346	25.8591	29.2169	28.4049	25.3741	27.1424	24.5433	26.3903	26.8138	24.8303	24.9786	21.6362	0	25.2692	25.6095	24.8556	26.0023	24.3068	23.2927	28.3309	22.131	0	25.0129	20.0863	24.1944	0	23.3233	24.4723	21.9598	19.8109	23.1129	24.1879	33.3842	25.9238	21.7155
25.4509	22.0717	20.7877	19.2299	24.9047	0	19.7868	20.6114	27.5989	35.5272	32.0582	25.9326	26.833	24.6473	23.04	27.8	25.7481	27.01	27.3862	25.1049	26.7566	22.7895	27.6041	27.2377	27.0876	27.9636	0	20.7788	24.2336	28.4376	25.4791	24.2364	24.6158	24.0278	30.6031	23.0145	0	23.6776	23.3047	25.7998	19.2082	23.9737	25.2581	0	20.1662	21.6954	22.5756	33.4532	25.0517	21.2239
24.4642	22.4714	19.2944	0	25.0509	0	0	24.4938	25.4762	36.2034	29.9369	24.4531	24.5938	23.0365	19.7284	25.1195	24.6009	24.1787	26.5486	23.1352	27.5601	22.2016	27.7884	24.4659	24.6573	24.611	20.5797	0	23.9567	26.4199	24.906	21.4612	23.9017	23.0106	26.1554	22.4236	0	23.5972	22.7582	23.1638	0	23.5771	22.5768	21.6672	22.1599	21.7813	23.2377	31.3272	23.0204	0
25.3596	24.9752	20.0571	0	26.0079	0	0	24.2339	26.5727	37.5569	30.8504	25.6026	26.0956	24.7936	23.5363	26.4419	25.9606	26.6077	27.0137	25.2647	27.0331	22.385	27.635	26.8448	26.6117	25.5499	24.7935	0	24.6712	27.219	25.6828	24.5282	24.3037	24.0119	27.5721	23.8873	0	21.122	22.1107	25.669	0	24.1789	22.8566	22.0253	19.5424	0	20.9508	32.9047	22.0409	0
24.0137	24.1132	19.4024	22.227	24.0092	23.5891	22.0866	0	27.199	33.2902	31.6926	24.9318	26.0445	24.4154	22.2962	27.2716	25.4732	27.0713	30.4471	24.2479	29.0153	23.6673	26.3267	21.4773	25.7693	28.2522	23.575	24.0213	23.8351	25.3023	20.4875	23.9225	26.4049	22.0697	27.3014	20.1531	0	26.8673	23.6569	22.7044	0	23.9101	22.1603	24.0168	23.2657	24.6704	24.5061	32.7634	23.7584	19.5956
24.5773	20.7887	22.1731	0	26.635	19.0772	0	20.9516	23.7698	36.9142	29.006	25.5368	25.1008	22.5768	21.2692	25.2846	23.4735	22.9033	26.4038	22.7632	26.1658	22.1955	27.215	27.6862	26.562	28.7109	20.9266	0	21.5893	27.2007	25.6678	28.2991	23.0463	24.5847	29.1648	23.4324	0	24.0192	0	22.357	19.5011	24.9406	24.162	0	19.9085	25.6645	22.4037	30.3334	22.9275	19.3993
24.0947	24.4181	21.8594	23.3242	25.7717	0	0	25.0588	27.2468	37.1233	31.2447	25.321	24.8626	24.3255	22.8788	28.1656	25.3023	26.0363	27.9342	25.8449	27.4031	26.0084	27.2246	25.669	25.9254	25.7609	20.0028	0	24.2048	27.7841	25.7582	24.5688	24.1747	23.229	27.6568	23.9725	0	25.8557	23.0699	25.4323	0	24.6618	24.0157	22.1324	0	24.1928	23.2564	32.4525	24.5975	22.8448
25.5009	24.8052	20.5554	0	25.3465	0	0	23.5605	25.347	37.3213	30.1797	25.0246	26.3995	24.0448	23.4044	27.4835	24.8857	27.1487	27.6055	25.6118	27.0648	24.0209	28.1009	26.7284	26.5736	23.3807	0	0	23.6369	27.9491	23.8013	24.4056	24.1554	23.326	27.9377	22.4192	24.602	25.9163	22.8498	25.0004	19.8637	24.7112	23.5644	23.1319	20.2163	0	22.1193	31.5411	22.2139	19.2712
25.2086	23.8303	18.7736	0	26.4351	0	0	0	25.4845	34.1052	30.301	24.7882	24.4723	23.4299	21.9954	25.4248	24.9387	22.3775	26.4076	23.0101	26.5192	22.7917	28.7439	25.0491	25.54	23.1981	21.1199	0	23.159	29.0079	25.3178	22.6885	24.0541	25.1953	26.0443	23.3837	20.3213	23.7598	0	26.2634	0	24.9263	23.0004	21.1295	20.0056	0	22.6625	32.0855	22.2265	0
25.4124	27.6856	20.6005	0	25.8928	0	0	24.7591	28.8921	38.4306	33.3511	25.5292	26.0098	25.831	24.3237	28.0138	26.8845	26.7611	26.8597	25.3776	27.193	23.4191	27.4964	28.966	27.3513	25.6782	21.7472	0	25.5544	26.4959	25.7642	25.4597	25.0117	24.2698	29.0863	23.5321	0	21.8573	0	26.0685	20.6715	24.7517	25.4412	23.3059	19.7974	0	22.1406	34.8718	26.1187	22.2713
24.7806	21.157	22.9455	20.4771	25.287	0	0	21.1248	26.0026	33.486	30.3692	25.3756	23.382	23.5836	22.8357	26.7763	24.753	25.8396	27.3118	24.224	25.0538	23.2213	26.4065	26.154	26.0519	29.3916	20.9615	0	23.3787	28.5042	22.7996	23.9679	23.6425	25.4716	27.8651	21.1668	0	26.1705	0	22.3122	20.7698	24.6891	24.1129	0	19.7931	25.6895	20.3803	31.5316	23.5766	21.6261
26.0631	26.9433	20.2362	0	25.7528	0	0	23.582	25.4532	38.6776	30.4952	25.2563	25.9786	23.2481	20.6537	25.6069	25.3271	27.1273	25.9729	24.2692	26.3223	19.7198	27.6965	27.6144	26.8372	26.3497	0	0	23.3657	27.5795	25.543	22.3311	23.9643	23.8349	28.9357	23.1198	0	23.6649	0	25.8725	19.5322	23.6443	25.0831	22.3418	0	0	20.9401	31.5446	25.0517	22.634
24.9085	27.9443	22.2798	0	25.6835	0	0	22.8086	27.5938	36.9974	31.805	23.4305	25.7384	25.0459	22.986	26.6071	26.2222	26.8888	26.5765	25.2955	28.0732	21.1635	27.5892	27.3749	25.1981	26.2505	19.5006	0	25.2064	27.0262	24.9229	24.9971	24.9274	22.7812	28.2589	22.5319	0	23.5738	21.5571	24.1431	19.4678	24.3402	25.3882	20.3757	19.8727	0	21.9858	33.2066	24.4194	21.9283
23.382	18.4801	21.9743	19.147	24.7134	19.0473	0	21.0018	24.411	34.8976	28.5028	24.8278	23.2773	22.1983	20.2046	25.1416	22.7842	23.6482	27.0911	22.6504	25.2392	21.9876	27.36	27.6872	25.7157	24.2076	19.8798	0	21.307	29.777	0	23.0198	23.5892	22.2615	27.7339	20.8571	0	26.5108	0	22.7117	18.3983	23.3804	23.3782	21.6498	19.937	26.4618	21.5484	30.2242	21.0617	0
25.1652	22.8828	20.5358	0	26.5315	0	22.7354	22.0309	25.1633	36.805	29.6177	24.8942	26.1276	22.1027	21.7152	25.9276	23.5242	24.2799	25.9806	23.3962	27.4544	20.9077	29.0668	27.2411	25.8923	24.9191	19.246	0	22.74	28.8797	25.2996	21.9618	24.17	23.6238	26.2776	22.9902	0	23.3258	0	26.2855	0	24.618	23.0124	21.1698	20.0995	0	22.9518	31.3734	22.42	0
25.2173	27.5965	21.347	20.3265	25.7661	0	0	23.9241	27.5182	38.2287	31.9094	25.1424	26.5859	25.0759	23.3333	26.7601	25.8919	27.7535	27.0393	25.1202	27.4337	23.088	27.9535	28.0816	26.6719	26.0164	19.8678	0	24.5072	26.9939	24.6764	24.4394	24.9626	23.0144	31.4035	23.4402	20.7107	23.2607	20.8947	24.7669	18.1565	24.3394	24.7072	21.9741	20.0782	19.6435	22.4903	33.402	25.9637	21.8189
24.636	22.7524	22.8571	21.7226	24.0034	24.2291	22.3969	0	25.9953	33.2953	30.4355	23.6669	26.7754	24.4175	21.1911	26.2669	25.2307	24.3467	28.3147	22.3514	28.1296	21.4139	23.5799	28.4992	25.708	25.59	23.1488	22.6282	23.4179	25.4336	24.9031	23.3618	25.5973	22.1943	27.9974	21.1271	0	25.5126	24.4176	22.9402	0	23.7293	24.0098	22.5165	21.2763	19.5217	24.2928	31.7302	22.2379	19.3328
24.128	25.2047	0	19.934	25.691	19.6414	20.8298	19.7705	28.7815	34.7839	32.7311	24.2325	25.8392	25.8534	21.5716	27.2333	26.9459	24.1735	26.9665	22.785	27.2004	21.9102	28.4173	25.319	25.6692	25.824	22.1806	22.1833	25.5111	26.2233	25.116	25.3483	23.1601	23.6824	30.3133	22.293	0	23.3911	18.9134	24.7438	0	23.4237	21.8008	20.67	21.731	19.5786	25.2279	34.2106	25.0189	22.4344
22.2539	22.7486	16.3699	22.7326	23.1138	22.5887	22.9118	20.8331	26.3	32.5714	30.9843	21.8931	25.8048	24.1951	22.145	25.6327	24.7483	23.4177	30.3839	20.9762	29.9264	22.156	23.8697	22.0648	23.6636	28.7495	24.7792	24.0383	23.2657	24.451	21.4085	24.522	26.9864	21.8667	25.8175	21.4357	0	25.8772	24.4103	22.7277	0	22.1605	22.3734	23.6442	23.197	23.5089	25.428	32.2237	24.4839	23.4551
25.5499	24.5855	19.5844	0	25.2658	0	0	21.1989	25.7001	38.2889	29.6897	26.2728	26.9553	22.1703	22.635	26.6936	23.954	28.0388	26.7615	25.1314	26.7025	22.9397	28.7808	26.5362	26.1333	25.2565	20.8332	0	22.4143	27.8042	24.5473	0	24.8539	23.8579	27.4748	22.9852	20.5797	24.4017	22.8056	25.8458	0	23.8839	23.496	22.0169	20.178	0	22.4819	31.4219	23.4956	22.569
24.8127	25.4592	20.3197	20.2079	25.8522	0	16.2835	24.7352	27.763	37.7899	32.8192	25.4476	26.4342	25.2022	23.3841	27.5165	26.2682	26.9274	27.1236	25.6093	27.0257	22.9364	27.9192	27.8673	26.7494	26.4871	21.0736	0	24.9724	26.6899	25.4473	24.7332	24.8607	24.6794	27.6495	23.6717	0	22.7803	21.2448	25.6771	0	24.4599	23.7336	21.4343	20.0675	0	21.8462	34.2854	26.1628	23.5197
25.5467	27.4714	20.3508	0	25.9735	18.0695	0	24.6508	28.477	38.2581	32.9259	25.9369	26.4938	25.2164	22.9161	27.211	26.6558	27.6857	26.8853	25.0716	27.1271	23.12	28.4312	28.9736	27.7247	25.2304	0	0	24.9611	27.8393	25.5643	24.8658	24.7251	25.1627	28.1771	23.4323	0	21.9817	0	26.2544	0	24.0672	24.9608	21.4003	20.4715	0	22.4896	34.4811	26.6203	21.9838
22.7632	23.5684	19.5775	22.0463	23.4648	22.5962	21.8542	22.8551	25.6197	34.6119	29.8864	23.1574	26.254	22.8465	21.1495	25.1306	24.1216	23.3865	30.0486	22.026	30.2863	20.6412	23.8516	23.8763	25.0992	28.4628	24.1871	22.1344	22.7177	25.3069	22.8323	22.7382	27.1856	22.3642	27.486	21.0922	0	25.8501	24.8632	24.8139	0	22.5208	22.5501	23.4407	23.1388	21.6407	24.636	31.6701	22.196	0
25.8701	23.4416	0	0	24.8154	0	0	0	27.1774	38.5973	31.0198	25.533	26.5439	23.9324	21.6292	26.4733	25.327	25.8834	26.0915	24.7899	26.2568	23.682	29.1831	27.1609	26.5235	24.673	0	0	23.6574	27.5442	25.6637	23.1766	23.4421	23.8391	27.9374	18.9438	0	26.1573	0	26.4301	0	22.8905	23.9469	0	19.5585	0	22.3915	32.8438	23.1607	0
25.2233	24.7875	21.277	0	25.7195	0	0	23.9012	27.2736	37.528	31.9394	23.8634	27.186	24.7138	23.4136	28.4	25.2112	27.3787	26.8678	25.1211	27.0307	22.9117	27.14	26.7596	25.3278	25.7373	0	0	24.2153	27.2176	25.3745	24.3191	23.324	24.0142	27.4712	23.5451	0	25.9009	22.1816	25.6784	0	22.9499	23.5959	21.5427	20.614	0	21.9452	33.1287	23.4172	20.0551
25.0479	27.3829	21.1632	0	25.2271	0	0	23.7625	27.812	38.7219	32.046	25.0129	26.0997	26.1767	22.6403	28.6912	25.8906	28.278	26.0927	24.082	26.0142	20.5056	27.4302	28.1433	25.9204	26.1464	20.9634	0	25.3758	27.2066	26.0018	25.5882	23.5415	23.1281	29.9599	24.3244	0	22.9016	0	25.9762	0	23.4271	25.2432	22.3075	20.5472	0	20.1889	33.6061	22.883	0
25.4202	21.4606	19.2606	0	25.7643	21.0626	0	19.8723	25.8568	34.3074	30.9174	26.537	24.9583	23.293	23.0911	27.2639	24.4929	27.5922	27.6407	24.6478	26.1549	23.6792	28.0267	26.7445	27.36	26.3748	20.2453	0	23.1366	29.0579	22.3078	22.485	23.1643	24.2141	27.76	22.0109	21.6857	24.9102	20.9135	24.9823	18.6946	24.7719	23.1109	0	19.2083	23.6272	22.6493	32.2965	23.3564	21.5928
20.2524	23.609	17.9127	21.6321	22.2415	23.2102	22.8863	24.4673	24.3228	31.9367	28.9294	22.6824	23.7578	23.4273	19.5968	24.2075	22.8311	24.1788	33.674	21.7481	30.2612	20.3491	22.6443	21.6925	24.0419	29.2307	23.7655	23.7275	0	25.2579	19.3358	24.0168	27.5731	21.5619	26.8847	22.5288	19.6417	26.6111	25.9162	22.6489	0	21.7909	21.3366	24.3711	22.8452	24.333	24.7424	30.2437	22.1325	0
24.9123	29.2858	22.346	0	24.1205	0	0	23.372	27.2042	38.1303	30.7154	25.9065	25.9833	23.4284	22.5861	27.4865	24.9663	28.9248	26.4154	25.8113	27.7027	22.4126	26.9642	28.913	26.5753	25.9735	20.5673	0	24.3199	26.7692	25.5712	22.6318	25.467	22.7671	32.984	22.5093	0	24.8932	21.3275	23.6223	21.7694	24.8513	26.2324	22.0867	0	0	23.7238	32.5293	25.2737	0
25.5781	23.3855	22.3048	0	25.9956	0	0	23.793	28.5046	36.3482	32.5547	25.1611	25.5749	25.2828	21.995	29.1757	26.7674	25.4488	26.8467	23.5218	27.1451	22.342	28.6041	25.7321	26.1359	24.1259	0	0	25.3095	27.9402	24.7599	25.1231	23.5014	24.4477	27.0584	23.3411	22.6255	0	23.0419	25.8981	0	24.7877	24.2503	20.3366	20.5576	0	20.7703	34.164	26.3514	25.4622
25.993	22.7369	17.3274	0	25.3588	0	0	0	23.636	32.0562	28.6935	26.0355	29.0095	22.5759	21.2511	24.4924	23.9209	24.4263	27.0167	23.3667	28.0421	21.3515	26.0785	26.4299	28.0808	24.2553	19.7977	0	0	27.1451	24.7894	20.6455	23.1106	26.4392	27.9361	21.4409	0	23.8908	0	25.7811	0	25.0569	23.589	21.3541	19.7649	0	23.4522	30.5545	22.2533	0
25.1715	21.5457	18.5285	20.3754	25.7535	22.1391	0	19.7601	25.4146	34.4368	29.5884	26.5493	24.4397	22.4	21.8867	26.8569	23.6747	25.8783	27.1068	24.5783	26.6604	23.3306	27.335	26.1984	27.3316	26.9066	20.3329	0	22.3648	28.7187	24.9677	22.9871	23.4387	24.287	26.8342	23.3165	22.4881	25.5645	20.4472	24.6984	0	25.9706	22.4519	0	19.9427	24.5146	22.4222	31.3468	25.8799	24.0189
25.1863	22.3561	0	22.8642	24.595	22.4507	21.8337	0	26.7073	33.6401	31.4248	26.7863	24.7575	24.4774	23.5852	26.9425	25.5965	25.6606	28.5328	22.992	27.3475	23.6766	28.1153	26.0155	26.427	26.3986	23.7176	24.579	24.1229	26.8316	25.377	23.73	23.7011	24.1663	26.5651	23.2251	0	25.2372	24.0542	25.8421	0	23.4881	22.0018	24.2147	23.6346	24.2533	23.4183	32.4243	23.4184	21.9464
24.9799	26.0607	21.7424	0	24.9765	0	21.2853	22.9953	28.6051	36.1492	32.7828	25.5466	25.5651	25.7727	23.9808	28.2088	26.8473	27.8697	28.2598	25.3292	27.4304	22.5847	27.4526	26.8852	27.0482	25.2089	20.8329	0	25.8764	26.3084	24.0925	25.6096	24.1963	22.1029	27.8427	23.0725	22.6487	24.3455	22.3621	24.6367	0	24.7685	23.8285	21.2938	19.7387	0	23.1121	33.992	24.9521	23.2056
25.0766	28.1825	21.2008	0	24.95	22.8224	0	23.6925	27.5785	38.1462	31.5956	25.5972	25.8689	24.651	21.9604	26.9707	25.9914	28.1779	26.7635	25.4794	26.4049	22.0145	27.8639	28.5162	27.3112	26.0027	22.2849	0	24.2651	27.2647	25.3965	24.8915	24.5429	23.1979	28.9533	22.6797	0	23.101	0	25.2747	20.8038	24.6138	25.4447	21.3208	21.2941	0	22.3649	33.0085	23.5494	20.7491
25.6237	26.5038	21.7291	0	25.4452	0	17.2361	19.5812	26.3197	35.8641	30.923	24.705	26.6988	24.0604	24.1182	26.815	24.6675	25.9661	26.8136	23.9211	28.1697	23.6829	27.1991	24.979	25.9608	24.7687	19.7693	21.5553	22.7661	25.0883	25.4984	24.0164	24.5901	26.2305	29.627	21.8069	20.3926	24.5102	24.7053	26.2211	0	23.7967	25.6484	21.0969	19.9002	0	24.4707	32.1748	23.7031	0
23.5768	0	18.9655	0	23.3536	0	0	0	29.8447	34.4303	34.321	24.5392	26.1201	27.8475	22.5496	28.4699	29.3717	24.8462	27.8377	23.9463	26.0309	24.0563	25.4757	25.837	25.9958	26.1069	0	0	27.1783	27.5661	23.5896	27.2158	23.615	21.8517	30.7546	21.6803	0	25.0599	24.181	24.6527	18.9987	24.3025	23.3313	0	21.6032	19.8068	22.4238	35.4831	25.9931	23.82
22.7172	24.6969	20.4069	0	24.975	0	22.7302	0	25.0132	36.8252	29.4474	24.2104	22.868	21.9493	20.61	25.4116	23.6183	22.2268	25.9597	22.9003	28.3618	22.293	26.6738	23.9905	25.5297	27.3119	21.4104	21.9134	22.2663	27.7752	23.8219	0	24.4992	22.6204	28.3983	20.6287	18.5426	23.6724	21.9631	21.1702	0	24.5157	22.776	0	22.1513	24.1451	24.6222	30.8184	22.1227	0
25.4815	24.2474	20.2784	19.7696	25.1383	0	0	20.4116	22.6842	34.9632	27.5345	23.8608	23.0946	0	20.349	24.4679	21.7614	22.6569	25.5159	22.9798	25.2555	20.623	27.08	24.4468	25.3669	26.3285	20.9229	0	20.3428	26.2875	21.9983	20.1749	22.534	20.9387	26.3273	18.8231	0	24.3427	20.8219	23.1389	0	22.3105	22.9577	0	20.5026	20.4247	24.984	29.4698	22.432	0
22.0268	22.5523	18.0229	22.7639	22.2323	23.4676	22.6027	20.213	25.4706	29.9372	30.2561	22.773	25.1563	22.6508	21.6209	25.9623	23.8887	24.4024	31.1582	22.1536	29.6435	22.2923	0	21.6315	23.9213	29.9827	24.3006	23.8276	22.5998	23.9042	19.3286	22.3099	27.2074	20.1113	25.3831	0	19.4912	27.4203	25.4279	23.7409	17.2355	22.4124	21.3222	24.5708	22.8152	24.8056	24.6813	31.1554	22.6662	20.27
24.3938	27.2259	21.0192	0	25.3463	0	0	23.4944	27.2916	35.2612	31.6951	23.0849	25.8762	25.1152	21.8554	26.2839	25.9162	26.7889	27.1649	24.475	28.2696	21.7046	27.1974	25.613	26.0939	25.8521	20.8261	0	24.7469	26.4333	25.1818	24.8714	24.3864	22.2266	27.306	21.9859	0	24.6067	22.156	24.0644	19.3848	23.8889	24.6156	22.4667	20.7941	0	21.8374	32.8982	22.0374	0
25.524	26.9234	21.8212	0	25.853	0	0	25.3342	27.8032	37.5751	32.2996	26.3636	26.9647	25.3873	22.572	27.6978	26.7607	27.8354	27.2045	25.33	27.6803	22.7307	28.5937	27.636	27.2076	26.7919	0	0	25.2849	27.1713	24.1581	24.8511	24.7178	24.2519	29.5203	24.115	0	23.0577	22.1784	25.2117	20.3749	24.4871	24.4972	21.0681	20.3595	0	22.4857	33.323	25.1866	23.0367
25.362	25.2624	23.951	21.2742	25.9451	0	0	22.0026	24.2473	37.5633	28.4801	24.2069	26.6019	21.9522	20.5733	24.4455	23.3305	23.6847	26.1734	23.6813	26.5204	23.0398	27.158	26.9898	26.1775	23.2992	0	0	22.4047	25.0111	24.3873	20.405	22.899	21.2724	31.5149	22.3601	0	25.0734	0	24.0346	0	23.8048	25.8052	0	21.5551	0	21.533	30.3955	22.4733	0
24.0342	25.0609	20.0451	19.9678	25.0902	0	0	0	24.3243	35.0509	28.637	22.4668	24.1118	23.0463	18.8858	23.4498	22.9473	21.6837	25.5538	21.2781	28.0386	20.1537	24.0014	24.8805	24.176	27.1435	22.3893	0	21.9357	25.5953	0	21.9066	24.0926	21.6193	26.5202	0	0	22.4166	21.9052	23.1596	0	22.2159	22.5169	0	22.6908	23.4548	24.312	30.1747	24.6692	21.4639
25.2401	27.0247	19.7309	20.4387	25.8275	0	0	23.9149	27.8112	37.1691	32.9458	26.2977	27.2188	25.6293	22.822	26.9336	26.8516	28.1825	26.7883	25.7158	27.5978	22.3165	27.9089	27.6412	27.0598	25.0671	19.8799	19.5773	25.2064	26.8732	25.9541	25.1403	24.8063	24.4278	27.1038	23.7141	0	22.0682	19.9505	25.0895	17.9675	24.4678	24.2876	21.5556	20.3805	0	23.19	34.2925	26.8755	22.6413
22.0323	24.7367	20.071	22.1216	23.291	21.2624	19.0351	20.2292	24.2475	34.9657	28.667	24.3262	24.749	20.7376	20.7774	24.2013	22.7742	24.0676	28.626	23.8505	30.8448	21.1816	22.8755	25.0919	25.5506	27.4206	23.2309	22.3684	21.9189	24.552	20.1257	23.3614	27.0321	22.4909	26.9774	19.9672	0	26.6118	25.7149	0	0	24.885	23.2238	23.2029	23.258	24.2958	24.8452	30.8941	18.3803	0
25.1522	24.6623	19.9172	0	25.704	0	0	21.8951	27.0309	37.2219	31.6288	25.2199	26.0728	24.3279	21.9585	26.1761	25.5572	25.8319	26.2815	23.6564	27.2917	22.4915	28.5526	26.772	26.5467	24.1481	0	0	24.5773	27.7625	25.3726	23.3095	23.9933	24.4337	27.4725	22.1921	0	25.0443	21.019	24.3356	0	24.3383	23.6641	21.8154	20.5969	20.2573	21.217	33.5083	25.9147	21.3445
24.822	25.2641	20.9486	19.6258	26.5704	0	0	22.1004	28.6731	36.3672	32.7173	23.9113	26.7671	25.2867	24.6005	27.4049	26.3488	25.179	27.8414	24.7219	27.3133	24.2264	28.503	27.0527	26.2064	25.1719	21.6551	0	24.789	27.9172	24.5681	24.5165	25.3333	22.7278	27.9936	22.7827	0	24.8631	20.3284	26.0043	0	24.6511	23.851	23.1436	19.9718	0	24.3207	34.099	24.3863	22.2107
24.5435	25.6677	20.6394	21.6032	25.1836	22.2149	22.1483	21.9799	26.2037	36.5485	30.2476	24.6992	26.0584	23.3227	21.6088	26.543	24.2207	26.9434	29.2273	23.8981	28.5385	20.3566	26.2636	27.9607	26.6077	27.4854	22.9354	23.077	22.621	26.6588	24.4914	22.9602	26.2687	22.6588	28.28	21.508	0	26.5377	22.4138	24.7631	0	23.442	23.5696	23.1491	20.3786	23.8082	24.0393	31.8111	25.1477	24.0539
25.1163	26.8789	20.9821	19.9405	25.6625	0	0	23.9131	28.0223	36.7541	32.8298	24.2977	26.0967	25.5708	22.7468	27.7696	26.1145	27.4786	26.8455	25.0022	28.0187	21.5305	27.5742	27.5665	26.6732	26.0433	21.44	0	25.4746	27.476	25.4863	25.1444	24.677	23.2195	29.0027	23.8262	0	23.2128	22.2621	24.7453	19.7887	23.9282	24.191	21.8931	19.8063	0	22.3582	34.2655	24.6441	20.6926
25.5936	23.8509	19.2182	20.8938	25.364	0	0	24.1462	26.0486	39.1388	30.4468	24.8361	25.8975	24.2842	23.341	28.1015	24.9212	25.4569	27.5123	23.921	26.3316	23.6965	27.6389	28.8623	26.2463	23.2656	0	0	23.862	27.8901	25.5952	23.2198	23.5213	23.6546	27.6974	23.6616	20.6375	24.261	0	26.0674	0	24.0585	23.2404	21.3004	18.9211	0	0	31.9236	24.9847	22.3205
25.0668	27.6424	21.4898	0	25.4718	19.4331	0	23.9583	26.4153	38.2074	31.4556	25.1128	25.7709	25.0175	22.8473	26.7524	25.5712	27.4691	26.4284	24.6437	27.9449	21.8117	27.8423	27.5815	26.9889	26.3237	18.3288	0	24.3175	27.1614	24.8585	24.6389	24.513	23.3986	28.5606	24.086	0	23.0461	0	25.3207	19.5589	23.7477	25.293	21.73	20.2238	0	21.2689	33.0578	24.1941	23.2604
25.9611	19.7255	19.9713	19.9178	25.3017	0	0	22.4464	24.1643	34.2401	28.4568	24.4702	25.5675	21.8534	21.1223	25.0521	23.4376	23.4016	26.1501	23.3978	25.5947	21.217	27.2006	24.6018	25.5864	23.8063	20.4396	0	21.0801	26.3626	22.9763	0	22.8997	22.9538	28.1713	20.9431	19.7241	25.0093	19.7213	21.9665	0	23.0888	22.34	21.2414	20.6947	0	22.9294	30.2791	21.1172	0
24.8763	21.4759	19.0816	0	24.4149	0	0	17.2997	25.269	31.1933	29.5808	23.6215	26.5971	22.1495	19.7294	25.8116	23.8299	22.1684	27.5513	22.192	27.8972	22.0859	23.104	22.8033	24.9074	23.5076	22.1447	21.1694	22.0141	24.2099	24.9324	23.0074	25.2521	21.3364	25.5131	21.2405	0	25.5688	20.9755	22.2076	0	24.5433	20.9806	21.5383	20.864	0	21.5934	31.0669	23.5811	20.6972
23.8524	24.9512	20.1723	20.0129	25.2004	19.7244	17.457	21.6558	25.6735	35.5802	30.4779	23.0654	26.065	23.7476	22.0394	26.5045	24.4074	24.9478	26.4601	23.257	28.5222	21.4087	26.7788	25.2876	25.2345	26.0649	21.715	0	23.353	26.7572	21.8161	23.4509	25.1427	22.3965	26.8644	22.372	0	22.1744	20.0308	22.0596	0	22.7139	22.4113	21.9617	21.5603	24.11	24.9772	31.6145	23.2821	0
23.7867	25.8079	20.1992	20.7388	24.4114	20.8041	19.9364	23.3207	25.7379	36.3408	30.2495	25.4898	25.5093	23.14	20.8646	25.5038	23.9029	27.3586	29.3152	25.2691	28.8228	22.6841	25.0522	26.7856	26.4405	28.6375	22.5671	21.9752	22.8513	26.4014	23.0719	22.413	26.9694	23.1188	29.9706	21.5523	19.8345	25.6271	23.7532	22.7811	18.9144	24.7148	24.0053	23.0522	21.7179	23.4012	23.9868	31.5387	24.0579	19.9112
23.6582	24.4728	20.7105	0	24.459	0	21.2084	21.1263	27.8432	35.7399	32.5309	23.9717	24.2038	25.4708	24.4387	28.3416	26.517	26.608	28.8963	25.7885	27.9081	24.0455	26.3181	26.1082	25.7474	25.8963	0	0	25.2074	25.672	24.4536	25.2251	25.1503	21.2344	27.6549	21.7333	22.2279	25.4864	21.9739	24.5851	0	23.0482	23.3082	23.6705	19.5921	0	21.5935	33.7559	23.4546	0
24.0512	25.3412	20.1819	0	24.5606	0	21.0303	19.9641	25.7688	36.0225	29.5087	23.6561	25.852	21.9558	24.4871	25.5608	22.3919	25.3598	28.4228	24.396	27.8888	22.0203	26.6101	27.0463	25.314	25.7571	0	21.2406	21.9812	26.066	24.2537	22.6187	24.5348	22.8072	27.9386	20.6175	0	26.2539	22.8125	26.2715	0	23.9138	23.4359	20.961	21.1821	0	25.4028	31.6203	21.8856	0
24.1045	24.7957	19.1947	0	24.5819	0	16.2956	22.9681	26.4347	35.2651	31.1797	22.9708	24.8176	24.4112	21.7058	25.441	25.3335	23.4482	26.0981	22.5028	27.5462	20.8315	26.6323	26.2873	25.3088	24.2687	22.2415	0	24.1563	25.8434	22.6852	24.1957	24.8685	22.925	27.1471	22.4965	17.7531	26.1803	19.7881	22.9782	17.5391	22.6206	22.4876	22.1469	20.8148	20.7005	22.4515	32.5361	23.4806	0
24.1497	22.7114	18.4469	0	22.2969	0	0	0	24.9648	27.1744	29.374	24.3681	26.7832	22.0909	18.5098	24.48	23.3445	20.7678	29.3431	21.5901	23.293	20.5731	27.4104	26.064	24.4366	23.9811	20.2372	0	22.0976	24.9613	21.4819	22.8187	23.6431	23.8447	24.2144	0	0	21.229	22.8474	21.1304	0	20.5626	20.2449	20.3129	19.5382	0	23.4542	30.6117	22.4407	21.3018
23.6725	22.9092	21.9684	20.6653	26.2577	21.3674	0	22.1296	27.8576	37.3549	31.9344	26.1602	23.8969	24.8391	23.0524	26.8975	26.1801	25.133	27.3296	23.9605	27.765	23.527	26.9785	26.7581	26.9042	28.3551	20.2558	0	24.4955	28.4112	24.8864	24.7264	25.2773	23.6597	29.9365	23.4684	22.0786	23.9685	20.8615	22.7641	18.9163	24.8077	24.227	21.2507	21.0139	24.791	22.9186	33.2278	27.0738	26.2174
24.5518	24.5901	0	0	25.3285	0	0	0	26.5714	37.7811	31.4607	25.4567	25.1741	24.3743	22.4805	27.2095	25.9488	25.7244	27.3841	24.5533	27.1385	22.9026	27.988	27.9242	26.1135	26.9906	0	0	23.9797	28.3703	24.4987	23.9493	23.2985	23.6314	28.1652	0	0	25.341	0	23.6644	0	24.3515	23.1652	19.9153	0	21.4974	23.9932	32.9462	24.539	20.1371
23.2427	24.0195	19.939	0	24.9435	0	0	0	27.955	35.486	32.6284	25.089	23.4262	25.5538	23.5628	27.6066	27.0499	25.186	27.5169	23.8823	27.3545	23.7399	27.9433	25.5193	25.9891	25.2484	21.1247	0	25.3012	26.3481	25.1547	25.0575	23.868	23.7658	26.4611	21.7032	0	24.4448	22.519	21.7164	17.9928	24.6937	22.8465	19.9365	21.906	22.6237	23.9915	34.2225	26.4868	23.1647
24.7142	22.397	18.8357	0	24.394	0	16.3594	19.2524	29.484	34.4383	33.6635	25.2351	26.3353	27.2382	23.7136	26.8466	28.6138	24.5558	27.7172	23.2456	27.1536	22.9421	26.7379	26.9135	25.74	24.1546	0	23.7163	26.8797	26.6921	24.124	26.7766	24.2782	23.5755	26.5639	22.2262	0	25.7702	23.2051	25.5599	0	24.8494	22.8545	21.3972	20.1823	21.333	22.2065	34.9906	26.3333	22.433
25.5679	22.1649	21.0439	0	25.168	0	0	0	27.8744	33.3458	33.2476	25.5789	25.3649	26.03	23.3721	28.572	27.4289	26.5705	27.5179	25.2973	27.0771	22.8238	27.9553	24.5703	26.9899	24.3822	20.4395	0	26.0703	26.2034	24.6091	25.2722	23.5883	22.5362	27.4862	22.7255	0	24.6065	22.1361	23.8449	0	24.6784	22.7957	20.6642	21.339	22.3578	22.7266	34.6504	27.159	24.0198
26.0733	21.7715	18.4926	20.2046	26.501	22.1454	0	0	25.7299	31.0253	29.8268	25.4951	27.8141	22.9783	20.7987	25.6605	24.0103	23.1333	26.4001	22.6696	24.7728	21.6782	25.6785	25.7364	26.048	22.9717	18.6749	0	22.8446	27.3745	19.9656	22.173	23.1702	22.1295	25.8303	18.094	18.6368	23.9854	22.5463	0	0	21.797	21.5649	0	20.6025	0	24.3966	31.1129	23.7425	19.9184
24.2993	24.2406	20.5079	20.6345	25.3607	21.9796	0	23.9759	26.2091	36.5707	32.7393	25.6164	27.8418	25.5911	24.091	27.8928	26.53	25.9582	28.853	25.0186	28.0112	24.4895	25.2746	26.6375	26.8997	25.3084	0	0	25.4302	25.7304	23.4386	25.214	25.4166	21.6704	27.8262	19.4015	22.3241	25.6659	20.8031	24.0773	17.5254	24.5427	21.7659	23.4968	20.4432	0	21.8443	33.8669	26.5516	23.1296
25.1545	23.7826	21.1427	17.8483	24.081	20.7913	0	19.0867	28.4404	32.6479	32.2127	24.8888	22.0759	25.0716	21.999	26.8908	26.4752	23.3245	27.4781	23.732	28.0274	23.3802	27.8405	22.3285	26.2464	25.4332	19.1851	0	24.6806	26.5071	26.3186	24.6471	25.6101	22.83	27.0459	22.4302	22.2563	24.4817	25.349	0	0	24.4476	23.1836	0	20.5041	20.5871	24.5131	33.5589	25.0342	21.0477
23.7469	22.768	19.1167	0	24.9114	0	0	21.083	27.3078	37.5493	31.6323	23.3298	25.3898	25.153	23.1832	26.7562	25.83	25.9002	27.0448	24.2156	27.0724	22.5076	26.8176	26.0255	25.6569	25.441	0	0	25.1915	27.0448	25.2028	25.0276	24.3907	22.1435	27.189	22.5839	0	25.236	22.2134	23.9183	0	23.2359	23.1878	21.3828	20.2207	21.515	21.1533	33.4831	26.0189	22.4131
25.6201	20.7455	20.3612	19.6032	25.992	21.5122	0	21.2967	30.4177	30.5111	34.4842	24.1885	24.0588	27.4223	24.2826	28.1989	28.4609	25.0163	27.7265	23.3297	25.3852	24.1245	29.3961	24.5399	25.5552	23.6072	20.7618	0	27.074	28.0665	23.9641	26.9975	23.2583	24.2157	25.8993	21.4219	0	25.8622	0	23.2581	0	24.1069	23.527	20.2196	20.6436	0	21.8222	35.4753	26.0245	20.5748
24.2441	23.5708	19.6904	18.974	25.5289	22.2433	0	22.1741	29.0102	38.5061	33.3645	23.6325	25.6838	26.3683	23.7788	28.2286	27.3193	25.7404	27.6305	23.3172	26.7765	22.7938	27.8634	26.433	26.2033	26.1629	19.9939	0	25.7633	26.6508	25.2037	26.0977	23.7816	22.7772	27.0386	23.5166	0	23.8921	0	26.3683	0	23.1832	22.8607	0	21.221	0	22.1864	34.1987	27.8019	26.7669
25.2911	25.0506	18.8532	0	25.7894	0	0	20.7504	24.5801	38.3439	29.0632	25.7101	26.6877	22.6038	21.8786	25.8678	22.4196	25.0647	26.823	24.122	26.2152	23.2651	28.7056	28.2139	26.7901	24.596	20.6594	0	21.5018	27.7463	24.5351	24.1197	25.2198	23.7967	27.61	22.5647	0	26.1792	21.749	25.65	0	24.8262	23.5262	21.3624	20.2876	0	22.2864	30.5769	21.648	0
26.2578	21.4707	18.8673	0	26.907	0	0	0	27.2484	33.5957	31.7404	25.5762	24.6476	24.8266	22.2011	26.9874	25.9354	25.2092	27.4	23.6192	26.2744	22.7216	28.7525	24.1073	26.4899	25.6865	19.2347	0	24.4064	27.9523	25.5731	23.9908	23.1075	23.1562	25.8732	24.0625	0	24.8339	0	26.9765	0	24.5245	22.6691	0	19.4896	22.7693	21.0955	32.8915	22.949	0
23.6152	25.1805	20.5807	0	24.1233	0	17.9258	21.9302	30.0475	33.9421	35.2392	23.428	24.7865	28.2077	21.9355	26.283	29.2747	24.4009	27.3115	24.4121	27.808	23.5906	25.85	26.4779	25.4003	26.8459	21.1149	0	27.157	25.6425	23.9299	27.4832	24.3923	22.1399	27.4257	21.6618	0	25.3884	24.1646	19.9689	0	24.1557	22.6111	0	22.572	24.1427	24.1122	36.4308	27.3239	24.492
26.2556	23.0227	18.9283	0	25.7958	0	0	21.4409	27.162	36.4309	32.1955	24.5207	24.4135	25.1875	23.0113	27.5488	25.7921	25.3609	27.8722	24.369	26.9448	23.7646	28.2164	25.546	26.1263	24.8354	0	0	24.3866	28.6922	23.7776	24.3878	24.6008	23.408	25.7356	21.3985	0	24.9764	20.4057	25.2659	19.685	24.9944	22.9709	20.3279	20.5139	0	21.4605	32.9672	26.0248	22.53
24.2242	26.9936	22.1172	0	24.5942	0	19.5958	0	25.1035	36.7875	29.5188	24.0482	25.9017	22.1476	20.2055	24.633	23.8669	22.8142	26.4807	23.0873	27.6529	20.4329	26.7617	27.8296	25.1915	25.1067	19.9973	0	24.9785	25.9071	23.9336	27.4367	24.7923	22.5793	30.6792	22.5246	0	27.0412	22.4095	23.916	0	24.0808	24.3625	20.0558	19.8668	0	22.3425	31.3523	21.7543	21.1037
24.4626	24.1975	19.6443	20.7073	24.2347	0	21.1903	0	30.6232	33.9383	34.9452	25.1962	26.1807	27.9449	24.5763	29.0482	28.784	27.2272	28.7013	25.5301	26.6356	24.4595	27.6852	25.3389	26.7841	25.1201	0	0	27.4038	27.1443	24.4751	27.6433	23.8045	23.7474	28.166	22.2634	23.2969	26.0199	0	23.1354	0	22.7426	23.0297	19.6881	20.0809	0	20.6466	36.2221	28.7507	24.4901
25.9539	24.2703	18.5027	0	26.7915	0	0	0	24.0326	34.5712	28.5617	23.3825	25.1142	24.9599	20.135	24.1566	23.7759	22.6793	25.565	22.1711	25.4046	20.96	28.8469	25.1187	25.1092	24.729	20.9599	0	22.0357	29.2537	21.6983	22.7442	23.2716	23.2495	25.8126	20.0562	0	25.0576	0	28.5918	0	22.7545	24.0553	0	19.7803	0	22.4154	30.0754	20.5815	0
25.2207	26.1027	20.2661	0	24.9717	18.2893	16.3044	24.396	27.8442	37.5049	32.1267	26.2128	26.8139	25.1604	23.9332	27.2056	25.9159	28.0723	27.0198	26.4772	27.7268	23.0796	27.5864	27.8331	27.6272	26.26	21.0338	0	24.9017	25.9436	25.1664	24.8389	24.9886	24.612	28.5185	22.408	19.9725	23.6266	22.4983	25.0414	18.7353	24.2091	23.2277	21.5924	20.1106	20.1535	23.3911	33.8126	22.3676	0
25.4044	25.4951	20.0848	0	25.4703	0	16.7224	0	24.4897	36.4157	29.0301	24.6812	27.0669	23.8428	18.9598	24.4547	23.0851	22.8332	25.0085	22.8829	26.7765	22.4023	27.8993	26.857	25.6877	24.1938	0	0	22.1866	27.5752	23.3542	22.4159	22.9989	24.1291	28.1621	20.9751	20.3273	22.2685	20.4153	25.2367	0	23.8419	23.6257	0	19.8925	0	24.0099	30.6331	20.8795	0
24.9016	24.6984	20.6723	20.2135	24.5576	20.1501	15.4829	0	23.9194	36.0854	28.5366	23.9508	21.5937	21.8294	20.737	24.9997	22.0723	22.5835	25.7402	22.2136	27.711	21.5761	26.4775	25.511	24.8118	26.7642	21.7768	20.6955	22.1472	26.6436	20.3679	22.2815	25.0633	23.2498	26.8295	19.2926	18.466	24.4416	21.7187	0	0	22.7164	23.5918	0	21.9459	23.7212	25.2626	29.8865	22.1934	0
25.2587	25.2497	20.1958	19.9304	26.3198	0	0	22.9951	25.9613	36.8683	30.5445	24.9557	25.3154	23.805	21.8361	26.6149	24.4353	25.6108	26.5402	23.1954	26.7458	21.0131	28.2544	27.8171	26.6774	23.8242	21.1385	0	23.24	27.9518	25.6823	23.6125	23.9878	23.1416	26.9409	23.4929	0	24.0598	20.1387	25.9794	0	23.7627	23.6478	21.3217	20.4329	20.7488	22.7729	32.0904	21.301	0
25.5584	20.7695	20.3149	0	24.6389	0	0	23.031	24.8811	33.9852	29.7073	24.1418	25.2603	22.4699	20.6126	25.5481	23.4043	23.1697	25.8076	22.6905	26.6955	21.8744	25.3374	24.7143	25.7993	25.7337	19.9923	20.3965	22.2297	28.2471	22.5075	21.7723	23.4268	22.0993	27.932	19.5583	20.8181	23.7161	20.4151	22.0114	0	23.8652	22.3006	21.384	20.7902	0	22.6368	31.2021	24.6057	23.3383
24.9007	26.456	20.1626	19.2006	25.8753	0	0	23.5809	28.7934	36.3862	33.0048	25.6734	25.5791	25.8972	22.5062	27.4421	27.0636	26.2944	27.4364	24.0018	27.6576	22.9793	28.2006	26.1986	25.7466	25.8242	20.3104	0	25.6371	26.9626	25.4723	25.5075	25.1797	23.5227	27.5479	22.6577	18.8905	24.2245	22.0013	23.8137	19.3042	24.8429	24.2379	22.3064	20.6832	21.7355	21.9511	34.3865	26.4829	23.2557
25.4562	28.6088	23.7212	0	25.9803	0	0	0	26.679	38.6401	31.2253	26.0455	26.6266	23.5565	22.9777	28.7739	25.6794	26.5818	28.1501	25.1077	26.8069	24.1571	27.7453	28.2068	26.4303	25.7413	0	0	23.8308	28.7922	22.7602	24.7373	24.0817	25.2113	30.5045	23.0043	0	26.2773	0	25.3507	21.6397	25.0835	25.948	0	0	0	23.5151	32.4615	23.345	22.2936
25.9684	24.2525	19.7841	19.5236	25.6249	0	0	20.3966	27.1242	36.9226	31.6879	25.5221	26.4843	24.5253	23.8339	27.2765	25.5133	25.2823	27.2832	23.8664	27.2016	23.2667	27.2999	26.4856	27.0894	24.8545	0	0	24.3534	28.8675	24.3379	23.9116	24.6474	23.4107	26.5365	23.7337	19.0723	24.5234	0	25.8966	0	24.2133	23.76	0	20.8223	0	21.8181	33.2055	22.8343	19.0168
25.1248	24.773	0	0	24.2906	0	0	22.8742	27.0689	37.3106	31.9235	24.5745	27.1958	25.3581	23.0273	27.4274	26.4508	26.1622	26.4343	24.3799	25.5682	22.7051	27.043	27.7448	25.5351	25.1725	0	0	25.0783	27.7839	24.3504	24.9668	23.9246	23.1886	26.7738	22.702	0	23.0035	22.2269	26.0021	0	23.3309	23.1827	0	0	0	22.9214	32.6501	27.4884	26.4237
0	22.9016	0	22.0371	21.9922	23.1049	21.9365	20.9818	24.3905	28.8285	29.1903	23.5577	25.562	21.9614	20.2677	25.3233	23.5743	23.9409	30.9423	22.6958	30.2775	19.7675	0	21.0941	24.6388	29.9544	24.2166	24.2206	21.5596	24.3644	0	22.3999	26.8208	20.2742	25.5266	0	0	26.7787	24.8127	0	18.1419	22.493	21.1046	24.5397	22.8757	23.8172	23.9045	30.2802	22.7656	20.7135
22.0359	25.6532	21.6428	22.7335	23.5051	22.568	22.3646	0	25.2452	34.8427	29.767	23.9032	24.0748	22.587	20.555	25.076	23.563	25.4336	31.9656	23.169	30.2114	22.4326	0	23.1252	25.2018	29.6012	22.966	24.0019	23.0995	24.4882	23.2241	22.8446	26.5959	21.5067	27.8989	0	0	27.4229	24.4681	21.9013	18.9779	23.6219	22.5874	24.4717	21.3842	25.3012	25.9372	30.5741	23.0015	20.8065
25.7541	23.676	20.4162	0	25.1175	0	0	24.5726	27.7818	36.832	32.0698	23.4314	26.1907	25.1366	23.7367	27.6795	25.9785	25.2954	26.7864	23.9772	26.9638	22.2859	26.0459	26.8368	25.4753	24.2163	20.2117	0	25.2217	25.3658	25.9335	24.9388	23.4087	22.8729	27.0627	22.7202	19.2675	24.9978	0	24.0871	0	24.0527	23.298	21.6861	20.0706	0	22.2741	33.3623	23.8027	20.759
24.9144	21.9824	19.6218	20.1526	24.933	0	22.8926	22.4137	26.8214	35.2709	31.292	25.2301	25.071	24.095	22.5646	27.8185	25.2284	25.4927	28.4372	24.704	27.5137	23.1901	27.08	24.9654	26.2431	24.9662	20.4188	0	23.8864	27.248	23.8205	24.4504	24.4558	23.3668	26.5504	23.4175	0	25.6298	23.4551	23.9402	0	24.7339	22.2937	24.6251	20.3351	21.497	23.1906	32.3425	26.1342	24.4436
25.0175	20.5948	19.112	22.2809	24.2047	20.8082	18.8727	0	25.7301	34.1005	30.8407	22.9347	25.6279	23.9579	21.1876	25.7094	24.7311	24.1318	31.3795	22.9433	28.0113	21.9435	23.8864	24.374	24.724	27.757	22.4994	22.2048	23.4084	25.9034	22.3324	23.293	27.1765	21.5658	25.8037	0	0	25.5983	25.2007	25.744	0	23.8033	22.2453	20.6005	21.5542	23.5452	23.989	32.5971	23.673	20.1844
24.6815	22.5069	19.6309	0	25.4641	0	18.9123	20.969	25.4837	37.4806	29.9826	24.3723	26.0304	24.7612	23.666	27.8994	22.8343	27.4852	27.8284	25.2676	26.6708	24.1805	28.3236	23.8195	26.3174	25.6206	0	0	23.5641	27.2965	22.3606	24.2672	24.1536	23.1848	26.423	22.6824	22.1832	25.4868	22.0853	23.7335	0	23.7027	23.6052	22.3269	20.4971	0	23.5171	31.0096	22.4018	22.2581
25.2533	24.3395	0	0	25.8026	0	0	22.942	25.987	38.3324	30.2745	24.0206	25.6483	23.5945	21.905	25.7838	23.8842	24.931	25.9718	23.7753	26.7044	21.9836	27.8348	27.6511	26.9645	25.3254	0	0	24.8463	27.7017	25.9924	24.1911	23.1971	22.1772	27.4048	24.4639	0	0	0	26.2157	0	24.2282	23.9442	0	20.6587	0	22.231	31.3278	24.4644	0
25.5492	28.54	22.4165	18.3075	26.1978	0	0	23.7813	27.975	37.337	32.61	25.0247	26.1808	25.2434	22.9108	27.3402	26.1324	26.0699	26.9427	24.4624	27.8308	23.1247	28.4377	27.6368	26.9784	26.6764	21.0391	0	25.0484	27.2443	25.1484	24.7673	25.1562	23.1414	29.1202	23.2354	0	0	23.132	25.5759	21.4749	24.1873	25.7488	21.4923	20.1658	24.0546	22.7212	34.2036	23.3464	0
24.4549	20.321	18.0662	19.8587	25.3828	0	0	0	24.5689	32.3119	28.9363	23.8323	25.1068	22.6182	20.8671	24.2731	22.8112	21.191	24.5893	20.9164	27.0446	21.0846	24.4254	26.0012	25.338	26.0571	21.347	20.8247	21.2348	26.9822	23.7008	22.4678	23.0945	23.8102	23.9789	22.1931	0	23.8963	21.1756	25.7079	0	24.8887	21.7356	0	22.1952	19.5703	24.6213	30.3492	21.9304	0
26.1737	22.1607	19.5052	0	26.6178	0	0	0	26.4924	35.0281	30.6619	24.6964	24.6849	23.6003	23.5162	26.5357	24.5509	24.2904	28.0092	23.1587	25.6544	23.1508	28.4824	26.4527	26.5435	23.7436	20.3838	0	23.3559	28.3565	23.3004	22.9187	24.0103	24.1625	26.1873	22.8307	0	25.8947	21.097	26.9615	0	24.5637	23.0068	20.482	20.1041	0	22.1824	31.7968	22.7827	0
25.5782	23.6225	19.5433	0	25.8736	0	19.615	22.1273	26.5625	36.8598	31.3033	25.2665	26.2527	23.8894	21.8353	26.2431	24.7481	26.6047	26.107	24.7068	26.9566	23.0506	28.5115	26.2645	26.8964	24.3697	0	0	23.6394	27.8163	24.2962	23.8888	23.6681	24.6	27.2259	22.3888	22.7911	22.9523	20.8898	25.9466	0	24.4748	22.7378	22.1517	20.2941	20.8982	20.1765	32.5544	23.1894	21.0603
25.0881	25.1462	20.9482	0	25.6129	0	16.0255	0	27.6172	37.2469	31.9137	24.669	25.1345	24.6027	20.5195	25.0908	25.8189	24.3335	26.3827	23.1309	27.0433	22.6413	27.2845	26.7594	25.4174	25.8092	21.7816	0	24.5218	26.6998	23.0249	23.9743	23.6137	23.9265	28.9531	21.0593	0	22.4311	23.7307	22.144	0	24.1093	23.9083	20.2098	21.9753	20.2507	24.9953	33.2162	25.5761	22.3675
23.5393	24.4196	20.3535	19.2304	24.7937	0	18.2427	21.9554	26.7738	34.7218	31.3978	24.5518	24.6601	24.4139	23.2039	28.2253	25.2721	25.8853	28.06	24.2539	28.6615	24.1997	24.2843	23.2982	26.3849	25.8657	21.1457	0	24.244	26.1555	23.0584	23.661	23.4617	23.4835	27.8044	23.2607	0	26.0316	19.612	22.6583	18.6658	25.0515	22.9535	21.466	21.8362	25.8379	23.0755	32.5888	24.3226	22.3567
25.1829	26.715	21.1095	20.8426	24.9883	0	20.9806	24.4003	29.0163	36.4094	33.1448	24.0683	26.3283	26.4324	21.8694	27.2227	28.0267	24.7054	28.1721	23.9228	28.3262	23.5603	25.1686	26.7246	25.8147	25.391	21.8163	21.5503	26.3534	26.8665	23.6811	25.8974	24.7505	22.9614	28.3319	21.6301	0	24.9654	22.6345	23.1145	0	24.7802	23.6121	21.2524	21.2361	20.3241	25.7918	34.9879	26.2474	24.1141
23.7307	21.9326	19.8367	22.8291	22.3382	21.7407	21.6948	0	25.7446	33.908	30.4578	23.068	22.7246	23.0145	22.9397	27.3263	24.5311	23.632	30.6636	23.0335	29.6877	22.9054	23.6081	20.5579	24.0459	28.4215	23.9258	22.3552	22.9452	24.3674	0	22.7985	27.5291	21.2006	27.1007	0	0	25.8198	24.6304	22.0004	0	21.1269	22.249	23.2774	23.1566	24.4994	25.8594	31.5313	23.8706	22.7653
25.3911	25.6568	20.2095	18.8921	24.9823	20.9573	0	0	23.442	36.6547	28.0305	24.0948	27.0455	0	18.7112	24.8817	21.6543	23.2906	25.0139	22.7368	27.7232	21.5753	28.4155	27.1428	25.2595	23.1425	21.2048	0	21.6489	25.4834	0	22.9076	23.428	24.4598	25.6504	18.4052	0	23.927	23.5297	24.6302	0	22.3987	23.4659	0	21.7983	19.5038	25.5025	29.7721	20.4768	0
23.7304	0	21.8664	19.1581	26.3037	0	0	0	25.8719	36.2723	29.4832	25.385	23.5329	22.3283	21.173	25.7408	23.7657	24.4557	26.1831	22.836	24.9563	22.4323	27.0943	26.1039	26.4338	28.6544	20.5189	0	22.7519	29.5872	25.7461	21.6533	23.0396	24.3923	28.3349	23.2898	19.1798	24.0528	0	23.0538	21.1346	23.8422	24.1243	0	19.9325	25.951	22.3841	31.3572	24.1514	22.3067
23.2444	22.7588	20.1166	22.9121	25.0138	0	19.1839	24.8083	27.1847	33.9191	30.9495	24.2193	24.1282	23.8161	20.9966	25.6325	24.0609	24.5572	26.816	23.0303	27.8843	20.7845	27.2184	25.5042	26.1766	24.9671	21.3016	0	24.1779	26.573	23.852	24.1914	23.8025	22.6257	26.3633	21.571	17.5412	26.5949	21.2319	25.3988	0	23.6779	22.3558	20.9114	21.4784	24.4812	23.0689	32.0425	22.5481	0
23.0821	23.9702	19.0197	19.4272	25.2247	19.4629	0	0	25.2908	34.4053	28.915	23.2395	22.7188	22.3029	20.6608	25.1713	23.0295	22.3924	26.4326	22.5699	28.6283	21.3314	26.5908	23.7708	24.8433	24.7664	22.0911	0	21.5751	27.2018	21.8431	21.7149	24.3173	22.7838	25.8384	20.3848	0	24.9885	22.326	23.6322	0	23.5982	22.5011	0	22.0526	25.3447	24.9957	30.8243	22.215	0
23.3508	20.4864	15.99	19.0107	25.8517	0	0	0	24.5553	31.4249	28.5645	22.753	22.3624	22.4119	20.3975	25.2129	23.6848	23.1226	26.0431	23.1756	27.6165	21.8223	26.1155	25.1398	24.9235	25.6468	21.8417	21.8965	21.8361	26.211	24.3982	21.8354	23.99	23.3352	24.1492	20.9479	18.7645	21.4422	21.0635	22.7134	0	23.3363	22.1217	20.0778	22.7261	23.4778	25.6781	30.0604	21.6169	19.0708
24.8115	28.8496	22.746	0	25.5156	0	20.7111	23.7619	27.5394	37.8484	31.0699	25.4676	26.3672	22.7464	21.6879	27.5056	24.9151	28.081	27.1004	25.4215	28.1737	21.0177	28.2756	27.6878	26.6169	27.2824	22.0504	0	23.6457	26.379	25.4552	23.7076	24.8379	23.3288	29.8991	23.5827	0	0	22.0196	24.8486	20.9351	23.9058	26.4988	19.9143	21.0546	0	22.8178	32.9339	24.2111	0
24.0945	27.7454	20.7878	18.0151	25.3327	0	0	23.9083	27.6713	38.1054	31.7168	23.8714	26.7381	24.6412	22.8797	26.554	25.1432	27.9185	25.8706	25.2311	26.2102	20.8559	27.8316	28.2936	26.7913	25.9565	21.6699	0	23.7432	27.0794	25.9113	24.4327	23.7512	22.8042	28.7668	23.6144	0	0	20.6662	26.7125	18.8237	23.0494	25.1931	20.2469	20.9312	0	22.9078	33.163	23.6598	0
23.7429	22.3685	19.9648	0	24.9908	0	0	23.2497	26.7765	32.938	31.806	23.2302	25.7117	24.3991	22.3487	26.4996	24.9531	23.1533	26.8171	23.4292	26.5344	22.1742	27.7383	24.9513	25.9894	23.6282	21.8452	0	24.4233	28.4082	24.7609	23.4479	23.4411	22.8996	25.582	22.3423	20.7965	25.3605	0	26.7655	0	24.0044	22.5342	22.7266	19.6663	0	24.3737	32.763	23.1776	20.2553
24.1662	22.757	20.4824	0	25.5014	0	0	19.5161	28.2061	34.279	31.9103	25.9647	26.8976	25.2147	22.3276	28.7325	25.9716	26.2112	27.4274	24.7008	26.1076	22.6108	28.4689	25.124	26.98	24.9276	20.6827	0	25.1042	26.1609	23.7148	24.5761	23.9571	23.5215	26.6292	22.7159	0	25.4234	21.7867	24.6556	20.2379	24.6075	23.6338	20.9706	20.2174	0	23.4761	33.4223	25.9195	22.217
24.0723	21.5326	19.4456	16.5137	24.9773	0	0	0	23.5917	34.6888	28.6574	22.7087	24.426	0	19.3473	23.7406	22.4903	22.0328	25.1813	21.1145	26.6365	20.1197	24.7011	25.7383	24.1188	24.7875	21.4452	0	22.2923	27.8503	0	24.013	22.2305	23.188	26.5359	0	0	25.7769	18.2265	20.7386	0	21.6104	22.4237	0	22.0292	23.5765	26.1922	29.319	22.4118	20.5463
23.8377	0	19.0599	19.3502	24.1079	20.8769	16.2561	0	25.326	28.0301	29.7707	25.6452	28.3028	22.9585	20.2705	26.4585	23.3559	22.3744	26.2062	22.9293	25.8401	21.2184	26.3698	25.7393	26.6646	22.4098	21.2289	22.0203	22.4819	27.8831	22.9836	22.0779	22.6476	24.3168	25.2716	20.5179	16.8085	23.9265	0	25.4897	0	23.5861	19.0104	20.7218	20.9162	0	24.9389	31.3539	23.0001	21.5662
24.2355	26.4465	21.5054	21.844	25.3102	22.2904	20.519	22.809	24.9593	37.2936	30.063	24.5943	25.2106	23.8008	23.0563	26.7015	23.9779	26.7112	27.8138	23.8552	28.2955	22.804	25.4559	26.5239	26.6195	25.9157	21.6533	0	23.847	24.5662	22.8844	22.3422	25.7281	21.64	27.5412	22.9599	0	23.5276	23.4865	24.6694	0	23.7402	24.7277	22.7821	22.1572	26.0553	23.8005	31.025	23.8698	19.5852
25.7404	25.7012	19.0778	0	24.7914	0	17.254	21.5662	26.6122	36.7628	30.6406	24.4668	26.5521	23.0509	23.1905	26.3872	24.4855	25.1529	26.04	24.6118	26.875	22.3803	27.9435	27.4636	26.0148	24.1529	24.1862	0	23.3293	26.6217	24.8593	23.5811	23.3669	24.4878	28.0234	21.9563	22.6321	24.742	0	24.8874	0	24.2258	23.9943	22.1929	19.4426	0	22.6849	32.3233	21.8444	0
25.0377	22.9467	19.833	21.6976	26.5004	22.8216	20.4228	22.5567	26.6478	35.9575	31.3399	24.7857	25.6999	23.9383	21.9937	27.0527	25.3321	24.3167	27.8661	24.1221	28.3325	22.8623	28.5315	26.295	26.324	25.4606	21.224	23.9412	24.2525	28.2596	26.1765	24.748	24.5636	24.4057	26.2122	23.1471	18.514	25.2681	21.2159	26.0954	0	24.5252	22.2438	21.882	21.311	22.1977	24.1972	32.5084	23.2304	20.5943
20.4016	23.2018	0	22.754	23.0795	22.4587	20.7735	20.6788	25.6057	31.8518	29.9252	23.4742	24.9565	23.0427	21.9506	25.6652	24.0804	24.8849	30.4881	22.7592	30.2309	20.9893	0	22.0573	24.6911	28.7634	23.5112	24.978	23.0197	24.8211	0	22.5273	26.7864	20.8653	25.7417	0	20.3661	26.4124	24.2608	20.3964	0	23.1129	22.3251	24.1843	21.9891	24.1987	24.9327	31.5286	23.5743	20.4235
24.5865	25.742	19.0896	19.8395	25.6205	0	0	22.0485	27.2702	36.8576	31.9966	23.9873	26.264	25.0791	21.6183	26.1002	25.805	26.159	26.0451	23.5428	28.3284	20.7443	26.6369	25.3218	26.0395	25.6477	22.2243	0	24.6164	26.5794	24.223	24.4668	25.2878	23.1471	30.3081	22.9226	0	24.6398	21.6569	24.3732	17.529	23.6068	22.8208	21.7923	21.752	22.9531	23.6904	33.3688	25.4537	22.8103
25.2033	28.0298	21.6631	0	26.2515	0	19.0445	22.6856	27.8849	37.6833	32.5961	25.3932	26.5331	25.3841	23.6268	27.3125	26.0333	27.9438	27.6894	25.5231	27.5778	21.7702	27.4164	27.8275	27.2615	27.1371	21.1066	0	25.1404	26.3986	25.7124	25.0186	24.6302	22.6659	30.2915	22.9767	0	0	18.4017	25.8481	19.5755	23.1209	25.965	22.0614	19.8567	0	24.1063	33.8229	25.5463	21.8352
25.9454	22.5293	19.633	17.9284	27.5002	0	0	0	27.207	33.2833	31.6909	24.9785	25.4381	24.8523	22.2207	27.387	25.6573	25.9202	27.666	24.1195	25.7588	22.5765	28.7779	24.5417	26.1127	25.9269	0	0	24.4117	29.2641	23.7128	24.1437	22.8946	24.7357	25.42	22.1346	18.9039	26.7377	21.0732	27.4551	20.0273	24.8441	22.7551	21.9723	19.756	0	20.6929	32.6257	25.8168	21.5064
25.9575	24.197	20.8484	20.2662	26.2004	0	0	22.1881	27.0561	38.0176	31.3161	26.9061	26.3167	23.2711	22.9057	26.045	24.4643	27.6417	26.7429	25.6467	26.7156	24.3746	27.8762	28.2787	27.9621	26.1308	21.1757	0	23.3127	28.2603	25.6625	23.6621	24.226	24.3707	28.4757	22.2284	20.8348	25.6666	0	24.823	19.8495	24.4201	24.3428	0	19.8337	24.0907	23.6088	32.7527	25.832	22.5391
23.6878	0	20.6309	0	22.5992	20.5031	17.3995	0	25.914	33.2551	30.6269	25.7901	25.0569	24.1134	22.8055	26.7266	24.6883	24.89	27.7136	22.9763	28.0747	22.7237	27.1196	25.7065	27.0394	28.5816	22.4053	22.8577	23.0411	25.5748	23.0897	23.3082	25.2487	25.5806	29.3145	24.4724	0	26.5944	26.0085	20.2392	19.1732	24.5967	25.0407	21.6239	21.0181	20.1974	26.4464	32.1773	23.8457	21.1378
24.4508	26.0189	20.2499	0	25.024	20.9737	20.0543	23.1854	26.3564	36.8516	30.6931	23.621	25.6667	24.9771	23.069	26.0785	24.473	25.4896	26.2676	23.3977	28.3446	21.7111	25.6146	26.9558	25.4083	25.1203	21.253	20.5609	23.7063	27.3414	23.5922	24.5159	25.1575	21.6392	29.1114	22.7581	0	24.5175	24.9179	25.4776	0	22.6803	23.6917	21.6959	21.2989	0	22.2636	32.3034	21.6439	0
24.8884	25.8987	20.4444	0	26.387	0	0	22.7325	28.3711	37.8541	33.1671	25.9673	25.655	25.7697	22.8441	27.5608	27.3402	26.116	27.1523	24.4488	27.1344	21.9923	27.994	26.8848	27.8314	24.8096	19.6705	0	25.7538	27.4047	24.809	25.2808	23.8576	23.6539	28.0621	23.0289	0	0	0	25.1451	0	24.6182	23.7573	20.8061	20.0933	0	22.5736	34.4341	27.955	23.0118
25.9839	20.4515	19.346	0	26.5722	0	0	0	29.338	33.2934	34.182	23.8506	24.6164	27.0305	23.3824	28.3678	27.8909	24.4911	27.3525	23.1746	25.435	23.346	27.7849	24.2983	25.9118	24.3821	0	20.5759	26.1413	28.0697	25.1977	26.0395	22.856	23.6124	24.8612	23.6149	0	23.6563	0	27.0575	18.0271	24.5716	23.171	0	19.3485	0	20.8751	35.1283	26.889	24.8215
24.091	25.072	19.6698	0	24.9203	0	0	23.2327	27.8447	37.8638	32.3458	24.5386	26.4587	25.3666	21.9139	27.0234	26.8101	26.0516	26.4637	22.6597	27.7045	21.2993	27.9838	27.372	25.5808	27.1254	21.3918	0	25.2857	26.5327	25.1246	24.2685	24.8353	22.3125	28.3725	23.8903	0	25.3824	18.9934	24.8527	18.2742	24.3869	22.6567	21.8093	21.3388	0	21.462	33.2448	24.2489	0
23.5919	23.2032	19.1499	20.4874	24.6134	20.0479	18.6491	18.3707	28.398	35.9674	32.5663	24.8509	24.4698	25.1363	23.5014	27.1796	26.3336	26.529	27.9575	26.334	28.3112	22.7424	23.8031	24.8894	26.3259	27.0543	21.888	20.3963	24.8971	27.3389	21.8496	24.6406	26.4545	22.8603	28.3708	19.7223	21.5896	25.7466	22.956	0	17.6093	24.9803	22.1416	21.4264	21.6824	24.604	25.3879	34.1112	26.3442	22.1467
22.9035	22.0941	19.0957	0	24.8201	0	0	21.4729	25.3538	33.995	30.1883	21.7161	21.9493	23.1375	20.6375	24.7674	22.5844	22.4482	25.7334	21.8569	27.9819	20.9608	24.6276	24.072	23.8005	26.2509	23.3735	21.2886	21.783	27.7773	23.6254	22.3275	23.3468	22.7912	25.0374	21.194	0	24.131	0	21.7086	0	22.8129	22.5294	0	21.7288	25.7551	25.2922	31.2679	22.5508	18.8051
24.8705	27.3116	21.4967	19.6164	24.772	23.7613	0	24.238	28.001	37.0677	32.4859	24.8235	25.4569	25.9868	24.3285	27.7915	26.4981	27.3272	27.2837	25.6745	27.5596	22.4336	26.7804	27.6075	26.6806	25.4707	0	0	25.5658	26.461	25.2977	25.4094	24.7786	22.8875	29.8646	22.5945	0	0	22.3966	23.7737	0	23.7705	24.3229	21.1815	19.6858	0	22.2666	34.4404	23.9137	22.7792
22.4914	23.327	19.1412	22.5011	22.7479	21.2343	22.6575	0	24.8914	32.7546	29.6291	23.1753	24.823	22.6152	19.914	24.962	23.8059	23.4026	31.056	22.6637	30.3224	21.0173	21.3762	21.2887	24.5365	29.5585	23.7542	24.0627	22.4138	25.1761	0	21.6813	27.3641	21.8032	27.4569	0	0	25.5903	24.9029	21.7508	0	23.1451	21.1638	24.3368	22.6475	22.9371	25.776	31.0026	22.103	0
20.8376	22.0977	0	22.6395	22.3331	21.7781	22.2611	20.1657	26.3405	31.5309	30.5873	22.9981	22.7626	23.1965	22.1044	25.4499	24.466	25.3725	30.547	21.777	29.7923	21.4548	0	23.9794	24.2502	28.923	23.0944	23.6184	22.8635	24.9629	0	22.8776	27.2133	21.6001	25.1251	0	0	27.2941	24.7645	0	0	22.995	20.7642	23.1076	22.7658	24.5428	24.8047	32.0734	23.0921	0
22.8866	28.2833	22.6406	22.2631	23.1061	22.1677	19.8944	21.4073	26.0149	37.1456	29.9506	25.1571	24.6495	22.826	20.3584	25.6329	24.7013	25.7293	33.0844	24.2308	30.1574	23.1999	24.9571	23.7251	25.8453	28.5807	24.0529	23.5395	22.5511	24.9358	22.5114	22.455	27.4297	21.8663	28.4565	0	0	27.8812	25.6784	21.7275	0	24.5855	25.0538	24.134	22.2998	24.1628	25.7617	31.7939	23.7169	19.0843
25.1535	25.9343	20.3672	19.7092	26.6524	0	18.9973	24.3935	25.6764	36.019	29.8527	26.3453	27.7072	22.5071	22.0513	26.7578	23.8461	26.4887	28.7033	24.5559	27.2334	23.6121	28.8996	27.4875	26.8603	25.9613	20.5944	20.741	22.5028	28.6479	22.6071	21.9564	24.3492	24.0476	28.329	23.4479	0	25.3255	22.6347	26.4899	19.6883	25.9105	24.6699	21.4972	20.3768	0	24.1918	31.8089	24.5078	21.3778
19.7694	22.4767	18.7976	22.6106	21.3535	22.745	22.5694	0	26.2666	31.5882	31.1036	23.2263	25.4711	23.1064	21.0119	27.768	24.7269	24.9833	31.9648	23.4892	29.797	22.2446	0	21.6403	24.1774	29.7889	25.2773	24.0045	22.9051	25.4439	22.3449	22.7991	27.9796	23.3015	26.8822	0	20.3648	25.989	24.5914	23.2037	0	22.6029	22.0378	23.6818	23.7279	24.5282	26.3874	32.3626	24.1626	19.4812
24.2219	27.4923	19.9067	0	24.8503	0	0	0	25.4632	37.4032	30.0689	25.0094	24.9755	23.9958	22.7179	27.8631	24.0573	25.8773	27.3005	26.1747	27.9316	22.8589	27.8967	27.0825	25.9231	25.8886	22.313	0	22.3377	26.1768	25.6108	23.5949	24.6824	23.7508	29.2553	22.5987	0	22.8572	23.1053	22.7203	18.9481	23.9296	24.8687	0	21.4232	20.7892	24.4063	32.2694	21.4147	0
22.8253	23.5626	18.7722	22.6145	22.5734	23.9737	22.7088	0	25.7418	31.1073	30.3418	23.0564	25.4661	23.19	21.6191	25.6517	24.4065	23.5449	32.1923	22.3183	30.5289	21.0049	24.0967	21.4773	24.3637	29.0927	24.4058	23.1215	22.9842	24.7291	0	22.9986	27.5856	21.6692	27.0276	0	23.538	26.1044	26.3952	0	18.0174	21.9498	21.9212	23.6591	22.9505	23.68	25.5327	31.6546	21.7268	0
25.3607	21.3941	18.9719	19.9877	24.646	20.5845	15.6666	0	25.7536	31.2946	30.2026	24.8222	24.2511	22.8798	22.3976	26.7963	24.1174	24.8397	27.1645	23.1637	28.3826	22.5141	26.7604	23.9909	25.6087	25.8344	20.6677	0	22.4752	23.5169	23.2954	21.658	24.4272	22.2385	26.3018	20.1226	0	25.7143	23.0624	0	0	22.6248	21.4163	0	22.0623	20.7563	23.6232	31.7658	23.8761	22.2067
23.0845	25.2067	22.4985	21.7835	24.4579	0	0	0	27.2219	34.4162	31.8019	23.0725	24.7639	24.5125	23.9422	28.3084	25.5615	26.3451	28.7864	25.6147	28.136	23.8062	26.9243	24.7501	25.1366	25.4587	22.6694	20.0882	24.3377	26.4395	22.679	24.0791	23.9	23.946	29.0063	20.765	0	23.5764	23.758	21.2376	19.1543	24.0622	24.5445	20.7569	21.8957	22.7901	25.2221	33.3943	27.0916	22.9149
23.6987	23.2673	19.0282	21.8571	23.0551	21.0851	21.9778	22.971	27.8695	32.5024	32.5863	24.3616	26.7234	25.4313	24.3602	27.8706	26.5109	25.1953	28.7121	24.5659	28.7944	24.0323	23.8567	23.6653	25.7746	27.4478	23.163	23.4736	25.171	25.3437	23.9066	24.8668	26.4778	22.6778	27.3373	21.0138	0	26.0018	23.386	23.7572	0	24.7761	22.7296	22.8314	21.8415	21.8936	24.5425	34.0202	24.8524	21.4335
25.1204	25.809	20.921	0	25.5183	20.4927	0	24.15	26.8548	35.437	31.352	24.3138	27.0867	25.3523	22.5801	26.3682	25.1944	26.3647	26.999	24.2028	27.3694	21.7764	26.2375	26.889	26.1162	25.4112	21.4163	21.6164	24.858	27.0994	24.9261	23.6208	24.9797	22.7874	29.5929	22.3922	0	23.1647	21.1649	23.8185	0	23.3943	24.1211	22.0077	21.1911	0	22.908	32.9216	26.4387	21.9268
24.0307	0	18.821	19.5605	24.4142	22.3989	0	18.8328	25.3466	31.8094	30.0922	22.2013	25.7635	23.6128	20.3623	25.3567	24.149	21.4231	24.7091	20.6778	26.3721	19.9661	24.1371	24.5863	24.0925	23.4842	22.0202	21.2463	22.8228	28.01	22.0157	23.0598	21.7365	21.8065	26.8974	19.1562	0	24.8763	0	22.9015	0	21.2027	20.9511	21.0851	0	0	23.5578	31.1056	24.4798	22.3818
0	23.5199	17.7264	21.4024	22.4241	21.7022	18.8546	21.0581	26.2505	27.6535	29.8739	22.6269	22.6138	22.9521	21.0096	25.4618	23.7919	23.9382	29.487	22.744	29.1876	19.7779	22.0218	20.8453	23.477	28.3637	22.3098	22.5148	22.7747	24.7532	21.0057	22.3664	26.0477	20.1861	25.9803	0	17.8777	26.9644	23.629	24.2993	19.1918	21.1479	19.2086	24.7848	21.8552	24.9066	24.7973	31.4412	21.4792	0
24.3734	25.7758	19.9994	19.9853	25.1456	0	18.6785	19.8565	25.0072	34.4489	29.4589	24.386	24.924	21.844	20.9812	26.0508	23.4374	24.9627	26.0916	23.1171	27.6861	21.4666	27.5592	25.729	26.1617	29.8648	19.4973	0	23.0875	28.5186	25.8314	21.6224	25.9687	22.8076	25.4983	24.075	21.1868	23.0429	22.1257	22.6059	0	22.8718	23.5948	0	20.8068	23.6614	23.7434	30.449	23.4568	22.3883
24.8482	26.2677	20.7897	0	25.2144	0	0	23.6966	26.352	36.3545	30.7239	24.3571	25.2444	25.5308	22.095	26.705	25.0143	25.8296	27.1345	23.9276	27.7954	21.5032	27.9623	25.8644	26.1177	26.265	20.2778	0	23.922	26.8068	25.0779	24.9796	24.6305	23.3828	29.0849	22.9964	0	25.0124	22.9837	25.2888	18.742	24.3093	24.0621	21.9512	21.2587	21.9542	22.589	32.4966	24.3723	0
25.0327	23.3855	19.4502	0	25.0713	0	16.9187	22.1726	24.9899	37.2888	29.479	24.1582	25.7938	23.3018	22.3084	25.7474	23.5117	26.056	26.7474	23.76	26.9301	21.623	28.1947	26.2769	25.4976	24.5433	20.7986	0	23.2594	26.1015	23.8723	22.0203	23.7335	22.7006	28.3935	23.2091	0	25.7077	21.4845	22.6724	18.5875	22.3224	23.401	21.5571	20.5129	20.894	21.9714	31.04	24.8246	23.9285
23.1056	23.7646	18.4356	22.2515	22.3869	23.1088	21.1739	19.2715	27.9752	33.5309	32.5658	23.6987	23.4278	25.5147	23.0084	28.7785	26.5568	24.8446	30.5498	24.3587	29.1534	22.1589	23.2635	22.9014	25.2497	28.8674	22.358	23.5489	25.0232	24.8318	19.8686	24.6489	26.6692	21.311	26.4874	0	20.021	27.64	23.0881	21.7265	19.0203	23.4313	20.6821	23.8546	22.6849	25.0957	23.4256	33.4078	25.1479	21.0408
25.1208	29.0005	22.0165	0	25.664	0	0	23.6342	27.942	36.7568	32.6312	23.6117	25.7484	25.5376	23.4822	27.043	26.5616	26.0677	26.7746	24.5102	27.1956	22.5085	27.3896	26.8502	26.3321	26.1213	21.9383	0	25.073	26.7214	26.2141	24.9237	24.0401	24.3802	29.9532	23.4725	20.2085	25.7184	0	25.832	20.7894	24.1459	25.059	22.0791	0	0	22.9892	34.422	26.6269	24.6419
23.7703	26.127	20.2108	0	24.4191	0	0	23.5959	27.5826	33.0133	32.8194	23.0361	25.4305	24.5952	23.989	28.3878	24.8933	26.1802	27.6083	22.3318	27.3544	23.5037	26.4039	25.8568	25.7924	24.1964	19.8879	0	24.011	24.4253	24.1854	24.2419	23.7717	20.9738	26.4379	22.722	0	24.4439	0	24.1246	0	23.4852	24.0396	21.4555	21.5666	0	23.2869	34.0296	24.6001	0
23.0422	24.0688	16.6882	22.3175	22.9641	22.2578	22.6421	21.4244	24.3007	30.6413	28.814	23.1761	24.8344	21.978	21.0398	24.6834	22.8675	24.1323	32.0365	22.9501	30.0348	20.9123	0	23.2023	24.9579	29.9272	23.653	23.3507	21.6568	24.5514	0	20.3735	27.1216	21.3942	26.9881	0	0	27.677	24.6292	21.8018	0	22.6148	21.2022	24.4877	22.4418	24.2398	24.4937	30.6088	22.4331	0
26.7263	21.2587	19.7808	0	26.2106	0	0	21.057	25.8121	36.2755	29.9659	26.8249	25.7351	22.9234	22.7347	28.0294	24.1129	26.8203	28.6375	24.7408	26.6818	23.1402	28.4824	24.9638	27.7466	23.0559	0	0	22.6382	26.9976	23.0546	23.5583	23.0414	21.5014	26.5718	20.0447	0	24.8153	19.8631	20.7045	16.8972	25.1538	22.8886	0	19.6661	21.7573	22.4823	31.8176	21.7029	0
24.9378	27.7323	20.7681	0	25.983	0	0	24.8627	26.4587	38.0708	30.4493	25.8674	26.8266	24.4239	23.548	26.3806	25.173	28.0048	25.7432	24.9389	27.5844	21.9946	26.661	28.8158	26.8741	25.9851	18.7698	0	23.4314	27.4135	26.9183	23.9275	25.4548	22.9491	30.5796	23.5119	0	20.8155	22.8494	25.5022	0	24.5035	25.4645	21.1081	19.637	0	22.1833	32.6326	25.9541	24.8251
22.1766	0	19.1215	19.5663	24.493	0	0	0	24.3589	33.2916	28.2367	23.5693	21.7343	23.9584	20.3831	25.668	22.3726	22.6348	27.9256	22.4664	28.2218	21.1776	24.9203	24.287	25.1272	24.9306	23.0078	0	22.8688	27.3838	0	25.2949	22.7405	22.2919	26.2775	0	0	25.5158	23.3383	22.9088	0	22.3642	22.0326	0	22.5382	27.3929	25.504	29.6628	22.9466	21.6501
25.4395	25.2255	0	0	25.5615	0	0	23.8966	26.8455	36.7794	31.9951	24.1634	26.6312	25.6496	23.202	27.8655	26.1935	27.4145	27.341	24.3874	27.6908	21.8451	27.1879	27.841	26.0667	25.7958	20.3936	0	25.471	27.2359	25.6601	25.2288	24.6782	20.6658	27.2209	23.3464	0	23.0805	21.4121	25.9475	0	24.0557	23.5428	22.1124	0	0	20.7885	33.465	26.1538	23.6613
21.5356	21.7481	19.2959	20.8724	23.5169	22.0419	19.2503	24.692	27.2596	32.8658	31.6548	23.9662	24.363	24.6201	23.0654	26.7807	25.8019	25.3841	27.3126	24.3179	28.819	23.3139	23.5817	25.9462	25.4442	26.5035	21.458	0	24.8299	25.5721	25.4231	24.0217	25.4307	21.8413	25.5424	20.9205	0	25.2207	22.7447	22.4441	0	24.3078	21.495	21.5983	21.6779	23.9128	23.1486	33.041	24.3128	20.5436
21.9298	24.6952	18.1173	22.1775	22.4504	21.9889	21.6308	0	25.7999	31.1832	30.1353	22.5048	24.7954	22.9502	22.7704	26.5406	23.7648	28.4613	31.6628	25.1512	29.5981	22.0538	22.312	22.8067	24.1636	29.6245	23.4118	21.9854	23.1953	24.5286	0	22.3144	26.4149	21.9357	27.7699	0	21.0488	28.6334	24.1514	0	0	22.7386	20.8447	24.5317	21.3059	24.5776	25.8807	31.5992	22.5417	20.6282
24.9021	25.5427	20.6222	19.7177	26.353	0	18.3909	24.1047	26.8296	36.9383	31.8665	26.7003	27.8656	26.7952	22.5187	26.7224	26.0533	26.2154	27.3159	24.666	26.8779	22.5566	26.2075	28.3416	27.5275	24.3635	20.9519	0	26.4826	26.5837	24.4888	26.3445	24.7716	23.758	29.262	21.7983	0	24.4076	0	25.2492	0	23.4917	23.8599	22.2554	20.5621	0	22.8234	33.3043	24.0188	23.0255
24.8323	24.8694	19.7393	18.7763	24.4368	21.2639	20.3431	0	24.0449	36.0207	28.3449	24.8423	24.5903	22.2049	19.7935	25.22	22.7181	24.0947	27.3091	23.626	28.3342	21.2967	26.9321	24.8479	25.6084	25.42	21.353	20.6477	21.4298	27.0593	20.751	20.4222	25.3215	22.7212	27.5428	0	17.0414	26.7949	24.1434	0	0	22.1563	23.0408	21.9074	21.2295	22.6102	24.4114	30.1003	19.6409	0
23.0829	24.071	19.5605	22.4055	22.6086	22.0894	22.236	0	24.3795	31.3814	29.2306	22.8845	25.9142	22.2415	20.0106	24.61	23.0958	22.9142	31.7804	21.1671	30.5853	20.1718	0	20.151	24.6408	29.5626	24.5638	23.1602	21.6545	23.2641	18.7334	22.0384	27.3224	21.3657	26.8851	0	0	28.0777	25.5073	20.7527	0	21.801	21.7755	24.4862	22.59	21.3594	25.2297	30.3725	22.0384	21.1823
24.837	23.9906	22.0443	0	24.8744	0	0	22.7017	27.4086	35.661	31.3822	25.6242	26.181	24.1839	23.3508	26.8207	25.4177	25.8788	25.9816	24.2076	26.838	22.4072	26.0197	27.6388	26.7803	24.5428	20.7794	0	23.6573	26.9995	25.9623	23.7978	25.0246	23.0852	31.412	23.3508	0	23.2457	20.0881	24.2175	20.6084	24.5241	24.7008	21.6721	20.8238	0	22.9709	32.9035	24.5865	21.8005
25.2351	26.1609	19.7955	0	25.9049	0	0	22.0245	27.5418	38.4931	31.7455	24.9522	25.9116	25.232	23.3742	28.7039	26.0587	26.4687	27.4816	24.2435	27.2998	23.0451	27.3997	27.1542	27.0731	25.4195	21.7645	0	24.9514	27.1387	25.1531	24.5153	24.2196	24.4677	27.9776	23.8895	0	24.7911	20.0359	25.4255	17.5088	23.7833	24.5344	21.7604	20.6789	21.8826	0	32.923	23.0053	0
24.5539	25.2684	21.0045	20.3547	24.8072	21.7613	19.2968	19.334	25.6085	37.3324	29.8897	25.7806	27.1065	23.0032	19.9223	26.1239	24.4729	24.1988	26.2921	23.9594	26.9996	22.8118	27.515	27.9717	26.2511	24.2639	20.8006	0	22.6476	26.4114	24.5803	22.2846	24.6426	22.0498	29.6318	22.4222	0	24.5126	22.2821	23.2912	0	24.4954	23.3427	0	21.1957	0	24.9914	31.4272	22.6366	21.4537
23.2414	26.4225	20.9893	22.148	24.0934	21.9736	21.4593	22.7456	24.7452	35.7211	29.5074	23.4448	24.2634	23.5579	21.7481	26.1464	23.4942	27.8892	30.4076	24.9083	29.8331	22.0048	24.5091	24.6981	25.6686	28.1904	23.7975	23.1847	22.3386	25.2701	24.0453	22.8785	26.4361	22.3063	28.7936	20.5982	0	26.8028	23.9473	23.0943	18.8626	23.6297	23.3304	23.6387	22.0334	22.9718	25.4474	31.1377	22.8921	0
24.0965	26.1023	21.369	0	25.243	0	0	24.4168	26.6403	37.9764	31.645	23.916	25.9576	24.2097	24.6244	27.6875	25.3846	28.2057	26.3792	25.1658	26.946	23.5691	26.415	27.5343	25.11	25.6281	0	0	24.2898	26.3361	25.7159	24.7202	23.6686	23.0715	27.8999	22.9387	0	25.121	0	24.5752	0	24.2077	24.6665	20.9394	18.5411	0	21.1505	33.3182	24.1972	19.7769
22.374	25.1166	17.9688	21.4835	22.4665	21.8784	22.5486	21.2181	24.9999	32.9	29.2038	23.45	24.232	23.2956	20.4057	25.469	23.8215	24.6122	31.9389	22.5219	29.4023	21.2267	24.388	22.777	24.6166	29.1933	23.9568	22.9643	21.9101	24.6325	21.5956	22.4842	27.3614	22.4392	26.5308	21.3388	19.1658	27.7081	25.3664	19.9363	15.5462	23.0563	21.8684	24.1164	22.5397	24.2128	23.8378	30.281	24.6758	20.4812
25.231	26.6212	20.0995	18.398	25.7976	0	18.9838	23.9834	27.3527	37.914	31.9536	25.0653	25.96	25.4904	21.5994	25.6404	26.6995	28.269	27.1307	25.9607	27.5147	20.6082	27.9825	25.9117	27.3203	27.4568	20.8056	0	24.9654	26.5804	25.13	24.7361	24.5975	22.412	28.1367	23.9832	0	0	23.3896	24.0923	0	24.8106	24.6751	21.9169	20.6136	0	21.7767	33.5588	26.0172	22.4362
24.4888	23.772	20.2489	0	25.5364	0	0	25.12	25.7793	36.17	30.1182	24.257	25.7714	22.9314	20.2567	26.5482	23.7236	24.6289	26.1575	24.3913	28.1192	22.6886	27.7056	27.0583	26.0733	26.448	19.9378	0	25.1826	27.0894	24.3665	21.48	25.2952	23.6503	27.5494	22.5607	22.8488	24.263	0	25.1345	0	25.4317	22.42	22.7378	20.052	0	22.2054	31.4791	22.0407	0
24.6982	28.0151	23.6014	0	25.2355	0	0	24.2089	26.2999	38.1685	30.4206	25.9799	25.6814	24.0024	22.4825	27.4614	24.5272	27.83	27.5618	25.0867	27.9421	22.0319	28.3731	27.9967	26.9965	26.402	0	0	23.2715	27.0012	25.4255	24.1256	24.2287	22.8733	29.2887	23.7748	0	25.8	21.2429	25.1378	20.7039	24.3072	25.4967	22.1492	0	0	23.0887	31.9057	23.0254	0
24.6779	21.9296	20.9118	20.4651	24.6866	0	0	0	29.0454	35.0224	33.1593	25.0579	26.3721	26.1434	22.7569	28.2236	27.6534	25.3534	27.1934	23.2511	27.0779	22.5634	24.263	25.0745	25.5807	24.7373	21.0565	0	25.8672	26.2988	25.1631	25.8164	25.2205	23.0643	27.7598	22.5251	0	24.7152	20.3104	23.2306	0	25.1413	22.4917	20.5834	21.0774	0	22.4059	34.5208	24.6566	20.2596
21.3426	24.4826	18.0858	21.7067	22.5261	22.1282	21.8871	19.6334	25.5821	29.9777	30.1877	23.089	23.8069	23.0631	21.4912	26.8065	23.4866	23.5607	31.2145	22.263	29.8102	22.3328	0	22.5233	24.355	29.5405	23.0626	22.2862	22.2029	21.8269	0	22.3889	26.3653	21.0827	24.9323	0	0	27.2739	24.593	0	0	23.226	20.9223	24.4196	22.4381	24.0696	23.0234	31.0026	24.2036	23.1534
24.8405	28.1274	22.4225	0	25.4149	0	0	23.9742	29.5061	38.4414	33.4614	24.1349	25.4212	26.1715	24.5013	27.1518	26.9164	27.0563	26.1508	24.4469	27.3222	23.0035	27.0409	27.6922	26.2549	25.3189	20.4756	0	25.9008	26.2009	24.8931	25.8879	24.5417	23.6568	29.3226	23.3791	0	23.6038	0	25.8771	20.9184	23.22	25.85	20.3391	20.1233	0	22.0961	34.8636	24.079	22.2489
22.9781	21.4895	18.966	20.5003	24.8332	21.5038	18.3041	21.1108	26.051	33.5962	29.7978	23.4742	24.0206	23.3441	21.0388	25.086	23.9927	24.0122	26.2787	21.8267	28.2559	21.431	25.5769	25.2746	25.338	27.0991	22.253	21.0533	23.8264	26.5287	23.3204	23.1436	24.4829	22.5067	25.4981	20.1397	0	23.1038	23.1896	23.9019	0	23.1892	21.5631	21.9559	21.6775	23.8897	24.5337	31.3046	23.5611	18.7202
25.0731	25.0063	19.1118	19.9849	26.2395	0	0	23.3961	28.4124	35.3914	32.7609	26.2984	26.3101	25.5646	25.1269	26.9624	26.8434	26.2938	27.5427	25.0805	27.1983	23.9431	27.3504	26.5962	26.9467	25.3763	19.938	0	25.3527	27.7564	26.1212	25.1931	24.8347	24.4399	27.6544	23.3797	0	26.5359	21.5471	25.8021	18.1528	24.6721	23.3653	22.7616	20.937	0	21.4501	34.1838	26.1707	22.2485
26.0148	24.8283	19.6045	20.6717	26.5405	0	0	23.8155	26.3524	34.817	31.0514	24.4239	26.2226	24.2405	22.1693	26.7551	24.6932	25.8599	26.1745	23.9918	27.6566	20.7678	28.1356	26.0766	26.0601	24.8797	19.4679	0	23.4116	28.5882	26.9562	24.0574	23.9655	24.4542	28.1315	22.3569	17.4707	25.5296	21.3186	25.0408	18.6317	23.9733	23.7429	22.4477	21.4482	24.1886	22.7106	32.7011	22.2806	21.83
24.945	26.2072	21.1527	0	25.0401	0	18.5562	21.5371	27.8203	37.3292	32.2366	25.5603	26.9743	25.06	23.4507	28.5288	26.4253	26.6999	27.8776	24.6352	27.3208	21.868	28.2625	26.8836	26.5293	27.0752	21.2469	0	24.8428	27.9433	23.4873	24.9021	24.8947	23.6094	27.7089	0	22.7379	24.6055	17.5039	23.508	19.5349	22.7849	24.5419	0	20.8053	0	22.7721	33.5872	25.5982	23.0262
25.6078	23.1864	18.494	0	24.6187	0	0	0	28.3185	37.709	32.6154	25.3549	25.5556	25.2544	24.0554	27.3674	26.3859	26.7161	26.727	25.2786	26.9394	23.7089	27.5485	26.7745	26.3733	24.4088	0	0	24.9391	27.4706	25.6459	24.6916	22.9259	24.7235	28.0534	23.2726	25.1056	0	0	23.8965	0	24.3835	23.0998	0	0	0	22.0786	34.1435	25.342	20.3057
26.1669	26.2726	20.8463	0	26.6263	0	0	18.1068	26.2949	34.6284	30.3996	25.5796	23.8563	23.3787	21.0552	26.3518	24.4799	24.8222	26.8322	23.4407	27.1522	23.3888	29.2134	25.6499	26.7165	24.8236	19.3497	0	23.3205	27.7414	26.0775	22.8329	24.2329	24.3203	27.6277	23.2553	0	25.3154	21.56	23.5292	18.6799	24.6892	25.0998	0	20.1805	19.7997	23.8504	31.9611	24.411	20.3123
25.2986	19.8849	18.7556	0	24.4515	0	18.5245	22.2004	25.4834	33.789	29.9817	25.169	24.8182	22.6159	20.7119	25.3903	23.4703	24.5611	26.5445	22.4271	27.6767	20.61	26.622	26.8717	25.9479	27.2806	0	22.5136	22.0667	27.6024	22.0908	21.7882	23.8082	26.4254	29.5231	0	17.6286	25.8337	22.7967	24.7373	0	23.1533	22.8856	21.3713	19.4875	0	24.3248	31.0284	21.4164	20.1699
24.072	25.7923	20.4837	0	24.7229	21.4847	0	23.6938	28.2123	37.6622	32.4175	25.266	25.5113	25.1715	24.0372	27.0568	26.8642	26.0309	26.7146	24.3136	27.1832	23.0426	26.7424	27.8258	25.871	26.2932	21.5469	0	24.9803	27.6074	25.1455	24.6888	25.2911	23.9076	27.7136	22.6079	21.8535	24.6498	21.8048	25.2192	18.8482	24.4919	23.2732	22.1116	21.0745	23.2295	23.0024	34.0823	25.1639	21.5906
24.7404	24.8561	20.4506	0	24.6947	0	19.5343	23.2631	28.8127	37.2049	33.0993	24.671	25.9627	25.921	24.1037	28.125	27.2197	25.3241	27.487	24.571	26.9906	23.7616	27.1781	26.8831	26.3679	26.0179	20.4673	0	25.4595	27.0149	24.0476	25.4072	24.6833	23.2176	28.1485	23.7283	20.1973	24.5871	22.8302	24.745	18.0158	24.4649	23.9032	21.5901	20.9207	0	22.0554	34.5192	25.1171	22.5382
0	21.4095	0	0	22.8506	0	0	0	31.1064	28.8853	36.0245	24.4234	24.253	28.9336	22.2718	27.2509	30.3657	24.2151	27.6027	23.3337	26.6715	22.7589	23.1966	24.142	25.7067	24.5508	19.5355	0	27.9272	24.6874	24.8854	28.1398	24.7008	20.8283	25.7168	22.2569	0	26.5009	23.095	0	0	23.1965	21.7102	21.6524	20.9341	25.7893	21.3597	35.9171	29.2066	28.3233
25.2449	20.0132	23.3491	19.8416	25.8406	0	0	19.3439	26.7585	37.6766	30.8542	24.5997	24.8098	23.8619	22.5364	26.7206	25.2897	23.9762	27.1527	24.2969	25.5406	23.6091	27.8841	26.5033	26.6916	24.0991	20.2471	21.7296	23.7607	29.1412	24.4134	23.1029	23.5471	23.2113	28.5334	20.4271	0	24.9806	0	0	21.4189	23.9413	24.6899	0	19.98	25.0114	22.4453	32.8567	24.0157	21.9108
23.4004	22.6895	19.8427	20.7256	25.5611	23.2724	0	20.9452	23.882	33.8381	28.8087	23.2881	23.475	21.6943	21.8157	25.1034	22.9339	23.6417	25.6774	22.9365	28.3937	22.2037	26.4686	23.0338	25.5472	25.2303	21.803	20.3069	26.4365	26.9466	23.203	0	24.5279	23.1574	26.7085	21.5537	20.5944	24.4115	22.1745	22.9322	0	24.6406	23.0888	22.0964	21.4862	24.7052	24.9799	30.4653	20.606	18.3629
24.9946	24.8737	19.6475	0	26.1606	0	0	24.0369	28.6918	36.3516	32.7223	24.4091	25.8555	25.6033	23.0791	26.8354	26.4709	25.9048	26.5025	23.8608	27.6536	22.6885	28.3478	26.2224	25.7621	26.1396	0	0	25.4284	27.5411	24.9685	25.2164	24.4571	23.757	27.323	23.2839	0	22.3053	22.5918	25.2349	0	24.2249	24.1058	22.1068	20.2541	0	22.2184	34.2974	25.4187	22.8509
25.7593	24.7115	20.0934	0	25.6433	0	0	0	26.7717	36.045	31.1103	26.9589	23.7538	23.7027	22.7883	27.4271	25.1745	26.6063	27.5453	24.7282	28.4524	23.6528	28.9153	22.2494	27.3884	25.116	20.2406	0	23.4514	27.7137	24.5611	23.3071	25.513	23.3166	26.9558	21.8808	0	24.6997	21.6471	0	0	24.876	23.7812	18.8116	20.1119	19.9981	23.0226	33.0866	24.5642	20.1748
24.4923	0	19.577	19.9837	26.3963	22.287	19.7482	0	29.9075	32.6741	34.6367	23.3757	25.0512	27.0793	21.9227	27.6435	27.9842	24.2223	27.6965	23.4629	27.2945	23.4603	28.4127	22.9233	25.9139	26.2539	20.7522	20.8762	26.0701	27.3662	21.5827	26.4036	25.2697	24.2342	24.9573	20.5859	0	26.1462	21.068	27.5581	0	23.2483	22.0413	22.4696	21.4123	19.2096	22.4489	34.9471	28.855	28.4773
25.1338	24.5353	19.7503	0	25.5294	0	0	24.452	27.9441	33.2185	32.6686	25.4409	26.3983	25.185	23.0349	27.7064	26.659	25.9469	28.0366	25.5218	27.7149	24.5291	26.8703	27.121	26.6404	25.1895	20.7589	0	25.0021	26.4358	24.4607	24.7017	24.298	24.1645	27.1019	21.7453	24.3593	26.2149	0	24.4872	0	25.0649	22.1381	21.0914	20.795	23.5182	23.2605	33.6824	26.1419	22.9521
25.9038	27.6667	21.048	0	25.3353	0	0	22.2056	28.6736	38.104	33.1572	25.8452	25.4647	25.8951	24.4999	28.4471	27.1562	27.5196	27.9117	25.9349	26.3973	24.7065	28.0671	26.3045	27.0692	24.3107	21.2642	0	25.5762	27.9755	23.3962	25.4089	23.9543	24.8989	30.8218	22.8709	24.8304	24.7533	21.0223	24.5648	19.3628	24.6385	26.1481	21.5148	20.8692	0	22.0596	34.631	25.2236	22.4047
24.8274	24.2802	20.9609	0	25.0082	22.0365	17.2941	0	30.6163	37.4168	34.6105	24.9994	25.4649	27.553	22.9191	30.1829	28.5961	26.8543	28.3818	24.82	27.4053	23.6528	28.1662	26.1768	26.8174	26.5195	0	0	27.2168	25.9931	23.7925	26.9319	23.7187	23	28.2178	0	23.6188	24.6405	21.2337	25.6494	0	24.1562	23.2416	21.1397	21.0962	21.9113	24.5014	35.6763	29.2296	25.9332
26.398	21.8928	18.3721	0	25.7777	0	0	19.0925	24.5334	34.7922	29.0378	25.0492	26.1515	21.8856	21.1818	27.078	23.014	24.5801	28.0944	22.7471	26.3061	22.1421	28.2437	24.3025	26.3954	24.5339	20.974	0	21.0755	25.6526	18.6352	23.1216	21.956	24.2422	26.5124	0	0	25.4708	0	0	0	24.3691	21.999	0	19.9936	0	21.83	30.2808	21.9276	0
23.5124	0	19.6619	20.081	26.5887	0	0	21.2515	26.4101	34.1407	30.4791	25.3738	23.5737	23.6486	22.3431	27.0478	24.9289	23.8735	26.7585	22.6808	25.1719	22.3097	26.6853	25.6298	26.1031	27.9288	20.4248	0	23.5241	29.4024	26.5886	22.9825	24.2045	24.9355	26.5694	21.7856	18.6431	25.5174	19.8699	0	15.7736	24.2698	23.343	21.5153	19.6555	25.5152	22.9761	32.1869	22.3501	0
23.7489	22.1293	18.8308	19.9146	24.4539	21.7836	0	0	26.6555	34.5182	30.6839	25.1388	23.055	23.5982	21.0995	27.1376	24.5586	24.1825	26.9428	23.0506	28.8489	22.3093	24.9806	25.6539	26.2682	26.7794	22.5882	20.9762	23.6338	26.8024	24.7108	24.0621	25.8904	23.1461	25.7543	22.3845	20.3745	22.5392	22.8037	23.7469	0	25.4701	21.6244	22.0571	22.5175	25.5836	25.4398	32.3976	22.5169	19.6361
23.5252	22.0127	18.9419	21.9548	22.4222	23.1418	21.899	0	26.0948	32.7152	30.1803	23.4748	23.9522	24.2824	22.8668	27.8453	24.6745	25.1584	32.0434	23.8319	30.4993	22.8285	0	21.7856	25.263	29.2596	22.1784	23.4601	23.9988	24.5745	20.9859	23.7024	27.2759	18.8124	25.5717	0	0	27.0801	24.4696	0	0	23.0499	21.8664	23.3468	21.7169	23.3283	26.1172	31.5206	24.373	19.7936
23.7905	24.418	19.9629	20.5624	24.9185	21.28	16.1426	0	27.1446	35.7923	31.1251	25.4893	24.4116	24.0607	22.591	27.847	25.2414	25.743	27.9062	24.4928	28.1267	23.0537	27.3899	24.7541	26.5073	27.3463	22.4588	0	23.9333	26.1676	24.2491	23.8579	24.2878	22.4397	29.7502	22.0559	0	25.9544	23.4694	21.4719	17.3755	24.1989	22.2562	21.5906	21.6799	23.3542	24.9381	32.8822	24.0606	23.246
22.6564	22.7646	17.7941	22.5032	21.1417	23.2423	20.906	0	24.7666	28.8934	30.0801	21.7643	24.6165	22.5673	22.5704	26.3031	23.949	25.3142	31.273	23.713	30.1208	21.1716	0	21.5644	23.1263	29.6296	24.3503	23.5924	23.0164	24.3007	0	22.3909	28.1142	21.4083	26.0675	0	19.5256	26.807	25.1477	23.6201	17.7658	21.3205	21.3875	23.7155	22.4419	23.5186	24.3267	31.2945	22.9587	19.8895
25.2269	22.7395	19.2858	18.389	26.3137	0	0	20.9971	26.318	35.0682	30.9118	25.513	25.4653	23.5299	22.1761	26.1501	24.8043	25.6699	26.4078	23.5631	27.3056	22.0716	28.791	24.0371	26.7619	24.785	20.2209	0	23.3113	27.1427	25.5726	22.776	23.2275	25.3745	27.076	23.641	0	24.2263	22.3336	25.1748	16.443	23.145	24.1566	21.8532	20.3721	20.597	22.4656	32.5657	23.4553	19.7558
25.2862	20.7236	17.7429	0	27.6821	21.5816	0	19.8433	24.8005	29.7236	29.4395	25.706	26.1744	22.5293	21.1505	25.9276	23.1149	23.2242	27.4067	22.7422	26.8494	22.2798	28.5257	24.5839	26.6892	25.3388	0	0	22.2852	29.5701	21.4979	21.9053	22.8203	24.5416	25.2773	18.0706	21.5468	25.1891	21.7701	22.9956	0	24.1657	21.9465	21.3492	20.8774	0	24.2947	31.0867	23.4294	21.2399
24.6105	19.639	19.1435	19.9518	25.0274	20.6013	0	17.829	26.3647	30.593	30.3568	25.2982	22.7084	23.5298	21.8506	25.9887	24.7986	22.9787	26.7749	23.0013	27.8331	21.9444	26.81	22.3289	26.6412	25.3724	20.3375	0	23.0716	21.5305	23.5592	23.1025	23.669	21.9857	24.2018	23.0441	0	26.2064	23.7656	0	0	25.3776	21.3658	0	21.5729	20.2842	23.2657	32.319	22.5901	19.6572
[truncated: 1,843 more rows]
[truncated: 520 more columns]

## Sheet: TPD_dis_umap
Supp.Data6.Tab8 The UMAP data for MCP based patient visualization					Supp.Data6.Tab9 The UMAP data for dlfq based patient visualization					Supp.Data6.Tab10 The UMAP data for maxlfq based patient visualization					Supp.Data6.Tab11 The UMAP data for top3 based patient visualization					Supp.Data6.Tab12 The UMAP data for top1 based patient visualization
[truncated: 580 more rows]

[truncated: 2 more sheets: clustering_performance, patient_diagnosis]
